# Supplementary material for: FER-mediated phosphorylation and PIK3R2 recruitment on IRS4 promotes AKT activation and tumorigenesis in ovarian cancer cells
Source: eLife. 2022 May 12;11:e76183. doi: 10.7554/eLife.76183 (PMC9098222; doi:10.7554/eLife.76183)
Supplement: Supplementary file 1. — Identification of novel substrates for tyrosine kinase FER by pTyr immunoprecipitation and in-gel tryptic digestion followed by mass spectrometry analysis in Figure 1B. The details of raw data analysis and database search have been described in the section of Materials and methods. The analyzed MS data was provided in Supplementary files 1-6. Potential FER interactome between 25- and 37 kDa is shown in this file. [file elife-76183-supp1.xlsx]

## Sheet: Chris_25_37_results
Database	UniProt_human 20161004
Type of search	MS/MS Ion Search
Enzyme	Trypsin
Variable modifications	Deamidated (NQ),Oxidation (M),Phospho (ST),Phospho (Y)
Mass values	Monoisotopic
Protein mass	Unrestricted
Peptide mass tolerance	30 ppm
Fragment mass tolerance	0.3 Da
Max missed cleavages	1
Instrument type	ESI-QUAD
Number of queries	48500
Significance threshold p<	0.005151
Max. number of families	AUTO
Ions score or expect cut-off	0.005151
Preferred taxonomy	All entries
Show Percolator scores?	no
Family	Member	Database	Accession	Score	Mass	Num. of matches	Num. of significant matches	Num. of sequences	Num. of significant sequences	emPAI	Description
1	1	UniProt_human	P04406	6559	36030	228	228	19	19	46.08	Glyceraldehyde-3-phosphate dehydrogenase OS=Homo sapiens GN=GAPDH PE=1 SV=3
2	1	UniProt_human	P05141	6315	32831	309	309	25	25	39.96	ADP/ATP translocase 2 OS=Homo sapiens GN=SLC25A5 PE=1 SV=7
3	1	UniProt_human	P06493	4922	34074	219	219	24	24	65.59	Cyclin-dependent kinase 1 OS=Homo sapiens GN=CDK1 PE=1 SV=3
2	2	UniProt_human	P12235	4439	33043	184	184	18	18	15.41	ADP/ATP translocase 1 OS=Homo sapiens GN=SLC25A4 PE=1 SV=4
4	1	UniProt_human	P13645	4266	58792	126	126	28	28	14.36	Keratin, type I cytoskeletal 10 OS=Homo sapiens GN=KRT10 PE=1 SV=6
5	1	UniProt_human	P35527	4094	62027	124	124	30	30	13.29	Keratin, type I cytoskeletal 9 OS=Homo sapiens GN=KRT9 PE=1 SV=3
6	1	UniProt_human	P04264	3865	65999	130	130	36	36	16.88	Keratin, type II cytoskeletal 1 OS=Homo sapiens GN=KRT1 PE=1 SV=6
2	3	UniProt_human	P12236	3407	32845	194	194	19	19	18	ADP/ATP translocase 3 OS=Homo sapiens GN=SLC25A6 PE=1 SV=4
6	2	UniProt_human	P35908	3294	65393	94	94	32	32	8.64	Keratin, type II cytoskeletal 2 epidermal OS=Homo sapiens GN=KRT2 PE=1 SV=2
7	1	UniProt_human	Q5JP53	3038	47736	121	121	17	17	6.65	Tubulin beta chain OS=Homo sapiens GN=TUBB PE=1 SV=1
8	1	UniProt_human	Q71U36	2909	50104	92	92	16	16	3.2	Tubulin alpha-1A chain OS=Homo sapiens GN=TUBA1A PE=1 SV=1
9	1	UniProt_human	P12004	2895	28750	85	85	14	14	20.48	Proliferating cell nuclear antigen OS=Homo sapiens GN=PCNA PE=1 SV=1
10	1	UniProt_human	Q02978	2660	34040	101	101	15	15	12.37	Mitochondrial 2-oxoglutarate/malate carrier protein OS=Homo sapiens GN=SLC25A11 PE=1 SV=3
7	2	UniProt_human	P68371	2597	49799	99	99	16	16	4.45	Tubulin beta-4B chain OS=Homo sapiens GN=TUBB4B PE=1 SV=1
7	3	UniProt_human	Q9BVA1	2436	49921	89	89	14	14	3.58	Tubulin beta-2B chain OS=Homo sapiens GN=TUBB2B PE=1 SV=1
7	4	UniProt_human	A0A0B4J269	2195	88324	81	81	11	11	0.96	Uncharacterized protein OS=Homo sapiens PE=1 SV=1
11	1	UniProt_human	Q00325	1952	40069	96	96	13	13	6.38	Phosphate carrier protein, mitochondrial OS=Homo sapiens GN=SLC25A3 PE=1 SV=2
12	1	UniProt_human	A0A0A0MRJ6	1924	30296	63	63	11	11	5.97	Protein-L-isoaspartate O-methyltransferase OS=Homo sapiens GN=PCMT1 PE=1 SV=1
13	1	UniProt_human	P53597	1795	36227	60	60	8	8	2.6	Succinate--CoA ligase [ADP/GDP-forming] subunit alpha, mitochondrial OS=Homo sapiens GN=SUCLG1 PE=1 SV=4
14	1	UniProt_human	P04792	1709	22768	66	66	13	13	14.76	Heat shock protein beta-1 OS=Homo sapiens GN=HSPB1 PE=1 SV=2
15	1	UniProt_human	P62258	1688	29155	64	64	15	15	12.32	14-3-3 protein epsilon OS=Homo sapiens GN=YWHAE PE=1 SV=1
16	1	UniProt_human	Q9Y619	1559	32715	54	54	9	9	4.31	Mitochondrial ornithine transporter 1 OS=Homo sapiens GN=SLC25A15 PE=1 SV=1
17	1	UniProt_human	P50402	1554	28976	54	54	12	12	4.69	Emerin OS=Homo sapiens GN=EMD PE=1 SV=1
18	1	UniProt_human	Q07021	1544	31343	51	51	6	6	1.93	Complement component 1 Q subcomponent-binding protein, mitochondrial OS=Homo sapiens GN=C1QBP PE=1 SV=1
19	1	UniProt_human	P40937	1494	38472	56	56	17	17	6.99	Replication factor C subunit 5 OS=Homo sapiens GN=RFC5 PE=1 SV=1
20	1	UniProt_human	A0A0C4DGQ8	1488	33503	43	43	12	12	4.11	Dehydrogenase/reductase SDR family member 7B OS=Homo sapiens GN=DHRS7B PE=1 SV=1
21	1	UniProt_human	P63244	1416	35055	43	43	8	8	1.94	Receptor of activated protein C kinase 1 OS=Homo sapiens GN=RACK1 PE=1 SV=3
7	5	UniProt_human	Q9BUF5	1415	49825	59	59	8	8	1.33	Tubulin beta-6 chain OS=Homo sapiens GN=TUBB6 PE=1 SV=1
4	2	UniProt_human	P02533	1373	51529	40	40	14	14	3.03	Keratin, type I cytoskeletal 14 OS=Homo sapiens GN=KRT14 PE=1 SV=4
22	1	UniProt_human	Q53GQ0	1288	34302	40	40	13	13	3.93	Very-long-chain 3-oxoacyl-CoA reductase OS=Homo sapiens GN=HSD17B12 PE=1 SV=2
23	1	UniProt_human	H0Y368	1254	33308	53	53	12	12	7.56	Dolichol-phosphate mannosyltransferase subunit 1 (Fragment) OS=Homo sapiens GN=DPM1 PE=1 SV=1
24	1	UniProt_human	O75489	1254	30223	35	35	11	11	3.62	NADH dehydrogenase [ubiquinone] iron-sulfur protein 3, mitochondrial OS=Homo sapiens GN=NDUFS3 PE=1 SV=1
25	1	UniProt_human	P61247	1253	29926	44	44	12	12	6.12	40S ribosomal protein S3a OS=Homo sapiens GN=RPS3A PE=1 SV=2
26	1	UniProt_human	M0QXB4	1224	36901	33	33	8	8	1.8	Coatomer protein complex, subunit epsilon, isoform CRA_g OS=Homo sapiens GN=COPE PE=1 SV=1
27	1	UniProt_human	Q9H9B4	1223	35596	46	46	14	14	5.62	Sideroflexin-1 OS=Homo sapiens GN=SFXN1 PE=1 SV=4
28	1	UniProt_human	F8W6I7	1169	33135	35	35	12	12	3.58	Heterogeneous nuclear ribonucleoprotein A1 OS=Homo sapiens GN=HNRNPA1 PE=1 SV=2
29	1	UniProt_human	P05388	1166	34252	38	38	9	9	2.02	60S acidic ribosomal protein P0 OS=Homo sapiens GN=RPLP0 PE=1 SV=1
30	1	UniProt_human	P62424	1158	29977	44	44	12	12	5.19	60S ribosomal protein L7a OS=Homo sapiens GN=RPL7A PE=1 SV=2
29	2	UniProt_human	P05388-2	1145	27418	35	35	9	9	2.96	Isoform 2 of 60S acidic ribosomal protein P0 OS=Homo sapiens GN=RPLP0
31	1	UniProt_human	Q96EY1-2	1143	49580	27	27	10	10	1.34	Isoform 2 of DnaJ homolog subfamily A member 3, mitochondrial OS=Homo sapiens GN=DNAJA3
32	1	UniProt_human	P06748	1113	32555	32	32	8	8	2.2	Nucleophosmin OS=Homo sapiens GN=NPM1 PE=1 SV=2
33	1	UniProt_human	O00165	1108	31601	42	42	12	12	4.63	HCLS1-associated protein X-1 OS=Homo sapiens GN=HAX1 PE=1 SV=2
34	1	UniProt_human	P23396	1107	26671	64	64	15	15	11.42	40S ribosomal protein S3 OS=Homo sapiens GN=RPS3 PE=1 SV=2
35	1	UniProt_human	P08574	1100	35399	54	54	6	6	1.59	Cytochrome c1, heme protein, mitochondrial OS=Homo sapiens GN=CYC1 PE=1 SV=3
36	1	UniProt_human	Q96C36	1062	33616	33	33	8	8	1.72	Pyrroline-5-carboxylate reductase 2 OS=Homo sapiens GN=PYCR2 PE=1 SV=1
37	1	UniProt_human	P13995	1057	37871	30	30	10	10	2.04	Bifunctional methylenetetrahydrofolate dehydrogenase/cyclohydrolase, mitochondrial OS=Homo sapiens GN=MTHFD2 PE=1 SV=2
38	1	UniProt_human	Q16795	1015	42483	42	42	13	13	2.63	NADH dehydrogenase [ubiquinone] 1 alpha subcomplex subunit 9, mitochondrial OS=Homo sapiens GN=NDUFA9 PE=1 SV=2
39	1	UniProt_human	P32322	996	33340	32	32	10	10	2.54	Pyrroline-5-carboxylate reductase 1, mitochondrial OS=Homo sapiens GN=PYCR1 PE=1 SV=2
40	1	UniProt_human	P11908	995	34747	30	30	9	9	2.79	Ribose-phosphate pyrophosphokinase 2 OS=Homo sapiens GN=PRPS2 PE=1 SV=2
41	1	UniProt_human	Q9HB71	983	26194	37	37	9	9	3.96	Calcyclin-binding protein OS=Homo sapiens GN=CACYBP PE=1 SV=2
42	1	UniProt_human	A0A0J9YX62	970	36635	33	33	8	8	1.81	DnaJ homolog subfamily B member 6 OS=Homo sapiens GN=DNAJB6 PE=1 SV=1
43	1	UniProt_human	J3KPX7	969	33219	34	34	12	12	3.58	Prohibitin-2 OS=Homo sapiens GN=PHB2 PE=1 SV=2
3	2	UniProt_human	G3V5T9	956	39153	47	47	14	14	4.59	Cyclin-dependent kinase 2 OS=Homo sapiens GN=CDK2 PE=1 SV=1
44	1	UniProt_human	P11177	946	39208	33	33	10	10	2.26	Pyruvate dehydrogenase E1 component subunit beta, mitochondrial OS=Homo sapiens GN=PDHB PE=1 SV=3
45	1	UniProt_human	P35232	941	29786	31	31	13	13	6.22	Prohibitin OS=Homo sapiens GN=PHB PE=1 SV=1
8	2	UniProt_human	C9J2C0	940	51952	35	35	10	10	1.26	Tubulin alpha chain (Fragment) OS=Homo sapiens GN=TUBA8 PE=1 SV=1
46	1	UniProt_human	Q9Y2S7	937	42007	38	38	10	10	1.73	Polymerase delta-interacting protein 2 OS=Homo sapiens GN=POLDIP2 PE=1 SV=1
47	1	UniProt_human	O14828	920	38262	24	24	9	9	2.01	Secretory carrier-associated membrane protein 3 OS=Homo sapiens GN=SCAMP3 PE=1 SV=3
48	1	UniProt_human	Q96NB2	912	36208	43	43	12	12	3.54	Sideroflexin-2 OS=Homo sapiens GN=SFXN2 PE=1 SV=2
49	1	UniProt_human	P13804	873	35058	28	28	12	12	3.76	Electron transfer flavoprotein subunit alpha, mitochondrial OS=Homo sapiens GN=ETFA PE=1 SV=1
50	1	UniProt_human	Q9Y5M8	857	29684	24	24	8	8	2.11	Signal recognition particle receptor subunit beta OS=Homo sapiens GN=SRPRB PE=1 SV=3
40	2	UniProt_human	P60891	850	34812	23	23	7	7	1.97	Ribose-phosphate pyrophosphokinase 1 OS=Homo sapiens GN=PRPS1 PE=1 SV=2
51	1	UniProt_human	P62701	837	29579	53	53	14	14	10.23	40S ribosomal protein S4, X isoform OS=Homo sapiens GN=RPS4X PE=1 SV=2
52	1	UniProt_human	Q02878	826	32708	41	41	12	12	4.31	60S ribosomal protein L6 OS=Homo sapiens GN=RPL6 PE=1 SV=3
53	1	UniProt_human	Q3ZCQ8	790	39622	25	25	9	9	1.9	Mitochondrial import inner membrane translocase subunit TIM50 OS=Homo sapiens GN=TIMM50 PE=1 SV=2
54	1	UniProt_human	J3QLE5	783	17535	27	27	5	5	2.27	Small nuclear ribonucleoprotein-associated protein N (Fragment) OS=Homo sapiens GN=SNRPN PE=1 SV=1
55	1	UniProt_human	Q8NBM4	783	38938	22	22	8	8	1.65	Ubiquitin-associated domain-containing protein 2 OS=Homo sapiens GN=UBAC2 PE=1 SV=1
28	2	UniProt_human	P22626	778	37407	28	28	10	10	2.45	Heterogeneous nuclear ribonucleoproteins A2/B1 OS=Homo sapiens GN=HNRNPA2B1 PE=1 SV=2
56	1	UniProt_human	P22087	777	33763	31	31	9	9	2.07	rRNA 2'-O-methyltransferase fibrillarin OS=Homo sapiens GN=FBL PE=1 SV=2
4	3	UniProt_human	P08779	755	51236	28	28	12	12	2.17	Keratin, type I cytoskeletal 16 OS=Homo sapiens GN=KRT16 PE=1 SV=4
57	1	UniProt_human	P00387	747	34213	26	26	9	9	2.03	NADH-cytochrome b5 reductase 3 OS=Homo sapiens GN=CYB5R3 PE=1 SV=3
58	1	UniProt_human	Q4VXZ8	743	29465	24	24	11	11	3.81	Peroxisomal 2,4-dienoyl-CoA reductase OS=Homo sapiens GN=DECR2 PE=1 SV=1
15	2	UniProt_human	P63104	726	27728	34	34	12	12	6.14	14-3-3 protein zeta/delta OS=Homo sapiens GN=YWHAZ PE=1 SV=1
59	1	UniProt_human	O43464	724	48811	26	26	11	11	1.59	Serine protease HTRA2, mitochondrial OS=Homo sapiens GN=HTRA2 PE=1 SV=2
60	1	UniProt_human	Q9BZX2	722	29281	28	28	8	8	2.63	Uridine-cytidine kinase 2 OS=Homo sapiens GN=UCK2 PE=1 SV=1
61	1	UniProt_human	D6RCD0	720	28084	25	25	10	10	3.46	Estradiol 17-beta-dehydrogenase 11 OS=Homo sapiens GN=HSD17B11 PE=1 SV=2
62	1	UniProt_human	Q99714	694	26906	21	21	10	10	3.77	3-hydroxyacyl-CoA dehydrogenase type-2 OS=Homo sapiens GN=HSD17B10 PE=1 SV=3
63	1	UniProt_human	P28066	686	26394	26	26	8	8	2.56	Proteasome subunit alpha type-5 OS=Homo sapiens GN=PSMA5 PE=1 SV=3
64	1	UniProt_human	Q9NPL8	682	32158	29	29	16	16	7.09	Complex I assembly factor TIMMDC1, mitochondrial OS=Homo sapiens GN=TIMMDC1 PE=1 SV=2
65	1	UniProt_human	O43809	680	26211	30	30	11	11	4.82	Cleavage and polyadenylation specificity factor subunit 5 OS=Homo sapiens GN=NUDT21 PE=1 SV=1
66	1	UniProt_human	P21796	653	30754	22	22	9	9	2.42	Voltage-dependent anion-selective channel protein 1 OS=Homo sapiens GN=VDAC1 PE=1 SV=2
67	1	UniProt_human	E9PJN0	647	25101	29	29	6	6	1.72	Acyl-coenzyme A thioesterase 8 OS=Homo sapiens GN=ACOT8 PE=1 SV=1
15	3	UniProt_human	P27348	636	27747	30	30	11	11	4.28	14-3-3 protein theta OS=Homo sapiens GN=YWHAQ PE=1 SV=1
68	1	UniProt_human	E9PJH7	620	33261	22	22	6	6	1.42	Mitochondrial glutamate carrier 1 (Fragment) OS=Homo sapiens GN=SLC25A22 PE=1 SV=5
69	1	UniProt_human	Q6P4A7-3	619	24571	18	18	6	6	1.79	Isoform 3 of Sideroflexin-4 OS=Homo sapiens GN=SFXN4
70	1	UniProt_human	H0YN81	605	32233	19	19	8	8	1.84	WD repeat-containing protein 61 (Fragment) OS=Homo sapiens GN=WDR61 PE=1 SV=1
66	2	UniProt_human	Q9Y277	602	30639	21	21	8	8	2	Voltage-dependent anion-selective channel protein 3 OS=Homo sapiens GN=VDAC3 PE=1 SV=1
69	2	UniProt_human	Q6P4A7	598	37974	24	24	8	8	1.43	Sideroflexin-4 OS=Homo sapiens GN=SFXN4 PE=1 SV=1
71	1	UniProt_human	P53007	594	33991	40	40	9	9	3.42	Tricarboxylate transport protein, mitochondrial OS=Homo sapiens GN=SLC25A1 PE=1 SV=2
72	1	UniProt_human	P62714	592	35552	12	12	4	4	1.04	Serine/threonine-protein phosphatase 2A catalytic subunit beta isoform OS=Homo sapiens GN=PPP2CB PE=1 SV=1
73	1	UniProt_human	Q12904	592	34331	24	24	11	11	3.93	Aminoacyl tRNA synthase complex-interacting multifunctional protein 1 OS=Homo sapiens GN=AIMP1 PE=1 SV=2
74	1	UniProt_human	P09661	590	28398	18	18	7	7	1.81	U2 small nuclear ribonucleoprotein A' OS=Homo sapiens GN=SNRPA1 PE=1 SV=2
75	1	UniProt_human	A0A0A0MQS1	581	29874	24	24	7	7	2.08	Pyrroline-5-carboxylate reductase OS=Homo sapiens GN=PYCRL PE=1 SV=1
76	1	UniProt_human	Q13347	580	36479	24	24	9	9	2.17	Eukaryotic translation initiation factor 3 subunit I OS=Homo sapiens GN=EIF3I PE=1 SV=1
6	3	UniProt_human	P48668	573	59988	24	24	12	12	1.5	Keratin, type II cytoskeletal 6C OS=Homo sapiens GN=KRT6C PE=1 SV=3
77	1	UniProt_human	Q9H0E2	573	30262	18	18	6	6	1.3	Toll-interacting protein OS=Homo sapiens GN=TOLLIP PE=1 SV=1
78	1	UniProt_human	Q9BSF4	571	29215	16	16	4	4	0.78	Uncharacterized protein C19orf52 OS=Homo sapiens GN=C19orf52 PE=1 SV=2
79	1	UniProt_human	P45880-1	566	33351	19	19	7	7	1.42	Isoform 1 of Voltage-dependent anion-selective channel protein 2 OS=Homo sapiens GN=VDAC2
80	1	UniProt_human	Q01650	565	54974	14	14	5	5	0.47	Large neutral amino acids transporter small subunit 1 OS=Homo sapiens GN=SLC7A5 PE=1 SV=2
81	1	UniProt_human	Q9NPF4	564	36403	14	14	7	7	1.25	Probable tRNA N6-adenosine threonylcarbamoyltransferase OS=Homo sapiens GN=OSGEP PE=1 SV=1
15	4	UniProt_human	P31946	557	28065	28	28	10	10	4.18	14-3-3 protein beta/alpha OS=Homo sapiens GN=YWHAB PE=1 SV=3
6	4	UniProt_human	P13647	556	62340	27	27	13	13	1.58	Keratin, type II cytoskeletal 5 OS=Homo sapiens GN=KRT5 PE=1 SV=3
82	1	UniProt_human	P36542	553	32975	25	25	9	9	2.15	ATP synthase subunit gamma, mitochondrial OS=Homo sapiens GN=ATP5C1 PE=1 SV=1
83	1	UniProt_human	Q96HS1	546	31985	39	39	11	11	4.53	Serine/threonine-protein phosphatase PGAM5, mitochondrial OS=Homo sapiens GN=PGAM5 PE=1 SV=2
84	1	UniProt_human	P35249	540	39657	14	14	7	7	1.11	Replication factor C subunit 4 OS=Homo sapiens GN=RFC4 PE=1 SV=2
85	1	UniProt_human	E9PB61	539	27541	17	17	7	7	3.59	THO complex subunit 4 OS=Homo sapiens GN=ALYREF PE=1 SV=1
86	1	UniProt_human	P62753	538	28663	20	20	7	7	2.23	40S ribosomal protein S6 OS=Homo sapiens GN=RPS6 PE=1 SV=1
87	1	UniProt_human	Q9Y5Y2	536	28807	12	12	5	5	1.07	Cytosolic Fe-S cluster assembly factor NUBP2 OS=Homo sapiens GN=NUBP2 PE=1 SV=1
88	1	UniProt_human	Q9BQT8	536	33282	25	25	9	9	2.12	Mitochondrial 2-oxodicarboxylate carrier OS=Homo sapiens GN=SLC25A21 PE=1 SV=1
89	1	UniProt_human	O14818	518	27870	22	22	11	11	4.24	Proteasome subunit alpha type-7 OS=Homo sapiens GN=PSMA7 PE=1 SV=1
90	1	UniProt_human	Q5JR95	518	21866	24	24	7	7	3.61	40S ribosomal protein S8 OS=Homo sapiens GN=RPS8 PE=1 SV=1
91	1	UniProt_human	P00491	514	32097	16	16	7	7	1.85	Purine nucleoside phosphorylase OS=Homo sapiens GN=PNP PE=1 SV=2
92	1	UniProt_human	O00487	511	34555	23	23	8	8	1.65	26S proteasome non-ATPase regulatory subunit 14 OS=Homo sapiens GN=PSMD14 PE=1 SV=1
93	1	UniProt_human	Q9Y224	497	28051	14	14	6	6	1.45	UPF0568 protein C14orf166 OS=Homo sapiens GN=C14orf166 PE=1 SV=1
94	1	UniProt_human	Q9UBX3	496	31262	23	23	9	9	3.38	Mitochondrial dicarboxylate carrier OS=Homo sapiens GN=SLC25A10 PE=1 SV=2
95	1	UniProt_human	A0A1B0GVB9	493	35462	15	15	8	8	1.59	Renin receptor OS=Homo sapiens GN=ATP6AP2 PE=4 SV=1
96	1	UniProt_human	K7ES61	492	33771	14	14	5	5	0.87	39S ribosomal protein L4, mitochondrial (Fragment) OS=Homo sapiens GN=MRPL4 PE=1 SV=1
97	1	UniProt_human	Q5VTE0	491	50153	21	21	7	7	0.96	Putative elongation factor 1-alpha-like 3 OS=Homo sapiens GN=EEF1A1P5 PE=5 SV=1
98	1	UniProt_human	O00767	491	41496	10	10	4	4	0.5	Acyl-CoA desaturase OS=Homo sapiens GN=SCD PE=1 SV=2
99	1	UniProt_human	P24534	484	24748	14	14	5	5	1.76	Elongation factor 1-beta OS=Homo sapiens GN=EEF1B2 PE=1 SV=3
100	1	UniProt_human	P26373	474	24247	24	24	6	6	2.36	60S ribosomal protein L13 OS=Homo sapiens GN=RPL13 PE=1 SV=4
101	1	UniProt_human	P52907	474	32902	19	19	8	8	1.78	F-actin-capping protein subunit alpha-1 OS=Homo sapiens GN=CAPZA1 PE=1 SV=3
102	1	UniProt_human	Q9NZ01	470	36011	21	21	7	7	1.27	Very-long-chain enoyl-CoA reductase OS=Homo sapiens GN=TECR PE=1 SV=1
103	1	UniProt_human	Q9BXW7	465	46292	15	15	6	6	0.73	Cat eye syndrome critical region protein 5 OS=Homo sapiens GN=CECR5 PE=1 SV=1
104	1	UniProt_human	Q8TB37	464	34061	19	19	6	6	1.1	Iron-sulfur protein NUBPL OS=Homo sapiens GN=NUBPL PE=1 SV=3
105	1	UniProt_human	Q9NWU2	461	26732	11	11	8	8	3.1	Glucose-induced degradation protein 8 homolog OS=Homo sapiens GN=GID8 PE=1 SV=1
106	1	UniProt_human	B4DR61	453	52915	18	18	7	7	0.75	Protein transport protein Sec61 subunit alpha isoform 1 OS=Homo sapiens GN=SEC61A1 PE=1 SV=1
107	1	UniProt_human	Q96GD4-2	453	35279	17	17	7	7	1.3	Isoform 2 of Aurora kinase B OS=Homo sapiens GN=AURKB
108	1	UniProt_human	P46777	450	34341	31	31	8	8	2.02	60S ribosomal protein L5 OS=Homo sapiens GN=RPL5 PE=1 SV=3
109	1	UniProt_human	O43819	449	29791	19	19	8	8	2.09	Protein SCO2 homolog, mitochondrial OS=Homo sapiens GN=SCO2 PE=1 SV=3
110	1	UniProt_human	P62917	449	28007	25	25	8	8	2.86	60S ribosomal protein L8 OS=Homo sapiens GN=RPL8 PE=1 SV=2
111	1	UniProt_human	P09601	446	32798	17	17	7	7	1.46	Heme oxygenase 1 OS=Homo sapiens GN=HMOX1 PE=1 SV=1
15	5	UniProt_human	P61981	441	28285	21	21	9	9	3.41	14-3-3 protein gamma OS=Homo sapiens GN=YWHAG PE=1 SV=2
112	1	UniProt_human	P15880	434	31305	25	25	11	11	4.01	40S ribosomal protein S2 OS=Homo sapiens GN=RPS2 PE=1 SV=2
113	1	UniProt_human	Q9NTX5	433	33677	12	12	6	6	1.12	Ethylmalonyl-CoA decarboxylase OS=Homo sapiens GN=ECHDC1 PE=1 SV=2
114	1	UniProt_human	P56962	428	33383	11	11	6	6	1.13	Syntaxin-17 OS=Homo sapiens GN=STX17 PE=1 SV=2
115	1	UniProt_human	A0A0C4DGB6	426	69181	12	12	3	3	0.2	Serum albumin OS=Homo sapiens GN=ALB PE=1 SV=1
116	1	UniProt_human	Q13868	421	32768	11	11	7	7	1.46	Exosome complex component RRP4 OS=Homo sapiens GN=EXOSC2 PE=1 SV=2
27	2	UniProt_human	A0A0A0MS41	416	35481	13	13	9	9	1.91	Sideroflexin OS=Homo sapiens GN=SFXN3 PE=1 SV=1
117	1	UniProt_human	O00743	415	35121	14	14	6	6	1.05	Serine/threonine-protein phosphatase 6 catalytic subunit OS=Homo sapiens GN=PPP6C PE=1 SV=1
118	1	UniProt_human	Q7KZN9	414	46000	15	15	6	6	0.74	Cytochrome c oxidase assembly protein COX15 homolog OS=Homo sapiens GN=COX15 PE=1 SV=1
119	1	UniProt_human	P11142	411	70854	15	15	8	8	0.61	Heat shock cognate 71 kDa protein OS=Homo sapiens GN=HSPA8 PE=1 SV=1
120	1	UniProt_human	Q9H2D1	410	35385	13	13	8	8	1.59	Mitochondrial folate transporter/carrier OS=Homo sapiens GN=SLC25A32 PE=1 SV=2
121	1	UniProt_human	P60709	409	41710	13	13	8	8	1.24	Actin, cytoplasmic 1 OS=Homo sapiens GN=ACTB PE=1 SV=1
122	1	UniProt_human	P07195	407	36615	19	19	10	10	2.16	L-lactate dehydrogenase B chain OS=Homo sapiens GN=LDHB PE=1 SV=2
123	1	UniProt_human	H0YHA7	399	18962	8	8	4	4	1.41	60S ribosomal protein L18 (Fragment) OS=Homo sapiens GN=RPL18 PE=1 SV=1
124	1	UniProt_human	Q15773	397	28129	10	10	3	3	0.57	Myeloid leukemia factor 2 OS=Homo sapiens GN=MLF2 PE=1 SV=1
125	1	UniProt_human	P48729	396	38890	23	23	7	7	1.14	Casein kinase I isoform alpha OS=Homo sapiens GN=CSNK1A1 PE=1 SV=2
126	1	UniProt_human	Q8TDX7	392	34528	20	20	8	8	1.65	Serine/threonine-protein kinase Nek7 OS=Homo sapiens GN=NEK7 PE=1 SV=1
127	1	UniProt_human	P62906	383	24816	31	31	8	8	4.39	60S ribosomal protein L10a OS=Homo sapiens GN=RPL10A PE=1 SV=2
128	1	UniProt_human	O43709	382	31860	14	14	5	5	0.93	Probable 18S rRNA (guanine-N(7))-methyltransferase OS=Homo sapiens GN=WBSCR22 PE=1 SV=2
129	1	UniProt_human	Q9NXK8	379	37002	11	11	4	4	0.58	F-box/LRR-repeat protein 12 OS=Homo sapiens GN=FBXL12 PE=1 SV=1
99	2	UniProt_human	A0A087X1X7	376	69240	13	13	8	8	0.63	Elongation factor 1-delta OS=Homo sapiens GN=EEF1D PE=1 SV=1
130	1	UniProt_human	Q9UG56	376	46642	12	12	7	7	0.88	Phosphatidylserine decarboxylase proenzyme, mitochondrial OS=Homo sapiens GN=PISD PE=2 SV=4
131	1	UniProt_human	A0A087WYF7	375	29186	14	14	7	7	1.74	MICOS complex subunit OS=Homo sapiens GN=APOOL PE=1 SV=1
122	2	UniProt_human	P00338	370	36665	20	20	11	11	2.54	L-lactate dehydrogenase A chain OS=Homo sapiens GN=LDHA PE=1 SV=2
132	1	UniProt_human	O43615	367	51323	11	11	6	6	0.64	Mitochondrial import inner membrane translocase subunit TIM44 OS=Homo sapiens GN=TIMM44 PE=1 SV=2
133	1	UniProt_human	F8WAR4	367	27718	13	13	7	7	1.88	MICOS complex subunit OS=Homo sapiens GN=CHCHD3 PE=1 SV=1
134	1	UniProt_human	P46821	367	270468	14	14	4	4	0.06	Microtubule-associated protein 1B OS=Homo sapiens GN=MAP1B PE=1 SV=2
15	6	UniProt_human	Q04917	366	28201	16	16	6	6	1.84	14-3-3 protein eta OS=Homo sapiens GN=YWHAH PE=1 SV=4
135	1	UniProt_human	Q9UNQ2	366	35214	18	18	10	10	2.31	Probable dimethyladenosine transferase OS=Homo sapiens GN=DIMT1 PE=1 SV=1
136	1	UniProt_human	Q13155	365	35326	14	14	5	5	0.82	Aminoacyl tRNA synthase complex-interacting multifunctional protein 2 OS=Homo sapiens GN=AIMP2 PE=1 SV=2
137	1	UniProt_human	Q8NE86	365	39842	19	19	9	9	1.59	Calcium uniporter protein, mitochondrial OS=Homo sapiens GN=MCU PE=1 SV=1
138	1	UniProt_human	Q5VWZ2	361	26299	15	15	6	6	1.6	Lysophospholipase-like protein 1 OS=Homo sapiens GN=LYPLAL1 PE=1 SV=3
139	1	UniProt_human	P18124	360	29207	26	26	11	11	4.62	60S ribosomal protein L7 OS=Homo sapiens GN=RPL7 PE=1 SV=1
140	1	UniProt_human	Q13011	360	35793	7	7	5	5	0.8	Delta(3,5)-Delta(2,4)-dienoyl-CoA isomerase, mitochondrial OS=Homo sapiens GN=ECH1 PE=1 SV=2
4	4	UniProt_human	Q7Z3Y7	354	50536	15	15	5	5	0.95	Keratin, type I cytoskeletal 28 OS=Homo sapiens GN=KRT28 PE=1 SV=2
141	1	UniProt_human	E9PMD7	349	28879	15	15	7	7	1.77	Serine/threonine-protein phosphatase (Fragment) OS=Homo sapiens GN=PPP1CA PE=1 SV=1
142	1	UniProt_human	Q8NBU5	347	40718	14	14	7	7	1.06	ATPase family AAA domain-containing protein 1 OS=Homo sapiens GN=ATAD1 PE=1 SV=1
143	1	UniProt_human	Q9BPW8	346	33289	18	18	4	4	1.13	Protein NipSnap homolog 1 OS=Homo sapiens GN=NIPSNAP1 PE=1 SV=1
144	1	UniProt_human	H0Y2Y8	343	57606	13	13	5	5	0.44	Zyxin (Fragment) OS=Homo sapiens GN=ZYX PE=1 SV=1
141	2	UniProt_human	P62140	342	37163	14	14	6	6	0.97	Serine/threonine-protein phosphatase PP1-beta catalytic subunit OS=Homo sapiens GN=PPP1CB PE=1 SV=3
145	1	UniProt_human	Q15717	339	36069	13	13	8	8	1.54	ELAV-like protein 1 OS=Homo sapiens GN=ELAVL1 PE=1 SV=2
146	1	UniProt_human	Q9BSK2	334	35352	13	13	5	5	0.82	Solute carrier family 25 member 33 OS=Homo sapiens GN=SLC25A33 PE=1 SV=1
147	1	UniProt_human	F2Z2Y4	329	30619	4	4	2	2	0.32	Pyridoxal kinase OS=Homo sapiens GN=PDXK PE=1 SV=1
3	3	UniProt_human	F8VTV8	327	22009	15	15	5	5	1.59	Cyclin-dependent kinase 4 OS=Homo sapiens GN=CDK4 PE=1 SV=1
148	1	UniProt_human	P25705	324	59714	7	7	6	6	0.53	ATP synthase subunit alpha, mitochondrial OS=Homo sapiens GN=ATP5A1 PE=1 SV=1
149	1	UniProt_human	G3V5Z7	324	28129	12	12	6	6	1.45	Proteasome subunit alpha type OS=Homo sapiens GN=PSMA6 PE=1 SV=1
150	1	UniProt_human	P56537	323	26582	7	7	3	3	0.61	Eukaryotic translation initiation factor 6 OS=Homo sapiens GN=EIF6 PE=1 SV=1
151	1	UniProt_human	Q5RKV6	318	28218	8	8	4	4	0.81	Exosome complex component MTR3 OS=Homo sapiens GN=EXOSC6 PE=1 SV=1
152	1	UniProt_human	H3BRU6	314	31691	13	13	7	7	1.53	Poly(rC)-binding protein 2 (Fragment) OS=Homo sapiens GN=PCBP2 PE=1 SV=1
153	1	UniProt_human	Q6UXN9	312	35056	8	8	3	3	0.62	WD repeat-containing protein 82 OS=Homo sapiens GN=WDR82 PE=1 SV=1
154	1	UniProt_human	C9JG87	310	34010	12	12	5	5	0.86	39S ribosomal protein L39, mitochondrial (Fragment) OS=Homo sapiens GN=MRPL39 PE=1 SV=1
4	5	UniProt_human	F5GWP8	309	40262	12	12	6	6	0.87	Keratin, type I cytoskeletal 17 OS=Homo sapiens GN=KRT17 PE=1 SV=2
141	3	UniProt_human	F8VYE8	308	34927	12	12	5	5	0.83	Serine/threonine-protein phosphatase OS=Homo sapiens GN=PPP1CC PE=1 SV=1
155	1	UniProt_human	P21912	305	31609	11	11	5	5	0.94	Succinate dehydrogenase [ubiquinone] iron-sulfur subunit, mitochondrial OS=Homo sapiens GN=SDHB PE=1 SV=3
156	1	UniProt_human	H0YHX9	305	22930	8	8	3	3	0.73	Nascent polypeptide-associated complex subunit alpha (Fragment) OS=Homo sapiens GN=NACA PE=1 SV=1
157	1	UniProt_human	E7EPB3	301	14549	8	8	2	2	0.77	60S ribosomal protein L14 OS=Homo sapiens GN=RPL14 PE=1 SV=1
158	1	UniProt_human	P43307	300	32215	18	18	4	4	0.69	Translocon-associated protein subunit alpha OS=Homo sapiens GN=SSR1 PE=1 SV=3
159	1	UniProt_human	A0A0A0MRK6	296	51431	11	11	7	7	0.78	Metaxin 1, isoform CRA_b OS=Homo sapiens GN=MTX1 PE=1 SV=1
160	1	UniProt_human	Q7L8W6	296	30287	15	15	9	9	2.48	Diphthine--ammonia ligase OS=Homo sapiens GN=DPH6 PE=1 SV=3
161	1	UniProt_human	P25788	295	28415	12	12	5	5	1.43	Proteasome subunit alpha type-3 OS=Homo sapiens GN=PSMA3 PE=1 SV=2
162	1	UniProt_human	Q9NRX1	295	27907	8	8	4	4	0.83	RNA-binding protein PNO1 OS=Homo sapiens GN=PNO1 PE=1 SV=1
163	1	UniProt_human	P25786	293	29537	20	20	8	8	2.12	Proteasome subunit alpha type-1 OS=Homo sapiens GN=PSMA1 PE=1 SV=1
164	1	UniProt_human	P78346	293	29303	16	16	10	10	3.84	Ribonuclease P protein subunit p30 OS=Homo sapiens GN=RPP30 PE=1 SV=1
165	1	UniProt_human	Q9BU02	292	25550	9	9	5	5	1.27	Thiamine-triphosphatase OS=Homo sapiens GN=THTPA PE=1 SV=3
166	1	UniProt_human	Q5BJH7	288	34413	7	7	3	3	0.44	Protein YIF1B OS=Homo sapiens GN=YIF1B PE=1 SV=1
167	1	UniProt_human	O95292	288	27211	9	9	3	3	0.59	Vesicle-associated membrane protein-associated protein B/C OS=Homo sapiens GN=VAPB PE=1 SV=3
168	1	UniProt_human	U3KQK0	287	18792	8	8	3	3	0.95	Histone H2B OS=Homo sapiens GN=HIST1H2BN PE=1 SV=1
169	1	UniProt_human	Q9H7Z7	280	41917	9	9	5	5	0.65	Prostaglandin E synthase 2 OS=Homo sapiens GN=PTGES2 PE=1 SV=1
170	1	UniProt_human	Q96AG4	277	34909	13	13	6	6	1.06	Leucine-rich repeat-containing protein 59 OS=Homo sapiens GN=LRRC59 PE=1 SV=1
171	1	UniProt_human	O75822	277	29045	11	11	4	4	0.78	Eukaryotic translation initiation factor 3 subunit J OS=Homo sapiens GN=EIF3J PE=1 SV=2
172	1	UniProt_human	Q96CT7	275	25820	9	9	5	5	1.25	Coiled-coil domain-containing protein 124 OS=Homo sapiens GN=CCDC124 PE=1 SV=1
173	1	UniProt_human	P05198	274	36089	13	13	6	6	1.01	Eukaryotic translation initiation factor 2 subunit 1 OS=Homo sapiens GN=EIF2S1 PE=1 SV=3
174	1	UniProt_human	A0A0A0MSG2	270	44808	17	17	3	3	0.46	Four and a half LIM domains protein 2 OS=Homo sapiens GN=FHL2 PE=1 SV=1
175	1	UniProt_human	Q969X5	269	32571	14	14	6	6	1.17	Endoplasmic reticulum-Golgi intermediate compartment protein 1 OS=Homo sapiens GN=ERGIC1 PE=1 SV=1
176	1	UniProt_human	Q9HC21	268	35488	22	22	12	12	3.15	Mitochondrial thiamine pyrophosphate carrier OS=Homo sapiens GN=SLC25A19 PE=1 SV=1
177	1	UniProt_human	Q9NUQ2	268	42045	6	6	4	4	0.49	1-acyl-sn-glycerol-3-phosphate acyltransferase epsilon OS=Homo sapiens GN=AGPAT5 PE=1 SV=3
178	1	UniProt_human	Q9P035	262	43132	9	9	5	5	0.63	Very-long-chain (3R)-3-hydroxyacyl-CoA dehydratase 3 OS=Homo sapiens GN=HACD3 PE=1 SV=2
179	1	UniProt_human	Q13643	258	31171	13	13	4	4	0.71	Four and a half LIM domains protein 3 OS=Homo sapiens GN=FHL3 PE=1 SV=4
180	1	UniProt_human	Q5JPI3	257	37517	6	6	5	5	0.75	Uncharacterized protein C3orf38 OS=Homo sapiens GN=C3orf38 PE=1 SV=1
181	1	UniProt_human	P00492	255	24564	12	12	7	7	2.3	Hypoxanthine-guanine phosphoribosyltransferase OS=Homo sapiens GN=HPRT1 PE=1 SV=2
28	3	UniProt_human	Q13151	253	30822	9	9	4	4	0.72	Heterogeneous nuclear ribonucleoprotein A0 OS=Homo sapiens GN=HNRNPA0 PE=1 SV=1
182	1	UniProt_human	P54619	253	37556	12	12	8	8	1.46	5'-AMP-activated protein kinase subunit gamma-1 OS=Homo sapiens GN=PRKAG1 PE=1 SV=1
183	1	UniProt_human	G3XAN4	249	33414	9	9	4	4	1.13	Translocating chain-associated membrane protein 1 OS=Homo sapiens GN=TRAM1 PE=1 SV=1
184	1	UniProt_human	P46736	248	36049	11	11	5	5	0.79	Lys-63-specific deubiquitinase BRCC36 OS=Homo sapiens GN=BRCC3 PE=1 SV=2
106	2	UniProt_human	F8W776	247	44720	9	9	4	4	0.46	Protein transport protein Sec61 subunit alpha isoform 2 OS=Homo sapiens GN=SEC61A2 PE=1 SV=1
185	1	UniProt_human	P08579	246	25470	6	6	4	4	0.93	U2 small nuclear ribonucleoprotein B'' OS=Homo sapiens GN=SNRPB2 PE=1 SV=1
186	1	UniProt_human	Q96B26	246	30020	4	4	3	3	0.52	Exosome complex component RRP43 OS=Homo sapiens GN=EXOSC8 PE=1 SV=1
187	1	UniProt_human	Q99598	246	33092	8	8	6	6	1.14	Translin-associated protein X OS=Homo sapiens GN=TSNAX PE=1 SV=1
188	1	UniProt_human	P20618	244	26472	8	8	6	6	1.59	Proteasome subunit beta type-1 OS=Homo sapiens GN=PSMB1 PE=1 SV=2
189	1	UniProt_human	Q15006	243	34811	6	6	5	5	0.83	ER membrane protein complex subunit 2 OS=Homo sapiens GN=EMC2 PE=1 SV=1
190	1	UniProt_human	P09496-2	241	23647	10	10	5	5	1.89	Isoform Non-brain of Clathrin light chain A OS=Homo sapiens GN=CLTA
167	2	UniProt_human	Q9P0L0	240	27875	10	10	6	6	1.47	Vesicle-associated membrane protein-associated protein A OS=Homo sapiens GN=VAPA PE=1 SV=3
191	1	UniProt_human	Q969Y2-4	240	54406	8	8	5	5	0.47	Isoform 4 of tRNA modification GTPase GTPBP3, mitochondrial OS=Homo sapiens GN=GTPBP3
192	1	UniProt_human	Q9UH62	236	42474	6	6	5	5	0.64	Armadillo repeat-containing X-linked protein 3 OS=Homo sapiens GN=ARMCX3 PE=1 SV=1
193	1	UniProt_human	F6SL11	236	32429	13	13	9	9	2.21	Brain mitochondrial carrier protein 1 OS=Homo sapiens GN=SLC25A14 PE=1 SV=1
126	2	UniProt_human	Q5TBG7	235	24776	10	10	4	4	0.97	Serine/threonine-protein kinase Nek6 (Fragment) OS=Homo sapiens GN=NEK6 PE=1 SV=1
194	1	UniProt_human	Q53S58	234	33739	10	10	5	5	0.87	Transmembrane protein 177 OS=Homo sapiens GN=TMEM177 PE=2 SV=1
195	1	UniProt_human	E5RIL2	232	25913	7	7	4	4	0.91	CCR4-NOT transcription complex subunit 8 (Fragment) OS=Homo sapiens GN=CNOT8 PE=1 SV=1
196	1	UniProt_human	P30041	232	25019	11	11	7	7	2.24	Peroxiredoxin-6 OS=Homo sapiens GN=PRDX6 PE=1 SV=3
197	1	UniProt_human	Q9UNE7	232	34834	11	11	7	7	1.33	E3 ubiquitin-protein ligase CHIP OS=Homo sapiens GN=STUB1 PE=1 SV=2
146	2	UniProt_human	Q96CQ1	231	34261	6	6	2	2	0.28	Solute carrier family 25 member 36 OS=Homo sapiens GN=SLC25A36 PE=1 SV=1
198	1	UniProt_human	J3QTA6	231	28800	7	7	4	4	0.79	MICOS complex subunit OS=Homo sapiens GN=CHCHD6 PE=1 SV=1
101	2	UniProt_human	P47755	230	32929	10	10	6	6	1.15	F-actin-capping protein subunit alpha-2 OS=Homo sapiens GN=CAPZA2 PE=1 SV=3
199	1	UniProt_human	P06576	228	56525	9	9	7	7	0.69	ATP synthase subunit beta, mitochondrial OS=Homo sapiens GN=ATP5B PE=1 SV=3
200	1	UniProt_human	Q9NUJ1	228	33911	6	6	4	4	0.64	Mycophenolic acid acyl-glucuronide esterase, mitochondrial OS=Homo sapiens GN=ABHD10 PE=1 SV=1
201	1	UniProt_human	P47985	228	29649	8	8	5	5	1.34	Cytochrome b-c1 complex subunit Rieske, mitochondrial OS=Homo sapiens GN=UQCRFS1 PE=1 SV=2
202	1	UniProt_human	P01616	227	12048	6	6	2	2	0.98	Ig kappa chain V-II region MIL OS=Homo sapiens PE=1 SV=1
203	1	UniProt_human	P48507	227	30708	6	6	4	4	0.73	Glutamate--cysteine ligase regulatory subunit OS=Homo sapiens GN=GCLM PE=1 SV=1
204	1	UniProt_human	Q9BU76	227	29394	10	10	6	6	1.36	Multiple myeloma tumor-associated protein 2 OS=Homo sapiens GN=MMTAG2 PE=1 SV=1
205	1	UniProt_human	Q5HYK3	226	37117	10	10	6	6	0.98	2-methoxy-6-polyprenyl-1,4-benzoquinol methylase, mitochondrial OS=Homo sapiens GN=COQ5 PE=1 SV=2
206	1	UniProt_human	P01605	226	11827	7	7	2	2	1	Ig kappa chain V-I region Lay OS=Homo sapiens PE=1 SV=1
207	1	UniProt_human	J3KP15	225	15362	8	8	3	3	1.25	Serine/arginine-rich-splicing factor 2 (Fragment) OS=Homo sapiens GN=SRSF2 PE=1 SV=8
208	1	UniProt_human	Q9NZJ7	225	41517	11	11	6	6	0.84	Mitochondrial carrier homolog 1 OS=Homo sapiens GN=MTCH1 PE=1 SV=1
209	1	UniProt_human	P49411	225	49510	9	9	7	7	0.82	Elongation factor Tu, mitochondrial OS=Homo sapiens GN=TUFM PE=1 SV=2
210	1	UniProt_human	E7EQB3	223	34297	10	10	6	6	1.09	tRNA-splicing endonuclease subunit Sen34 OS=Homo sapiens GN=TSEN34 PE=1 SV=2
211	1	UniProt_human	Q9BTZ2	222	29518	7	7	5	5	1.04	Dehydrogenase/reductase SDR family member 4 OS=Homo sapiens GN=DHRS4 PE=1 SV=3
212	1	UniProt_human	O60921	219	31670	8	8	5	5	0.94	Checkpoint protein HUS1 OS=Homo sapiens GN=HUS1 PE=1 SV=1
213	1	UniProt_human	O43347	217	39099	7	7	5	5	0.71	RNA-binding protein Musashi homolog 1 OS=Homo sapiens GN=MSI1 PE=1 SV=1
214	1	UniProt_human	P10809	217	61016	7	7	6	6	0.52	60 kDa heat shock protein, mitochondrial OS=Homo sapiens GN=HSPD1 PE=1 SV=2
215	1	UniProt_human	P19387	216	31422	9	9	6	6	1.23	DNA-directed RNA polymerase II subunit RPB3 OS=Homo sapiens GN=POLR2C PE=1 SV=2
216	1	UniProt_human	J3KTL2	216	28312	10	10	4	4	0.81	Serine/arginine-rich-splicing factor 1 OS=Homo sapiens GN=SRSF1 PE=1 SV=1
217	1	UniProt_human	Q0PNE2-2	214	27549	7	7	5	5	1.14	Isoform 2 of Elongator complex protein 6 OS=Homo sapiens GN=ELP6
218	1	UniProt_human	P40926	212	35481	7	7	4	4	0.61	Malate dehydrogenase, mitochondrial OS=Homo sapiens GN=MDH2 PE=1 SV=3
219	1	UniProt_human	Q9NZ63	211	33667	8	8	6	6	1.4	Uncharacterized protein C9orf78 OS=Homo sapiens GN=C9orf78 PE=1 SV=1
220	1	UniProt_human	G8JLB6	210	51197	9	9	5	5	0.51	Heterogeneous nuclear ribonucleoprotein H OS=Homo sapiens GN=HNRNPH1 PE=1 SV=1
221	1	UniProt_human	P27105	208	31711	9	9	5	5	0.94	Erythrocyte band 7 integral membrane protein OS=Homo sapiens GN=STOM PE=1 SV=3
193	2	UniProt_human	Q5SVS4	205	32454	15	15	8	8	1.82	Kidney mitochondrial carrier protein 1 OS=Homo sapiens GN=SLC25A30 PE=1 SV=1
222	1	UniProt_human	Q15056	205	27368	7	7	4	4	0.84	Eukaryotic translation initiation factor 4H OS=Homo sapiens GN=EIF4H PE=1 SV=5
223	1	UniProt_human	O43772	205	32922	14	14	9	9	2.15	Mitochondrial carnitine/acylcarnitine carrier protein OS=Homo sapiens GN=SLC25A20 PE=1 SV=1
224	1	UniProt_human	Q8N8R3	205	32042	9	9	5	5	0.93	Mitochondrial basic amino acids transporter OS=Homo sapiens GN=SLC25A29 PE=1 SV=2
28	4	UniProt_human	P51991	204	39571	5	5	3	3	0.38	Heterogeneous nuclear ribonucleoprotein A3 OS=Homo sapiens GN=HNRNPA3 PE=1 SV=2
225	1	UniProt_human	Q9HC07	203	34883	4	4	3	3	0.44	Transmembrane protein 165 OS=Homo sapiens GN=TMEM165 PE=1 SV=1
226	1	UniProt_human	Q13442	201	20618	5	5	3	3	0.83	28 kDa heat- and acid-stable phosphoprotein OS=Homo sapiens GN=PDAP1 PE=1 SV=1
227	1	UniProt_human	P50454	199	46411	3	3	2	2	0.2	Serpin H1 OS=Homo sapiens GN=SERPINH1 PE=1 SV=2
228	1	UniProt_human	P30084	198	31367	5	5	3	3	0.49	Enoyl-CoA hydratase, mitochondrial OS=Homo sapiens GN=ECHS1 PE=1 SV=4
229	1	UniProt_human	Q9UKU7	197	45040	5	5	3	3	0.32	Isobutyryl-CoA dehydrogenase, mitochondrial OS=Homo sapiens GN=ACAD8 PE=1 SV=1
230	1	UniProt_human	O15127	197	36625	5	5	2	2	0.26	Secretory carrier-associated membrane protein 2 OS=Homo sapiens GN=SCAMP2 PE=1 SV=2
231	1	UniProt_human	Q02413	197	113676	3	3	2	2	0.08	Desmoglein-1 OS=Homo sapiens GN=DSG1 PE=1 SV=2
42	2	UniProt_human	C9JRD2	196	25395	4	4	3	3	0.64	DnaJ homolog subfamily B member 2 (Fragment) OS=Homo sapiens GN=DNAJB2 PE=1 SV=1
232	1	UniProt_human	Q9NPD3	196	26366	6	6	3	3	0.61	Exosome complex component RRP41 OS=Homo sapiens GN=EXOSC4 PE=1 SV=3
233	1	UniProt_human	P38117	196	27826	12	12	8	8	2.34	Electron transfer flavoprotein subunit beta OS=Homo sapiens GN=ETFB PE=1 SV=3
234	1	UniProt_human	F5GYQ1	194	44631	7	7	4	4	0.46	V-type proton ATPase subunit d 1 OS=Homo sapiens GN=ATP6V0D1 PE=1 SV=1
235	1	UniProt_human	Q9H7B2	194	35560	4	4	3	3	0.43	Ribosome production factor 2 homolog OS=Homo sapiens GN=RPF2 PE=1 SV=2
236	1	UniProt_human	P28070	193	29185	5	5	4	4	0.78	Proteasome subunit beta type-4 OS=Homo sapiens GN=PSMB4 PE=1 SV=4
237	1	UniProt_human	O15173	193	23804	4	4	2	2	0.42	Membrane-associated progesterone receptor component 2 OS=Homo sapiens GN=PGRMC2 PE=1 SV=1
238	1	UniProt_human	Q9UBV8	193	30361	5	5	2	2	0.32	Peflin OS=Homo sapiens GN=PEF1 PE=1 SV=1
239	1	UniProt_human	Q8TBP6	192	38100	8	8	5	5	0.74	Solute carrier family 25 member 40 OS=Homo sapiens GN=SLC25A40 PE=1 SV=1
185	2	UniProt_human	P09012	191	31259	9	9	5	5	0.96	U1 small nuclear ribonucleoprotein A OS=Homo sapiens GN=SNRPA PE=1 SV=3
240	1	UniProt_human	B0QYW5	191	25705	8	8	4	4	0.92	Peroxisomal membrane protein PMP34 OS=Homo sapiens GN=SLC25A17 PE=1 SV=1
241	1	UniProt_human	Q9UIV1	190	32724	7	7	5	5	0.9	CCR4-NOT transcription complex subunit 7 OS=Homo sapiens GN=CNOT7 PE=1 SV=3
242	1	UniProt_human	P53611	190	36900	9	9	6	6	0.99	Geranylgeranyl transferase type-2 subunit beta OS=Homo sapiens GN=RABGGTB PE=1 SV=2
243	1	UniProt_human	Q9NQT5	189	29553	6	6	3	3	0.53	Exosome complex component RRP40 OS=Homo sapiens GN=EXOSC3 PE=1 SV=3
244	1	UniProt_human	P07355	189	38580	8	8	6	6	0.92	Annexin A2 OS=Homo sapiens GN=ANXA2 PE=1 SV=2
245	1	UniProt_human	P19784	188	41187	6	6	5	5	0.67	Casein kinase II subunit alpha' OS=Homo sapiens GN=CSNK2A2 PE=1 SV=1
246	1	UniProt_human	Q9NQX7-2	186	24940	6	6	4	4	0.96	Isoform 2 of Integral membrane protein 2C OS=Homo sapiens GN=ITM2C
247	1	UniProt_human	P07996	185	129300	5	5	4	4	0.14	Thrombospondin-1 OS=Homo sapiens GN=THBS1 PE=1 SV=2
248	1	UniProt_human	H3BRG4	185	44607	5	5	3	3	0.33	Cytochrome b-c1 complex subunit 2, mitochondrial OS=Homo sapiens GN=UQCRC2 PE=1 SV=1
249	1	UniProt_human	P47914	184	17741	5	5	1	1	0.26	60S ribosomal protein L29 OS=Homo sapiens GN=RPL29 PE=1 SV=2
250	1	UniProt_human	Q9H9J2	181	37512	6	6	5	5	0.75	39S ribosomal protein L44, mitochondrial OS=Homo sapiens GN=MRPL44 PE=1 SV=1
251	1	UniProt_human	Q5TEJ7	179	19421	8	8	4	4	1.36	Replication protein A 32 kDa subunit (Fragment) OS=Homo sapiens GN=RPA2 PE=1 SV=1
252	1	UniProt_human	P31153	178	43633	4	4	3	3	0.34	S-adenosylmethionine synthase isoform type-2 OS=Homo sapiens GN=MAT2A PE=1 SV=1
253	1	UniProt_human	H0YL69	177	26360	11	11	4	4	0.89	Proteasome subunit alpha type (Fragment) OS=Homo sapiens GN=PSMA4 PE=1 SV=1
119	2	UniProt_human	A0A0G2JIW1	175	70066	4	4	3	3	0.2	Heat shock 70 kDa protein 1B OS=Homo sapiens GN=HSPA1B PE=1 SV=1
254	1	UniProt_human	P49406	175	33514	10	10	6	6	1.12	39S ribosomal protein L19, mitochondrial OS=Homo sapiens GN=MRPL19 PE=1 SV=2
255	1	UniProt_human	Q96DW6	174	33544	4	4	3	3	0.46	Solute carrier family 25 member 38 OS=Homo sapiens GN=SLC25A38 PE=1 SV=1
256	1	UniProt_human	Q6NTF9	173	39177	3	3	2	2	0.24	Rhomboid domain-containing protein 2 OS=Homo sapiens GN=RHBDD2 PE=2 SV=2
257	1	UniProt_human	Q5T196	172	50110	3	3	3	3	0.29	FAD synthase OS=Homo sapiens GN=FLAD1 PE=1 SV=1
258	1	UniProt_human	P42574	171	31587	5	5	3	3	0.49	Caspase-3 OS=Homo sapiens GN=CASP3 PE=1 SV=2
259	1	UniProt_human	J3QS39	171	10463	8	8	2	2	1.19	Polyubiquitin-B (Fragment) OS=Homo sapiens GN=UBB PE=1 SV=1
260	1	UniProt_human	Q9H5V9	170	25608	5	5	3	3	0.63	UPF0428 protein CXorf56 OS=Homo sapiens GN=CXorf56 PE=1 SV=1
261	1	UniProt_human	A8MTM1	169	24483	4	4	4	4	0.98	Carbonyl reductase [NADPH] 1 OS=Homo sapiens GN=CBR1 PE=1 SV=1
262	1	UniProt_human	Q5T653	167	33280	6	6	3	3	0.46	39S ribosomal protein L2, mitochondrial OS=Homo sapiens GN=MRPL2 PE=1 SV=2
263	1	UniProt_human	A0A087WWU8	165	26404	5	5	3	3	0.61	Tropomyosin alpha-3 chain OS=Homo sapiens GN=TPM3 PE=1 SV=1
264	1	UniProt_human	H0Y714	165	31926	5	5	2	2	0.3	U3 small nucleolar ribonucleoprotein protein IMP4 (Fragment) OS=Homo sapiens GN=IMP4 PE=1 SV=1
265	1	UniProt_human	P60174	165	30772	8	8	5	5	0.98	Triosephosphate isomerase OS=Homo sapiens GN=TPI1 PE=1 SV=3
266	1	UniProt_human	Q15024	164	31801	5	5	3	3	0.49	Exosome complex component RRP42 OS=Homo sapiens GN=EXOSC7 PE=1 SV=3
267	1	UniProt_human	B4DHE8	163	34790	7	7	3	3	0.44	RNA-binding protein Musashi homolog 2 OS=Homo sapiens GN=MSI2 PE=1 SV=1
268	1	UniProt_human	Q5HYI7	163	35071	7	7	4	4	0.62	Metaxin-3 OS=Homo sapiens GN=MTX3 PE=1 SV=2
269	1	UniProt_human	Q9Y320	163	34016	6	6	4	4	0.64	Thioredoxin-related transmembrane protein 2 OS=Homo sapiens GN=TMX2 PE=1 SV=1
270	1	UniProt_human	Q7L523	161	36543	4	4	3	3	0.41	Ras-related GTP-binding protein A OS=Homo sapiens GN=RRAGA PE=1 SV=1
271	1	UniProt_human	Q9Y399	160	33228	10	10	6	6	1.14	28S ribosomal protein S2, mitochondrial OS=Homo sapiens GN=MRPS2 PE=1 SV=1
272	1	UniProt_human	A6NGW1	158	26361	6	6	3	3	0.61	Protein YIF1A OS=Homo sapiens GN=YIF1A PE=1 SV=1
273	1	UniProt_human	Q9Y316	158	33711	4	4	3	3	0.45	Protein MEMO1 OS=Homo sapiens GN=MEMO1 PE=1 SV=1
274	1	UniProt_human	P08758	155	35914	2	2	2	2	0.26	Annexin A5 OS=Homo sapiens GN=ANXA5 PE=1 SV=2
275	1	UniProt_human	A0A087WUV8	154	20529	8	8	4	4	1.26	Basigin OS=Homo sapiens GN=BSG PE=1 SV=1
276	1	UniProt_human	P50897	153	34171	2	2	2	2	0.28	Palmitoyl-protein thioesterase 1 OS=Homo sapiens GN=PPT1 PE=1 SV=1
277	1	UniProt_human	Q9BYD6	153	36885	6	6	5	5	0.77	39S ribosomal protein L1, mitochondrial OS=Homo sapiens GN=MRPL1 PE=1 SV=2
278	1	UniProt_human	Q7L0Y3	153	47317	6	6	4	4	0.43	Mitochondrial ribonuclease P protein 1 OS=Homo sapiens GN=TRMT10C PE=1 SV=2
279	1	UniProt_human	Q92600	153	33610	8	8	6	6	1.12	Cell differentiation protein RCD1 homolog OS=Homo sapiens GN=RQCD1 PE=1 SV=1
280	1	UniProt_human	Q53GG5-2	152	34258	3	3	2	2	0.28	Isoform 2 of PDZ and LIM domain protein 3 OS=Homo sapiens GN=PDLIM3
281	1	UniProt_human	Q9UJS0	152	74129	4	4	3	3	0.19	Calcium-binding mitochondrial carrier protein Aralar2 OS=Homo sapiens GN=SLC25A13 PE=1 SV=2
282	1	UniProt_human	O14654	151	133685	3	3	3	3	0.1	Insulin receptor substrate 4 OS=Homo sapiens GN=IRS4 PE=1 SV=1
220	2	UniProt_human	P52597	150	45643	5	5	4	4	0.45	Heterogeneous nuclear ribonucleoprotein F OS=Homo sapiens GN=HNRNPF PE=1 SV=3
283	1	UniProt_human	Q7Z7H8	149	29264	7	7	3	3	0.54	39S ribosomal protein L10, mitochondrial OS=Homo sapiens GN=MRPL10 PE=1 SV=3
284	1	UniProt_human	P78345	149	31815	4	4	3	3	0.49	Ribonuclease P protein subunit p38 OS=Homo sapiens GN=RPP38 PE=1 SV=2
285	1	UniProt_human	P56937	148	38182	3	3	2	2	0.25	3-keto-steroid reductase OS=Homo sapiens GN=HSD17B7 PE=1 SV=1
286	1	UniProt_human	H0YEN6	148	23333	2	2	1	1	0.2	Delta(14)-sterol reductase (Fragment) OS=Homo sapiens GN=TM7SF2 PE=1 SV=1
287	1	UniProt_human	A0A087WWQ2	148	24442	7	7	4	4	0.99	Uncharacterized protein (Fragment) OS=Homo sapiens PE=4 SV=1
288	1	UniProt_human	Q5T4U5	148	50238	6	6	6	6	0.66	Acyl-Coenzyme A dehydrogenase, C-4 to C-12 straight chain, isoform CRA_a OS=Homo sapiens GN=ACADM PE=1 SV=1
289	1	UniProt_human	Q16769	148	40851	6	6	4	4	0.68	Glutaminyl-peptide cyclotransferase OS=Homo sapiens GN=QPCT PE=1 SV=1
290	1	UniProt_human	Q68D91	147	31352	6	6	3	3	0.5	Metallo-beta-lactamase domain-containing protein 2 OS=Homo sapiens GN=MBLAC2 PE=1 SV=3
3	4	UniProt_human	Q00535	145	33283	7	7	4	4	0.66	Cyclin-dependent-like kinase 5 OS=Homo sapiens GN=CDK5 PE=1 SV=3
291	1	UniProt_human	J3KTE4	145	23233	3	3	2	2	0.43	Ribosomal protein L19 OS=Homo sapiens GN=RPL19 PE=1 SV=1
292	1	UniProt_human	K7EK42	144	21282	3	3	2	2	0.48	Tubulin-folding cofactor B OS=Homo sapiens GN=TBCB PE=1 SV=1
293	1	UniProt_human	Q5VT66	142	37476	4	4	3	3	0.4	Mitochondrial amidoxime-reducing component 1 OS=Homo sapiens GN=MARC1 PE=1 SV=1
294	1	UniProt_human	B1AK87	142	29277	6	6	5	5	1.05	Capping protein (Actin filament) muscle Z-line, beta, isoform CRA_a OS=Homo sapiens GN=CAPZB PE=1 SV=1
295	1	UniProt_human	A2AAZ0	142	25945	2	2	2	2	0.38	HLA class II histocompatibility antigen, DQ beta 1 chain OS=Homo sapiens GN=HLA-DQB1 PE=1 SV=1
296	1	UniProt_human	O14929-2	141	39761	2	2	1	1	0.11	Isoform B of Histone acetyltransferase type B catalytic subunit OS=Homo sapiens GN=HAT1
297	1	UniProt_human	P60510	140	35057	5	5	3	3	0.43	Serine/threonine-protein phosphatase 4 catalytic subunit OS=Homo sapiens GN=PPP4C PE=1 SV=1
298	1	UniProt_human	A0A0B4J1Z1	139	15753	8	8	3	3	1.2	Serine/arginine-rich-splicing factor 7 OS=Homo sapiens GN=SRSF7 PE=1 SV=1
299	1	UniProt_human	Q8TCX1	139	39600	10	10	7	7	1.11	Cytoplasmic dynein 2 light intermediate chain 1 OS=Homo sapiens GN=DYNC2LI1 PE=1 SV=1
300	1	UniProt_human	O14681	139	38940	6	6	6	6	0.91	Etoposide-induced protein 2.4 homolog OS=Homo sapiens GN=EI24 PE=1 SV=4
301	1	UniProt_human	G3V158	139	25097	4	4	3	3	0.65	2-deoxyribose-5-phosphate aldolase homolog (C. elegans), isoform CRA_a OS=Homo sapiens GN=DERA PE=1 SV=1
302	1	UniProt_human	Q9H300	137	42163	5	5	3	3	0.35	Presenilins-associated rhomboid-like protein, mitochondrial OS=Homo sapiens GN=PARL PE=1 SV=2
303	1	UniProt_human	Q86W42	137	37511	4	4	4	4	0.57	THO complex subunit 6 homolog OS=Homo sapiens GN=THOC6 PE=1 SV=1
304	1	UniProt_human	O75663	136	31424	8	8	7	7	1.55	TIP41-like protein OS=Homo sapiens GN=TIPRL PE=1 SV=2
305	1	UniProt_human	A0A087WU53	136	41504	10	10	6	6	0.84	Magnesium transporter protein 1 OS=Homo sapiens GN=MAGT1 PE=1 SV=1
306	1	UniProt_human	O75934	136	26115	6	6	3	3	0.62	Pre-mRNA-splicing factor SPF27 OS=Homo sapiens GN=BCAS2 PE=1 SV=1
307	1	UniProt_human	P31942	136	36903	6	6	4	4	0.58	Heterogeneous nuclear ribonucleoprotein H3 OS=Homo sapiens GN=HNRNPH3 PE=1 SV=2
308	1	UniProt_human	P50991	136	57888	4	4	3	3	0.24	T-complex protein 1 subunit delta OS=Homo sapiens GN=CCT4 PE=1 SV=4
309	1	UniProt_human	P51572	136	27974	7	7	5	5	1.12	B-cell receptor-associated protein 31 OS=Homo sapiens GN=BCAP31 PE=1 SV=3
310	1	UniProt_human	D6RA89	135	23002	6	6	3	3	0.73	Peroxisome biogenesis factor 10 OS=Homo sapiens GN=PEX10 PE=1 SV=1
311	1	UniProt_human	E5RHF4	135	21930	7	7	5	5	1.59	39S ribosomal protein L15, mitochondrial (Fragment) OS=Homo sapiens GN=MRPL15 PE=1 SV=1
312	1	UniProt_human	E9PC15	135	43770	4	4	3	3	0.34	Acylglycerol kinase, mitochondrial OS=Homo sapiens GN=AGK PE=1 SV=1
313	1	UniProt_human	J3KR44	135	31421	3	3	2	2	0.31	Ubiquitin thioesterase OS=Homo sapiens GN=OTUB1 PE=1 SV=2
314	1	UniProt_human	A0A0U1RQG6	135	31335	2	2	1	1	0.14	WD repeat domain phosphoinositide-interacting protein 4 OS=Homo sapiens GN=WDR45 PE=1 SV=1
315	1	UniProt_human	Q9H7E9	134	24977	6	6	3	3	0.65	UPF0488 protein C8orf33 OS=Homo sapiens GN=C8orf33 PE=1 SV=1
316	1	UniProt_human	Q8N335	134	38394	5	5	4	4	0.55	Glycerol-3-phosphate dehydrogenase 1-like protein OS=Homo sapiens GN=GPD1L PE=1 SV=1
317	1	UniProt_human	Q9Y6C9	133	33309	6	6	3	3	0.46	Mitochondrial carrier homolog 2 OS=Homo sapiens GN=MTCH2 PE=1 SV=1
8	3	UniProt_human	A6NHL2	132	49877	5	5	3	3	0.29	Tubulin alpha chain-like 3 OS=Homo sapiens GN=TUBAL3 PE=1 SV=2
318	1	UniProt_human	D6RGE2	131	20227	5	5	4	4	1.29	Isochorismatase domain-containing protein 1 (Fragment) OS=Homo sapiens GN=ISOC1 PE=1 SV=1
319	1	UniProt_human	C9JKL2	130	24781	6	6	3	3	0.66	MLN64 N-terminal domain homolog OS=Homo sapiens GN=STARD3NL PE=1 SV=1
320	1	UniProt_human	Q86YZ3	130	282228	4	4	3	3	0.05	Hornerin OS=Homo sapiens GN=HRNR PE=1 SV=2
152	2	UniProt_human	Q15365	129	37474	7	7	3	3	0.4	Poly(rC)-binding protein 1 OS=Homo sapiens GN=PCBP1 PE=1 SV=2
321	1	UniProt_human	H0YFC6	129	11672	3	3	2	2	1.03	GTP-binding nuclear protein Ran (Fragment) OS=Homo sapiens GN=RAN PE=1 SV=1
322	1	UniProt_human	Q3KQZ1-4	129	31247	3	3	3	3	0.5	Isoform 4 of Solute carrier family 25 member 35 OS=Homo sapiens GN=SLC25A35
323	1	UniProt_human	H7C333	127	13769	5	5	2	2	0.82	Protein NipSnap homolog 2 (Fragment) OS=Homo sapiens GN=GBAS PE=1 SV=1
324	1	UniProt_human	Q8N8L6	127	27442	5	5	4	4	0.84	ADP-ribosylation factor-like protein 10 OS=Homo sapiens GN=ARL10 PE=2 SV=1
325	1	UniProt_human	P61964	127	36565	4	4	3	3	0.41	WD repeat-containing protein 5 OS=Homo sapiens GN=WDR5 PE=1 SV=1
326	1	UniProt_human	F5H1S8	126	16719	5	5	3	3	1.1	Malectin (Fragment) OS=Homo sapiens GN=MLEC PE=1 SV=1
327	1	UniProt_human	H0Y2P9	126	30936	4	4	2	2	0.31	Phosphatidylinositol-glycan biosynthesis class X protein OS=Homo sapiens GN=PIGX PE=1 SV=1
328	1	UniProt_human	E7ER27	124	53894	2	2	2	2	0.17	Peroxisomal multifunctional enzyme type 2 OS=Homo sapiens GN=HSD17B4 PE=1 SV=3
329	1	UniProt_human	B4E3T4	124	24982	6	6	4	4	0.96	HCG2043421, isoform CRA_c OS=Homo sapiens GN=RBPMS PE=1 SV=1
330	1	UniProt_human	H0Y2S1	124	56862	3	3	2	2	0.16	Putative GTP-binding protein 6 OS=Homo sapiens GN=GTPBP6 PE=1 SV=2
331	1	UniProt_human	P54709	124	31492	7	7	3	3	0.49	Sodium/potassium-transporting ATPase subunit beta-3 OS=Homo sapiens GN=ATP1B3 PE=1 SV=1
332	1	UniProt_human	J3QLS3	123	31684	7	7	6	6	1.22	28S ribosomal protein S7, mitochondrial OS=Homo sapiens GN=MRPS7 PE=1 SV=1
333	1	UniProt_human	Q96EE3	123	39623	5	5	3	3	0.38	Nucleoporin SEH1 OS=Homo sapiens GN=SEH1L PE=1 SV=3
334	1	UniProt_human	O95456	123	32833	6	6	2	2	0.29	Proteasome assembly chaperone 1 OS=Homo sapiens GN=PSMG1 PE=1 SV=1
335	1	UniProt_human	Q15181	122	32639	1	1	1	1	0.14	Inorganic pyrophosphatase OS=Homo sapiens GN=PPA1 PE=1 SV=2
336	1	UniProt_human	J3KND6	120	26401	2	2	1	1	0.17	DTW domain containing 2, isoform CRA_d OS=Homo sapiens GN=DTWD2 PE=1 SV=1
337	1	UniProt_human	Q9NQT4	120	25233	5	5	2	2	0.39	Exosome complex component RRP46 OS=Homo sapiens GN=EXOSC5 PE=1 SV=1
338	1	UniProt_human	A0A087WT23	119	35162	3	3	2	2	0.27	UBX domain-containing protein 8 OS=Homo sapiens GN=UBXN8 PE=1 SV=1
339	1	UniProt_human	H7C3T4	118	18314	6	6	3	3	0.98	Peroxiredoxin-4 (Fragment) OS=Homo sapiens GN=PRDX4 PE=1 SV=1
340	1	UniProt_human	A0A087WXU0	118	32240	5	5	3	3	0.48	Required for meiotic nuclear division protein 1 homolog OS=Homo sapiens GN=RMND1 PE=1 SV=1
341	1	UniProt_human	Q14964	118	24991	5	5	4	4	0.96	Ras-related protein Rab-39A OS=Homo sapiens GN=RAB39A PE=1 SV=2
342	1	UniProt_human	F6WQW2	117	31884	5	5	4	4	0.7	Ran-specific GTPase-activating protein OS=Homo sapiens GN=RANBP1 PE=1 SV=1
343	1	UniProt_human	Q92905	117	37555	5	5	4	4	0.57	COP9 signalosome complex subunit 5 OS=Homo sapiens GN=COPS5 PE=1 SV=4
344	1	UniProt_human	U3KPU7	117	46413	4	4	2	2	0.2	Glucose-6-phosphate exchanger SLC37A4 OS=Homo sapiens GN=SLC37A4 PE=1 SV=2
345	1	UniProt_human	Q96BW9-3	117	38055	4	4	4	4	0.56	Isoform 3 of Phosphatidate cytidylyltransferase, mitochondrial OS=Homo sapiens GN=TAMM41
346	1	UniProt_human	Q9UBK7-2	116	26170	5	5	3	3	0.62	Isoform 2 of Rab-like protein 2A OS=Homo sapiens GN=RABL2A
347	1	UniProt_human	Q92506	116	26957	5	5	4	4	0.86	Estradiol 17-beta-dehydrogenase 8 OS=Homo sapiens GN=HSD17B8 PE=1 SV=2
348	1	UniProt_human	Q16698	115	36045	3	3	2	2	0.26	2,4-dienoyl-CoA reductase, mitochondrial OS=Homo sapiens GN=DECR1 PE=1 SV=1
349	1	UniProt_human	H7BY10	115	17792	3	3	2	2	0.6	60S ribosomal protein L23a (Fragment) OS=Homo sapiens GN=RPL23A PE=1 SV=1
350	1	UniProt_human	D6RAN4	113	20762	5	5	4	4	1.24	60S ribosomal protein L9 (Fragment) OS=Homo sapiens GN=RPL9 PE=1 SV=8
351	1	UniProt_human	C9JJ19	113	26316	5	5	3	3	0.61	28S ribosomal protein S34, mitochondrial OS=Homo sapiens GN=MRPS34 PE=1 SV=2
352	1	UniProt_human	A0A1B0GTG4	113	36382	3	3	3	3	0.41	Ras association domain-containing protein 5 OS=Homo sapiens GN=RASSF5 PE=4 SV=1
353	1	UniProt_human	E7EQV9	112	20497	3	3	2	2	0.5	Ribosomal protein L15 (Fragment) OS=Homo sapiens GN=RPL15 PE=1 SV=1
354	1	UniProt_human	Q96BR5	110	25692	8	8	4	4	0.92	Cytochrome c oxidase assembly factor 7 OS=Homo sapiens GN=COA7 PE=1 SV=2
355	1	UniProt_human	Q92688	110	28770	4	4	3	3	0.55	Acidic leucine-rich nuclear phosphoprotein 32 family member B OS=Homo sapiens GN=ANP32B PE=1 SV=1
356	1	UniProt_human	K7ERV3	110	28576	3	3	3	3	0.56	Thymidine kinase OS=Homo sapiens GN=TK1 PE=1 SV=1
357	1	UniProt_human	Q9Y383	109	46486	4	4	3	3	0.31	Putative RNA-binding protein Luc7-like 2 OS=Homo sapiens GN=LUC7L2 PE=1 SV=2
358	1	UniProt_human	O00151	109	36049	4	4	3	3	0.42	PDZ and LIM domain protein 1 OS=Homo sapiens GN=PDLIM1 PE=1 SV=4
359	1	UniProt_human	C9JNW5	109	17532	6	6	3	3	1.04	60S ribosomal protein L24 OS=Homo sapiens GN=RPL24 PE=1 SV=1
360	1	UniProt_human	P42126	108	32795	5	5	3	3	0.47	Enoyl-CoA delta isomerase 1, mitochondrial OS=Homo sapiens GN=ECI1 PE=1 SV=1
361	1	UniProt_human	P41227	107	26442	4	4	3	3	0.61	N-alpha-acetyltransferase 10 OS=Homo sapiens GN=NAA10 PE=1 SV=1
362	1	UniProt_human	Q8WXX5	106	29891	5	5	5	5	1.02	DnaJ homolog subfamily C member 9 OS=Homo sapiens GN=DNAJC9 PE=1 SV=1
363	1	UniProt_human	A0A0D9SEV4	106	19013	5	5	3	3	0.93	Tyrosine-protein kinase Fer OS=Homo sapiens GN=FER PE=1 SV=1
364	1	UniProt_human	Q8NHP8	106	65430	7	7	3	3	0.21	Putative phospholipase B-like 2 OS=Homo sapiens GN=PLBD2 PE=1 SV=2
365	1	UniProt_human	H0YJH8	106	17681	2	2	1	1	0.27	V-type proton ATPase subunit D (Fragment) OS=Homo sapiens GN=ATP6V1D PE=1 SV=1
367	1	UniProt_human	Q5VXN5	105	30477	1	1	1	1	0.15	S-adenosylmethionine decarboxylase proenzyme OS=Homo sapiens GN=AMD1 PE=1 SV=1
368	1	UniProt_human	O75771	105	35027	3	3	3	3	0.43	DNA repair protein RAD51 homolog 4 OS=Homo sapiens GN=RAD51D PE=1 SV=1
369	1	UniProt_human	H7C0R7	105	24889	3	3	2	2	0.4	NADH-cytochrome b5 reductase 1 (Fragment) OS=Homo sapiens GN=CYB5R1 PE=1 SV=1
366	1	UniProt_human	H7BXD5	104	22095	3	3	2	2	0.46	Grancalcin OS=Homo sapiens GN=GCA PE=1 SV=1
370	1	UniProt_human	B4DP61	104	24365	4	4	2	2	0.41	Survival motor neuron protein OS=Homo sapiens GN=SMN2 PE=1 SV=1
371	1	UniProt_human	Q92882	104	23772	2	2	2	2	0.42	Osteoclast-stimulating factor 1 OS=Homo sapiens GN=OSTF1 PE=1 SV=2
372	1	UniProt_human	Q86VD7	103	35387	1	1	1	1	0.13	Mitochondrial coenzyme A transporter SLC25A42 OS=Homo sapiens GN=SLC25A42 PE=2 SV=2
373	1	UniProt_human	P15924	103	331569	7	7	7	7	0.09	Desmoplakin OS=Homo sapiens GN=DSP PE=1 SV=3
374	1	UniProt_human	M0R181	103	14140	3	3	1	1	0.34	60S ribosomal protein L21 (Fragment) OS=Homo sapiens GN=RPL21 PE=1 SV=1
375	1	UniProt_human	O43752	103	29158	2	2	2	2	0.33	Syntaxin-6 OS=Homo sapiens GN=STX6 PE=1 SV=1
376	1	UniProt_human	D6RG39	103	19011	4	4	2	2	0.55	OCIA domain-containing protein 1 (Fragment) OS=Homo sapiens GN=OCIAD1 PE=1 SV=1
377	1	UniProt_human	R4GMR5	103	32531	6	6	3	3	0.47	26S proteasome non-ATPase regulatory subunit 8 OS=Homo sapiens GN=PSMD8 PE=1 SV=1
378	1	UniProt_human	H7C1L7	102	16506	3	3	3	3	1.12	N-acetyl-D-glucosamine kinase OS=Homo sapiens GN=NAGK PE=1 SV=2
379	1	UniProt_human	Q9Y2Z0	102	40998	2	2	2	2	0.23	Protein SGT1 homolog OS=Homo sapiens GN=SUGT1 PE=1 SV=3
380	1	UniProt_human	Q92665	102	45290	3	3	2	2	0.2	28S ribosomal protein S31, mitochondrial OS=Homo sapiens GN=MRPS31 PE=1 SV=3
381	1	UniProt_human	Q15404	102	31521	5	5	3	3	0.7	Ras suppressor protein 1 OS=Homo sapiens GN=RSU1 PE=1 SV=3
382	1	UniProt_human	A6NFX8	102	25879	3	3	3	3	0.63	ADP-sugar pyrophosphatase OS=Homo sapiens GN=NUDT5 PE=1 SV=1
383	1	UniProt_human	A0A0C4DG17	102	33293	2	2	2	2	0.29	40S ribosomal protein SA OS=Homo sapiens GN=RPSA PE=1 SV=1
384	1	UniProt_human	A0A0C4DFR6	102	35834	3	3	2	2	0.42	Protein SEC13 homolog OS=Homo sapiens GN=SEC13 PE=1 SV=1
385	1	UniProt_human	Q5VST6	102	32194	3	3	2	2	0.3	Protein ABHD17B OS=Homo sapiens GN=ABHD17B PE=1 SV=1
386	1	UniProt_human	A0A087WVZ9	101	21446	2	2	2	2	0.48	DNA-directed RNA polymerases I, II, and III subunit RPABC1 OS=Homo sapiens GN=POLR2E PE=1 SV=1
387	1	UniProt_human	C9JQV0	100	21870	3	3	1	1	0.21	Uncharacterized protein C7orf50 (Fragment) OS=Homo sapiens GN=C7orf50 PE=1 SV=1
388	1	UniProt_human	P09497-2	100	23167	5	5	3	3	0.72	Isoform Non-brain of Clathrin light chain B OS=Homo sapiens GN=CLTB
389	1	UniProt_human	Q9H1X3	99	42377	1	1	1	1	0.1	DnaJ homolog subfamily C member 25 OS=Homo sapiens GN=DNAJC25 PE=1 SV=1
390	1	UniProt_human	Q9H4P4	99	35882	4	4	2	2	0.26	E3 ubiquitin-protein ligase NRDP1 OS=Homo sapiens GN=RNF41 PE=1 SV=2
391	1	UniProt_human	P0DN76	98	27854	3	3	2	2	0.35	Splicing factor U2AF 35 kDa subunit-like protein OS=Homo sapiens GN=U2AF1L5 PE=1 SV=1
392	1	UniProt_human	O95983	98	32823	3	3	3	3	0.47	Methyl-CpG-binding domain protein 3 OS=Homo sapiens GN=MBD3 PE=1 SV=1
393	1	UniProt_human	Q9BRP8	98	22642	4	4	3	3	0.74	Partner of Y14 and mago OS=Homo sapiens GN=PYM1 PE=1 SV=1
394	1	UniProt_human	Q9H2W6	98	31685	3	3	2	2	0.3	39S ribosomal protein L46, mitochondrial OS=Homo sapiens GN=MRPL46 PE=1 SV=1
395	1	UniProt_human	Q9NX20	97	28431	4	4	3	3	0.56	39S ribosomal protein L16, mitochondrial OS=Homo sapiens GN=MRPL16 PE=1 SV=1
396	1	UniProt_human	Q5SRQ6	96	26908	4	4	3	3	0.6	Casein kinase II subunit beta OS=Homo sapiens GN=CSNK2B PE=1 SV=2
397	1	UniProt_human	P48651	96	55491	2	2	1	1	0.08	Phosphatidylserine synthase 1 OS=Homo sapiens GN=PTDSS1 PE=1 SV=1
398	1	UniProt_human	P04818	96	35693	6	6	4	4	0.6	Thymidylate synthase OS=Homo sapiens GN=TYMS PE=1 SV=3
399	1	UniProt_human	X6RM59	96	37382	3	3	2	2	0.25	5'-nucleotidase OS=Homo sapiens GN=NT5C3A PE=1 SV=1
400	1	UniProt_human	Q6YN16	96	45366	3	3	3	3	0.32	Hydroxysteroid dehydrogenase-like protein 2 OS=Homo sapiens GN=HSDL2 PE=1 SV=1
401	1	UniProt_human	K7EPJ1	96	22434	2	2	1	1	0.21	Ubiquitin-conjugating enzyme E2 S (Fragment) OS=Homo sapiens GN=UBE2S PE=1 SV=1
134	2	UniProt_human	E9PGC8	95	331055	5	5	2	2	0.03	Microtubule-associated protein 1A OS=Homo sapiens GN=MAP1A PE=1 SV=1
402	1	UniProt_human	B4DHN5	95	25951	3	3	2	2	0.38	Syntenin-1 OS=Homo sapiens GN=SDCBP PE=1 SV=1
403	1	UniProt_human	H3BRL9	95	23813	1	1	1	1	0.19	Endonuclease III-like protein 1 (Fragment) OS=Homo sapiens GN=NTHL1 PE=1 SV=1
404	1	UniProt_human	Q6P2C8	95	35409	2	2	2	2	0.27	Mediator of RNA polymerase II transcription subunit 27 OS=Homo sapiens GN=MED27 PE=1 SV=1
405	1	UniProt_human	P43686	94	47337	2	2	2	2	0.2	26S protease regulatory subunit 6B OS=Homo sapiens GN=PSMC4 PE=1 SV=2
406	1	UniProt_human	Q9UKD2	94	27543	6	6	4	4	0.84	mRNA turnover protein 4 homolog OS=Homo sapiens GN=MRTO4 PE=1 SV=2
407	1	UniProt_human	C9J6C5	94	19541	2	2	2	2	0.53	MKI67 FHA domain-interacting nucleolar phosphoprotein (Fragment) OS=Homo sapiens GN=NIFK PE=1 SV=1
408	1	UniProt_human	Q5QPE7	94	28821	2	2	1	1	0.16	Mitochondrial genome maintenance exonuclease 1 OS=Homo sapiens GN=MGME1 PE=1 SV=1
409	1	UniProt_human	Q5D862	94	247928	2	2	1	1	0.02	Filaggrin-2 OS=Homo sapiens GN=FLG2 PE=1 SV=1
410	1	UniProt_human	E9PLL0	93	12979	2	2	1	1	0.37	Multivesicular body subunit 12A (Fragment) OS=Homo sapiens GN=MVB12A PE=1 SV=1
411	1	UniProt_human	I3L0B8	93	34918	2	2	1	1	0.13	Solute carrier family 25 member 52 OS=Homo sapiens GN=SLC25A52 PE=1 SV=1
412	1	UniProt_human	P81605	93	11277	3	3	3	3	1.97	Dermcidin OS=Homo sapiens GN=DCD PE=1 SV=2
413	1	UniProt_human	Q6P2I3	92	34591	3	3	1	1	0.13	Fumarylacetoacetate hydrolase domain-containing protein 2B OS=Homo sapiens GN=FAHD2B PE=1 SV=1
414	1	UniProt_human	Q5SZU1	92	53051	2	2	2	2	0.17	D-3-phosphoglycerate dehydrogenase OS=Homo sapiens GN=PHGDH PE=1 SV=1
415	1	UniProt_human	A0A0U1RQT9	92	14957	3	3	1	1	0.32	Synaptophysin-like protein 1 (Fragment) OS=Homo sapiens GN=SYPL1 PE=1 SV=1
416	1	UniProt_human	P00918	92	29228	2	2	2	2	0.33	Carbonic anhydrase 2 OS=Homo sapiens GN=CA2 PE=1 SV=2
417	1	UniProt_human	P16260	91	36200	5	5	4	4	0.59	Graves disease carrier protein OS=Homo sapiens GN=SLC25A16 PE=1 SV=3
418	1	UniProt_human	Q9H5Q4	91	45320	9	9	5	5	0.59	Dimethyladenosine transferase 2, mitochondrial OS=Homo sapiens GN=TFB2M PE=1 SV=1
419	1	UniProt_human	O95900	91	36671	4	4	3	3	0.41	Probable tRNA pseudouridine synthase 2 OS=Homo sapiens GN=TRUB2 PE=1 SV=1
420	1	UniProt_human	P40227	90	57988	4	4	2	2	0.16	T-complex protein 1 subunit zeta OS=Homo sapiens GN=CCT6A PE=1 SV=3
421	1	UniProt_human	Q14232	90	33691	4	4	4	4	0.65	Translation initiation factor eIF-2B subunit alpha OS=Homo sapiens GN=EIF2B1 PE=1 SV=1
422	1	UniProt_human	Q5JXI8	90	29140	3	3	3	3	0.54	Four and a half LIM domains protein 1 (Fragment) OS=Homo sapiens GN=FHL1 PE=1 SV=1
423	1	UniProt_human	E9PHS0	90	22028	4	4	2	2	0.46	LanC-like protein 1 (Fragment) OS=Homo sapiens GN=LANCL1 PE=1 SV=1
424	1	UniProt_human	Q08209	89	58650	5	5	5	5	0.43	Serine/threonine-protein phosphatase 2B catalytic subunit alpha isoform OS=Homo sapiens GN=PPP3CA PE=1 SV=1
425	1	UniProt_human	H0YDP6	89	22015	4	4	2	2	0.46	Gem-associated protein 2 (Fragment) OS=Homo sapiens GN=GEMIN2 PE=1 SV=8
426	1	UniProt_human	Q5HYI8	88	26407	2	2	1	1	0.17	Rab-like protein 3 OS=Homo sapiens GN=RABL3 PE=1 SV=1
427	1	UniProt_human	A0A087WUS0	87	15343	2	2	2	2	0.72	40S ribosomal protein S24 OS=Homo sapiens GN=RPS24 PE=1 SV=1
428	1	UniProt_human	A0A075B7C0	87	21898	1	1	1	1	0.21	Calpain small subunit 1 (Fragment) OS=Homo sapiens GN=CAPNS1 PE=1 SV=1
429	1	UniProt_human	Q9ULW3	87	31060	4	4	4	4	0.72	Activator of basal transcription 1 OS=Homo sapiens GN=ABT1 PE=1 SV=1
430	1	UniProt_human	A0A140T912	87	41440	1	1	1	1	0.11	HLA class I histocompatibility antigen, Cw-6 alpha chain OS=Homo sapiens GN=HLA-C PE=1 SV=1
431	1	UniProt_human	E9PLL6	87	12194	3	3	2	2	0.96	60S ribosomal protein L27a OS=Homo sapiens GN=RPL27A PE=1 SV=1
432	1	UniProt_human	S4R3U9	87	9098	1	1	1	1	0.56	ER membrane protein complex subunit 3 (Fragment) OS=Homo sapiens GN=EMC3 PE=1 SV=1
433	1	UniProt_human	Q9NYP9	86	25846	1	1	1	1	0.18	Protein Mis18-alpha OS=Homo sapiens GN=MIS18A PE=1 SV=1
434	1	UniProt_human	D6RBW1	86	28494	3	3	1	1	0.16	Eukaryotic translation initiation factor 4E OS=Homo sapiens GN=EIF4E PE=1 SV=1
435	1	UniProt_human	Q6P087	86	38437	3	3	2	2	0.25	RNA pseudouridylate synthase domain-containing protein 3 OS=Homo sapiens GN=RPUSD3 PE=1 SV=3
436	1	UniProt_human	Q13243	86	31245	2	2	1	1	0.14	Serine/arginine-rich splicing factor 5 OS=Homo sapiens GN=SRSF5 PE=1 SV=1
437	1	UniProt_human	Q6DKK2	86	42430	3	3	3	3	0.35	Tetratricopeptide repeat protein 19, mitochondrial OS=Homo sapiens GN=TTC19 PE=1 SV=4
438	1	UniProt_human	H0YIV5	86	16364	3	3	2	2	0.66	LETM1 domain-containing protein 1 (Fragment) OS=Homo sapiens GN=LETMD1 PE=1 SV=1
439	1	UniProt_human	J3KN29	86	24538	4	4	3	3	0.67	26S proteasome non-ATPase regulatory subunit 9 OS=Homo sapiens GN=PSMD9 PE=1 SV=1
440	1	UniProt_human	H0Y6Y4	86	25430	2	2	2	2	0.39	Ubiquitin carboxyl-terminal hydrolase isozyme L5 (Fragment) OS=Homo sapiens GN=UCHL5 PE=1 SV=1
441	1	UniProt_human	Q92522	86	22474	2	2	1	1	0.21	Histone H1x OS=Homo sapiens GN=H1FX PE=1 SV=1
442	1	UniProt_human	Q96S44	85	28143	4	4	3	3	0.56	TP53-regulating kinase OS=Homo sapiens GN=TP53RK PE=1 SV=2
443	1	UniProt_human	Q7Z7A3	85	36427	2	2	2	2	0.26	Cytoplasmic tRNA 2-thiolation protein 1 OS=Homo sapiens GN=CTU1 PE=1 SV=1
444	1	UniProt_human	P28074	85	28462	3	3	3	3	0.56	Proteasome subunit beta type-5 OS=Homo sapiens GN=PSMB5 PE=1 SV=3
445	1	UniProt_human	A0A0A0MRS4	85	26433	3	3	2	2	0.37	Transmembrane protein 38B, isoform CRA_b OS=Homo sapiens GN=TMEM38B PE=1 SV=1
446	1	UniProt_human	Q8N5M1	84	32752	1	1	1	1	0.14	ATP synthase mitochondrial F1 complex assembly factor 2 OS=Homo sapiens GN=ATPAF2 PE=1 SV=1
447	1	UniProt_human	G3XAP1	84	6729	1	1	1	1	0.81	COP9 constitutive photomorphogenic homolog subunit 7A (Arabidopsis), isoform CRA_b OS=Homo sapiens GN=COPS7A PE=1 SV=1
448	1	UniProt_human	Q9BYD2	84	30224	4	4	2	2	0.32	39S ribosomal protein L9, mitochondrial OS=Homo sapiens GN=MRPL9 PE=1 SV=2
449	1	UniProt_human	A0A0U1RR32	83	18470	1	1	1	1	0.25	Histone H2A OS=Homo sapiens GN=hCG_2039566 PE=3 SV=1
450	1	UniProt_human	O95721	83	28953	4	4	3	3	0.54	Synaptosomal-associated protein 29 OS=Homo sapiens GN=SNAP29 PE=1 SV=1
452	1	UniProt_human	Q712K3	83	27149	2	2	1	1	0.17	Ubiquitin-conjugating enzyme E2 R2 OS=Homo sapiens GN=UBE2R2 PE=1 SV=1
453	1	UniProt_human	B7Z4C8	83	15109	3	3	2	2	0.73	60S ribosomal protein L31 OS=Homo sapiens GN=RPL31 PE=1 SV=1
451	1	UniProt_human	Q9GZT4	82	36543	2	2	2	2	0.26	Serine racemase OS=Homo sapiens GN=SRR PE=1 SV=1
454	1	UniProt_human	Q6P1S2	82	33744	3	3	2	2	0.28	Protein C3orf33 OS=Homo sapiens GN=C3orf33 PE=1 SV=2
455	1	UniProt_human	A0A0J9YXC7	82	45694	2	2	1	1	0.1	LIM and senescent cell antigen-like-containing domain protein 3 OS=Homo sapiens GN=LIMS4 PE=1 SV=1
456	1	UniProt_human	B1AKQ8	82	12190	5	5	3	3	1.75	Guanine nucleotide-binding protein G(I)/G(S)/G(T) subunit beta-1 (Fragment) OS=Homo sapiens GN=GNB1 PE=1 SV=8
457	1	UniProt_human	Q5T911	82	27060	2	2	1	1	0.17	Mediator of RNA polymerase II transcription subunit 4 (Fragment) OS=Homo sapiens GN=MED4 PE=1 SV=1
458	1	UniProt_human	Q3MHD2	82	21687	3	3	2	2	0.47	Protein LSM12 homolog OS=Homo sapiens GN=LSM12 PE=1 SV=2
459	1	UniProt_human	Q8IY95	81	30903	1	1	1	1	0.15	Transmembrane protein 192 OS=Homo sapiens GN=TMEM192 PE=1 SV=1
460	1	UniProt_human	Q9BVG4	81	26041	3	3	2	2	0.38	Protein PBDC1 OS=Homo sapiens GN=PBDC1 PE=1 SV=1
461	1	UniProt_human	Q07666	81	48197	3	3	2	2	0.19	KH domain-containing, RNA-binding, signal transduction-associated protein 1 OS=Homo sapiens GN=KHDRBS1 PE=1 SV=1
462	1	UniProt_human	O00170	81	37612	2	2	2	2	0.25	AH receptor-interacting protein OS=Homo sapiens GN=AIP PE=1 SV=2
463	1	UniProt_human	Q9Y385	81	35177	3	3	2	2	0.27	Ubiquitin-conjugating enzyme E2 J1 OS=Homo sapiens GN=UBE2J1 PE=1 SV=2
464	1	UniProt_human	Q8NBN7	81	35910	3	3	2	2	0.26	Retinol dehydrogenase 13 OS=Homo sapiens GN=RDH13 PE=1 SV=2
465	1	UniProt_human	Q969V5	80	39774	2	2	2	2	0.24	Mitochondrial ubiquitin ligase activator of NFKB 1 OS=Homo sapiens GN=MUL1 PE=1 SV=1
466	1	UniProt_human	J3QT54	80	22606	3	3	3	3	0.74	Cleavage and polyadenylation-specificity factor subunit 7 (Fragment) OS=Homo sapiens GN=CPSF7 PE=1 SV=8
467	1	UniProt_human	Q8N5C7	80	35226	3	3	2	2	0.27	DTW domain-containing protein 1 OS=Homo sapiens GN=DTWD1 PE=1 SV=1
298	2	UniProt_human	A0A087X2D0	78	10314	4	4	2	2	1.21	Serine/arginine-rich-splicing factor 3 OS=Homo sapiens GN=SRSF3 PE=1 SV=1
469	1	UniProt_human	H7C593	78	8559	2	2	1	1	0.61	Major facilitator superfamily domain-containing protein 1 OS=Homo sapiens GN=MFSD1 PE=1 SV=2
470	1	UniProt_human	U3KQ56	78	38671	1	1	1	1	0.12	Glyoxylate reductase/hydroxypyruvate reductase OS=Homo sapiens GN=GRHPR PE=1 SV=1
471	1	UniProt_human	P19474	78	54135	4	4	4	4	0.37	E3 ubiquitin-protein ligase TRIM21 OS=Homo sapiens GN=TRIM21 PE=1 SV=1
472	1	UniProt_human	P56589	78	42113	4	4	3	3	0.35	Peroxisomal biogenesis factor 3 OS=Homo sapiens GN=PEX3 PE=1 SV=1
474	1	UniProt_human	Q9Y676	77	29377	3	3	3	3	0.53	28S ribosomal protein S18b, mitochondrial OS=Homo sapiens GN=MRPS18B PE=1 SV=1
475	1	UniProt_human	K7EIN4	77	9629	3	3	1	1	0.53	Transmembrane emp24 domain-containing protein 1 OS=Homo sapiens GN=TMED1 PE=1 SV=1
476	1	UniProt_human	Q13084	77	30138	3	3	3	3	0.52	39S ribosomal protein L28, mitochondrial OS=Homo sapiens GN=MRPL28 PE=1 SV=4
477	1	UniProt_human	P28072	76	25341	2	2	2	2	0.39	Proteasome subunit beta type-6 OS=Homo sapiens GN=PSMB6 PE=1 SV=4
478	1	UniProt_human	P14923	76	81693	2	2	2	2	0.11	Junction plakoglobin OS=Homo sapiens GN=JUP PE=1 SV=3
479	1	UniProt_human	J3KT38	76	12693	2	2	1	1	0.39	Growth factor receptor-bound protein 2 (Fragment) OS=Homo sapiens GN=GRB2 PE=1 SV=8
480	1	UniProt_human	P52292	75	57826	2	2	1	1	0.08	Importin subunit alpha-1 OS=Homo sapiens GN=KPNA2 PE=1 SV=1
481	1	UniProt_human	Q7Z2W4	75	101367	2	2	2	2	0.09	Zinc finger CCCH-type antiviral protein 1 OS=Homo sapiens GN=ZC3HAV1 PE=1 SV=3
482	1	UniProt_human	H0YJN9	75	9763	1	1	1	1	0.52	Legumain (Fragment) OS=Homo sapiens GN=LGMN PE=1 SV=1
473	1	UniProt_human	P36543	74	26129	2	2	2	2	0.38	V-type proton ATPase subunit E 1 OS=Homo sapiens GN=ATP6V1E1 PE=1 SV=1
483	1	UniProt_human	Q96ES6	74	42669	2	2	1	1	0.1	Major facilitator superfamily domain-containing protein 3 OS=Homo sapiens GN=MFSD3 PE=2 SV=1
484	1	UniProt_human	P62805	74	11360	3	3	2	2	1.07	Histone H4 OS=Homo sapiens GN=HIST1H4A PE=1 SV=2
468	1	UniProt_human	Q9BUT1	73	26707	2	2	2	2	0.37	3-hydroxybutyrate dehydrogenase type 2 OS=Homo sapiens GN=BDH2 PE=1 SV=2
485	1	UniProt_human	A0A0B4J259	73	15319	1	1	1	1	0.31	Lysozyme C OS=Homo sapiens GN=LYZ PE=1 SV=1
486	1	UniProt_human	Q8N357	73	40188	3	3	2	2	0.23	Solute carrier family 35 member F6 OS=Homo sapiens GN=SLC35F6 PE=1 SV=1
487	1	UniProt_human	Q9H939	72	38834	4	4	3	3	0.38	Proline-serine-threonine phosphatase-interacting protein 2 OS=Homo sapiens GN=PSTPIP2 PE=1 SV=4
488	1	UniProt_human	Q8IUS5	72	42297	4	4	3	3	0.35	Epoxide hydrolase 4 OS=Homo sapiens GN=EPHX4 PE=2 SV=2
489	1	UniProt_human	H7BY16	72	32370	2	2	1	1	0.14	Nucleolin (Fragment) OS=Homo sapiens GN=NCL PE=1 SV=8
490	1	UniProt_human	P01859	72	35878	3	3	1	1	0.26	Ig gamma-2 chain C region OS=Homo sapiens GN=IGHG2 PE=1 SV=2
491	1	UniProt_human	Q86UL3	72	52037	1	1	1	1	0.08	Glycerol-3-phosphate acyltransferase 4 OS=Homo sapiens GN=GPAT4 PE=1 SV=1
492	1	UniProt_human	Q12907	71	40203	6	6	4	4	0.52	Vesicular integral-membrane protein VIP36 OS=Homo sapiens GN=LMAN2 PE=1 SV=1
493	1	UniProt_human	Q13637	71	24982	3	3	3	3	0.65	Ras-related protein Rab-32 OS=Homo sapiens GN=RAB32 PE=1 SV=3
494	1	UniProt_human	A0A087WVM4	71	99249	4	4	2	2	0.09	Monofunctional C1-tetrahydrofolate synthase, mitochondrial OS=Homo sapiens GN=MTHFD1L PE=1 SV=1
495	1	UniProt_human	I3L1Q3	71	28791	3	3	2	2	0.34	Elongator complex protein 5 (Fragment) OS=Homo sapiens GN=ELP5 PE=1 SV=1
496	1	UniProt_human	P10412	70	21852	3	3	3	3	0.77	Histone H1.4 OS=Homo sapiens GN=HIST1H1E PE=1 SV=2
497	1	UniProt_human	A0A0C4DFS0	70	28133	1	1	1	1	0.16	MAWD binding protein, isoform CRA_d OS=Homo sapiens GN=PBLD PE=1 SV=1
498	1	UniProt_human	P35998	70	48603	2	2	2	2	0.19	26S protease regulatory subunit 7 OS=Homo sapiens GN=PSMC2 PE=1 SV=3
499	1	UniProt_human	B3KVZ3	70	26223	2	2	2	2	0.38	Centromere protein H OS=Homo sapiens GN=CENPH PE=1 SV=1
500	1	UniProt_human	Q14558	70	39369	2	2	2	2	0.24	Phosphoribosyl pyrophosphate synthase-associated protein 1 OS=Homo sapiens GN=PRPSAP1 PE=1 SV=2
501	1	UniProt_human	Q99720	70	25112	1	1	1	1	0.18	Sigma non-opioid intracellular receptor 1 OS=Homo sapiens GN=SIGMAR1 PE=1 SV=1
502	1	UniProt_human	K7ELD9	70	6739	3	3	2	2	2.27	Synaptogyrin-2 OS=Homo sapiens GN=SYNGR2 PE=1 SV=1
503	1	UniProt_human	H0YIB4	69	12717	4	4	3	3	1.64	Serine/arginine-rich-splicing factor 9 (Fragment) OS=Homo sapiens GN=SRSF9 PE=1 SV=8
504	1	UniProt_human	Q969M3	69	27971	2	2	2	2	0.35	Protein YIPF5 OS=Homo sapiens GN=YIPF5 PE=1 SV=1
505	1	UniProt_human	P06312	69	13372	3	3	1	1	0.36	Immunoglobulin kappa variable 4-1 OS=Homo sapiens GN=IGKV4-1 PE=1 SV=1
506	1	UniProt_human	Q9Y673	69	36922	4	4	3	3	0.41	Dolichyl-phosphate beta-glucosyltransferase OS=Homo sapiens GN=ALG5 PE=1 SV=1
507	1	UniProt_human	Q96A35	68	24899	3	3	3	3	0.66	39S ribosomal protein L24, mitochondrial OS=Homo sapiens GN=MRPL24 PE=1 SV=1
508	1	UniProt_human	Q9NWR8	68	39057	2	2	1	1	0.11	Calcium uniporter regulatory subunit MCUb, mitochondrial OS=Homo sapiens GN=CCDC109B PE=1 SV=2
509	1	UniProt_human	Q9NXF7	67	24178	2	2	1	1	0.19	DDB1- and CUL4-associated factor 16 OS=Homo sapiens GN=DCAF16 PE=1 SV=1
510	1	UniProt_human	F5GWD3	67	28892	1	1	1	1	0.16	General transcription factor IIH subunit 3 (Fragment) OS=Homo sapiens GN=GTF2H3 PE=1 SV=1
511	1	UniProt_human	H0YHG0	67	59149	1	1	1	1	0.07	Uncharacterized protein (Fragment) OS=Homo sapiens PE=1 SV=1
512	1	UniProt_human	A0A0J9YW18	67	26119	2	2	1	1	0.17	BCL2/adenovirus E1B 19 kDa protein-interacting protein 3 (Fragment) OS=Homo sapiens GN=BNIP3 PE=1 SV=1
513	1	UniProt_human	E9PEQ6	67	27681	2	2	2	2	0.35	Peptidyl-prolyl cis-trans isomerase OS=Homo sapiens GN=PPIE PE=1 SV=1
514	1	UniProt_human	Q9BUL8	67	24686	4	4	2	2	0.4	Programmed cell death protein 10 OS=Homo sapiens GN=PDCD10 PE=1 SV=1
515	1	UniProt_human	H0YJH9	67	11076	1	1	1	1	0.45	Polyadenylate-binding protein 2 (Fragment) OS=Homo sapiens GN=PABPN1 PE=1 SV=1
516	1	UniProt_human	Q15645	67	48520	2	2	2	2	0.19	Pachytene checkpoint protein 2 homolog OS=Homo sapiens GN=TRIP13 PE=1 SV=2
517	1	UniProt_human	A0A087X1B7	66	8515	2	2	1	1	0.61	Chromatin target of PRMT1 protein OS=Homo sapiens GN=CHTOP PE=1 SV=1
518	1	UniProt_human	K7EQG1	66	13971	2	2	1	1	0.34	Glutaminyl-peptide cyclotransferase-like protein OS=Homo sapiens GN=QPCTL PE=1 SV=1
519	1	UniProt_human	H7C155	66	59703	1	1	1	1	0.07	RAF proto-oncogene serine/threonine-protein kinase (Fragment) OS=Homo sapiens GN=RAF1 PE=1 SV=1
520	1	UniProt_human	P13984	66	28363	1	1	1	1	0.16	General transcription factor IIF subunit 2 OS=Homo sapiens GN=GTF2F2 PE=1 SV=2
521	1	UniProt_human	Q8TB36	66	41320	2	2	2	2	0.23	Ganglioside-induced differentiation-associated protein 1 OS=Homo sapiens GN=GDAP1 PE=1 SV=3
522	1	UniProt_human	Q9NZZ3	66	24555	2	2	1	1	0.19	Charged multivesicular body protein 5 OS=Homo sapiens GN=CHMP5 PE=1 SV=1
523	1	UniProt_human	Q7L5D6	66	36481	1	1	1	1	0.12	Golgi to ER traffic protein 4 homolog OS=Homo sapiens GN=GET4 PE=1 SV=1
295	2	UniProt_human	P01911	65	29947	2	2	2	2	0.32	HLA class II histocompatibility antigen, DRB1-15 beta chain OS=Homo sapiens GN=HLA-DRB1 PE=1 SV=2
524	1	UniProt_human	Q9HBH5	65	36841	4	4	3	3	0.41	Retinol dehydrogenase 14 OS=Homo sapiens GN=RDH14 PE=1 SV=1
525	1	UniProt_human	E9PRZ0	65	18200	1	1	1	1	0.26	Dual-specificity mitogen-activated protein kinase kinase 3 (Fragment) OS=Homo sapiens GN=MAP2K3 PE=1 SV=2
526	1	UniProt_human	G3V2J8	64	20139	1	1	1	1	0.23	Heat shock protein HSP 90-alpha (Fragment) OS=Homo sapiens GN=HSP90AA1 PE=1 SV=1
527	1	UniProt_human	O14657	64	37955	4	4	3	3	0.4	Torsin-1B OS=Homo sapiens GN=TOR1B PE=1 SV=2
528	1	UniProt_human	A0A0A0MRJ7	64	252078	1	1	1	1	0.02	Coagulation factor V OS=Homo sapiens GN=F5 PE=1 SV=1
529	1	UniProt_human	G3V179	64	30794	3	3	2	2	0.31	Protein FAM118B OS=Homo sapiens GN=FAM118B PE=1 SV=1
530	1	UniProt_human	G3XAP5	64	26267	2	2	2	2	0.38	L-lactate dehydrogenase OS=Homo sapiens GN=LDHC PE=1 SV=1
531	1	UniProt_human	A0A087X271	63	19745	2	2	2	2	0.53	Calponin (Fragment) OS=Homo sapiens GN=CNN2 PE=1 SV=1
532	1	UniProt_human	P36551	63	50120	4	4	3	3	0.29	Oxygen-dependent coproporphyrinogen-III oxidase, mitochondrial OS=Homo sapiens GN=CPOX PE=1 SV=3
533	1	UniProt_human	Q14249	63	32600	2	2	2	2	0.29	Endonuclease G, mitochondrial OS=Homo sapiens GN=ENDOG PE=1 SV=4
534	1	UniProt_human	Q9Y679	63	52995	1	1	1	1	0.08	Ancient ubiquitous protein 1 OS=Homo sapiens GN=AUP1 PE=1 SV=1
535	1	UniProt_human	A0A140T8X5	63	40440	3	3	3	3	0.37	Serine/threonine-protein kinase 19 OS=Homo sapiens GN=STK19 PE=1 SV=1
536	1	UniProt_human	E9PPH5	63	13120	3	3	2	2	0.88	Acidic leucine-rich nuclear phosphoprotein 32 family member E (Fragment) OS=Homo sapiens GN=ANP32E PE=1 SV=1
537	1	UniProt_human	A0A075B6I0	63	12806	2	2	1	1	0.38	Protein IGLV8-61 (Fragment) OS=Homo sapiens GN=IGLV8-61 PE=1 SV=7
538	1	UniProt_human	O15121	63	37841	1	1	1	1	0.12	Sphingolipid delta(4)-desaturase DES1 OS=Homo sapiens GN=DEGS1 PE=1 SV=1
539	1	UniProt_human	F8WJN3	63	52238	1	1	1	1	0.08	Cleavage and polyadenylation-specificity factor subunit 6 OS=Homo sapiens GN=CPSF6 PE=1 SV=1
540	1	UniProt_human	M0QZM9	63	3756	2	2	1	1	1.77	Alpha-soluble NSF attachment protein OS=Homo sapiens GN=NAPA PE=1 SV=1
541	1	UniProt_human	E9PK80	63	35125	2	2	1	1	0.13	NAD-dependent protein deacetylase sirtuin-3, mitochondrial OS=Homo sapiens GN=SIRT3 PE=1 SV=1
542	1	UniProt_human	H3BNP3	62	9354	1	1	1	1	0.55	[3-methyl-2-oxobutanoate dehydrogenase [lipoamide]] kinase, mitochondrial (Fragment) OS=Homo sapiens GN=BCKDK PE=1 SV=1
543	1	UniProt_human	H7C2W1	62	14615	1	1	1	1	0.33	D-beta-hydroxybutyrate dehydrogenase, mitochondrial (Fragment) OS=Homo sapiens GN=BDH1 PE=1 SV=1
544	1	UniProt_human	A0A0J9YVW2	62	10685	1	1	1	1	0.47	Translin OS=Homo sapiens GN=TSN PE=1 SV=1
545	1	UniProt_human	A0A0A0MT59	62	26697	1	1	1	1	0.17	Mortality factor 4-like protein 2 OS=Homo sapiens GN=MORF4L2 PE=1 SV=1
546	1	UniProt_human	D6RGZ2	62	11055	1	1	1	1	0.45	THO complex subunit 3 OS=Homo sapiens GN=THOC3 PE=1 SV=1
547	1	UniProt_human	P31689	61	44839	3	3	2	2	0.21	DnaJ homolog subfamily A member 1 OS=Homo sapiens GN=DNAJA1 PE=1 SV=2
548	1	UniProt_human	H0Y9G6	61	40556	3	3	3	3	0.37	39S ribosomal protein L3, mitochondrial (Fragment) OS=Homo sapiens GN=MRPL3 PE=1 SV=1
549	1	UniProt_human	Q86T03	61	29450	4	4	2	2	0.33	Type 1 phosphatidylinositol 4,5-bisphosphate 4-phosphatase OS=Homo sapiens GN=TMEM55B PE=1 SV=1
550	1	UniProt_human	B0YIW6	61	61587	1	1	1	1	0.07	Archain 1, isoform CRA_a OS=Homo sapiens GN=ARCN1 PE=1 SV=1
551	1	UniProt_human	Q15691	61	29980	2	2	1	1	0.15	Microtubule-associated protein RP/EB family member 1 OS=Homo sapiens GN=MAPRE1 PE=1 SV=3
552	1	UniProt_human	Q8N3Z3	61	32126	3	3	3	3	0.48	GTP-binding protein 8 OS=Homo sapiens GN=GTPBP8 PE=2 SV=1
553	1	UniProt_human	P46926	61	32648	5	5	4	4	0.67	Glucosamine-6-phosphate isomerase 1 OS=Homo sapiens GN=GNPDA1 PE=1 SV=1
554	1	UniProt_human	Q96F92	61	28947	2	2	1	1	0.16	TAZ protein OS=Homo sapiens GN=TAZ PE=1 SV=1
555	1	UniProt_human	O75569	61	34383	3	3	3	3	0.44	Interferon-inducible double-stranded RNA-dependent protein kinase activator A OS=Homo sapiens GN=PRKRA PE=1 SV=1
556	1	UniProt_human	H7C1I0	60	38241	3	3	2	2	0.25	Solute carrier family 35 member E1 (Fragment) OS=Homo sapiens GN=SLC35E1 PE=1 SV=2
557	1	UniProt_human	A0A087WWH0	60	15204	2	2	1	1	0.31	60S ribosomal protein L17 (Fragment) OS=Homo sapiens GN=RPL17 PE=3 SV=6
558	1	UniProt_human	A0A0B4J1Z6	60	12549	1	1	1	1	0.39	Protein IGKV3-20 (Fragment) OS=Homo sapiens GN=IGKV3-20 PE=4 SV=1
559	1	UniProt_human	Q9H1D9	60	35661	1	1	1	1	0.13	DNA-directed RNA polymerase III subunit RPC6 OS=Homo sapiens GN=POLR3F PE=1 SV=1
560	1	UniProt_human	D6RAA6	60	25207	1	1	1	1	0.18	Transmembrane protein 33 (Fragment) OS=Homo sapiens GN=TMEM33 PE=1 SV=1
561	1	UniProt_human	B1ALM5	59	20945	2	2	2	2	0.49	Transmembrane protein 9 OS=Homo sapiens GN=TMEM9 PE=1 SV=1
562	1	UniProt_human	Q5TDE7	59	29286	1	1	1	1	0.15	E3 ubiquitin-protein ligase RNF220 (Fragment) OS=Homo sapiens GN=RNF220 PE=1 SV=1
563	1	UniProt_human	O95218	59	37382	1	1	1	1	0.12	Zinc finger Ran-binding domain-containing protein 2 OS=Homo sapiens GN=ZRANB2 PE=1 SV=2
564	1	UniProt_human	P40925	59	36403	3	3	3	3	0.41	Malate dehydrogenase, cytoplasmic OS=Homo sapiens GN=MDH1 PE=1 SV=4
565	1	UniProt_human	Q8TB61	59	47484	2	2	2	2	0.19	Adenosine 3'-phospho 5'-phosphosulfate transporter 1 OS=Homo sapiens GN=SLC35B2 PE=1 SV=1
566	1	UniProt_human	Q5T7C4	58	18299	3	3	2	2	0.58	High mobility group protein B1 OS=Homo sapiens GN=HMGB1 PE=1 SV=1
567	1	UniProt_human	J3KP90	57	33065	3	3	2	2	0.29	Cyclin-C OS=Homo sapiens GN=CCNC PE=1 SV=1
568	1	UniProt_human	Q5T9Q5	57	32019	1	1	1	1	0.14	Succinate--CoA ligase [ADP-forming] subunit beta, mitochondrial (Fragment) OS=Homo sapiens GN=SUCLA2 PE=1 SV=1
569	1	UniProt_human	Q5SZE2	57	15310	2	2	2	2	0.72	Ceramide synthase 2 (Fragment) OS=Homo sapiens GN=CERS2 PE=1 SV=8
570	1	UniProt_human	A0A0A0MSE2	57	42097	3	3	3	3	0.35	Hydroxyacyl-coenzyme A dehydrogenase, mitochondrial OS=Homo sapiens GN=HADH PE=1 SV=1
571	1	UniProt_human	H0Y9X1	57	27665	1	1	1	1	0.16	Translation machinery-associated protein 16 (Fragment) OS=Homo sapiens GN=TMA16 PE=1 SV=1
572	1	UniProt_human	J3KQL8	57	48885	1	1	1	1	0.09	Apolipoprotein L2 OS=Homo sapiens GN=APOL2 PE=1 SV=2
573	1	UniProt_human	H0YIE8	57	23510	1	1	1	1	0.19	WD repeat domain-containing protein 83 (Fragment) OS=Homo sapiens GN=WDR83 PE=1 SV=1
574	1	UniProt_human	Q5T5I6	57	31109	1	1	1	1	0.14	Golgi phosphoprotein 3-like (Fragment) OS=Homo sapiens GN=GOLPH3L PE=1 SV=1
575	1	UniProt_human	E7EQG2	57	41264	1	1	1	1	0.11	Eukaryotic initiation factor 4A-II OS=Homo sapiens GN=EIF4A2 PE=1 SV=1
576	1	UniProt_human	Q8TD19	56	107100	1	1	1	1	0.04	Serine/threonine-protein kinase Nek9 OS=Homo sapiens GN=NEK9 PE=1 SV=2
577	1	UniProt_human	H7C1J2	56	26447	1	1	1	1	0.17	Deoxynucleotidyltransferase terminal-interacting protein 1 (Fragment) OS=Homo sapiens GN=DNTTIP1 PE=1 SV=1
578	1	UniProt_human	H7C2Y5	56	19249	1	1	1	1	0.24	Uncharacterized protein (Fragment) OS=Homo sapiens PE=1 SV=8
579	1	UniProt_human	H0Y5H6	56	40196	1	1	1	1	0.11	Ubiquitin-associated protein 2-like (Fragment) OS=Homo sapiens GN=UBAP2L PE=1 SV=1
580	1	UniProt_human	P01613	56	12238	1	1	1	1	0.4	Ig kappa chain V-I region Ni OS=Homo sapiens PE=1 SV=1
581	1	UniProt_human	Q5JRI1	56	20900	1	1	1	1	0.22	Serine/arginine-rich-splicing factor 10 OS=Homo sapiens GN=SRSF10 PE=1 SV=1
582	1	UniProt_human	A0A087X1I3	56	56627	1	1	1	1	0.08	Succinate dehydrogenase [ubiquinone] flavoprotein subunit, mitochondrial OS=Homo sapiens GN=SDHA PE=1 SV=1
583	1	UniProt_human	Q9Y6H3	56	28063	1	1	1	1	0.16	Mitochondrial inner membrane protease ATP23 homolog OS=Homo sapiens GN=ATP23 PE=1 SV=3
584	1	UniProt_human	C9JCJ5	56	16953	2	2	1	1	0.28	Uncharacterized protein (Fragment) OS=Homo sapiens PE=4 SV=10
585	1	UniProt_human	S4R3V3	56	24893	1	1	1	1	0.18	YTH domain-containing family protein 2 (Fragment) OS=Homo sapiens GN=YTHDF2 PE=1 SV=1
586	1	UniProt_human	B8ZZ50	55	27202	1	1	1	1	0.17	Eukaryotic translation initiation factor 4E type 2 OS=Homo sapiens GN=EIF4E2 PE=1 SV=1
587	1	UniProt_human	E9PMM3	55	21152	2	2	2	2	0.48	Peroxisomal membrane protein PEX16 (Fragment) OS=Homo sapiens GN=PEX16 PE=1 SV=1
588	1	UniProt_human	P30040-2	55	5473	1	1	1	1	1.07	Isoform 2 of Endoplasmic reticulum resident protein 29 OS=Homo sapiens GN=ERP29
589	1	UniProt_human	H0Y9D8	55	25619	2	2	1	1	0.18	Inorganic pyrophosphatase 2, mitochondrial (Fragment) OS=Homo sapiens GN=PPA2 PE=1 SV=1
590	1	UniProt_human	A0A0J9YWR7	54	17024	1	1	1	1	0.28	Armadillo repeat-containing protein 10 (Fragment) OS=Homo sapiens GN=ARMC10 PE=1 SV=1
591	1	UniProt_human	A0A0C4DGK8	54	15928	1	1	1	1	0.3	DNA-(apurinic or apyrimidinic site) lyase (Fragment) OS=Homo sapiens GN=APEX1 PE=1 SV=1
592	1	UniProt_human	Q6NT16	54	48836	1	1	1	1	0.09	MFS-type transporter SLC18B1 OS=Homo sapiens GN=SLC18B1 PE=1 SV=1
593	1	UniProt_human	X6R8S9	54	11383	1	1	1	1	0.43	PITH domain-containing protein 1 OS=Homo sapiens GN=PITHD1 PE=1 SV=1
594	1	UniProt_human	Q9NX09	54	25355	2	2	1	1	0.18	DNA damage-inducible transcript 4 protein OS=Homo sapiens GN=DDIT4 PE=1 SV=1
595	1	UniProt_human	Q15526	54	33310	1	1	1	1	0.13	Surfeit locus protein 1 OS=Homo sapiens GN=SURF1 PE=1 SV=1
596	1	UniProt_human	H3BV98	54	17407	2	2	1	1	0.27	RISC-loading complex subunit TARBP2 (Fragment) OS=Homo sapiens GN=TARBP2 PE=1 SV=8
597	1	UniProt_human	Q9NSI2	54	25441	3	3	2	2	0.39	Protein FAM207A OS=Homo sapiens GN=FAM207A PE=1 SV=2
598	1	UniProt_human	Q92567	54	26168	1	1	1	1	0.17	Protein FAM168A OS=Homo sapiens GN=FAM168A PE=1 SV=2
599	1	UniProt_human	H7BXF3	54	15221	1	1	1	1	0.31	Transformer-2 protein homolog beta (Fragment) OS=Homo sapiens GN=TRA2B PE=1 SV=1
600	1	UniProt_human	Q9H4A6	54	33790	1	1	1	1	0.13	Golgi phosphoprotein 3 OS=Homo sapiens GN=GOLPH3 PE=1 SV=1
601	1	UniProt_human	Q99436	53	29946	1	1	1	1	0.15	Proteasome subunit beta type-7 OS=Homo sapiens GN=PSMB7 PE=1 SV=1
602	1	UniProt_human	P61978	53	50944	2	2	2	2	0.18	Heterogeneous nuclear ribonucleoprotein K OS=Homo sapiens GN=HNRNPK PE=1 SV=1
603	1	UniProt_human	Q96BQ5	53	30815	1	1	1	1	0.15	Coiled-coil domain-containing protein 127 OS=Homo sapiens GN=CCDC127 PE=1 SV=1
604	1	UniProt_human	P51570	53	42246	1	1	1	1	0.1	Galactokinase OS=Homo sapiens GN=GALK1 PE=1 SV=1
606	1	UniProt_human	A0A075B6F9	53	33410	1	1	1	1	0.13	Nitric oxide synthase-interacting protein OS=Homo sapiens GN=NOSIP PE=1 SV=1
607	1	UniProt_human	A0A0A0MRP0	53	90076	1	1	1	1	0.05	MAP7 domain-containing protein 3 (Fragment) OS=Homo sapiens GN=MAP7D3 PE=1 SV=1
608	1	UniProt_human	Q08426	53	79445	1	1	1	1	0.05	Peroxisomal bifunctional enzyme OS=Homo sapiens GN=EHHADH PE=1 SV=3
609	1	UniProt_human	U3KQ69	53	32591	1	1	1	1	0.14	Mitochondrial GTPase 1 OS=Homo sapiens GN=MTG1 PE=3 SV=1
610	1	UniProt_human	Q86Y82	52	31622	2	2	2	2	0.3	Syntaxin-12 OS=Homo sapiens GN=STX12 PE=1 SV=1
611	1	UniProt_human	Q7Z333	52	302689	1	1	1	1	0.01	Probable helicase senataxin OS=Homo sapiens GN=SETX PE=1 SV=4
612	1	UniProt_human	H0Y962	52	19808	1	1	1	1	0.24	Carbonyl reductase family member 4 (Fragment) OS=Homo sapiens GN=CBR4 PE=1 SV=1
613	1	UniProt_human	Q8N2A8	52	28255	1	1	1	1	0.16	Mitochondrial cardiolipin hydrolase OS=Homo sapiens GN=PLD6 PE=1 SV=1
614	1	UniProt_human	P0C2W1	52	30613	1	1	1	1	0.15	F-box/SPRY domain-containing protein 1 OS=Homo sapiens GN=FBXO45 PE=1 SV=1
615	1	UniProt_human	E9PR30	52	10898	1	1	1	1	0.46	40S ribosomal protein S30 OS=Homo sapiens GN=FAU PE=1 SV=1
616	1	UniProt_human	P46109	52	33756	1	1	1	1	0.13	Crk-like protein OS=Homo sapiens GN=CRKL PE=1 SV=1
617	1	UniProt_human	J3KS22	51	23789	1	1	1	1	0.19	L-xylulose reductase (Fragment) OS=Homo sapiens GN=DCXR PE=1 SV=8
618	1	UniProt_human	Q96E22	51	33203	1	1	1	1	0.14	Dehydrodolichyl diphosphate synthase complex subunit NUS1 OS=Homo sapiens GN=NUS1 PE=1 SV=1
619	1	UniProt_human	A0A0A0MRT6	51	51738	2	2	2	2	0.18	Abl interactor 1 OS=Homo sapiens GN=ABI1 PE=1 SV=1
620	1	UniProt_human	K7EQ99	51	10940	1	1	1	1	0.45	Glutaryl-CoA dehydrogenase, mitochondrial (Fragment) OS=Homo sapiens GN=GCDH PE=1 SV=1
621	1	UniProt_human	A0A087WTU1	51	67416	1	1	1	1	0.06	Leucine-rich repeat-containing protein 41 OS=Homo sapiens GN=LRRC41 PE=1 SV=1
622	1	UniProt_human	Q86UK7	51	98575	1	1	1	1	0.04	Zinc finger protein 598 OS=Homo sapiens GN=ZNF598 PE=1 SV=1
623	1	UniProt_human	J3KT29	51	13184	2	2	1	1	0.37	60S ribosomal protein L23 OS=Homo sapiens GN=RPL23 PE=1 SV=1
624	1	UniProt_human	Q96MG7	51	34287	1	1	1	1	0.13	Non-structural maintenance of chromosomes element 3 homolog OS=Homo sapiens GN=NSMCE3 PE=1 SV=1
625	1	UniProt_human	Q5SUY4	51	16005	2	2	2	2	0.68	Short-chain dehydrogenase/reductase 3 (Fragment) OS=Homo sapiens GN=DHRS3 PE=1 SV=1
605	1	UniProt_human	Q9NW81	50	29249	3	3	2	2	0.33	ATP synthase subunit s-like protein OS=Homo sapiens GN=ATP5SL PE=1 SV=3
626	1	UniProt_human	Q9BYB4	50	35595	2	2	2	2	0.27	Guanine nucleotide-binding protein subunit beta-like protein 1 OS=Homo sapiens GN=GNB1L PE=1 SV=2
627	1	UniProt_human	Q5JPT9	50	22195	1	1	1	1	0.21	Pyruvate dehydrogenase E1 component subunit alpha, somatic form, mitochondrial (Fragment) OS=Homo sapiens GN=PDHA1 PE=1 SV=8
628	1	UniProt_human	O60671	50	31807	1	1	1	1	0.14	Cell cycle checkpoint protein RAD1 OS=Homo sapiens GN=RAD1 PE=1 SV=1
629	1	UniProt_human	P02751	50	262460	1	1	1	1	0.02	Fibronectin OS=Homo sapiens GN=FN1 PE=1 SV=4
630	1	UniProt_human	A0A087X0X3	50	77518	1	1	1	1	0.06	Heterogeneous nuclear ribonucleoprotein M OS=Homo sapiens GN=HNRNPM PE=1 SV=1
631	1	UniProt_human	A0A0A0MRQ5	50	10670	1	1	1	1	0.47	Peroxiredoxin-1 OS=Homo sapiens GN=PRDX1 PE=1 SV=1
632	1	UniProt_human	P19623	50	33803	2	2	2	2	0.28	Spermidine synthase OS=Homo sapiens GN=SRM PE=1 SV=1
633	1	UniProt_human	Q9H490	50	50019	1	1	1	1	0.09	Phosphatidylinositol glycan anchor biosynthesis class U protein OS=Homo sapiens GN=PIGU PE=1 SV=3
634	1	UniProt_human	A0A087WW55	50	26605	1	1	1	1	0.17	Trypsin-1 OS=Homo sapiens GN=PRSS1 PE=1 SV=1
635	1	UniProt_human	A0A075B6Z2	50	2220	2	2	1	1	4.07	Protein TRAJ56 (Fragment) OS=Homo sapiens GN=TRAJ56 PE=4 SV=1
636	1	UniProt_human	A0A024R4M0	49	22578	3	3	3	3	0.75	40S ribosomal protein S9 OS=Homo sapiens GN=RPS9 PE=1 SV=1
637	1	UniProt_human	H0YB22	49	12935	1	1	1	1	0.37	40S ribosomal protein S14 (Fragment) OS=Homo sapiens GN=RPS14 PE=1 SV=1
638	1	UniProt_human	F6UXX1	49	20244	1	1	1	1	0.23	Heterogeneous nuclear ribonucleoprotein Q (Fragment) OS=Homo sapiens GN=SYNCRIP PE=1 SV=1
639	1	UniProt_human	H7BZP2	49	17084	1	1	1	1	0.28	Phosducin-like protein 3 (Fragment) OS=Homo sapiens GN=PDCL3 PE=1 SV=1
640	1	UniProt_human	P62269	48	17708	1	1	1	1	0.26	40S ribosomal protein S18 OS=Homo sapiens GN=RPS18 PE=1 SV=3
641	1	UniProt_human	Q96CS2-2	48	22730	1	1	1	1	0.2	Isoform 2 of HAUS augmin-like complex subunit 1 OS=Homo sapiens GN=HAUS1
642	1	UniProt_human	P15259	48	28748	2	2	2	2	0.34	Phosphoglycerate mutase 2 OS=Homo sapiens GN=PGAM2 PE=1 SV=3
643	1	UniProt_human	H3BNF5	48	23040	1	1	1	1	0.2	Y+L amino acid transporter 2 OS=Homo sapiens GN=SLC7A6 PE=1 SV=1
644	1	UniProt_human	A0A1B0GV23	48	43803	1	1	1	1	0.1	Cathepsin D OS=Homo sapiens GN=CTSD PE=4 SV=1
645	1	UniProt_human	H7C1S9	48	27505	1	1	1	1	0.16	Sideroflexin-5 (Fragment) OS=Homo sapiens GN=SFXN5 PE=1 SV=1
646	1	UniProt_human	H0YA79	47	23656	1	1	1	1	0.19	PRELI domain-containing protein 1, mitochondrial (Fragment) OS=Homo sapiens GN=PRELID1 PE=1 SV=1
647	1	UniProt_human	H0Y2W2	47	64315	1	1	1	1	0.07	ATPase family AAA domain-containing protein 3A (Fragment) OS=Homo sapiens GN=ATAD3A PE=1 SV=1
648	1	UniProt_human	I3L139	47	15632	1	1	1	1	0.3	Ketosamine-3-kinase OS=Homo sapiens GN=FN3KRP PE=1 SV=1
649	1	UniProt_human	F2Z388	47	10638	1	1	1	1	0.47	60S ribosomal protein L35 OS=Homo sapiens GN=RPL35 PE=1 SV=1
650	1	UniProt_human	A0A087WTZ8	47	17586	2	2	1	1	0.27	E3 SUMO-protein ligase NSE2 OS=Homo sapiens GN=NSMCE2 PE=1 SV=1
651	1	UniProt_human	A0A087X1P5	47	23541	1	1	1	1	0.19	COP9 signalosome complex subunit 7b OS=Homo sapiens GN=COPS7B PE=1 SV=1
652	1	UniProt_human	E7EM64	47	36041	2	2	2	2	0.26	COP9 signalosome complex subunit 6 OS=Homo sapiens GN=COPS6 PE=1 SV=1
653	1	UniProt_human	Q9UEU0	47	26672	1	1	1	1	0.17	Vesicle transport through interaction with t-SNAREs homolog 1B OS=Homo sapiens GN=VTI1B PE=1 SV=3
654	1	UniProt_human	A0A087WU14	47	23008	1	1	1	1	0.2	Secretory carrier-associated membrane protein 1 (Fragment) OS=Homo sapiens GN=SCAMP1 PE=1 SV=1
655	1	UniProt_human	H7BZX2	46	37799	1	1	1	1	0.12	Metalloendopeptidase OMA1, mitochondrial (Fragment) OS=Homo sapiens GN=OMA1 PE=1 SV=1
656	1	UniProt_human	E9PDQ8	46	41412	1	1	1	1	0.11	Succinate--CoA ligase [GDP-forming] subunit beta, mitochondrial OS=Homo sapiens GN=SUCLG2 PE=1 SV=1
657	1	UniProt_human	D6R9A6	46	15394	1	1	1	1	0.31	High mobility group protein B2 (Fragment) OS=Homo sapiens GN=HMGB2 PE=1 SV=1
658	1	UniProt_human	O43543	46	31936	1	1	1	1	0.14	DNA repair protein XRCC2 OS=Homo sapiens GN=XRCC2 PE=1 SV=1
659	1	UniProt_human	Q86SK9	46	37586	2	2	2	2	0.25	Stearoyl-CoA desaturase 5 OS=Homo sapiens GN=SCD5 PE=1 SV=2
660	1	UniProt_human	P27544	46	39510	1	1	1	1	0.11	Ceramide synthase 1 OS=Homo sapiens GN=CERS1 PE=1 SV=1
661	1	UniProt_human	C9J4K0	45	21343	1	1	1	1	0.22	Ashwin OS=Homo sapiens GN=C2orf49 PE=1 SV=1
662	1	UniProt_human	Q96L30	45	15155	1	1	1	1	0.31	SYNGR3 protein OS=Homo sapiens GN=SYNGR3 PE=1 SV=1
663	1	UniProt_human	E5RIW9	45	20735	1	1	1	1	0.22	Peroxisome biogenesis factor 2 (Fragment) OS=Homo sapiens GN=PEX2 PE=1 SV=8
664	1	UniProt_human	Q9UPY5	45	55387	1	1	1	1	0.08	Cystine/glutamate transporter OS=Homo sapiens GN=SLC7A11 PE=1 SV=1
665	1	UniProt_human	P55072	45	89266	2	2	2	2	0.1	Transitional endoplasmic reticulum ATPase OS=Homo sapiens GN=VCP PE=1 SV=4
159	2	UniProt_human	Q5SZL3	44	22757	2	2	2	2	0.44	TBC1 domain family member 7 (Fragment) OS=Homo sapiens GN=TBC1D7 PE=1 SV=1
666	1	UniProt_human	A0A087WU62	44	29329	2	2	2	2	0.33	39S ribosomal protein L45, mitochondrial OS=Homo sapiens GN=MRPL45 PE=1 SV=1
667	1	UniProt_human	K7ELC7	44	16460	1	1	1	1	0.29	60S ribosomal protein L27 (Fragment) OS=Homo sapiens GN=RPL27 PE=1 SV=1
668	1	UniProt_human	A0A024R4K9	44	35865	1	1	1	1	0.12	Transmembrane protein 120A OS=Homo sapiens GN=TMPIT PE=1 SV=1
669	1	UniProt_human	Q17RD7	44	72229	1	1	1	1	0.06	Synaptotagmin-16 OS=Homo sapiens GN=SYT16 PE=1 SV=2
670	1	UniProt_human	Q8NFQ8	44	51232	1	1	1	1	0.09	Torsin-1A-interacting protein 2 OS=Homo sapiens GN=TOR1AIP2 PE=1 SV=1
671	1	UniProt_human	Q86X76	43	35873	1	1	1	1	0.12	Nitrilase homolog 1 OS=Homo sapiens GN=NIT1 PE=1 SV=2
672	1	UniProt_human	K7EL65	43	12651	1	1	1	1	0.39	Inositol monophosphatase 2 OS=Homo sapiens GN=IMPA2 PE=1 SV=1
673	1	UniProt_human	H7C0D8	43	11922	1	1	1	1	0.41	Metalloreductase STEAP1 (Fragment) OS=Homo sapiens GN=STEAP1 PE=4 SV=1
674	1	UniProt_human	H0Y8K3	43	20973	1	1	1	1	0.22	Protein CDV3 homolog (Fragment) OS=Homo sapiens GN=CDV3 PE=1 SV=1
675	1	UniProt_human	Q9NY12	43	22334	1	1	1	1	0.21	H/ACA ribonucleoprotein complex subunit 1 OS=Homo sapiens GN=GAR1 PE=1 SV=1
676	1	UniProt_human	P49247	43	33248	1	1	1	1	0.13	Ribose-5-phosphate isomerase OS=Homo sapiens GN=RPIA PE=1 SV=3
677	1	UniProt_human	Q9Y5Z9	43	36808	1	1	1	1	0.12	UbiA prenyltransferase domain-containing protein 1 OS=Homo sapiens GN=UBIAD1 PE=1 SV=1
678	1	UniProt_human	H3BN34	42	5581	1	1	1	1	1.04	Pyruvate kinase PKM (Fragment) OS=Homo sapiens GN=PKM PE=1 SV=8
679	1	UniProt_human	K7EK06	42	18377	1	1	1	1	0.25	Phenylalanine--tRNA ligase alpha subunit (Fragment) OS=Homo sapiens GN=FARSA PE=1 SV=8
680	1	UniProt_human	Q5QPP1	42	21419	1	1	1	1	0.22	UDP-glucose 4-epimerase (Fragment) OS=Homo sapiens GN=GALE PE=1 SV=1
681	1	UniProt_human	F1DAL9	42	43870	1	1	1	1	0.1	COUP transcription factor 1 OS=Homo sapiens GN=NR2F1 PE=1 SV=1
682	1	UniProt_human	A0A0B4J231	42	23136	1	1	1	1	0.2	Immunoglobulin lambda-like polypeptide 5 OS=Homo sapiens GN=IGLL5 PE=1 SV=1
683	1	UniProt_human	Q14247	41	61549	2	2	2	2	0.15	Src substrate cortactin OS=Homo sapiens GN=CTTN PE=1 SV=2
684	1	UniProt_human	U3KQD2	41	14037	1	1	1	1	0.34	Protein GPR107 OS=Homo sapiens GN=GPR107 PE=1 SV=1
685	1	UniProt_human	Q9NS23	41	39194	1	1	1	1	0.11	Ras association domain-containing protein 1 OS=Homo sapiens GN=RASSF1 PE=1 SV=1
686	1	UniProt_human	Q9Y4X0	41	35440	2	2	2	2	0.27	AMME syndrome candidate gene 1 protein OS=Homo sapiens GN=AMMECR1 PE=1 SV=1
687	1	UniProt_human	Q9UFP1	41	63598	1	1	1	1	0.07	Protein FAM198A OS=Homo sapiens GN=FAM198A PE=1 SV=3
688	1	UniProt_human	H3BM54	41	16069	1	1	1	1	0.29	Methyltransferase-like protein 9 (Fragment) OS=Homo sapiens GN=METTL9 PE=1 SV=1
689	1	UniProt_human	I3L3W4	41	16213	2	2	1	1	0.29	ABI gene family member 3 (Fragment) OS=Homo sapiens GN=ABI3 PE=1 SV=1
690	1	UniProt_human	Q969F1	40	24033	1	1	1	1	0.19	General transcription factor 3C polypeptide 6 OS=Homo sapiens GN=GTF3C6 PE=1 SV=1
691	1	UniProt_human	H7C579	40	28727	1	1	1	1	0.16	Omega-amidase NIT2 (Fragment) OS=Homo sapiens GN=NIT2 PE=1 SV=8
692	1	UniProt_human	H3BLU7	40	34662	1	1	1	1	0.13	Aflatoxin B1 aldehyde reductase member 2 (Fragment) OS=Homo sapiens GN=AKR7A2 PE=1 SV=1
693	1	UniProt_human	P49427	40	26720	1	1	1	1	0.17	Ubiquitin-conjugating enzyme E2 R1 OS=Homo sapiens GN=CDC34 PE=1 SV=2
694	1	UniProt_human	B1AMW7	40	17679	1	1	1	1	0.27	Cell division cycle 7-related protein kinase (Fragment) OS=Homo sapiens GN=CDC7 PE=1 SV=1
695	1	UniProt_human	H0YBT9	40	15797	1	1	1	1	0.3	NADH dehydrogenase (ubiquinone) complex I, assembly factor 6 (Fragment) OS=Homo sapiens GN=NDUFAF6 PE=1 SV=1
696	1	UniProt_human	P40938	40	40530	1	1	1	1	0.11	Replication factor C subunit 3 OS=Homo sapiens GN=RFC3 PE=1 SV=2
697	1	UniProt_human	F8W0J4	39	20118	1	1	1	1	0.23	YEATS domain-containing protein 4 OS=Homo sapiens GN=YEATS4 PE=1 SV=1
698	1	UniProt_human	Q5H9R7	39	97608	1	1	1	1	0.04	Serine/threonine-protein phosphatase 6 regulatory subunit 3 OS=Homo sapiens GN=PPP6R3 PE=1 SV=2
699	1	UniProt_human	P68543	39	29260	1	1	1	1	0.15	UBX domain-containing protein 2A OS=Homo sapiens GN=UBXN2A PE=2 SV=1
700	1	UniProt_human	Q5SRD1	39	28030	1	1	1	1	0.16	Putative mitochondrial import inner membrane translocase subunit Tim23B OS=Homo sapiens GN=TIMM23B PE=5 SV=2
701	1	UniProt_human	M0R261	39	22982	1	1	1	1	0.2	6-phosphogluconolactonase (Fragment) OS=Homo sapiens GN=PGLS PE=1 SV=1
702	1	UniProt_human	H0YNC2	39	15815	1	1	1	1	0.3	Dehydrogenase/reductase (SDR family) member 1, isoform CRA_b OS=Homo sapiens GN=DHRS1 PE=1 SV=1
703	1	UniProt_human	A2A2G4	39	58309	1	1	1	1	0.08	Dolichyl pyrophosphate Man9GlcNAc2 alpha-1,3-glucosyltransferase OS=Homo sapiens GN=ALG6 PE=1 SV=1
704	1	UniProt_human	P00367	39	61359	2	2	2	2	0.15	Glutamate dehydrogenase 1, mitochondrial OS=Homo sapiens GN=GLUD1 PE=1 SV=2
705	1	UniProt_human	Q96L58	38	37114	1	1	1	1	0.12	Beta-1,3-galactosyltransferase 6 OS=Homo sapiens GN=B3GALT6 PE=1 SV=2
706	1	UniProt_human	O76050	38	61821	1	1	1	1	0.07	E3 ubiquitin-protein ligase NEURL1 OS=Homo sapiens GN=NEURL1 PE=2 SV=1
707	1	UniProt_human	E9PM91	38	12163	1	1	1	1	0.4	DNA polymerase delta subunit 3 (Fragment) OS=Homo sapiens GN=POLD3 PE=1 SV=1
708	1	UniProt_human	C9J3M3	38	23088	1	1	1	1	0.2	Myeloid leukemia factor 1 (Fragment) OS=Homo sapiens GN=MLF1 PE=1 SV=1
709	1	UniProt_human	Q9HBM6	38	27604	1	1	1	1	0.16	Transcription initiation factor TFIID subunit 9B OS=Homo sapiens GN=TAF9B PE=1 SV=1
710	1	UniProt_human	A0A0A0MRI7	38	26375	1	1	1	1	0.17	Protein ARV1 OS=Homo sapiens GN=ARV1 PE=1 SV=1
711	1	UniProt_human	E9PGQ0	38	36293	1	1	1	1	0.12	Solute carrier family 25 member 44 OS=Homo sapiens GN=SLC25A44 PE=1 SV=3
712	1	UniProt_human	P53384	38	34512	1	1	1	1	0.13	Cytosolic Fe-S cluster assembly factor NUBP1 OS=Homo sapiens GN=NUBP1 PE=1 SV=2
713	1	UniProt_human	A0A075B6S5	37	12703	1	1	1	1	0.39	Protein IGKV1-27 (Fragment) OS=Homo sapiens GN=IGKV1-27 PE=1 SV=1
714	1	UniProt_human	J3QT28	37	31684	1	1	1	1	0.14	Mitotic checkpoint protein BUB3 (Fragment) OS=Homo sapiens GN=BUB3 PE=1 SV=1
715	1	UniProt_human	Q92604	37	43061	1	1	1	1	0.1	Acyl-CoA:lysophosphatidylglycerol acyltransferase 1 OS=Homo sapiens GN=LPGAT1 PE=1 SV=1
716	1	UniProt_human	F6VZ39	37	13596	1	1	1	1	0.36	RNA-binding protein 38 OS=Homo sapiens GN=RBM38 PE=1 SV=1
717	1	UniProt_human	P46108	37	33810	1	1	1	1	0.13	Adapter molecule crk OS=Homo sapiens GN=CRK PE=1 SV=2
718	1	UniProt_human	A0A075B6H6	37	11713	1	1	1	1	0.42	Ig kappa chain C region (Fragment) OS=Homo sapiens GN=IGKC PE=1 SV=1
719	1	UniProt_human	P29508	37	44537	1	1	1	1	0.1	Serpin B3 OS=Homo sapiens GN=SERPINB3 PE=1 SV=2
720	1	UniProt_human	B4DVJ6	36	17099	1	1	1	1	0.28	cDNA FLJ57612, highly similar to mRNA decapping enzyme 1B (EC 3.-.-.-) OS=Homo sapiens GN=DCP1B PE=1 SV=1
721	1	UniProt_human	C9JAZ1	36	25701	2	2	1	1	0.18	Metaxin-2 (Fragment) OS=Homo sapiens GN=MTX2 PE=1 SV=1
722	1	UniProt_human	Q96CX2	36	35679	1	1	1	1	0.13	BTB/POZ domain-containing protein KCTD12 OS=Homo sapiens GN=KCTD12 PE=1 SV=1
723	1	UniProt_human	A0A087WUK2	36	40016	1	1	1	1	0.11	Heterogeneous nuclear ribonucleoprotein D-like OS=Homo sapiens GN=HNRNPDL PE=1 SV=1
724	1	UniProt_human	E5RGS2	36	28196	1	1	1	1	0.16	Receptor expression-enhancing protein OS=Homo sapiens GN=REEP4 PE=1 SV=1
725	1	UniProt_human	F2Z393	36	35306	1	1	1	1	0.13	Transaldolase OS=Homo sapiens GN=TALDO1 PE=1 SV=1
726	1	UniProt_human	Q8WUJ1	35	28671	1	1	1	1	0.16	Neuferricin OS=Homo sapiens GN=CYB5D2 PE=2 SV=1
727	1	UniProt_human	A0A087WT44	34	41643	1	1	1	1	0.11	Heme oxygenase 2 OS=Homo sapiens GN=HMOX2 PE=1 SV=1
728	1	UniProt_human	A0A0C4DFS8	34	41839	1	1	1	1	0.11	Nicotinamide phosphoribosyltransferase OS=Homo sapiens GN=NAMPT PE=1 SV=1
729	1	UniProt_human	D3DQ64	34	19768	1	1	1	1	0.24	Adenylate kinase 4, mitochondrial OS=Homo sapiens GN=AK4 PE=1 SV=1
730	1	UniProt_human	Q9NWZ8	34	28619	1	1	1	1	0.16	Gem-associated protein 8 OS=Homo sapiens GN=GEMIN8 PE=1 SV=1
731	1	UniProt_human	C9J016	34	17509	1	1	1	1	0.27	WD repeat-containing protein 54 (Fragment) OS=Homo sapiens GN=WDR54 PE=1 SV=8
732	1	UniProt_human	Q9NZL4	34	39449	1	1	1	1	0.11	Hsp70-binding protein 1 OS=Homo sapiens GN=HSPBP1 PE=1 SV=1
733	1	UniProt_human	Q9NVX0	34	26916	1	1	1	1	0.17	HAUS augmin-like complex subunit 2 OS=Homo sapiens GN=HAUS2 PE=1 SV=1
734	1	UniProt_human	A0A0A0MS19	33	64443	1	1	1	1	0.07	Dynein assembly factor 3, axonemal OS=Homo sapiens GN=DNAAF3 PE=1 SV=1
735	1	UniProt_human	A0A1B0GTK2	33	22991	1	1	1	1	0.2	Protein lin-28 homolog B (Fragment) OS=Homo sapiens GN=LIN28B PE=4 SV=1
736	1	UniProt_human	P26641	30	50087	1	1	1	1	0.09	Elongation factor 1-gamma OS=Homo sapiens GN=EEF1G PE=1 SV=3
737	1	UniProt_human	A0A075B6N8	30	41300	1	1	1	1	0.11	Ig gamma-3 chain C region (Fragment) OS=Homo sapiens GN=IGHG3 PE=1 SV=1
738	1	UniProt_human	I3L0M3	29	10050	1	1	1	1	0.5	MYC-associated zinc finger protein (Purine-binding transcription factor), isoform CRA_e OS=Homo sapiens GN=MAZ PE=1 SV=1
