# Supplementary material for: FER-mediated phosphorylation and PIK3R2 recruitment on IRS4 promotes AKT activation and tumorigenesis in ovarian cancer cells
Source: eLife. 2022 May 12;11:e76183. doi: 10.7554/eLife.76183 (PMC9098222; doi:10.7554/eLife.76183)
Supplement: Supplementary file 2. — Potential FER interactome between 37– and 50 kDa is shown in this file. [file elife-76183-supp2.xlsx]

## Sheet: Chris_37_50_results
Database	UniProt_human 20161004
Type of search	MS/MS Ion Search
Enzyme	Trypsin
Variable modifications	Deamidated (NQ),Oxidation (M),Phospho (ST),Phospho (Y)
Mass values	Monoisotopic
Protein mass	Unrestricted
Peptide mass tolerance	30 ppm
Fragment mass tolerance	0.3 Da
Max missed cleavages	1
Instrument type	ESI-QUAD
Number of queries	51074
Significance threshold p<	0.008101
Max. number of families	AUTO
Ions score or expect cut-off	0.008101
Preferred taxonomy	All entries
Show Percolator scores?	no
Family	Member	Database	Accession	Score	Mass	Num. of matches	Num. of significant matches	Num. of sequences	Num. of significant sequences	emPAI	Description
1	1	UniProt_human	Q5JP53	6373	47736	238	238	20	20	17.55	Tubulin beta chain OS=Homo sapiens GN=TUBB PE=1 SV=1
2	1	UniProt_human	P13645	6109	58792	180	180	34	34	44.23	Keratin, type I cytoskeletal 10 OS=Homo sapiens GN=KRT10 PE=1 SV=6
3	1	UniProt_human	H3BRG4	5568	44607	157	157	18	18	9.65	Cytochrome b-c1 complex subunit 2, mitochondrial OS=Homo sapiens GN=UQCRC2 PE=1 SV=1
1	2	UniProt_human	P68371	5504	49799	203	203	20	20	15.41	Tubulin beta-4B chain OS=Homo sapiens GN=TUBB4B PE=1 SV=1
4	1	UniProt_human	P35908	5381	65393	149	149	39	39	21.39	Keratin, type II cytoskeletal 2 epidermal OS=Homo sapiens GN=KRT2 PE=1 SV=2
1	3	UniProt_human	Q13885	5226	49875	188	188	19	19	11.73	Tubulin beta-2A chain OS=Homo sapiens GN=TUBB2A PE=1 SV=1
1	4	UniProt_human	Q9BVA1	5177	49921	187	187	19	19	11.65	Tubulin beta-2B chain OS=Homo sapiens GN=TUBB2B PE=1 SV=1
1	5	UniProt_human	A0A0B4J269	4447	88324	163	163	15	15	2.16	Uncharacterized protein OS=Homo sapiens PE=1 SV=1
5	1	UniProt_human	P31689	4407	44839	186	186	20	20	12.96	DnaJ homolog subfamily A member 1 OS=Homo sapiens GN=DNAJA1 PE=1 SV=2
6	1	UniProt_human	P60709	4249	41710	142	142	17	17	8.24	Actin, cytoplasmic 1 OS=Homo sapiens GN=ACTB PE=1 SV=1
7	1	UniProt_human	Q71U36	4101	50104	135	135	21	21	6.58	Tubulin alpha-1A chain OS=Homo sapiens GN=TUBA1A PE=1 SV=1
1	6	UniProt_human	P04350	3833	49554	171	171	19	19	10.88	Tubulin beta-4A chain OS=Homo sapiens GN=TUBB4A PE=1 SV=2
4	2	UniProt_human	P04264	3833	65999	128	128	34	34	14.75	Keratin, type II cytoskeletal 1 OS=Homo sapiens GN=KRT1 PE=1 SV=6
9	1	UniProt_human	P49411	3578	49510	135	135	26	26	14.35	Elongation factor Tu, mitochondrial OS=Homo sapiens GN=TUFM PE=1 SV=2
2	2	UniProt_human	P35527	3503	62027	101	101	31	31	11.48	Keratin, type I cytoskeletal 9 OS=Homo sapiens GN=KRT9 PE=1 SV=3
10	1	UniProt_human	Q9Y230	3487	51125	111	111	23	23	9.1	RuvB-like 2 OS=Homo sapiens GN=RUVBL2 PE=1 SV=3
11	1	UniProt_human	P06576	3409	56525	110	110	25	25	9.98	ATP synthase subunit beta, mitochondrial OS=Homo sapiens GN=ATP5B PE=1 SV=3
7	2	UniProt_human	P68366	3184	49892	108	108	17	17	4.45	Tubulin alpha-4A chain OS=Homo sapiens GN=TUBA4A PE=1 SV=1
8	1	UniProt_human	A0A087WVQ9	3134	47853	128	128	15	15	3.11	Elongation factor 1-alpha 1 OS=Homo sapiens GN=EEF1A1 PE=1 SV=1
1	7	UniProt_human	Q9BUF5	3099	49825	135	135	17	17	6.03	Tubulin beta-6 chain OS=Homo sapiens GN=TUBB6 PE=1 SV=1
12	1	UniProt_human	G8JLB6	2676	51197	80	80	9	9	1.93	Heterogeneous nuclear ribonucleoprotein H OS=Homo sapiens GN=HNRNPH1 PE=1 SV=1
8	2	UniProt_human	Q05639	2468	50438	102	102	12	12	1.74	Elongation factor 1-alpha 2 OS=Homo sapiens GN=EEF1A2 PE=1 SV=1
13	1	UniProt_human	P19474	2459	54135	113	113	19	19	5.51	E3 ubiquitin-protein ligase TRIM21 OS=Homo sapiens GN=TRIM21 PE=1 SV=1
14	1	UniProt_human	P60842	2427	46125	81	81	19	19	6.48	Eukaryotic initiation factor 4A-I OS=Homo sapiens GN=EIF4A1 PE=1 SV=1
15	1	UniProt_human	P25705	2317	59714	69	69	23	23	5.31	ATP synthase subunit alpha, mitochondrial OS=Homo sapiens GN=ATP5A1 PE=1 SV=1
2	3	UniProt_human	P02533	2316	51529	78	78	22	22	10.73	Keratin, type I cytoskeletal 14 OS=Homo sapiens GN=KRT14 PE=1 SV=4
12	2	UniProt_human	P52597	2266	45643	63	63	9	9	2.33	Heterogeneous nuclear ribonucleoprotein F OS=Homo sapiens GN=HNRNPF PE=1 SV=3
16	1	UniProt_human	Q9UBB4	2240	53455	69	69	18	18	4.26	Ataxin-10 OS=Homo sapiens GN=ATXN10 PE=1 SV=1
17	1	UniProt_human	P06748	2211	32555	68	68	13	13	5.96	Nucleophosmin OS=Homo sapiens GN=NPM1 PE=1 SV=2
18	1	UniProt_human	P50454	2157	46411	80	80	22	22	7.11	Serpin H1 OS=Homo sapiens GN=SERPINH1 PE=1 SV=2
19	1	UniProt_human	O75600	2138	45256	40	40	6	6	1.11	2-amino-3-ketobutyrate coenzyme A ligase, mitochondrial OS=Homo sapiens GN=GCAT PE=1 SV=1
20	1	UniProt_human	P11310-2	2130	46990	86	86	20	20	9.37	Isoform 2 of Medium-chain specific acyl-CoA dehydrogenase, mitochondrial OS=Homo sapiens GN=ACADM
6	2	UniProt_human	P68032	2067	41992	94	94	16	16	5.76	Actin, alpha cardiac muscle 1 OS=Homo sapiens GN=ACTC1 PE=1 SV=1
21	1	UniProt_human	Q15645	2000	48520	79	79	15	15	5.23	Pachytene checkpoint protein 2 homolog OS=Homo sapiens GN=TRIP13 PE=1 SV=2
22	1	UniProt_human	P06733	1961	47139	51	51	16	16	4.01	Alpha-enolase OS=Homo sapiens GN=ENO1 PE=1 SV=2
23	1	UniProt_human	P62195	1919	45597	66	66	19	19	5.37	26S protease regulatory subunit 8 OS=Homo sapiens GN=PSMC5 PE=1 SV=1
24	1	UniProt_human	Q92947	1840	48096	55	55	8	8	1.87	Glutaryl-CoA dehydrogenase, mitochondrial OS=Homo sapiens GN=GCDH PE=1 SV=1
25	1	UniProt_human	P51570	1796	42246	51	51	15	15	3.94	Galactokinase OS=Homo sapiens GN=GALK1 PE=1 SV=1
26	1	UniProt_human	Q9P2R7	1761	50285	77	77	21	21	5.91	Succinate--CoA ligase [ADP-forming] subunit beta, mitochondrial OS=Homo sapiens GN=SUCLA2 PE=1 SV=3
27	1	UniProt_human	P26641	1755	50087	86	86	16	16	3.2	Elongation factor 1-gamma OS=Homo sapiens GN=EEF1G PE=1 SV=3
7	3	UniProt_human	C9J2C0	1744	51952	61	61	12	12	2.39	Tubulin alpha chain (Fragment) OS=Homo sapiens GN=TUBA8 PE=1 SV=1
28	1	UniProt_human	Q9UBS4	1726	40489	58	58	14	14	4.29	DnaJ homolog subfamily B member 11 OS=Homo sapiens GN=DNAJB11 PE=1 SV=1
29	1	UniProt_human	B4DY09	1724	38886	56	56	15	15	4.68	Interleukin enhancer-binding factor 2 OS=Homo sapiens GN=ILF2 PE=1 SV=1
30	1	UniProt_human	Q13561	1716	44204	60	60	20	20	6.44	Dynactin subunit 2 OS=Homo sapiens GN=DCTN2 PE=1 SV=4
2	4	UniProt_human	P08779	1678	51236	61	61	23	23	8.26	Keratin, type I cytoskeletal 16 OS=Homo sapiens GN=KRT16 PE=1 SV=4
31	1	UniProt_human	Q9Y679	1641	52995	51	51	9	9	1.22	Ancient ubiquitous protein 1 OS=Homo sapiens GN=AUP1 PE=1 SV=1
32	1	UniProt_human	P23258	1635	51138	51	51	17	17	3.42	Tubulin gamma-1 chain OS=Homo sapiens GN=TUBG1 PE=1 SV=2
33	1	UniProt_human	P35998	1631	48603	70	70	19	19	4.69	26S protease regulatory subunit 7 OS=Homo sapiens GN=PSMC2 PE=1 SV=3
34	1	UniProt_human	O00303	1557	37540	45	45	11	11	2.85	Eukaryotic translation initiation factor 3 subunit F OS=Homo sapiens GN=EIF3F PE=1 SV=1
35	1	UniProt_human	O60884	1553	45717	65	65	15	15	4.27	DnaJ homolog subfamily A member 2 OS=Homo sapiens GN=DNAJA2 PE=1 SV=1
36	1	UniProt_human	O75306	1511	52512	60	60	15	15	2.93	NADH dehydrogenase [ubiquinone] iron-sulfur protein 2, mitochondrial OS=Homo sapiens GN=NDUFS2 PE=1 SV=2
37	1	UniProt_human	A0A0C4DG17	1410	33293	37	37	10	10	3.02	40S ribosomal protein SA OS=Homo sapiens GN=RPSA PE=1 SV=1
38	1	UniProt_human	Q96EY1	1370	52456	47	47	14	14	2.09	DnaJ homolog subfamily A member 3, mitochondrial OS=Homo sapiens GN=DNAJA3 PE=1 SV=2
39	1	UniProt_human	O75190	1366	36065	36	36	8	8	2.21	DnaJ homolog subfamily B member 6 OS=Homo sapiens GN=DNAJB6 PE=1 SV=2
38	2	UniProt_human	Q96EY1-2	1356	49580	43	43	13	13	2.03	Isoform 2 of DnaJ homolog subfamily A member 3, mitochondrial OS=Homo sapiens GN=DNAJA3
40	1	UniProt_human	Q6NXE6	1335	54107	39	39	13	13	1.76	Armadillo repeat-containing protein 6 OS=Homo sapiens GN=ARMC6 PE=1 SV=2
41	1	UniProt_human	Q3ZCQ8	1331	39622	42	42	10	10	1.9	Mitochondrial import inner membrane translocase subunit TIM50 OS=Homo sapiens GN=TIMM50 PE=1 SV=2
42	1	UniProt_human	R4GNH3	1297	47322	48	48	16	16	3.57	26S protease regulatory subunit 6A OS=Homo sapiens GN=PSMC3 PE=1 SV=1
43	1	UniProt_human	P67809	1279	35903	33	33	10	10	2.24	Nuclease-sensitive element-binding protein 1 OS=Homo sapiens GN=YBX1 PE=1 SV=3
23	2	UniProt_human	P43686	1237	47337	46	46	17	17	3.99	26S protease regulatory subunit 6B OS=Homo sapiens GN=PSMC4 PE=1 SV=2
39	2	UniProt_human	A0A0J9YX62	1229	36635	33	33	8	8	2.16	DnaJ homolog subfamily B member 6 OS=Homo sapiens GN=DNAJB6 PE=1 SV=1
44	1	UniProt_human	P60228	1213	52187	57	57	18	18	4.48	Eukaryotic translation initiation factor 3 subunit E OS=Homo sapiens GN=EIF3E PE=1 SV=1
45	1	UniProt_human	P39023	1195	46080	64	64	18	18	6.51	60S ribosomal protein L3 OS=Homo sapiens GN=RPL3 PE=1 SV=2
46	1	UniProt_human	A0A0C4DGS1	1194	48769	46	46	13	13	2.37	Dolichyl-diphosphooligosaccharide--protein glycosyltransferase 48 kDa subunit OS=Homo sapiens GN=DDOST PE=1 SV=1
47	1	UniProt_human	E9PC15	1194	43770	51	51	13	13	3.68	Acylglycerol kinase, mitochondrial OS=Homo sapiens GN=AGK PE=1 SV=1
14	2	UniProt_human	E7EQG2	1193	41264	39	39	10	10	2.08	Eukaryotic initiation factor 4A-II OS=Homo sapiens GN=EIF4A2 PE=1 SV=1
48	1	UniProt_human	O95433	1188	38250	52	52	12	12	5.5	Activator of 90 kDa heat shock protein ATPase homolog 1 OS=Homo sapiens GN=AHSA1 PE=1 SV=1
49	1	UniProt_human	P61163	1171	42587	25	25	7	7	1	Alpha-centractin OS=Homo sapiens GN=ACTR1A PE=1 SV=1
50	1	UniProt_human	Q9BTY7	1147	42103	31	31	11	11	2.01	Protein HGH1 homolog OS=Homo sapiens GN=HGH1 PE=1 SV=1
51	1	UniProt_human	Q15366	1142	38556	32	32	9	9	2.72	Poly(rC)-binding protein 2 OS=Homo sapiens GN=PCBP2 PE=1 SV=1
52	1	UniProt_human	Q8IUF1	1134	44007	35	35	13	13	2.84	COBW domain-containing protein 2 OS=Homo sapiens GN=CBWD2 PE=2 SV=1
53	1	UniProt_human	P61160	1125	44732	43	43	10	10	1.82	Actin-related protein 2 OS=Homo sapiens GN=ACTR2 PE=1 SV=1
54	1	UniProt_human	Q6NUK1	1106	53320	45	45	22	22	5.2	Calcium-binding mitochondrial carrier protein SCaMC-1 OS=Homo sapiens GN=SLC25A24 PE=1 SV=2
52	2	UniProt_human	Q9BRT8	1101	44041	34	34	13	13	2.82	COBW domain-containing protein 1 OS=Homo sapiens GN=CBWD1 PE=2 SV=1
55	1	UniProt_human	O15269	1083	52710	43	43	14	14	2.07	Serine palmitoyltransferase 1 OS=Homo sapiens GN=SPTLC1 PE=1 SV=1
12	3	UniProt_human	P55795	1079	49232	45	45	7	7	0.99	Heterogeneous nuclear ribonucleoprotein H2 OS=Homo sapiens GN=HNRNPH2 PE=1 SV=1
56	1	UniProt_human	A0A087X0B7	1079	47268	36	36	13	13	2.19	Synaptosomal-associated protein 47 OS=Homo sapiens GN=SNAP47 PE=1 SV=1
57	1	UniProt_human	P36578	1070	47667	57	57	13	13	2.78	60S ribosomal protein L4 OS=Homo sapiens GN=RPL4 PE=1 SV=5
6	3	UniProt_human	Q562R1	1067	41976	34	34	7	7	1.47	Beta-actin-like protein 2 OS=Homo sapiens GN=ACTBL2 PE=1 SV=2
58	1	UniProt_human	A0A087WZN1	1047	42384	59	59	15	15	3.45	Isocitrate dehydrogenase [NAD] subunit, mitochondrial OS=Homo sapiens GN=IDH3B PE=1 SV=1
59	1	UniProt_human	P09543	1014	47549	53	53	18	18	4.92	2',3'-cyclic-nucleotide 3'-phosphodiesterase OS=Homo sapiens GN=CNP PE=1 SV=2
60	1	UniProt_human	P08559-3	1001	40162	27	27	11	11	2.17	Isoform 3 of Pyruvate dehydrogenase E1 component subunit alpha, somatic form, mitochondrial OS=Homo sapiens GN=PDHA1
61	1	UniProt_human	Q9UJZ1	995	38510	32	32	12	12	3.15	Stomatin-like protein 2, mitochondrial OS=Homo sapiens GN=STOML2 PE=1 SV=1
62	1	UniProt_human	P04181	993	48504	35	35	15	15	2.69	Ornithine aminotransferase, mitochondrial OS=Homo sapiens GN=OAT PE=1 SV=1
63	1	UniProt_human	O43615	972	51323	36	36	18	18	3.41	Mitochondrial import inner membrane translocase subunit TIM44 OS=Homo sapiens GN=TIMM44 PE=1 SV=2
64	1	UniProt_human	P31153	960	43633	39	39	11	11	2.52	S-adenosylmethionine synthase isoform type-2 OS=Homo sapiens GN=MAT2A PE=1 SV=1
65	1	UniProt_human	A0A087X2I1	939	45768	35	35	11	11	2.03	26S protease regulatory subunit 10B OS=Homo sapiens GN=PSMC6 PE=1 SV=1
4	3	UniProt_human	P02538	929	60008	44	44	19	19	3.39	Keratin, type II cytoskeletal 6A OS=Homo sapiens GN=KRT6A PE=1 SV=3
66	1	UniProt_human	O95396	917	49638	34	34	12	12	1.78	Adenylyltransferase and sulfurtransferase MOCS3 OS=Homo sapiens GN=MOCS3 PE=1 SV=1
67	1	UniProt_human	P04406	915	36030	32	32	9	9	2.21	Glyceraldehyde-3-phosphate dehydrogenase OS=Homo sapiens GN=GAPDH PE=1 SV=3
68	1	UniProt_human	Q9BRX2	904	43332	38	38	16	16	3.76	Protein pelota homolog OS=Homo sapiens GN=PELO PE=1 SV=2
69	1	UniProt_human	O94905	893	37815	28	28	13	13	3.25	Erlin-2 OS=Homo sapiens GN=ERLIN2 PE=1 SV=1
4	4	UniProt_human	P04259	880	60030	43	43	17	17	2.81	Keratin, type II cytoskeletal 6B OS=Homo sapiens GN=KRT6B PE=1 SV=5
70	1	UniProt_human	Q9BZE1	869	48087	34	34	12	12	1.87	39S ribosomal protein L37, mitochondrial OS=Homo sapiens GN=MRPL37 PE=1 SV=2
71	1	UniProt_human	Q8WVX9	868	59319	38	38	17	17	2.88	Fatty acyl-CoA reductase 1 OS=Homo sapiens GN=FAR1 PE=1 SV=1
72	1	UniProt_human	P78318	866	39198	32	32	10	10	1.93	Immunoglobulin-binding protein 1 OS=Homo sapiens GN=IGBP1 PE=1 SV=1
73	1	UniProt_human	P05141	852	32831	40	40	10	10	2.6	ADP/ATP translocase 2 OS=Homo sapiens GN=SLC25A5 PE=1 SV=7
74	1	UniProt_human	Q9Y312	840	43444	30	30	11	11	1.91	Protein AAR2 homolog OS=Homo sapiens GN=AAR2 PE=1 SV=2
64	2	UniProt_human	P31153-2	830	32944	32	32	10	10	3.07	Isoform 2 of S-adenosylmethionine synthase isoform type-2 OS=Homo sapiens GN=MAT2A
4	5	UniProt_human	P13647	824	62340	48	48	21	21	3.76	Keratin, type II cytoskeletal 5 OS=Homo sapiens GN=KRT5 PE=1 SV=3
12	4	UniProt_human	D6RIT2	817	18355	33	33	5	5	5.17	Heterogeneous nuclear ribonucleoprotein H (Fragment) OS=Homo sapiens GN=HNRNPH1 PE=1 SV=1
75	1	UniProt_human	A0A140T921	814	41180	27	27	11	11	2.79	HLA class I histocompatibility antigen, Cw-6 alpha chain OS=Homo sapiens GN=HLA-C PE=1 SV=1
76	1	UniProt_human	Q14558-2	813	42440	25	25	10	10	1.99	Isoform 2 of Phosphoribosyl pyrophosphate synthase-associated protein 1 OS=Homo sapiens GN=PRPSAP1
77	1	UniProt_human	P31350	812	44849	22	22	10	10	1.56	Ribonucleoside-diphosphate reductase subunit M2 OS=Homo sapiens GN=RRM2 PE=1 SV=1
78	1	UniProt_human	P12277	808	42617	21	21	10	10	2.28	Creatine kinase B-type OS=Homo sapiens GN=CKB PE=1 SV=1
79	1	UniProt_human	P35249	805	39657	32	32	14	14	3.44	Replication factor C subunit 4 OS=Homo sapiens GN=RFC4 PE=1 SV=2
80	1	UniProt_human	Q99536	805	41893	29	29	11	11	2.35	Synaptic vesicle membrane protein VAT-1 homolog OS=Homo sapiens GN=VAT1 PE=1 SV=2
81	1	UniProt_human	Q6KCM7-2	803	55362	34	34	14	14	2.14	Isoform 2 of Calcium-binding mitochondrial carrier protein SCaMC-2 OS=Homo sapiens GN=SLC25A25
82	1	UniProt_human	P35613	773	42174	26	26	7	7	1.01	Basigin OS=Homo sapiens GN=BSG PE=1 SV=2
83	1	UniProt_human	Q9BXW7	772	46292	27	27	10	10	1.49	Cat eye syndrome critical region protein 5 OS=Homo sapiens GN=CECR5 PE=1 SV=1
84	1	UniProt_human	Q92734	757	43421	21	21	10	10	1.91	Protein TFG OS=Homo sapiens GN=TFG PE=1 SV=2
73	2	UniProt_human	P12236	755	32845	34	34	9	9	2.17	ADP/ATP translocase 3 OS=Homo sapiens GN=SLC25A6 PE=1 SV=4
85	1	UniProt_human	Q9NXS2	747	42897	27	27	10	10	1.68	Glutaminyl-peptide cyclotransferase-like protein OS=Homo sapiens GN=QPCTL PE=1 SV=2
51	2	UniProt_human	Q15365	743	37474	21	21	8	8	2.07	Poly(rC)-binding protein 1 OS=Homo sapiens GN=PCBP1 PE=1 SV=2
86	1	UniProt_human	Q9BT22	742	52484	26	26	8	8	0.9	Chitobiosyldiphosphodolichol beta-mannosyltransferase OS=Homo sapiens GN=ALG1 PE=1 SV=2
87	1	UniProt_human	O14929	738	49481	20	20	5	5	0.53	Histone acetyltransferase type B catalytic subunit OS=Homo sapiens GN=HAT1 PE=1 SV=1
88	1	UniProt_human	O43542	738	37826	25	25	10	10	2.4	DNA repair protein XRCC3 OS=Homo sapiens GN=XRCC3 PE=1 SV=1
89	1	UniProt_human	Q15120	737	46909	29	29	15	15	2.85	[Pyruvate dehydrogenase (acetyl-transferring)] kinase isozyme 3, mitochondrial OS=Homo sapiens GN=PDK3 PE=1 SV=1
90	1	UniProt_human	G5E9V5	729	41183	28	28	12	12	2.79	28S ribosomal protein S22, mitochondrial OS=Homo sapiens GN=MRPS22 PE=1 SV=1
91	1	UniProt_human	P41091	719	51077	24	24	10	10	1.29	Eukaryotic translation initiation factor 2 subunit 3 OS=Homo sapiens GN=EIF2S3 PE=1 SV=3
92	1	UniProt_human	O43347	719	39099	22	22	8	8	1.64	RNA-binding protein Musashi homolog 1 OS=Homo sapiens GN=MSI1 PE=1 SV=1
93	1	UniProt_human	O75616	714	48319	25	25	11	11	1.86	GTPase Era, mitochondrial OS=Homo sapiens GN=ERAL1 PE=1 SV=2
94	1	UniProt_human	Q14247	708	61549	25	25	9	9	0.99	Src substrate cortactin OS=Homo sapiens GN=CTTN PE=1 SV=2
95	1	UniProt_human	Q9H974	706	46683	22	22	7	7	0.88	Queuine tRNA-ribosyltransferase accessory subunit OS=Homo sapiens GN=QTRTD1 PE=1 SV=1
96	1	UniProt_human	Q96I99	702	46481	30	30	14	14	2.9	Succinate--CoA ligase [GDP-forming] subunit beta, mitochondrial OS=Homo sapiens GN=SUCLG2 PE=1 SV=2
97	1	UniProt_human	O14733	702	47454	43	43	13	13	2.47	Dual specificity mitogen-activated protein kinase kinase 7 OS=Homo sapiens GN=MAP2K7 PE=1 SV=2
82	2	UniProt_human	P35613-3	695	19426	23	23	7	7	3.5	Isoform 3 of Basigin OS=Homo sapiens GN=BSG
98	1	UniProt_human	P45954	692	47455	31	31	15	15	2.79	Short/branched chain specific acyl-CoA dehydrogenase, mitochondrial OS=Homo sapiens GN=ACADSB PE=1 SV=1
73	3	UniProt_human	P12235	685	33043	29	29	8	8	1.77	ADP/ATP translocase 1 OS=Homo sapiens GN=SLC25A4 PE=1 SV=4
2	5	UniProt_human	Q04695	683	48076	33	33	15	15	3.46	Keratin, type I cytoskeletal 17 OS=Homo sapiens GN=KRT17 PE=1 SV=2
26	2	UniProt_human	A0A0U1RRI1	683	11266	30	30	6	6	12	Succinate--CoA ligase [ADP-forming] subunit beta, mitochondrial (Fragment) OS=Homo sapiens GN=SUCLA2 PE=1 SV=1
99	1	UniProt_human	Q96GD4	681	39286	28	28	13	13	3.03	Aurora kinase B OS=Homo sapiens GN=AURKB PE=1 SV=3
100	1	UniProt_human	Q9HCU5	679	45440	21	21	9	9	1.53	Prolactin regulatory element-binding protein OS=Homo sapiens GN=PREB PE=1 SV=2
101	1	UniProt_human	E9PKE3	678	68763	30	30	19	19	2.43	Heat shock cognate 71 kDa protein OS=Homo sapiens GN=HSPA8 PE=1 SV=1
102	1	UniProt_human	Q15008	678	45502	31	31	13	13	2.34	26S proteasome non-ATPase regulatory subunit 6 OS=Homo sapiens GN=PSMD6 PE=1 SV=1
76	2	UniProt_human	O60256	677	40899	24	24	10	10	1.81	Phosphoribosyl pyrophosphate synthase-associated protein 2 OS=Homo sapiens GN=PRPSAP2 PE=1 SV=1
103	1	UniProt_human	Q9Y295	663	40517	18	18	9	9	1.83	Developmentally-regulated GTP-binding protein 1 OS=Homo sapiens GN=DRG1 PE=1 SV=1
4	6	UniProt_human	P05787	653	53671	29	29	16	16	2.52	Keratin, type II cytoskeletal 8 OS=Homo sapiens GN=KRT8 PE=1 SV=7
104	1	UniProt_human	P55084	643	51262	30	30	14	14	2.17	Trifunctional enzyme subunit beta, mitochondrial OS=Homo sapiens GN=HADHB PE=1 SV=3
105	1	UniProt_human	O00232	638	52871	21	21	10	10	1.23	26S proteasome non-ATPase regulatory subunit 12 OS=Homo sapiens GN=PSMD12 PE=1 SV=3
106	1	UniProt_human	P35250	631	39132	15	15	8	8	1.37	Replication factor C subunit 2 OS=Homo sapiens GN=RFC2 PE=1 SV=3
107	1	UniProt_human	E7EU96	628	45282	30	30	12	12	2.06	Casein kinase II subunit alpha OS=Homo sapiens GN=CSNK2A1 PE=1 SV=1
108	1	UniProt_human	Q9UH62	619	42474	15	15	8	8	1.21	Armadillo repeat-containing X-linked protein 3 OS=Homo sapiens GN=ARMCX3 PE=1 SV=1
109	1	UniProt_human	Q9Y3F4	614	38414	23	23	11	11	2.34	Serine-threonine kinase receptor-associated protein OS=Homo sapiens GN=STRAP PE=1 SV=1
110	1	UniProt_human	P40938	609	40530	27	27	13	13	3.29	Replication factor C subunit 3 OS=Homo sapiens GN=RFC3 PE=1 SV=2
111	1	UniProt_human	O00151	602	36049	24	24	10	10	3.06	PDZ and LIM domain protein 1 OS=Homo sapiens GN=PDLIM1 PE=1 SV=4
112	1	UniProt_human	Q9NV79	599	41046	39	39	9	9	1.79	Protein-L-isoaspartate O-methyltransferase domain-containing protein 2 OS=Homo sapiens GN=PCMTD2 PE=2 SV=2
113	1	UniProt_human	J3KPS3	596	39793	19	19	12	12	2.97	Fructose-bisphosphate aldolase OS=Homo sapiens GN=ALDOA PE=1 SV=1
114	1	UniProt_human	O75821	588	35589	31	31	10	10	2.26	Eukaryotic translation initiation factor 3 subunit G OS=Homo sapiens GN=EIF3G PE=1 SV=2
5	2	UniProt_human	F5H170	587	24361	19	19	2	2	0.68	DnaJ homolog subfamily A member 4 OS=Homo sapiens GN=DNAJA4 PE=1 SV=1
115	1	UniProt_human	Q6YN16	586	45366	29	29	15	15	3.04	Hydroxysteroid dehydrogenase-like protein 2 OS=Homo sapiens GN=HSDL2 PE=1 SV=1
116	1	UniProt_human	Q15118	581	49213	23	23	10	10	1.36	[Pyruvate dehydrogenase (acetyl-transferring)] kinase isozyme 1, mitochondrial OS=Homo sapiens GN=PDK1 PE=1 SV=1
117	1	UniProt_human	P51553	581	42767	23	23	8	8	1.2	Isocitrate dehydrogenase [NAD] subunit gamma, mitochondrial OS=Homo sapiens GN=IDH3G PE=1 SV=1
118	1	UniProt_human	Q15019	581	41461	18	18	10	10	1.76	Septin-2 OS=Homo sapiens GN=SEPT2 PE=1 SV=1
14	3	UniProt_human	P38919	579	46841	22	22	11	11	1.7	Eukaryotic initiation factor 4A-III OS=Homo sapiens GN=EIF4A3 PE=1 SV=4
119	1	UniProt_human	P12532	576	47007	21	21	10	10	1.69	Creatine kinase U-type, mitochondrial OS=Homo sapiens GN=CKMT1A PE=1 SV=1
120	1	UniProt_human	P48735	568	50877	29	29	14	14	2.2	Isocitrate dehydrogenase [NADP], mitochondrial OS=Homo sapiens GN=IDH2 PE=1 SV=2
121	1	UniProt_human	O00231	567	47434	32	32	17	17	3.55	26S proteasome non-ATPase regulatory subunit 11 OS=Homo sapiens GN=PSMD11 PE=1 SV=3
122	1	UniProt_human	P51665	564	37002	21	21	10	10	2.13	26S proteasome non-ATPase regulatory subunit 7 OS=Homo sapiens GN=PSMD7 PE=1 SV=2
123	1	UniProt_human	O15160	563	39225	16	16	8	8	1.37	DNA-directed RNA polymerases I and III subunit RPAC1 OS=Homo sapiens GN=POLR1C PE=1 SV=1
124	1	UniProt_human	P22234	563	47049	25	25	11	11	1.68	Multifunctional protein ADE2 OS=Homo sapiens GN=PAICS PE=1 SV=3
125	1	UniProt_human	O14654	561	133685	26	26	15	15	0.61	Insulin receptor substrate 4 OS=Homo sapiens GN=IRS4 PE=1 SV=1
43	2	UniProt_human	P16989	546	40066	16	16	4	4	0.52	Y-box-binding protein 3 OS=Homo sapiens GN=YBX3 PE=1 SV=4
126	1	UniProt_human	J3KNA0	542	55234	31	31	7	7	0.84	Mitochondrial inner membrane protein OXA1L OS=Homo sapiens GN=OXA1L PE=1 SV=1
127	1	UniProt_human	P51991	533	39571	17	17	8	8	1.61	Heterogeneous nuclear ribonucleoprotein A3 OS=Homo sapiens GN=HNRNPA3 PE=1 SV=2
128	1	UniProt_human	Q9GZT4	528	36543	17	17	8	8	1.52	Serine racemase OS=Homo sapiens GN=SRR PE=1 SV=1
129	1	UniProt_human	Q8NBX0	528	47121	15	15	8	8	1.05	Saccharopine dehydrogenase-like oxidoreductase OS=Homo sapiens GN=SCCPDH PE=1 SV=1
114	2	UniProt_human	K7EL20	525	29265	26	26	9	9	2.63	Eukaryotic translation initiation factor 3 subunit G (Fragment) OS=Homo sapiens GN=EIF3G PE=1 SV=8
130	1	UniProt_human	Q00577	525	34889	14	14	8	8	1.63	Transcriptional activator protein Pur-alpha OS=Homo sapiens GN=PURA PE=1 SV=2
2	6	UniProt_human	P05783	523	48029	28	28	16	16	3.08	Keratin, type I cytoskeletal 18 OS=Homo sapiens GN=KRT18 PE=1 SV=2
131	1	UniProt_human	B2R5W2	521	31929	21	21	11	11	3.25	Heterogeneous nuclear ribonucleoproteins C1/C2 OS=Homo sapiens GN=HNRNPC PE=1 SV=1
132	1	UniProt_human	Q9H5Q4	519	45320	41	41	16	16	3.44	Dimethyladenosine transferase 2, mitochondrial OS=Homo sapiens GN=TFB2M PE=1 SV=1
133	1	UniProt_human	Q8N0Z6	512	48897	19	19	10	10	1.37	Tetratricopeptide repeat protein 5 OS=Homo sapiens GN=TTC5 PE=1 SV=2
134	1	UniProt_human	A0A0C4DGB6	507	69181	14	14	4	4	0.28	Serum albumin OS=Homo sapiens GN=ALB PE=1 SV=1
135	1	UniProt_human	Q15293	505	38866	16	16	6	6	1.14	Reticulocalbin-1 OS=Homo sapiens GN=RCN1 PE=1 SV=1
136	1	UniProt_human	Q9HDC9	505	46451	23	23	10	10	1.72	Adipocyte plasma membrane-associated protein OS=Homo sapiens GN=APMAP PE=1 SV=2
137	1	UniProt_human	H7C2Q8	502	40659	22	22	9	9	1.55	EBNA1 binding protein 2, isoform CRA_d OS=Homo sapiens GN=EBNA1BP2 PE=1 SV=1
138	1	UniProt_human	O75439	501	54331	15	15	10	10	1.18	Mitochondrial-processing peptidase subunit beta OS=Homo sapiens GN=PMPCB PE=1 SV=2
139	1	UniProt_human	O43813	499	45254	30	30	8	8	1.54	LanC-like protein 1 OS=Homo sapiens GN=LANCL1 PE=1 SV=1
140	1	UniProt_human	Q8TCT9	498	41462	23	23	7	7	1.25	Minor histocompatibility antigen H13 OS=Homo sapiens GN=HM13 PE=1 SV=1
141	1	UniProt_human	P10809	496	61016	18	18	12	12	1.3	60 kDa heat shock protein, mitochondrial OS=Homo sapiens GN=HSPD1 PE=1 SV=2
142	1	UniProt_human	O60547	495	41923	25	25	11	11	2.34	GDP-mannose 4,6 dehydratase OS=Homo sapiens GN=GMDS PE=1 SV=1
143	1	UniProt_human	D6RAX7	491	47696	16	16	10	10	1.42	COP9 constitutive photomorphogenic-like protein subunit 4 isoform 2 OS=Homo sapiens GN=COPS4 PE=1 SV=1
144	1	UniProt_human	P56589	490	42113	17	17	7	7	1.23	Peroxisomal biogenesis factor 3 OS=Homo sapiens GN=PEX3 PE=1 SV=1
145	1	UniProt_human	O43639	482	42889	21	21	10	10	1.68	Cytoplasmic protein NCK2 OS=Homo sapiens GN=NCK2 PE=1 SV=2
22	2	UniProt_human	E5RGZ4	480	30384	7	7	2	2	0.32	Beta-enolase (Fragment) OS=Homo sapiens GN=ENO3 PE=1 SV=1
146	1	UniProt_human	P37268	479	48084	14	14	8	8	1.02	Squalene synthase OS=Homo sapiens GN=FDFT1 PE=1 SV=1
2	7	UniProt_human	P19012	475	49181	27	27	9	9	1.17	Keratin, type I cytoskeletal 15 OS=Homo sapiens GN=KRT15 PE=1 SV=3
147	1	UniProt_human	P61962	474	38901	14	14	7	7	1.14	DDB1- and CUL4-associated factor 7 OS=Homo sapiens GN=DCAF7 PE=1 SV=1
148	1	UniProt_human	P53985	465	53909	21	21	6	6	0.73	Monocarboxylate transporter 1 OS=Homo sapiens GN=SLC16A1 PE=1 SV=3
149	1	UniProt_human	Q9H9P8	455	50284	17	17	9	9	1.13	L-2-hydroxyglutarate dehydrogenase, mitochondrial OS=Homo sapiens GN=L2HGDH PE=1 SV=3
150	1	UniProt_human	E9PRY8	451	76523	15	15	7	7	0.65	Elongation factor 1-delta OS=Homo sapiens GN=EEF1D PE=1 SV=1
4	7	UniProt_human	Q7Z794	444	61864	23	23	8	8	0.85	Keratin, type II cytoskeletal 1b OS=Homo sapiens GN=KRT77 PE=2 SV=3
151	1	UniProt_human	J9JIC5	444	44581	15	15	8	8	1.13	Protein Njmu-R1 OS=Homo sapiens GN=C17orf75 PE=1 SV=1
152	1	UniProt_human	Q9UBE0	443	38426	13	13	7	7	1.16	SUMO-activating enzyme subunit 1 OS=Homo sapiens GN=SAE1 PE=1 SV=1
153	1	UniProt_human	Q15084	442	48091	11	11	7	7	0.85	Protein disulfide-isomerase A6 OS=Homo sapiens GN=PDIA6 PE=1 SV=1
154	1	UniProt_human	O43175	441	56614	15	15	9	9	0.96	D-3-phosphoglycerate dehydrogenase OS=Homo sapiens GN=PHGDH PE=1 SV=4
155	1	UniProt_human	Q7L0Y3	431	47317	18	18	9	9	1.23	Mitochondrial ribonuclease P protein 1 OS=Homo sapiens GN=TRMT10C PE=1 SV=2
156	1	UniProt_human	Q02878	430	32708	16	16	12	12	3.67	60S ribosomal protein L6 OS=Homo sapiens GN=RPL6 PE=1 SV=3
157	1	UniProt_human	H3BSM7	428	50751	12	12	6	6	0.65	RUS1 family protein C16orf58 OS=Homo sapiens GN=C16orf58 PE=1 SV=1
158	1	UniProt_human	Q9H553	426	47061	13	13	6	6	0.71	Alpha-1,3/1,6-mannosyltransferase ALG2 OS=Homo sapiens GN=ALG2 PE=1 SV=1
101	2	UniProt_human	A0A0G2JIW1	423	70066	19	19	12	12	1.2	Heat shock 70 kDa protein 1B OS=Homo sapiens GN=HSPA1B PE=1 SV=1
159	1	UniProt_human	J3QKK3	422	38814	14	14	7	7	1.14	DNA repair protein RAD51 homolog 3 OS=Homo sapiens GN=RAD51C PE=1 SV=1
160	1	UniProt_human	B3KS98	414	41555	27	27	9	9	1.76	Eukaryotic translation initiation factor 3 subunit H OS=Homo sapiens GN=EIF3H PE=1 SV=1
161	1	UniProt_human	H7C2I1	414	42434	26	26	14	14	3.03	Protein arginine N-methyltransferase 1 OS=Homo sapiens GN=PRMT1 PE=1 SV=1
162	1	UniProt_human	Q14012	412	41311	15	15	7	7	1.04	Calcium/calmodulin-dependent protein kinase type 1 OS=Homo sapiens GN=CAMK1 PE=1 SV=1
163	1	UniProt_human	P49674	409	47285	19	19	8	8	1.23	Casein kinase I isoform epsilon OS=Homo sapiens GN=CSNK1E PE=1 SV=1
164	1	UniProt_human	Q9UBM7	408	54454	15	15	5	5	0.59	7-dehydrocholesterol reductase OS=Homo sapiens GN=DHCR7 PE=1 SV=1
165	1	UniProt_human	Q8NDZ4	407	49450	11	11	6	6	0.67	Deleted in autism protein 1 OS=Homo sapiens GN=C3orf58 PE=1 SV=1
166	1	UniProt_human	Q7L2H7	403	42476	15	15	8	8	1.21	Eukaryotic translation initiation factor 3 subunit M OS=Homo sapiens GN=EIF3M PE=1 SV=1
167	1	UniProt_human	Q13347	397	36479	17	17	8	8	1.52	Eukaryotic translation initiation factor 3 subunit I OS=Homo sapiens GN=EIF3I PE=1 SV=1
168	1	UniProt_human	P36507	396	44396	21	21	10	10	1.59	Dual specificity mitogen-activated protein kinase kinase 2 OS=Homo sapiens GN=MAP2K2 PE=1 SV=1
169	1	UniProt_human	Q7LGA3	396	41854	13	13	4	4	0.66	Heparan sulfate 2-O-sulfotransferase 1 OS=Homo sapiens GN=HS2ST1 PE=1 SV=1
170	1	UniProt_human	Q9BWF3	390	40289	16	16	9	9	1.57	RNA-binding protein 4 OS=Homo sapiens GN=RBM4 PE=1 SV=1
171	1	UniProt_human	Q9H0S4	389	50615	17	17	9	9	1.12	Probable ATP-dependent RNA helicase DDX47 OS=Homo sapiens GN=DDX47 PE=1 SV=1
2	8	UniProt_human	Q7Z3Y8	388	49792	20	20	4	4	0.81	Keratin, type I cytoskeletal 27 OS=Homo sapiens GN=KRT27 PE=1 SV=2
172	1	UniProt_human	Q9BS26	387	46941	23	23	9	9	1.46	Endoplasmic reticulum resident protein 44 OS=Homo sapiens GN=ERP44 PE=1 SV=1
173	1	UniProt_human	A0A087WUL9	386	42712	16	16	10	10	1.68	26S proteasome non-ATPase regulatory subunit 13 OS=Homo sapiens GN=PSMD13 PE=1 SV=1
174	1	UniProt_human	Q9Y305	382	49870	21	21	13	13	2.01	Acyl-coenzyme A thioesterase 9, mitochondrial OS=Homo sapiens GN=ACOT9 PE=1 SV=2
175	1	UniProt_human	O43505	381	47089	13	13	6	6	0.71	Beta-1,4-glucuronyltransferase 1 OS=Homo sapiens GN=B4GAT1 PE=1 SV=1
176	1	UniProt_human	G5EA06	381	41303	20	20	11	11	2.08	28S ribosomal protein S27, mitochondrial OS=Homo sapiens GN=MRPS27 PE=1 SV=1
177	1	UniProt_human	E9PJM3	380	49121	11	11	6	6	0.67	F-box only protein 3 OS=Homo sapiens GN=FBXO3 PE=1 SV=1
178	1	UniProt_human	H0Y6E7	379	31837	18	18	6	6	1.21	RNA-binding motif protein, X chromosome (Fragment) OS=Homo sapiens GN=RBMX PE=1 SV=2
179	1	UniProt_human	Q9BTV4	379	44847	14	14	7	7	0.93	Transmembrane protein 43 OS=Homo sapiens GN=TMEM43 PE=1 SV=1
180	1	UniProt_human	Q13838	378	48960	18	18	7	7	0.83	Spliceosome RNA helicase DDX39B OS=Homo sapiens GN=DDX39B PE=1 SV=1
181	1	UniProt_human	Q15738	377	41874	10	10	4	4	0.5	Sterol-4-alpha-carboxylate 3-dehydrogenase, decarboxylating OS=Homo sapiens GN=NSDHL PE=1 SV=2
163	2	UniProt_human	H7BYT1	375	49033	16	16	6	6	0.83	Casein kinase I isoform delta OS=Homo sapiens GN=CSNK1D PE=1 SV=2
182	1	UniProt_human	U3KQK0	374	18792	8	8	2	2	0.56	Histone H2B OS=Homo sapiens GN=HIST1H2BN PE=1 SV=1
183	1	UniProt_human	P00367	373	61359	20	20	14	14	1.63	Glutamate dehydrogenase 1, mitochondrial OS=Homo sapiens GN=GLUD1 PE=1 SV=2
184	1	UniProt_human	P78406	372	40942	13	13	6	6	0.86	mRNA export factor OS=Homo sapiens GN=RAE1 PE=1 SV=1
185	1	UniProt_human	Q9HA92	371	48683	15	15	6	6	0.68	Radical S-adenosyl methionine domain-containing protein 1, mitochondrial OS=Homo sapiens GN=RSAD1 PE=2 SV=2
186	1	UniProt_human	P16591	371	94578	15	15	7	7	0.37	Tyrosine-protein kinase Fer OS=Homo sapiens GN=FER PE=1 SV=2
187	1	UniProt_human	A0A0A0MR05	369	36017	10	10	3	3	0.42	Target of rapamycin complex subunit LST8 OS=Homo sapiens GN=MLST8 PE=1 SV=1
188	1	UniProt_human	F5GYQ1	368	44631	9	9	5	5	0.6	V-type proton ATPase subunit d 1 OS=Homo sapiens GN=ATP6V0D1 PE=1 SV=1
189	1	UniProt_human	J3KPS0	368	45462	21	21	12	12	2.34	DnaJ (Hsp40) homolog, subfamily B, member 12, isoform CRA_c OS=Homo sapiens GN=DNAJB12 PE=1 SV=1
190	1	UniProt_human	F5H5P2	365	54169	15	15	7	7	0.73	Uncharacterized protein OS=Homo sapiens PE=4 SV=1
191	1	UniProt_human	Q7L1Q6	364	48013	29	29	16	16	3.46	Basic leucine zipper and W2 domain-containing protein 1 OS=Homo sapiens GN=BZW1 PE=1 SV=1
192	1	UniProt_human	A0A087WWF6	360	54661	8	8	4	4	0.36	DNA polymerase delta subunit 2 OS=Homo sapiens GN=POLD2 PE=1 SV=1
180	2	UniProt_human	O00148	357	49098	16	16	7	7	0.83	ATP-dependent RNA helicase DDX39A OS=Homo sapiens GN=DDX39A PE=1 SV=2
193	1	UniProt_human	Q7Z6J8	357	43628	13	13	7	7	0.97	E3 ubiquitin-protein ligase E3D OS=Homo sapiens GN=UBE3D PE=1 SV=2
194	1	UniProt_human	Q14254	354	47035	12	12	8	8	1.05	Flotillin-2 OS=Homo sapiens GN=FLOT2 PE=1 SV=2
195	1	UniProt_human	E9PF19	354	45906	8	8	6	6	0.74	Transducin beta-like protein 2 OS=Homo sapiens GN=TBL2 PE=1 SV=1
196	1	UniProt_human	P23526	354	47685	16	16	8	8	1.03	Adenosylhomocysteinase OS=Homo sapiens GN=AHCY PE=1 SV=4
127	2	UniProt_human	P22626	353	37407	13	13	7	7	1.2	Heterogeneous nuclear ribonucleoproteins A2/B1 OS=Homo sapiens GN=HNRNPA2B1 PE=1 SV=2
4	8	UniProt_human	B0YJC4	352	49623	17	17	12	12	1.78	Vimentin OS=Homo sapiens GN=VIM PE=1 SV=1
75	2	UniProt_human	A0A140T913	352	41423	16	16	7	7	1.5	HLA class I histocompatibility antigen, A-3 alpha chain OS=Homo sapiens GN=HLA-A PE=1 SV=1
197	1	UniProt_human	Q9NX58	351	43588	12	12	7	7	0.97	Cell growth-regulating nucleolar protein OS=Homo sapiens GN=LYAR PE=1 SV=2
198	1	UniProt_human	P51398	350	45538	11	11	6	6	0.74	28S ribosomal protein S29, mitochondrial OS=Homo sapiens GN=DAP3 PE=1 SV=1
199	1	UniProt_human	Q14103	348	38410	23	23	13	13	3.17	Heterogeneous nuclear ribonucleoprotein D0 OS=Homo sapiens GN=HNRNPD PE=1 SV=1
200	1	UniProt_human	Q9Y383	346	46486	20	20	9	9	1.26	Putative RNA-binding protein Luc7-like 2 OS=Homo sapiens GN=LUC7L2 PE=1 SV=2
201	1	UniProt_human	Q9Y5X3	346	46787	17	17	10	10	1.7	Sorting nexin-5 OS=Homo sapiens GN=SNX5 PE=1 SV=1
202	1	UniProt_human	X6RA30	344	33870	14	14	6	6	1.11	Cell division cycle protein 123 homolog OS=Homo sapiens GN=CDC123 PE=1 SV=1
203	1	UniProt_human	Q9UET6	342	36056	7	7	3	3	0.42	Putative tRNA (cytidine(32)/guanosine(34)-2'-O)-methyltransferase OS=Homo sapiens GN=FTSJ1 PE=1 SV=2
69	2	UniProt_human	O75477	340	38901	12	12	7	7	1.14	Erlin-1 OS=Homo sapiens GN=ERLIN1 PE=1 SV=1
204	1	UniProt_human	P40937	339	38472	10	10	7	7	1.15	Replication factor C subunit 5 OS=Homo sapiens GN=RFC5 PE=1 SV=1
205	1	UniProt_human	Q16543	334	44440	18	18	9	9	1.35	Hsp90 co-chaperone Cdc37 OS=Homo sapiens GN=CDC37 PE=1 SV=1
206	1	UniProt_human	Q9NZJ7	333	41517	18	18	8	8	1.25	Mitochondrial carrier homolog 1 OS=Homo sapiens GN=MTCH1 PE=1 SV=1
4	9	UniProt_human	Q5XKE5	332	57800	14	14	6	6	0.67	Keratin, type II cytoskeletal 79 OS=Homo sapiens GN=KRT79 PE=1 SV=2
207	1	UniProt_human	P22830	332	47832	14	14	6	6	0.7	Ferrochelatase, mitochondrial OS=Homo sapiens GN=FECH PE=1 SV=2
208	1	UniProt_human	Q9Y697	332	50164	18	18	13	13	1.99	Cysteine desulfurase, mitochondrial OS=Homo sapiens GN=NFS1 PE=1 SV=3
209	1	UniProt_human	P05455	329	46808	13	13	10	10	1.46	Lupus La protein OS=Homo sapiens GN=SSB PE=1 SV=2
210	1	UniProt_human	P50502	328	41305	16	16	6	6	0.85	Hsc70-interacting protein OS=Homo sapiens GN=ST13 PE=1 SV=2
211	1	UniProt_human	Q9BQA1	327	36701	12	12	5	5	0.77	Methylosome protein 50 OS=Homo sapiens GN=WDR77 PE=1 SV=1
212	1	UniProt_human	Q15417	326	36391	13	13	6	6	1	Calponin-3 OS=Homo sapiens GN=CNN3 PE=1 SV=1
7	4	UniProt_human	A6NHL2	322	49877	13	13	4	4	0.4	Tubulin alpha chain-like 3 OS=Homo sapiens GN=TUBAL3 PE=1 SV=2
213	1	UniProt_human	J3KP15	321	15362	7	7	3	3	1.25	Serine/arginine-rich-splicing factor 2 (Fragment) OS=Homo sapiens GN=SRSF2 PE=1 SV=8
214	1	UniProt_human	P20042	320	38364	13	13	7	7	1.16	Eukaryotic translation initiation factor 2 subunit 2 OS=Homo sapiens GN=EIF2S2 PE=1 SV=2
215	1	UniProt_human	A0A087WX29	319	26726	8	8	3	3	0.87	TAR DNA-binding protein 43 (Fragment) OS=Homo sapiens GN=TARDBP PE=1 SV=1
216	1	UniProt_human	M0R0I0	318	24611	8	8	4	4	0.97	BRISC and BRCA1-A complex member 1 (Fragment) OS=Homo sapiens GN=BABAM1 PE=1 SV=1
217	1	UniProt_human	P31930	317	52612	10	10	6	6	0.62	Cytochrome b-c1 complex subunit 1, mitochondrial OS=Homo sapiens GN=UQCRC1 PE=1 SV=3
77	2	UniProt_human	A0A0C4DGZ6	316	34466	8	8	4	4	0.63	Ribonucleoside-diphosphate reductase subunit M2 B OS=Homo sapiens GN=RRM2B PE=1 SV=1
218	1	UniProt_human	O00442	316	39311	9	9	6	6	0.9	RNA 3'-terminal phosphate cyclase OS=Homo sapiens GN=RTCA PE=1 SV=1
219	1	UniProt_human	Q96GC9	314	46208	12	12	3	3	0.44	Vacuole membrane protein 1 OS=Homo sapiens GN=VMP1 PE=1 SV=1
220	1	UniProt_human	Q92643	313	45223	11	11	7	7	0.92	GPI-anchor transamidase OS=Homo sapiens GN=PIGK PE=1 SV=2
221	1	UniProt_human	Q8TDN6	312	41375	16	16	7	7	1.04	Ribosome biogenesis protein BRX1 homolog OS=Homo sapiens GN=BRIX1 PE=1 SV=2
222	1	UniProt_human	E7ESZ7	312	44710	11	11	8	8	1.13	NADH dehydrogenase [ubiquinone] 1 alpha subcomplex subunit 10, mitochondrial OS=Homo sapiens GN=NDUFA10 PE=1 SV=1
223	1	UniProt_human	Q8N2K0	311	45068	14	14	7	7	0.93	Monoacylglycerol lipase ABHD12 OS=Homo sapiens GN=ABHD12 PE=1 SV=2
4	10	UniProt_human	Q6KB66	310	50494	10	10	4	4	0.4	Keratin, type II cytoskeletal 80 OS=Homo sapiens GN=KRT80 PE=1 SV=2
224	1	UniProt_human	D6RF48	309	35399	13	13	10	10	2.7	Syntaxin-18 OS=Homo sapiens GN=STX18 PE=1 SV=1
225	1	UniProt_human	Q07021	309	31343	7	7	2	2	0.31	Complement component 1 Q subcomponent-binding protein, mitochondrial OS=Homo sapiens GN=C1QBP PE=1 SV=1
226	1	UniProt_human	P13861	305	45490	15	15	10	10	1.53	cAMP-dependent protein kinase type II-alpha regulatory subunit OS=Homo sapiens GN=PRKAR2A PE=1 SV=2
227	1	UniProt_human	P24752	303	45171	13	13	8	8	1.11	Acetyl-CoA acetyltransferase, mitochondrial OS=Homo sapiens GN=ACAT1 PE=1 SV=1
228	1	UniProt_human	P55072	302	89266	16	16	10	10	0.61	Transitional endoplasmic reticulum ATPase OS=Homo sapiens GN=VCP PE=1 SV=4
229	1	UniProt_human	Q15758	301	56562	13	13	5	5	0.45	Neutral amino acid transporter B(0) OS=Homo sapiens GN=SLC1A5 PE=1 SV=2
230	1	UniProt_human	A0A087WZZ9	301	25820	15	15	6	6	1.65	Cyclin-dependent kinase 1 OS=Homo sapiens GN=CDK1 PE=1 SV=1
231	1	UniProt_human	Q02978	299	34040	10	10	6	6	1.1	Mitochondrial 2-oxoglutarate/malate carrier protein OS=Homo sapiens GN=SLC25A11 PE=1 SV=3
232	1	UniProt_human	Q99729-3	299	30569	14	14	8	8	2.01	Isoform 3 of Heterogeneous nuclear ribonucleoprotein A/B OS=Homo sapiens GN=HNRNPAB
233	1	UniProt_human	A0A087X0X3	299	77518	13	13	8	8	0.55	Heterogeneous nuclear ribonucleoprotein M OS=Homo sapiens GN=HNRNPM PE=1 SV=1
234	1	UniProt_human	O96019	299	47430	10	10	6	6	0.71	Actin-like protein 6A OS=Homo sapiens GN=ACTL6A PE=1 SV=1
235	1	UniProt_human	P41240	299	50672	10	10	6	6	0.65	Tyrosine-protein kinase CSK OS=Homo sapiens GN=CSK PE=1 SV=1
236	1	UniProt_human	F8VPD4	296	235873	13	13	6	6	0.11	CAD protein OS=Homo sapiens GN=CAD PE=1 SV=1
237	1	UniProt_human	Q9UJS0	295	74129	13	13	10	10	0.77	Calcium-binding mitochondrial carrier protein Aralar2 OS=Homo sapiens GN=SLC25A13 PE=1 SV=2
75	3	UniProt_human	P30492	294	40355	10	10	7	7	1.3	HLA class I histocompatibility antigen, B-54 alpha chain OS=Homo sapiens GN=HLA-B PE=1 SV=1
238	1	UniProt_human	Q9Y276	294	47504	7	7	5	5	0.56	Mitochondrial chaperone BCS1 OS=Homo sapiens GN=BCS1L PE=1 SV=1
49	2	UniProt_human	P42025	293	42267	11	11	7	7	1.01	Beta-centractin OS=Homo sapiens GN=ACTR1B PE=1 SV=1
239	1	UniProt_human	P12004	293	28750	7	7	3	3	0.55	Proliferating cell nuclear antigen OS=Homo sapiens GN=PCNA PE=1 SV=1
240	1	UniProt_human	Q96AG3	286	46145	12	12	6	6	0.73	Solute carrier family 25 member 46 OS=Homo sapiens GN=SLC25A46 PE=1 SV=1
241	1	UniProt_human	Q9BV20	283	39125	12	12	7	7	1.13	Methylthioribose-1-phosphate isomerase OS=Homo sapiens GN=MRI1 PE=1 SV=1
242	1	UniProt_human	P10644	282	42955	9	9	6	6	0.8	cAMP-dependent protein kinase type I-alpha regulatory subunit OS=Homo sapiens GN=PRKAR1A PE=1 SV=1
243	1	UniProt_human	O14773	280	61210	10	10	4	4	0.32	Tripeptidyl-peptidase 1 OS=Homo sapiens GN=TPP1 PE=1 SV=2
244	1	UniProt_human	H3BMF4	279	61067	11	11	5	5	0.41	Protein spinster homolog 1 OS=Homo sapiens GN=SPNS1 PE=1 SV=1
245	1	UniProt_human	P28482	274	41363	16	16	9	9	1.5	Mitogen-activated protein kinase 1 OS=Homo sapiens GN=MAPK1 PE=1 SV=3
246	1	UniProt_human	B4DR61	273	52915	13	13	7	7	0.75	Protein transport protein Sec61 subunit alpha isoform 1 OS=Homo sapiens GN=SEC61A1 PE=1 SV=1
247	1	UniProt_human	Q92890	272	34478	8	8	6	6	1.08	Ubiquitin fusion degradation protein 1 homolog OS=Homo sapiens GN=UFD1L PE=1 SV=3
248	1	UniProt_human	Q9HC07	271	34883	8	8	2	2	0.27	Transmembrane protein 165 OS=Homo sapiens GN=TMEM165 PE=1 SV=1
249	1	UniProt_human	Q9P0J7	270	41919	4	4	3	3	0.35	E3 ubiquitin-protein ligase KCMF1 OS=Homo sapiens GN=KCMF1 PE=1 SV=2
250	1	UniProt_human	Q68CQ7	270	41909	8	8	5	5	0.65	Glycosyltransferase 8 domain-containing protein 1 OS=Homo sapiens GN=GLT8D1 PE=1 SV=2
251	1	UniProt_human	Q96CU9	269	53778	13	13	7	7	0.73	FAD-dependent oxidoreductase domain-containing protein 1 OS=Homo sapiens GN=FOXRED1 PE=1 SV=2
4	11	UniProt_human	P12035	267	64378	15	15	8	8	0.69	Keratin, type II cytoskeletal 3 OS=Homo sapiens GN=KRT3 PE=1 SV=3
252	1	UniProt_human	Q9H4B6	267	44606	13	13	7	7	0.94	Protein salvador homolog 1 OS=Homo sapiens GN=SAV1 PE=1 SV=2
253	1	UniProt_human	Q13363	265	47505	12	12	7	7	1.04	C-terminal-binding protein 1 OS=Homo sapiens GN=CTBP1 PE=1 SV=2
254	1	UniProt_human	P36957	264	48724	11	11	6	6	0.68	Dihydrolipoyllysine-residue succinyltransferase component of 2-oxoglutarate dehydrogenase complex, mitochondrial OS=Homo sapiens GN=DLST PE=1 SV=4
255	1	UniProt_human	J3QT28	263	31684	14	14	7	7	1.54	Mitotic checkpoint protein BUB3 (Fragment) OS=Homo sapiens GN=BUB3 PE=1 SV=1
256	1	UniProt_human	B4DHE8	263	34790	7	7	3	3	0.44	RNA-binding protein Musashi homolog 2 OS=Homo sapiens GN=MSI2 PE=1 SV=1
257	1	UniProt_human	Q15633	261	39015	12	12	6	6	0.91	RISC-loading complex subunit TARBP2 OS=Homo sapiens GN=TARBP2 PE=1 SV=3
258	1	UniProt_human	Q2TAY7	261	57507	13	13	6	6	0.55	WD40 repeat-containing protein SMU1 OS=Homo sapiens GN=SMU1 PE=1 SV=2
259	1	UniProt_human	Q5JWF2	261	110956	9	9	5	5	0.21	Guanine nucleotide-binding protein G(s) subunit alpha isoforms XLas OS=Homo sapiens GN=GNAS PE=1 SV=2
260	1	UniProt_human	Q02413	259	113676	5	5	4	4	0.16	Desmoglein-1 OS=Homo sapiens GN=DSG1 PE=1 SV=2
261	1	UniProt_human	Q9P287-2	256	36192	9	9	4	4	0.59	Isoform 2 of BRCA2 and CDKN1A-interacting protein OS=Homo sapiens GN=BCCIP
262	1	UniProt_human	P46734	256	39293	12	12	8	8	1.36	Dual specificity mitogen-activated protein kinase kinase 3 OS=Homo sapiens GN=MAP2K3 PE=1 SV=2
263	1	UniProt_human	P25685	255	38020	14	14	9	9	1.71	DnaJ homolog subfamily B member 1 OS=Homo sapiens GN=DNAJB1 PE=1 SV=4
264	1	UniProt_human	Q96GA7	252	34652	7	7	4	4	0.63	Serine dehydratase-like OS=Homo sapiens GN=SDSL PE=1 SV=1
265	1	UniProt_human	Q9NZL4	251	39449	14	14	5	5	0.71	Hsp70-binding protein 1 OS=Homo sapiens GN=HSPBP1 PE=1 SV=1
266	1	UniProt_human	P05198	250	36089	12	12	8	8	1.55	Eukaryotic translation initiation factor 2 subunit 1 OS=Homo sapiens GN=EIF2S1 PE=1 SV=3
267	1	UniProt_human	Q96DI7	249	39286	6	6	5	5	0.71	U5 small nuclear ribonucleoprotein 40 kDa protein OS=Homo sapiens GN=SNRNP40 PE=1 SV=1
268	1	UniProt_human	E7EPK1	249	50663	9	9	6	6	0.65	Septin-7 OS=Homo sapiens GN=SEPT7 PE=1 SV=2
269	1	UniProt_human	P50395	248	50631	8	8	6	6	0.65	Rab GDP dissociation inhibitor beta OS=Homo sapiens GN=GDI2 PE=1 SV=2
270	1	UniProt_human	F1DAL9	247	43870	9	9	6	6	0.78	COUP transcription factor 1 OS=Homo sapiens GN=NR2F1 PE=1 SV=1
271	1	UniProt_human	Q8NI60	244	71904	5	5	3	3	0.19	Atypical kinase ADCK3, mitochondrial OS=Homo sapiens GN=ADCK3 PE=1 SV=1
272	1	UniProt_human	P50213	242	39566	15	15	8	8	1.35	Isocitrate dehydrogenase [NAD] subunit alpha, mitochondrial OS=Homo sapiens GN=IDH3A PE=1 SV=1
273	1	UniProt_human	P18031	239	49935	7	7	5	5	0.53	Tyrosine-protein phosphatase non-receptor type 1 OS=Homo sapiens GN=PTPN1 PE=1 SV=1
274	1	UniProt_human	F5H282	238	36433	9	9	5	5	1	T-complex protein 1 subunit alpha OS=Homo sapiens GN=TCP1 PE=1 SV=1
127	3	UniProt_human	F8VTQ5	236	16526	6	6	3	3	1.13	Heterogeneous nuclear ribonucleoprotein A1 (Fragment) OS=Homo sapiens GN=HNRNPA1 PE=1 SV=1
275	1	UniProt_human	O95864	236	52226	13	13	6	6	0.62	Fatty acid desaturase 2 OS=Homo sapiens GN=FADS2 PE=1 SV=1
276	1	UniProt_human	Q9HCN4	235	41714	8	8	3	3	0.35	GPN-loop GTPase 1 OS=Homo sapiens GN=GPN1 PE=1 SV=1
277	1	UniProt_human	Q8NFH3	235	42124	6	6	3	3	0.49	Nucleoporin Nup43 OS=Homo sapiens GN=NUP43 PE=1 SV=1
278	1	UniProt_human	J3QRD1	234	44620	7	7	4	4	0.46	Fatty aldehyde dehydrogenase OS=Homo sapiens GN=ALDH3A2 PE=1 SV=1
279	1	UniProt_human	P06280	234	48735	8	8	4	4	0.41	Alpha-galactosidase A OS=Homo sapiens GN=GLA PE=1 SV=1
270	2	UniProt_human	P24468	233	45542	8	8	5	5	0.59	COUP transcription factor 2 OS=Homo sapiens GN=NR2F2 PE=1 SV=1
280	1	UniProt_human	Q15654	233	50255	9	9	4	4	0.4	Thyroid receptor-interacting protein 6 OS=Homo sapiens GN=TRIP6 PE=1 SV=3
281	1	UniProt_human	C9JYJ0	232	46516	10	10	6	6	0.72	DNA repair protein RAD51 homolog 2 OS=Homo sapiens GN=RAD51B PE=1 SV=1
282	1	UniProt_human	Q5JPI3	229	37517	10	10	6	6	0.96	Uncharacterized protein C3orf38 OS=Homo sapiens GN=C3orf38 PE=1 SV=1
245	2	UniProt_human	P27361	227	43108	13	13	6	6	0.99	Mitogen-activated protein kinase 3 OS=Homo sapiens GN=MAPK3 PE=1 SV=4
283	1	UniProt_human	Q9NPH2	227	61029	9	9	6	6	0.52	Inositol-3-phosphate synthase 1 OS=Homo sapiens GN=ISYNA1 PE=1 SV=1
284	1	UniProt_human	Q01085	224	41564	10	10	6	6	0.84	Nucleolysin TIAR OS=Homo sapiens GN=TIAL1 PE=1 SV=1
285	1	UniProt_human	H0YHA7	223	18962	4	4	2	2	0.55	60S ribosomal protein L18 (Fragment) OS=Homo sapiens GN=RPL18 PE=1 SV=1
286	1	UniProt_human	H7C155	223	59703	7	7	5	5	0.43	RAF proto-oncogene serine/threonine-protein kinase (Fragment) OS=Homo sapiens GN=RAF1 PE=1 SV=1
253	2	UniProt_human	P56545	221	48914	10	10	6	6	0.68	C-terminal-binding protein 2 OS=Homo sapiens GN=CTBP2 PE=1 SV=1
287	1	UniProt_human	Q9NXX6	221	44274	6	6	5	5	0.61	Non-structural maintenance of chromosomes element 4 homolog A OS=Homo sapiens GN=NSMCE4A PE=1 SV=2
288	1	UniProt_human	A0A0B4J2G4	220	86184	9	9	8	8	0.48	Leucine-rich repeat-containing protein 41 OS=Homo sapiens GN=LRRC41 PE=1 SV=1
289	1	UniProt_human	Q96MG8	219	40650	14	14	6	6	0.86	Protein-L-isoaspartate O-methyltransferase domain-containing protein 1 OS=Homo sapiens GN=PCMTD1 PE=1 SV=2
290	1	UniProt_human	Q9NUQ7	219	53227	5	5	4	4	0.37	Ufm1-specific protease 2 OS=Homo sapiens GN=UFSP2 PE=1 SV=3
291	1	UniProt_human	Q9UKZ1	218	55180	6	6	5	5	0.47	CCR4-NOT transcription complex subunit 11 OS=Homo sapiens GN=CNOT11 PE=1 SV=1
292	1	UniProt_human	Q9Y2U9	218	46069	11	11	6	6	0.73	Kelch domain-containing protein 2 OS=Homo sapiens GN=KLHDC2 PE=1 SV=1
293	1	UniProt_human	Q9NT62	215	35841	6	6	4	4	0.6	Ubiquitin-like-conjugating enzyme ATG3 OS=Homo sapiens GN=ATG3 PE=1 SV=1
200	2	UniProt_human	Q9NQ29	214	43701	14	14	8	8	1.16	Putative RNA-binding protein Luc7-like 1 OS=Homo sapiens GN=LUC7L PE=1 SV=1
294	1	UniProt_human	A0A087WY55	214	31082	9	9	5	5	0.97	Chromosome 6 open reading frame 55, isoform CRA_b OS=Homo sapiens GN=VTA1 PE=1 SV=1
295	1	UniProt_human	P52209	214	53106	6	6	5	5	0.49	6-phosphogluconate dehydrogenase, decarboxylating OS=Homo sapiens GN=PGD PE=1 SV=3
296	1	UniProt_human	Q13155	213	35326	7	7	4	4	0.61	Aminoacyl tRNA synthase complex-interacting multifunctional protein 2 OS=Homo sapiens GN=AIMP2 PE=1 SV=2
191	2	UniProt_human	E7ETZ4	212	46884	14	14	9	9	1.25	Basic leucine zipper and W2 domain-containing protein 2 (Fragment) OS=Homo sapiens GN=BZW2 PE=1 SV=1
297	1	UniProt_human	P82675	212	47976	6	6	4	4	0.42	28S ribosomal protein S5, mitochondrial OS=Homo sapiens GN=MRPS5 PE=1 SV=2
298	1	UniProt_human	P43490	211	55487	7	7	4	4	0.36	Nicotinamide phosphoribosyltransferase OS=Homo sapiens GN=NAMPT PE=1 SV=1
299	1	UniProt_human	Q5JVF3	211	46000	9	9	4	4	0.44	PCI domain-containing protein 2 OS=Homo sapiens GN=PCID2 PE=1 SV=2
300	1	UniProt_human	A0A0A0MQU0	211	46991	7	7	5	5	0.72	WD repeat-containing protein 18 (Fragment) OS=Homo sapiens GN=WDR18 PE=1 SV=1
301	1	UniProt_human	Q00587	210	40270	14	14	9	9	1.57	Cdc42 effector protein 1 OS=Homo sapiens GN=CDC42EP1 PE=1 SV=1
302	1	UniProt_human	Q96IJ6	210	46262	8	8	5	5	0.58	Mannose-1-phosphate guanyltransferase alpha OS=Homo sapiens GN=GMPPA PE=1 SV=1
303	1	UniProt_human	P32929	209	44479	7	7	6	6	0.77	Cystathionine gamma-lyase OS=Homo sapiens GN=CTH PE=1 SV=3
304	1	UniProt_human	Q86YD1	209	46839	5	5	3	3	0.31	Prostate tumor-overexpressed gene 1 protein OS=Homo sapiens GN=PTOV1 PE=1 SV=1
305	1	UniProt_human	Q8NBI6	208	43778	9	9	5	5	0.62	Xyloside xylosyltransferase 1 OS=Homo sapiens GN=XXYLT1 PE=1 SV=1
306	1	UniProt_human	Q7L5N7	205	60169	10	10	7	7	0.64	Lysophosphatidylcholine acyltransferase 2 OS=Homo sapiens GN=LPCAT2 PE=1 SV=1
307	1	UniProt_human	Q9ULX3	205	46646	6	6	3	3	0.31	RNA-binding protein NOB1 OS=Homo sapiens GN=NOB1 PE=1 SV=1
308	1	UniProt_human	Q9BRP4	204	42163	9	9	5	5	0.65	Proteasomal ATPase-associated factor 1 OS=Homo sapiens GN=PAAF1 PE=1 SV=2
309	1	UniProt_human	J3QS39	203	10463	7	7	2	2	1.19	Polyubiquitin-B (Fragment) OS=Homo sapiens GN=UBB PE=1 SV=1
310	1	UniProt_human	P00558	203	44586	7	7	6	6	0.76	Phosphoglycerate kinase 1 OS=Homo sapiens GN=PGK1 PE=1 SV=3
311	1	UniProt_human	P56962	199	33383	5	5	3	3	0.46	Syntaxin-17 OS=Homo sapiens GN=STX17 PE=1 SV=2
312	1	UniProt_human	Q15427	198	44357	3	3	2	2	0.21	Splicing factor 3B subunit 4 OS=Homo sapiens GN=SF3B4 PE=1 SV=1
313	1	UniProt_human	O94766	197	37099	6	6	5	5	0.77	Galactosylgalactosylxylosylprotein 3-beta-glucuronosyltransferase 3 OS=Homo sapiens GN=B3GAT3 PE=1 SV=2
314	1	UniProt_human	H3BTB7	196	56790	8	8	4	4	0.35	Probable glutamate--tRNA ligase, mitochondrial OS=Homo sapiens GN=EARS2 PE=1 SV=1
315	1	UniProt_human	P19338	194	76568	9	9	7	7	0.47	Nucleolin OS=Homo sapiens GN=NCL PE=1 SV=3
316	1	UniProt_human	Q9UJT0	194	52898	10	10	7	7	0.75	Tubulin epsilon chain OS=Homo sapiens GN=TUBE1 PE=2 SV=1
317	1	UniProt_human	Q9Y265	194	50196	5	5	3	3	0.29	RuvB-like 1 OS=Homo sapiens GN=RUVBL1 PE=1 SV=1
318	1	UniProt_human	Q8TB36	194	41320	6	6	4	4	0.5	Ganglioside-induced differentiation-associated protein 1 OS=Homo sapiens GN=GDAP1 PE=1 SV=3
319	1	UniProt_human	Q9NZ32	193	46277	6	6	5	5	0.58	Actin-related protein 10 OS=Homo sapiens GN=ACTR10 PE=1 SV=1
320	1	UniProt_human	P22102	193	107699	9	9	6	6	0.27	Trifunctional purine biosynthetic protein adenosine-3 OS=Homo sapiens GN=GART PE=1 SV=1
321	1	UniProt_human	I3L1E8	192	12353	2	2	1	1	0.4	Mitochondrial dicarboxylate carrier (Fragment) OS=Homo sapiens GN=SLC25A10 PE=3 SV=1
322	1	UniProt_human	Q10469	190	51517	5	5	3	3	0.28	Alpha-1,6-mannosyl-glycoprotein 2-beta-N-acetylglucosaminyltransferase OS=Homo sapiens GN=MGAT2 PE=1 SV=1
323	1	UniProt_human	P42696	189	48535	7	7	5	5	0.55	RNA-binding protein 34 OS=Homo sapiens GN=RBM34 PE=1 SV=2
324	1	UniProt_human	A6NJ78	188	46092	5	5	5	5	0.58	Probable methyltransferase-like protein 15 OS=Homo sapiens GN=METTL15 PE=1 SV=1
99	2	UniProt_human	O14965	187	45781	6	6	4	4	0.45	Aurora kinase A OS=Homo sapiens GN=AURKA PE=1 SV=2
325	1	UniProt_human	Q5T160	187	65464	10	10	8	8	0.68	Probable arginine--tRNA ligase, mitochondrial OS=Homo sapiens GN=RARS2 PE=1 SV=1
326	1	UniProt_human	A0A087WTZ5	187	26999	3	3	2	2	0.36	UBX domain-containing protein 1 OS=Homo sapiens GN=UBXN1 PE=1 SV=1
327	1	UniProt_human	O43913	187	50251	8	8	5	5	0.52	Origin recognition complex subunit 5 OS=Homo sapiens GN=ORC5 PE=1 SV=1
328	1	UniProt_human	D6RID8	186	28466	7	7	5	5	1.09	General transcription factor IIH subunit 2-like protein (Fragment) OS=Homo sapiens GN=GTF2H2C PE=1 SV=1
329	1	UniProt_human	C9JYS8	186	29490	7	7	4	4	0.77	Non-POU domain-containing octamer-binding protein (Fragment) OS=Homo sapiens GN=NONO PE=1 SV=8
330	1	UniProt_human	Q8TDB4	186	25374	4	4	1	1	0.18	Protein MGARP OS=Homo sapiens GN=MGARP PE=1 SV=1
331	1	UniProt_human	E9PC52	186	46909	4	4	3	3	0.31	Histone-binding protein RBBP7 OS=Homo sapiens GN=RBBP7 PE=1 SV=1
332	1	UniProt_human	Q14320	185	40216	6	6	3	3	0.37	Protein FAM50A OS=Homo sapiens GN=FAM50A PE=1 SV=2
333	1	UniProt_human	P53990	184	39725	6	6	5	5	0.7	IST1 homolog OS=Homo sapiens GN=IST1 PE=1 SV=1
334	1	UniProt_human	Q9Y5P6	183	39809	12	12	6	6	0.89	Mannose-1-phosphate guanyltransferase beta OS=Homo sapiens GN=GMPPB PE=1 SV=2
335	1	UniProt_human	P54709	182	31492	9	9	3	3	0.49	Sodium/potassium-transporting ATPase subunit beta-3 OS=Homo sapiens GN=ATP1B3 PE=1 SV=1
336	1	UniProt_human	Q96K12	180	59400	6	6	5	5	0.43	Fatty acyl-CoA reductase 2 OS=Homo sapiens GN=FAR2 PE=2 SV=1
337	1	UniProt_human	Q9NXR7	180	43524	8	8	5	5	0.79	BRCA1-A complex subunit BRE OS=Homo sapiens GN=BRE PE=1 SV=2
338	1	UniProt_human	P63151	180	51659	8	8	6	6	0.63	Serine/threonine-protein phosphatase 2A 55 kDa regulatory subunit B alpha isoform OS=Homo sapiens GN=PPP2R2A PE=1 SV=1
339	1	UniProt_human	Q7L3T8	179	53228	12	12	8	8	0.89	Probable proline--tRNA ligase, mitochondrial OS=Homo sapiens GN=PARS2 PE=1 SV=1
340	1	UniProt_human	Q9Y266	179	38219	9	9	6	6	0.94	Nuclear migration protein nudC OS=Homo sapiens GN=NUDC PE=1 SV=1
341	1	UniProt_human	Q6P6C2	179	44229	3	3	2	2	0.21	RNA demethylase ALKBH5 OS=Homo sapiens GN=ALKBH5 PE=1 SV=2
342	1	UniProt_human	Q13243	178	31245	9	9	5	5	0.96	Serine/arginine-rich splicing factor 5 OS=Homo sapiens GN=SRSF5 PE=1 SV=1
343	1	UniProt_human	Q9UNZ2	178	40548	6	6	5	5	0.68	NSFL1 cofactor p47 OS=Homo sapiens GN=NSFL1C PE=1 SV=2
344	1	UniProt_human	Q9BXI3	178	40995	5	5	5	5	0.67	Cytosolic 5'-nucleotidase 1A OS=Homo sapiens GN=NT5C1A PE=2 SV=1
345	1	UniProt_human	J3KN38	177	22334	5	5	2	2	0.45	Methylosome subunit pICln OS=Homo sapiens GN=CLNS1A PE=1 SV=1
81	2	UniProt_human	Q9BV35	176	52345	9	9	6	6	0.62	Calcium-binding mitochondrial carrier protein SCaMC-3 OS=Homo sapiens GN=SLC25A23 PE=1 SV=2
346	1	UniProt_human	P50336	176	50734	10	10	7	7	0.79	Protoporphyrinogen oxidase OS=Homo sapiens GN=PPOX PE=1 SV=1
347	1	UniProt_human	G3V353	175	19770	6	6	3	3	0.88	Methyltransferase-like protein 17, mitochondrial (Fragment) OS=Homo sapiens GN=METTL17 PE=1 SV=1
348	1	UniProt_human	H0Y2W2	173	64315	8	8	5	5	0.48	ATPase family AAA domain-containing protein 3A (Fragment) OS=Homo sapiens GN=ATAD3A PE=1 SV=1
349	1	UniProt_human	A6NG10	172	25790	10	10	4	4	1.26	WW domain-binding protein 2 OS=Homo sapiens GN=WBP2 PE=1 SV=2
350	1	UniProt_human	O96008	172	37869	11	11	4	4	0.56	Mitochondrial import receptor subunit TOM40 homolog OS=Homo sapiens GN=TOMM40 PE=1 SV=1
351	1	UniProt_human	Q9NUD5	172	43591	7	7	5	5	0.62	Zinc finger CCHC domain-containing protein 3 OS=Homo sapiens GN=ZCCHC3 PE=1 SV=1
352	1	UniProt_human	Q6P444	171	43357	4	4	3	3	0.34	Mitochondrial fission regulator 2 OS=Homo sapiens GN=MTFR2 PE=1 SV=2
353	1	UniProt_human	I3L4X3	171	25104	5	5	2	2	0.4	NF-kappa-B inhibitor beta (Fragment) OS=Homo sapiens GN=NFKBIB PE=1 SV=8
284	2	UniProt_human	F8W8I6	168	42808	6	6	5	5	0.64	Nucleolysin TIA-1 isoform p40 OS=Homo sapiens GN=TIA1 PE=1 SV=1
354	1	UniProt_human	Q8N1N4	168	56830	5	5	4	4	0.35	Keratin, type II cytoskeletal 78 OS=Homo sapiens GN=KRT78 PE=2 SV=2
355	1	UniProt_human	H0Y8L7	168	22123	2	2	1	1	0.21	40S ribosomal protein S3a (Fragment) OS=Homo sapiens GN=RPS3A PE=1 SV=1
356	1	UniProt_human	Q8NEZ5	167	44480	4	4	3	3	0.33	F-box only protein 22 OS=Homo sapiens GN=FBXO22 PE=1 SV=1
357	1	UniProt_human	Q9HAD4	166	51695	5	5	4	4	0.39	WD repeat-containing protein 41 OS=Homo sapiens GN=WDR41 PE=2 SV=3
358	1	UniProt_human	D6R938	165	56263	10	10	5	5	0.57	Calcium/calmodulin-dependent protein kinase (CaM kinase) II delta, isoform CRA_e OS=Homo sapiens GN=CAMK2D PE=1 SV=1
359	1	UniProt_human	O76071	165	37816	7	7	4	4	0.56	Probable cytosolic iron-sulfur protein assembly protein CIAO1 OS=Homo sapiens GN=CIAO1 PE=1 SV=1
360	1	UniProt_human	Q8IWF2	163	77743	5	5	4	4	0.24	FAD-dependent oxidoreductase domain-containing protein 2 OS=Homo sapiens GN=FOXRED2 PE=1 SV=1
361	1	UniProt_human	Q9P035	163	43132	3	3	2	2	0.22	Very-long-chain (3R)-3-hydroxyacyl-CoA dehydratase 3 OS=Homo sapiens GN=HACD3 PE=1 SV=2
362	1	UniProt_human	P38646	161	73635	5	5	4	4	0.26	Stress-70 protein, mitochondrial OS=Homo sapiens GN=HSPA9 PE=1 SV=2
363	1	UniProt_human	M0R001	161	22457	3	3	1	1	0.21	Protein COQ8B (Fragment) OS=Homo sapiens GN=COQ8B PE=1 SV=1
364	1	UniProt_human	Q9BWD1	161	41324	7	7	3	3	0.36	Acetyl-CoA acetyltransferase, cytosolic OS=Homo sapiens GN=ACAT2 PE=1 SV=2
365	1	UniProt_human	O75955	161	47326	6	6	4	4	0.43	Flotillin-1 OS=Homo sapiens GN=FLOT1 PE=1 SV=3
366	1	UniProt_human	Q9HC36	161	46990	6	6	5	5	0.57	rRNA methyltransferase 3, mitochondrial OS=Homo sapiens GN=MRM3 PE=1 SV=2
367	1	UniProt_human	A0A0A0MTH3	160	54577	10	10	5	5	0.47	Integrin-linked protein kinase OS=Homo sapiens GN=ILK PE=1 SV=1
368	1	UniProt_human	Q5T8U3	160	21531	10	10	5	5	1.64	60S ribosomal protein L7a (Fragment) OS=Homo sapiens GN=RPL7A PE=1 SV=1
369	1	UniProt_human	P42765	160	41898	8	8	7	7	1.03	3-ketoacyl-CoA thiolase, mitochondrial OS=Homo sapiens GN=ACAA2 PE=1 SV=2
370	1	UniProt_human	Q5T9L3	159	62212	6	6	4	4	0.31	Protein wntless homolog OS=Homo sapiens GN=WLS PE=1 SV=2
371	1	UniProt_human	Q9UKT7	159	48676	7	7	4	4	0.41	F-box/LRR-repeat protein 3 OS=Homo sapiens GN=FBXL3 PE=1 SV=1
107	2	UniProt_human	P19784	158	41187	7	7	6	6	0.85	Casein kinase II subunit alpha' OS=Homo sapiens GN=CSNK2A2 PE=1 SV=1
372	1	UniProt_human	P61201	158	51564	11	11	9	9	1.09	COP9 signalosome complex subunit 2 OS=Homo sapiens GN=COPS2 PE=1 SV=1
373	1	UniProt_human	P33981	158	97011	5	5	4	4	0.19	Dual specificity protein kinase TTK OS=Homo sapiens GN=TTK PE=1 SV=2
374	1	UniProt_human	Q6P4I2	157	41659	4	4	3	3	0.36	WD repeat-containing protein 73 OS=Homo sapiens GN=WDR73 PE=1 SV=1
375	1	UniProt_human	Q9BRK5	156	41780	9	9	5	5	0.66	45 kDa calcium-binding protein OS=Homo sapiens GN=SDF4 PE=1 SV=1
376	1	UniProt_human	P15924	156	331569	8	8	8	8	0.11	Desmoplakin OS=Homo sapiens GN=DSP PE=1 SV=3
377	1	UniProt_human	C9JP16	156	41406	9	9	6	6	0.84	Cartilage-associated protein OS=Homo sapiens GN=CRTAP PE=1 SV=1
378	1	UniProt_human	Q8NCH0	156	42969	6	6	5	5	0.63	Carbohydrate sulfotransferase 14 OS=Homo sapiens GN=CHST14 PE=1 SV=2
379	1	UniProt_human	A0A087WU02	155	43405	6	6	5	5	0.63	Endoplasmic reticulum-Golgi intermediate compartment protein 2 OS=Homo sapiens GN=ERGIC2 PE=1 SV=1
380	1	UniProt_human	G5E9D4	154	58795	3	3	2	2	0.15	Elongation protein 4 homolog (S. cerevisiae), isoform CRA_b OS=Homo sapiens GN=ELP4 PE=1 SV=1
259	2	UniProt_human	Q14344	153	44022	5	5	2	2	0.21	Guanine nucleotide-binding protein subunit alpha-13 OS=Homo sapiens GN=GNA13 PE=1 SV=2
381	1	UniProt_human	Q9HD45	153	67843	10	10	7	7	0.75	Transmembrane 9 superfamily member 3 OS=Homo sapiens GN=TM9SF3 PE=1 SV=2
382	1	UniProt_human	P07900	153	84607	5	5	5	5	0.28	Heat shock protein HSP 90-alpha OS=Homo sapiens GN=HSP90AA1 PE=1 SV=5
383	1	UniProt_human	Q9UQ80	153	43759	9	9	6	6	0.78	Proliferation-associated protein 2G4 OS=Homo sapiens GN=PA2G4 PE=1 SV=3
246	2	UniProt_human	F8W776	152	44720	5	5	4	4	0.46	Protein transport protein Sec61 subunit alpha isoform 2 OS=Homo sapiens GN=SEC61A2 PE=1 SV=1
384	1	UniProt_human	Q6X734	152	28383	3	3	2	2	0.34	NIF3-like protein 1 OS=Homo sapiens GN=NIF3L1 PE=1 SV=1
385	1	UniProt_human	Q92604	152	43061	4	4	3	3	0.34	Acyl-CoA:lysophosphatidylglycerol acyltransferase 1 OS=Homo sapiens GN=LPGAT1 PE=1 SV=1
386	1	UniProt_human	P82933	152	45806	9	9	5	5	0.58	28S ribosomal protein S9, mitochondrial OS=Homo sapiens GN=MRPS9 PE=1 SV=2
387	1	UniProt_human	M0QWZ7	152	58146	5	5	5	5	0.44	Serine--tRNA ligase, mitochondrial OS=Homo sapiens GN=SARS2 PE=1 SV=1
388	1	UniProt_human	H0YCR7	152	30430	2	2	1	1	0.15	Ribonuclease inhibitor (Fragment) OS=Homo sapiens GN=RNH1 PE=1 SV=1
389	1	UniProt_human	Q7Z2W4	152	101367	3	3	2	2	0.09	Zinc finger CCCH-type antiviral protein 1 OS=Homo sapiens GN=ZC3HAV1 PE=1 SV=3
390	1	UniProt_human	B4DP61	151	24365	4	4	2	2	0.41	Survival motor neuron protein OS=Homo sapiens GN=SMN2 PE=1 SV=1
391	1	UniProt_human	Q9NXR1	150	38785	5	5	5	5	0.72	Nuclear distribution protein nudE homolog 1 OS=Homo sapiens GN=NDE1 PE=1 SV=2
392	1	UniProt_human	Q7LC14	149	38495	5	5	4	4	0.55	NF-kappa-B inhibitor epsilon OS=Homo sapiens GN=NFKBIE PE=1 SV=1
393	1	UniProt_human	P00966	149	46501	7	7	6	6	0.72	Argininosuccinate synthase OS=Homo sapiens GN=ASS1 PE=1 SV=2
394	1	UniProt_human	Q9UL15	148	51168	5	5	4	4	0.39	BAG family molecular chaperone regulator 5 OS=Homo sapiens GN=BAG5 PE=1 SV=1
395	1	UniProt_human	K7EN15	148	29448	4	4	2	2	0.33	Soluble calcium-activated nucleotidase 1 OS=Homo sapiens GN=CANT1 PE=1 SV=1
396	1	UniProt_human	P52292	148	57826	5	5	3	3	0.25	Importin subunit alpha-1 OS=Homo sapiens GN=KPNA2 PE=1 SV=1
397	1	UniProt_human	B4DJV2	147	50400	8	8	4	4	0.4	Citrate synthase OS=Homo sapiens GN=CS PE=1 SV=1
398	1	UniProt_human	M0QXB4	147	36901	2	2	1	1	0.12	Coatomer protein complex, subunit epsilon, isoform CRA_g OS=Homo sapiens GN=COPE PE=1 SV=1
399	1	UniProt_human	P46977	147	80477	8	8	4	4	0.23	Dolichyl-diphosphooligosaccharide--protein glycosyltransferase subunit STT3A OS=Homo sapiens GN=STT3A PE=1 SV=2
400	1	UniProt_human	Q13283	147	52132	3	3	1	1	0.18	Ras GTPase-activating protein-binding protein 1 OS=Homo sapiens GN=G3BP1 PE=1 SV=1
401	1	UniProt_human	P0CAP2	147	41714	4	4	4	4	0.5	DNA-directed RNA polymerase II subunit GRINL1A OS=Homo sapiens GN=POLR2M PE=1 SV=1
402	1	UniProt_human	Q9NP92	147	50333	5	5	3	3	0.29	28S ribosomal protein S30, mitochondrial OS=Homo sapiens GN=MRPS30 PE=1 SV=2
403	1	UniProt_human	A0A087WY71	146	49495	12	12	9	9	1.16	AP-2 complex subunit mu OS=Homo sapiens GN=AP2M1 PE=1 SV=1
404	1	UniProt_human	Q8N4Q0	146	40115	5	5	4	4	0.52	Zinc-binding alcohol dehydrogenase domain-containing protein 2 OS=Homo sapiens GN=ZADH2 PE=1 SV=1
405	1	UniProt_human	Q96DV4	146	44568	9	9	4	4	0.46	39S ribosomal protein L38, mitochondrial OS=Homo sapiens GN=MRPL38 PE=1 SV=2
406	1	UniProt_human	E7EPB3	145	14549	2	2	1	1	0.33	60S ribosomal protein L14 OS=Homo sapiens GN=RPL14 PE=1 SV=1
407	1	UniProt_human	Q9ULR0	145	32972	6	6	3	3	0.47	Pre-mRNA-splicing factor ISY1 homolog OS=Homo sapiens GN=ISY1 PE=1 SV=3
408	1	UniProt_human	Q9C0F1	144	44111	3	3	3	3	0.33	Centrosomal protein of 44 kDa OS=Homo sapiens GN=CEP44 PE=1 SV=2
409	1	UniProt_human	K7EK33	143	43228	2	2	2	2	0.22	DAZ-associated protein 1 OS=Homo sapiens GN=DAZAP1 PE=1 SV=2
410	1	UniProt_human	Q9H857	143	60680	6	6	4	4	0.32	5'-nucleotidase domain-containing protein 2 OS=Homo sapiens GN=NT5DC2 PE=1 SV=1
391	2	UniProt_human	A6NIZ0	142	30620	3	3	3	3	0.51	Nuclear distribution protein nudE-like 1 OS=Homo sapiens GN=NDEL1 PE=1 SV=4
39	3	UniProt_human	P25686	141	35558	5	5	3	3	0.43	DnaJ homolog subfamily B member 2 OS=Homo sapiens GN=DNAJB2 PE=1 SV=3
411	1	UniProt_human	A0A0U1RR32	141	18470	2	2	1	1	0.25	Histone H2A OS=Homo sapiens GN=hCG_2039566 PE=3 SV=1
412	1	UniProt_human	O00330	141	54089	10	10	7	7	0.73	Pyruvate dehydrogenase protein X component, mitochondrial OS=Homo sapiens GN=PDHX PE=1 SV=3
413	1	UniProt_human	A0A0U1RQH7	140	26682	3	3	3	3	0.6	RNA-binding protein 39 (Fragment) OS=Homo sapiens GN=RBM39 PE=1 SV=1
414	1	UniProt_human	E9PIF4	139	28982	6	6	3	3	0.54	Sialidase-1 OS=Homo sapiens GN=NEU1 PE=1 SV=1
415	1	UniProt_human	D3YTB5	139	76012	5	5	4	4	0.25	Interleukin-1 receptor-associated kinase 1 OS=Homo sapiens GN=IRAK1 PE=1 SV=1
416	1	UniProt_human	Q96J01	139	38747	4	4	3	3	0.39	THO complex subunit 3 OS=Homo sapiens GN=THOC3 PE=1 SV=1
417	1	UniProt_human	Q9NRD5	138	46571	2	2	2	2	0.2	PRKCA-binding protein OS=Homo sapiens GN=PICK1 PE=1 SV=2
418	1	UniProt_human	Q9UKY7	138	27318	6	6	4	4	0.85	Protein CDV3 homolog OS=Homo sapiens GN=CDV3 PE=1 SV=1
419	1	UniProt_human	Q9NVH6	137	49486	6	6	3	3	0.29	Trimethyllysine dioxygenase, mitochondrial OS=Homo sapiens GN=TMLHE PE=1 SV=1
382	2	UniProt_human	P08238	136	83212	6	6	5	5	0.29	Heat shock protein HSP 90-beta OS=Homo sapiens GN=HSP90AB1 PE=1 SV=4
420	1	UniProt_human	P34896	136	53049	8	8	8	8	0.89	Serine hydroxymethyltransferase, cytosolic OS=Homo sapiens GN=SHMT1 PE=1 SV=1
421	1	UniProt_human	Q86Y07	136	58104	5	5	4	4	0.34	Serine/threonine-protein kinase VRK2 OS=Homo sapiens GN=VRK2 PE=1 SV=3
230	2	UniProt_human	P50750	134	42750	9	9	6	6	0.81	Cyclin-dependent kinase 9 OS=Homo sapiens GN=CDK9 PE=1 SV=3
422	1	UniProt_human	Q9NR12	134	49813	10	10	6	6	0.66	PDZ and LIM domain protein 7 OS=Homo sapiens GN=PDLIM7 PE=1 SV=1
423	1	UniProt_human	P29992	134	42097	3	3	2	2	0.22	Guanine nucleotide-binding protein subunit alpha-11 OS=Homo sapiens GN=GNA11 PE=1 SV=2
424	1	UniProt_human	Q96CS3	134	52591	5	5	4	4	0.38	FAS-associated factor 2 OS=Homo sapiens GN=FAF2 PE=1 SV=2
425	1	UniProt_human	P85299	133	42727	2	2	2	2	0.22	Proline-rich protein 5 OS=Homo sapiens GN=PRR5 PE=1 SV=1
426	1	UniProt_human	G3V0I5	133	50022	8	8	4	4	0.4	NADH dehydrogenase (Ubiquinone) flavoprotein 1, 51kDa, isoform CRA_c OS=Homo sapiens GN=NDUFV1 PE=1 SV=1
427	1	UniProt_human	E7ENJ6	132	42609	10	10	6	6	0.81	AP-1 complex subunit mu-1 OS=Homo sapiens GN=AP1M1 PE=1 SV=1
428	1	UniProt_human	J3QQJ0	132	35862	3	3	3	3	0.42	SAP30-binding protein (Fragment) OS=Homo sapiens GN=SAP30BP PE=1 SV=1
429	1	UniProt_human	F8VVM2	132	36138	3	3	2	2	0.42	Phosphate carrier protein, mitochondrial OS=Homo sapiens GN=SLC25A3 PE=1 SV=1
430	1	UniProt_human	H7C3P9	131	39011	6	6	2	2	0.24	COP9 signalosome complex subunit 3 OS=Homo sapiens GN=COPS3 PE=1 SV=2
431	1	UniProt_human	Q96DZ1	131	54823	2	2	1	1	0.08	Endoplasmic reticulum lectin 1 OS=Homo sapiens GN=ERLEC1 PE=1 SV=1
432	1	UniProt_human	Q96MX6	130	39715	4	4	3	3	0.37	WD repeat-containing protein 92 OS=Homo sapiens GN=WDR92 PE=1 SV=1
433	1	UniProt_human	Q9Y2P8	129	40817	6	6	5	5	0.86	RNA 3'-terminal phosphate cyclase-like protein OS=Homo sapiens GN=RCL1 PE=1 SV=3
434	1	UniProt_human	D6RGJ8	129	15177	3	3	1	1	0.31	WD repeat-containing protein 55 OS=Homo sapiens GN=WDR55 PE=1 SV=1
435	1	UniProt_human	P62995	128	33646	3	3	2	2	0.28	Transformer-2 protein homolog beta OS=Homo sapiens GN=TRA2B PE=1 SV=1
436	1	UniProt_human	A0A0A0MSZ9	128	38424	4	4	3	3	0.39	Cleavage stimulation factor subunit 1 (Fragment) OS=Homo sapiens GN=CSTF1 PE=1 SV=1
437	1	UniProt_human	Q5VUD6	128	48551	4	4	3	3	0.3	Protein FAM69B OS=Homo sapiens GN=FAM69B PE=1 SV=3
438	1	UniProt_human	J3KNN3	127	46857	6	6	5	5	0.57	Phosphorylase b kinase gamma catalytic chain, liver/testis isoform OS=Homo sapiens GN=PHKG2 PE=1 SV=1
439	1	UniProt_human	B7ZAX5	127	47604	5	5	4	4	0.43	N-acetylgalactosamine kinase OS=Homo sapiens GN=GALK2 PE=1 SV=1
331	2	UniProt_human	Q09028	126	47626	2	2	2	2	0.19	Histone-binding protein RBBP4 OS=Homo sapiens GN=RBBP4 PE=1 SV=3
440	1	UniProt_human	H7BZK6	125	39474	3	3	2	2	0.24	Ubiquitin carboxyl-terminal hydrolase 46 OS=Homo sapiens GN=USP46 PE=1 SV=1
441	1	UniProt_human	Q9NWT1	125	43936	2	2	2	2	0.21	p21-activated protein kinase-interacting protein 1 OS=Homo sapiens GN=PAK1IP1 PE=1 SV=2
442	1	UniProt_human	Q96PU8	125	37647	5	5	4	4	0.57	Protein quaking OS=Homo sapiens GN=QKI PE=1 SV=1
443	1	UniProt_human	Q9NX07	125	32477	4	4	3	3	0.47	tRNA selenocysteine 1-associated protein 1 OS=Homo sapiens GN=TRNAU1AP PE=1 SV=1
444	1	UniProt_human	H0YHS6	124	32165	3	3	3	3	0.48	Tyrosine--tRNA ligase (Fragment) OS=Homo sapiens GN=YARS2 PE=1 SV=1
445	1	UniProt_human	Q969Y2-4	124	54406	4	4	4	4	0.36	Isoform 4 of tRNA modification GTPase GTPBP3, mitochondrial OS=Homo sapiens GN=GTPBP3
446	1	UniProt_human	F5H793	123	10800	2	2	2	2	1.14	L-lactate dehydrogenase B chain (Fragment) OS=Homo sapiens GN=LDHB PE=1 SV=1
447	1	UniProt_human	Q14739	123	70658	3	3	3	3	0.2	Lamin-B receptor OS=Homo sapiens GN=LBR PE=1 SV=2
448	1	UniProt_human	G5E972	123	46278	2	2	2	2	0.2	Lamina-associated polypeptide 2, isoforms beta/gamma OS=Homo sapiens GN=TMPO PE=1 SV=1
449	1	UniProt_human	P11172	121	52189	5	5	4	4	0.38	Uridine 5'-monophosphate synthase OS=Homo sapiens GN=UMPS PE=1 SV=1
450	1	UniProt_human	H0Y2Y8	121	57606	3	3	3	3	0.25	Zyxin (Fragment) OS=Homo sapiens GN=ZYX PE=1 SV=1
451	1	UniProt_human	Q9UBU6	120	44095	4	4	3	3	0.33	Protein FAM8A1 OS=Homo sapiens GN=FAM8A1 PE=1 SV=1
452	1	UniProt_human	Q9BQ95	120	49117	4	4	3	3	0.29	Evolutionarily conserved signaling intermediate in Toll pathway, mitochondrial OS=Homo sapiens GN=ECSIT PE=1 SV=1
453	1	UniProt_human	Q96S06	120	64831	4	4	3	3	0.22	Lipase maturation factor 1 OS=Homo sapiens GN=LMF1 PE=1 SV=1
454	1	UniProt_human	O95218	120	37382	6	6	5	5	0.76	Zinc finger Ran-binding domain-containing protein 2 OS=Homo sapiens GN=ZRANB2 PE=1 SV=2
455	1	UniProt_human	E7ESC7	120	49361	7	7	6	6	0.67	Macrophage erythroblast attacher OS=Homo sapiens GN=MAEA PE=1 SV=1
456	1	UniProt_human	G3V126	120	51537	4	4	3	3	0.28	ATPase, H+ transporting, lysosomal 50/57kDa, V1 subunit H, isoform CRA_c OS=Homo sapiens GN=ATP6V1H PE=1 SV=1
457	1	UniProt_human	F8W726	119	113559	4	4	3	3	0.12	Ubiquitin-associated protein 2-like OS=Homo sapiens GN=UBAP2L PE=1 SV=2
458	1	UniProt_human	Q8WVM0	119	39518	5	5	4	4	0.53	Dimethyladenosine transferase 1, mitochondrial OS=Homo sapiens GN=TFB1M PE=1 SV=1
459	1	UniProt_human	A0A0D9SFG6	119	46531	4	4	2	2	0.2	Cytohesin-2 OS=Homo sapiens GN=CYTH2 PE=1 SV=1
460	1	UniProt_human	J3KPT4	119	42665	3	3	3	3	0.35	TraB domain-containing protein OS=Homo sapiens GN=TRABD PE=1 SV=1
461	1	UniProt_human	E9PJC4	118	24247	3	3	2	2	0.41	Transmembrane 9 superfamily member (Fragment) OS=Homo sapiens GN=TM9SF1 PE=3 SV=1
462	1	UniProt_human	G5E975	117	45022	3	3	2	2	0.21	SWI/SNF related, matrix associated, actin dependent regulator of chromatin, subfamily b, member 1, isoform CRA_c OS=Homo sapiens GN=SMARCB1 PE=1 SV=1
463	1	UniProt_human	Q6UX07	117	40823	5	5	4	4	0.51	Dehydrogenase/reductase SDR family member 13 OS=Homo sapiens GN=DHRS13 PE=2 SV=1
464	1	UniProt_human	Q9NWS0	116	32342	3	3	2	2	0.3	PIH1 domain-containing protein 1 OS=Homo sapiens GN=PIH1D1 PE=1 SV=1
465	1	UniProt_human	P39748	116	42566	4	4	2	2	0.22	Flap endonuclease 1 OS=Homo sapiens GN=FEN1 PE=1 SV=1
466	1	UniProt_human	Q9NZC7	116	46647	2	2	2	2	0.2	WW domain-containing oxidoreductase OS=Homo sapiens GN=WWOX PE=1 SV=1
467	1	UniProt_human	P19838	116	105290	4	4	3	3	0.13	Nuclear factor NF-kappa-B p105 subunit OS=Homo sapiens GN=NFKB1 PE=1 SV=2
468	1	UniProt_human	B5MCZ9	115	32087	3	3	1	1	0.14	Glutaminyl-peptide cyclotransferase (Fragment) OS=Homo sapiens GN=QPCT PE=1 SV=1
469	1	UniProt_human	A0A0B4J1Z1	115	15753	4	4	2	2	0.69	Serine/arginine-rich-splicing factor 7 OS=Homo sapiens GN=SRSF7 PE=1 SV=1
470	1	UniProt_human	U3KQF8	114	7952	4	4	1	1	0.66	Serine/threonine-protein kinase 17B (Fragment) OS=Homo sapiens GN=STK17B PE=1 SV=1
471	1	UniProt_human	Q8NFW8	114	48349	3	3	2	2	0.19	N-acylneuraminate cytidylyltransferase OS=Homo sapiens GN=CMAS PE=1 SV=2
472	1	UniProt_human	H0YHC3	113	23403	4	4	3	3	0.71	Nucleosome assembly protein 1-like 1 (Fragment) OS=Homo sapiens GN=NAP1L1 PE=1 SV=1
473	1	UniProt_human	Q15599	113	37391	3	3	3	3	0.4	Na(+)/H(+) exchange regulatory cofactor NHE-RF2 OS=Homo sapiens GN=SLC9A3R2 PE=1 SV=2
474	1	UniProt_human	Q8IVS2	113	42934	3	3	2	2	0.22	Malonyl-CoA-acyl carrier protein transacylase, mitochondrial OS=Homo sapiens GN=MCAT PE=1 SV=2
475	1	UniProt_human	F6TDL0	112	59357	4	4	3	3	0.24	Phosphatidylinositol 3-kinase regulatory subunit gamma OS=Homo sapiens GN=PIK3R3 PE=1 SV=1
476	1	UniProt_human	I3L4J1	111	48041	6	6	5	5	0.55	Uncharacterized protein (Fragment) OS=Homo sapiens PE=1 SV=3
477	1	UniProt_human	P21953	111	43095	2	2	2	2	0.22	2-oxoisovalerate dehydrogenase subunit beta, mitochondrial OS=Homo sapiens GN=BCKDHB PE=1 SV=2
478	1	UniProt_human	F8WJN3	110	52238	3	3	3	3	0.27	Cleavage and polyadenylation-specificity factor subunit 6 OS=Homo sapiens GN=CPSF6 PE=1 SV=1
479	1	UniProt_human	Q9UHI6	110	92182	4	4	3	3	0.15	Probable ATP-dependent RNA helicase DDX20 OS=Homo sapiens GN=DDX20 PE=1 SV=2
480	1	UniProt_human	O75063	110	46403	5	5	4	4	0.44	Glycosaminoglycan xylosylkinase OS=Homo sapiens GN=FAM20B PE=1 SV=1
481	1	UniProt_human	F5H047	110	31486	6	6	4	4	0.71	Cleavage and polyadenylation-specificity factor subunit 7 (Fragment) OS=Homo sapiens GN=CPSF7 PE=1 SV=1
199	2	UniProt_human	A0A087WUK2	109	40016	7	7	5	5	0.69	Heterogeneous nuclear ribonucleoprotein D-like OS=Homo sapiens GN=HNRNPDL PE=1 SV=1
425	2	UniProt_human	B1AHC3	109	64453	2	2	2	2	0.14	Protein PRR5-ARHGAP8 OS=Homo sapiens GN=PRR5-ARHGAP8 PE=4 SV=1
482	1	UniProt_human	A0A087X2B1	109	40285	2	2	2	2	0.23	RNA binding protein fox-1 homolog OS=Homo sapiens GN=RBFOX1 PE=4 SV=1
483	1	UniProt_human	J3KRD0	109	28420	3	3	3	3	0.56	Archaemetzincin-2 (Fragment) OS=Homo sapiens GN=AMZ2 PE=1 SV=1
484	1	UniProt_human	X6R6D0	109	38602	5	5	4	4	0.55	SHC-transforming protein 1 OS=Homo sapiens GN=SHC1 PE=1 SV=1
485	1	UniProt_human	A0A087WVC4	108	39211	5	5	3	3	0.38	cAMP-dependent protein kinase catalytic subunit beta OS=Homo sapiens GN=PRKACB PE=1 SV=1
487	1	UniProt_human	A0A0C4DFV9	108	31105	4	4	4	4	0.72	Protein SET OS=Homo sapiens GN=SET PE=1 SV=1
488	1	UniProt_human	Q07820	107	37314	5	5	3	3	0.4	Induced myeloid leukemia cell differentiation protein Mcl-1 OS=Homo sapiens GN=MCL1 PE=1 SV=3
342	2	UniProt_human	Q13247	106	39563	6	6	4	4	0.53	Serine/arginine-rich splicing factor 6 OS=Homo sapiens GN=SRSF6 PE=1 SV=2
486	1	UniProt_human	B4DNK4	106	49866	2	2	2	2	0.18	Pyruvate kinase OS=Homo sapiens GN=PKM PE=1 SV=1
489	1	UniProt_human	M0QYV0	106	19262	2	2	1	1	0.24	Uncharacterized protein (Fragment) OS=Homo sapiens PE=3 SV=1
490	1	UniProt_human	E9PL17	106	48909	8	8	4	4	0.41	Polyribonucleotide 5'-hydroxyl-kinase Clp1 OS=Homo sapiens GN=CLP1 PE=1 SV=1
491	1	UniProt_human	F5H1S9	106	41703	4	4	3	3	0.35	tRNA pseudouridine synthase OS=Homo sapiens GN=PUS1 PE=1 SV=1
492	1	UniProt_human	Q9NR50	106	50208	8	8	5	5	0.52	Translation initiation factor eIF-2B subunit gamma OS=Homo sapiens GN=EIF2B3 PE=1 SV=1
493	1	UniProt_human	P28330	106	47625	2	2	2	2	0.19	Long-chain specific acyl-CoA dehydrogenase, mitochondrial OS=Homo sapiens GN=ACADL PE=1 SV=2
494	1	UniProt_human	O95801	106	44650	4	4	2	2	0.21	Tetratricopeptide repeat protein 4 OS=Homo sapiens GN=TTC4 PE=1 SV=3
495	1	UniProt_human	Q52LJ0	105	37167	6	6	5	5	0.76	Protein FAM98B OS=Homo sapiens GN=FAM98B PE=1 SV=1
496	1	UniProt_human	Q9UHY8	105	39642	6	6	5	5	0.7	Fasciculation and elongation protein zeta-2 OS=Homo sapiens GN=FEZ2 PE=1 SV=2
497	1	UniProt_human	Q9NW64	105	46865	2	2	2	2	0.2	Pre-mRNA-splicing factor RBM22 OS=Homo sapiens GN=RBM22 PE=1 SV=1
498	1	UniProt_human	Q32MN6	105	31596	3	3	2	2	0.3	TATA-box-binding protein OS=Homo sapiens GN=TBP PE=1 SV=1
499	1	UniProt_human	P40939	104	82947	3	3	3	3	0.17	Trifunctional enzyme subunit alpha, mitochondrial OS=Homo sapiens GN=HADHA PE=1 SV=2
500	1	UniProt_human	F5H442	103	40892	4	4	4	4	0.51	Tumor susceptibility gene 101 protein OS=Homo sapiens GN=TSG101 PE=1 SV=1
501	1	UniProt_human	E9PL41	103	22721	2	2	1	1	0.2	Hypoxia-inducible factor 1-alpha inhibitor (Fragment) OS=Homo sapiens GN=HIF1AN PE=1 SV=2
502	1	UniProt_human	P46109	103	33756	4	4	4	4	0.65	Crk-like protein OS=Homo sapiens GN=CRKL PE=1 SV=1
503	1	UniProt_human	A4D1E9	103	42906	4	4	3	3	0.34	GTP-binding protein 10 OS=Homo sapiens GN=GTPBP10 PE=1 SV=1
485	2	UniProt_human	P17612	102	40564	5	5	3	3	0.37	cAMP-dependent protein kinase catalytic subunit alpha OS=Homo sapiens GN=PRKACA PE=1 SV=2
504	1	UniProt_human	P05388	102	34252	4	4	4	4	0.63	60S acidic ribosomal protein P0 OS=Homo sapiens GN=RPLP0 PE=1 SV=1
505	1	UniProt_human	Q53EU6	101	48673	3	3	2	2	0.19	Glycerol-3-phosphate acyltransferase 3 OS=Homo sapiens GN=GPAT3 PE=1 SV=2
506	1	UniProt_human	O14828	100	38262	1	1	1	1	0.12	Secretory carrier-associated membrane protein 3 OS=Homo sapiens GN=SCAMP3 PE=1 SV=3
507	1	UniProt_human	P50991	99	57888	4	4	3	3	0.24	T-complex protein 1 subunit delta OS=Homo sapiens GN=CCT4 PE=1 SV=4
508	1	UniProt_human	S4R2X2	98	19905	1	1	1	1	0.23	Sideroflexin-1 OS=Homo sapiens GN=SFXN1 PE=1 SV=1
509	1	UniProt_human	B4DXW1	98	41977	5	5	4	4	0.5	Actin-related protein 3 OS=Homo sapiens GN=ACTR3 PE=1 SV=1
510	1	UniProt_human	B5MC31	98	39773	5	5	3	3	0.37	E3 ubiquitin-protein ligase FANCL OS=Homo sapiens GN=FANCL PE=1 SV=1
511	1	UniProt_human	A0A087X211	98	102218	3	3	3	3	0.13	Protein CIP2A OS=Homo sapiens GN=KIAA1524 PE=1 SV=1
512	1	UniProt_human	Q8TBM8-2	97	33450	4	4	2	2	0.29	Isoform 2 of DnaJ homolog subfamily B member 14 OS=Homo sapiens GN=DNAJB14
513	1	UniProt_human	H3BLZ8	97	80389	3	3	2	2	0.11	Probable ATP-dependent RNA helicase DDX17 OS=Homo sapiens GN=DDX17 PE=1 SV=1
514	1	UniProt_human	F8VNY2	97	38923	6	6	5	5	0.72	DNA primase (Fragment) OS=Homo sapiens GN=PRIM1 PE=1 SV=8
515	1	UniProt_human	F6VRR5	97	48073	6	6	5	5	0.55	Polymerase delta-interacting protein 3 OS=Homo sapiens GN=POLDIP3 PE=1 SV=1
516	1	UniProt_human	H7C131	96	30315	3	3	2	2	0.32	3-ketoacyl-CoA thiolase, peroxisomal (Fragment) OS=Homo sapiens GN=ACAA1 PE=1 SV=1
517	1	UniProt_human	Q8WU67	96	45979	2	2	1	1	0.1	Phospholipase ABHD3 OS=Homo sapiens GN=ABHD3 PE=1 SV=2
518	1	UniProt_human	P50402	96	28976	5	5	4	4	0.79	Emerin OS=Homo sapiens GN=EMD PE=1 SV=1
519	1	UniProt_human	A0A0A0MSN9	96	38057	2	2	2	2	0.25	Negative elongation factor E (Fragment) OS=Homo sapiens GN=NELFE PE=1 SV=6
520	1	UniProt_human	P01859	95	35878	7	7	2	2	0.42	Ig gamma-2 chain C region OS=Homo sapiens GN=IGHG2 PE=1 SV=2
521	1	UniProt_human	A0A0U1RQT9	95	14957	3	3	1	1	0.32	Synaptophysin-like protein 1 (Fragment) OS=Homo sapiens GN=SYPL1 PE=1 SV=1
522	1	UniProt_human	P49590	95	56852	6	6	4	4	0.35	Probable histidine--tRNA ligase, mitochondrial OS=Homo sapiens GN=HARS2 PE=1 SV=1
523	1	UniProt_human	C9J3R0	95	29395	3	3	3	3	0.53	Regulator of chromosome condensation (Fragment) OS=Homo sapiens GN=RCC1 PE=1 SV=8
525	1	UniProt_human	Q969Q6	95	53282	2	2	2	2	0.17	Serine/threonine-protein phosphatase 2A regulatory subunit B'' subunit gamma OS=Homo sapiens GN=PPP2R3C PE=1 SV=1
286	2	UniProt_human	P10398	94	67542	2	2	2	2	0.13	Serine/threonine-protein kinase A-Raf OS=Homo sapiens GN=ARAF PE=1 SV=2
526	1	UniProt_human	Q9Y2Z0	93	40998	2	2	2	2	0.23	Protein SGT1 homolog OS=Homo sapiens GN=SUGT1 PE=1 SV=3
527	1	UniProt_human	Q92759	93	52153	1	1	1	1	0.08	General transcription factor IIH subunit 4 OS=Homo sapiens GN=GTF2H4 PE=1 SV=1
528	1	UniProt_human	O14980	93	123306	6	6	6	6	0.23	Exportin-1 OS=Homo sapiens GN=XPO1 PE=1 SV=1
529	1	UniProt_human	Q9UDR5	92	102066	4	4	3	3	0.13	Alpha-aminoadipic semialdehyde synthase, mitochondrial OS=Homo sapiens GN=AASS PE=1 SV=1
530	1	UniProt_human	A0A087WT87	92	54173	2	2	2	2	0.17	Amino acid transporter OS=Homo sapiens GN=SLC1A3 PE=1 SV=1
531	1	UniProt_human	H0Y5K5	92	44650	3	3	2	2	0.21	Endoplasmic reticulum-Golgi intermediate compartment protein 3 (Fragment) OS=Homo sapiens GN=ERGIC3 PE=1 SV=1
524	1	UniProt_human	Q9H4K7	91	43928	3	3	2	2	0.21	Mitochondrial ribosome-associated GTPase 2 OS=Homo sapiens GN=MTG2 PE=1 SV=1
532	1	UniProt_human	O75436	91	38146	4	4	3	3	0.39	Vacuolar protein sorting-associated protein 26A OS=Homo sapiens GN=VPS26A PE=1 SV=2
533	1	UniProt_human	P14324	91	48245	5	5	4	4	0.42	Farnesyl pyrophosphate synthase OS=Homo sapiens GN=FDPS PE=1 SV=4
475	2	UniProt_human	P27986	90	83547	4	4	3	3	0.16	Phosphatidylinositol 3-kinase regulatory subunit alpha OS=Homo sapiens GN=PIK3R1 PE=1 SV=2
534	1	UniProt_human	A6NED2	90	40054	4	4	3	3	0.37	RCC1 domain-containing protein 1 OS=Homo sapiens GN=RCCD1 PE=1 SV=1
535	1	UniProt_human	Q9Y6V7	90	54192	2	2	2	2	0.17	Probable ATP-dependent RNA helicase DDX49 OS=Homo sapiens GN=DDX49 PE=1 SV=1
536	1	UniProt_human	P05026	90	35039	4	4	3	3	0.43	Sodium/potassium-transporting ATPase subunit beta-1 OS=Homo sapiens GN=ATP1B1 PE=1 SV=1
537	1	UniProt_human	Q96SZ6	90	67646	1	1	1	1	0.06	CDK5 regulatory subunit-associated protein 1 OS=Homo sapiens GN=CDK5RAP1 PE=1 SV=2
538	1	UniProt_human	B3KRF7	90	39299	5	5	1	1	0.11	Zinc finger protein with KRAB and SCAN domains 1 OS=Homo sapiens GN=ZKSCAN1 PE=1 SV=1
539	1	UniProt_human	H3BQ94	90	17234	2	2	1	1	0.27	Neuroplastin (Fragment) OS=Homo sapiens GN=NPTN PE=1 SV=1
540	1	UniProt_human	B4DEM9	90	39847	3	3	3	3	0.37	Polymerase delta-interacting protein 2 OS=Homo sapiens GN=POLDIP2 PE=1 SV=1
541	1	UniProt_human	P13639	90	95277	2	2	2	2	0.09	Elongation factor 2 OS=Homo sapiens GN=EEF2 PE=1 SV=4
542	1	UniProt_human	P49841	90	46715	6	6	4	4	0.44	Glycogen synthase kinase-3 beta OS=Homo sapiens GN=GSK3B PE=1 SV=2
543	1	UniProt_human	Q86YZ3	90	282228	3	3	3	3	0.05	Hornerin OS=Homo sapiens GN=HRNR PE=1 SV=2
268	2	UniProt_human	D6RER5	89	49777	4	4	2	2	0.19	Septin-11 OS=Homo sapiens GN=SEPT11 PE=1 SV=1
544	1	UniProt_human	R4GMV1	89	38686	2	2	2	2	0.24	E3 ubiquitin-protein ligase TRIM11 OS=Homo sapiens GN=TRIM11 PE=1 SV=1
545	1	UniProt_human	P14923	89	81693	2	2	2	2	0.11	Junction plakoglobin OS=Homo sapiens GN=JUP PE=1 SV=3
546	1	UniProt_human	G5E9S2	89	64552	2	2	2	2	0.14	Hydroxysteroid (17-beta) dehydrogenase 4, isoform CRA_a OS=Homo sapiens GN=HSD17B4 PE=1 SV=1
548	1	UniProt_human	Q9BT40	89	51058	3	3	2	2	0.18	Inositol polyphosphate 5-phosphatase K OS=Homo sapiens GN=INPP5K PE=1 SV=3
549	1	UniProt_human	Q9UKU7	88	45040	1	1	1	1	0.1	Isobutyryl-CoA dehydrogenase, mitochondrial OS=Homo sapiens GN=ACAD8 PE=1 SV=1
550	1	UniProt_human	Q9BSL1	88	45310	2	2	2	2	0.2	Ubiquitin-associated domain-containing protein 1 OS=Homo sapiens GN=UBAC1 PE=1 SV=1
551	1	UniProt_human	Q9Y2T2	88	46909	7	7	5	5	0.57	AP-3 complex subunit mu-1 OS=Homo sapiens GN=AP3M1 PE=1 SV=1
552	1	UniProt_human	A0A075B6S2	88	13135	2	2	2	2	0.88	Protein IGKV2D-29 (Fragment) OS=Homo sapiens GN=IGKV2D-29 PE=1 SV=1
553	1	UniProt_human	Q9GZL7	88	47678	3	3	3	3	0.3	Ribosome biogenesis protein WDR12 OS=Homo sapiens GN=WDR12 PE=1 SV=2
547	1	UniProt_human	Q96LA8	87	41911	3	3	3	3	0.35	Protein arginine N-methyltransferase 6 OS=Homo sapiens GN=PRMT6 PE=1 SV=1
554	1	UniProt_human	Q5R3I4	87	52753	2	2	1	1	0.08	Tetratricopeptide repeat protein 38 OS=Homo sapiens GN=TTC38 PE=1 SV=1
555	1	UniProt_human	Q96P11	87	46662	4	4	4	4	0.44	Probable 28S rRNA (cytosine-C(5))-methyltransferase OS=Homo sapiens GN=NSUN5 PE=1 SV=2
556	1	UniProt_human	B7ZAR1	87	55314	2	2	2	2	0.17	T-complex protein 1 subunit epsilon OS=Homo sapiens GN=CCT5 PE=1 SV=1
557	1	UniProt_human	J3KMZ8	87	45751	2	2	2	2	0.2	Zinc finger protein ubi-d4 OS=Homo sapiens GN=DPF2 PE=1 SV=1
558	1	UniProt_human	C9J494	87	46650	4	4	4	4	0.44	Probable E3 ubiquitin-protein ligase makorin-2 OS=Homo sapiens GN=MKRN2 PE=1 SV=1
559	1	UniProt_human	Q2TAA5	87	55615	1	1	1	1	0.08	GDP-Man:Man(3)GlcNAc(2)-PP-Dol alpha-1,2-mannosyltransferase OS=Homo sapiens GN=ALG11 PE=1 SV=2
103	2	UniProt_human	A8MZF9	86	38105	4	4	3	3	0.39	Developmentally-regulated GTP-binding protein 2 OS=Homo sapiens GN=DRG2 PE=1 SV=1
560	1	UniProt_human	H3BQC4	86	22574	1	1	1	1	0.2	Transforming growth factor beta-1-induced transcript 1 protein (Fragment) OS=Homo sapiens GN=TGFB1I1 PE=1 SV=8
561	1	UniProt_human	I3L492	86	22914	2	2	1	1	0.2	Eukaryotic peptide chain release factor subunit 1 (Fragment) OS=Homo sapiens GN=ETF1 PE=1 SV=1
562	1	UniProt_human	C9JZ87	86	12193	3	3	2	2	0.96	Transmembrane protein 106B (Fragment) OS=Homo sapiens GN=TMEM106B PE=1 SV=1
563	1	UniProt_human	P49770	86	38965	5	5	3	3	0.38	Translation initiation factor eIF-2B subunit beta OS=Homo sapiens GN=EIF2B2 PE=1 SV=3
564	1	UniProt_human	Q96A46	86	39247	2	2	2	2	0.24	Mitoferrin-2 OS=Homo sapiens GN=SLC25A28 PE=2 SV=1
469	2	UniProt_human	A0A087X2D0	85	10314	3	3	2	2	1.21	Serine/arginine-rich-splicing factor 3 OS=Homo sapiens GN=SRSF3 PE=1 SV=1
565	1	UniProt_human	K7EPA3	85	50520	1	1	1	1	0.09	Transmembrane protein 161A OS=Homo sapiens GN=TMEM161A PE=1 SV=2
566	1	UniProt_human	Q9H3G5	84	54129	4	4	4	4	0.37	Probable serine carboxypeptidase CPVL OS=Homo sapiens GN=CPVL PE=1 SV=2
567	1	UniProt_human	Q8IZV2	84	19560	1	1	1	1	0.24	CKLF-like MARVEL transmembrane domain-containing protein 8 OS=Homo sapiens GN=CMTM8 PE=1 SV=2
568	1	UniProt_human	P49356	84	48742	2	2	2	2	0.19	Protein farnesyltransferase subunit beta OS=Homo sapiens GN=FNTB PE=1 SV=1
569	1	UniProt_human	Q6PK18	84	35624	3	3	2	2	0.27	2-oxoglutarate and iron-dependent oxygenase domain-containing protein 3 OS=Homo sapiens GN=OGFOD3 PE=1 SV=2
570	1	UniProt_human	Q9Y366	83	49675	2	2	2	2	0.19	Intraflagellar transport protein 52 homolog OS=Homo sapiens GN=IFT52 PE=2 SV=3
571	1	UniProt_human	Q8IXQ3	83	21050	1	1	1	1	0.22	Uncharacterized protein C9orf40 OS=Homo sapiens GN=C9orf40 PE=1 SV=1
573	1	UniProt_human	H0YEN5	83	21140	4	4	4	4	1.21	40S ribosomal protein S2 (Fragment) OS=Homo sapiens GN=RPS2 PE=1 SV=1
522	2	UniProt_human	B3KWE1	82	49592	5	5	3	3	0.29	Histidine--tRNA ligase, cytoplasmic OS=Homo sapiens GN=HARS PE=1 SV=1
574	1	UniProt_human	A0A087WUS0	82	15343	2	2	2	2	0.72	40S ribosomal protein S24 OS=Homo sapiens GN=RPS24 PE=1 SV=1
575	1	UniProt_human	P12273	82	16562	1	1	1	1	0.29	Prolactin-inducible protein OS=Homo sapiens GN=PIP PE=1 SV=1
576	1	UniProt_human	A8MXV4	82	42207	4	4	3	3	0.35	Nucleoside diphosphate-linked moiety X motif 19 OS=Homo sapiens GN=NUDT19 PE=1 SV=1
577	1	UniProt_human	A0A087WTL9	82	21536	1	1	1	1	0.21	La-related protein 4 OS=Homo sapiens GN=LARP4 PE=1 SV=1
172	2	UniProt_human	P43034	81	46608	4	4	4	4	0.44	Platelet-activating factor acetylhydrolase IB subunit alpha OS=Homo sapiens GN=PAFAH1B1 PE=1 SV=2
578	1	UniProt_human	A0A087WTS8	81	52566	1	1	1	1	0.08	Heat shock 70 kDa protein 4 OS=Homo sapiens GN=HSPA4 PE=1 SV=1
580	1	UniProt_human	F5H4V9	81	33489	2	2	1	1	0.13	Programmed cell death protein 2 OS=Homo sapiens GN=PDCD2 PE=1 SV=1
581	1	UniProt_human	Q9NVR5	80	91058	1	1	1	1	0.05	Protein kintoun OS=Homo sapiens GN=DNAAF2 PE=1 SV=2
582	1	UniProt_human	E9PMD7	80	28879	4	4	4	4	0.79	Serine/threonine-protein phosphatase (Fragment) OS=Homo sapiens GN=PPP1CA PE=1 SV=1
583	1	UniProt_human	Q99952	80	50450	3	3	3	3	0.29	Tyrosine-protein phosphatase non-receptor type 18 OS=Homo sapiens GN=PTPN18 PE=1 SV=2
584	1	UniProt_human	P0CG40	80	48885	1	1	1	1	0.09	Transcription factor Sp9 OS=Homo sapiens GN=SP9 PE=3 SV=1
585	1	UniProt_human	H0YCB3	80	33006	5	5	4	4	0.67	Activating signal cointegrator 1 complex subunit 1 (Fragment) OS=Homo sapiens GN=ASCC1 PE=1 SV=1
586	1	UniProt_human	Q92546	80	42429	1	1	1	1	0.1	RAB6A-GEF complex partner protein 2 OS=Homo sapiens GN=RGP1 PE=1 SV=1
572	1	UniProt_human	A0A087WT55	79	29038	2	2	2	2	0.33	mRNA-decapping enzyme 1A (Fragment) OS=Homo sapiens GN=DCP1A PE=1 SV=1
579	1	UniProt_human	Q9UJT1	79	51001	2	2	2	2	0.18	Tubulin delta chain OS=Homo sapiens GN=TUBD1 PE=2 SV=2
587	1	UniProt_human	E9PE82	79	43984	2	2	2	2	0.21	Short-chain-specific acyl-CoA dehydrogenase, mitochondrial OS=Homo sapiens GN=ACADS PE=1 SV=1
588	1	UniProt_human	Q9H4P4	79	35882	5	5	2	2	0.26	E3 ubiquitin-protein ligase NRDP1 OS=Homo sapiens GN=RNF41 PE=1 SV=2
589	1	UniProt_human	P30307	79	53331	3	3	2	2	0.17	M-phase inducer phosphatase 3 OS=Homo sapiens GN=CDC25C PE=1 SV=2
590	1	UniProt_human	G5E9W8	79	21496	3	3	2	2	0.47	Glycogenin 1, isoform CRA_e OS=Homo sapiens GN=GYG1 PE=1 SV=1
591	1	UniProt_human	Q8IZV5	79	38062	5	5	3	3	0.39	Retinol dehydrogenase 10 OS=Homo sapiens GN=RDH10 PE=1 SV=1
592	1	UniProt_human	Q9UHR6	79	42857	2	2	2	2	0.22	Zinc finger HIT domain-containing protein 2 OS=Homo sapiens GN=ZNHIT2 PE=1 SV=1
593	1	UniProt_human	Q9Y3P4	78	40458	1	1	1	1	0.11	Rhomboid domain-containing protein 3 OS=Homo sapiens GN=RHBDD3 PE=2 SV=1
594	1	UniProt_human	P14868	78	57100	2	2	2	2	0.16	Aspartate--tRNA ligase, cytoplasmic OS=Homo sapiens GN=DARS PE=1 SV=2
595	1	UniProt_human	P25311	78	34237	3	3	2	2	0.28	Zinc-alpha-2-glycoprotein OS=Homo sapiens GN=AZGP1 PE=1 SV=2
596	1	UniProt_human	P00505	77	47487	4	4	3	3	0.31	Aspartate aminotransferase, mitochondrial OS=Homo sapiens GN=GOT2 PE=1 SV=3
597	1	UniProt_human	H0Y2Y0	77	8898	2	2	1	1	0.58	Cysteine protease ATG4B (Fragment) OS=Homo sapiens GN=ATG4B PE=1 SV=1
598	1	UniProt_human	Q08554	77	99924	2	2	1	1	0.04	Desmocollin-1 OS=Homo sapiens GN=DSC1 PE=1 SV=2
599	1	UniProt_human	B4DP62	77	23195	3	3	1	1	0.2	Solute carrier family 25 (Mitochondrial carrier citrate transporter), member 1, isoform CRA_b OS=Homo sapiens GN=SLC25A1 PE=1 SV=1
600	1	UniProt_human	E9PLD2	77	21178	3	3	3	3	0.81	Mitochondrial fission regulator 1-like OS=Homo sapiens GN=MTFR1L PE=1 SV=1
601	1	UniProt_human	A0A087WW20	76	32242	2	2	2	2	0.3	RUN and SH3 domain-containing protein 1 (Fragment) OS=Homo sapiens GN=RUSC1 PE=1 SV=1
602	1	UniProt_human	A0A0A0MR51	76	57849	4	4	3	3	0.25	Fatty acid desaturase 1 OS=Homo sapiens GN=FADS1 PE=1 SV=1
603	1	UniProt_human	U3KQG0	76	71439	1	1	1	1	0.06	Threonine--tRNA ligase, mitochondrial OS=Homo sapiens GN=TARS2 PE=1 SV=1
604	1	UniProt_human	Q6ZT21	76	49421	3	3	2	2	0.19	Transmembrane protein with metallophosphoesterase domain OS=Homo sapiens GN=TMPPE PE=2 SV=2
605	1	UniProt_human	Q5TDE7	76	29286	2	2	2	2	0.33	E3 ubiquitin-protein ligase RNF220 (Fragment) OS=Homo sapiens GN=RNF220 PE=1 SV=1
606	1	UniProt_human	Q96N66	76	52730	2	2	1	1	0.08	Lysophospholipid acyltransferase 7 OS=Homo sapiens GN=MBOAT7 PE=1 SV=2
607	1	UniProt_human	B4DY26	76	48844	3	3	3	3	0.3	Receptor protein serine/threonine kinase OS=Homo sapiens GN=TGFBR1 PE=1 SV=1
608	1	UniProt_human	P11177	75	39208	1	1	1	1	0.11	Pyruvate dehydrogenase E1 component subunit beta, mitochondrial OS=Homo sapiens GN=PDHB PE=1 SV=3
609	1	UniProt_human	Q9H0K1	75	103849	2	2	2	2	0.09	Serine/threonine-protein kinase SIK2 OS=Homo sapiens GN=SIK2 PE=1 SV=1
610	1	UniProt_human	P13995	75	37871	3	3	2	2	0.25	Bifunctional methylenetetrahydrofolate dehydrogenase/cyclohydrolase, mitochondrial OS=Homo sapiens GN=MTHFD2 PE=1 SV=2
611	1	UniProt_human	B4DMT0	75	47687	1	1	1	1	0.09	Transmembrane protein 143 OS=Homo sapiens GN=TMEM143 PE=1 SV=1
612	1	UniProt_human	Q969V3	75	62935	3	3	3	3	0.22	Nicalin OS=Homo sapiens GN=NCLN PE=1 SV=2
613	1	UniProt_human	Q3MIR4	75	38916	2	2	1	1	0.11	Cell cycle control protein 50B OS=Homo sapiens GN=TMEM30B PE=1 SV=1
614	1	UniProt_human	P48651	75	55491	1	1	1	1	0.08	Phosphatidylserine synthase 1 OS=Homo sapiens GN=PTDSS1 PE=1 SV=1
615	1	UniProt_human	E9PSD3	74	39289	3	3	3	3	0.38	Acidic fibroblast growth factor intracellular-binding protein OS=Homo sapiens GN=FIBP PE=1 SV=1
616	1	UniProt_human	Q99871	74	40752	2	2	2	2	0.23	HAUS augmin-like complex subunit 7 OS=Homo sapiens GN=HAUS7 PE=1 SV=3
617	1	UniProt_human	E9PG71	74	105648	2	2	2	2	0.08	Ephrin type-A receptor 4 OS=Homo sapiens GN=EPHA4 PE=1 SV=1
618	1	UniProt_human	G3V2L5	73	9353	1	1	1	1	0.55	Ubiquinone biosynthesis monooxygenase COQ6, mitochondrial OS=Homo sapiens GN=COQ6 PE=1 SV=1
619	1	UniProt_human	Q6PI48	73	73516	2	2	2	2	0.12	Aspartate--tRNA ligase, mitochondrial OS=Homo sapiens GN=DARS2 PE=1 SV=1
620	1	UniProt_human	P11166	73	54049	4	4	2	2	0.17	Solute carrier family 2, facilitated glucose transporter member 1 OS=Homo sapiens GN=SLC2A1 PE=1 SV=2
621	1	UniProt_human	H3BNX3	73	31750	2	2	2	2	0.3	Uncharacterized protein (Fragment) OS=Homo sapiens PE=4 SV=1
622	1	UniProt_human	Q8IYU8	73	49634	1	1	1	1	0.09	Calcium uptake protein 2, mitochondrial OS=Homo sapiens GN=MICU2 PE=1 SV=2
623	1	UniProt_human	Q5JR95	73	21866	2	2	2	2	0.47	40S ribosomal protein S8 OS=Homo sapiens GN=RPS8 PE=1 SV=1
624	1	UniProt_human	J3KSD8	73	30244	3	3	2	2	0.32	Bleomycin hydrolase (Fragment) OS=Homo sapiens GN=BLMH PE=1 SV=8
625	1	UniProt_human	C9IZQ1	73	33866	1	1	1	1	0.13	Translocon-associated protein subunit alpha OS=Homo sapiens GN=SSR1 PE=1 SV=1
626	1	UniProt_human	P01024	73	187030	2	2	2	2	0.05	Complement C3 OS=Homo sapiens GN=C3 PE=1 SV=2
627	1	UniProt_human	D6R9L0	72	32553	1	1	1	1	0.14	Receptor of-activated protein C kinase 1 (Fragment) OS=Homo sapiens GN=RACK1 PE=1 SV=1
628	1	UniProt_human	A0A0C4DFL7	72	57242	1	1	1	1	0.08	Lanosterol 14-alpha demethylase OS=Homo sapiens GN=CYP51A1 PE=1 SV=1
629	1	UniProt_human	Q9Y287	72	30318	2	2	2	2	0.32	Integral membrane protein 2B OS=Homo sapiens GN=ITM2B PE=1 SV=1
630	1	UniProt_human	D6R918	72	8282	3	3	1	1	0.63	OCIA domain-containing protein 1 (Fragment) OS=Homo sapiens GN=OCIAD1 PE=1 SV=1
631	1	UniProt_human	A0A0C4DGW0	72	27062	2	2	1	1	0.17	NEDD4 family-interacting protein 2 OS=Homo sapiens GN=NDFIP2 PE=1 SV=1
632	1	UniProt_human	P07954	71	54602	2	2	2	2	0.17	Fumarate hydratase, mitochondrial OS=Homo sapiens GN=FH PE=1 SV=3
633	1	UniProt_human	Q9H649	71	38220	2	2	2	2	0.25	Putative methyltransferase NSUN3 OS=Homo sapiens GN=NSUN3 PE=2 SV=1
634	1	UniProt_human	Q96SQ9	71	55781	6	6	4	4	0.35	Cytochrome P450 2S1 OS=Homo sapiens GN=CYP2S1 PE=1 SV=2
635	1	UniProt_human	P23381	71	53132	2	2	2	2	0.17	Tryptophan--tRNA ligase, cytoplasmic OS=Homo sapiens GN=WARS PE=1 SV=2
636	1	UniProt_human	Q92504	71	50087	2	2	1	1	0.09	Zinc transporter SLC39A7 OS=Homo sapiens GN=SLC39A7 PE=1 SV=2
637	1	UniProt_human	A0A0A0MTL5	71	48854	1	1	1	1	0.09	S-phase kinase-associated protein 2 OS=Homo sapiens GN=SKP2 PE=1 SV=1
638	1	UniProt_human	G3V3A4	70	65351	1	1	1	1	0.07	SNW domain-containing protein 1 OS=Homo sapiens GN=SNW1 PE=1 SV=1
639	1	UniProt_human	F6TX30	70	44055	1	1	1	1	0.1	Ankyrin repeat and SOCS box protein 6 OS=Homo sapiens GN=ASB6 PE=1 SV=1
640	1	UniProt_human	Q96L14	70	32628	1	1	1	1	0.14	Cep170-like protein OS=Homo sapiens GN=CEP170P1 PE=5 SV=2
641	1	UniProt_human	Q9Y240	70	35672	1	1	1	1	0.13	C-type lectin domain family 11 member A OS=Homo sapiens GN=CLEC11A PE=1 SV=1
642	1	UniProt_human	Q01650	70	54974	2	2	2	2	0.17	Large neutral amino acids transporter small subunit 1 OS=Homo sapiens GN=SLC7A5 PE=1 SV=2
643	1	UniProt_human	Q9Y617	70	40397	3	3	2	2	0.23	Phosphoserine aminotransferase OS=Homo sapiens GN=PSAT1 PE=1 SV=2
644	1	UniProt_human	D6RAA6	70	25207	1	1	1	1	0.18	Transmembrane protein 33 (Fragment) OS=Homo sapiens GN=TMEM33 PE=1 SV=1
645	1	UniProt_human	A0A0C4DGX8	70	31590	1	1	1	1	0.14	ATPase, H+ transporting, lysosomal accessory protein 1, isoform CRA_c OS=Homo sapiens GN=ATP6AP1 PE=1 SV=1
646	1	UniProt_human	P82673	70	36821	5	5	4	4	0.58	28S ribosomal protein S35, mitochondrial OS=Homo sapiens GN=MRPS35 PE=1 SV=1
647	1	UniProt_human	D6RCB6	70	12405	1	1	1	1	0.39	Bifunctional lysine-specific demethylase and histidyl-hydroxylase MINA (Fragment) OS=Homo sapiens GN=MINA PE=1 SV=1
513	2	UniProt_human	A0A0D9SF53	69	81426	2	2	2	2	0.11	ATP-dependent RNA helicase DDX3X OS=Homo sapiens GN=DDX3X PE=1 SV=1
648	1	UniProt_human	A0A0G2JLR5	69	36295	1	1	1	1	0.12	Ras association domain-containing protein 7 OS=Homo sapiens GN=RASSF7 PE=1 SV=1
649	1	UniProt_human	A0A087WY58	69	56649	1	1	1	1	0.08	Serine/threonine-protein kinase Nek3 OS=Homo sapiens GN=NEK3 PE=1 SV=1
650	1	UniProt_human	Q15050	69	41168	2	2	2	2	0.23	Ribosome biogenesis regulatory protein homolog OS=Homo sapiens GN=RRS1 PE=1 SV=2
651	1	UniProt_human	H0YKS4	69	19518	2	2	2	2	0.53	Annexin (Fragment) OS=Homo sapiens GN=ANXA2 PE=1 SV=1
652	1	UniProt_human	Q86YH6	69	44101	2	2	2	2	0.21	Decaprenyl-diphosphate synthase subunit 2 OS=Homo sapiens GN=PDSS2 PE=1 SV=2
653	1	UniProt_human	J3KPP4	69	58185	1	1	1	1	0.08	Cisplatin resistance-associated overexpressed protein, isoform CRA_b OS=Homo sapiens GN=LUC7L3 PE=1 SV=1
654	1	UniProt_human	A6PVU8	69	38003	2	2	2	2	0.25	Tuftelin OS=Homo sapiens GN=TUFT1 PE=1 SV=1
655	1	UniProt_human	A0A0A0MS74	69	47502	3	3	1	1	0.09	Phosphoenolpyruvate carboxykinase [GTP], mitochondrial OS=Homo sapiens GN=PCK2 PE=1 SV=1
656	1	UniProt_human	Q96PK6	68	69449	1	1	1	1	0.06	RNA-binding protein 14 OS=Homo sapiens GN=RBM14 PE=1 SV=2
657	1	UniProt_human	Q9HAW0	68	46504	1	1	1	1	0.1	Transcription factor IIIB 50 kDa subunit OS=Homo sapiens GN=BRF2 PE=1 SV=1
658	1	UniProt_human	Q96BY7	68	232616	1	1	1	1	0.02	Autophagy-related protein 2 homolog B OS=Homo sapiens GN=ATG2B PE=1 SV=5
659	1	UniProt_human	Q15054	67	51368	3	3	2	2	0.18	DNA polymerase delta subunit 3 OS=Homo sapiens GN=POLD3 PE=1 SV=2
660	1	UniProt_human	Q8IXX5	67	42799	2	2	2	2	0.22	Transmembrane protein 183A OS=Homo sapiens GN=TMEM183A PE=1 SV=2
661	1	UniProt_human	P62753	67	28663	2	2	2	2	0.34	40S ribosomal protein S6 OS=Homo sapiens GN=RPS6 PE=1 SV=1
662	1	UniProt_human	H7C279	67	27882	2	2	2	2	0.35	Serine/threonine-protein kinase 25 (Fragment) OS=Homo sapiens GN=STK25 PE=1 SV=1
663	1	UniProt_human	H3BUB4	67	23060	1	1	1	1	0.2	Snurportin-1 (Fragment) OS=Homo sapiens GN=SNUPN PE=1 SV=1
664	1	UniProt_human	P30837	67	57170	2	2	2	2	0.16	Aldehyde dehydrogenase X, mitochondrial OS=Homo sapiens GN=ALDH1B1 PE=1 SV=3
665	1	UniProt_human	H7C003	67	38721	2	2	2	2	0.24	Protein phosphatase 1 regulatory subunit 7 (Fragment) OS=Homo sapiens GN=PPP1R7 PE=1 SV=1
666	1	UniProt_human	A0A087WUW6	66	47355	1	1	1	1	0.09	NF-kappa-B essential modulator OS=Homo sapiens GN=IKBKG PE=1 SV=1
667	1	UniProt_human	B4DEB1	66	14044	2	2	1	1	0.34	Histone H3 OS=Homo sapiens GN=H3F3A PE=1 SV=1
668	1	UniProt_human	Q9UK39	66	48165	1	1	1	1	0.09	Nocturnin OS=Homo sapiens GN=NOCT PE=2 SV=2
669	1	UniProt_human	Q02539	66	21829	1	1	1	1	0.21	Histone H1.1 OS=Homo sapiens GN=HIST1H1A PE=1 SV=3
670	1	UniProt_human	P17028	66	42129	1	1	1	1	0.11	Zinc finger protein 24 OS=Homo sapiens GN=ZNF24 PE=1 SV=4
671	1	UniProt_human	Q8NC51	66	44938	2	2	2	2	0.21	Plasminogen activator inhibitor 1 RNA-binding protein OS=Homo sapiens GN=SERBP1 PE=1 SV=2
672	1	UniProt_human	A0A087WTA5	65	57460	1	1	1	1	0.08	Translation initiation factor eIF-2B subunit delta OS=Homo sapiens GN=EIF2B4 PE=1 SV=1
673	1	UniProt_human	Q6PML9	65	63475	2	2	1	1	0.07	Zinc transporter 9 OS=Homo sapiens GN=SLC30A9 PE=1 SV=1
674	1	UniProt_human	Q96CB9	65	43061	1	1	1	1	0.1	5-methylcytosine rRNA methyltransferase NSUN4 OS=Homo sapiens GN=NSUN4 PE=1 SV=2
675	1	UniProt_human	H7BZN1	65	15760	1	1	1	1	0.3	Choline-phosphate cytidylyltransferase A (Fragment) OS=Homo sapiens GN=PCYT1A PE=1 SV=1
676	1	UniProt_human	Q9Y5A9	65	62296	2	2	2	2	0.15	YTH domain-containing family protein 2 OS=Homo sapiens GN=YTHDF2 PE=1 SV=2
677	1	UniProt_human	H0Y368	65	33308	1	1	1	1	0.13	Dolichol-phosphate mannosyltransferase subunit 1 (Fragment) OS=Homo sapiens GN=DPM1 PE=1 SV=1
678	1	UniProt_human	Q8N7R7	65	40679	1	1	1	1	0.11	Cyclin-Y-like protein 1 OS=Homo sapiens GN=CCNYL1 PE=1 SV=2
679	1	UniProt_human	Q96I25	64	44934	3	3	2	2	0.21	Splicing factor 45 OS=Homo sapiens GN=RBM17 PE=1 SV=1
680	1	UniProt_human	H3BU82	64	38494	1	1	1	1	0.12	Aladin (Fragment) OS=Homo sapiens GN=AAAS PE=1 SV=1
681	1	UniProt_human	Q99741	64	62681	1	1	1	1	0.07	Cell division control protein 6 homolog OS=Homo sapiens GN=CDC6 PE=1 SV=1
682	1	UniProt_human	Q9H871	64	43964	3	3	2	2	0.21	Protein RMD5 homolog A OS=Homo sapiens GN=RMND5A PE=1 SV=1
683	1	UniProt_human	Q9Y303	64	43721	2	2	2	2	0.21	N-acetylglucosamine-6-phosphate deacetylase OS=Homo sapiens GN=AMDHD2 PE=1 SV=2
684	1	UniProt_human	Q8NE62	63	65317	1	1	1	1	0.07	Choline dehydrogenase, mitochondrial OS=Homo sapiens GN=CHDH PE=1 SV=2
685	1	UniProt_human	Q13895	63	49570	3	3	2	2	0.19	Bystin OS=Homo sapiens GN=BYSL PE=1 SV=3
686	1	UniProt_human	Q8NBS9	63	47599	5	5	2	2	0.19	Thioredoxin domain-containing protein 5 OS=Homo sapiens GN=TXNDC5 PE=1 SV=2
687	1	UniProt_human	A0A087WV97	63	46352	3	3	3	3	0.31	Stromal membrane-associated protein 2 OS=Homo sapiens GN=SMAP2 PE=1 SV=1
688	1	UniProt_human	Q8NHP8	63	65430	2	2	1	1	0.07	Putative phospholipase B-like 2 OS=Homo sapiens GN=PLBD2 PE=1 SV=2
689	1	UniProt_human	P10599	63	11730	1	1	1	1	0.42	Thioredoxin OS=Homo sapiens GN=TXN PE=1 SV=3
690	1	UniProt_human	P26196	62	54382	3	3	2	2	0.17	Probable ATP-dependent RNA helicase DDX6 OS=Homo sapiens GN=DDX6 PE=1 SV=2
691	1	UniProt_human	Q14126	62	122218	1	1	1	1	0.04	Desmoglein-2 OS=Homo sapiens GN=DSG2 PE=1 SV=2
692	1	UniProt_human	Q96EM0	62	38113	3	3	2	2	0.25	Trans-3-hydroxy-L-proline dehydratase OS=Homo sapiens GN=L3HYPDH PE=1 SV=2
693	1	UniProt_human	Q5TF85	61	59082	1	1	1	1	0.07	Family with sequence similarity 46, member A, isoform CRA_a OS=Homo sapiens GN=FAM46A PE=1 SV=1
694	1	UniProt_human	Q13112	61	61454	2	2	2	2	0.15	Chromatin assembly factor 1 subunit B OS=Homo sapiens GN=CHAF1B PE=1 SV=1
695	1	UniProt_human	P50552	61	39805	2	2	1	1	0.11	Vasodilator-stimulated phosphoprotein OS=Homo sapiens GN=VASP PE=1 SV=3
696	1	UniProt_human	P30520	61	50066	2	2	1	1	0.09	Adenylosuccinate synthetase isozyme 2 OS=Homo sapiens GN=ADSS PE=1 SV=3
697	1	UniProt_human	H3BNS8	61	8414	1	1	1	1	0.62	Ubiquitin carboxyl-terminal hydrolase 10 (Fragment) OS=Homo sapiens GN=USP10 PE=1 SV=1
698	1	UniProt_human	A0A0A0MRI2	60	47774	5	5	4	4	0.42	Sorting nexin 6, isoform CRA_b OS=Homo sapiens GN=SNX6 PE=1 SV=1
699	1	UniProt_human	P0DN76	60	27854	2	2	2	2	0.35	Splicing factor U2AF 35 kDa subunit-like protein OS=Homo sapiens GN=U2AF1L5 PE=1 SV=1
700	1	UniProt_human	Q96LT7	60	54293	1	1	1	1	0.08	Protein C9orf72 OS=Homo sapiens GN=C9orf72 PE=1 SV=2
701	1	UniProt_human	B0YIW6	60	61587	1	1	1	1	0.07	Archain 1, isoform CRA_a OS=Homo sapiens GN=ARCN1 PE=1 SV=1
702	1	UniProt_human	Q96A33	60	55838	1	1	1	1	0.08	Coiled-coil domain-containing protein 47 OS=Homo sapiens GN=CCDC47 PE=1 SV=1
703	1	UniProt_human	H0YKL0	60	13563	2	2	2	2	0.84	High mobility group protein 20A (Fragment) OS=Homo sapiens GN=HMG20A PE=1 SV=1
704	1	UniProt_human	Q96E29	59	47941	2	2	2	2	0.19	Transcription termination factor 3, mitochondrial OS=Homo sapiens GN=MTERF3 PE=1 SV=2
705	1	UniProt_human	A0A0A0MSZ4	59	57306	3	3	2	2	0.16	NADPH:adrenodoxin oxidoreductase, mitochondrial OS=Homo sapiens GN=FDXR PE=1 SV=1
706	1	UniProt_human	Q9BTY2	59	54032	3	3	3	3	0.26	Plasma alpha-L-fucosidase OS=Homo sapiens GN=FUCA2 PE=1 SV=2
707	1	UniProt_human	J3KSR8	59	16441	1	1	1	1	0.29	Serine/arginine-rich-splicing factor 1 (Fragment) OS=Homo sapiens GN=SRSF1 PE=1 SV=1
708	1	UniProt_human	D6REB4	59	39883	2	2	1	1	0.11	Polyadenylate-binding protein-interacting protein 1 OS=Homo sapiens GN=PAIP1 PE=1 SV=1
709	1	UniProt_human	Q9NWZ5	59	61103	2	2	2	2	0.15	Uridine-cytidine kinase-like 1 OS=Homo sapiens GN=UCKL1 PE=1 SV=2
710	1	UniProt_human	A0A0G2JRX7	59	16936	2	2	1	1	0.28	Melanoma antigen preferentially-expressed in tumors (Fragment) OS=Homo sapiens GN=PRAME PE=1 SV=1
711	1	UniProt_human	Q5D862	59	247928	3	3	2	2	0.03	Filaggrin-2 OS=Homo sapiens GN=FLG2 PE=1 SV=1
712	1	UniProt_human	O95363	58	52324	3	3	3	3	0.27	Phenylalanine--tRNA ligase, mitochondrial OS=Homo sapiens GN=FARS2 PE=1 SV=1
713	1	UniProt_human	A0A0C4DFR6	58	35834	1	1	1	1	0.12	Protein SEC13 homolog OS=Homo sapiens GN=SEC13 PE=1 SV=1
714	1	UniProt_human	Q9UBI4-2	58	37146	2	2	2	2	0.25	Isoform 2 of Stomatin-like protein 1 OS=Homo sapiens GN=STOML1
715	1	UniProt_human	A6NLH6	58	15760	2	2	1	1	0.3	Protein cornichon homolog 4 OS=Homo sapiens GN=CNIH4 PE=1 SV=1
716	1	UniProt_human	A0A1B0GU83	58	11305	1	1	1	1	0.44	Very-long-chain 3-oxoacyl-CoA reductase OS=Homo sapiens GN=HSD17B12 PE=4 SV=1
717	1	UniProt_human	Q96ER9	58	45783	1	1	1	1	0.1	Coiled-coil domain-containing protein 51 OS=Homo sapiens GN=CCDC51 PE=1 SV=2
718	1	UniProt_human	H0YLA4	58	36206	1	1	1	1	0.12	Sorbitol dehydrogenase OS=Homo sapiens GN=SORD PE=1 SV=1
719	1	UniProt_human	Q92625	58	123032	2	2	2	2	0.07	Ankyrin repeat and SAM domain-containing protein 1A OS=Homo sapiens GN=ANKS1A PE=1 SV=4
720	1	UniProt_human	A0A087WVT6	58	37748	1	1	1	1	0.12	Single-stranded DNA-binding protein 3 OS=Homo sapiens GN=SSBP3 PE=1 SV=1
721	1	UniProt_human	Q96BN2	58	37358	1	1	1	1	0.12	Transcriptional adapter 1 OS=Homo sapiens GN=TADA1 PE=1 SV=1
722	1	UniProt_human	A0A087WW40	57	44233	1	1	1	1	0.1	Endophilin-B1 OS=Homo sapiens GN=SH3GLB1 PE=1 SV=1
723	1	UniProt_human	O95400	57	37623	2	2	2	2	0.25	CD2 antigen cytoplasmic tail-binding protein 2 OS=Homo sapiens GN=CD2BP2 PE=1 SV=1
724	1	UniProt_human	Q15555	57	37008	2	2	2	2	0.26	Microtubule-associated protein RP/EB family member 2 OS=Homo sapiens GN=MAPRE2 PE=1 SV=1
725	1	UniProt_human	Q13601	57	43638	2	2	2	2	0.21	KRR1 small subunit processome component homolog OS=Homo sapiens GN=KRR1 PE=1 SV=4
726	1	UniProt_human	F8VP97	57	34474	1	1	1	1	0.13	CCR4-NOT transcription complex subunit 2 (Fragment) OS=Homo sapiens GN=CNOT2 PE=1 SV=1
727	1	UniProt_human	D6RFW2	57	16035	1	1	1	1	0.3	2-hydroxyacylsphingosine 1-beta-galactosyltransferase (Fragment) OS=Homo sapiens GN=UGT8 PE=1 SV=1
728	1	UniProt_human	X6R5A3	57	34439	1	1	1	1	0.13	TRAF and TNF receptor associated protein, isoform CRA_b OS=Homo sapiens GN=TDP2 PE=1 SV=1
729	1	UniProt_human	Q8IXV7	57	37652	1	1	1	1	0.12	Kelch domain-containing protein 8B OS=Homo sapiens GN=KLHDC8B PE=2 SV=1
730	1	UniProt_human	Q3SY69	57	101681	1	1	1	1	0.04	Mitochondrial 10-formyltetrahydrofolate dehydrogenase OS=Homo sapiens GN=ALDH1L2 PE=1 SV=2
731	1	UniProt_human	Q15024	57	31801	1	1	1	1	0.14	Exosome complex component RRP42 OS=Homo sapiens GN=EXOSC7 PE=1 SV=3
732	1	UniProt_human	E5RHC5	56	29110	1	1	1	1	0.16	ADP-ribosylation factor GTPase-activating protein 1 (Fragment) OS=Homo sapiens GN=ARFGAP1 PE=1 SV=2
733	1	UniProt_human	B3KVN2	56	27426	1	1	1	1	0.17	Farnesyltransferase, CAAX box, alpha, isoform CRA_c OS=Homo sapiens GN=FNTA PE=1 SV=1
734	1	UniProt_human	P07099	56	52915	1	1	1	1	0.08	Epoxide hydrolase 1 OS=Homo sapiens GN=EPHX1 PE=1 SV=1
735	1	UniProt_human	P81605	56	11277	2	2	2	2	1.07	Dermcidin OS=Homo sapiens GN=DCD PE=1 SV=2
736	1	UniProt_human	H0YHE2	56	73432	1	1	1	1	0.06	Intraflagellar transport protein 81 homolog (Fragment) OS=Homo sapiens GN=IFT81 PE=1 SV=1
737	1	UniProt_human	Q86UL3	56	52037	1	1	1	1	0.08	Glycerol-3-phosphate acyltransferase 4 OS=Homo sapiens GN=GPAT4 PE=1 SV=1
738	1	UniProt_human	A0A0A0MSM0	56	88786	1	1	1	1	0.05	Heat shock protein 105 kDa OS=Homo sapiens GN=HSPH1 PE=1 SV=1
739	1	UniProt_human	Q9BT25	56	44830	1	1	1	1	0.1	HAUS augmin-like complex subunit 8 OS=Homo sapiens GN=HAUS8 PE=1 SV=3
740	1	UniProt_human	A0A1B0GU19	56	30290	3	3	2	2	0.32	Phosphatidylinositol N-acetylglucosaminyltransferase subunit A OS=Homo sapiens GN=PIGA PE=4 SV=1
741	1	UniProt_human	Q5T6W2	56	41781	1	1	1	1	0.11	Heterogeneous nuclear ribonucleoprotein K (Fragment) OS=Homo sapiens GN=HNRNPK PE=1 SV=1
742	1	UniProt_human	Q5QPI7	55	24622	2	2	2	2	0.41	Ectonucleoside triphosphate diphosphohydrolase 6 (Fragment) OS=Homo sapiens GN=ENTPD6 PE=1 SV=1
743	1	UniProt_human	P17174	55	46219	1	1	1	1	0.1	Aspartate aminotransferase, cytoplasmic OS=Homo sapiens GN=GOT1 PE=1 SV=3
744	1	UniProt_human	Q9NZB8	55	70061	1	1	1	1	0.06	Molybdenum cofactor biosynthesis protein 1 OS=Homo sapiens GN=MOCS1 PE=1 SV=3
745	1	UniProt_human	Q99805	55	75725	2	2	2	2	0.12	Transmembrane 9 superfamily member 2 OS=Homo sapiens GN=TM9SF2 PE=1 SV=1
746	1	UniProt_human	H0YFP2	55	4198	1	1	1	1	1.51	WD repeat-containing protein 74 (Fragment) OS=Homo sapiens GN=WDR74 PE=1 SV=1
747	1	UniProt_human	A0A1B0GV31	55	30982	2	2	2	2	0.31	Protein ABHD14A-ACY1 (Fragment) OS=Homo sapiens GN=ABHD14A-ACY1 PE=4 SV=1
748	1	UniProt_human	Q9BU76	55	29394	1	1	1	1	0.15	Multiple myeloma tumor-associated protein 2 OS=Homo sapiens GN=MMTAG2 PE=1 SV=1
749	1	UniProt_human	G3V541	55	32225	3	3	3	3	0.48	HAUS augmin-like complex subunit 4 (Fragment) OS=Homo sapiens GN=HAUS4 PE=1 SV=1
750	1	UniProt_human	Q12933	55	55823	1	1	1	1	0.08	TNF receptor-associated factor 2 OS=Homo sapiens GN=TRAF2 PE=1 SV=2
532	2	UniProt_human	Q4G0F5	54	39130	2	2	2	2	0.24	Vacuolar protein sorting-associated protein 26B OS=Homo sapiens GN=VPS26B PE=1 SV=2
751	1	UniProt_human	A0A087WZU8	54	42554	2	2	2	2	0.22	Cellular tumor antigen p53 OS=Homo sapiens GN=TP53 PE=1 SV=1
752	1	UniProt_human	C9JNW5	54	17532	1	1	1	1	0.27	60S ribosomal protein L24 OS=Homo sapiens GN=RPL24 PE=1 SV=1
753	1	UniProt_human	A2RQR6	54	21527	2	2	2	2	0.47	Transcription elongation factor A (SII)-like 4 variant 1 OS=Homo sapiens GN=TCEAL4 PE=1 SV=1
754	1	UniProt_human	Q5QPL9	54	24650	2	2	2	2	0.41	RNA-binding protein Raly (Fragment) OS=Homo sapiens GN=RALY PE=1 SV=1
755	1	UniProt_human	A0A087WTT1	54	58499	1	1	1	1	0.08	Polyadenylate-binding protein OS=Homo sapiens GN=PABPC1 PE=1 SV=1
756	1	UniProt_human	Q7L592	54	49206	2	2	2	2	0.19	NADH dehydrogenase [ubiquinone] complex I, assembly factor 7 OS=Homo sapiens GN=NDUFAF7 PE=1 SV=1
757	1	UniProt_human	A0A0A0MSK5	54	52374	1	1	1	1	0.08	Torsin-1A-interacting protein 1 OS=Homo sapiens GN=TOR1AIP1 PE=1 SV=1
758	1	UniProt_human	Q9ULX6	54	71604	3	3	3	3	0.19	A-kinase anchor protein 8-like OS=Homo sapiens GN=AKAP8L PE=1 SV=3
759	1	UniProt_human	Q0VF49	54	135223	1	1	1	1	0.03	Uncharacterized protein KIAA2012 OS=Homo sapiens GN=KIAA2012 PE=2 SV=2
760	1	UniProt_human	P36551	54	50120	3	3	3	3	0.29	Oxygen-dependent coproporphyrinogen-III oxidase, mitochondrial OS=Homo sapiens GN=CPOX PE=1 SV=3
761	1	UniProt_human	A0A087WXK8	54	67622	1	1	1	1	0.06	Chromosome 20 open reading frame 129 OS=Homo sapiens GN=FAM83D PE=1 SV=1
762	1	UniProt_human	P30533	54	41441	1	1	1	1	0.11	Alpha-2-macroglobulin receptor-associated protein OS=Homo sapiens GN=LRPAP1 PE=1 SV=1
763	1	UniProt_human	G3V115	54	44903	1	1	1	1	0.1	Leucine rich repeat containing 34, isoform CRA_b OS=Homo sapiens GN=LRRC34 PE=1 SV=1
764	1	UniProt_human	Q08752	53	40738	1	1	1	1	0.11	Peptidyl-prolyl cis-trans isomerase D OS=Homo sapiens GN=PPID PE=1 SV=3
765	1	UniProt_human	Q8TF72	53	216724	1	1	1	1	0.02	Protein Shroom3 OS=Homo sapiens GN=SHROOM3 PE=1 SV=2
766	1	UniProt_human	O00400	53	60870	2	2	2	2	0.15	Acetyl-coenzyme A transporter 1 OS=Homo sapiens GN=SLC33A1 PE=1 SV=1
767	1	UniProt_human	E9PPJ0	53	98109	1	1	1	1	0.04	Splicing factor 3B subunit 2 OS=Homo sapiens GN=SF3B2 PE=1 SV=1
768	1	UniProt_human	B5MCV2	53	41750	1	1	1	1	0.11	D-2-hydroxyglutarate dehydrogenase, mitochondrial OS=Homo sapiens GN=D2HGDH PE=1 SV=1
769	1	UniProt_human	J3KTM9	53	76512	1	1	1	1	0.06	Importin subunit beta-1 (Fragment) OS=Homo sapiens GN=KPNB1 PE=1 SV=1
770	1	UniProt_human	O14908	53	36027	3	3	3	3	0.42	PDZ domain-containing protein GIPC1 OS=Homo sapiens GN=GIPC1 PE=1 SV=2
771	1	UniProt_human	Q6JQN1	53	118758	2	2	1	1	0.04	Acyl-CoA dehydrogenase family member 10 OS=Homo sapiens GN=ACAD10 PE=1 SV=1
772	1	UniProt_human	B7Z6A5	53	31298	2	2	2	2	0.31	Transmembrane protein 161B OS=Homo sapiens GN=TMEM161B PE=1 SV=1
773	1	UniProt_human	Q92522	53	22474	1	1	1	1	0.21	Histone H1x OS=Homo sapiens GN=H1FX PE=1 SV=1
774	1	UniProt_human	A0A0A0MSI3	53	22577	1	1	1	1	0.2	Phosphotriesterase-related protein OS=Homo sapiens GN=PTER PE=1 SV=1
775	1	UniProt_human	Q15018	52	46872	1	1	1	1	0.09	BRISC complex subunit Abro1 OS=Homo sapiens GN=FAM175B PE=1 SV=2
776	1	UniProt_human	P35030	52	32508	3	3	2	2	0.3	Trypsin-3 OS=Homo sapiens GN=PRSS3 PE=1 SV=2
777	1	UniProt_human	A0A0A0MT83	52	46621	1	1	1	1	0.09	Isovaleryl-CoA dehydrogenase, mitochondrial OS=Homo sapiens GN=IVD PE=1 SV=1
778	1	UniProt_human	H0Y8C6	52	123779	2	2	2	2	0.07	Importin-5 (Fragment) OS=Homo sapiens GN=IPO5 PE=1 SV=1
779	1	UniProt_human	H0YHD0	52	25070	1	1	1	1	0.18	Breast cancer metastasis-suppressor 1-like protein (Fragment) OS=Homo sapiens GN=BRMS1L PE=1 SV=1
780	1	UniProt_human	H0Y9D6	52	9196	1	1	1	1	0.56	Beta-1,4-galactosyltransferase 7 (Fragment) OS=Homo sapiens GN=B4GALT7 PE=1 SV=1
781	1	UniProt_human	H7C4H6	52	22272	2	2	2	2	0.45	F-box only protein 9 (Fragment) OS=Homo sapiens GN=FBXO9 PE=1 SV=8
782	1	UniProt_human	A0A0A0MRT6	52	51738	3	3	2	2	0.18	Abl interactor 1 OS=Homo sapiens GN=ABI1 PE=1 SV=1
783	1	UniProt_human	A0A087WX59	52	37481	3	3	2	2	0.25	Proteasomal ubiquitin receptor ADRM1 OS=Homo sapiens GN=ADRM1 PE=1 SV=1
784	1	UniProt_human	Q08188	52	76584	1	1	1	1	0.06	Protein-glutamine gamma-glutamyltransferase E OS=Homo sapiens GN=TGM3 PE=1 SV=4
785	1	UniProt_human	P62805	51	11360	2	2	1	1	0.44	Histone H4 OS=Homo sapiens GN=HIST1H4A PE=1 SV=2
786	1	UniProt_human	H0Y6Y4	51	25430	1	1	1	1	0.18	Ubiquitin carboxyl-terminal hydrolase isozyme L5 (Fragment) OS=Homo sapiens GN=UCHL5 PE=1 SV=1
787	1	UniProt_human	P11801	51	48005	2	2	1	1	0.09	Serine/threonine-protein kinase H1 OS=Homo sapiens GN=PSKH1 PE=1 SV=4
788	1	UniProt_human	G5E9V6	51	44470	1	1	1	1	0.1	Armadillo repeat containing 8, isoform CRA_e OS=Homo sapiens GN=ARMC8 PE=1 SV=1
789	1	UniProt_human	Q5VVL7	51	36215	1	1	1	1	0.12	Dihydrolipoamide acetyltransferase component of pyruvate dehydrogenase complex OS=Homo sapiens GN=DBT PE=1 SV=1
790	1	UniProt_human	Q9Y6M4	51	51356	2	2	2	2	0.18	Casein kinase I isoform gamma-3 OS=Homo sapiens GN=CSNK1G3 PE=1 SV=2
520	2	UniProt_human	A0A075B6N8	50	41300	5	5	2	2	0.23	Ig gamma-3 chain C region (Fragment) OS=Homo sapiens GN=IGHG3 PE=1 SV=1
791	1	UniProt_human	Q8N122	50	148942	1	1	1	1	0.03	Regulatory-associated protein of mTOR OS=Homo sapiens GN=RPTOR PE=1 SV=1
792	1	UniProt_human	O43929	50	50345	1	1	1	1	0.09	Origin recognition complex subunit 4 OS=Homo sapiens GN=ORC4 PE=1 SV=2
793	1	UniProt_human	Q96PE2	50	221535	1	1	1	1	0.02	Rho guanine nucleotide exchange factor 17 OS=Homo sapiens GN=ARHGEF17 PE=1 SV=1
794	1	UniProt_human	Q9NQH7	50	56997	1	1	1	1	0.08	Probable Xaa-Pro aminopeptidase 3 OS=Homo sapiens GN=XPNPEP3 PE=1 SV=1
795	1	UniProt_human	A0A0A0MRQ5	50	10670	1	1	1	1	0.47	Peroxiredoxin-1 OS=Homo sapiens GN=PRDX1 PE=1 SV=1
796	1	UniProt_human	H0Y4N1	49	45647	2	2	2	2	0.2	Succinate--hydroxymethylglutarate CoA-transferase (Fragment) OS=Homo sapiens GN=SUGCT PE=1 SV=1
797	1	UniProt_human	H0YNQ5	49	16583	1	1	1	1	0.29	Transcription factor 12 (Fragment) OS=Homo sapiens GN=TCF12 PE=1 SV=1
798	1	UniProt_human	G3V2A2	49	9706	2	2	1	1	0.53	NF-kappa-B inhibitor alpha OS=Homo sapiens GN=NFKBIA PE=1 SV=1
799	1	UniProt_human	Q9BRR6	49	54055	2	2	2	2	0.17	ADP-dependent glucokinase OS=Homo sapiens GN=ADPGK PE=1 SV=1
800	1	UniProt_human	H0YHX9	49	22930	1	1	1	1	0.2	Nascent polypeptide-associated complex subunit alpha (Fragment) OS=Homo sapiens GN=NACA PE=1 SV=1
801	1	UniProt_human	H3BQI7	49	12102	2	2	1	1	0.41	Inactive hydroxysteroid dehydrogenase-like protein 1 (Fragment) OS=Homo sapiens GN=HSDL1 PE=1 SV=1
802	1	UniProt_human	F8VNX8	49	32423	1	1	1	1	0.14	TRAF-type zinc finger domain-containing protein 1 (Fragment) OS=Homo sapiens GN=TRAFD1 PE=1 SV=1
803	1	UniProt_human	A0A087WUD1	49	40403	1	1	1	1	0.11	Zinc finger protein 787 OS=Homo sapiens GN=ZNF787 PE=1 SV=1
804	1	UniProt_human	Q99961-2	49	36281	1	1	1	1	0.12	Isoform 2 of Endophilin-A2 OS=Homo sapiens GN=SH3GL1
805	1	UniProt_human	C9IYA4	49	33484	2	2	2	2	0.29	Uncharacterized protein C14orf80 (Fragment) OS=Homo sapiens GN=C14orf80 PE=1 SV=8
806	1	UniProt_human	C9JVK8	49	25049	1	1	1	1	0.18	5-azacytidine-induced protein 2 (Fragment) OS=Homo sapiens GN=AZI2 PE=1 SV=1
807	1	UniProt_human	P06702	49	13234	2	2	1	1	0.37	Protein S100-A9 OS=Homo sapiens GN=S100A9 PE=1 SV=1
808	1	UniProt_human	A0A087X060	49	26303	2	2	2	2	0.38	E2F-associated phosphoprotein OS=Homo sapiens GN=EAPP PE=1 SV=1
809	1	UniProt_human	C9IZL5	49	35721	1	1	1	1	0.13	AP-4 complex subunit mu-1 OS=Homo sapiens GN=AP4M1 PE=1 SV=1
810	1	UniProt_human	Q9H814	49	44375	1	1	1	1	0.1	Phosphorylated adapter RNA export protein OS=Homo sapiens GN=PHAX PE=1 SV=1
811	1	UniProt_human	A0A087X1I3	48	56627	1	1	1	1	0.08	Succinate dehydrogenase [ubiquinone] flavoprotein subunit, mitochondrial OS=Homo sapiens GN=SDHA PE=1 SV=1
812	1	UniProt_human	F6UXX1	48	20244	1	1	1	1	0.23	Heterogeneous nuclear ribonucleoprotein Q (Fragment) OS=Homo sapiens GN=SYNCRIP PE=1 SV=1
813	1	UniProt_human	H0YDQ8	48	51166	1	1	1	1	0.09	CREB-regulated transcription coactivator 2 (Fragment) OS=Homo sapiens GN=CRTC2 PE=1 SV=2
814	1	UniProt_human	P53597	48	36227	2	2	2	2	0.26	Succinate--CoA ligase [ADP/GDP-forming] subunit alpha, mitochondrial OS=Homo sapiens GN=SUCLG1 PE=1 SV=4
815	1	UniProt_human	H0YMP3	48	31161	1	1	1	1	0.14	G2/mitotic-specific cyclin-B2 OS=Homo sapiens GN=CCNB2 PE=1 SV=1
816	1	UniProt_human	H7C4W3	48	21525	1	1	1	1	0.21	Synaptophysin (Fragment) OS=Homo sapiens GN=SYP PE=1 SV=1
817	1	UniProt_human	A0A0C4DH60	48	22572	1	1	1	1	0.2	Serine/threonine-protein kinase 33 (Fragment) OS=Homo sapiens GN=STK33 PE=1 SV=1
818	1	UniProt_human	Q5H9P2	47	29683	1	1	1	1	0.15	Gap junction protein (Fragment) OS=Homo sapiens GN=DKFZp686P0738 PE=1 SV=1
819	1	UniProt_human	D6R8Y9	47	17184	1	1	1	1	0.27	Zinc finger protein 330 (Fragment) OS=Homo sapiens GN=ZNF330 PE=1 SV=1
820	1	UniProt_human	Q9H1A4	47	216361	1	1	1	1	0.02	Anaphase-promoting complex subunit 1 OS=Homo sapiens GN=ANAPC1 PE=1 SV=1
821	1	UniProt_human	Q9ULL8	47	164754	4	4	1	1	0.03	Protein Shroom4 OS=Homo sapiens GN=SHROOM4 PE=1 SV=3
822	1	UniProt_human	Q9Y5R4	47	38207	1	1	1	1	0.12	HemK methyltransferase family member 1 OS=Homo sapiens GN=HEMK1 PE=1 SV=1
823	1	UniProt_human	D6R937	47	16568	1	1	1	1	0.29	Aminoacyl tRNA synthase complex-interacting multifunctional protein 1 (Fragment) OS=Homo sapiens GN=AIMP1 PE=1 SV=1
824	1	UniProt_human	P00742	47	54697	1	1	1	1	0.08	Coagulation factor X OS=Homo sapiens GN=F10 PE=1 SV=2
825	1	UniProt_human	Q9H7L9	47	38112	1	1	1	1	0.12	Sin3 histone deacetylase corepressor complex component SDS3 OS=Homo sapiens GN=SUDS3 PE=1 SV=2
826	1	UniProt_human	Q99704	47	52359	1	1	1	1	0.08	Docking protein 1 OS=Homo sapiens GN=DOK1 PE=1 SV=1
827	1	UniProt_human	Q6UW02	47	52399	1	1	1	1	0.08	Cytochrome P450 20A1 OS=Homo sapiens GN=CYP20A1 PE=1 SV=1
828	1	UniProt_human	D3YTB1	47	15607	2	2	1	1	0.3	60S ribosomal protein L32 (Fragment) OS=Homo sapiens GN=RPL32 PE=1 SV=1
829	1	UniProt_human	F2Z393	47	35306	1	1	1	1	0.13	Transaldolase OS=Homo sapiens GN=TALDO1 PE=1 SV=1
830	1	UniProt_human	E9PMA0	46	29919	1	1	1	1	0.15	Apoptosis-inducing factor 1, mitochondrial OS=Homo sapiens GN=AIFM1 PE=1 SV=1
831	1	UniProt_human	Q8NC54	46	29217	1	1	1	1	0.15	Keratinocyte-associated transmembrane protein 2 OS=Homo sapiens GN=KCT2 PE=1 SV=2
832	1	UniProt_human	A0A087X138	46	34756	1	1	1	1	0.13	Monocarboxylate transporter 10 OS=Homo sapiens GN=SLC16A10 PE=1 SV=1
833	1	UniProt_human	G5E9Y7	46	42570	1	1	1	1	0.1	LIM domain binding 2, isoform CRA_b OS=Homo sapiens GN=LDB2 PE=1 SV=1
834	1	UniProt_human	P15104	46	42037	1	1	1	1	0.11	Glutamine synthetase OS=Homo sapiens GN=GLUL PE=1 SV=4
835	1	UniProt_human	Q9NVA4	46	50109	1	1	1	1	0.09	Transmembrane protein 184C OS=Homo sapiens GN=TMEM184C PE=1 SV=2
836	1	UniProt_human	Q9NZ01	46	36011	2	2	1	1	0.12	Very-long-chain enoyl-CoA reductase OS=Homo sapiens GN=TECR PE=1 SV=1
837	1	UniProt_human	Q6PID8	46	49067	1	1	1	1	0.09	Kelch domain-containing protein 10 OS=Homo sapiens GN=KLHDC10 PE=1 SV=1
838	1	UniProt_human	H0Y4R1	46	51036	1	1	1	1	0.09	Inosine-5'-monophosphate dehydrogenase 2 (Fragment) OS=Homo sapiens GN=IMPDH2 PE=1 SV=1
839	1	UniProt_human	A0A087WU53	46	41504	1	1	1	1	0.11	Magnesium transporter protein 1 OS=Homo sapiens GN=MAGT1 PE=1 SV=1
840	1	UniProt_human	A2A2G4	45	58309	2	2	1	1	0.08	Dolichyl pyrophosphate Man9GlcNAc2 alpha-1,3-glucosyltransferase OS=Homo sapiens GN=ALG6 PE=1 SV=1
841	1	UniProt_human	C9J975	45	36868	1	1	1	1	0.12	Arf-GAP with GTPase, ANK repeat and PH domain-containing protein 3 OS=Homo sapiens GN=AGAP3 PE=1 SV=1
842	1	UniProt_human	P01137	45	44313	1	1	1	1	0.1	Transforming growth factor beta-1 OS=Homo sapiens GN=TGFB1 PE=1 SV=2
843	1	UniProt_human	H0YJ50	45	26677	1	1	1	1	0.17	Serine/threonine-protein kinase VRK1 (Fragment) OS=Homo sapiens GN=VRK1 PE=1 SV=1
844	1	UniProt_human	I3L1G1	45	28219	1	1	1	1	0.16	TOM1-like protein 1 (Fragment) OS=Homo sapiens GN=TOM1L1 PE=1 SV=1
845	1	UniProt_human	P08581	45	155441	2	2	2	2	0.06	Hepatocyte growth factor receptor OS=Homo sapiens GN=MET PE=1 SV=4
846	1	UniProt_human	Q12834	45	54689	1	1	1	1	0.08	Cell division cycle protein 20 homolog OS=Homo sapiens GN=CDC20 PE=1 SV=2
847	1	UniProt_human	P20930	45	434922	1	1	1	1	0.01	Filaggrin OS=Homo sapiens GN=FLG PE=1 SV=3
848	1	UniProt_human	Q86YM6	45	20807	1	1	1	1	0.22	HOMER1F OS=Homo sapiens GN=HOMER1 PE=1 SV=1
849	1	UniProt_human	Q6AI12	45	41063	1	1	1	1	0.11	Ankyrin repeat domain-containing protein 40 OS=Homo sapiens GN=ANKRD40 PE=1 SV=2
850	1	UniProt_human	P36542	44	32975	2	2	2	2	0.29	ATP synthase subunit gamma, mitochondrial OS=Homo sapiens GN=ATP5C1 PE=1 SV=1
851	1	UniProt_human	K7EJA5	44	19951	1	1	1	1	0.23	Cysteine protease ATG4D (Fragment) OS=Homo sapiens GN=ATG4D PE=1 SV=1
852	1	UniProt_human	F5H2F4	44	110544	1	1	1	1	0.04	C-1-tetrahydrofolate synthase, cytoplasmic OS=Homo sapiens GN=MTHFD1 PE=1 SV=1
853	1	UniProt_human	Q96P63	44	46247	2	2	2	2	0.2	Serpin B12 OS=Homo sapiens GN=SERPINB12 PE=1 SV=1
854	1	UniProt_human	A0A087WT84	44	47395	1	1	1	1	0.09	JmjC domain-containing protein 4 OS=Homo sapiens GN=JMJD4 PE=1 SV=1
855	1	UniProt_human	A0A075B6Z2	44	2220	6	6	1	1	4.07	Protein TRAJ56 (Fragment) OS=Homo sapiens GN=TRAJ56 PE=4 SV=1
856	1	UniProt_human	H0Y698	44	8426	1	1	1	1	0.62	Acyl-coenzyme A thioesterase 8 (Fragment) OS=Homo sapiens GN=ACOT8 PE=1 SV=1
857	1	UniProt_human	C9J8I8	44	23959	1	1	1	1	0.19	Protein Wnt (Fragment) OS=Homo sapiens GN=WNT5A PE=1 SV=1
858	1	UniProt_human	C9JYX9	44	33785	1	1	1	1	0.13	Procollagen C-endopeptidase enhancer 2 OS=Homo sapiens GN=PCOLCE2 PE=1 SV=1
859	1	UniProt_human	E7EMB6	44	44964	1	1	1	1	0.1	Aspartyl aminopeptidase OS=Homo sapiens GN=DNPEP PE=1 SV=2
860	1	UniProt_human	M0QY76	44	34718	1	1	1	1	0.13	Tristetraprolin OS=Homo sapiens GN=ZFP36 PE=1 SV=1
861	1	UniProt_human	A0A0A0MT00	44	19943	1	1	1	1	0.23	Nuclear transcription factor Y subunit gamma (Fragment) OS=Homo sapiens GN=NFYC PE=1 SV=6
862	1	UniProt_human	M0QX71	43	25461	1	1	1	1	0.18	Glutamate-rich WD repeat-containing protein 1 (Fragment) OS=Homo sapiens GN=GRWD1 PE=1 SV=1
863	1	UniProt_human	Q96QR8	43	33220	1	1	1	1	0.14	Transcriptional activator protein Pur-beta OS=Homo sapiens GN=PURB PE=1 SV=3
864	1	UniProt_human	P57081	43	45461	1	1	1	1	0.1	tRNA (guanine-N(7)-)-methyltransferase non-catalytic subunit WDR4 OS=Homo sapiens GN=WDR4 PE=1 SV=2
865	1	UniProt_human	H3BRD9	43	15917	1	1	1	1	0.3	Nuclear pore complex protein Nup93 (Fragment) OS=Homo sapiens GN=NUP93 PE=1 SV=1
866	1	UniProt_human	H3BPG7	43	26078	1	1	1	1	0.17	Anamorsin OS=Homo sapiens GN=CIAPIN1 PE=1 SV=1
867	1	UniProt_human	P47914	43	17741	1	1	1	1	0.26	60S ribosomal protein L29 OS=Homo sapiens GN=RPL29 PE=1 SV=2
868	1	UniProt_human	H7C4J2	43	9425	1	1	1	1	0.54	Sugar phosphate exchanger 3 (Fragment) OS=Homo sapiens GN=SLC37A3 PE=1 SV=1
869	1	UniProt_human	I3L1R7	43	41370	1	1	1	1	0.11	Ethanolamine-phosphate cytidylyltransferase OS=Homo sapiens GN=PCYT2 PE=1 SV=1
870	1	UniProt_human	Q8NAV1	43	37453	1	1	1	1	0.12	Pre-mRNA-splicing factor 38A OS=Homo sapiens GN=PRPF38A PE=1 SV=1
871	1	UniProt_human	E5RIF2	43	145514	1	1	1	1	0.03	Brefeldin A-inhibited guanine nucleotide-exchange protein 1 (Fragment) OS=Homo sapiens GN=ARFGEF1 PE=1 SV=2
872	1	UniProt_human	O75173	43	90139	1	1	1	1	0.05	A disintegrin and metalloproteinase with thrombospondin motifs 4 OS=Homo sapiens GN=ADAMTS4 PE=1 SV=3
873	1	UniProt_human	H3BLX4	43	165584	1	1	1	1		Zinc finger protein 462 (Fragment) OS=Homo sapiens GN=ZNF462 PE=1 SV=1
874	1	UniProt_human	Q86UQ0	43	41163	1	1	1	1	0.11	Zinc finger protein 589 OS=Homo sapiens GN=ZNF589 PE=1 SV=1
875	1	UniProt_human	Q5VUV5	43	45433	1	1	1	1	0.1	Acidic mammalian chitinase (Fragment) OS=Homo sapiens GN=CHIA PE=1 SV=1
876	1	UniProt_human	A4D1U4	43	51413	1	1	1	1	0.09	Protein LCHN OS=Homo sapiens GN=LCHN PE=2 SV=1
877	1	UniProt_human	F6Y5H0	43	41939	1	1	1	1	0.11	RNA-binding motif, single-stranded-interacting protein 1 OS=Homo sapiens GN=RBMS1 PE=1 SV=1
878	1	UniProt_human	D6RA32	42	74980	1	1	1	1	0.06	Microtubule-associated protein 1B (Fragment) OS=Homo sapiens GN=MAP1B PE=1 SV=2
879	1	UniProt_human	Q8IVM0	42	35800	1	1	1	1	0.12	Coiled-coil domain-containing protein 50 OS=Homo sapiens GN=CCDC50 PE=1 SV=1
880	1	UniProt_human	H3BS02	42	24433	1	1	1	1	0.19	[3-methyl-2-oxobutanoate dehydrogenase [lipoamide]] kinase, mitochondrial OS=Homo sapiens GN=BCKDK PE=1 SV=1
881	1	UniProt_human	I3L1H5	42	47394	1	1	1	1	0.09	Diphthamide biosynthesis protein 1 (Fragment) OS=Homo sapiens GN=DPH1 PE=1 SV=1
882	1	UniProt_human	E5RGR9	42	11246	2	2	1	1	0.44	Protein YIPF5 (Fragment) OS=Homo sapiens GN=YIPF5 PE=1 SV=1
883	1	UniProt_human	Q5JXC2	42	42798	1	1	1	1	0.1	Migration and invasion-inhibitory protein OS=Homo sapiens GN=MIIP PE=1 SV=3
884	1	UniProt_human	F5H6E7	41	4986	1	1	1	1	1.2	Putative cytochrome P450 2D7 (Fragment) OS=Homo sapiens GN=CYP2D7 PE=4 SV=2
885	1	UniProt_human	P40227	41	57988	1	1	1	1	0.08	T-complex protein 1 subunit zeta OS=Homo sapiens GN=CCT6A PE=1 SV=3
886	1	UniProt_human	Q9BRR3	41	46558	1	1	1	1	0.1	Transmembrane protein 246 OS=Homo sapiens GN=TMEM246 PE=1 SV=1
887	1	UniProt_human	P62701	41	29579	1	1	1	1	0.15	40S ribosomal protein S4, X isoform OS=Homo sapiens GN=RPS4X PE=1 SV=2
888	1	UniProt_human	O75683	41	41426	1	1	1	1	0.11	Surfeit locus protein 6 OS=Homo sapiens GN=SURF6 PE=1 SV=3
889	1	UniProt_human	F8VTY2	41	23251	2	2	1	1	0.2	Nucleoporin Nup37 (Fragment) OS=Homo sapiens GN=NUP37 PE=1 SV=8
890	1	UniProt_human	P48637	41	52352	1	1	1	1	0.08	Glutathione synthetase OS=Homo sapiens GN=GSS PE=1 SV=1
891	1	UniProt_human	F8WE04	40	20394	1	1	1	1	0.23	Heat shock protein beta-1 OS=Homo sapiens GN=HSPB1 PE=1 SV=1
892	1	UniProt_human	Q9UL42	40	41483	1	1	1	1	0.11	Paraneoplastic antigen Ma2 OS=Homo sapiens GN=PNMA2 PE=1 SV=2
893	1	UniProt_human	J3KNB8	40	176455	1	1	1	1	0.02	Mitogen-activated protein kinase kinase kinase 4 OS=Homo sapiens GN=MAP3K4 PE=1 SV=1
894	1	UniProt_human	A0A096LNY6	40	40911	1	1	1	1	0.11	Adenylosuccinate lyase (Fragment) OS=Homo sapiens GN=ADSL PE=1 SV=1
895	1	UniProt_human	Q9NS86	40	50821	1	1	1	1	0.09	LanC-like protein 2 OS=Homo sapiens GN=LANCL2 PE=1 SV=1
896	1	UniProt_human	Q92747	40	41543	1	1	1	1	0.11	Actin-related protein 2/3 complex subunit 1A OS=Homo sapiens GN=ARPC1A PE=1 SV=2
897	1	UniProt_human	K7ENG2	40	33880	1	1	1	1	0.13	Splicing factor U2AF 65 kDa subunit OS=Homo sapiens GN=U2AF2 PE=1 SV=1
898	1	UniProt_human	P05423	39	44368	2	2	1	1	0.1	DNA-directed RNA polymerase III subunit RPC4 OS=Homo sapiens GN=POLR3D PE=1 SV=2
899	1	UniProt_human	A0A0C4DGV3	39	28238	1	1	1	1	0.16	NAD kinase 2, mitochondrial OS=Homo sapiens GN=NADK2 PE=1 SV=1
900	1	UniProt_human	O75419	39	65527	1	1	1	1	0.07	Cell division control protein 45 homolog OS=Homo sapiens GN=CDC45 PE=1 SV=1
901	1	UniProt_human	Q5TBP9	39	26699	1	1	1	1	0.17	Protein LSM14 homolog B (Fragment) OS=Homo sapiens GN=LSM14B PE=1 SV=1
902	1	UniProt_human	P05089	39	34713	1	1	1	1	0.13	Arginase-1 OS=Homo sapiens GN=ARG1 PE=1 SV=2
903	1	UniProt_human	X6RFN3	39	27260	1	1	1	1	0.17	E3 ubiquitin-protein ligase RING2 (Fragment) OS=Homo sapiens GN=RNF2 PE=1 SV=2
904	1	UniProt_human	O94874	39	89540	1	1	1	1	0.05	E3 UFM1-protein ligase 1 OS=Homo sapiens GN=UFL1 PE=1 SV=2
905	1	UniProt_human	H0YHF8	39	10706	1	1	1	1	0.47	5'-AMP-activated protein kinase subunit gamma-1 (Fragment) OS=Homo sapiens GN=PRKAG1 PE=1 SV=1
906	1	UniProt_human	P54886	39	87248	1	1	1	1	0.05	Delta-1-pyrroline-5-carboxylate synthase OS=Homo sapiens GN=ALDH18A1 PE=1 SV=2
907	1	UniProt_human	O15379	39	48816	2	2	1	1	0.09	Histone deacetylase 3 OS=Homo sapiens GN=HDAC3 PE=1 SV=2
908	1	UniProt_human	Q06609	38	36943	1	1	1	1	0.12	DNA repair protein RAD51 homolog 1 OS=Homo sapiens GN=RAD51 PE=1 SV=1
909	1	UniProt_human	C9JJV1	38	21895	1	1	1	1	0.21	Protein TSSC4 (Fragment) OS=Homo sapiens GN=TSSC4 PE=1 SV=8
910	1	UniProt_human	Q8TBB7	38	36567	1	1	1	1	0.12	DDB1- and CUL4-associated factor 5 OS=Homo sapiens GN=WDR22 PE=1 SV=1
912	1	UniProt_human	Q8N1F8	38	121325	1	1	1	1	0.04	Serine/threonine-protein kinase 11-interacting protein OS=Homo sapiens GN=STK11IP PE=1 SV=3
913	1	UniProt_human	J3KQ69	38	91872	1	1	1	1	0.05	DNA replication licensing factor MCM3 OS=Homo sapiens GN=MCM3 PE=1 SV=2
914	1	UniProt_human	Q3B7J2	38	42227	1	1	1	1	0.11	Glucose-fructose oxidoreductase domain-containing protein 2 OS=Homo sapiens GN=GFOD2 PE=2 SV=1
915	1	UniProt_human	Q5T8V1	38	27791	1	1	1	1	0.16	Carnosine N-methyltransferase (Fragment) OS=Homo sapiens GN=CARNMT1 PE=1 SV=1
916	1	UniProt_human	Q13595	38	32669	1	1	1	1	0.14	Transformer-2 protein homolog alpha OS=Homo sapiens GN=TRA2A PE=1 SV=1
917	1	UniProt_human	O75953	37	39109	2	2	2	2	0.24	DnaJ homolog subfamily B member 5 OS=Homo sapiens GN=DNAJB5 PE=1 SV=1
918	1	UniProt_human	P52799	37	36900	1	1	1	1	0.12	Ephrin-B2 OS=Homo sapiens GN=EFNB2 PE=1 SV=1
919	1	UniProt_human	Q8IWI9	37	331631	2	2	1	1	0.01	MAX gene-associated protein OS=Homo sapiens GN=MGA PE=1 SV=3
920	1	UniProt_human	Q8TEK3	37	184740	1	1	1	1	0.02	Histone-lysine N-methyltransferase, H3 lysine-79 specific OS=Homo sapiens GN=DOT1L PE=1 SV=2
921	1	UniProt_human	P38432	37	62570	1	1	1	1	0.07	Coilin OS=Homo sapiens GN=COIL PE=1 SV=1
922	1	UniProt_human	A0A087X0Z7	37	42592	1	1	1	1	0.1	Dehydrogenase/reductase SDR family member 7 OS=Homo sapiens GN=DHRS7 PE=1 SV=1
923	1	UniProt_human	P49189	37	53767	1	1	1	1	0.08	4-trimethylaminobutyraldehyde dehydrogenase OS=Homo sapiens GN=ALDH9A1 PE=1 SV=3
911	1	UniProt_human	Q96I59	36	54056	2	2	2	2	0.17	Probable asparagine--tRNA ligase, mitochondrial OS=Homo sapiens GN=NARS2 PE=1 SV=3
924	1	UniProt_human	H3BPE7	36	53465	1	1	1	1	0.08	RNA-binding protein FUS OS=Homo sapiens GN=FUS PE=1 SV=1
925	1	UniProt_human	Q08380	36	65289	1	1	1	1	0.07	Galectin-3-binding protein OS=Homo sapiens GN=LGALS3BP PE=1 SV=1
926	1	UniProt_human	O76031	36	69181	2	2	2	2	0.13	ATP-dependent Clp protease ATP-binding subunit clpX-like, mitochondrial OS=Homo sapiens GN=CLPX PE=1 SV=2
927	1	UniProt_human	H0YC97	36	25825	1	1	1	1	0.18	Pumilio homolog 1 (Fragment) OS=Homo sapiens GN=PUM1 PE=1 SV=1
928	1	UniProt_human	U3KQU2	36	16364	1	1	1	1	0.29	Putative methyltransferase NSUN6 (Fragment) OS=Homo sapiens GN=NSUN6 PE=1 SV=2
929	1	UniProt_human	A0AVF1	36	64136	1	1	1	1	0.07	Intraflagellar transport protein 56 OS=Homo sapiens GN=TTC26 PE=2 SV=1
930	1	UniProt_human	J3KN87	36	48988	1	1	1	1	0.09	Serine/threonine-protein kinase Chk1 OS=Homo sapiens GN=CHEK1 PE=1 SV=1
931	1	UniProt_human	H0Y9T5	36	44845	2	2	2	2	0.21	m7GpppN-mRNA hydrolase (Fragment) OS=Homo sapiens GN=DCP2 PE=1 SV=2
932	1	UniProt_human	B7WP89	36	43326	1	1	1	1	0.1	Protein ABHD18 OS=Homo sapiens GN=ABHD18 PE=1 SV=1
933	1	UniProt_human	P26373	35	24247	1	1	1	1	0.19	60S ribosomal protein L13 OS=Homo sapiens GN=RPL13 PE=1 SV=4
934	1	UniProt_human	F6R0L0	35	98918	1	1	1	1	0.04	SUMO-interacting motif-containing protein 1 OS=Homo sapiens GN=SIMC1 PE=1 SV=1
935	1	UniProt_human	Q93063	35	82202	1	1	1	1	0.05	Exostosin-2 OS=Homo sapiens GN=EXT2 PE=1 SV=1
936	1	UniProt_human	A0A0A0MRX2	34	33919	1	1	1	1	0.13	DDRGK domain-containing protein 1 OS=Homo sapiens GN=DDRGK1 PE=1 SV=1
937	1	UniProt_human	Q96IZ0	34	36545	1	1	1	1	0.12	PRKC apoptosis WT1 regulator protein OS=Homo sapiens GN=PAWR PE=1 SV=1
938	1	UniProt_human	Q96S53	34	63599	1	1	1	1	0.07	Dual specificity testis-specific protein kinase 2 OS=Homo sapiens GN=TESK2 PE=1 SV=1
939	1	UniProt_human	O95159	33	34092	1	1	1	1	0.13	Zinc finger protein-like 1 OS=Homo sapiens GN=ZFPL1 PE=1 SV=2
940	1	UniProt_human	Q86YV9	33	82923	1	1	1	1	0.05	Hermansky-Pudlak syndrome 6 protein OS=Homo sapiens GN=HPS6 PE=1 SV=1
941	1	UniProt_human	A0A0A0MRR5	33	30747	1	1	1	1	0.15	Uncharacterized protein OS=Homo sapiens GN=UPRT PE=1 SV=1
942	1	UniProt_human	A0A087WU33	33	51157	1	1	1	1	0.09	SRC kinase-signaling inhibitor 1 (Fragment) OS=Homo sapiens GN=SRCIN1 PE=1 SV=6
943	1	UniProt_human	A0A0J9YVP6	33	57362	1	1	1	1	0.08	Poly(U)-binding-splicing factor PUF60 (Fragment) OS=Homo sapiens GN=PUF60 PE=1 SV=1
944	1	UniProt_human	B4DUR8	32	55639	1	1	1	1	0.08	T-complex protein 1 subunit gamma OS=Homo sapiens GN=CCT3 PE=1 SV=1
945	1	UniProt_human	Q96DP5	32	43804	1	1	1	1	0.1	Methionyl-tRNA formyltransferase, mitochondrial OS=Homo sapiens GN=MTFMT PE=1 SV=2
946	1	UniProt_human	F8W1T6	32	37163	1	1	1	1	0.12	RNA-binding motif, single-stranded-interacting protein 2 OS=Homo sapiens GN=RBMS2 PE=1 SV=1
947	1	UniProt_human	Q8NCD3	32	83487	1	1	1	1	0.05	Holliday junction recognition protein OS=Homo sapiens GN=HJURP PE=1 SV=2
948	1	UniProt_human	O76003	32	37408	1	1	1	1	0.12	Glutaredoxin-3 OS=Homo sapiens GN=GLRX3 PE=1 SV=2
949	1	UniProt_human	E2J9M0	31	24848	1	1	1	1	0.18	Truncated protein tyrosine phosphatase non-receptor type 14 OS=Homo sapiens GN=PTPN14 PE=1 SV=1
950	1	UniProt_human	F2Z388	30	10638	1	1	1	1	0.47	60S ribosomal protein L35 OS=Homo sapiens GN=RPL35 PE=1 SV=1
951	1	UniProt_human	Q7Z5U6	30	38965	1	1	1	1	0.11	WD repeat-containing protein 53 OS=Homo sapiens GN=WDR53 PE=2 SV=1
952	1	UniProt_human	P53004	30	33407	1	1	1	1	0.13	Biliverdin reductase A OS=Homo sapiens GN=BLVRA PE=1 SV=2
953	1	UniProt_human	H0YI10	29	30499	1	1	1	1	0.15	Ceramide synthase 5 (Fragment) OS=Homo sapiens GN=CERS5 PE=1 SV=2
954	1	UniProt_human	M0QXL5	29	26623	1	1	1	1	0.17	rRNA 2'-O-methyltransferase fibrillarin (Fragment) OS=Homo sapiens GN=FBL PE=1 SV=1
955	1	UniProt_human	Q9BZH6	29	136598	1	1	1	1	0.03	WD repeat-containing protein 11 OS=Homo sapiens GN=WDR11 PE=1 SV=1
956	1	UniProt_human	Q53EL6	28	51703	1	1	1	1	0.09	Programmed cell death protein 4 OS=Homo sapiens GN=PDCD4 PE=1 SV=2
