# Supplementary material for: FER-mediated phosphorylation and PIK3R2 recruitment on IRS4 promotes AKT activation and tumorigenesis in ovarian cancer cells
Source: eLife. 2022 May 12;11:e76183. doi: 10.7554/eLife.76183 (PMC9098222; doi:10.7554/eLife.76183)
Supplement: Supplementary file 3. — Potential FER interactome between 50– and 75 kDa is shown in this file. [file elife-76183-supp3.xlsx]

## Sheet: Chris_50_75_results
Database	UniProt_human 20161004
Type of search	MS/MS Ion Search
Enzyme	Trypsin
Variable modifications	Deamidated (NQ),Oxidation (M),Phospho (ST),Phospho (Y)
Mass values	Monoisotopic
Protein mass	Unrestricted
Peptide mass tolerance	30 ppm
Fragment mass tolerance	0.3 Da
Max missed cleavages	1
Instrument type	ESI-QUAD
Number of queries	51328
Significance threshold p<	0.007001
Max. number of families	AUTO
Ions score or expect cut-off	0.007001
Preferred taxonomy	All entries
Show Percolator scores?	no
Family	Member	Database	Accession	Score	Mass	Num. of matches	Num. of significant matches	Num. of sequences	Num. of significant sequences	emPAI	Description
1	1	UniProt_human	P11142	9118	70854	371	371	36	36	22.85	Heat shock cognate 71 kDa protein OS=Homo sapiens GN=HSPA8 PE=1 SV=1
1	2	UniProt_human	P38646	8850	73635	280	280	37	37	13.99	Stress-70 protein, mitochondrial OS=Homo sapiens GN=HSPA9 PE=1 SV=2
1	3	UniProt_human	A0A0G2JIW1	8149	70066	311	311	34	34	17.25	Heat shock 70 kDa protein 1B OS=Homo sapiens GN=HSPA1B PE=1 SV=1
2	1	UniProt_human	P35908	7060	65393	193	193	40	40	20.01	Keratin, type II cytoskeletal 2 epidermal OS=Homo sapiens GN=KRT2 PE=1 SV=2
3	1	UniProt_human	P10809	6833	61016	211	211	40	40	26.91	60 kDa heat shock protein, mitochondrial OS=Homo sapiens GN=HSPD1 PE=1 SV=2
4	1	UniProt_human	P13645	6720	58792	205	205	30	30	26.38	Keratin, type I cytoskeletal 10 OS=Homo sapiens GN=KRT10 PE=1 SV=6
1	4	UniProt_human	P11021	6031	72288	216	216	32	32	7.76	78 kDa glucose-regulated protein OS=Homo sapiens GN=HSPA5 PE=1 SV=2
5	1	UniProt_human	A0A087X0X3	5708	77518	217	217	46	46	13.61	Heterogeneous nuclear ribonucleoprotein M OS=Homo sapiens GN=HNRNPM PE=1 SV=1
4	2	UniProt_human	P35527	5268	62027	140	140	30	30	12.37	Keratin, type I cytoskeletal 9 OS=Homo sapiens GN=KRT9 PE=1 SV=3
7	1	UniProt_human	Q9UJS0	4817	74129	183	183	31	31	6.4	Calcium-binding mitochondrial carrier protein Aralar2 OS=Homo sapiens GN=SLC25A13 PE=1 SV=2
6	1	UniProt_human	Q71U36	4794	50104	162	162	19	19	7.26	Tubulin alpha-1A chain OS=Homo sapiens GN=TUBA1A PE=1 SV=1
2	2	UniProt_human	P04264	4348	65999	152	152	35	35	18.11	Keratin, type II cytoskeletal 1 OS=Homo sapiens GN=KRT1 PE=1 SV=6
1	5	UniProt_human	P34931	4291	70331	157	157	17	17	2.99	Heat shock 70 kDa protein 1-like OS=Homo sapiens GN=HSPA1L PE=1 SV=2
6	2	UniProt_human	P68366	3776	49892	128	128	17	17	4.94	Tubulin alpha-4A chain OS=Homo sapiens GN=TUBA4A PE=1 SV=1
8	1	UniProt_human	Q5JP53	3748	47736	136	136	19	19	4.38	Tubulin beta chain OS=Homo sapiens GN=TUBB PE=1 SV=1
8	2	UniProt_human	P68371	3407	49799	122	122	18	18	3.6	Tubulin beta-4B chain OS=Homo sapiens GN=TUBB4B PE=1 SV=1
1	6	UniProt_human	P54652	3309	69978	135	135	17	17	3.28	Heat shock-related 70 kDa protein 2 OS=Homo sapiens GN=HSPA2 PE=1 SV=1
9	1	UniProt_human	P04844	3231	69241	76	76	20	20	2.4	Dolichyl-diphosphooligosaccharide--protein glycosyltransferase subunit 2 OS=Homo sapiens GN=RPN2 PE=1 SV=3
7	2	UniProt_human	O75746	3058	74715	119	119	27	27	3.63	Calcium-binding mitochondrial carrier protein Aralar1 OS=Homo sapiens GN=SLC25A12 PE=1 SV=2
5	2	UniProt_human	M0QZM1	3047	40017	129	129	27	27	18.07	Heterogeneous nuclear ribonucleoprotein M (Fragment) OS=Homo sapiens GN=HNRNPM PE=1 SV=1
8	3	UniProt_human	Q9BVA1	3045	49921	103	103	17	17	3.22	Tubulin beta-2B chain OS=Homo sapiens GN=TUBB2B PE=1 SV=1
10	1	UniProt_human	P61978-3	2973	48532	124	124	20	20	5.8	Isoform 3 of Heterogeneous nuclear ribonucleoprotein K OS=Homo sapiens GN=HNRNPK
11	1	UniProt_human	J3KNN5	2971	71603	126	126	28	28	4.25	Probable ATP-dependent RNA helicase DDX41 (Fragment) OS=Homo sapiens GN=DDX41 PE=1 SV=1
12	1	UniProt_human	Q14247	2937	61549	97	97	24	24	6.37	Src substrate cortactin OS=Homo sapiens GN=CTTN PE=1 SV=2
13	1	UniProt_human	Q15637-4	2905	59674	91	91	13	13	1.51	Isoform 4 of Splicing factor 1 OS=Homo sapiens GN=SF1
8	4	UniProt_human	A0A0B4J269	2877	88324	100	100	13	13	0.87	Uncharacterized protein OS=Homo sapiens PE=1 SV=1
14	1	UniProt_human	Q9NVI7-2	2834	66177	121	121	32	32	7.82	Isoform 2 of ATPase family AAA domain-containing protein 3A OS=Homo sapiens GN=ATAD3A
15	1	UniProt_human	Q969V3	2768	62935	89	89	22	22	3.7	Nicalin OS=Homo sapiens GN=NCLN PE=1 SV=2
16	1	UniProt_human	P17987	2702	60306	91	91	23	23	5.21	T-complex protein 1 subunit alpha OS=Homo sapiens GN=TCP1 PE=1 SV=1
17	1	UniProt_human	P11940	2665	70626	88	88	25	25	3.76	Polyadenylate-binding protein 1 OS=Homo sapiens GN=PABPC1 PE=1 SV=2
18	1	UniProt_human	Q15233	2642	54197	94	94	16	16	3.08	Non-POU domain-containing octamer-binding protein OS=Homo sapiens GN=NONO PE=1 SV=4
19	1	UniProt_human	O95831	2458	66859	83	83	25	25	4.2	Apoptosis-inducing factor 1, mitochondrial OS=Homo sapiens GN=AIFM1 PE=1 SV=1
20	1	UniProt_human	Q92734	2343	43421	79	79	12	12	3.3	Protein TFG OS=Homo sapiens GN=TFG PE=1 SV=2
21	1	UniProt_human	P12956	2199	69799	87	87	29	29	4.81	X-ray repair cross-complementing protein 6 OS=Homo sapiens GN=XRCC6 PE=1 SV=2
8	5	UniProt_human	P04350	2183	49554	98	98	16	16	2.92	Tubulin beta-4A chain OS=Homo sapiens GN=TUBB4A PE=1 SV=2
14	2	UniProt_human	Q5T9A4	2098	72527	105	105	30	30	6.74	ATPase family AAA domain-containing protein 3B OS=Homo sapiens GN=ATAD3B PE=1 SV=1
22	1	UniProt_human	Q15942	2024	61238	86	86	13	13	1.82	Zyxin OS=Homo sapiens GN=ZYX PE=1 SV=1
6	3	UniProt_human	C9J2C0	1996	51952	82	82	12	12	2.99	Tubulin alpha chain (Fragment) OS=Homo sapiens GN=TUBA8 PE=1 SV=1
23	1	UniProt_human	O60506	1923	69560	82	82	20	20	2.38	Heterogeneous nuclear ribonucleoprotein Q OS=Homo sapiens GN=SYNCRIP PE=1 SV=2
24	1	UniProt_human	P51617	1904	76489	47	47	18	18	1.71	Interleukin-1 receptor-associated kinase 1 OS=Homo sapiens GN=IRAK1 PE=1 SV=2
25	1	UniProt_human	P33993	1902	81257	70	70	27	27	3.09	DNA replication licensing factor MCM7 OS=Homo sapiens GN=MCM7 PE=1 SV=4
26	1	UniProt_human	P52292	1884	57826	51	51	14	14	1.79	Importin subunit alpha-1 OS=Homo sapiens GN=KPNA2 PE=1 SV=1
27	1	UniProt_human	O14654	1764	133685	70	70	29	29	1.51	Insulin receptor substrate 4 OS=Homo sapiens GN=IRS4 PE=1 SV=1
8	6	UniProt_human	Q9BUF5	1740	49825	68	68	11	11	1.54	Tubulin beta-6 chain OS=Homo sapiens GN=TUBB6 PE=1 SV=1
28	1	UniProt_human	Q9NZI8	1732	63441	57	57	17	17	2.55	Insulin-like growth factor 2 mRNA-binding protein 1 OS=Homo sapiens GN=IGF2BP1 PE=1 SV=2
29	1	UniProt_human	O43175	1720	56614	63	63	14	14	2.56	D-3-phosphoglycerate dehydrogenase OS=Homo sapiens GN=PHGDH PE=1 SV=4
30	1	UniProt_human	P31040	1713	72645	57	57	17	17	1.86	Succinate dehydrogenase [ubiquinone] flavoprotein subunit, mitochondrial OS=Homo sapiens GN=SDHA PE=1 SV=2
31	1	UniProt_human	O00571-2	1702	71311	73	73	24	24	3.17	Isoform 2 of ATP-dependent RNA helicase DDX3X OS=Homo sapiens GN=DDX3X
32	1	UniProt_human	O00116	1698	72866	62	62	18	18	2.2	Alkyldihydroxyacetonephosphate synthase, peroxisomal OS=Homo sapiens GN=AGPS PE=1 SV=1
33	1	UniProt_human	P49368	1669	60495	67	67	23	23	3.66	T-complex protein 1 subunit gamma OS=Homo sapiens GN=CCT3 PE=1 SV=4
34	1	UniProt_human	P30153	1631	65267	50	50	17	17	2.22	Serine/threonine-protein phosphatase 2A 65 kDa regulatory subunit A alpha isoform OS=Homo sapiens GN=PPP2R1A PE=1 SV=4
35	1	UniProt_human	Q13283	1604	52132	51	51	14	14	2.37	Ras GTPase-activating protein-binding protein 1 OS=Homo sapiens GN=G3BP1 PE=1 SV=1
2	3	UniProt_human	Q07065	1591	65983	52	52	24	24	3.67	Cytoskeleton-associated protein 4 OS=Homo sapiens GN=CKAP4 PE=1 SV=2
36	1	UniProt_human	P50990	1574	59583	65	65	24	24	4.9	T-complex protein 1 subunit theta OS=Homo sapiens GN=CCT8 PE=1 SV=4
37	1	UniProt_human	Q15758	1573	56562	51	51	9	9	0.96	Neutral amino acid transporter B(0) OS=Homo sapiens GN=SLC1A5 PE=1 SV=2
38	1	UniProt_human	A0A087WXK8	1570	67622	53	53	17	17	1.9	Chromosome 20 open reading frame 129 OS=Homo sapiens GN=FAM83D PE=1 SV=1
39	1	UniProt_human	O60942	1499	68513	61	61	20	20	2.45	mRNA-capping enzyme OS=Homo sapiens GN=RNGTT PE=1 SV=1
40	1	UniProt_human	P50991	1440	57888	60	60	22	22	4.77	T-complex protein 1 subunit delta OS=Homo sapiens GN=CCT4 PE=1 SV=4
41	1	UniProt_human	B0QY89	1433	70857	47	47	20	20	2.31	Eukaryotic translation initiation factor 3 subunit L OS=Homo sapiens GN=EIF3L PE=1 SV=1
42	1	UniProt_human	Q9UNF1	1432	64914	51	51	17	17	1.84	Melanoma-associated antigen D2 OS=Homo sapiens GN=MAGED2 PE=1 SV=2
43	1	UniProt_human	P04843	1416	68527	62	62	21	21	2.9	Dolichyl-diphosphooligosaccharide--protein glycosyltransferase subunit 1 OS=Homo sapiens GN=RPN1 PE=1 SV=1
44	1	UniProt_human	O43251-6	1395	47186	46	46	11	11	2.2	Isoform 6 of RNA binding protein fox-1 homolog 2 OS=Homo sapiens GN=RBFOX2
4	3	UniProt_human	P02533	1392	51529	43	43	15	15	3.04	Keratin, type I cytoskeletal 14 OS=Homo sapiens GN=KRT14 PE=1 SV=4
45	1	UniProt_human	P38606	1359	68260	57	57	21	21	2.68	V-type proton ATPase catalytic subunit A OS=Homo sapiens GN=ATP6V1A PE=1 SV=2
46	1	UniProt_human	P48643	1357	59633	74	74	25	25	5.8	T-complex protein 1 subunit epsilon OS=Homo sapiens GN=CCT5 PE=1 SV=1
47	1	UniProt_human	Q9Y3I0	1334	55175	62	62	19	19	3.64	tRNA-splicing ligase RtcB homolog OS=Homo sapiens GN=RTCB PE=1 SV=1
48	1	UniProt_human	P54136	1327	75331	56	56	25	25	3.32	Arginine--tRNA ligase, cytoplasmic OS=Homo sapiens GN=RARS PE=1 SV=2
49	1	UniProt_human	P18074	1317	86854	50	50	21	21	1.79	TFIIH basal transcription factor complex helicase XPD subunit OS=Homo sapiens GN=ERCC2 PE=1 SV=1
50	1	UniProt_human	Q99832	1263	59329	55	55	20	20	3.17	T-complex protein 1 subunit eta OS=Homo sapiens GN=CCT7 PE=1 SV=2
17	2	UniProt_human	B1ANR0	1259	67928	52	52	19	19	2.48	Polyadenylate-binding protein OS=Homo sapiens GN=PABPC4 PE=1 SV=1
51	1	UniProt_human	K7ER00	1254	62356	58	58	17	17	2.63	Phenylalanine--tRNA ligase alpha subunit OS=Homo sapiens GN=FARSA PE=1 SV=1
52	1	UniProt_human	Q96A33	1223	55838	53	53	14	14	1.89	Coiled-coil domain-containing protein 47 OS=Homo sapiens GN=CCDC47 PE=1 SV=1
53	1	UniProt_human	Q96TA2-2	1216	79783	51	51	22	22	2.22	Isoform 2 of ATP-dependent zinc metalloprotease YME1L1 OS=Homo sapiens GN=YME1L1
54	1	UniProt_human	B0YIW6	1208	61587	48	48	17	17	2.45	Archain 1, isoform CRA_a OS=Homo sapiens GN=ARCN1 PE=1 SV=1
55	1	UniProt_human	A0A0J9YVP6	1207	57362	50	50	19	19	3.37	Poly(U)-binding-splicing factor PUF60 (Fragment) OS=Homo sapiens GN=PUF60 PE=1 SV=1
56	1	UniProt_human	P26368	1203	53467	40	40	9	9	1.2	Splicing factor U2AF 65 kDa subunit OS=Homo sapiens GN=U2AF2 PE=1 SV=4
57	1	UniProt_human	P28331	1195	79417	48	48	21	21	2.24	NADH-ubiquinone oxidoreductase 75 kDa subunit, mitochondrial OS=Homo sapiens GN=NDUFS1 PE=1 SV=3
2	4	UniProt_human	P04259	1183	60030	60	60	17	17	3.1	Keratin, type II cytoskeletal 6B OS=Homo sapiens GN=KRT6B PE=1 SV=5
58	1	UniProt_human	Q9H078-2	1175	75402	44	44	16	16	1.46	Isoform 2 of Caseinolytic peptidase B protein homolog OS=Homo sapiens GN=CLPB
59	1	UniProt_human	Q9NPI6	1173	63270	42	42	17	17	2.12	mRNA-decapping enzyme 1A OS=Homo sapiens GN=DCP1A PE=1 SV=2
60	1	UniProt_human	Q7L8L6	1172	86519	52	52	19	19	1.54	FAST kinase domain-containing protein 5, mitochondrial OS=Homo sapiens GN=FASTKD5 PE=1 SV=1
9	2	UniProt_human	Q5JYR7	1152	37086	28	28	9	9	1.78	Dolichyl-diphosphooligosaccharide--protein glycosyltransferase subunit 2 (Fragment) OS=Homo sapiens GN=RPN2 PE=1 SV=8
61	1	UniProt_human	O75027	1144	82589	37	37	17	17	1.39	ATP-binding cassette sub-family B member 7, mitochondrial OS=Homo sapiens GN=ABCB7 PE=1 SV=2
17	3	UniProt_human	H0YAR2	1137	32230	41	41	14	14	5.24	Polyadenylate-binding protein 1 (Fragment) OS=Homo sapiens GN=PABPC1 PE=1 SV=1
2	5	UniProt_human	P02538	1125	60008	54	54	18	18	3.1	Keratin, type II cytoskeletal 6A OS=Homo sapiens GN=KRT6A PE=1 SV=3
62	1	UniProt_human	P14618	1125	57900	43	43	18	18	3.01	Pyruvate kinase PKM OS=Homo sapiens GN=PKM PE=1 SV=4
63	1	UniProt_human	Q9Y2Z2-4	1115	77252	44	44	19	19	1.84	Isoform 5 of Protein MTO1 homolog, mitochondrial OS=Homo sapiens GN=MTO1
64	1	UniProt_human	F8WJN3	1104	52238	40	40	9	9	1.07	Cleavage and polyadenylation-specificity factor subunit 6 OS=Homo sapiens GN=CPSF6 PE=1 SV=1
65	1	UniProt_human	P26038	1095	67778	38	38	16	16	1.72	Moesin OS=Homo sapiens GN=MSN PE=1 SV=3
66	1	UniProt_human	P40227	1072	57988	50	50	21	21	3.99	T-complex protein 1 subunit zeta OS=Homo sapiens GN=CCT6A PE=1 SV=3
31	2	UniProt_human	H3BLZ8	1068	80389	48	48	18	18	1.59	Probable ATP-dependent RNA helicase DDX17 OS=Homo sapiens GN=DDX17 PE=1 SV=1
67	1	UniProt_human	O75419	1053	65527	51	51	14	14	1.47	Cell division control protein 45 homolog OS=Homo sapiens GN=CDC45 PE=1 SV=1
2	6	UniProt_human	P13647	1052	62340	58	58	20	20	3.16	Keratin, type II cytoskeletal 5 OS=Homo sapiens GN=KRT5 PE=1 SV=3
68	1	UniProt_human	P19338	1049	76568	34	34	16	16	1.56	Nucleolin OS=Homo sapiens GN=NCL PE=1 SV=3
69	1	UniProt_human	P20700	1040	66368	38	38	20	20	2.58	Lamin-B1 OS=Homo sapiens GN=LMNB1 PE=1 SV=2
70	1	UniProt_human	A6NLN1	1029	56475	32	32	13	13	1.85	Polypyrimidine tract binding protein 1, isoform CRA_b OS=Homo sapiens GN=PTBP1 PE=1 SV=4
71	1	UniProt_human	P35637	1027	53394	33	33	9	9	1.04	RNA-binding protein FUS OS=Homo sapiens GN=FUS PE=1 SV=1
72	1	UniProt_human	P40939	1026	82947	35	35	13	13	0.94	Trifunctional enzyme subunit alpha, mitochondrial OS=Homo sapiens GN=HADHA PE=1 SV=2
65	2	UniProt_human	P15311	1008	69370	44	44	20	20	2.39	Ezrin OS=Homo sapiens GN=EZR PE=1 SV=4
73	1	UniProt_human	Q9BW92	996	80985	39	39	19	19	1.7	Threonine--tRNA ligase, mitochondrial OS=Homo sapiens GN=TARS2 PE=1 SV=1
74	1	UniProt_human	O43242	992	60939	41	41	20	20	3.01	26S proteasome non-ATPase regulatory subunit 3 OS=Homo sapiens GN=PSMD3 PE=1 SV=2
35	2	UniProt_human	Q9UN86-2	981	50786	49	49	13	13	2.48	Isoform B of Ras GTPase-activating protein-binding protein 2 OS=Homo sapiens GN=G3BP2
75	1	UniProt_human	H0YIV4	977	44687	31	31	8	8	1.34	Nucleosome assembly protein 1-like 1 (Fragment) OS=Homo sapiens GN=NAP1L1 PE=1 SV=1
28	2	UniProt_human	O00425	975	63666	34	34	13	13	1.37	Insulin-like growth factor 2 mRNA-binding protein 3 OS=Homo sapiens GN=IGF2BP3 PE=1 SV=2
76	1	UniProt_human	O43301	966	74932	28	28	15	15	1.34	Heat shock 70 kDa protein 12A OS=Homo sapiens GN=HSPA12A PE=1 SV=2
77	1	UniProt_human	O15371	966	63932	27	27	9	9	0.82	Eukaryotic translation initiation factor 3 subunit D OS=Homo sapiens GN=EIF3D PE=1 SV=1
78	1	UniProt_human	Q6P1M0	963	72018	32	32	15	15	1.42	Long-chain fatty acid transport protein 4 OS=Homo sapiens GN=SLC27A4 PE=1 SV=1
79	1	UniProt_human	Q6PJG6	950	88063	26	26	12	12	0.78	BRCA1-associated ATM activator 1 OS=Homo sapiens GN=BRAT1 PE=1 SV=2
80	1	UniProt_human	Q86YV9	950	82923	33	33	16	16	1.27	Hermansky-Pudlak syndrome 6 protein OS=Homo sapiens GN=HPS6 PE=1 SV=1
81	1	UniProt_human	P04049	934	73005	40	40	17	17	2.19	RAF proto-oncogene serine/threonine-protein kinase OS=Homo sapiens GN=RAF1 PE=1 SV=1
82	1	UniProt_human	Q8NI60-3	931	66585	31	31	13	13	1.44	Isoform 3 of Atypical kinase ADCK3, mitochondrial OS=Homo sapiens GN=ADCK3
81	2	UniProt_human	P10398	917	67542	34	34	14	14	1.56	Serine/threonine-protein kinase A-Raf OS=Homo sapiens GN=ARAF PE=1 SV=2
83	1	UniProt_human	P17812	913	66648	27	27	10	10	0.89	CTP synthase 1 OS=Homo sapiens GN=CTPS1 PE=1 SV=2
84	1	UniProt_human	P10515	910	68953	33	33	10	10	0.97	Dihydrolipoyllysine-residue acetyltransferase component of pyruvate dehydrogenase complex, mitochondrial OS=Homo sapiens GN=DLAT PE=1 SV=3
85	1	UniProt_human	P62191	896	49154	35	35	15	15	2.63	26S protease regulatory subunit 4 OS=Homo sapiens GN=PSMC1 PE=1 SV=1
86	1	UniProt_human	Q12931	892	80060	27	27	15	15	1.21	Heat shock protein 75 kDa, mitochondrial OS=Homo sapiens GN=TRAP1 PE=1 SV=3
31	3	UniProt_human	J3KTA4	891	69044	42	42	15	15	1.51	Probable ATP-dependent RNA helicase DDX5 OS=Homo sapiens GN=DDX5 PE=1 SV=1
87	1	UniProt_human	A8DPD7	863	63472	28	28	13	13	1.38	Protein zyg-11 homolog B OS=Homo sapiens GN=ZYG11B PE=1 SV=1
88	1	UniProt_human	A0A1B0GTU4	838	115832	28	28	10	10	0.5	Paxillin OS=Homo sapiens GN=PXN PE=4 SV=1
89	1	UniProt_human	Q9Y5A9	838	62296	38	38	9	9	1.42	YTH domain-containing family protein 2 OS=Homo sapiens GN=YTHDF2 PE=1 SV=2
90	1	UniProt_human	P53350	833	68212	35	35	13	13	1.24	Serine/threonine-protein kinase PLK1 OS=Homo sapiens GN=PLK1 PE=1 SV=1
91	1	UniProt_human	Q5T160	828	65464	39	39	25	25	4.04	Probable arginine--tRNA ligase, mitochondrial OS=Homo sapiens GN=RARS2 PE=1 SV=1
92	1	UniProt_human	H3BQK0	817	54465	30	30	13	13	1.74	ATP-dependent RNA helicase DDX19B OS=Homo sapiens GN=DDX19B PE=1 SV=1
93	1	UniProt_human	Q92558	815	61614	33	33	10	10	1.13	Wiskott-Aldrich syndrome protein family member 1 OS=Homo sapiens GN=WASF1 PE=1 SV=1
94	1	UniProt_human	P07237	808	57081	28	28	14	14	1.82	Protein disulfide-isomerase OS=Homo sapiens GN=P4HB PE=1 SV=3
69	2	UniProt_human	P02545	804	74095	36	36	21	21	2.32	Prelamin-A/C OS=Homo sapiens GN=LMNA PE=1 SV=1
95	1	UniProt_human	Q53EL6	800	51703	27	27	9	9	1.09	Programmed cell death protein 4 OS=Homo sapiens GN=PDCD4 PE=1 SV=2
65	3	UniProt_human	P35241	795	68521	36	36	15	15	1.53	Radixin OS=Homo sapiens GN=RDX PE=1 SV=1
73	2	UniProt_human	U3KQG0	772	71439	33	33	17	17	1.74	Threonine--tRNA ligase, mitochondrial OS=Homo sapiens GN=TARS2 PE=1 SV=1
96	1	UniProt_human	Q99615	772	56405	33	33	13	13	1.65	DnaJ homolog subfamily C member 7 OS=Homo sapiens GN=DNAJC7 PE=1 SV=2
97	1	UniProt_human	A0A0C4DGB6	765	69181	20	20	5	5	0.44	Serum albumin OS=Homo sapiens GN=ALB PE=1 SV=1
98	1	UniProt_human	Q14318	765	44534	20	20	7	7	1.35	Peptidyl-prolyl cis-trans isomerase FKBP8 OS=Homo sapiens GN=FKBP8 PE=1 SV=2
4	4	UniProt_human	P08779	748	51236	33	33	13	13	2.17	Keratin, type I cytoskeletal 16 OS=Homo sapiens GN=KRT16 PE=1 SV=4
99	1	UniProt_human	Q9Y3Z3	745	72155	40	40	18	18	1.88	Deoxynucleoside triphosphate triphosphohydrolase SAMHD1 OS=Homo sapiens GN=SAMHD1 PE=1 SV=2
100	1	UniProt_human	Q9Y4W6	742	88528	36	36	21	21	1.73	AFG3-like protein 2 OS=Homo sapiens GN=AFG3L2 PE=1 SV=2
4	5	UniProt_human	Q04695	735	48076	27	27	12	12	1.87	Keratin, type I cytoskeletal 17 OS=Homo sapiens GN=KRT17 PE=1 SV=2
101	1	UniProt_human	Q9H845	733	68717	22	22	10	10	0.85	Acyl-CoA dehydrogenase family member 9, mitochondrial OS=Homo sapiens GN=ACAD9 PE=1 SV=1
102	1	UniProt_human	Q15046	732	68005	44	44	20	20	2.7	Lysine--tRNA ligase OS=Homo sapiens GN=KARS PE=1 SV=3
103	1	UniProt_human	Q96SZ6	730	67646	22	22	11	11	0.99	CDK5 regulatory subunit-associated protein 1 OS=Homo sapiens GN=CDK5RAP1 PE=1 SV=2
104	1	UniProt_human	P55072	727	89266	37	37	17	17	1.24	Transitional endoplasmic reticulum ATPase OS=Homo sapiens GN=VCP PE=1 SV=4
105	1	UniProt_human	Q9H5Z1	724	78860	26	26	15	15	1.24	Probable ATP-dependent RNA helicase DHX35 OS=Homo sapiens GN=DHX35 PE=1 SV=2
92	2	UniProt_human	F6QDS0	721	53984	27	27	12	12	1.56	HCG2043426, isoform CRA_b OS=Homo sapiens GN=hCG_2043426 PE=1 SV=1
106	1	UniProt_human	Q8N684	710	52018	32	32	13	13	1.88	Cleavage and polyadenylation specificity factor subunit 7 OS=Homo sapiens GN=CPSF7 PE=1 SV=1
107	1	UniProt_human	A0A087X0W8	708	49538	26	26	10	10	1.35	Transcription factor p65 OS=Homo sapiens GN=RELA PE=1 SV=1
108	1	UniProt_human	J3KPF3	708	68059	28	28	14	14	1.39	4F2 cell-surface antigen heavy chain OS=Homo sapiens GN=SLC3A2 PE=1 SV=1
109	1	UniProt_human	Q9UMS4	708	55146	31	31	10	10	1.15	Pre-mRNA-processing factor 19 OS=Homo sapiens GN=PRPF19 PE=1 SV=1
110	1	UniProt_human	Q9BVQ7	704	80660	28	28	15	15	1.2	Spermatogenesis-associated protein 5-like protein 1 OS=Homo sapiens GN=SPATA5L1 PE=1 SV=2
111	1	UniProt_human	Q9NVH1	695	63239	35	35	14	14	1.55	DnaJ homolog subfamily C member 11 OS=Homo sapiens GN=DNAJC11 PE=1 SV=2
112	1	UniProt_human	A0A0A0MRT6	693	51738	38	38	13	13	2.14	Abl interactor 1 OS=Homo sapiens GN=ABI1 PE=1 SV=1
113	1	UniProt_human	O14980	687	123306	27	27	19	19	0.92	Exportin-1 OS=Homo sapiens GN=XPO1 PE=1 SV=1
18	2	UniProt_human	Q8WXF1	686	58706	23	23	10	10	1.06	Paraspeckle component 1 OS=Homo sapiens GN=PSPC1 PE=1 SV=1
114	1	UniProt_human	Q13546	664	75883	23	23	12	12	0.95	Receptor-interacting serine/threonine-protein kinase 1 OS=Homo sapiens GN=RIPK1 PE=1 SV=3
115	1	UniProt_human	Q96DF8	655	52536	22	22	12	12	1.63	Protein DGCR14 OS=Homo sapiens GN=DGCR14 PE=1 SV=1
116	1	UniProt_human	Q9BQ70	653	76619	22	22	9	9	0.74	Transcription factor 25 OS=Homo sapiens GN=TCF25 PE=1 SV=1
117	1	UniProt_human	Q4G104	653	62476	25	25	12	12	1.25	F-box only protein 21 OS=Homo sapiens GN=FBXO21 PE=1 SV=1
118	1	UniProt_human	I3L0N3	646	82040	34	34	20	20	1.81	Vesicle-fusing ATPase OS=Homo sapiens GN=NSF PE=1 SV=1
119	1	UniProt_human	P04745	644	57731	18	18	6	6	0.55	Alpha-amylase 1 OS=Homo sapiens GN=AMY1A PE=1 SV=2
120	1	UniProt_human	Q96JJ7	639	51839	17	17	10	10	1.26	Protein disulfide-isomerase TMX3 OS=Homo sapiens GN=TMX3 PE=1 SV=2
121	1	UniProt_human	E9PEB5	637	68861	25	25	10	10	0.97	Far upstream element-binding protein 1 OS=Homo sapiens GN=FUBP1 PE=1 SV=1
122	1	UniProt_human	Q8WVM8	635	72334	17	17	11	11	0.9	Sec1 family domain-containing protein 1 OS=Homo sapiens GN=SCFD1 PE=1 SV=4
123	1	UniProt_human	P05141	632	32831	33	33	10	10	2.6	ADP/ATP translocase 2 OS=Homo sapiens GN=SLC25A5 PE=1 SV=7
124	1	UniProt_human	Q13409-2	631	70601	16	16	9	9	0.72	Isoform 2B of Cytoplasmic dynein 1 intermediate chain 2 OS=Homo sapiens GN=DYNC1I2
125	1	UniProt_human	O76031	625	69181	31	31	17	17	1.83	ATP-dependent Clp protease ATP-binding subunit clpX-like, mitochondrial OS=Homo sapiens GN=CLPX PE=1 SV=2
126	1	UniProt_human	P08243	621	64329	33	33	14	14	1.68	Asparagine synthetase [glutamine-hydrolyzing] OS=Homo sapiens GN=ASNS PE=1 SV=4
127	1	UniProt_human	P41250	616	83113	25	25	14	14	1.15	Glycine--tRNA ligase OS=Homo sapiens GN=GARS PE=1 SV=3
128	1	UniProt_human	Q9NYY8	615	81410	20	20	9	9	0.6	FAST kinase domain-containing protein 2, mitochondrial OS=Homo sapiens GN=FASTKD2 PE=1 SV=1
129	1	UniProt_human	O94776	612	74976	30	30	13	13	1.09	Metastasis-associated protein MTA2 OS=Homo sapiens GN=MTA2 PE=1 SV=1
130	1	UniProt_human	Q9UBB6	610	78814	22	22	5	5	0.31	Neurochondrin OS=Homo sapiens GN=NCDN PE=1 SV=1
131	1	UniProt_human	Q07666	606	48197	29	29	8	8	1.2	KH domain-containing, RNA-binding, signal transduction-associated protein 1 OS=Homo sapiens GN=KHDRBS1 PE=1 SV=1
132	1	UniProt_human	Q9NVV4	603	66130	25	25	12	12	1.16	Poly(A) RNA polymerase, mitochondrial OS=Homo sapiens GN=MTPAP PE=1 SV=1
133	1	UniProt_human	Q16555	601	62255	25	25	11	11	1.42	Dihydropyrimidinase-related protein 2 OS=Homo sapiens GN=DPYSL2 PE=1 SV=1
134	1	UniProt_human	Q9NPQ8	596	59671	21	21	12	12	1.34	Synembryn-A OS=Homo sapiens GN=RIC8A PE=1 SV=3
135	1	UniProt_human	A0A0B4J1R6	595	49879	20	20	9	9	1.15	Transketolase OS=Homo sapiens GN=TKT PE=1 SV=1
136	1	UniProt_human	P61221	586	67271	27	27	12	12	1.13	ATP-binding cassette sub-family E member 1 OS=Homo sapiens GN=ABCE1 PE=1 SV=1
137	1	UniProt_human	Q6SZW1	579	79338	20	20	11	11	0.8	Sterile alpha and TIR motif-containing protein 1 OS=Homo sapiens GN=SARM1 PE=1 SV=1
138	1	UniProt_human	O95573	574	80368	26	26	13	13	0.99	Long-chain-fatty-acid--CoA ligase 3 OS=Homo sapiens GN=ACSL3 PE=1 SV=3
86	2	UniProt_human	P08238	573	83212	21	21	11	11	0.75	Heat shock protein HSP 90-beta OS=Homo sapiens GN=HSP90AB1 PE=1 SV=4
139	1	UniProt_human	A0A087WTA5	573	57460	18	18	12	12	1.42	Translation initiation factor eIF-2B subunit delta OS=Homo sapiens GN=EIF2B4 PE=1 SV=1
2	7	UniProt_human	Q7Z794	566	61864	30	30	7	7	0.85	Keratin, type II cytoskeletal 1b OS=Homo sapiens GN=KRT77 PE=2 SV=3
140	1	UniProt_human	Q14498	566	59343	21	21	9	9	0.9	RNA-binding protein 39 OS=Homo sapiens GN=RBM39 PE=1 SV=2
141	1	UniProt_human	P27694	561	68095	23	23	13	13	1.25	Replication protein A 70 kDa DNA-binding subunit OS=Homo sapiens GN=RPA1 PE=1 SV=2
142	1	UniProt_human	I3L4I4	554	52153	24	24	8	8	1.07	TOM1-like protein 1 OS=Homo sapiens GN=TOM1L1 PE=1 SV=1
143	1	UniProt_human	P17858	547	84964	17	17	10	10	0.65	ATP-dependent 6-phosphofructokinase, liver type OS=Homo sapiens GN=PFKL PE=1 SV=6
89	2	UniProt_human	A0A024R7W5	546	58275	19	19	7	7	0.79	YTH domain family, member 3, isoform CRA_a OS=Homo sapiens GN=YTHDF3 PE=1 SV=1
123	2	UniProt_human	P12236	544	32845	26	26	8	8	1.79	ADP/ATP translocase 3 OS=Homo sapiens GN=SLC25A6 PE=1 SV=4
144	1	UniProt_human	P0DN79	542	60548	17	17	9	9	0.88	Cystathionine beta-synthase-like protein OS=Homo sapiens GN=CBSL PE=1 SV=1
145	1	UniProt_human	A1L0T0	538	67825	16	16	7	7	0.55	Acetolactate synthase-like protein OS=Homo sapiens GN=ILVBL PE=1 SV=2
146	1	UniProt_human	Q9NWZ5	533	61103	24	24	12	12	1.3	Uridine-cytidine kinase-like 1 OS=Homo sapiens GN=UCKL1 PE=1 SV=2
147	1	UniProt_human	E9PEX6	532	51783	20	20	6	6	0.77	Dihydrolipoyl dehydrogenase OS=Homo sapiens GN=DLD PE=1 SV=1
148	1	UniProt_human	A0A0A0MSN7	530	52868	19	19	7	7	0.75	Protein arginine N-methyltransferase 3 OS=Homo sapiens GN=PRMT3 PE=1 SV=1
149	1	UniProt_human	Q9BVP2	529	61954	23	23	13	13	1.6	Guanine nucleotide-binding protein-like 3 OS=Homo sapiens GN=GNL3 PE=1 SV=2
2	8	UniProt_human	P19013	517	57250	19	19	4	4	0.68	Keratin, type II cytoskeletal 4 OS=Homo sapiens GN=KRT4 PE=1 SV=4
150	1	UniProt_human	Q00587	517	40270	24	24	11	11	2.16	Cdc42 effector protein 1 OS=Homo sapiens GN=CDC42EP1 PE=1 SV=1
151	1	UniProt_human	Q08380	516	65289	20	20	10	10	0.91	Galectin-3-binding protein OS=Homo sapiens GN=LGALS3BP PE=1 SV=1
152	1	UniProt_human	Q9HCC0	515	61294	17	17	11	11	1.14	Methylcrotonoyl-CoA carboxylase beta chain, mitochondrial OS=Homo sapiens GN=MCCC2 PE=1 SV=1
153	1	UniProt_human	P51659	510	79636	16	16	13	13	1	Peroxisomal multifunctional enzyme type 2 OS=Homo sapiens GN=HSD17B4 PE=1 SV=3
154	1	UniProt_human	Q8N1F7	499	93430	23	23	16	16	1.07	Nuclear pore complex protein Nup93 OS=Homo sapiens GN=NUP93 PE=1 SV=2
155	1	UniProt_human	Q96PK6	498	69449	22	22	13	13	1.21	RNA-binding protein 14 OS=Homo sapiens GN=RBM14 PE=1 SV=2
156	1	UniProt_human	P16989	498	40066	13	13	6	6	0.88	Y-box-binding protein 3 OS=Homo sapiens GN=YBX3 PE=1 SV=4
157	1	UniProt_human	O00311	495	63848	27	27	14	14	1.53	Cell division cycle 7-related protein kinase OS=Homo sapiens GN=CDC7 PE=1 SV=1
158	1	UniProt_human	Q8NFQ8	494	51232	23	23	10	10	1.28	Torsin-1A-interacting protein 2 OS=Homo sapiens GN=TOR1AIP2 PE=1 SV=1
159	1	UniProt_human	Q9Y263	491	87101	16	16	10	10	0.63	Phospholipase A-2-activating protein OS=Homo sapiens GN=PLAA PE=1 SV=2
160	1	UniProt_human	B1ALK7	490	79782	20	20	13	13	1	Rho guanine nucleotide exchange factor 7 OS=Homo sapiens GN=ARHGEF7 PE=1 SV=1
161	1	UniProt_human	Q8IXI1	490	68075	20	20	10	10	0.86	Mitochondrial Rho GTPase 2 OS=Homo sapiens GN=RHOT2 PE=1 SV=2
162	1	UniProt_human	Q8N1G4	481	63434	19	19	9	9	0.82	Leucine-rich repeat-containing protein 47 OS=Homo sapiens GN=LRRC47 PE=1 SV=1
163	1	UniProt_human	P54886	481	87248	24	24	16	16	1.18	Delta-1-pyrroline-5-carboxylate synthase OS=Homo sapiens GN=ALDH18A1 PE=1 SV=2
164	1	UniProt_human	Q9UHB9	478	70686	19	19	9	9	0.72	Signal recognition particle subunit SRP68 OS=Homo sapiens GN=SRP68 PE=1 SV=2
165	1	UniProt_human	P28288	473	75428	25	25	13	13	1.2	ATP-binding cassette sub-family D member 3 OS=Homo sapiens GN=ABCD3 PE=1 SV=1
166	1	UniProt_human	Q92783	473	59142	17	17	8	8	0.77	Signal transducing adapter molecule 1 OS=Homo sapiens GN=STAM PE=1 SV=3
167	1	UniProt_human	A6PW57	473	61219	11	11	7	7	0.62	Phosphatidylinositol 4-phosphate 5-kinase type-1 alpha OS=Homo sapiens GN=PIP5K1A PE=1 SV=2
168	1	UniProt_human	F8VZ44	473	45605	14	14	8	8	1.1	Aladin OS=Homo sapiens GN=AAAS PE=1 SV=1
169	1	UniProt_human	Q13043	471	55595	23	23	11	11	1.31	Serine/threonine-protein kinase 4 OS=Homo sapiens GN=STK4 PE=1 SV=2
170	1	UniProt_human	Q96S52	470	61617	17	17	9	9	0.86	GPI transamidase component PIG-S OS=Homo sapiens GN=PIGS PE=1 SV=3
34	2	UniProt_human	P30154	465	66171	17	17	11	11	1.02	Serine/threonine-protein phosphatase 2A 65 kDa regulatory subunit A beta isoform OS=Homo sapiens GN=PPP2R1B PE=1 SV=3
171	1	UniProt_human	P16591	465	94578	19	19	7	7	0.37	Tyrosine-protein kinase Fer OS=Homo sapiens GN=FER PE=1 SV=2
172	1	UniProt_human	Q96TC7	463	52086	14	14	9	9	1.08	Regulator of microtubule dynamics protein 3 OS=Homo sapiens GN=RMDN3 PE=1 SV=2
173	1	UniProt_human	Q8N6R0	463	78718	21	21	13	13	1.01	Methyltransferase-like protein 13 OS=Homo sapiens GN=METTL13 PE=1 SV=1
174	1	UniProt_human	A0A0A0MSB8	461	78760	18	18	13	13	1.01	Exocyst complex component 7 OS=Homo sapiens GN=EXOC7 PE=1 SV=1
175	1	UniProt_human	F5H365	461	82916	12	12	7	7	0.43	Protein transport protein Sec23A OS=Homo sapiens GN=SEC23A PE=1 SV=1
176	1	UniProt_human	Q6PI48	461	73516	22	22	10	10	0.89	Aspartate--tRNA ligase, mitochondrial OS=Homo sapiens GN=DARS2 PE=1 SV=1
177	1	UniProt_human	P12268	460	55770	17	17	9	9	0.98	Inosine-5'-monophosphate dehydrogenase 2 OS=Homo sapiens GN=IMPDH2 PE=1 SV=2
2	9	UniProt_human	P12035	458	64378	24	24	8	8	0.69	Keratin, type II cytoskeletal 3 OS=Homo sapiens GN=KRT3 PE=1 SV=3
178	1	UniProt_human	Q5VTE0	453	50153	16	16	6	6	0.66	Putative elongation factor 1-alpha-like 3 OS=Homo sapiens GN=EEF1A1P5 PE=5 SV=1
179	1	UniProt_human	O95793-2	453	54900	18	18	12	12	1.52	Isoform Short of Double-stranded RNA-binding protein Staufen homolog 1 OS=Homo sapiens GN=STAU1
180	1	UniProt_human	Q969N2	448	65658	22	22	9	9	0.79	GPI transamidase component PIG-T OS=Homo sapiens GN=PIGT PE=1 SV=1
181	1	UniProt_human	O60749	448	58435	17	17	11	11	1.22	Sorting nexin-2 OS=Homo sapiens GN=SNX2 PE=1 SV=2
182	1	UniProt_human	Q5SZR4	446	61482	12	12	7	7	0.62	Tudor and KH domain containing, isoform CRA_a OS=Homo sapiens GN=TDRKH PE=1 SV=1
183	1	UniProt_human	O15270	445	62884	15	15	8	8	0.71	Serine palmitoyltransferase 2 OS=Homo sapiens GN=SPTLC2 PE=1 SV=1
149	2	UniProt_human	Q9NVN8	444	65532	16	16	9	9	0.79	Guanine nucleotide-binding protein-like 3-like protein OS=Homo sapiens GN=GNL3L PE=1 SV=1
184	1	UniProt_human	Q15054	440	51368	25	25	10	10	1.47	DNA polymerase delta subunit 3 OS=Homo sapiens GN=POLD3 PE=1 SV=2
185	1	UniProt_human	Q8N5D0	438	75872	30	30	15	15	1.31	WD and tetratricopeptide repeats protein 1 OS=Homo sapiens GN=WDTC1 PE=1 SV=2
186	1	UniProt_human	Q96EY7	438	78500	16	16	8	8	0.54	Pentatricopeptide repeat domain-containing protein 3, mitochondrial OS=Homo sapiens GN=PTCD3 PE=1 SV=3
187	1	UniProt_human	P31948	437	62599	22	22	12	12	1.25	Stress-induced-phosphoprotein 1 OS=Homo sapiens GN=STIP1 PE=1 SV=1
188	1	UniProt_human	Q9BZE4	436	73918	21	21	12	12	0.99	Nucleolar GTP-binding protein 1 OS=Homo sapiens GN=GTPBP4 PE=1 SV=3
189	1	UniProt_human	Q9Y2X3	433	59541	18	18	9	9	0.9	Nucleolar protein 58 OS=Homo sapiens GN=NOP58 PE=1 SV=1
190	1	UniProt_human	Q16822	432	70685	17	17	12	12	1.05	Phosphoenolpyruvate carboxykinase [GTP], mitochondrial OS=Homo sapiens GN=PCK2 PE=1 SV=3
191	1	UniProt_human	B4E107	430	47804	16	16	6	6	0.7	Arginyl-tRNA--protein transferase 1 OS=Homo sapiens GN=ATE1 PE=1 SV=1
192	1	UniProt_human	Q92769	423	55329	22	22	8	8	0.84	Histone deacetylase 2 OS=Homo sapiens GN=HDAC2 PE=1 SV=2
193	1	UniProt_human	Q9UG63	422	71245	23	23	11	11	1.04	ATP-binding cassette sub-family F member 2 OS=Homo sapiens GN=ABCF2 PE=1 SV=2
194	1	UniProt_human	Q8WUA2	422	57189	9	9	6	6	0.56	Peptidyl-prolyl cis-trans isomerase-like 4 OS=Homo sapiens GN=PPIL4 PE=1 SV=1
195	1	UniProt_human	Q53R41	421	97348	17	17	11	11	0.62	FAST kinase domain-containing protein 1, mitochondrial OS=Homo sapiens GN=FASTKD1 PE=1 SV=1
196	1	UniProt_human	Q9H857	419	60680	21	21	13	13	1.48	5'-nucleotidase domain-containing protein 2 OS=Homo sapiens GN=NT5DC2 PE=1 SV=1
197	1	UniProt_human	Q12874	419	58812	12	12	8	8	0.78	Splicing factor 3A subunit 3 OS=Homo sapiens GN=SF3A3 PE=1 SV=1
28	3	UniProt_human	F8W930	415	66745	18	18	9	9	0.77	Insulin-like growth factor 2 mRNA-binding protein 2 OS=Homo sapiens GN=IGF2BP2 PE=1 SV=1
112	2	UniProt_human	A0A0C4DG21	412	54804	26	26	10	10	1.16	Abl interactor 2 OS=Homo sapiens GN=ABI2 PE=1 SV=1
198	1	UniProt_human	Q9Y6W5	412	54250	12	12	6	6	0.73	Wiskott-Aldrich syndrome protein family member 2 OS=Homo sapiens GN=WASF2 PE=1 SV=3
181	2	UniProt_human	Q13596	407	59033	12	12	6	6	0.54	Sorting nexin-1 OS=Homo sapiens GN=SNX1 PE=1 SV=3
199	1	UniProt_human	Q9BZE9	404	60146	15	15	9	9	0.88	Tether containing UBX domain for GLUT4 OS=Homo sapiens GN=ASPSCR1 PE=1 SV=1
200	1	UniProt_human	Q8IW92	403	72033	13	13	7	7	0.6	Beta-galactosidase-1-like protein 2 OS=Homo sapiens GN=GLB1L2 PE=2 SV=1
201	1	UniProt_human	P42166	400	75446	16	16	10	10	0.75	Lamina-associated polypeptide 2, isoform alpha OS=Homo sapiens GN=TMPO PE=1 SV=2
202	1	UniProt_human	Q8N442	400	74281	15	15	9	9	0.67	Translation factor GUF1, mitochondrial OS=Homo sapiens GN=GUF1 PE=1 SV=1
203	1	UniProt_human	Q13573	396	61456	18	18	10	10	0.99	SNW domain-containing protein 1 OS=Homo sapiens GN=SNW1 PE=1 SV=1
204	1	UniProt_human	G3V5R9	395	71363	18	18	12	12	1.04	Kinesin light chain 1 OS=Homo sapiens GN=KLC1 PE=1 SV=1
205	1	UniProt_human	P08621	395	51526	18	18	9	9	1.27	U1 small nuclear ribonucleoprotein 70 kDa OS=Homo sapiens GN=SNRNP70 PE=1 SV=2
206	1	UniProt_human	P52306	395	66275	12	12	8	8	0.67	Rap1 GTPase-GDP dissociation stimulator 1 OS=Homo sapiens GN=RAP1GDS1 PE=1 SV=3
207	1	UniProt_human	Q96F86	393	56042	15	15	6	6	0.57	Enhancer of mRNA-decapping protein 3 OS=Homo sapiens GN=EDC3 PE=1 SV=1
208	1	UniProt_human	O43353	392	61156	12	12	6	6	0.62	Receptor-interacting serine/threonine-protein kinase 2 OS=Homo sapiens GN=RIPK2 PE=1 SV=2
75	2	UniProt_human	Q99733	387	42797	15	15	7	7	0.99	Nucleosome assembly protein 1-like 4 OS=Homo sapiens GN=NAP1L4 PE=1 SV=1
209	1	UniProt_human	Q9UJW0	385	52304	14	14	7	7	0.76	Dynactin subunit 4 OS=Homo sapiens GN=DCTN4 PE=1 SV=1
210	1	UniProt_human	O14744	385	72638	15	15	9	9	0.69	Protein arginine N-methyltransferase 5 OS=Homo sapiens GN=PRMT5 PE=1 SV=4
211	1	UniProt_human	Q5VV42-2	380	54632	15	15	9	9	1.01	Isoform 2 of Threonylcarbamoyladenosine tRNA methylthiotransferase OS=Homo sapiens GN=CDKAL1
212	1	UniProt_human	Q10472	380	64177	16	16	9	9	0.81	Polypeptide N-acetylgalactosaminyltransferase 1 OS=Homo sapiens GN=GALNT1 PE=1 SV=1
213	1	UniProt_human	Q9H3U1	378	103011	11	11	9	9	0.45	Protein unc-45 homolog A OS=Homo sapiens GN=UNC45A PE=1 SV=1
214	1	UniProt_human	Q15051	375	68886	20	20	12	12	1.09	IQ calmodulin-binding motif-containing protein 1 OS=Homo sapiens GN=IQCB1 PE=1 SV=1
215	1	UniProt_human	Q9H9T3	375	62219	18	18	9	9	0.84	Elongator complex protein 3 OS=Homo sapiens GN=ELP3 PE=1 SV=2
216	1	UniProt_human	Q9Y6G9	371	56544	25	25	12	12	1.46	Cytoplasmic dynein 1 light intermediate chain 1 OS=Homo sapiens GN=DYNC1LI1 PE=1 SV=3
23	2	UniProt_human	O43390	369	70899	15	15	9	9	0.71	Heterogeneous nuclear ribonucleoprotein R OS=Homo sapiens GN=HNRNPR PE=1 SV=1
217	1	UniProt_human	A0AVF1	369	64136	17	17	12	12	1.21	Intraflagellar transport protein 56 OS=Homo sapiens GN=TTC26 PE=2 SV=1
218	1	UniProt_human	Q8NCE2	368	72158	8	8	6	6	0.42	Myotubularin-related protein 14 OS=Homo sapiens GN=MTMR14 PE=1 SV=2
219	1	UniProt_human	P52294	367	60184	9	9	2	2	0.24	Importin subunit alpha-5 OS=Homo sapiens GN=KPNA1 PE=1 SV=3
220	1	UniProt_human	J3KPP4	366	58185	11	11	6	6	0.55	Cisplatin resistance-associated overexpressed protein, isoform CRA_b OS=Homo sapiens GN=LUC7L3 PE=1 SV=1
221	1	UniProt_human	Q13112	364	61454	13	13	8	8	0.73	Chromatin assembly factor 1 subunit B OS=Homo sapiens GN=CHAF1B PE=1 SV=1
133	2	UniProt_human	O14531	362	61838	15	15	8	8	0.85	Dihydropyrimidinase-related protein 4 OS=Homo sapiens GN=DPYSL4 PE=1 SV=2
169	2	UniProt_human	Q13188	362	56265	27	27	13	13	1.66	Serine/threonine-protein kinase 3 OS=Homo sapiens GN=STK3 PE=1 SV=2
222	1	UniProt_human	P43304	358	80802	12	12	7	7	0.44	Glycerol-3-phosphate dehydrogenase, mitochondrial OS=Homo sapiens GN=GPD2 PE=1 SV=3
175	2	UniProt_human	Q15437	357	86424	11	11	5	5	0.28	Protein transport protein Sec23B OS=Homo sapiens GN=SEC23B PE=1 SV=2
223	1	UniProt_human	B9A018	355	62005	15	15	8	8	0.73	U4/U6.U5 tri-snRNP-associated protein 2 OS=Homo sapiens GN=USP39 PE=1 SV=1
224	1	UniProt_human	Q9NSD9	350	66074	24	24	12	12	1.16	Phenylalanine--tRNA ligase beta subunit OS=Homo sapiens GN=FARSB PE=1 SV=3
4	6	UniProt_human	Q7Z3Y8	349	49792	15	15	4	4	0.53	Keratin, type I cytoskeletal 27 OS=Homo sapiens GN=KRT27 PE=1 SV=2
201	2	UniProt_human	G5E972	348	46278	13	13	8	8	1.08	Lamina-associated polypeptide 2, isoforms beta/gamma OS=Homo sapiens GN=TMPO PE=1 SV=1
86	3	UniProt_human	P07900	347	84607	12	12	8	8	0.49	Heat shock protein HSP 90-alpha OS=Homo sapiens GN=HSP90AA1 PE=1 SV=5
225	1	UniProt_human	P08240	345	69767	14	14	12	12	1.07	Signal recognition particle receptor subunit alpha OS=Homo sapiens GN=SRPRA PE=1 SV=2
226	1	UniProt_human	Q96GA3	345	54821	14	14	8	8	0.85	Protein LTV1 homolog OS=Homo sapiens GN=LTV1 PE=1 SV=1
227	1	UniProt_human	A0A087X011	343	82713	14	14	10	10	0.67	Kinesin-like protein OS=Homo sapiens GN=KIF3A PE=1 SV=1
228	1	UniProt_human	O95429	342	49563	8	8	4	4	0.41	BAG family molecular chaperone regulator 4 OS=Homo sapiens GN=BAG4 PE=1 SV=1
229	1	UniProt_human	Q00325	341	40069	15	15	7	7	1.32	Phosphate carrier protein, mitochondrial OS=Homo sapiens GN=SLC25A3 PE=1 SV=2
230	1	UniProt_human	Q9UGJ1	337	76041	13	13	8	8	0.56	Gamma-tubulin complex component 4 OS=Homo sapiens GN=TUBGCP4 PE=1 SV=1
231	1	UniProt_human	C9JIF9	336	81622	13	13	9	9	0.6	Acylamino-acid-releasing enzyme OS=Homo sapiens GN=APEH PE=1 SV=1
232	1	UniProt_human	X6R9L0	335	51879	14	14	7	7	0.77	DnaJ homolog subfamily C member 3 OS=Homo sapiens GN=DNAJC3 PE=1 SV=1
192	2	UniProt_human	Q13547	329	55068	15	15	7	7	0.71	Histone deacetylase 1 OS=Homo sapiens GN=HDAC1 PE=1 SV=1
233	1	UniProt_human	Q8TAF3	329	76162	15	15	10	10	0.75	WD repeat-containing protein 48 OS=Homo sapiens GN=WDR48 PE=1 SV=1
234	1	UniProt_human	G5E9W3	328	73430	19	19	10	10	0.78	Cleavage and polyadenylation specific factor 3, 73kDa, isoform CRA_b OS=Homo sapiens GN=CPSF3 PE=1 SV=1
235	1	UniProt_human	Q9NUL7	326	59545	8	8	6	6	0.53	Probable ATP-dependent RNA helicase DDX28 OS=Homo sapiens GN=DDX28 PE=1 SV=2
236	1	UniProt_human	Q08209	325	58650	13	13	7	7	0.66	Serine/threonine-protein phosphatase 2B catalytic subunit alpha isoform OS=Homo sapiens GN=PPP3CA PE=1 SV=1
237	1	UniProt_human	Q9UJX2	325	68790	12	12	7	7	0.54	Cell division cycle protein 23 homolog OS=Homo sapiens GN=CDC23 PE=1 SV=3
238	1	UniProt_human	O00178	324	72408	10	10	7	7	0.6	GTP-binding protein 1 OS=Homo sapiens GN=GTPBP1 PE=1 SV=3
160	2	UniProt_human	Q15052	319	87443	10	10	6	6	0.34	Rho guanine nucleotide exchange factor 6 OS=Homo sapiens GN=ARHGEF6 PE=1 SV=2
239	1	UniProt_human	Q9BV44	318	56967	13	13	7	7	0.68	THUMP domain-containing protein 3 OS=Homo sapiens GN=THUMPD3 PE=1 SV=1
240	1	UniProt_human	Q96LB3	318	69196	10	10	6	6	0.44	Intraflagellar transport protein 74 homolog OS=Homo sapiens GN=IFT74 PE=1 SV=1
241	1	UniProt_human	Q86X55	317	65811	13	13	7	7	0.67	Histone-arginine methyltransferase CARM1 OS=Homo sapiens GN=CARM1 PE=1 SV=3
242	1	UniProt_human	E9PJ55	316	67196	14	14	9	9	0.76	T-complex protein 11-like protein 1 OS=Homo sapiens GN=TCP11L1 PE=1 SV=1
243	1	UniProt_human	Q9UJX3	311	66813	11	11	6	6	0.46	Anaphase-promoting complex subunit 7 OS=Homo sapiens GN=ANAPC7 PE=1 SV=4
244	1	UniProt_human	Q9UK73	309	70220	16	16	12	12	1.06	Protein fem-1 homolog B OS=Homo sapiens GN=FEM1B PE=1 SV=1
245	1	UniProt_human	Q9P2N7	308	73820	13	13	9	9	0.68	Kelch-like protein 13 OS=Homo sapiens GN=KLHL13 PE=1 SV=3
2	10	UniProt_human	A0A087WYI0	307	56305	14	14	8	8	0.97	Integrator complex subunit 11 OS=Homo sapiens GN=CPSF3L PE=1 SV=1
246	1	UniProt_human	Q02413	306	113676	8	8	5	5	0.21	Desmoglein-1 OS=Homo sapiens GN=DSG1 PE=1 SV=2
247	1	UniProt_human	Q9BY44	305	64949	12	12	9	9	0.8	Eukaryotic translation initiation factor 2A OS=Homo sapiens GN=EIF2A PE=1 SV=3
248	1	UniProt_human	Q14739	299	70658	10	10	6	6	0.43	Lamin-B receptor OS=Homo sapiens GN=LBR PE=1 SV=2
249	1	UniProt_human	Q5T7U1	299	52257	13	13	8	8	0.91	General transcription factor 3C polypeptide 5 OS=Homo sapiens GN=GTF3C5 PE=1 SV=1
250	1	UniProt_human	P10155	299	60631	11	11	4	4	0.32	60 kDa SS-A/Ro ribonucleoprotein OS=Homo sapiens GN=TROVE2 PE=1 SV=2
251	1	UniProt_human	F5H2F4	298	110544	15	15	11	11	0.53	C-1-tetrahydrofolate synthase, cytoplasmic OS=Homo sapiens GN=MTHFD1 PE=1 SV=1
252	1	UniProt_human	P49915	296	76667	18	18	12	12	0.94	GMP synthase [glutamine-hydrolyzing] OS=Homo sapiens GN=GMPS PE=1 SV=1
253	1	UniProt_human	Q969Z0	295	70693	16	16	9	9	0.72	Protein TBRG4 OS=Homo sapiens GN=TBRG4 PE=1 SV=1
254	1	UniProt_human	Q9UH99	293	80262	8	8	6	6	0.37	SUN domain-containing protein 2 OS=Homo sapiens GN=SUN2 PE=1 SV=3
255	1	UniProt_human	Q6UUV7	290	66918	9	9	6	6	0.46	CREB-regulated transcription coactivator 3 OS=Homo sapiens GN=CRTC3 PE=1 SV=2
256	1	UniProt_human	Q14145	290	69621	16	16	9	9	0.73	Kelch-like ECH-associated protein 1 OS=Homo sapiens GN=KEAP1 PE=1 SV=2
257	1	UniProt_human	Q9H0U9	287	49162	9	9	5	5	0.54	Testis-specific Y-encoded-like protein 1 OS=Homo sapiens GN=TSPYL1 PE=1 SV=3
258	1	UniProt_human	P14866	286	64092	15	15	8	8	0.7	Heterogeneous nuclear ribonucleoprotein L OS=Homo sapiens GN=HNRNPL PE=1 SV=2
259	1	UniProt_human	H0YDU8	285	55172	8	8	6	6	0.58	Serine/threonine-protein phosphatase (Fragment) OS=Homo sapiens GN=PPP5C PE=1 SV=1
260	1	UniProt_human	O95140	285	86347	12	12	7	7	0.41	Mitofusin-2 OS=Homo sapiens GN=MFN2 PE=1 SV=3
261	1	UniProt_human	Q04864	284	68476	19	19	12	12	1.1	Proto-oncogene c-Rel OS=Homo sapiens GN=REL PE=1 SV=1
262	1	UniProt_human	Q8TC07	283	79440	13	13	11	11	0.8	TBC1 domain family member 15 OS=Homo sapiens GN=TBC1D15 PE=1 SV=2
263	1	UniProt_human	G3V3G9	282	84700	8	8	6	6	0.35	Uncharacterized protein OS=Homo sapiens PE=4 SV=1
264	1	UniProt_human	B5MCF9	281	66036	13	13	9	9	0.78	Pescadillo homolog OS=Homo sapiens GN=PES1 PE=1 SV=1
265	1	UniProt_human	P37198	281	53222	12	12	6	6	0.61	Nuclear pore glycoprotein p62 OS=Homo sapiens GN=NUP62 PE=1 SV=3
266	1	UniProt_human	P53985	278	53909	10	10	5	5	0.48	Monocarboxylate transporter 1 OS=Homo sapiens GN=SLC16A1 PE=1 SV=3
267	1	UniProt_human	H3BSH7	277	77894	7	7	5	5	0.31	U3 small nucleolar RNA-associated protein 4 homolog (Fragment) OS=Homo sapiens GN=UTP4 PE=1 SV=1
83	2	UniProt_human	Q9NRF8	274	65636	11	11	5	5	0.38	CTP synthase 2 OS=Homo sapiens GN=CTPS2 PE=1 SV=1
268	1	UniProt_human	Q14CZ7	273	75641	8	8	5	5	0.32	FAST kinase domain-containing protein 3, mitochondrial OS=Homo sapiens GN=FASTKD3 PE=1 SV=2
269	1	UniProt_human	A0A0C4DGA6	273	113786	12	12	9	9	0.35	Helicase-like transcription factor OS=Homo sapiens GN=HLTF PE=1 SV=1
270	1	UniProt_human	O95905	272	72712	10	10	7	7	0.5	Protein ecdysoneless homolog OS=Homo sapiens GN=ECD PE=1 SV=1
271	1	UniProt_human	Q9NRK6	272	79098	9	9	8	8	0.54	ATP-binding cassette sub-family B member 10, mitochondrial OS=Homo sapiens GN=ABCB10 PE=1 SV=2
272	1	UniProt_human	Q86U38	270	69394	6	6	5	5	0.36	Nucleolar protein 9 OS=Homo sapiens GN=NOP9 PE=1 SV=1
273	1	UniProt_human	O43172	269	58412	8	8	5	5	0.44	U4/U6 small nuclear ribonucleoprotein Prp4 OS=Homo sapiens GN=PRPF4 PE=1 SV=2
274	1	UniProt_human	Q9BPZ7	269	59086	12	12	6	6	0.54	Target of rapamycin complex 2 subunit MAPKAP1 OS=Homo sapiens GN=MAPKAP1 PE=1 SV=2
275	1	UniProt_human	Q06203	266	57362	8	8	5	5	0.45	Amidophosphoribosyltransferase OS=Homo sapiens GN=PPAT PE=1 SV=1
276	1	UniProt_human	Q16204	264	53258	10	10	7	7	0.74	Coiled-coil domain-containing protein 6 OS=Homo sapiens GN=CCDC6 PE=1 SV=2
161	2	UniProt_human	Q8IXI2	262	70739	11	11	6	6	0.43	Mitochondrial Rho GTPase 1 OS=Homo sapiens GN=RHOT1 PE=1 SV=2
277	1	UniProt_human	O15355	260	59235	13	13	5	5	0.53	Protein phosphatase 1G OS=Homo sapiens GN=PPM1G PE=1 SV=1
278	1	UniProt_human	Q9BST9	255	62628	7	7	5	5	0.4	Rhotekin OS=Homo sapiens GN=RTKN PE=1 SV=2
6	4	UniProt_human	A6NHL2	254	49877	11	11	4	4	0.53	Tubulin alpha chain-like 3 OS=Homo sapiens GN=TUBAL3 PE=1 SV=2
279	1	UniProt_human	H0Y8P4	251	61393	8	8	5	5	0.41	U3 small nucleolar RNA-associated protein 15 homolog (Fragment) OS=Homo sapiens GN=UTP15 PE=1 SV=1
280	1	UniProt_human	Q9BW27	249	74971	12	12	9	9	0.66	Nuclear pore complex protein Nup85 OS=Homo sapiens GN=NUP85 PE=1 SV=1
281	1	UniProt_human	F2Z2W7	248	70790	21	21	8	8	0.61	tRNA (uracil-5-)-methyltransferase homolog A OS=Homo sapiens GN=TRMT2A PE=1 SV=1
282	1	UniProt_human	E9PHH9	248	46160	4	4	2	2	0.2	DNA-directed RNA polymerase III subunit RPC3 OS=Homo sapiens GN=POLR3C PE=1 SV=1
283	1	UniProt_human	Q9H223	247	61137	12	12	10	10	1	EH domain-containing protein 4 OS=Homo sapiens GN=EHD4 PE=1 SV=1
284	1	UniProt_human	O75330	246	84049	11	11	8	8	0.5	Hyaluronan mediated motility receptor OS=Homo sapiens GN=HMMR PE=1 SV=2
285	1	UniProt_human	Q9Y6J9	246	67772	6	6	4	4	0.28	TAF6-like RNA polymerase II p300/CBP-associated factor-associated factor 65 kDa subunit 6L OS=Homo sapiens GN=TAF6L PE=1 SV=1
121	2	UniProt_human	Q96I24	245	61602	12	12	9	9	0.86	Far upstream element-binding protein 3 OS=Homo sapiens GN=FUBP3 PE=1 SV=2
286	1	UniProt_human	P36578	245	47667	12	12	6	6	0.7	60S ribosomal protein L4 OS=Homo sapiens GN=RPL4 PE=1 SV=5
287	1	UniProt_human	Q06124	244	68393	14	14	10	10	0.86	Tyrosine-protein phosphatase non-receptor type 11 OS=Homo sapiens GN=PTPN11 PE=1 SV=2
288	1	UniProt_human	Q9Y223	244	79224	11	11	9	9	0.62	Bifunctional UDP-N-acetylglucosamine 2-epimerase/N-acetylmannosamine kinase OS=Homo sapiens GN=GNE PE=1 SV=1
289	1	UniProt_human	A0A087WT87	244	54173	5	5	3	3	0.26	Amino acid transporter OS=Homo sapiens GN=SLC1A3 PE=1 SV=1
290	1	UniProt_human	S4R403	244	59164	8	8	5	5	0.43	Afadin- and alpha-actinin-binding protein OS=Homo sapiens GN=SSX2IP PE=1 SV=1
291	1	UniProt_human	P41162	243	56966	8	8	4	4	0.35	ETS translocation variant 3 OS=Homo sapiens GN=ETV3 PE=1 SV=2
292	1	UniProt_human	O75351	243	49271	11	11	5	5	0.54	Vacuolar protein sorting-associated protein 4B OS=Homo sapiens GN=VPS4B PE=1 SV=2
293	1	UniProt_human	P05023	242	112824	9	9	7	7	0.3	Sodium/potassium-transporting ATPase subunit alpha-1 OS=Homo sapiens GN=ATP1A1 PE=1 SV=1
294	1	UniProt_human	Q8NCA5	242	55366	7	7	3	3	0.26	Protein FAM98A OS=Homo sapiens GN=FAM98A PE=1 SV=1
295	1	UniProt_human	Q9UG54	242	28852	7	7	4	4	0.79	Mitogen-activated protein kinase kinase kinase 7 OS=Homo sapiens GN=DKFZp586F0420 PE=1 SV=1
133	3	UniProt_human	E9PD68	238	61991	9	9	5	5	0.51	Dihydropyrimidinase-related protein 1 OS=Homo sapiens GN=CRMP1 PE=1 SV=1
143	2	UniProt_human	P08237	238	85128	9	9	7	7	0.42	ATP-dependent 6-phosphofructokinase, muscle type OS=Homo sapiens GN=PFKM PE=1 SV=2
296	1	UniProt_human	Q8IWF2	237	77743	10	10	6	6	0.39	FAD-dependent oxidoreductase domain-containing protein 2 OS=Homo sapiens GN=FOXRED2 PE=1 SV=1
297	1	UniProt_human	E7ET49	236	68907	9	9	8	8	0.64	Sn1-specific diacylglycerol lipase beta OS=Homo sapiens GN=DAGLB PE=1 SV=1
298	1	UniProt_human	O95817	236	61557	11	11	7	7	0.62	BAG family molecular chaperone regulator 3 OS=Homo sapiens GN=BAG3 PE=1 SV=3
299	1	UniProt_human	J3QS41	234	218920	5	5	3	3	0.06	Probable helicase with zinc finger domain OS=Homo sapiens GN=HELZ PE=1 SV=1
300	1	UniProt_human	Q9UK59	234	61516	6	6	4	4	0.32	Lariat debranching enzyme OS=Homo sapiens GN=DBR1 PE=1 SV=2
301	1	UniProt_human	O00505	231	57775	4	4	3	3	0.25	Importin subunit alpha-4 OS=Homo sapiens GN=KPNA3 PE=1 SV=2
302	1	UniProt_human	Q9NVW2	231	68508	7	7	5	5	0.36	E3 ubiquitin-protein ligase RLIM OS=Homo sapiens GN=RLIM PE=1 SV=3
219	2	UniProt_human	O60684	230	59991	6	6	2	2	0.24	Importin subunit alpha-7 OS=Homo sapiens GN=KPNA6 PE=1 SV=1
303	1	UniProt_human	Q92625	230	123032	11	11	7	7	0.27	Ankyrin repeat and SAM domain-containing protein 1A OS=Homo sapiens GN=ANKS1A PE=1 SV=4
304	1	UniProt_human	J3QS39	229	10463	8	8	2	2	1.19	Polyubiquitin-B (Fragment) OS=Homo sapiens GN=UBB PE=1 SV=1
305	1	UniProt_human	A0A087WUV8	229	20529	8	8	4	4	1.26	Basigin OS=Homo sapiens GN=BSG PE=1 SV=1
306	1	UniProt_human	B4DDD6	229	45718	8	8	5	5	0.74	Drebrin-like protein OS=Homo sapiens GN=DBNL PE=1 SV=1
307	1	UniProt_human	Q9Y2V7-2	229	68368	9	9	7	7	0.54	Isoform 2 of Conserved oligomeric Golgi complex subunit 6 OS=Homo sapiens GN=COG6
308	1	UniProt_human	C9JRJ5	227	65493	6	6	4	4	0.38	LIM domain-containing protein 1 OS=Homo sapiens GN=LIMD1 PE=1 SV=1
309	1	UniProt_human	Q9UPY6	225	55259	7	7	3	3	0.26	Wiskott-Aldrich syndrome protein family member 3 OS=Homo sapiens GN=WASF3 PE=1 SV=2
310	1	UniProt_human	Q9H3P7	224	60556	6	6	3	3	0.23	Golgi resident protein GCP60 OS=Homo sapiens GN=ACBD3 PE=1 SV=4
311	1	UniProt_human	A0A0A6YYI3	223	58163	7	7	5	5	0.44	Protein PPAN-P2RY11 OS=Homo sapiens GN=PPAN-P2RY11 PE=4 SV=1
312	1	UniProt_human	O43143	223	90875	10	10	9	9	0.52	Pre-mRNA-splicing factor ATP-dependent RNA helicase DHX15 OS=Homo sapiens GN=DHX15 PE=1 SV=2
42	2	UniProt_human	Q9Y5V3	222	86107	10	10	8	8	0.48	Melanoma-associated antigen D1 OS=Homo sapiens GN=MAGED1 PE=1 SV=3
313	1	UniProt_human	Q13356	220	58787	6	6	3	3	0.24	Peptidyl-prolyl cis-trans isomerase-like 2 OS=Homo sapiens GN=PPIL2 PE=1 SV=1
314	1	UniProt_human	Q96ER3	220	53524	7	7	3	3	0.37	Protein SAAL1 OS=Homo sapiens GN=SAAL1 PE=1 SV=2
315	1	UniProt_human	O94927	220	71638	8	8	6	6	0.43	HAUS augmin-like complex subunit 5 OS=Homo sapiens GN=HAUS5 PE=1 SV=2
316	1	UniProt_human	P54646	219	62280	9	9	6	6	0.5	5'-AMP-activated protein kinase catalytic subunit alpha-2 OS=Homo sapiens GN=PRKAA2 PE=1 SV=2
317	1	UniProt_human	U3KQK0	218	18792	4	4	2	2	0.56	Histone H2B OS=Homo sapiens GN=HIST1H2BN PE=1 SV=1
318	1	UniProt_human	P33981	217	97011	8	8	6	6	0.3	Dual specificity protein kinase TTK OS=Homo sapiens GN=TTK PE=1 SV=2
319	1	UniProt_human	Q53GT1	217	71621	13	13	7	7	0.51	Kelch-like protein 22 OS=Homo sapiens GN=KLHL22 PE=1 SV=2
156	2	UniProt_human	P67809	216	35903	5	5	3	3	0.42	Nuclease-sensitive element-binding protein 1 OS=Homo sapiens GN=YBX1 PE=1 SV=3
320	1	UniProt_human	Q8TAT6	215	68077	6	6	5	5	0.37	Nuclear protein localization protein 4 homolog OS=Homo sapiens GN=NPLOC4 PE=1 SV=3
321	1	UniProt_human	F8VV52	214	58583	11	11	7	7	0.66	CCR4-NOT transcription complex subunit 2 (Fragment) OS=Homo sapiens GN=CNOT2 PE=1 SV=1
322	1	UniProt_human	Q8ND56	213	50499	8	8	6	6	0.65	Protein LSM14 homolog A OS=Homo sapiens GN=LSM14A PE=1 SV=3
323	1	UniProt_human	Q9BTE3-2	212	72703	12	12	8	8	0.59	Isoform 2 of Mini-chromosome maintenance complex-binding protein OS=Homo sapiens GN=MCMBP
324	1	UniProt_human	A0A0A0MSQ0	211	69291	7	7	5	5	0.36	Plastin-3 OS=Homo sapiens GN=PLS3 PE=1 SV=1
325	1	UniProt_human	Q4G0J3	210	66857	7	7	6	6	0.46	La-related protein 7 OS=Homo sapiens GN=LARP7 PE=1 SV=1
219	3	UniProt_human	O15131	209	60311	6	6	2	2	0.23	Importin subunit alpha-6 OS=Homo sapiens GN=KPNA5 PE=1 SV=2
326	1	UniProt_human	A0A0A0MSI8	209	82067	17	17	11	11	0.77	Exocyst complex component 5 OS=Homo sapiens GN=EXOC5 PE=1 SV=1
327	1	UniProt_human	C9JFE4	209	53338	13	13	8	8	0.88	COP9 signalosome complex subunit 1 OS=Homo sapiens GN=GPS1 PE=1 SV=2
328	1	UniProt_human	Q6L8Q7	209	67309	7	7	7	7	0.55	2',5'-phosphodiesterase 12 OS=Homo sapiens GN=PDE12 PE=1 SV=2
329	1	UniProt_human	Q9NV88	209	73767	8	8	5	5	0.33	Integrator complex subunit 9 OS=Homo sapiens GN=INTS9 PE=1 SV=2
330	1	UniProt_human	Q5T5C7	208	61274	7	7	3	3	0.23	Serine--tRNA ligase, cytoplasmic OS=Homo sapiens GN=SARS PE=1 SV=1
245	2	UniProt_human	Q9P2J3	207	69383	11	11	8	8	0.63	Kelch-like protein 9 OS=Homo sapiens GN=KLHL9 PE=1 SV=2
331	1	UniProt_human	Q5QP82	207	60544	6	6	5	5	0.42	DDB1- and CUL4-associated factor 10 OS=Homo sapiens GN=DCAF10 PE=1 SV=1
332	1	UniProt_human	O15228	206	77138	7	7	7	7	0.47	Dihydroxyacetone phosphate acyltransferase OS=Homo sapiens GN=GNPAT PE=1 SV=1
333	1	UniProt_human	Q8IYI6	205	81747	6	6	6	6	0.37	Exocyst complex component 8 OS=Homo sapiens GN=EXOC8 PE=1 SV=2
334	1	UniProt_human	P48163	205	64109	6	6	5	5	0.39	NADP-dependent malic enzyme OS=Homo sapiens GN=ME1 PE=1 SV=1
335	1	UniProt_human	H3BMT1	205	72741	9	9	7	7	0.5	RNA polymerase I-specific transcription initiation factor RRN3 OS=Homo sapiens GN=RRN3 PE=1 SV=1
336	1	UniProt_human	Q9H9A6	205	68207	11	11	9	9	0.75	Leucine-rich repeat-containing protein 40 OS=Homo sapiens GN=LRRC40 PE=1 SV=1
337	1	UniProt_human	Q14258	203	70928	9	9	6	6	0.43	E3 ubiquitin/ISG15 ligase TRIM25 OS=Homo sapiens GN=TRIM25 PE=1 SV=2
338	1	UniProt_human	Q15750	203	54610	7	7	5	5	0.47	TGF-beta-activated kinase 1 and MAP3K7-binding protein 1 OS=Homo sapiens GN=TAB1 PE=1 SV=1
339	1	UniProt_human	G3V325	202	84057	7	7	5	5	0.29	Protein ATP5J2-PTCD1 OS=Homo sapiens GN=ATP5J2-PTCD1 PE=4 SV=1
340	1	UniProt_human	Q5SWX8	202	51071	8	8	4	4	0.39	Protein odr-4 homolog OS=Homo sapiens GN=ODR4 PE=1 SV=1
341	1	UniProt_human	Q9C026	201	79126	8	8	6	6	0.46	E3 ubiquitin-protein ligase TRIM9 OS=Homo sapiens GN=TRIM9 PE=1 SV=1
342	1	UniProt_human	Q13322	200	67189	9	9	7	7	0.56	Growth factor receptor-bound protein 10 OS=Homo sapiens GN=GRB10 PE=1 SV=2
343	1	UniProt_human	P55081	199	51927	6	6	4	4	0.38	Microfibrillar-associated protein 1 OS=Homo sapiens GN=MFAP1 PE=1 SV=2
344	1	UniProt_human	Q7Z3B4	198	55401	7	7	6	6	0.58	Nucleoporin p54 OS=Homo sapiens GN=NUP54 PE=1 SV=2
345	1	UniProt_human	Q9BQ67	197	49388	6	6	4	4	0.41	Glutamate-rich WD repeat-containing protein 1 OS=Homo sapiens GN=GRWD1 PE=1 SV=1
346	1	UniProt_human	Q05932	196	64568	6	6	6	6	0.48	Folylpolyglutamate synthase, mitochondrial OS=Homo sapiens GN=FPGS PE=1 SV=3
347	1	UniProt_human	Q13042	195	71609	6	6	4	4	0.27	Cell division cycle protein 16 homolog OS=Homo sapiens GN=CDC16 PE=1 SV=2
348	1	UniProt_human	Q92598	194	96804	8	8	5	5	0.25	Heat shock protein 105 kDa OS=Homo sapiens GN=HSPH1 PE=1 SV=1
349	1	UniProt_human	D3DQ30	193	63140	8	8	5	5	0.4	HCG40295, isoform CRA_d OS=Homo sapiens GN=TTC39A PE=1 SV=1
350	1	UniProt_human	O43865	193	58913	4	4	3	3	0.24	Adenosylhomocysteinase 2 OS=Homo sapiens GN=AHCYL1 PE=1 SV=2
351	1	UniProt_human	Q14677	192	68216	7	7	6	6	0.45	Clathrin interactor 1 OS=Homo sapiens GN=CLINT1 PE=1 SV=1
352	1	UniProt_human	P31689	192	44839	8	8	4	4	0.46	DnaJ homolog subfamily A member 1 OS=Homo sapiens GN=DNAJA1 PE=1 SV=2
353	1	UniProt_human	H0YDU4	191	27731	7	7	5	5	1.13	Nucleolar protein 56 (Fragment) OS=Homo sapiens GN=NOP56 PE=1 SV=1
354	1	UniProt_human	E9PMH5	191	67470	6	6	5	5	0.37	Baculoviral IAP repeat-containing protein 2 OS=Homo sapiens GN=BIRC2 PE=1 SV=1
355	1	UniProt_human	Q96JK2	191	103899	12	12	8	8	0.39	DDB1- and CUL4-associated factor 5 OS=Homo sapiens GN=DCAF5 PE=1 SV=2
356	1	UniProt_human	J3KN66	191	67781	6	6	3	3	0.28	Torsin-1A-interacting protein 1 OS=Homo sapiens GN=TOR1AIP1 PE=1 SV=1
357	1	UniProt_human	Q5T3U5	189	161527	3	3	2	2	0.05	Multidrug resistance-associated protein 7 OS=Homo sapiens GN=ABCC10 PE=1 SV=1
69	3	UniProt_human	Q03252	187	69906	12	12	11	11	0.95	Lamin-B2 OS=Homo sapiens GN=LMNB2 PE=1 SV=4
358	1	UniProt_human	Q8NFJ9	187	65042	7	7	5	5	0.38	Bardet-Biedl syndrome 1 protein OS=Homo sapiens GN=BBS1 PE=1 SV=1
359	1	UniProt_human	O43592	187	109893	5	5	3	3	0.12	Exportin-T OS=Homo sapiens GN=XPOT PE=1 SV=2
360	1	UniProt_human	Q14674-2	187	197620	6	6	4	4	0.09	Isoform 2 of Separin OS=Homo sapiens GN=ESPL1
361	1	UniProt_human	D6RIY6	186	46948	6	6	4	4	0.43	Exosome complex component RRP45 OS=Homo sapiens GN=EXOSC9 PE=1 SV=1
362	1	UniProt_human	P78527	185	468788	10	10	9	9	0.09	DNA-dependent protein kinase catalytic subunit OS=Homo sapiens GN=PRKDC PE=1 SV=3
363	1	UniProt_human	Q9NXH9	185	72188	6	6	6	6	0.42	tRNA (guanine(26)-N(2))-dimethyltransferase OS=Homo sapiens GN=TRMT1 PE=1 SV=1
364	1	UniProt_human	Q86YP4	185	68021	6	6	4	4	0.28	Transcriptional repressor p66-alpha OS=Homo sapiens GN=GATAD2A PE=1 SV=1
365	1	UniProt_human	C9JZR2	184	104784	9	9	8	8	0.38	Catenin delta-1 OS=Homo sapiens GN=CTNND1 PE=1 SV=2
366	1	UniProt_human	Q5JVZ5	183	82312	9	9	7	7	0.51	Engulfment and cell motility protein 2 OS=Homo sapiens GN=ELMO2 PE=1 SV=1
367	1	UniProt_human	P52597	183	45643	5	5	3	3	0.32	Heterogeneous nuclear ribonucleoprotein F OS=Homo sapiens GN=HNRNPF PE=1 SV=3
368	1	UniProt_human	Q9H900	182	67172	6	6	4	4	0.37	Protein zwilch homolog OS=Homo sapiens GN=ZWILCH PE=1 SV=2
369	1	UniProt_human	Q6UN15	182	66487	8	8	6	6	0.47	Pre-mRNA 3'-end-processing factor FIP1 OS=Homo sapiens GN=FIP1L1 PE=1 SV=1
370	1	UniProt_human	A0A087WVQ6	181	191936	7	7	6	6	0.14	Clathrin heavy chain OS=Homo sapiens GN=CLTC PE=1 SV=1
371	1	UniProt_human	P19525	181	62056	7	7	6	6	0.51	Interferon-induced, double-stranded RNA-activated protein kinase OS=Homo sapiens GN=EIF2AK2 PE=1 SV=2
372	1	UniProt_human	Q9NPH2	181	61029	7	7	5	5	0.41	Inositol-3-phosphate synthase 1 OS=Homo sapiens GN=ISYNA1 PE=1 SV=1
373	1	UniProt_human	Q9HC07	180	34883	3	3	2	2	0.27	Transmembrane protein 165 OS=Homo sapiens GN=TMEM165 PE=1 SV=1
374	1	UniProt_human	A0A087WT27	179	49064	5	5	3	3	0.29	Phosphoacetylglucosamine mutase OS=Homo sapiens GN=PGM3 PE=1 SV=1
375	1	UniProt_human	Q96P70	179	115889	5	5	3	3	0.12	Importin-9 OS=Homo sapiens GN=IPO9 PE=1 SV=3
376	1	UniProt_human	Q10469	177	51517	7	7	4	4	0.39	Alpha-1,6-mannosyl-glycoprotein 2-beta-N-acetylglucosaminyltransferase OS=Homo sapiens GN=MGAT2 PE=1 SV=1
377	1	UniProt_human	F8W6G1	177	60792	6	6	4	4	0.32	Nuclear receptor-binding protein OS=Homo sapiens GN=NRBP1 PE=1 SV=1
378	1	UniProt_human	R4GNG2	176	33853	4	4	3	3	0.45	E3 ubiquitin-protein ligase AMFR (Fragment) OS=Homo sapiens GN=AMFR PE=1 SV=1
379	1	UniProt_human	A0A140T9T7	176	87121	3	3	3	3	0.16	Antigen peptide transporter 1 OS=Homo sapiens GN=TAP1 PE=1 SV=1
380	1	UniProt_human	O95674	175	51384	2	2	1	1	0.09	Phosphatidate cytidylyltransferase 2 OS=Homo sapiens GN=CDS2 PE=1 SV=1
381	1	UniProt_human	P54577	175	59106	10	10	8	8	0.77	Tyrosine--tRNA ligase, cytoplasmic OS=Homo sapiens GN=YARS PE=1 SV=4
382	1	UniProt_human	P43007	175	55688	7	7	4	4	0.35	Neutral amino acid transporter A OS=Homo sapiens GN=SLC1A4 PE=1 SV=1
2	11	UniProt_human	F6TDL0	174	59357	7	7	5	5	0.43	Phosphatidylinositol 3-kinase regulatory subunit gamma OS=Homo sapiens GN=PIK3R3 PE=1 SV=1
383	1	UniProt_human	Q15678	174	135175	10	10	8	8	0.29	Tyrosine-protein phosphatase non-receptor type 14 OS=Homo sapiens GN=PTPN14 PE=1 SV=2
384	1	UniProt_human	H3BPZ1	173	40043	8	8	5	5	0.69	Very-long-chain (3R)-3-hydroxyacyl-CoA dehydratase 3 OS=Homo sapiens GN=HACD3 PE=1 SV=1
385	1	UniProt_human	Q9Y2I8	172	54632	4	4	4	4	0.36	WD repeat-containing protein 37 OS=Homo sapiens GN=WDR37 PE=1 SV=2
386	1	UniProt_human	Q5T3I0	172	50351	5	5	3	3	0.29	G patch domain-containing protein 4 OS=Homo sapiens GN=GPATCH4 PE=1 SV=2
387	1	UniProt_human	Q0VDF9	172	54760	7	7	4	4	0.36	Heat shock 70 kDa protein 14 OS=Homo sapiens GN=HSPA14 PE=1 SV=1
388	1	UniProt_human	H0Y380	171	111124	5	5	3	3	0.12	Receptor-type tyrosine-protein phosphatase F (Fragment) OS=Homo sapiens GN=PTPRF PE=1 SV=1
389	1	UniProt_human	F8W726	171	113559	5	5	3	3	0.12	Ubiquitin-associated protein 2-like OS=Homo sapiens GN=UBAP2L PE=1 SV=2
390	1	UniProt_human	Q8TEB1	171	61631	7	7	6	6	0.51	DDB1- and CUL4-associated factor 11 OS=Homo sapiens GN=DCAF11 PE=1 SV=1
51	2	UniProt_human	Q8WWY3	170	55421	8	8	7	7	0.71	U4/U6 small nuclear ribonucleoprotein Prp31 OS=Homo sapiens GN=PRPF31 PE=1 SV=2
391	1	UniProt_human	A0A0C4DGU8	169	41709	6	6	4	4	0.5	F-box only protein 31 OS=Homo sapiens GN=FBXO31 PE=1 SV=1
204	2	UniProt_human	Q9H0B6	168	68892	9	9	6	6	0.45	Kinesin light chain 2 OS=Homo sapiens GN=KLC2 PE=1 SV=1
392	1	UniProt_human	O94826	168	67412	10	10	5	5	0.37	Mitochondrial import receptor subunit TOM70 OS=Homo sapiens GN=TOMM70 PE=1 SV=1
393	1	UniProt_human	Q9ULM6	168	63266	6	6	4	4	0.31	CCR4-NOT transcription complex subunit 6 OS=Homo sapiens GN=CNOT6 PE=1 SV=2
394	1	UniProt_human	B0QZ18	168	59680	6	6	5	5	0.43	Copine-1 OS=Homo sapiens GN=CPNE1 PE=1 SV=1
367	2	UniProt_human	E9PCY7	167	47057	6	6	4	4	0.43	Heterogeneous nuclear ribonucleoprotein H OS=Homo sapiens GN=HNRNPH1 PE=1 SV=1
395	1	UniProt_human	J3KP15	167	15362	4	4	3	3	1.25	Serine/arginine-rich-splicing factor 2 (Fragment) OS=Homo sapiens GN=SRSF2 PE=1 SV=8
396	1	UniProt_human	E7EN32	167	61381	5	5	4	4	0.32	Menin OS=Homo sapiens GN=MEN1 PE=1 SV=1
397	1	UniProt_human	Q9UQB8	166	60830	5	5	4	4	0.32	Brain-specific angiogenesis inhibitor 1-associated protein 2 OS=Homo sapiens GN=BAIAP2 PE=1 SV=1
398	1	UniProt_human	Q96JX3	166	74100	11	11	7	7	0.49	Protein SERAC1 OS=Homo sapiens GN=SERAC1 PE=1 SV=1
399	1	UniProt_human	Q06210	166	78756	4	4	4	4	0.24	Glutamine--fructose-6-phosphate aminotransferase [isomerizing] 1 OS=Homo sapiens GN=GFPT1 PE=1 SV=3
400	1	UniProt_human	Q9UJA5	166	55764	5	5	4	4	0.35	tRNA (adenine(58)-N(1))-methyltransferase non-catalytic subunit TRM6 OS=Homo sapiens GN=TRMT6 PE=1 SV=1
401	1	UniProt_human	Q13123	166	65562	7	7	4	4	0.29	Protein Red OS=Homo sapiens GN=IK PE=1 SV=3
402	1	UniProt_human	Q8WU90	166	48573	6	6	4	4	0.42	Zinc finger CCCH domain-containing protein 15 OS=Homo sapiens GN=ZC3H15 PE=1 SV=1
316	2	UniProt_human	Q13131	164	63969	9	9	4	4	0.3	5'-AMP-activated protein kinase catalytic subunit alpha-1 OS=Homo sapiens GN=PRKAA1 PE=1 SV=4
403	1	UniProt_human	P56192	163	101052	7	7	5	5	0.23	Methionine--tRNA ligase, cytoplasmic OS=Homo sapiens GN=MARS PE=1 SV=2
404	1	UniProt_human	Q96PZ0	163	74988	7	7	5	5	0.33	Pseudouridylate synthase 7 homolog OS=Homo sapiens GN=PUS7 PE=1 SV=2
405	1	UniProt_human	P46977	163	80477	9	9	5	5	0.3	Dolichyl-diphosphooligosaccharide--protein glycosyltransferase subunit STT3A OS=Homo sapiens GN=STT3A PE=1 SV=2
406	1	UniProt_human	B4DXZ6	163	68285	6	6	5	5	0.36	Fragile X mental retardation syndrome-related protein 1 OS=Homo sapiens GN=FXR1 PE=1 SV=1
407	1	UniProt_human	A0A0C4DGN6	163	83080	8	8	7	7	0.43	ARF GTPase-activating protein GIT1 OS=Homo sapiens GN=GIT1 PE=1 SV=1
408	1	UniProt_human	O94925	162	73414	4	4	4	4	0.26	Glutaminase kidney isoform, mitochondrial OS=Homo sapiens GN=GLS PE=1 SV=1
409	1	UniProt_human	Q96NL6	161	80861	7	7	7	7	0.44	Sodium channel and clathrin linker 1 OS=Homo sapiens GN=SCLT1 PE=1 SV=2
410	1	UniProt_human	Q9H0W8	161	57614	4	4	4	4	0.34	Protein SMG9 OS=Homo sapiens GN=SMG9 PE=1 SV=1
411	1	UniProt_human	P07814	161	170483	6	6	4	4	0.1	Bifunctional glutamate/proline--tRNA ligase OS=Homo sapiens GN=EPRS PE=1 SV=5
412	1	UniProt_human	Q96BP3	161	73528	10	10	7	7	0.5	Peptidylprolyl isomerase domain and WD repeat-containing protein 1 OS=Homo sapiens GN=PPWD1 PE=1 SV=1
413	1	UniProt_human	F5H6Z0	160	53500	12	12	9	9	1.04	Cyclin-dependent kinase 17 OS=Homo sapiens GN=CDK17 PE=1 SV=1
414	1	UniProt_human	G5E9X5	160	48185	3	3	3	3	0.3	Methylcrotonoyl-CoA carboxylase subunit alpha, mitochondrial OS=Homo sapiens GN=MCCC1 PE=1 SV=1
413	2	UniProt_human	P12931	159	59797	6	6	5	5	0.42	Proto-oncogene tyrosine-protein kinase Src OS=Homo sapiens GN=SRC PE=1 SV=3
415	1	UniProt_human	F5H0F9	159	83622	9	9	8	8	0.5	Anaphase-promoting complex subunit 5 OS=Homo sapiens GN=ANAPC5 PE=1 SV=1
416	1	UniProt_human	Q96RF0	157	68851	8	8	5	5	0.36	Sorting nexin-18 OS=Homo sapiens GN=SNX18 PE=1 SV=2
417	1	UniProt_human	P13667	157	72887	6	6	4	4	0.26	Protein disulfide-isomerase A4 OS=Homo sapiens GN=PDIA4 PE=1 SV=2
418	1	UniProt_human	J3QSV6	156	48179	7	7	6	6	0.69	Ribosomal L1 domain-containing protein 1 (Fragment) OS=Homo sapiens GN=RSL1D1 PE=1 SV=1
419	1	UniProt_human	H0YHA7	156	18962	3	3	2	2	0.55	60S ribosomal protein L18 (Fragment) OS=Homo sapiens GN=RPL18 PE=1 SV=1
420	1	UniProt_human	Q9BYT3-2	156	50144	4	4	3	3	0.4	Isoform 2 of Serine/threonine-protein kinase 33 OS=Homo sapiens GN=STK33
421	1	UniProt_human	Q9H7D7	155	72079	6	6	3	3	0.19	WD repeat-containing protein 26 OS=Homo sapiens GN=WDR26 PE=1 SV=3
422	1	UniProt_human	Q13501	155	47657	3	3	2	2	0.19	Sequestosome-1 OS=Homo sapiens GN=SQSTM1 PE=1 SV=1
423	1	UniProt_human	Q7Z2W4	154	101367	3	3	3	3	0.13	Zinc finger CCCH-type antiviral protein 1 OS=Homo sapiens GN=ZC3HAV1 PE=1 SV=3
424	1	UniProt_human	Q9NZ01	154	36011	4	4	2	2	0.26	Very-long-chain enoyl-CoA reductase OS=Homo sapiens GN=TECR PE=1 SV=1
425	1	UniProt_human	B7Z6Q0	154	60753	4	4	3	3	0.23	Nitrogen permease regulator 3-like protein OS=Homo sapiens GN=NPRL3 PE=1 SV=1
426	1	UniProt_human	P13674	153	61011	6	6	5	5	0.41	Prolyl 4-hydroxylase subunit alpha-1 OS=Homo sapiens GN=P4HA1 PE=1 SV=2
427	1	UniProt_human	A0A0D9SEU5	153	67213	5	5	3	3	0.21	Ran-binding protein 10 OS=Homo sapiens GN=RANBP10 PE=1 SV=1
428	1	UniProt_human	Q8NAT1	153	66573	7	7	6	6	0.46	Protein O-linked-mannose beta-1,4-N-acetylglucosaminyltransferase 2 OS=Homo sapiens GN=POMGNT2 PE=1 SV=1
429	1	UniProt_human	Q9NWK9	152	53884	5	5	4	4	0.37	Box C/D snoRNA protein 1 OS=Homo sapiens GN=ZNHIT6 PE=1 SV=1
430	1	UniProt_human	P13639	152	95277	6	6	5	5	0.25	Elongation factor 2 OS=Homo sapiens GN=EEF2 PE=1 SV=4
431	1	UniProt_human	Q6P1J9	152	60539	9	9	8	8	0.75	Parafibromin OS=Homo sapiens GN=CDC73 PE=1 SV=1
432	1	UniProt_human	Q92733	150	52386	3	3	2	2	0.18	Proline-rich protein PRCC OS=Homo sapiens GN=PRCC PE=1 SV=1
433	1	UniProt_human	A0A0G2JLB3	150	59625	7	7	5	5	0.43	Glucosylceramidase OS=Homo sapiens GN=GBA PE=1 SV=1
434	1	UniProt_human	P55884	150	92424	4	4	4	4	0.2	Eukaryotic translation initiation factor 3 subunit B OS=Homo sapiens GN=EIF3B PE=1 SV=3
435	1	UniProt_human	P33897	149	82884	4	4	3	3	0.17	ATP-binding cassette sub-family D member 1 OS=Homo sapiens GN=ABCD1 PE=1 SV=2
436	1	UniProt_human	D6REB4	149	39883	3	3	2	2	0.24	Polyadenylate-binding protein-interacting protein 1 OS=Homo sapiens GN=PAIP1 PE=1 SV=1
437	1	UniProt_human	Q8IWF6	149	69530	8	8	4	4	0.28	Protein DENND6A OS=Homo sapiens GN=DENND6A PE=1 SV=1
438	1	UniProt_human	K7EJP1	148	15258	3	3	3	3	1.27	ATP synthase subunit alpha, mitochondrial (Fragment) OS=Homo sapiens GN=ATP5A1 PE=1 SV=8
439	1	UniProt_human	A0A087WTP3	148	72982	5	5	5	5	0.34	Far upstream element-binding protein 2 OS=Homo sapiens GN=KHSRP PE=1 SV=1
440	1	UniProt_human	H0Y4R2	148	81643	8	8	6	6	0.37	NADPH--cytochrome P450 reductase (Fragment) OS=Homo sapiens GN=POR PE=1 SV=1
441	1	UniProt_human	Q8NA72	147	63312	4	4	4	4	0.31	Centrosomal protein POC5 OS=Homo sapiens GN=POC5 PE=1 SV=2
442	1	UniProt_human	Q92917	147	52197	3	3	3	3	0.28	G patch domain and KOW motifs-containing protein OS=Homo sapiens GN=GPKOW PE=1 SV=2
443	1	UniProt_human	Q6DN90	146	108247	2	2	2	2	0.08	IQ motif and SEC7 domain-containing protein 1 OS=Homo sapiens GN=IQSEC1 PE=1 SV=1
444	1	UniProt_human	G8JLD5	146	79572	4	4	4	4	0.24	Dynamin-1-like protein OS=Homo sapiens GN=DNM1L PE=1 SV=1
445	1	UniProt_human	Q99638	146	42520	3	3	3	3	0.35	Cell cycle checkpoint control protein RAD9A OS=Homo sapiens GN=RAD9A PE=1 SV=1
446	1	UniProt_human	F8W7S1	146	71088	5	5	5	5	0.35	Mitoguardin-1 OS=Homo sapiens GN=MIGA1 PE=1 SV=2
447	1	UniProt_human	Q9BW19	144	73702	4	4	4	4	0.26	Kinesin-like protein KIFC1 OS=Homo sapiens GN=KIFC1 PE=1 SV=2
448	1	UniProt_human	P46821	144	270468	11	11	6	6	0.1	Microtubule-associated protein 1B OS=Homo sapiens GN=MAP1B PE=1 SV=2
449	1	UniProt_human	A0A075B7G8	143	76662	7	7	4	4	0.25	Amyloid beta A4 precursor protein-binding family B member 1 OS=Homo sapiens GN=APBB1 PE=1 SV=7
450	1	UniProt_human	P49321	143	85186	3	3	3	3	0.16	Nuclear autoantigenic sperm protein OS=Homo sapiens GN=NASP PE=1 SV=2
451	1	UniProt_human	A0A0D9SF70	143	42127	2	2	2	2	0.22	ADP-ribosylation factor GTPase-activating protein 2 OS=Homo sapiens GN=ARFGAP2 PE=1 SV=1
452	1	UniProt_human	Q12800	143	57220	3	3	2	2	0.16	Alpha-globin transcription factor CP2 OS=Homo sapiens GN=TFCP2 PE=1 SV=2
453	1	UniProt_human	O76094	143	74560	4	4	3	3	0.19	Signal recognition particle subunit SRP72 OS=Homo sapiens GN=SRP72 PE=1 SV=3
454	1	UniProt_human	Q00839	143	90528	4	4	4	4	0.21	Heterogeneous nuclear ribonucleoprotein U OS=Homo sapiens GN=HNRNPU PE=1 SV=6
455	1	UniProt_human	Q96EX3	143	57764	5	5	3	3	0.25	WD repeat-containing protein 34 OS=Homo sapiens GN=WDR34 PE=1 SV=2
283	2	UniProt_human	A0A024R571	142	61888	5	5	4	4	0.31	EH domain-containing protein 1 OS=Homo sapiens GN=EHD1 PE=1 SV=1
456	1	UniProt_human	Q8NC51	142	44938	6	6	4	4	0.46	Plasminogen activator inhibitor 1 RNA-binding protein OS=Homo sapiens GN=SERBP1 PE=1 SV=2
457	1	UniProt_human	A0FGR8-2	142	98840	6	6	6	6	0.29	Isoform 2 of Extended synaptotagmin-2 OS=Homo sapiens GN=ESYT2
458	1	UniProt_human	Q15904	141	51993	5	5	5	5	0.5	V-type proton ATPase subunit S1 OS=Homo sapiens GN=ATP6AP1 PE=1 SV=2
459	1	UniProt_human	P53618	141	107074	6	6	5	5	0.22	Coatomer subunit beta OS=Homo sapiens GN=COPB1 PE=1 SV=3
460	1	UniProt_human	O00629	141	57851	3	3	2	2	0.16	Importin subunit alpha-3 OS=Homo sapiens GN=KPNA4 PE=1 SV=1
461	1	UniProt_human	O43572	140	73772	7	7	6	6	0.41	A-kinase anchor protein 10, mitochondrial OS=Homo sapiens GN=AKAP10 PE=1 SV=2
462	1	UniProt_human	B0QYK0	140	64889	3	3	2	2	0.14	RNA-binding protein EWS OS=Homo sapiens GN=EWSR1 PE=1 SV=1
292	2	UniProt_human	Q6PIW4	139	74030	8	8	3	3	0.19	Fidgetin-like protein 1 OS=Homo sapiens GN=FIGNL1 PE=1 SV=2
463	1	UniProt_human	Q7Z4Q2	139	74535	7	7	6	6	0.41	HEAT repeat-containing protein 3 OS=Homo sapiens GN=HEATR3 PE=1 SV=2
464	1	UniProt_human	H0YBP1	139	115488	10	10	7	7	0.29	Focal adhesion kinase 1 (Fragment) OS=Homo sapiens GN=PTK2 PE=1 SV=1
465	1	UniProt_human	P49411	138	49510	4	4	3	3	0.29	Elongation factor Tu, mitochondrial OS=Homo sapiens GN=TUFM PE=1 SV=2
466	1	UniProt_human	E9PIN3	138	68065	4	4	3	3	0.21	Nuclear RNA export factor 1 (Fragment) OS=Homo sapiens GN=NXF1 PE=1 SV=1
467	1	UniProt_human	Q6UVJ0	138	74351	2	2	2	2	0.12	Spindle assembly abnormal protein 6 homolog OS=Homo sapiens GN=SASS6 PE=1 SV=1
468	1	UniProt_human	Q9NYH9	138	70149	6	6	4	4	0.27	U3 small nucleolar RNA-associated protein 6 homolog OS=Homo sapiens GN=UTP6 PE=2 SV=2
469	1	UniProt_human	Q8NBJ5	138	71590	10	10	7	7	0.51	Procollagen galactosyltransferase 1 OS=Homo sapiens GN=COLGALT1 PE=1 SV=1
470	1	UniProt_human	Q8IV08	136	54671	5	5	3	3	0.26	Phospholipase D3 OS=Homo sapiens GN=PLD3 PE=1 SV=1
471	1	UniProt_human	I3L112	136	51179	7	7	4	4	0.39	Diacylglycerol kinase (Fragment) OS=Homo sapiens GN=DGKE PE=1 SV=1
472	1	UniProt_human	A0A0C4DFW9	136	47666	4	4	3	3	0.43	Cellular tumor antigen p53 OS=Homo sapiens GN=TP73 PE=1 SV=1
138	2	UniProt_human	O60488	135	79137	6	6	3	3	0.17	Long-chain-fatty-acid--CoA ligase 4 OS=Homo sapiens GN=ACSL4 PE=1 SV=2
473	1	UniProt_human	B4DR12	135	36159	5	5	3	3	0.42	E3 ubiquitin-protein ligase MGRN1 OS=Homo sapiens GN=MGRN1 PE=1 SV=1
474	1	UniProt_human	Q10471	135	64691	7	7	5	5	0.39	Polypeptide N-acetylgalactosaminyltransferase 2 OS=Homo sapiens GN=GALNT2 PE=1 SV=1
475	1	UniProt_human	O14545	134	64800	3	3	2	2	0.14	TRAF-type zinc finger domain-containing protein 1 OS=Homo sapiens GN=TRAFD1 PE=1 SV=1
476	1	UniProt_human	P40222	133	61853	4	4	4	4	0.32	Alpha-taxilin OS=Homo sapiens GN=TXLNA PE=1 SV=3
477	1	UniProt_human	A0A075B6T1	133	129519	2	2	2	2	0.07	Activating molecule in BECN1-regulated autophagy protein 1 OS=Homo sapiens GN=AMBRA1 PE=1 SV=1
478	1	UniProt_human	O60701	133	54989	6	6	4	4	0.36	UDP-glucose 6-dehydrogenase OS=Homo sapiens GN=UGDH PE=1 SV=1
479	1	UniProt_human	Q9UEW8	132	59436	6	6	4	4	0.33	STE20/SPS1-related proline-alanine-rich protein kinase OS=Homo sapiens GN=STK39 PE=1 SV=3
480	1	UniProt_human	Q8NC54	131	29217	6	6	3	3	0.54	Keratinocyte-associated transmembrane protein 2 OS=Homo sapiens GN=KCT2 PE=1 SV=2
481	1	UniProt_human	H3BQ10	131	16785	2	2	2	2	0.64	3-phosphoinositide-dependent protein kinase 1 (Fragment) OS=Homo sapiens GN=PDPK1 PE=1 SV=1
482	1	UniProt_human	B7Z637	131	67142	4	4	3	3	0.21	Armadillo repeat containing 8, isoform CRA_g OS=Homo sapiens GN=ARMC8 PE=1 SV=1
483	1	UniProt_human	H3BMM5	131	61200	3	3	2	2	0.15	Uncharacterized protein OS=Homo sapiens PE=3 SV=1
484	1	UniProt_human	H0Y8C6	130	123779	2	2	1	1	0.03	Importin-5 (Fragment) OS=Homo sapiens GN=IPO5 PE=1 SV=1
485	1	UniProt_human	P23368	130	65402	4	4	3	3	0.21	NAD-dependent malic enzyme, mitochondrial OS=Homo sapiens GN=ME2 PE=1 SV=1
486	1	UniProt_human	O95391	130	68344	6	6	4	4	0.28	Pre-mRNA-splicing factor SLU7 OS=Homo sapiens GN=SLU7 PE=1 SV=2
487	1	UniProt_human	H0YFV6	130	36130	4	4	3	3	0.42	N6-adenosine-methyltransferase 70 kDa subunit (Fragment) OS=Homo sapiens GN=METTL3 PE=1 SV=2
488	1	UniProt_human	H0Y7A5	130	35215	5	5	4	4	0.61	GTP-binding protein 2 (Fragment) OS=Homo sapiens GN=GTPBP2 PE=1 SV=8
489	1	UniProt_human	Q9NWQ8	129	46951	4	4	4	4	0.43	Phosphoprotein associated with glycosphingolipid-enriched microdomains 1 OS=Homo sapiens GN=PAG1 PE=1 SV=2
490	1	UniProt_human	E7EQ29	129	60445	3	3	2	2	0.15	Beta-galactosidase OS=Homo sapiens GN=GLB1 PE=1 SV=1
271	2	UniProt_human	Q9NUT2	128	79938	4	4	4	4	0.24	ATP-binding cassette sub-family B member 8, mitochondrial OS=Homo sapiens GN=ABCB8 PE=1 SV=3
491	1	UniProt_human	Q8NCE0	128	53213	6	6	5	5	0.49	tRNA-splicing endonuclease subunit Sen2 OS=Homo sapiens GN=TSEN2 PE=1 SV=2
492	1	UniProt_human	P16615	127	114683	5	5	5	5	0.2	Sarcoplasmic/endoplasmic reticulum calcium ATPase 2 OS=Homo sapiens GN=ATP2A2 PE=1 SV=1
493	1	UniProt_human	A0A087WWI4	127	75143	2	2	2	2	0.12	Hypoxia up-regulated protein 1 OS=Homo sapiens GN=HYOU1 PE=1 SV=1
494	1	UniProt_human	Q9Y450	127	75426	5	5	4	4	0.25	HBS1-like protein OS=Homo sapiens GN=HBS1L PE=1 SV=1
495	1	UniProt_human	H0YD93	127	71390	4	4	3	3	0.19	RUN and FYVE domain-containing protein 2 (Fragment) OS=Homo sapiens GN=RUFY2 PE=1 SV=1
496	1	UniProt_human	Q93063	126	82202	2	2	1	1	0.05	Exostosin-2 OS=Homo sapiens GN=EXT2 PE=1 SV=1
497	1	UniProt_human	Q15650	126	66105	4	4	4	4	0.29	Activating signal cointegrator 1 OS=Homo sapiens GN=TRIP4 PE=1 SV=4
498	1	UniProt_human	Q8N1N4	125	56830	4	4	3	3	0.25	Keratin, type II cytoskeletal 78 OS=Homo sapiens GN=KRT78 PE=2 SV=2
499	1	UniProt_human	P60709	124	41710	6	6	5	5	0.66	Actin, cytoplasmic 1 OS=Homo sapiens GN=ACTB PE=1 SV=1
500	1	UniProt_human	Q9ULX6	124	71604	9	9	3	3	0.27	A-kinase anchor protein 8-like OS=Homo sapiens GN=AKAP8L PE=1 SV=3
501	1	UniProt_human	Q13948	124	77408	5	5	4	4	0.25	Protein CASP OS=Homo sapiens GN=CUX1 PE=1 SV=2
502	1	UniProt_human	Q6NSI4	124	97493	7	7	6	6	0.3	Uncharacterized protein CXorf57 OS=Homo sapiens GN=CXorf57 PE=1 SV=2
503	1	UniProt_human	H7C463	123	68134	6	6	5	5	0.36	MICOS complex subunit MIC60 (Fragment) OS=Homo sapiens GN=IMMT PE=1 SV=1
504	1	UniProt_human	A0A0A0MS52	123	60164	8	8	5	5	0.42	Calcium/calmodulin-dependent protein kinase (CaM kinase) II gamma, isoform CRA_a OS=Homo sapiens GN=CAMK2G PE=1 SV=1
505	1	UniProt_human	O75886	123	58128	4	4	4	4	0.34	Signal transducing adapter molecule 2 OS=Homo sapiens GN=STAM2 PE=1 SV=1
506	1	UniProt_human	Q96HU1	123	85300	2	2	2	2	0.1	Small G protein signaling modulator 3 OS=Homo sapiens GN=SGSM3 PE=1 SV=1
2	12	UniProt_human	B0YJC4	122	49623	6	6	5	5	0.53	Vimentin OS=Homo sapiens GN=VIM PE=1 SV=1
507	1	UniProt_human	O60832	122	57638	6	6	4	4	0.34	H/ACA ribonucleoprotein complex subunit 4 OS=Homo sapiens GN=DKC1 PE=1 SV=3
508	1	UniProt_human	Q5T985	122	105150	2	2	1	1	0.04	Inter-alpha-trypsin inhibitor heavy chain H2 OS=Homo sapiens GN=ITIH2 PE=1 SV=1
509	1	UniProt_human	Q8N122	122	148942	5	5	4	4	0.12	Regulatory-associated protein of mTOR OS=Homo sapiens GN=RPTOR PE=1 SV=1
510	1	UniProt_human	H0YJH9	122	11076	3	3	2	2	1.1	Polyadenylate-binding protein 2 (Fragment) OS=Homo sapiens GN=PABPN1 PE=1 SV=1
511	1	UniProt_human	Q9Y5X1	122	66550	3	3	3	3	0.21	Sorting nexin-9 OS=Homo sapiens GN=SNX9 PE=1 SV=1
512	1	UniProt_human	B7Z3Z9	121	58548	6	6	5	5	0.44	Long-chain-fatty-acid--CoA ligase 1 OS=Homo sapiens GN=ACSL1 PE=1 SV=1
513	1	UniProt_human	Q6GPH6	121	63354	4	4	3	3	0.22	Inositol 1,4,5-trisphosphate receptor-interacting protein-like 1 OS=Homo sapiens GN=ITPRIPL1 PE=1 SV=1
514	1	UniProt_human	Q5JY65	121	99111	3	3	3	3	0.14	Crooked neck-like protein 1 OS=Homo sapiens GN=CRNKL1 PE=1 SV=1
515	1	UniProt_human	H3BS42	120	56633	5	5	4	4	0.35	Zinc finger protein 768 OS=Homo sapiens GN=ZNF768 PE=1 SV=2
516	1	UniProt_human	A0A0G2JQ62	119	54438	1	1	1	1	0.08	Lysophosphatidylcholine acyltransferase 1 (Fragment) OS=Homo sapiens GN=LPCAT1 PE=1 SV=1
517	1	UniProt_human	K7ERA3	119	25969	3	3	2	2	0.38	Synaptonemal complex protein SC65 (Fragment) OS=Homo sapiens GN=P3H4 PE=1 SV=1
518	1	UniProt_human	Q9UHD8	118	65361	8	8	4	4	0.3	Septin-9 OS=Homo sapiens GN=SEPT9 PE=1 SV=2
519	1	UniProt_human	Q8IVW6	117	60600	4	4	4	4	0.32	AT-rich interactive domain-containing protein 3B OS=Homo sapiens GN=ARID3B PE=1 SV=2
520	1	UniProt_human	Q14974	117	97108	2	2	2	2	0.09	Importin subunit beta-1 OS=Homo sapiens GN=KPNB1 PE=1 SV=2
521	1	UniProt_human	A0A087X0R7	117	61239	2	2	1	1	0.07	Protein SENP3-EIF4A1 (Fragment) OS=Homo sapiens GN=SENP3-EIF4A1 PE=4 SV=1
522	1	UniProt_human	Q96RE7	117	57222	3	3	3	3	0.25	Nucleus accumbens-associated protein 1 OS=Homo sapiens GN=NACC1 PE=1 SV=1
523	1	UniProt_human	Q13610	117	55793	5	5	3	3	0.26	Periodic tryptophan protein 1 homolog OS=Homo sapiens GN=PWP1 PE=1 SV=1
524	1	UniProt_human	E9PPJ0	116	98109	3	3	2	2	0.09	Splicing factor 3B subunit 2 OS=Homo sapiens GN=SF3B2 PE=1 SV=1
525	1	UniProt_human	P31939	116	64575	4	4	3	3	0.22	Bifunctional purine biosynthesis protein PURH OS=Homo sapiens GN=ATIC PE=1 SV=3
526	1	UniProt_human	Q9UL54-2	116	119207	3	3	2	2	0.07	Isoform 2 of Serine/threonine-protein kinase TAO2 OS=Homo sapiens GN=TAOK2
527	1	UniProt_human	F5H5U2	116	65149	2	2	2	2	0.14	ATP-dependent RNA helicase DDX55 OS=Homo sapiens GN=DDX55 PE=1 SV=1
528	1	UniProt_human	Q8N584	115	65828	5	5	3	3	0.21	Tetratricopeptide repeat protein 39C OS=Homo sapiens GN=TTC39C PE=2 SV=2
529	1	UniProt_human	O15460	115	60864	2	2	1	1	0.07	Prolyl 4-hydroxylase subunit alpha-2 OS=Homo sapiens GN=P4HA2 PE=1 SV=1
530	1	UniProt_human	Q71RC2-7	114	49920	2	2	2	2	0.18	Isoform 7 of La-related protein 4 OS=Homo sapiens GN=LARP4
531	1	UniProt_human	P09874	114	113012	4	4	3	3	0.12	Poly [ADP-ribose] polymerase 1 OS=Homo sapiens GN=PARP1 PE=1 SV=4
532	1	UniProt_human	Q13049	114	71942	4	4	4	4	0.27	E3 ubiquitin-protein ligase TRIM32 OS=Homo sapiens GN=TRIM32 PE=1 SV=2
533	1	UniProt_human	P56181-2	114	50953	3	3	2	2	0.18	Isoform 2 of NADH dehydrogenase [ubiquinone] flavoprotein 3, mitochondrial OS=Homo sapiens GN=NDUFV3
534	1	UniProt_human	A0A0D9SF25	114	12955	2	2	2	2	0.89	F-box-like/WD repeat-containing protein TBL1XR1 (Fragment) OS=Homo sapiens GN=TBL1XR1 PE=1 SV=1
535	1	UniProt_human	Q70EL1	114	187271	1	1	1	1	0.02	Inactive ubiquitin carboxyl-terminal hydrolase 54 OS=Homo sapiens GN=USP54 PE=1 SV=4
89	3	UniProt_human	Q9BYJ9	113	60836	4	4	3	3	0.23	YTH domain-containing family protein 1 OS=Homo sapiens GN=YTHDF1 PE=1 SV=1
536	1	UniProt_human	F8VPD4	113	235873	3	3	3	3	0.06	CAD protein OS=Homo sapiens GN=CAD PE=1 SV=1
537	1	UniProt_human	E9PC15	113	43770	2	2	2	2	0.21	Acylglycerol kinase, mitochondrial OS=Homo sapiens GN=AGK PE=1 SV=1
538	1	UniProt_human	B3KNX7	112	58166	3	3	2	2	0.16	Serine/threonine-protein kinase PAK 1 OS=Homo sapiens GN=PAK1 PE=1 SV=1
539	1	UniProt_human	H0YHE2	112	73432	5	5	5	5	0.33	Intraflagellar transport protein 81 homolog (Fragment) OS=Homo sapiens GN=IFT81 PE=1 SV=1
540	1	UniProt_human	Q9UNY4	112	129508	2	2	2	2	0.07	Transcription termination factor 2 OS=Homo sapiens GN=TTF2 PE=1 SV=2
541	1	UniProt_human	O95671	112	68813	7	7	5	5	0.36	N-acetylserotonin O-methyltransferase-like protein OS=Homo sapiens GN=ASMTL PE=1 SV=3
542	1	UniProt_human	H3BRL0	111	74581	5	5	3	3	0.19	Bardet-Biedl syndrome 2 protein homolog OS=Homo sapiens GN=BBS2 PE=1 SV=1
543	1	UniProt_human	Q9Y383	111	46486	3	3	2	2	0.2	Putative RNA-binding protein Luc7-like 2 OS=Homo sapiens GN=LUC7L2 PE=1 SV=2
544	1	UniProt_human	Q9Y4R8	110	91689	6	6	5	5	0.26	Telomere length regulation protein TEL2 homolog OS=Homo sapiens GN=TELO2 PE=1 SV=2
545	1	UniProt_human	Q9Y608	110	82121	2	2	2	2	0.11	Leucine-rich repeat flightless-interacting protein 2 OS=Homo sapiens GN=LRRFIP2 PE=1 SV=1
546	1	UniProt_human	J3KN32	110	53295	5	5	3	3	0.27	REST corepressor 1 OS=Homo sapiens GN=RCOR1 PE=1 SV=1
547	1	UniProt_human	A0A0A0MR09	109	66911	4	4	4	4	0.29	Tyrosine-protein phosphatase non-receptor type 9 OS=Homo sapiens GN=PTPN9 PE=1 SV=1
548	1	UniProt_human	P14635	109	48306	4	4	3	3	0.3	G2/mitotic-specific cyclin-B1 OS=Homo sapiens GN=CCNB1 PE=1 SV=1
549	1	UniProt_human	Q7Z736	109	85264	2	2	2	2	0.1	Pleckstrin homology domain-containing family H member 3 OS=Homo sapiens GN=PLEKHH3 PE=1 SV=2
550	1	UniProt_human	H0YL43	108	17709	2	2	2	2	0.6	Reticulocalbin-2 (Fragment) OS=Homo sapiens GN=RCN2 PE=1 SV=1
551	1	UniProt_human	Q14126	108	122218	2	2	2	2	0.07	Desmoglein-2 OS=Homo sapiens GN=DSG2 PE=1 SV=2
552	1	UniProt_human	Q02790	108	51772	4	4	3	3	0.28	Peptidyl-prolyl cis-trans isomerase FKBP4 OS=Homo sapiens GN=FKBP4 PE=1 SV=3
65	4	UniProt_human	Q8IWB1	107	62019	5	5	4	4	0.31	Inositol 1,4,5-trisphosphate receptor-interacting protein OS=Homo sapiens GN=ITPRIP PE=1 SV=1
553	1	UniProt_human	P41743	107	68218	2	2	1	1	0.06	Protein kinase C iota type OS=Homo sapiens GN=PRKCI PE=1 SV=2
554	1	UniProt_human	H3BQV3	106	60400	2	2	2	2	0.15	Conserved oligomeric Golgi complex subunit 8 OS=Homo sapiens GN=COG8 PE=1 SV=1
555	1	UniProt_human	P43405	106	72020	4	4	3	3	0.19	Tyrosine-protein kinase SYK OS=Homo sapiens GN=SYK PE=1 SV=1
556	1	UniProt_human	H0Y650	106	72538	5	5	4	4	0.26	Dynein assembly factor 5, axonemal (Fragment) OS=Homo sapiens GN=DNAAF5 PE=1 SV=1
557	1	UniProt_human	O15287	106	68511	6	6	4	4	0.28	Fanconi anemia group G protein OS=Homo sapiens GN=FANCG PE=1 SV=1
558	1	UniProt_human	F8W9S7	105	157365	4	4	3	3	0.08	GTPase-activating protein and VPS9 domain-containing protein 1 OS=Homo sapiens GN=GAPVD1 PE=1 SV=1
559	1	UniProt_human	Q8N0X7	104	72788	4	4	2	2	0.12	Spartin OS=Homo sapiens GN=SPG20 PE=1 SV=1
560	1	UniProt_human	Q8N556	104	80675	2	2	1	1	0.05	Actin filament-associated protein 1 OS=Homo sapiens GN=AFAP1 PE=1 SV=2
561	1	UniProt_human	Q8IXB1	103	91021	4	4	3	3	0.15	DnaJ homolog subfamily C member 10 OS=Homo sapiens GN=DNAJC10 PE=1 SV=2
562	1	UniProt_human	P48651	103	55491	2	2	1	1	0.08	Phosphatidylserine synthase 1 OS=Homo sapiens GN=PTDSS1 PE=1 SV=1
563	1	UniProt_human	P50548	103	58666	4	4	4	4	0.33	ETS domain-containing transcription factor ERF OS=Homo sapiens GN=ERF PE=1 SV=2
564	1	UniProt_human	O43187	102	69389	4	4	4	4	0.28	Interleukin-1 receptor-associated kinase-like 2 OS=Homo sapiens GN=IRAK2 PE=1 SV=2
565	1	UniProt_human	Q8NFG4	102	64432	2	2	2	2	0.14	Folliculin OS=Homo sapiens GN=FLCN PE=1 SV=1
566	1	UniProt_human	Q9UKA2	102	70051	2	2	2	2	0.13	F-box/LRR-repeat protein 4 OS=Homo sapiens GN=FBXL4 PE=1 SV=2
567	1	UniProt_human	E7EX48	102	80563	4	4	4	4	0.23	Serine/threonine-protein kinase Nek4 (Fragment) OS=Homo sapiens GN=NEK4 PE=1 SV=1
399	2	UniProt_human	O94808	101	76882	3	3	3	3	0.18	Glutamine--fructose-6-phosphate aminotransferase [isomerizing] 2 OS=Homo sapiens GN=GFPT2 PE=1 SV=3
568	1	UniProt_human	Q6P9H4	101	61865	4	4	3	3	0.23	Connector enhancer of kinase suppressor of ras 3 OS=Homo sapiens GN=CNKSR3 PE=1 SV=1
569	1	UniProt_human	Q9P0U3	101	73435	3	3	2	2	0.12	Sentrin-specific protease 1 OS=Homo sapiens GN=SENP1 PE=1 SV=2
570	1	UniProt_human	A0A0C4DFS8	101	41839	3	3	3	3	0.35	Nicotinamide phosphoribosyltransferase OS=Homo sapiens GN=NAMPT PE=1 SV=1
571	1	UniProt_human	Q9H6T3	100	75672	3	3	3	3	0.18	RNA polymerase II-associated protein 3 OS=Homo sapiens GN=RPAP3 PE=1 SV=2
572	1	UniProt_human	Q9H992	100	78003	5	5	5	5	0.31	E3 ubiquitin-protein ligase MARCH7 OS=Homo sapiens GN=MARCH7 PE=1 SV=1
573	1	UniProt_human	Q9BZI7	100	57727	7	7	6	6	0.55	Regulator of nonsense transcripts 3B OS=Homo sapiens GN=UPF3B PE=1 SV=1
574	1	UniProt_human	Q05655	100	77455	2	2	1	1	0.06	Protein kinase C delta type OS=Homo sapiens GN=PRKCD PE=1 SV=2
575	1	UniProt_human	P14923	100	81693	4	4	3	3	0.17	Junction plakoglobin OS=Homo sapiens GN=JUP PE=1 SV=3
576	1	UniProt_human	Q13492	100	70710	2	2	2	2	0.13	Phosphatidylinositol-binding clathrin assembly protein OS=Homo sapiens GN=PICALM PE=1 SV=2
577	1	UniProt_human	Q9NVH0	99	70308	4	4	4	4	0.27	Exonuclease 3'-5' domain-containing protein 2 OS=Homo sapiens GN=EXD2 PE=1 SV=2
578	1	UniProt_human	H3BRY6	99	51551	3	3	3	3	0.28	von Willebrand factor A domain-containing protein 9 OS=Homo sapiens GN=VWA9 PE=1 SV=1
579	1	UniProt_human	A0A0X1KG71	99	69995	3	3	2	2	0.13	Negative elongation factor B OS=Homo sapiens GN=NELFB PE=1 SV=1
580	1	UniProt_human	E9PCN2	99	73025	3	3	3	3	0.19	Guanylate cyclase soluble subunit beta-1 OS=Homo sapiens GN=GUCY1B3 PE=1 SV=1
581	1	UniProt_human	Q7RTS9	98	75887	3	3	3	3	0.18	Dymeclin OS=Homo sapiens GN=DYM PE=1 SV=1
582	1	UniProt_human	H3BR06	98	31484	1	1	1	1	0.14	Telomeric repeat-binding factor 2 (Fragment) OS=Homo sapiens GN=TERF2 PE=1 SV=1
583	1	UniProt_human	H7C3E9	98	44130	2	2	2	2	0.21	Probable ATP-dependent RNA helicase DDX56 (Fragment) OS=Homo sapiens GN=DDX56 PE=1 SV=1
584	1	UniProt_human	Q7Z6J9	98	58783	4	4	2	2	0.15	tRNA-splicing endonuclease subunit Sen54 OS=Homo sapiens GN=TSEN54 PE=1 SV=3
585	1	UniProt_human	Q9H089	98	75178	2	2	2	2	0.12	Large subunit GTPase 1 homolog OS=Homo sapiens GN=LSG1 PE=1 SV=2
586	1	UniProt_human	Q08211	97	140869	3	3	2	2	0.06	ATP-dependent RNA helicase A OS=Homo sapiens GN=DHX9 PE=1 SV=4
587	1	UniProt_human	Q9HBE1-2	97	57958	3	3	2	2	0.16	Isoform 2 of POZ-, AT hook-, and zinc finger-containing protein 1 OS=Homo sapiens GN=PATZ1
588	1	UniProt_human	O00186	97	67721	6	6	3	3	0.21	Syntaxin-binding protein 3 OS=Homo sapiens GN=STXBP3 PE=1 SV=2
589	1	UniProt_human	Q14680	97	74594	4	4	3	3	0.19	Maternal embryonic leucine zipper kinase OS=Homo sapiens GN=MELK PE=1 SV=3
590	1	UniProt_human	H0Y919	96	15665	1	1	1	1	0.3	Serine/threonine-protein kinase RIO2 (Fragment) OS=Homo sapiens GN=RIOK2 PE=1 SV=1
591	1	UniProt_human	A0A087WY68	96	106560	5	5	3	3	0.13	Proprotein convertase subtilisin/kexin type 6 OS=Homo sapiens GN=PCSK6 PE=1 SV=1
592	1	UniProt_human	F2Z2C7	96	17860	3	3	2	2	0.59	Protein transport protein Sec61 subunit alpha isoform 2 OS=Homo sapiens GN=SEC61A2 PE=1 SV=1
593	1	UniProt_human	O60884	96	45717	2	2	1	1	0.1	DnaJ homolog subfamily A member 2 OS=Homo sapiens GN=DNAJA2 PE=1 SV=1
594	1	UniProt_human	Q08357	95	70347	1	1	1	1	0.06	Sodium-dependent phosphate transporter 2 OS=Homo sapiens GN=SLC20A2 PE=1 SV=1
595	1	UniProt_human	Q86SF2	95	75341	4	4	4	4	0.25	N-acetylgalactosaminyltransferase 7 OS=Homo sapiens GN=GALNT7 PE=1 SV=1
596	1	UniProt_human	Q9Y289	95	68596	6	6	4	4	0.28	Sodium-dependent multivitamin transporter OS=Homo sapiens GN=SLC5A6 PE=2 SV=2
597	1	UniProt_human	A0A0B4J1Z1	95	15753	4	4	3	3	1.2	Serine/arginine-rich-splicing factor 7 OS=Homo sapiens GN=SRSF7 PE=1 SV=1
598	1	UniProt_human	J3KQ69	94	91872	1	1	1	1	0.05	DNA replication licensing factor MCM3 OS=Homo sapiens GN=MCM3 PE=1 SV=2
599	1	UniProt_human	O94763-4	94	53414	2	2	1	1	0.08	Isoform 4 of Unconventional prefoldin RPB5 interactor 1 OS=Homo sapiens GN=URI1
600	1	UniProt_human	F8W1I9	94	80413	2	2	2	2	0.11	Acyl-CoA dehydrogenase family member 10 OS=Homo sapiens GN=ACAD10 PE=1 SV=1
601	1	UniProt_human	M0QXI6	94	11418	1	1	1	1	0.43	RuvB-like helicase (Fragment) OS=Homo sapiens GN=RUVBL2 PE=1 SV=1
602	1	UniProt_human	Q5D862	94	247928	3	3	2	2	0.03	Filaggrin-2 OS=Homo sapiens GN=FLG2 PE=1 SV=1
603	1	UniProt_human	H0UI80	93	67304	3	3	3	3	0.21	Negative elongation factor C/D OS=Homo sapiens GN=TH1L PE=1 SV=1
604	1	UniProt_human	Q5JQZ9	93	29380	4	4	3	3	0.54	Cyclin-dependent kinase 19 (Fragment) OS=Homo sapiens GN=CDK19 PE=1 SV=1
65	5	UniProt_human	B1AKD8	92	149087	6	6	3	3	0.09	Rootletin (Fragment) OS=Homo sapiens GN=CROCC PE=1 SV=2
605	1	UniProt_human	H0Y2V6	92	171980	2	2	2	2	0.05	Centrosomal protein of 170 kDa (Fragment) OS=Homo sapiens GN=CEP170 PE=1 SV=1
606	1	UniProt_human	Q53HC5	92	68096	3	3	3	3	0.21	Kelch-like protein 26 OS=Homo sapiens GN=KLHL26 PE=1 SV=2
607	1	UniProt_human	K7ESN3	92	51782	2	2	2	2	0.18	GH3 domain-containing protein OS=Homo sapiens GN=GHDC PE=1 SV=1
608	1	UniProt_human	P14868-2	92	45742	3	3	3	3	0.32	Isoform 2 of Aspartate--tRNA ligase, cytoplasmic OS=Homo sapiens GN=DARS
609	1	UniProt_human	H7C4H7	92	26702	2	2	1	1	0.17	5-aminolevulinate synthase, nonspecific, mitochondrial (Fragment) OS=Homo sapiens GN=ALAS1 PE=1 SV=1
610	1	UniProt_human	F8VX04	91	56158	3	3	2	2	0.16	Sodium-coupled neutral amino acid transporter 1 OS=Homo sapiens GN=SLC38A1 PE=1 SV=1
611	1	UniProt_human	P27797	91	48112	2	2	1	1	0.09	Calreticulin OS=Homo sapiens GN=CALR PE=1 SV=1
612	1	UniProt_human	J3KMX2	90	52205	3	3	3	3	0.28	SWI/SNF-related matrix-associated actin-dependent regulator of chromatin subfamily D member 2 OS=Homo sapiens GN=SMARCD2 PE=1 SV=1
613	1	UniProt_human	A0A0G2JNH5	90	57251	3	3	3	3	0.25	Cell cycle checkpoint protein RAD17 OS=Homo sapiens GN=RAD17 PE=1 SV=1
614	1	UniProt_human	Q7L099	90	52931	3	3	3	3	0.27	Protein RUFY3 OS=Homo sapiens GN=RUFY3 PE=1 SV=1
615	1	UniProt_human	A0A0C4DFX9	90	58462	1	1	1	1	0.08	Negative elongation factor A OS=Homo sapiens GN=NELFA PE=1 SV=1
616	1	UniProt_human	Q9H9S5	90	54533	4	4	3	3	0.26	Fukutin-related protein OS=Homo sapiens GN=FKRP PE=1 SV=1
617	1	UniProt_human	Q9UQ90	90	88179	4	4	4	4	0.21	Paraplegin OS=Homo sapiens GN=SPG7 PE=1 SV=2
618	1	UniProt_human	Q01518	89	51869	3	3	3	3	0.28	Adenylyl cyclase-associated protein 1 OS=Homo sapiens GN=CAP1 PE=1 SV=5
619	1	UniProt_human	Q8IZD4	89	67681	3	3	3	3	0.21	mRNA-decapping enzyme 1B OS=Homo sapiens GN=DCP1B PE=1 SV=2
620	1	UniProt_human	Q13243	89	31245	2	2	2	2	0.31	Serine/arginine-rich splicing factor 5 OS=Homo sapiens GN=SRSF5 PE=1 SV=1
621	1	UniProt_human	Q96T51	89	79767	4	4	4	4	0.24	RUN and FYVE domain-containing protein 1 OS=Homo sapiens GN=RUFY1 PE=1 SV=2
622	1	UniProt_human	Q7L576	88	145089	3	3	3	3	0.09	Cytoplasmic FMR1-interacting protein 1 OS=Homo sapiens GN=CYFIP1 PE=1 SV=1
623	1	UniProt_human	H7C3M2	88	29621	3	3	3	3	0.53	60S ribosomal protein L3 (Fragment) OS=Homo sapiens GN=RPL3 PE=1 SV=1
624	1	UniProt_human	A0A140TA73	88	19410	3	3	2	2	0.54	Beta-2-syntrophin (Fragment) OS=Homo sapiens GN=SNTB2 PE=1 SV=1
625	1	UniProt_human	Q5VUJ6	88	84536	1	1	1	1	0.05	Leucine-rich repeat and calponin homology domain-containing protein 2 OS=Homo sapiens GN=LRCH2 PE=2 SV=2
236	2	UniProt_human	P48454	87	58092	5	5	3	3	0.24	Serine/threonine-protein phosphatase 2B catalytic subunit gamma isoform OS=Homo sapiens GN=PPP3CC PE=1 SV=3
626	1	UniProt_human	Q14315	87	290841	5	5	5	5	0.08	Filamin-C OS=Homo sapiens GN=FLNC PE=1 SV=3
627	1	UniProt_human	O95219	87	51876	4	4	4	4	0.39	Sorting nexin-4 OS=Homo sapiens GN=SNX4 PE=1 SV=1
628	1	UniProt_human	Q9BTT6	87	59205	4	4	4	4	0.33	Leucine-rich repeat-containing protein 1 OS=Homo sapiens GN=LRRC1 PE=1 SV=1
629	1	UniProt_human	H0YC04	87	21101	1	1	1	1	0.22	V-type proton ATPase subunit B, brain isoform (Fragment) OS=Homo sapiens GN=ATP6V1B2 PE=1 SV=1
630	1	UniProt_human	A0A075B6P5	87	12948	1	1	1	1	0.37	Protein IGKV2-28 (Fragment) OS=Homo sapiens GN=IGKV2D-28 PE=1 SV=1
631	1	UniProt_human	Q92990	87	68165	5	5	4	4	0.28	Glomulin OS=Homo sapiens GN=GLMN PE=1 SV=2
633	1	UniProt_human	E5RJU9	86	57487	5	5	4	4	0.34	Protein LYRIC OS=Homo sapiens GN=MTDH PE=1 SV=1
634	1	UniProt_human	B4E3S0	86	41577	1	1	1	1	0.11	Coronin OS=Homo sapiens GN=CORO1C PE=1 SV=1
635	1	UniProt_human	E9PMG4	86	55363	2	2	1	1	0.08	Telomerase Cajal body protein 1 OS=Homo sapiens GN=WRAP53 PE=1 SV=1
636	1	UniProt_human	O94955	86	69368	2	2	2	2	0.13	Rho-related BTB domain-containing protein 3 OS=Homo sapiens GN=RHOBTB3 PE=1 SV=2
637	1	UniProt_human	A0A0A0MS31	86	32467	4	4	2	2	0.3	Caspase-8 OS=Homo sapiens GN=CASP8 PE=1 SV=1
638	1	UniProt_human	B5MC51	86	71147	4	4	4	4	0.27	LIM domain kinase 2 OS=Homo sapiens GN=LIMK2 PE=1 SV=1
639	1	UniProt_human	Q8N1B4	86	82170	2	2	2	2	0.11	Vacuolar protein sorting-associated protein 52 homolog OS=Homo sapiens GN=VPS52 PE=1 SV=1
640	1	UniProt_human	P57772	86	65263	2	2	2	2	0.14	Selenocysteine-specific elongation factor OS=Homo sapiens GN=EEFSEC PE=1 SV=4
641	1	UniProt_human	M0QZF4	86	31922	2	2	2	2	0.3	SH3KBP1-binding protein 1 (Fragment) OS=Homo sapiens GN=SHKBP1 PE=1 SV=1
642	1	UniProt_human	B7Z3B9	85	64433	1	1	1	1	0.07	GRB2-associated-binding protein 1 OS=Homo sapiens GN=GAB1 PE=1 SV=1
643	1	UniProt_human	Q16352	85	55357	2	2	2	2	0.17	Alpha-internexin OS=Homo sapiens GN=INA PE=1 SV=2
632	1	UniProt_human	Q6P1M9	84	62307	3	3	3	3	0.23	Armadillo repeat-containing X-linked protein 5 OS=Homo sapiens GN=ARMCX5 PE=1 SV=1
644	1	UniProt_human	Q8NE62	84	65317	2	2	2	2	0.14	Choline dehydrogenase, mitochondrial OS=Homo sapiens GN=CHDH PE=1 SV=2
645	1	UniProt_human	Q9H6R0	84	78824	3	3	3	3	0.18	Putative ATP-dependent RNA helicase DHX33 OS=Homo sapiens GN=DHX33 PE=1 SV=2
646	1	UniProt_human	Q9BV94	84	64712	2	2	1	1	0.07	ER degradation-enhancing alpha-mannosidase-like protein 2 OS=Homo sapiens GN=EDEM2 PE=1 SV=2
647	1	UniProt_human	S4R3V8	84	66134	2	2	2	2	0.14	Lipolysis-stimulated lipoprotein receptor OS=Homo sapiens GN=LSR PE=1 SV=2
648	1	UniProt_human	Q96AY3	83	64204	3	3	3	3	0.22	Peptidyl-prolyl cis-trans isomerase FKBP10 OS=Homo sapiens GN=FKBP10 PE=1 SV=1
406	2	UniProt_human	A0A087WXI3	82	47867	2	2	2	2	0.19	Synaptic functional regulator FMR1 OS=Homo sapiens GN=FMR1 PE=1 SV=1
649	1	UniProt_human	Q8IX90	82	46330	2	2	2	2	0.2	Spindle and kinetochore-associated protein 3 OS=Homo sapiens GN=SKA3 PE=1 SV=2
650	1	UniProt_human	Q9NYB0	82	44233	3	3	2	2	0.21	Telomeric repeat-binding factor 2-interacting protein 1 OS=Homo sapiens GN=TERF2IP PE=1 SV=1
651	1	UniProt_human	Q5SNT2	82	72190	5	5	4	4	0.26	Transmembrane protein 201 OS=Homo sapiens GN=TMEM201 PE=1 SV=1
652	1	UniProt_human	Q9H6T0	82	78351	3	3	3	3	0.18	Epithelial splicing regulatory protein 2 OS=Homo sapiens GN=ESRP2 PE=1 SV=1
653	1	UniProt_human	C9JUT4	82	45317	3	3	2	2	0.21	LIM domain containing preferred translocation partner in lipoma, isoform CRA_e OS=Homo sapiens GN=LPP PE=1 SV=1
654	1	UniProt_human	P15924-2	82	259957	5	5	5	5	0.09	Isoform DPII of Desmoplakin OS=Homo sapiens GN=DSP
655	1	UniProt_human	A0A087WXG2	82	45094	4	4	3	3	0.32	Uncharacterized aarF domain-containing protein kinase 2 OS=Homo sapiens GN=ADCK2 PE=1 SV=1
656	1	UniProt_human	Q9NXB0	81	64487	5	5	5	5	0.39	Meckel syndrome type 1 protein OS=Homo sapiens GN=MKS1 PE=1 SV=2
657	1	UniProt_human	J3QRF7	81	27247	1	1	1	1	0.17	Proton-coupled folate transporter (Fragment) OS=Homo sapiens GN=SLC46A1 PE=1 SV=1
658	1	UniProt_human	B7Z2Y2	81	76032	2	2	2	2	0.12	Conserved oligomeric Golgi complex subunit 2 OS=Homo sapiens GN=COG2 PE=1 SV=1
659	1	UniProt_human	Q9NP61	81	56893	2	2	2	2	0.16	ADP-ribosylation factor GTPase-activating protein 3 OS=Homo sapiens GN=ARFGAP3 PE=1 SV=1
660	1	UniProt_human	O95373	80	119440	2	2	2	2	0.07	Importin-7 OS=Homo sapiens GN=IPO7 PE=1 SV=1
661	1	UniProt_human	P04406	80	36030	3	3	2	2	0.26	Glyceraldehyde-3-phosphate dehydrogenase OS=Homo sapiens GN=GAPDH PE=1 SV=3
662	1	UniProt_human	Q9UHI6	80	92182	3	3	3	3	0.15	Probable ATP-dependent RNA helicase DDX20 OS=Homo sapiens GN=DDX20 PE=1 SV=2
663	1	UniProt_human	E9PD35	80	146362	2	2	2	2	0.06	Vascular endothelial growth factor receptor 3 OS=Homo sapiens GN=FLT4 PE=1 SV=1
271	3	UniProt_human	A0A087WYD6	79	77548	4	4	4	4	0.24	Antigen peptide transporter 2 OS=Homo sapiens GN=TAP2 PE=1 SV=1
664	1	UniProt_human	Q8N4P2	79	76050	2	2	1	1	0.06	Tetratricopeptide repeat protein 30B OS=Homo sapiens GN=TTC30B PE=1 SV=2
665	1	UniProt_human	A0A087WWJ1	79	121040	3	3	3	3	0.11	DNA mismatch repair protein Msh6 OS=Homo sapiens GN=MSH6 PE=1 SV=1
666	1	UniProt_human	Q9UBD5	79	82201	1	1	1	1	0.05	Origin recognition complex subunit 3 OS=Homo sapiens GN=ORC3 PE=1 SV=1
667	1	UniProt_human	Q02809	79	83497	5	5	3	3	0.16	Procollagen-lysine,2-oxoglutarate 5-dioxygenase 1 OS=Homo sapiens GN=PLOD1 PE=1 SV=2
668	1	UniProt_human	O43663	79	71562	5	5	4	4	0.27	Protein regulator of cytokinesis 1 OS=Homo sapiens GN=PRC1 PE=1 SV=2
669	1	UniProt_human	A0A087WYE2	79	58948	2	2	2	2	0.15	Probable inactive glycosyltransferase 25 family member 3 OS=Homo sapiens GN=CERCAM PE=1 SV=1
670	1	UniProt_human	J3QRS9	78	52507	2	2	2	2	0.17	BUB3-interacting and GLEBS motif-containing protein ZNF207 OS=Homo sapiens GN=ZNF207 PE=1 SV=1
671	1	UniProt_human	E7EWR4	78	62902	1	1	1	1	0.07	Cleavage stimulation factor subunit 2 OS=Homo sapiens GN=CSTF2 PE=1 SV=1
672	1	UniProt_human	K4DI93	78	102691	2	2	2	2	0.09	Cullin 4B, isoform CRA_e OS=Homo sapiens GN=CUL4B PE=1 SV=1
673	1	UniProt_human	Q15428	78	49224	6	6	3	3	0.29	Splicing factor 3A subunit 2 OS=Homo sapiens GN=SF3A2 PE=1 SV=2
674	1	UniProt_human	C9JA08	78	60087	1	1	1	1	0.07	60S ribosomal export protein NMD3 OS=Homo sapiens GN=NMD3 PE=1 SV=1
675	1	UniProt_human	H7BZK4	78	23627	1	1	1	1	0.19	Sodium-dependent phosphate transporter 1 (Fragment) OS=Homo sapiens GN=SLC20A1 PE=1 SV=1
676	1	UniProt_human	Q9Y3I1	78	58466	1	1	1	1	0.08	F-box only protein 7 OS=Homo sapiens GN=FBXO7 PE=1 SV=1
677	1	UniProt_human	Q8TCJ2	78	93614	2	2	2	2	0.09	Dolichyl-diphosphooligosaccharide--protein glycosyltransferase subunit STT3B OS=Homo sapiens GN=STT3B PE=1 SV=1
678	1	UniProt_human	B5ME19	78	105407	3	3	3	3	0.13	Eukaryotic translation initiation factor 3 subunit C-like protein OS=Homo sapiens GN=EIF3CL PE=3 SV=1
679	1	UniProt_human	H7C331	77	18975	1	1	1	1	0.25	Serologically defined colon cancer antigen 3 (Fragment) OS=Homo sapiens GN=SDCCAG3 PE=1 SV=1
680	1	UniProt_human	P07384	77	81838	3	3	3	3	0.17	Calpain-1 catalytic subunit OS=Homo sapiens GN=CAPN1 PE=1 SV=1
681	1	UniProt_human	A0A0C4DFN5	77	67972	1	1	1	1	0.06	Chromosome 10 open reading frame 61 OS=Homo sapiens GN=TCTN3 PE=1 SV=1
682	1	UniProt_human	M0R344	77	70038	2	2	2	2	0.13	Sphingosine kinase 2 OS=Homo sapiens GN=SPHK2 PE=1 SV=1
683	1	UniProt_human	Q3SY69	77	101681	2	2	2	2	0.09	Mitochondrial 10-formyltetrahydrofolate dehydrogenase OS=Homo sapiens GN=ALDH1L2 PE=1 SV=2
684	1	UniProt_human	O95218	77	37382	2	2	2	2	0.25	Zinc finger Ran-binding domain-containing protein 2 OS=Homo sapiens GN=ZRANB2 PE=1 SV=2
685	1	UniProt_human	A0A0A0MTS2	77	64784	2	2	2	2	0.14	Glucose-6-phosphate isomerase (Fragment) OS=Homo sapiens GN=GPI PE=1 SV=1
686	1	UniProt_human	A6NLH6	77	15760	2	2	1	1	0.3	Protein cornichon homolog 4 OS=Homo sapiens GN=CNIH4 PE=1 SV=1
687	1	UniProt_human	Q6ZRV2	76	127044	2	2	2	2	0.07	Protein FAM83H OS=Homo sapiens GN=FAM83H PE=1 SV=3
620	2	UniProt_human	Q13247	75	39563	2	2	2	2	0.24	Serine/arginine-rich splicing factor 6 OS=Homo sapiens GN=SRSF6 PE=1 SV=2
688	1	UniProt_human	H0YKS4	75	19518	3	3	3	3	0.9	Annexin (Fragment) OS=Homo sapiens GN=ANXA2 PE=1 SV=1
689	1	UniProt_human	O14828	75	38262	1	1	1	1	0.12	Secretory carrier-associated membrane protein 3 OS=Homo sapiens GN=SCAMP3 PE=1 SV=3
691	1	UniProt_human	A0A0A0MRY0	75	55770	3	3	3	3	0.26	TBC1 domain family member 22A OS=Homo sapiens GN=TBC1D22A PE=1 SV=1
692	1	UniProt_human	P17655	75	79945	2	2	2	2	0.11	Calpain-2 catalytic subunit OS=Homo sapiens GN=CAPN2 PE=1 SV=6
597	2	UniProt_human	A0A087X2D0	74	10314	3	3	2	2	1.21	Serine/arginine-rich-splicing factor 3 OS=Homo sapiens GN=SRSF3 PE=1 SV=1
690	1	UniProt_human	F8W7U8	74	80472	2	2	2	2	0.11	Double-strand break repair protein MRE11A OS=Homo sapiens GN=MRE11A PE=1 SV=1
693	1	UniProt_human	Q12948	74	56753	4	4	2	2	0.16	Forkhead box protein C1 OS=Homo sapiens GN=FOXC1 PE=1 SV=3
694	1	UniProt_human	Q8WU76	74	75079	1	1	1	1	0.06	Sec1 family domain-containing protein 2 OS=Homo sapiens GN=SCFD2 PE=1 SV=2
695	1	UniProt_human	Q6UX04	74	53814	2	2	2	2	0.17	Peptidyl-prolyl cis-trans isomerase CWC27 homolog OS=Homo sapiens GN=CWC27 PE=1 SV=1
696	1	UniProt_human	A0A0C4DGS9	74	31273	4	4	1	1	0.14	Choline/ethanolaminephosphotransferase 1 OS=Homo sapiens GN=CEPT1 PE=1 SV=1
476	2	UniProt_human	Q9NUQ3	73	60548	3	3	3	3	0.23	Gamma-taxilin OS=Homo sapiens GN=TXLNG PE=1 SV=2
697	1	UniProt_human	C9JYX1	73	20663	1	1	1	1	0.22	Transmembrane protein 209 (Fragment) OS=Homo sapiens GN=TMEM209 PE=1 SV=8
698	1	UniProt_human	Q5SRN1	73	60792	3	3	3	3	0.23	Pre-mRNA-processing factor 17 OS=Homo sapiens GN=CDC40 PE=1 SV=1
699	1	UniProt_human	Q6P2E9	73	151567	1	1	1	1	0.03	Enhancer of mRNA-decapping protein 4 OS=Homo sapiens GN=EDC4 PE=1 SV=1
700	1	UniProt_human	O14777	73	73867	2	2	2	2	0.12	Kinetochore protein NDC80 homolog OS=Homo sapiens GN=NDC80 PE=1 SV=1
701	1	UniProt_human	Q96M89	73	76171	4	4	3	3	0.18	Coiled-coil domain-containing protein 138 OS=Homo sapiens GN=CCDC138 PE=1 SV=1
702	1	UniProt_human	P23921	73	90013	1	1	1	1	0.05	Ribonucleoside-diphosphate reductase large subunit OS=Homo sapiens GN=RRM1 PE=1 SV=1
703	1	UniProt_human	K7ELL7	73	60154	2	2	2	2	0.15	Glucosidase 2 subunit beta OS=Homo sapiens GN=PRKCSH PE=1 SV=1
704	1	UniProt_human	Q14181	73	65906	4	4	2	2	0.14	DNA polymerase alpha subunit B OS=Homo sapiens GN=POLA2 PE=1 SV=2
705	1	UniProt_human	J3QSX3	73	35975	1	1	1	1	0.12	Kelch-like protein 12 (Fragment) OS=Homo sapiens GN=KLHL12 PE=1 SV=1
706	1	UniProt_human	A0A075B6Z2	72	2220	9	9	1	1	4.07	Protein TRAJ56 (Fragment) OS=Homo sapiens GN=TRAJ56 PE=4 SV=1
707	1	UniProt_human	O43823	72	76061	1	1	1	1	0.06	A-kinase anchor protein 8 OS=Homo sapiens GN=AKAP8 PE=1 SV=1
708	1	UniProt_human	Q92616	72	292572	4	4	4	4	0.06	eIF-2-alpha kinase activator GCN1 OS=Homo sapiens GN=GCN1 PE=1 SV=6
709	1	UniProt_human	P01008	72	52569	1	1	1	1	0.08	Antithrombin-III OS=Homo sapiens GN=SERPINC1 PE=1 SV=1
710	1	UniProt_human	Q9UNK9	72	75227	1	1	1	1	0.06	Protein angel homolog 1 OS=Homo sapiens GN=ANGEL1 PE=1 SV=1
711	1	UniProt_human	Q07021	71	31343	1	1	1	1	0.14	Complement component 1 Q subcomponent-binding protein, mitochondrial OS=Homo sapiens GN=C1QBP PE=1 SV=1
712	1	UniProt_human	O14975	71	70267	4	4	4	4	0.27	Very long-chain acyl-CoA synthetase OS=Homo sapiens GN=SLC27A2 PE=1 SV=2
713	1	UniProt_human	M0QYQ9	71	5530	2	2	1	1	1.04	Splicing factor U2AF 65 kDa subunit (Fragment) OS=Homo sapiens GN=U2AF2 PE=4 SV=1
714	1	UniProt_human	Q7Z434	71	56493	1	1	1	1	0.08	Mitochondrial antiviral-signaling protein OS=Homo sapiens GN=MAVS PE=1 SV=2
715	1	UniProt_human	O15091	71	67272	3	3	2	2	0.13	Mitochondrial ribonuclease P protein 3 OS=Homo sapiens GN=KIAA0391 PE=1 SV=2
716	1	UniProt_human	Q8TB52	71	82251	1	1	1	1	0.05	F-box only protein 30 OS=Homo sapiens GN=FBXO30 PE=1 SV=3
717	1	UniProt_human	Q86UA1	71	78381	1	1	1	1	0.06	Pre-mRNA-processing factor 39 OS=Homo sapiens GN=PRPF39 PE=1 SV=3
718	1	UniProt_human	H7C0B8	71	7730	1	1	1	1	0.68	Procollagen-lysine,2-oxoglutarate 5-dioxygenase 3 (Fragment) OS=Homo sapiens GN=PLOD3 PE=1 SV=1
719	1	UniProt_human	H3BME1	70	61641	1	1	1	1	0.07	F-box/LRR-repeat protein 19 OS=Homo sapiens GN=FBXL19 PE=1 SV=1
720	1	UniProt_human	G3V1C3	70	57525	1	1	1	1	0.08	Apoptosis inhibitor 5 OS=Homo sapiens GN=API5 PE=1 SV=1
721	1	UniProt_human	H0YJ11	70	24359	1	1	1	1	0.19	Alpha-actinin-1 (Fragment) OS=Homo sapiens GN=ACTN1 PE=1 SV=1
722	1	UniProt_human	Q93034	70	90897	4	4	4	4	0.21	Cullin-5 OS=Homo sapiens GN=CUL5 PE=1 SV=4
723	1	UniProt_human	Q96GW9	69	66549	1	1	1	1	0.07	Methionine--tRNA ligase, mitochondrial OS=Homo sapiens GN=MARS2 PE=1 SV=2
724	1	UniProt_human	Q5W0B1	69	81066	4	4	4	4	0.23	RING finger protein 219 OS=Homo sapiens GN=RNF219 PE=1 SV=1
725	1	UniProt_human	Q15464	69	55008	5	5	3	3	0.26	SH2 domain-containing adapter protein B OS=Homo sapiens GN=SHB PE=1 SV=2
726	1	UniProt_human	Q69YN2	69	60581	1	1	1	1	0.07	CWF19-like protein 1 OS=Homo sapiens GN=CWF19L1 PE=1 SV=2
727	1	UniProt_human	A0A0A0MRZ4	69	70031	2	2	2	2	0.13	TNFAIP3-interacting protein 1 OS=Homo sapiens GN=TNIP1 PE=1 SV=1
728	1	UniProt_human	E9PIG2	68	17351	1	1	1	1	0.27	Serpin H1 (Fragment) OS=Homo sapiens GN=SERPINH1 PE=1 SV=2
729	1	UniProt_human	P48449	68	83255	1	1	1	1	0.05	Lanosterol synthase OS=Homo sapiens GN=LSS PE=1 SV=1
731	1	UniProt_human	Q12996	68	82869	1	1	1	1	0.05	Cleavage stimulation factor subunit 3 OS=Homo sapiens GN=CSTF3 PE=1 SV=1
732	1	UniProt_human	Q15393	68	135492	1	1	1	1	0.03	Splicing factor 3B subunit 3 OS=Homo sapiens GN=SF3B3 PE=1 SV=4
733	1	UniProt_human	G3XAH9	68	58274	1	1	1	1	0.08	Suppression of tumorigenicity 7, isoform CRA_b OS=Homo sapiens GN=ST7 PE=1 SV=1
734	1	UniProt_human	E9PLV6	68	26060	1	1	1	1	0.17	Glycosylphosphatidylinositol anchor attachment 1 protein OS=Homo sapiens GN=GPAA1 PE=1 SV=1
735	1	UniProt_human	E9PFR3	67	69073	5	5	5	5	0.36	Serine/threonine-protein phosphatase 2A 56 kDa regulatory subunit delta isoform OS=Homo sapiens GN=PPP2R5D PE=1 SV=1
736	1	UniProt_human	O96018	67	61416	1	1	1	1	0.07	Amyloid beta A4 precursor protein-binding family A member 3 OS=Homo sapiens GN=APBA3 PE=1 SV=1
737	1	UniProt_human	P38432	67	62570	2	2	2	2	0.14	Coilin OS=Homo sapiens GN=COIL PE=1 SV=1
738	1	UniProt_human	D6RB59	67	53208	1	1	1	1	0.08	Exocyst complex component 3 OS=Homo sapiens GN=EXOC3 PE=1 SV=1
739	1	UniProt_human	Q5JRG1	67	49065	1	1	1	1	0.09	Nucleoporin p58/p45 (Fragment) OS=Homo sapiens GN=NUP58 PE=1 SV=1
740	1	UniProt_human	A0A087WU65	67	50704	3	3	3	3	0.28	Vacuolar protein sorting-associated protein 45 OS=Homo sapiens GN=VPS45 PE=1 SV=1
741	1	UniProt_human	P13010	67	82652	1	1	1	1	0.05	X-ray repair cross-complementing protein 5 OS=Homo sapiens GN=XRCC5 PE=1 SV=3
742	1	UniProt_human	A9UF01	67	51124	1	1	1	1	0.09	BCR/ABL fusion protein isoform X8 OS=Homo sapiens GN=BCR/ABL fusion PE=1 SV=1
743	1	UniProt_human	P46060	67	63502	3	3	3	3	0.22	Ran GTPase-activating protein 1 OS=Homo sapiens GN=RANGAP1 PE=1 SV=1
2	13	UniProt_human	O00459	66	81495	3	3	3	3	0.17	Phosphatidylinositol 3-kinase regulatory subunit beta OS=Homo sapiens GN=PIK3R2 PE=1 SV=2
730	1	UniProt_human	P35030	66	32508	3	3	3	3	0.47	Trypsin-3 OS=Homo sapiens GN=PRSS3 PE=1 SV=2
744	1	UniProt_human	F5H5I6	66	47941	1	1	1	1	0.09	G-rich sequence factor 1 OS=Homo sapiens GN=GRSF1 PE=1 SV=2
745	1	UniProt_human	Q8N428	66	63034	2	2	1	1	0.07	Polypeptide N-acetylgalactosaminyltransferase 16 OS=Homo sapiens GN=GALNT16 PE=1 SV=2
746	1	UniProt_human	A0A0A0MRA5	66	85887	1	1	1	1	0.05	Heterogeneous nuclear ribonucleoprotein U-like protein 1 OS=Homo sapiens GN=HNRNPUL1 PE=1 SV=1
747	1	UniProt_human	O14964	66	86138	1	1	1	1	0.05	Hepatocyte growth factor-regulated tyrosine kinase substrate OS=Homo sapiens GN=HGS PE=1 SV=1
748	1	UniProt_human	Q13564	66	60209	3	3	2	2	0.15	NEDD8-activating enzyme E1 regulatory subunit OS=Homo sapiens GN=NAE1 PE=1 SV=1
749	1	UniProt_human	Q6PI26	66	65084	1	1	1	1	0.07	Protein SHQ1 homolog OS=Homo sapiens GN=SHQ1 PE=1 SV=2
750	1	UniProt_human	B4DKY1	65	84225	2	2	2	2	0.11	Cysteine--tRNA ligase, cytoplasmic OS=Homo sapiens GN=CARS PE=1 SV=1
751	1	UniProt_human	O43776	65	62903	4	4	3	3	0.22	Asparagine--tRNA ligase, cytoplasmic OS=Homo sapiens GN=NARS PE=1 SV=1
752	1	UniProt_human	Q8NEC6	65	39797	5	5	4	4	0.53	MTMR1 protein OS=Homo sapiens GN=MTMR1 PE=1 SV=1
753	1	UniProt_human	J3QLN7	65	20396	1	1	1	1	0.23	Cell division control protein 6 homolog (Fragment) OS=Homo sapiens GN=CDC6 PE=1 SV=1
754	1	UniProt_human	E9PGM4	65	75911	1	1	1	1	0.06	1,4-alpha-glucan-branching enzyme OS=Homo sapiens GN=GBE1 PE=1 SV=1
755	1	UniProt_human	P13807	65	83732	3	3	3	3	0.16	Glycogen [starch] synthase, muscle OS=Homo sapiens GN=GYS1 PE=1 SV=2
756	1	UniProt_human	Q66K14	65	140436	1	1	1	1	0.03	TBC1 domain family member 9B OS=Homo sapiens GN=TBC1D9B PE=1 SV=3
757	1	UniProt_human	O43148	65	54809	2	2	2	2	0.17	mRNA cap guanine-N7 methyltransferase OS=Homo sapiens GN=RNMT PE=1 SV=1
758	1	UniProt_human	O95352-2	64	74954	2	2	2	2	0.12	Isoform 2 of Ubiquitin-like modifier-activating enzyme ATG7 OS=Homo sapiens GN=ATG7
759	1	UniProt_human	Q9H6X2	64	62749	1	1	1	1	0.07	Anthrax toxin receptor 1 OS=Homo sapiens GN=ANTXR1 PE=1 SV=2
760	1	UniProt_human	Q5M9Q1	64	46284	1	1	1	1	0.1	NKAP-like protein OS=Homo sapiens GN=NKAPL PE=2 SV=3
761	1	UniProt_human	S4R398	64	22056	1	1	1	1	0.21	Transportin-1 (Fragment) OS=Homo sapiens GN=TNPO1 PE=1 SV=1
762	1	UniProt_human	H3BMF4	64	61067	1	1	1	1	0.07	Protein spinster homolog 1 OS=Homo sapiens GN=SPNS1 PE=1 SV=1
763	1	UniProt_human	P54727	64	43145	2	2	1	1	0.1	UV excision repair protein RAD23 homolog B OS=Homo sapiens GN=RAD23B PE=1 SV=1
764	1	UniProt_human	Q96T76	64	113217	1	1	1	1	0.04	MMS19 nucleotide excision repair protein homolog OS=Homo sapiens GN=MMS19 PE=1 SV=2
765	1	UniProt_human	H7BXY3	64	130469	1	1	1	1	0.03	Putative ATP-dependent RNA helicase DHX30 OS=Homo sapiens GN=DHX30 PE=1 SV=1
766	1	UniProt_human	K7EJ34	64	14321	2	2	1	1	0.34	Protein FAM134C OS=Homo sapiens GN=FAM134C PE=1 SV=1
767	1	UniProt_human	Q9H7S9	64	58186	1	1	1	1	0.08	Zinc finger protein 703 OS=Homo sapiens GN=ZNF703 PE=1 SV=1
768	1	UniProt_human	Q5T4U5	64	50238	1	1	1	1	0.09	Acyl-Coenzyme A dehydrogenase, C-4 to C-12 straight chain, isoform CRA_a OS=Homo sapiens GN=ACADM PE=1 SV=1
769	1	UniProt_human	Q86XZ4	64	59508	2	2	2	2	0.15	Spermatogenesis-associated serine-rich protein 2 OS=Homo sapiens GN=SPATS2 PE=1 SV=1
770	1	UniProt_human	A0A087WUT0	64	58648	3	3	3	3	0.24	Myelin expression factor 2 OS=Homo sapiens GN=MYEF2 PE=1 SV=1
771	1	UniProt_human	H0Y2V1	64	48617	1	1	1	1	0.09	Microtubule-associated protein (Fragment) OS=Homo sapiens GN=MAP4 PE=1 SV=1
71	2	UniProt_human	A0A075B7D9	63	48809	3	3	3	3	0.3	TATA-binding protein-associated factor 2N OS=Homo sapiens GN=TAF15 PE=1 SV=1
772	1	UniProt_human	A0A0A0MRL6	63	84302	1	1	1	1	0.05	Actin-binding LIM protein 1 OS=Homo sapiens GN=ABLIM1 PE=1 SV=1
773	1	UniProt_human	H3BTB7	63	56790	3	3	2	2	0.16	Probable glutamate--tRNA ligase, mitochondrial OS=Homo sapiens GN=EARS2 PE=1 SV=1
774	1	UniProt_human	F5H008	63	67563	3	3	3	3	0.21	Vacuolar protein sorting-associated protein 33B OS=Homo sapiens GN=VPS33B PE=1 SV=1
775	1	UniProt_human	Q96EA4	63	70128	1	1	1	1	0.06	Protein Spindly OS=Homo sapiens GN=SPDL1 PE=1 SV=2
776	1	UniProt_human	I3L1P8	63	32162	1	1	1	1	0.14	Mitochondrial 2-oxoglutarate/malate carrier protein (Fragment) OS=Homo sapiens GN=SLC25A11 PE=1 SV=1
777	1	UniProt_human	J3KPM9	62	83308	1	1	1	1	0.05	Signal transducer and activator of transcription OS=Homo sapiens GN=STAT1 PE=1 SV=1
778	1	UniProt_human	Q86UL3	62	52037	1	1	1	1	0.08	Glycerol-3-phosphate acyltransferase 4 OS=Homo sapiens GN=GPAT4 PE=1 SV=1
779	1	UniProt_human	A0A0G2JMZ8	62	59092	2	2	2	2	0.15	Occludin OS=Homo sapiens GN=OCLN PE=1 SV=1
780	1	UniProt_human	Q7Z7L7	62	88113	4	4	4	4	0.21	Protein zer-1 homolog OS=Homo sapiens GN=ZER1 PE=1 SV=1
781	1	UniProt_human	Q9NQR7	62	79691	2	2	1	1	0.05	Coiled-coil domain-containing protein 177 OS=Homo sapiens GN=CCDC177 PE=2 SV=3
782	1	UniProt_human	C9J7E8	62	74419	1	1	1	1	0.06	Muskelin OS=Homo sapiens GN=MKLN1 PE=1 SV=1
783	1	UniProt_human	E9PJ36	62	28390	1	1	1	1	0.16	Vacuolar protein sorting-associated protein 51 homolog (Fragment) OS=Homo sapiens GN=VPS51 PE=1 SV=1
784	1	UniProt_human	C9JIG9	62	51824	2	2	1	1	0.08	Serine/threonine-protein kinase OSR1 OS=Homo sapiens GN=OXSR1 PE=1 SV=1
785	1	UniProt_human	Q01650	62	54974	3	3	3	3	0.26	Large neutral amino acids transporter small subunit 1 OS=Homo sapiens GN=SLC7A5 PE=1 SV=2
786	1	UniProt_human	A0A0A0MTN0	61	88448	2	2	2	2	0.1	Cullin-2 OS=Homo sapiens GN=CUL2 PE=1 SV=1
787	1	UniProt_human	H0YJW4	61	48109	1	1	1	1	0.09	Cochlin (Fragment) OS=Homo sapiens GN=COCH PE=1 SV=1
788	1	UniProt_human	P08236	61	74685	3	3	3	3	0.19	Beta-glucuronidase OS=Homo sapiens GN=GUSB PE=1 SV=2
789	1	UniProt_human	P06213	61	156232	1	1	1	1	0.03	Insulin receptor OS=Homo sapiens GN=INSR PE=1 SV=4
790	1	UniProt_human	A0A1B0GTB8	61	71137	2	2	1	1	0.06	Carnitine O-palmitoyltransferase 2, mitochondrial OS=Homo sapiens GN=CPT2 PE=4 SV=1
791	1	UniProt_human	A0A087WV86	61	69082	1	1	1	1	0.06	Protein aurora borealis OS=Homo sapiens GN=BORA PE=1 SV=1
792	1	UniProt_human	Q5SY38	61	29310	1	1	1	1	0.15	Eukaryotic translation initiation factor 2D (Fragment) OS=Homo sapiens GN=EIF2D PE=1 SV=8
793	1	UniProt_human	E7EV84	61	32338	1	1	1	1	0.14	Beclin-1 OS=Homo sapiens GN=BECN1 PE=1 SV=1
794	1	UniProt_human	Q8WUY9	61	61731	1	1	1	1	0.07	DEP domain-containing protein 1B OS=Homo sapiens GN=DEPDC1B PE=1 SV=2
795	1	UniProt_human	Q6WRX3	60	85752	2	2	2	2	0.1	Protein zyg-11 homolog A OS=Homo sapiens GN=ZYG11A PE=2 SV=3
796	1	UniProt_human	E7ENV7	60	62194	2	2	1	1	0.07	Copine-8 OS=Homo sapiens GN=CPNE8 PE=1 SV=2
797	1	UniProt_human	A0A087WUJ7	60	25885	1	1	1	1	0.18	Uncharacterized protein OS=Homo sapiens PE=4 SV=1
798	1	UniProt_human	D6RAA6	60	25207	1	1	1	1	0.18	Transmembrane protein 33 (Fragment) OS=Homo sapiens GN=TMEM33 PE=1 SV=1
799	1	UniProt_human	C9J3F6	60	67491	1	1	1	1	0.06	TBC1 domain family member 5 OS=Homo sapiens GN=TBC1D5 PE=1 SV=1
283	3	UniProt_human	Q9NZN3	59	60849	4	4	3	3	0.23	EH domain-containing protein 3 OS=Homo sapiens GN=EHD3 PE=1 SV=2
800	1	UniProt_human	F5H6I7	59	58736	1	1	1	1	0.07	Atlastin-3 OS=Homo sapiens GN=ATL3 PE=1 SV=1
801	1	UniProt_human	Q9H2G2	59	142607	1	1	1	1	0.03	STE20-like serine/threonine-protein kinase OS=Homo sapiens GN=SLK PE=1 SV=1
802	1	UniProt_human	Q15291	59	59116	1	1	1	1	0.07	Retinoblastoma-binding protein 5 OS=Homo sapiens GN=RBBP5 PE=1 SV=2
803	1	UniProt_human	H3BNC0	59	63735	1	1	1	1	0.07	Protein arginine N-methyltransferase 7 OS=Homo sapiens GN=PRMT7 PE=1 SV=1
804	1	UniProt_human	A0A0A0MTI2	59	72242	1	1	1	1	0.06	Adaptor protein with pleckstrin homology and src homology 2 domains, isoform CRA_a OS=Homo sapiens GN=SH2B2 PE=1 SV=1
805	1	UniProt_human	H3BM14	58	71877	2	2	2	2	0.13	NEDD8 ultimate buster 1 OS=Homo sapiens GN=NUB1 PE=1 SV=1
806	1	UniProt_human	H0YMD2	58	15866	1	1	1	1	0.3	Nucleolar and spindle-associated protein 1 (Fragment) OS=Homo sapiens GN=NUSAP1 PE=1 SV=1
807	1	UniProt_human	E5RG31	58	31614	1	1	1	1	0.14	DNA replication licensing factor MCM4 (Fragment) OS=Homo sapiens GN=MCM4 PE=1 SV=8
808	1	UniProt_human	Q9BUK6	58	61796	1	1	1	1	0.07	Protein misato homolog 1 OS=Homo sapiens GN=MSTO1 PE=1 SV=1
809	1	UniProt_human	Q13325	58	55812	1	1	1	1	0.08	Interferon-induced protein with tetratricopeptide repeats 5 OS=Homo sapiens GN=IFIT5 PE=1 SV=1
810	1	UniProt_human	Q5K4L6	58	78594	2	2	2	2	0.11	Long-chain fatty acid transport protein 3 OS=Homo sapiens GN=SLC27A3 PE=2 SV=3
811	1	UniProt_human	O60826	58	70712	2	2	2	2	0.13	Coiled-coil domain-containing protein 22 OS=Homo sapiens GN=CCDC22 PE=1 SV=1
812	1	UniProt_human	K7ENF0	58	5332	1	1	1	1	1.1	Asparagine--tRNA ligase, cytoplasmic OS=Homo sapiens GN=NARS PE=1 SV=1
813	1	UniProt_human	Q9UHR4	57	56847	1	1	1	1	0.08	Brain-specific angiogenesis inhibitor 1-associated protein 2-like protein 1 OS=Homo sapiens GN=BAIAP2L1 PE=1 SV=2
814	1	UniProt_human	Q9P0J1	57	61016	2	2	2	2	0.15	[Pyruvate dehydrogenase [acetyl-transferring]]-phosphatase 1, mitochondrial OS=Homo sapiens GN=PDP1 PE=1 SV=3
815	1	UniProt_human	Q9UBF2	57	97560	1	1	1	1	0.04	Coatomer subunit gamma-2 OS=Homo sapiens GN=COPG2 PE=1 SV=1
816	1	UniProt_human	H7BZZ3	57	33661	1	1	1	1	0.13	Activated CDC42 kinase 1 (Fragment) OS=Homo sapiens GN=TNK2 PE=1 SV=1
817	1	UniProt_human	Q6ZXV5	57	103942	2	2	2	2	0.09	Transmembrane and TPR repeat-containing protein 3 OS=Homo sapiens GN=TMTC3 PE=1 SV=2
818	1	UniProt_human	O00139	57	79905	2	2	2	2	0.11	Kinesin-like protein KIF2A OS=Homo sapiens GN=KIF2A PE=1 SV=3
819	1	UniProt_human	P25311	57	34237	1	1	1	1	0.13	Zinc-alpha-2-glycoprotein OS=Homo sapiens GN=AZGP1 PE=1 SV=2
820	1	UniProt_human	Q9NW75	57	58907	2	2	2	2	0.15	G patch domain-containing protein 2 OS=Homo sapiens GN=GPATCH2 PE=1 SV=1
821	1	UniProt_human	P33908	57	72922	1	1	1	1	0.06	Mannosyl-oligosaccharide 1,2-alpha-mannosidase IA OS=Homo sapiens GN=MAN1A1 PE=1 SV=3
822	1	UniProt_human	A0A075B6F6	57	30143	3	3	3	3	0.52	Minor histocompatibility antigen H13 (Fragment) OS=Homo sapiens GN=HM13 PE=1 SV=1
823	1	UniProt_human	Q6VY07	57	104833	1	1	1	1	0.04	Phosphofurin acidic cluster sorting protein 1 OS=Homo sapiens GN=PACS1 PE=1 SV=2
824	1	UniProt_human	Q86XA6	57	24271	2	2	1	1	0.19	B4GALT1 protein OS=Homo sapiens GN=B4GALT1 PE=1 SV=1
825	1	UniProt_human	A6NKB8	57	68125	3	3	3	3	0.21	Aminopeptidase B OS=Homo sapiens GN=RNPEP PE=1 SV=1
826	1	UniProt_human	H0YDQ8	57	51166	1	1	1	1	0.09	CREB-regulated transcription coactivator 2 (Fragment) OS=Homo sapiens GN=CRTC2 PE=1 SV=2
827	1	UniProt_human	Q6P2H3	56	85586	4	4	3	3	0.16	Centrosomal protein of 85 kDa OS=Homo sapiens GN=CEP85 PE=1 SV=1
828	1	UniProt_human	H0YLH3	56	48970	2	2	2	2	0.19	Geranylgeranyl transferase type-2 subunit alpha OS=Homo sapiens GN=RABGGTA PE=1 SV=1
829	1	UniProt_human	P09960	56	69241	2	2	1	1	0.06	Leukotriene A-4 hydrolase OS=Homo sapiens GN=LTA4H PE=1 SV=2
830	1	UniProt_human	P06730-2	56	28760	1	1	1	1	0.16	Isoform 2 of Eukaryotic translation initiation factor 4E OS=Homo sapiens GN=EIF4E
831	1	UniProt_human	P01042	56	71912	4	4	1	1	0.06	Kininogen-1 OS=Homo sapiens GN=KNG1 PE=1 SV=2
832	1	UniProt_human	Q02539	56	21829	1	1	1	1	0.21	Histone H1.1 OS=Homo sapiens GN=HIST1H1A PE=1 SV=3
833	1	UniProt_human	B1ALD9	56	90087	1	1	1	1	0.05	Periostin OS=Homo sapiens GN=POSTN PE=1 SV=1
834	1	UniProt_human	E7ESJ7	56	47927	2	2	2	2	0.19	Protein FAM114A2 OS=Homo sapiens GN=FAM114A2 PE=1 SV=1
835	1	UniProt_human	I3L072	56	60795	1	1	1	1	0.07	Uncharacterized protein C17orf80 OS=Homo sapiens GN=C17orf80 PE=1 SV=1
836	1	UniProt_human	Q6NUQ4	56	77101	1	1	1	1	0.06	Transmembrane protein 214 OS=Homo sapiens GN=TMEM214 PE=1 SV=2
538	2	UniProt_human	Q13177	55	58006	2	2	2	2	0.16	Serine/threonine-protein kinase PAK 2 OS=Homo sapiens GN=PAK2 PE=1 SV=3
837	1	UniProt_human	E7ETR0	55	34760	2	2	2	2	0.27	RuvB-like helicase OS=Homo sapiens GN=RUVBL1 PE=1 SV=1
838	1	UniProt_human	Q8TAA9	55	59937	3	3	3	3	0.24	Vang-like protein 1 OS=Homo sapiens GN=VANGL1 PE=1 SV=1
839	1	UniProt_human	P30419	55	56770	2	2	2	2	0.16	Glycylpeptide N-tetradecanoyltransferase 1 OS=Homo sapiens GN=NMT1 PE=1 SV=2
840	1	UniProt_human	P81605	55	11277	1	1	1	1	0.44	Dermcidin OS=Homo sapiens GN=DCD PE=1 SV=2
841	1	UniProt_human	H0YCG9	55	23054	1	1	1	1	0.2	Protein wntless homolog (Fragment) OS=Homo sapiens GN=WLS PE=1 SV=1
842	1	UniProt_human	Q8IZ13	55	68283	1	1	1	1	0.06	Protein ZBED8 OS=Homo sapiens GN=ZBED8 PE=1 SV=1
844	1	UniProt_human	B5MCI0	55	47694	2	2	2	2	0.19	Smoothelin OS=Homo sapiens GN=SMTN PE=1 SV=1
845	1	UniProt_human	Q5VZE5	55	83584	2	2	2	2	0.11	N-alpha-acetyltransferase 35, NatC auxiliary subunit OS=Homo sapiens GN=NAA35 PE=1 SV=1
846	1	UniProt_human	G3V153	55	70310	1	1	1	1	0.06	Caprin-1 OS=Homo sapiens GN=CAPRIN1 PE=1 SV=1
847	1	UniProt_human	A9Z1Z3	55	200854	1	1	1	1	0.02	Fer-1-like protein 4 OS=Homo sapiens GN=FER1L4 PE=2 SV=1
848	1	UniProt_human	A0A087X295	54	124921	2	2	2	2	0.07	WD repeat-containing protein 6 OS=Homo sapiens GN=WDR6 PE=1 SV=1
849	1	UniProt_human	Q9NVR0	54	80097	1	1	1	1	0.05	Kelch-like protein 11 OS=Homo sapiens GN=KLHL11 PE=1 SV=1
850	1	UniProt_human	C9JV50	54	21416	1	1	1	1	0.22	Phosphatidylinositide phosphatase SAC1 (Fragment) OS=Homo sapiens GN=SACM1L PE=1 SV=1
851	1	UniProt_human	P30837	54	57170	1	1	1	1	0.08	Aldehyde dehydrogenase X, mitochondrial OS=Homo sapiens GN=ALDH1B1 PE=1 SV=3
852	1	UniProt_human	P19419	54	44860	1	1	1	1	0.1	ETS domain-containing protein Elk-1 OS=Homo sapiens GN=ELK1 PE=1 SV=2
853	1	UniProt_human	E7ETY4	54	78404	2	2	2	2	0.11	Serine/threonine-protein kinase MARK2 OS=Homo sapiens GN=MARK2 PE=1 SV=1
854	1	UniProt_human	E7ET15	54	118175	2	2	2	2	0.07	U2 snRNP-associated SURP motif-containing protein OS=Homo sapiens GN=U2SURP PE=1 SV=1
855	1	UniProt_human	H0YB35	54	30568	1	1	1	1	0.15	Ras GTPase-activating protein 4 (Fragment) OS=Homo sapiens GN=RASA4 PE=1 SV=1
856	1	UniProt_human	Q96BY7	54	232616	1	1	1	1	0.02	Autophagy-related protein 2 homolog B OS=Homo sapiens GN=ATG2B PE=1 SV=5
857	1	UniProt_human	G5E9H3	54	37594	1	1	1	1	0.12	Tetratricopeptide repeat protein 31 OS=Homo sapiens GN=TTC31 PE=1 SV=1
858	1	UniProt_human	H3BN65	54	7137	1	1	1	1	0.76	Cerebellar degeneration-related protein 2 (Fragment) OS=Homo sapiens GN=CDR2 PE=1 SV=8
859	1	UniProt_human	Q9P258	53	56049	2	2	2	2	0.16	Protein RCC2 OS=Homo sapiens GN=RCC2 PE=1 SV=2
860	1	UniProt_human	A0A024R6I7	53	46679	1	1	1	1	0.09	Alpha-1-antitrypsin OS=Homo sapiens GN=SERPINA1 PE=1 SV=1
861	1	UniProt_human	Q5H9R7	53	97608	4	4	3	3	0.14	Serine/threonine-protein phosphatase 6 regulatory subunit 3 OS=Homo sapiens GN=PPP6R3 PE=1 SV=2
862	1	UniProt_human	P11166	53	54049	1	1	1	1	0.08	Solute carrier family 2, facilitated glucose transporter member 1 OS=Homo sapiens GN=SLC2A1 PE=1 SV=2
863	1	UniProt_human	B8ZZG1	53	48727	1	1	1	1	0.09	MAGUK p55 subfamily member 6 OS=Homo sapiens GN=MPP6 PE=1 SV=1
864	1	UniProt_human	Q86Z20	53	58591	1	1	1	1	0.07	Coiled-coil domain-containing protein 125 OS=Homo sapiens GN=CCDC125 PE=1 SV=2
865	1	UniProt_human	G3V553	53	41870	1	1	1	1	0.11	G patch domain-containing protein 2-like OS=Homo sapiens GN=GPATCH2L PE=1 SV=1
866	1	UniProt_human	F2Z2Y1	53	70082	1	1	1	1	0.06	Eyes absent homolog OS=Homo sapiens GN=EYA4 PE=1 SV=1
867	1	UniProt_human	M0R0F9	53	49682	2	2	2	2	0.19	Cdc42-interacting protein 4 OS=Homo sapiens GN=TRIP10 PE=1 SV=1
843	1	UniProt_human	Q14694	52	87080	2	2	2	2	0.1	Ubiquitin carboxyl-terminal hydrolase 10 OS=Homo sapiens GN=USP10 PE=1 SV=2
868	1	UniProt_human	Q8IYS2	52	69113	1	1	1	1	0.06	Uncharacterized protein KIAA2013 OS=Homo sapiens GN=KIAA2013 PE=1 SV=1
869	1	UniProt_human	A0A0U1RRM6	52	87346	1	1	1	1	0.05	Protein enabled homolog OS=Homo sapiens GN=ENAH PE=1 SV=1
870	1	UniProt_human	Q12906	52	95279	3	3	3	3	0.14	Interleukin enhancer-binding factor 3 OS=Homo sapiens GN=ILF3 PE=1 SV=3
871	1	UniProt_human	Q5T760	52	42291	3	3	3	3	0.35	Serine/arginine-rich-splicing factor 11 (Fragment) OS=Homo sapiens GN=SRSF11 PE=1 SV=1
872	1	UniProt_human	E9PM19	52	112891	1	1	1	1	0.04	Tyrosine-protein kinase OS=Homo sapiens GN=TYK2 PE=1 SV=1
873	1	UniProt_human	A0A087WXY1	52	18192	1	1	1	1	0.26	Leucine--tRNA ligase, cytoplasmic OS=Homo sapiens GN=LARS PE=1 SV=1
874	1	UniProt_human	Q9H8Y8	52	47116	1	1	1	1	0.09	Golgi reassembly-stacking protein 2 OS=Homo sapiens GN=GORASP2 PE=1 SV=3
875	1	UniProt_human	A0A0A0MSP3	51	29634	1	1	1	1	0.15	PDZ and LIM domain protein 5 OS=Homo sapiens GN=PDLIM5 PE=1 SV=1
876	1	UniProt_human	Q8N7H5	51	59939	2	2	2	2	0.15	RNA polymerase II-associated factor 1 homolog OS=Homo sapiens GN=PAF1 PE=1 SV=2
877	1	UniProt_human	C9JEH3	51	46792	1	1	1	1	0.09	Angio-associated migratory cell protein OS=Homo sapiens GN=AAMP PE=1 SV=1
878	1	UniProt_human	B1AXG1	51	26218	2	2	1	1	0.17	Ribosomal protein S6 kinase alpha-3 (Fragment) OS=Homo sapiens GN=RPS6KA3 PE=1 SV=1
879	1	UniProt_human	Q969M3	51	27971	2	2	2	2	0.35	Protein YIPF5 OS=Homo sapiens GN=YIPF5 PE=1 SV=1
880	1	UniProt_human	Q9BRR8	51	103282	1	1	1	1	0.04	G patch domain-containing protein 1 OS=Homo sapiens GN=GPATCH1 PE=1 SV=1
881	1	UniProt_human	Q68CZ6	51	69607	3	3	3	3	0.2	HAUS augmin-like complex subunit 3 OS=Homo sapiens GN=HAUS3 PE=1 SV=1
882	1	UniProt_human	P62805	51	11360	1	1	1	1	0.44	Histone H4 OS=Homo sapiens GN=HIST1H4A PE=1 SV=2
883	1	UniProt_human	A0A0U1RR22	51	51796	1	1	1	1	0.08	Protein kinase C and casein kinase substrate in neurons protein 2 (Fragment) OS=Homo sapiens GN=PACSIN2 PE=1 SV=1
884	1	UniProt_human	O75529	51	66114	1	1	1	1	0.07	TAF5-like RNA polymerase II p300/CBP-associated factor-associated factor 65 kDa subunit 5L OS=Homo sapiens GN=TAF5L PE=1 SV=1
885	1	UniProt_human	K7EKE8	50	22739	1	1	1	1	0.2	Nectin-2 (Fragment) OS=Homo sapiens GN=NECTIN2 PE=1 SV=1
886	1	UniProt_human	Q86TB9	50	86796	1	1	1	1	0.05	Protein PAT1 homolog 1 OS=Homo sapiens GN=PATL1 PE=1 SV=2
887	1	UniProt_human	Q9BY84	50	73056	2	2	2	2	0.12	Dual specificity protein phosphatase 16 OS=Homo sapiens GN=DUSP16 PE=1 SV=1
888	1	UniProt_human	O14773	50	61210	1	1	1	1	0.07	Tripeptidyl-peptidase 1 OS=Homo sapiens GN=TPP1 PE=1 SV=2
889	1	UniProt_human	O95486	50	119674	1	1	1	1	0.04	Protein transport protein Sec24A OS=Homo sapiens GN=SEC24A PE=1 SV=2
890	1	UniProt_human	A0A087WVF1	50	29628	1	1	1	1	0.15	Uncharacterized protein C18orf25 OS=Homo sapiens GN=C18orf25 PE=1 SV=1
891	1	UniProt_human	P55060	50	110346	1	1	1	1	0.04	Exportin-2 OS=Homo sapiens GN=CSE1L PE=1 SV=3
892	1	UniProt_human	A0A087X0M0	50	87828	1	1	1	1	0.05	Coiled-coil domain-containing protein R3HCC1L OS=Homo sapiens GN=R3HCC1L PE=1 SV=1
893	1	UniProt_human	G5E9W2	50	85094	1	1	1	1	0.05	Chondroitin sulfate glucuronyltransferase OS=Homo sapiens GN=CHPF2 PE=1 SV=1
894	1	UniProt_human	E9PJD9	50	10121	1	1	1	1	0.5	60S ribosomal protein L27a OS=Homo sapiens GN=RPL27A PE=1 SV=1
895	1	UniProt_human	A0A0G2JJD3	50	67476	2	2	1	1	0.06	HLA-B associated transcript 5, isoform CRA_b OS=Homo sapiens GN=ABHD16A PE=1 SV=1
896	1	UniProt_human	Q15776	50	65775	1	1	1	1	0.07	Zinc finger protein with KRAB and SCAN domains 8 OS=Homo sapiens GN=ZKSCAN8 PE=1 SV=2
897	1	UniProt_human	M0QXQ9	49	19693	1	1	1	1	0.24	Microtubule-associated protein 1S (Fragment) OS=Homo sapiens GN=MAP1S PE=1 SV=8
898	1	UniProt_human	Q9NXN4	49	56189	2	2	2	2	0.16	Ganglioside-induced differentiation-associated protein 2 OS=Homo sapiens GN=GDAP2 PE=1 SV=1
899	1	UniProt_human	A0A0A0MSN4	49	142330	1	1	1	1	0.03	Angiotensin-converting enzyme OS=Homo sapiens GN=ACE PE=1 SV=1
900	1	UniProt_human	Q99704	49	52359	2	2	2	2	0.18	Docking protein 1 OS=Homo sapiens GN=DOK1 PE=1 SV=1
901	1	UniProt_human	Q8NC60	49	78409	1	1	1	1	0.06	Nitric oxide-associated protein 1 OS=Homo sapiens GN=NOA1 PE=1 SV=2
902	1	UniProt_human	K7EIK4	49	19126	1	1	1	1	0.24	Thimet oligopeptidase (Fragment) OS=Homo sapiens GN=THOP1 PE=1 SV=1
903	1	UniProt_human	P36871	49	61411	1	1	1	1	0.07	Phosphoglucomutase-1 OS=Homo sapiens GN=PGM1 PE=1 SV=3
904	1	UniProt_human	A0A1B0GUA3	49	74736	1	1	1	1	0.06	KIF1-binding protein OS=Homo sapiens GN=KIF1BP PE=4 SV=1
905	1	UniProt_human	Q02878	49	32708	3	3	3	3	0.47	60S ribosomal protein L6 OS=Homo sapiens GN=RPL6 PE=1 SV=3
906	1	UniProt_human	A6NEC2	48	53713	1	1	1	1	0.08	Puromycin-sensitive aminopeptidase-like protein OS=Homo sapiens GN=NPEPPSL1 PE=2 SV=3
907	1	UniProt_human	E5RGW4	48	6858	1	1	1	1	0.79	Nucleophosmin (Fragment) OS=Homo sapiens GN=NPM1 PE=1 SV=1
908	1	UniProt_human	Q9BVI4	48	58431	2	2	1	1	0.08	Nucleolar complex protein 4 homolog OS=Homo sapiens GN=NOC4L PE=1 SV=1
909	1	UniProt_human	A0A0U1RQI6	48	142239	1	1	1	1	0.03	CLIP-associating protein 2 OS=Homo sapiens GN=CLASP2 PE=1 SV=1
910	1	UniProt_human	F5GY55	48	121637	1	1	1	1	0.04	DNA damage-binding protein 1 OS=Homo sapiens GN=DDB1 PE=1 SV=1
911	1	UniProt_human	Q9UKX7	48	50113	2	2	2	2	0.18	Nuclear pore complex protein Nup50 OS=Homo sapiens GN=NUP50 PE=1 SV=2
912	1	UniProt_human	A0A0G2JLP6	48	12709	1	1	1	1	0.39	Sperm-associated antigen 11B OS=Homo sapiens GN=SPAG11B PE=4 SV=1
913	1	UniProt_human	A0A087WSW7	48	80984	4	4	3	3	0.17	Helicase, lymphoid-specific, isoform CRA_d OS=Homo sapiens GN=HELLS PE=1 SV=1
914	1	UniProt_human	Q9UBH6	48	81483	1	1	1	1	0.05	Xenotropic and polytropic retrovirus receptor 1 OS=Homo sapiens GN=XPR1 PE=1 SV=1
915	1	UniProt_human	P30825	48	67594	1	1	1	1	0.06	High affinity cationic amino acid transporter 1 OS=Homo sapiens GN=SLC7A1 PE=1 SV=1
916	1	UniProt_human	A8MUD9	48	24417	1	1	1	1	0.19	60S ribosomal protein L7 OS=Homo sapiens GN=RPL7 PE=1 SV=1
917	1	UniProt_human	Q5SY16	48	79272	1	1	1	1	0.05	Polynucleotide 5'-hydroxyl-kinase NOL9 OS=Homo sapiens GN=NOL9 PE=1 SV=1
918	1	UniProt_human	Q5T2E6	48	78659	2	2	2	2	0.11	UPF0668 protein C10orf76 OS=Homo sapiens GN=C10orf76 PE=1 SV=1
919	1	UniProt_human	E9PHM2	48	96869	1	1	1	1	0.04	Probable leucine--tRNA ligase, mitochondrial OS=Homo sapiens GN=LARS2 PE=1 SV=1
920	1	UniProt_human	H7C213	48	33549	1	1	1	1	0.13	Translation initiation factor IF-2, mitochondrial (Fragment) OS=Homo sapiens GN=MTIF2 PE=1 SV=2
921	1	UniProt_human	D6RD66	47	26781	1	1	1	1	0.17	WD repeat-containing protein 1 (Fragment) OS=Homo sapiens GN=WDR1 PE=1 SV=1
922	1	UniProt_human	Q8IYB8	47	87935	2	2	2	2	0.1	ATP-dependent RNA helicase SUPV3L1, mitochondrial OS=Homo sapiens GN=SUPV3L1 PE=1 SV=1
923	1	UniProt_human	Q9HCM7	47	110839	1	1	1	1	0.04	Fibrosin-1-like protein OS=Homo sapiens GN=FBRSL1 PE=1 SV=4
924	1	UniProt_human	A0A0C4DGH5	47	85355	1	1	1	1	0.05	Cullin-associated NEDD8-dissociated protein 1 (Fragment) OS=Homo sapiens GN=CAND1 PE=1 SV=1
925	1	UniProt_human	P01024	47	187030	1	1	1	1	0.02	Complement C3 OS=Homo sapiens GN=C3 PE=1 SV=2
926	1	UniProt_human	Q9H6F5	47	40211	3	3	2	2	0.23	Coiled-coil domain-containing protein 86 OS=Homo sapiens GN=CCDC86 PE=1 SV=1
927	1	UniProt_human	P49257	47	57513	1	1	1	1	0.08	Protein ERGIC-53 OS=Homo sapiens GN=LMAN1 PE=1 SV=2
928	1	UniProt_human	Q14166	47	74356	2	2	2	2	0.12	Tubulin--tyrosine ligase-like protein 12 OS=Homo sapiens GN=TTLL12 PE=1 SV=2
929	1	UniProt_human	D6W592	47	60061	2	2	2	2	0.15	Heterogeneous nuclear ribonucleoprotein L-like OS=Homo sapiens GN=HNRPLL PE=1 SV=1
930	1	UniProt_human	Q99797	46	80589	2	2	1	1	0.05	Mitochondrial intermediate peptidase OS=Homo sapiens GN=MIPEP PE=1 SV=2
931	1	UniProt_human	H7C2G6	46	6208	1	1	1	1	0.9	Probable 28S rRNA (cytosine-C(5))-methyltransferase (Fragment) OS=Homo sapiens GN=NSUN5 PE=4 SV=1
932	1	UniProt_human	B5MD46	46	47883	1	1	1	1	0.09	TBC1 domain family member 10A OS=Homo sapiens GN=TBC1D10A PE=1 SV=1
933	1	UniProt_human	E9PHA6	46	103122	1	1	1	1	0.04	DNA mismatch repair protein OS=Homo sapiens GN=MSH2 PE=1 SV=1
934	1	UniProt_human	A0A0U1RQF0	46	273026	1	1	1	1	0.02	Fatty acid synthase OS=Homo sapiens GN=FASN PE=1 SV=1
935	1	UniProt_human	Q9C0H5	46	121210	1	1	1	1	0.04	Rho GTPase-activating protein 39 OS=Homo sapiens GN=ARHGAP39 PE=1 SV=2
936	1	UniProt_human	Q92611	46	73721	1	1	1	1	0.06	ER degradation-enhancing alpha-mannosidase-like protein 1 OS=Homo sapiens GN=EDEM1 PE=1 SV=1
937	1	UniProt_human	Q86YZ3	46	282228	1	1	1	1	0.02	Hornerin OS=Homo sapiens GN=HRNR PE=1 SV=2
938	1	UniProt_human	Q9P2B7	46	59439	1	1	1	1	0.07	Cilia- and flagella-associated protein 97 OS=Homo sapiens GN=CFAP97 PE=1 SV=2
939	1	UniProt_human	C9JNW5	46	17532	1	1	1	1	0.27	60S ribosomal protein L24 OS=Homo sapiens GN=RPL24 PE=1 SV=1
940	1	UniProt_human	P04114	46	515283	1	1	1	1	0.01	Apolipoprotein B-100 OS=Homo sapiens GN=APOB PE=1 SV=2
941	1	UniProt_human	A0A0A0MSS3	46	62158	1	1	1	1	0.07	SLAIN motif-containing protein 1 OS=Homo sapiens GN=SLAIN1 PE=1 SV=1
942	1	UniProt_human	Q8TEB7	46	46491	1	1	1	1	0.1	E3 ubiquitin-protein ligase RNF128 OS=Homo sapiens GN=RNF128 PE=1 SV=1
943	1	UniProt_human	A0A024R214	46	69592	1	1	1	1	0.06	Cytoplasmic polyadenylation element binding protein 1, isoform CRA_c OS=Homo sapiens GN=CPEB1 PE=1 SV=1
944	1	UniProt_human	A0A0U1RQQ5	45	22655	2	2	1	1	0.2	Glutamine--tRNA ligase (Fragment) OS=Homo sapiens GN=QARS PE=1 SV=2
945	1	UniProt_human	H3BQM0	45	64654	1	1	1	1	0.07	Non-canonical poly(A) RNA polymerase PAPD5 OS=Homo sapiens GN=PAPD5 PE=1 SV=1
946	1	UniProt_human	H3BRG4	45	44607	1	1	1	1	0.1	Cytochrome b-c1 complex subunit 2, mitochondrial OS=Homo sapiens GN=UQCRC2 PE=1 SV=1
947	1	UniProt_human	P29966	45	31536	1	1	1	1	0.14	Myristoylated alanine-rich C-kinase substrate OS=Homo sapiens GN=MARCKS PE=1 SV=4
948	1	UniProt_human	P20042	45	38364	1	1	1	1	0.12	Eukaryotic translation initiation factor 2 subunit 2 OS=Homo sapiens GN=EIF2S2 PE=1 SV=2
949	1	UniProt_human	H0YA24	45	17360	1	1	1	1	0.27	Pleiotropic regulator 1 (Fragment) OS=Homo sapiens GN=PLRG1 PE=1 SV=1
950	1	UniProt_human	P00734	45	69992	1	1	1	1	0.06	Prothrombin OS=Homo sapiens GN=F2 PE=1 SV=2
951	1	UniProt_human	H7C0I1	44	63252	2	2	1	1	0.07	Late secretory pathway protein AVL9 homolog (Fragment) OS=Homo sapiens GN=AVL9 PE=1 SV=1
952	1	UniProt_human	F8VQF5	44	7382	1	1	1	1	0.72	Rac GTPase-activating protein 1 (Fragment) OS=Homo sapiens GN=RACGAP1 PE=1 SV=1
953	1	UniProt_human	Q9NVC6	44	72845	2	2	1	1	0.06	Mediator of RNA polymerase II transcription subunit 17 OS=Homo sapiens GN=MED17 PE=1 SV=2
954	1	UniProt_human	Q08945	44	81024	1	1	1	1	0.05	FACT complex subunit SSRP1 OS=Homo sapiens GN=SSRP1 PE=1 SV=1
955	1	UniProt_human	H0YN14	44	101425	1	1	1	1	0.04	Importin-4 OS=Homo sapiens GN=IPO4 PE=1 SV=1
956	1	UniProt_human	Q8NG31	43	265224	3	3	3	3	0.05	Protein CASC5 OS=Homo sapiens GN=CASC5 PE=1 SV=3
957	1	UniProt_human	H3BUV8	43	46048	1	1	1	1	0.1	Lysyl oxidase homolog 1 OS=Homo sapiens GN=LOXL1 PE=1 SV=1
958	1	UniProt_human	Q5TG40	43	35368	1	1	1	1	0.13	DNA methyltransferase 1-associated protein 1 (Fragment) OS=Homo sapiens GN=DMAP1 PE=1 SV=1
959	1	UniProt_human	Q5SZF2	43	15864	1	1	1	1	0.3	Protein PRUNE1 (Fragment) OS=Homo sapiens GN=PRUNE1 PE=1 SV=8
960	1	UniProt_human	H0YNU5	43	144381	1	1	1	1	0.03	Bloom syndrome protein OS=Homo sapiens GN=BLM PE=1 SV=1
961	1	UniProt_human	Q8N456	43	29718	1	1	1	1		Leucine-rich repeat-containing protein 18 OS=Homo sapiens GN=LRRC18 PE=2 SV=2
962	1	UniProt_human	Q15386	43	123844	1	1	1	1	0.03	Ubiquitin-protein ligase E3C OS=Homo sapiens GN=UBE3C PE=1 SV=3
963	1	UniProt_human	Q8N720	43	57371	1	1	1	1	0.08	Zinc finger protein 655 OS=Homo sapiens GN=ZNF655 PE=1 SV=3
964	1	UniProt_human	P14735	43	117893	1	1	1	1	0.04	Insulin-degrading enzyme OS=Homo sapiens GN=IDE PE=1 SV=4
965	1	UniProt_human	C9JQG7	43	19264	1	1	1	1	0.24	Chromodomain Y-like protein (Fragment) OS=Homo sapiens GN=CDYL PE=1 SV=1
966	1	UniProt_human	Q96RS0	43	96560	1	1	1	1	0.04	Trimethylguanosine synthase OS=Homo sapiens GN=TGS1 PE=1 SV=3
967	1	UniProt_human	F8W1P7	43	52746	1	1	1	1	0.08	Natural resistance-associated macrophage protein 2 OS=Homo sapiens GN=SLC11A2 PE=1 SV=1
968	1	UniProt_human	A0A1B0GTG1	42	63523	1	1	1	1	0.07	Protein FAM83H-AS1 OS=Homo sapiens GN=FAM83H-AS1 PE=4 SV=1
969	1	UniProt_human	F5H385	42	34542	1	1	1	1	0.13	Zinc transporter ZIP3 OS=Homo sapiens GN=SLC39A3 PE=1 SV=1
970	1	UniProt_human	Q3LIE7	42	49404	2	2	1	1	0.09	Delta(24)-sterol reductase OS=Homo sapiens GN=Nbla03646 PE=1 SV=1
971	1	UniProt_human	O15230	42	399479	1	1	1	1	0.01	Laminin subunit alpha-5 OS=Homo sapiens GN=LAMA5 PE=1 SV=8
972	1	UniProt_human	Q15124	42	62186	1	1	1	1	0.07	Phosphoglucomutase-like protein 5 OS=Homo sapiens GN=PGM5 PE=1 SV=2
973	1	UniProt_human	C9JPP3	42	9655	1	1	1	1	0.53	Histone-binding protein RBBP4 (Fragment) OS=Homo sapiens GN=RBBP4 PE=1 SV=2
974	1	UniProt_human	Q96CS3	42	52591	1	1	1	1	0.08	FAS-associated factor 2 OS=Homo sapiens GN=FAF2 PE=1 SV=2
975	1	UniProt_human	F5H1Y4	42	44763	2	2	2	2	0.21	Golgi-associated PDZ and coiled-coil motif containing protein transcript variant 3 OS=Homo sapiens GN=GOPC PE=1 SV=2
976	1	UniProt_human	A0A0G2JR38	42	81336	2	2	2	2	0.11	Pantothenate kinase 4 OS=Homo sapiens GN=PANK4 PE=1 SV=1
977	1	UniProt_human	Q96RS6	42	66713	2	2	2	2	0.14	NudC domain-containing protein 1 OS=Homo sapiens GN=NUDCD1 PE=1 SV=2
978	1	UniProt_human	A0A096LP51	42	10764	1	1	1	1	0.46	DNA primase large subunit (Fragment) OS=Homo sapiens GN=PRIM2 PE=1 SV=1
979	1	UniProt_human	Q16576-2	42	52282	1	1	1	1	0.08	Isoform 2 of Histone-binding protein RBBP7 OS=Homo sapiens GN=RBBP7
980	1	UniProt_human	A0A087X0X0	42	25640	1	1	1	1	0.18	E3 ubiquitin-protein ligase Midline-1 OS=Homo sapiens GN=MID1 PE=1 SV=1
870	2	UniProt_human	Q96SI9	41	73606	2	2	2	2	0.12	Spermatid perinuclear RNA-binding protein OS=Homo sapiens GN=STRBP PE=1 SV=1
981	1	UniProt_human	H7BY10	41	17792	1	1	1	1	0.26	60S ribosomal protein L23a (Fragment) OS=Homo sapiens GN=RPL23A PE=1 SV=1
982	1	UniProt_human	K7EP90	41	47994	1	1	1	1	0.09	RNA-binding protein 42 OS=Homo sapiens GN=RBM42 PE=1 SV=1
983	1	UniProt_human	P50747	41	80709	1	1	1	1	0.05	Biotin--protein ligase OS=Homo sapiens GN=HLCS PE=1 SV=1
984	1	UniProt_human	Q96EY1	41	52456	1	1	1	1	0.08	DnaJ homolog subfamily A member 3, mitochondrial OS=Homo sapiens GN=DNAJA3 PE=1 SV=2
985	1	UniProt_human	F5GX09	41	38596	1	1	1	1	0.12	Protein FAM76B OS=Homo sapiens GN=FAM76B PE=1 SV=1
986	1	UniProt_human	J3KRN4	41	70424	1	1	1	1	0.06	Mitogen-activated protein kinase kinase kinase 3 OS=Homo sapiens GN=MAP3K3 PE=1 SV=1
987	1	UniProt_human	Q3BDU3	41	74011	1	1	1	1	0.06	PMS1 protein homolog 1 OS=Homo sapiens GN=PMS1 PE=1 SV=1
988	1	UniProt_human	J3QSB4	41	14683	1	1	1	1	0.33	60S ribosomal protein L13 (Fragment) OS=Homo sapiens GN=RPL13 PE=1 SV=1
989	1	UniProt_human	Q08554	41	99924	1	1	1	1	0.04	Desmocollin-1 OS=Homo sapiens GN=DSC1 PE=1 SV=2
990	1	UniProt_human	C9J8Z4	40	32265	1	1	1	1	0.14	Immunoglobulin superfamily member 8 (Fragment) OS=Homo sapiens GN=IGSF8 PE=1 SV=1
991	1	UniProt_human	Q9NSY1	40	129091	1	1	1	1	0.03	BMP-2-inducible protein kinase OS=Homo sapiens GN=BMP2K PE=1 SV=2
992	1	UniProt_human	F8VQZ7	40	52787	1	1	1	1	0.08	Methionine aminopeptidase 2 OS=Homo sapiens GN=METAP2 PE=1 SV=1
993	1	UniProt_human	Q68D85	40	50795	1	1	1	1	0.09	Natural cytotoxicity triggering receptor 3 ligand 1 OS=Homo sapiens GN=NCR3LG1 PE=1 SV=1
994	1	UniProt_human	A0A1B0GUF4	40	37710	1	1	1	1	0.12	Ecotropic viral integration site 5 protein homolog (Fragment) OS=Homo sapiens GN=EVI5 PE=4 SV=1
995	1	UniProt_human	Q9NRA2	40	54604	1	1	1	1	0.08	Sialin OS=Homo sapiens GN=SLC17A5 PE=1 SV=2
996	1	UniProt_human	A0A0J9YX62	40	36635	1	1	1	1	0.12	DnaJ homolog subfamily B member 6 OS=Homo sapiens GN=DNAJB6 PE=1 SV=1
997	1	UniProt_human	A0MZ66	40	71596	1	1	1	1	0.06	Shootin-1 OS=Homo sapiens GN=SHTN1 PE=1 SV=4
998	1	UniProt_human	Q3KQV9	40	56994	1	1	1	1	0.08	UDP-N-acetylhexosamine pyrophosphorylase-like protein 1 OS=Homo sapiens GN=UAP1L1 PE=1 SV=2
999	1	UniProt_human	G0XQ39	40	88591	1	1	1	1	0.05	STIM1L OS=Homo sapiens GN=STIM1 PE=1 SV=1
1000	1	UniProt_human	B1ALD0	40	64533	1	1	1	1	0.07	AP complex subunit beta OS=Homo sapiens GN=AP4B1 PE=1 SV=1
1001	1	UniProt_human	H0YAF7	40	31699	1	1	1	1	0.14	Neurolysin, mitochondrial (Fragment) OS=Homo sapiens GN=NLN PE=1 SV=2
1002	1	UniProt_human	I3NI22	40	21700	1	1	1	1	0.21	N-sulphoglucosamine sulphohydrolase (Fragment) OS=Homo sapiens GN=SGSH PE=1 SV=1
1003	1	UniProt_human	G3V167	39	60177	1	1	1	1	0.07	Poly [ADP-ribose] polymerase OS=Homo sapiens GN=PARP2 PE=1 SV=1
1004	1	UniProt_human	K7EQY5	39	56305	1	1	1	1	0.08	Tyrosine-protein kinase OS=Homo sapiens GN=MATK PE=1 SV=1
1005	1	UniProt_human	H0YF00	38	13229	1	1	1	1	0.37	Bcl-2-associated transcription factor 1 (Fragment) OS=Homo sapiens GN=BCLAF1 PE=1 SV=1
1006	1	UniProt_human	A0A087WT67	38	72612	1	1	1	1	0.06	Zinc finger protein 195 OS=Homo sapiens GN=ZNF195 PE=1 SV=1
1007	1	UniProt_human	P47914	38	17741	1	1	1	1	0.26	60S ribosomal protein L29 OS=Homo sapiens GN=RPL29 PE=1 SV=2
1008	1	UniProt_human	H0YC56	38	16165	1	1	1	1	0.29	Alpha-1,3-mannosyl-glycoprotein 4-beta-N-acetylglucosaminyltransferase B (Fragment) OS=Homo sapiens GN=MGAT4B PE=1 SV=1
1009	1	UniProt_human	A0A0R4J2F6	38	48018	1	1	1	1	0.09	Interferon-related developmental regulator 2 OS=Homo sapiens GN=IFRD2 PE=1 SV=1
1010	1	UniProt_human	K7EK59	38	17375	1	1	1	1	0.27	Peroxisomal membrane protein PEX14 (Fragment) OS=Homo sapiens GN=PEX14 PE=1 SV=1
1011	1	UniProt_human	Q5TB53	38	29862	1	1	1	1	0.15	Transmembrane 9 superfamily member (Fragment) OS=Homo sapiens GN=TM9SF3 PE=1 SV=8
1012	1	UniProt_human	Q13724	37	91861	1	1	1	1	0.05	Mannosyl-oligosaccharide glucosidase OS=Homo sapiens GN=MOGS PE=1 SV=5
1013	1	UniProt_human	Q9NRH2	37	84223	2	2	2	2	0.11	SNF-related serine/threonine-protein kinase OS=Homo sapiens GN=SNRK PE=1 SV=2
1014	1	UniProt_human	Q8IWZ6	37	80302	1	1	1	1	0.05	Bardet-Biedl syndrome 7 protein OS=Homo sapiens GN=BBS7 PE=1 SV=2
1015	1	UniProt_human	I3L1L3	37	140155	1	1	1	1	0.03	Myb-binding protein 1A (Fragment) OS=Homo sapiens GN=MYBBP1A PE=1 SV=1
1016	1	UniProt_human	Q8TAM1	37	80785	1	1	1	1	0.05	Bardet-Biedl syndrome 10 protein OS=Homo sapiens GN=BBS10 PE=1 SV=2
1017	1	UniProt_human	H7C5S6	37	20013	1	1	1	1	0.23	Leucine-rich repeat and WD repeat-containing protein 1 (Fragment) OS=Homo sapiens GN=LRWD1 PE=1 SV=1
1018	1	UniProt_human	B3KRF7	37	39299	1	1	1	1	0.11	Zinc finger protein with KRAB and SCAN domains 1 OS=Homo sapiens GN=ZKSCAN1 PE=1 SV=1
1019	1	UniProt_human	H7BZM7	37	47609	1	1	1	1	0.09	Zinc finger protein ZPR1 (Fragment) OS=Homo sapiens GN=ZPR1 PE=1 SV=1
1020	1	UniProt_human	A0A087X0W2	36	32564	1	1	1	1	0.14	Neurofilament light polypeptide OS=Homo sapiens GN=NEFL PE=1 SV=1
1021	1	UniProt_human	M0R0L4	36	14172	1	1	1	1	0.34	Uncharacterized protein (Fragment) OS=Homo sapiens PE=4 SV=1
1022	1	UniProt_human	A0A088AWN2	36	67433	2	2	2	2	0.13	WD repeat-containing protein 20 OS=Homo sapiens GN=WDR20 PE=1 SV=1
1023	1	UniProt_human	Q9H6R7	36	79086	1	1	1	1	0.06	WD repeat and coiled-coil-containing protein OS=Homo sapiens GN=WDCP PE=1 SV=1
1024	1	UniProt_human	A0A0C4DH01	36	75725	1	1	1	1	0.06	DNA-directed RNA polymerase III subunit RPC5 OS=Homo sapiens GN=POLR3E PE=1 SV=1
1025	1	UniProt_human	Q9UQ03	36	54918	1	1	1	1	0.08	Coronin-2B OS=Homo sapiens GN=CORO2B PE=1 SV=4
1026	1	UniProt_human	M0QYC7	36	10554	1	1	1	1	0.48	RNA polymerase II-associated factor 1 homolog (Fragment) OS=Homo sapiens GN=PAF1 PE=1 SV=1
1027	1	UniProt_human	P22314	36	117774	1	1	1	1	0.04	Ubiquitin-like modifier-activating enzyme 1 OS=Homo sapiens GN=UBA1 PE=1 SV=3
1028	1	UniProt_human	F5GWF6	35	56771	1	1	1	1	0.08	T-complex protein 1 subunit beta OS=Homo sapiens GN=CCT2 PE=1 SV=2
1029	1	UniProt_human	Q9BYC5	35	66474	1	1	1	1	0.07	Alpha-(1,6)-fucosyltransferase OS=Homo sapiens GN=FUT8 PE=1 SV=2
1030	1	UniProt_human	E5RK69	35	51744	1	1	1	1	0.09	Annexin OS=Homo sapiens GN=ANXA6 PE=1 SV=1
1031	1	UniProt_human	A0A0C4DFQ2	35	55945	1	1	1	1	0.08	Zinc finger and BTB domain-containing protein 34 OS=Homo sapiens GN=ZBTB34 PE=1 SV=1
1032	1	UniProt_human	M0R0K9	35	48404	1	1	1	1	0.09	Transcription intermediary factor 1-beta (Fragment) OS=Homo sapiens GN=TRIM28 PE=1 SV=1
1033	1	UniProt_human	O75306-2	34	51818	1	1	1	1	0.08	Isoform 2 of NADH dehydrogenase [ubiquinone] iron-sulfur protein 2, mitochondrial OS=Homo sapiens GN=NDUFS2
1034	1	UniProt_human	Q96GM8	34	56512	1	1	1	1	0.08	Target of EGR1 protein 1 OS=Homo sapiens GN=TOE1 PE=1 SV=1
1035	1	UniProt_human	F5GYK3	34	18414	1	1	1	1	0.25	T-cell surface glycoprotein CD5 (Fragment) OS=Homo sapiens GN=CD5 PE=1 SV=1
1036	1	UniProt_human	P28300	34	46915	1	1	1	1	0.09	Protein-lysine 6-oxidase OS=Homo sapiens GN=LOX PE=1 SV=2
1037	1	UniProt_human	D6RAB5	34	17693	1	1	1	1	0.27	Microfibrillar-associated protein 3-like (Fragment) OS=Homo sapiens GN=MFAP3L PE=4 SV=8
1038	1	UniProt_human	Q9Y448-3	34	26570	1	1	1	1	0.17	Isoform 3 of Small kinetochore-associated protein OS=Homo sapiens GN=KNSTRN
1039	1	UniProt_human	Q15797	33	52226	1	1	1	1	0.08	Mothers against decapentaplegic homolog 1 OS=Homo sapiens GN=SMAD1 PE=1 SV=1
1040	1	UniProt_human	G5E9F8	33	60318	1	1	1	1	0.07	Protein S (Alpha), isoform CRA_b OS=Homo sapiens GN=PROS1 PE=1 SV=1
1041	1	UniProt_human	Q6ZN04	31	58796	1	1	1	1	0.07	RNA-binding protein MEX3B OS=Homo sapiens GN=MEX3B PE=1 SV=1
1042	1	UniProt_human	Q16394	31	86200	1	1	1	1	0.05	Exostosin-1 OS=Homo sapiens GN=EXT1 PE=1 SV=2
1043	1	UniProt_human	P52594	31	58224	1	1	1	1	0.08	Arf-GAP domain and FG repeat-containing protein 1 OS=Homo sapiens GN=AGFG1 PE=1 SV=2
1044	1	UniProt_human	H0YA83	30	19511	1	1	1	1	0.24	Beta-hexosaminidase subunit beta (Fragment) OS=Homo sapiens GN=HEXB PE=1 SV=1
1045	1	UniProt_human	Q8N865	28	68421	1	1	1	1	0.06	Uncharacterized protein C7orf31 OS=Homo sapiens GN=C7orf31 PE=1 SV=3
1046	1	UniProt_human	P22102	27	107699	1	1	1	1	0.04	Trifunctional purine biosynthetic protein adenosine-3 OS=Homo sapiens GN=GART PE=1 SV=1
1047	1	UniProt_human	Q9H0H3	24	65881	1	1	1	1	0.07	Kelch-like protein 25 OS=Homo sapiens GN=KLHL25 PE=1 SV=1
1048	1	UniProt_human	Q96S55	23	72088	1	1	1	1	0.06	ATPase WRNIP1 OS=Homo sapiens GN=WRNIP1 PE=1 SV=2
