# Supplementary material for: FER-mediated phosphorylation and PIK3R2 recruitment on IRS4 promotes AKT activation and tumorigenesis in ovarian cancer cells
Source: eLife. 2022 May 12;11:e76183. doi: 10.7554/eLife.76183 (PMC9098222; doi:10.7554/eLife.76183)
Supplement: Supplementary file 4. — Potential FER interactome between 75– and 100 kDa is shown in this file. [file elife-76183-supp4.xlsx]

## Sheet: Sheet1
Family	M	DB	Accession	Score	Mass	Matches	Match(sig)	Sequences	Seq(sig)	↓emPAI	Description
1	1	UniProt_human	P55072	7611	89266	286	286	37	37	11.44	Transitional endoplasmic reticulum ATPase OS=Homo sapiens GN=VCP PE=1 SV=4
2	1	UniProt_human	P16591	5458	94578	199	199	27	27	3.81	Tyrosine-protein kinase Fer OS=Homo sapiens GN=FER PE=1 SV=2
3	1	UniProt_human	P13645	4687	58792	155	155	30	30	22.75	Keratin, type I cytoskeletal 10 OS=Homo sapiens GN=KRT10 PE=1 SV=6
4	1	UniProt_human	P08238	4533	83212	180	180	32	32	5.27	Heat shock protein HSP 90-beta OS=Homo sapiens GN=HSP90AB1 PE=1 SV=4
5	1	UniProt_human	P04264	4155	65999	152	152	35	35	16.95	Keratin, type II cytoskeletal 1 OS=Homo sapiens GN=KRT1 PE=1 SV=6
5	2	UniProt_human	P35908	3998	65393	128	128	37	37	13.26	Keratin, type II cytoskeletal 2 epidermal OS=Homo sapiens GN=KRT2 PE=1 SV=2
3	2	UniProt_human	P35527	3608	62027	114	114	31	31	10.68	Keratin, type I cytoskeletal 9 OS=Homo sapiens GN=KRT9 PE=1 SV=3
6	1	UniProt_human	P33993	3527	81257	140	140	31	31	4.32	DNA replication licensing factor MCM7 OS=Homo sapiens GN=MCM7 PE=1 SV=4
7	1	UniProt_human	P53618	3458	107074	156	156	36	36	4.29	Coatomer subunit beta OS=Homo sapiens GN=COPB1 PE=1 SV=3
4	2	UniProt_human	P07900	3440	84607	149	149	31	31	4.24	Heat shock protein HSP 90-alpha OS=Homo sapiens GN=HSP90AA1 PE=1 SV=5
8	1	UniProt_human	O14980	3440	123306	126	126	30	30	2.01	Exportin-1 OS=Homo sapiens GN=XPO1 PE=1 SV=1
9	1	UniProt_human	P05023	3246	112824	104	104	31	31	2.6	Sodium/potassium-transporting ATPase subunit alpha-1 OS=Homo sapiens GN=ATP1A1 PE=1 SV=1
10	1	UniProt_human	Q8N1F7	3223	93430	118	118	30	30	2.91	Nuclear pore complex protein Nup93 OS=Homo sapiens GN=NUP93 PE=1 SV=2
11	1	UniProt_human	O14654	3066	133685	112	112	31	31	1.86	Insulin receptor substrate 4 OS=Homo sapiens GN=IRS4 PE=1 SV=1
12	1	UniProt_human	P13639	2942	95277	116	116	29	29	2.81	Elongation factor 2 OS=Homo sapiens GN=EEF2 PE=1 SV=4
13	1	UniProt_human	O43707	2880	104788	113	113	37	37	3.86	Alpha-actinin-4 OS=Homo sapiens GN=ACTN4 PE=1 SV=2
14	1	UniProt_human	P56192	2821	101052	95	95	21	21	1.63	Methionine--tRNA ligase, cytoplasmic OS=Homo sapiens GN=MARS PE=1 SV=2
15	1	UniProt_human	P11586	2559	101495	116	116	34	34	3.33	C-1-tetrahydrofolate synthase, cytoplasmic OS=Homo sapiens GN=MTHFD1 PE=1 SV=3
16	1	UniProt_human	Q16891-2	2547	82574	105	105	36	36	5.69	Isoform 2 of MICOS complex subunit MIC60 OS=Homo sapiens GN=IMMT
17	1	UniProt_human	O43592	2513	109893	99	99	27	27	2.07	Exportin-T OS=Homo sapiens GN=XPOT PE=1 SV=2
18	1	UniProt_human	Q13263	2336	88493	64	64	20	20	1.61	Transcription intermediary factor 1-beta OS=Homo sapiens GN=TRIM28 PE=1 SV=5
16	2	UniProt_human	Q16891-4	2280	83497	100	100	35	35	5.24	Isoform 4 of MICOS complex subunit MIC60 OS=Homo sapiens GN=IMMT
19	1	UniProt_human	Q9H3U1	2259	103011	79	79	27	27	2.45	Protein unc-45 homolog A OS=Homo sapiens GN=UNC45A PE=1 SV=1
20	1	UniProt_human	O00159-3	2206	119554	80	80	29	29	2.01	Isoform 3 of Unconventional myosin-Ic OS=Homo sapiens GN=MYO1C
21	1	UniProt_human	P43246	2186	104677	73	73	27	27	2.12	DNA mismatch repair protein Msh2 OS=Homo sapiens GN=MSH2 PE=1 SV=1
22	1	UniProt_human	Q14247	2097	61549	75	75	19	19	4.22	Src substrate cortactin OS=Homo sapiens GN=CTTN PE=1 SV=2
23	1	UniProt_human	P54886	2060	87248	107	107	30	30	3.98	Delta-1-pyrroline-5-carboxylate synthase OS=Homo sapiens GN=ALDH18A1 PE=1 SV=2
24	1	UniProt_human	Q13200	2012	100136	72	72	26	26	2.28	26S proteasome non-ATPase regulatory subunit 2 OS=Homo sapiens GN=PSMD2 PE=1 SV=3
25	1	UniProt_human	Q9Y4R8	1965	91689	86	86	26	26	2.49	Telomere length regulation protein TEL2 homolog OS=Homo sapiens GN=TELO2 PE=1 SV=2
26	1	UniProt_human	P16615	1958	114683	74	74	27	27	1.72	Sarcoplasmic/endoplasmic reticulum calcium ATPase 2 OS=Homo sapiens GN=ATP2A2 PE=1 SV=1
27	1	UniProt_human	P14735	1953	117893	127	127	40	40	3.55	Insulin-degrading enzyme OS=Homo sapiens GN=IDE PE=1 SV=4
3	3	UniProt_human	P02533	1950	51529	61	61	21	21	6.8	Keratin, type I cytoskeletal 14 OS=Homo sapiens GN=KRT14 PE=1 SV=4
28	1	UniProt_human	Q3SY69	1906	101681	91	91	36	36	3.69	Mitochondrial 10-formyltetrahydrofolate dehydrogenase OS=Homo sapiens GN=ALDH1L2 PE=1 SV=2
29	1	UniProt_human	Q14974	1895	97108	72	72	20	20	1.73	Importin subunit beta-1 OS=Homo sapiens GN=KPNB1 PE=1 SV=2
30	1	UniProt_human	Q9Y5V3	1867	86107	63	63	20	20	1.81	Melanoma-associated antigen D1 OS=Homo sapiens GN=MAGED1 PE=1 SV=3
9	2	UniProt_human	A0A0A0MT26	1816	133231	52	52	14	14	0.67	Sodium/potassium-transporting ATPase subunit alpha-3 OS=Homo sapiens GN=ATP1A3 PE=1 SV=1
31	1	UniProt_human	H7BXI1	1784	97949	67	67	26	26	2.23	Extended synaptotagmin-2 (Fragment) OS=Homo sapiens GN=ESYT2 PE=1 SV=1
32	1	UniProt_human	P34932	1777	94271	72	72	23	23	2.08	Heat shock 70 kDa protein 4 OS=Homo sapiens GN=HSPA4 PE=1 SV=4
3	4	UniProt_human	P08779	1716	51236	58	58	21	21	6.86	Keratin, type I cytoskeletal 16 OS=Homo sapiens GN=KRT16 PE=1 SV=4
33	1	UniProt_human	J3KPF3	1694	68059	62	62	24	24	3.46	4F2 cell-surface antigen heavy chain OS=Homo sapiens GN=SLC3A2 PE=1 SV=1
34	1	UniProt_human	Q9Y678	1586	97655	54	54	19	19	1.39	Coatomer subunit gamma-1 OS=Homo sapiens GN=COPG1 PE=1 SV=1
35	1	UniProt_human	C9JZR2	1578	104784	65	65	28	28	2.24	Catenin delta-1 OS=Homo sapiens GN=CTNND1 PE=1 SV=2
36	1	UniProt_human	O75330	1562	84049	66	66	26	26	2.91	Hyaluronan mediated motility receptor OS=Homo sapiens GN=HMMR PE=1 SV=2
13	2	UniProt_human	P12814	1524	102993	78	78	32	32	2.74	Alpha-actinin-1 OS=Homo sapiens GN=ACTN1 PE=1 SV=2
37	1	UniProt_human	Q12906-2	1516	75985	60	60	20	20	2.23	Isoform 2 of Interleukin enhancer-binding factor 3 OS=Homo sapiens GN=ILF3
37	2	UniProt_human	Q12906-4	1483	75461	60	60	20	20	2.25	Isoform 4 of Interleukin enhancer-binding factor 3 OS=Homo sapiens GN=ILF3
38	1	UniProt_human	Q7KZF4	1375	101934	59	59	25	25	1.96	Staphylococcal nuclease domain-containing protein 1 OS=Homo sapiens GN=SND1 PE=1 SV=1
39	1	UniProt_human	P22314	1320	117774	36	36	17	17	0.91	Ubiquitin-like modifier-activating enzyme 1 OS=Homo sapiens GN=UBA1 PE=1 SV=3
40	1	UniProt_human	Q92499	1316	82380	49	49	18	18	1.66	ATP-dependent RNA helicase DDX1 OS=Homo sapiens GN=DDX1 PE=1 SV=2
41	1	UniProt_human	P23246	1315	76102	50	50	18	18	1.73	Splicing factor, proline- and glutamine-rich OS=Homo sapiens GN=SFPQ PE=1 SV=2
42	1	UniProt_human	P25205-2	1275	95848	50	50	24	24	2.03	Isoform 2 of DNA replication licensing factor MCM3 OS=Homo sapiens GN=MCM3
43	1	UniProt_human	I3L2C7	1247	118745	48	48	21	21	1.12	Gem-associated protein 4 OS=Homo sapiens GN=GEMIN4 PE=1 SV=1
44	1	UniProt_human	P55060	1225	110346	63	63	26	26	1.83	Exportin-2 OS=Homo sapiens GN=CSE1L PE=1 SV=3
45	1	UniProt_human	Q6P3X3	1222	96571	47	47	20	20	1.52	Tetratricopeptide repeat protein 27 OS=Homo sapiens GN=TTC27 PE=1 SV=1
46	1	UniProt_human	O00459	1213	81495	66	66	27	27	3.08	Phosphatidylinositol 3-kinase regulatory subunit beta OS=Homo sapiens GN=PIK3R2 PE=1 SV=2
34	2	UniProt_human	Q9UBF2	1205	97560	45	45	20	20	1.39	Coatomer subunit gamma-2 OS=Homo sapiens GN=COPG2 PE=1 SV=1
4	3	UniProt_human	P14625	1199	92411	42	42	21	21	1.75	Endoplasmin OS=Homo sapiens GN=HSP90B1 PE=1 SV=1
47	1	UniProt_human	P57740	1184	106307	47	47	23	23	1.61	Nuclear pore complex protein Nup107 OS=Homo sapiens GN=NUP107 PE=1 SV=1
48	1	UniProt_human	C9J5X1	1183	154691	51	51	15	15	0.55	Tyrosine-protein kinase receptor OS=Homo sapiens GN=IGF1R PE=1 SV=1
49	1	UniProt_human	P33991	1181	96498	51	51	22	22	1.63	DNA replication licensing factor MCM4 OS=Homo sapiens GN=MCM4 PE=1 SV=5
50	1	UniProt_human	Q86Y56	1176	93462	42	42	17	17	1.16	Dynein assembly factor 5, axonemal OS=Homo sapiens GN=DNAAF5 PE=1 SV=4
51	1	UniProt_human	Q8TD16	1157	93476	54	54	34	34	3.9	Protein bicaudal D homolog 2 OS=Homo sapiens GN=BICD2 PE=1 SV=1
32	2	UniProt_human	Q92598	1156	96804	49	49	20	20	1.63	Heat shock protein 105 kDa OS=Homo sapiens GN=HSPH1 PE=1 SV=1
52	1	UniProt_human	Q5JP53	1142	47736	51	51	13	13	2.16	Tubulin beta chain OS=Homo sapiens GN=TUBB PE=1 SV=1
53	1	UniProt_human	Q93034	1127	90897	51	51	21	21	1.79	Cullin-5 OS=Homo sapiens GN=CUL5 PE=1 SV=4
54	1	UniProt_human	Q9NVE7	1100	85937	50	50	24	24	2.27	Pantothenate kinase 4 OS=Homo sapiens GN=PANK4 PE=1 SV=1
55	1	UniProt_human	Q14697	1098	106807	58	58	26	26	1.93	Neutral alpha-glucosidase AB OS=Homo sapiens GN=GANAB PE=1 SV=3
48	2	UniProt_human	P06213	1082	156232	50	50	18	18	0.68	Insulin receptor OS=Homo sapiens GN=INSR PE=1 SV=4
56	1	UniProt_human	Q8N6R0	1063	78718	49	49	18	18	1.64	Methyltransferase-like protein 13 OS=Homo sapiens GN=METTL13 PE=1 SV=1
52	2	UniProt_human	P68371	1060	49799	51	51	13	13	2.01	Tubulin beta-4B chain OS=Homo sapiens GN=TUBB4B PE=1 SV=1
5	3	UniProt_human	P04259	1034	60030	54	54	19	19	3.72	Keratin, type II cytoskeletal 6B OS=Homo sapiens GN=KRT6B PE=1 SV=5
5	4	UniProt_human	P02538	1031	60008	49	49	18	18	3.4	Keratin, type II cytoskeletal 6A OS=Homo sapiens GN=KRT6A PE=1 SV=3
57	1	UniProt_human	Q9BQE3	1027	49863	35	35	12	12	1.77	Tubulin alpha-1C chain OS=Homo sapiens GN=TUBA1C PE=1 SV=1
58	1	UniProt_human	P35606	1026	102422	60	60	23	23	1.7	Coatomer subunit beta' OS=Homo sapiens GN=COPB2 PE=1 SV=2
59	1	UniProt_human	Q99460	1018	105769	36	36	14	14	0.83	26S proteasome non-ATPase regulatory subunit 1 OS=Homo sapiens GN=PSMD1 PE=1 SV=2
60	1	UniProt_human	Q9ULX6	1004	71604	47	47	12	12	1.16	A-kinase anchor protein 8-like OS=Homo sapiens GN=AKAP8L PE=1 SV=3
61	1	UniProt_human	P19338	989	76568	35	35	18	18	1.71	Nucleolin OS=Homo sapiens GN=NCL PE=1 SV=3
62	1	UniProt_human	Q8IXB1	987	91021	41	41	15	15	1.21	DnaJ homolog subfamily C member 10 OS=Homo sapiens GN=DNAJC10 PE=1 SV=2
63	1	UniProt_human	P13010	963	82652	53	53	21	21	1.94	X-ray repair cross-complementing protein 5 OS=Homo sapiens GN=XRCC5 PE=1 SV=3
64	1	UniProt_human	Q15386	955	123844	45	45	21	21	1.06	Ubiquitin-protein ligase E3C OS=Homo sapiens GN=UBE3C PE=1 SV=3
65	1	UniProt_human	P42224	948	87280	43	43	17	17	1.4	Signal transducer and activator of transcription 1-alpha/beta OS=Homo sapiens GN=STAT1 PE=1 SV=2
52	3	UniProt_human	Q13885	934	49875	43	43	11	11	1.54	Tubulin beta-2A chain OS=Homo sapiens GN=TUBB2A PE=1 SV=1
66	1	UniProt_human	P47897	927	87743	51	51	24	24	2.2	Glutamine--tRNA ligase OS=Homo sapiens GN=QARS PE=1 SV=1
32	3	UniProt_human	O95757	925	94453	35	35	16	16	1.05	Heat shock 70 kDa protein 4L OS=Homo sapiens GN=HSPA4L PE=1 SV=3
67	1	UniProt_human	Q96H55	906	109066	30	30	13	13	0.66	Unconventional myosin-XIX OS=Homo sapiens GN=MYO19 PE=1 SV=2
5	5	UniProt_human	P13647	905	62340	52	52	22	22	4.1	Keratin, type II cytoskeletal 5 OS=Homo sapiens GN=KRT5 PE=1 SV=3
68	1	UniProt_human	P19367	899	102420	38	38	20	20	1.39	Hexokinase-1 OS=Homo sapiens GN=HK1 PE=1 SV=3
69	1	UniProt_human	Q9Y2A7	886	128707	46	46	22	22	1.07	Nck-associated protein 1 OS=Homo sapiens GN=NCKAP1 PE=1 SV=1
70	1	UniProt_human	Q8NB90	885	97843	39	39	20	20	1.38	Spermatogenesis-associated protein 5 OS=Homo sapiens GN=SPATA5 PE=1 SV=3
71	1	UniProt_human	Q8WUM4	871	95963	31	31	18	18	1.22	Programmed cell death 6-interacting protein OS=Homo sapiens GN=PDCD6IP PE=1 SV=1
72	1	UniProt_human	Q9BSJ2	860	102469	42	42	21	21	1.39	Gamma-tubulin complex component 2 OS=Homo sapiens GN=TUBGCP2 PE=1 SV=2
52	4	UniProt_human	A0A0B4J269	853	88324	38	38	8	8	0.47	Uncharacterized protein OS=Homo sapiens PE=1 SV=1
73	1	UniProt_human	Q99459	844	92194	28	28	15	15	0.99	Cell division cycle 5-like protein OS=Homo sapiens GN=CDC5L PE=1 SV=2
74	1	UniProt_human	Q9H2U1	826	114688	35	35	17	17	0.88	ATP-dependent RNA helicase DHX36 OS=Homo sapiens GN=DHX36 PE=1 SV=2
75	1	UniProt_human	Q96T76	824	113217	38	38	22	22	1.28	MMS19 nucleotide excision repair protein homolog OS=Homo sapiens GN=MMS19 PE=1 SV=2
76	1	UniProt_human	O43143	816	90875	41	41	17	17	1.21	Pre-mRNA-splicing factor ATP-dependent RNA helicase DHX15 OS=Homo sapiens GN=DHX15 PE=1 SV=2
77	1	UniProt_human	Q9UHI6	775	92182	35	35	16	16	1.19	Probable ATP-dependent RNA helicase DDX20 OS=Homo sapiens GN=DDX20 PE=1 SV=2
78	1	UniProt_human	Q9NSE4	770	113719	43	43	19	19	1.11	Isoleucine--tRNA ligase, mitochondrial OS=Homo sapiens GN=IARS2 PE=1 SV=2
79	1	UniProt_human	A0A0C4DGB6	762	69181	18	18	3	3	0.2	Serum albumin OS=Homo sapiens GN=ALB PE=1 SV=1
80	1	UniProt_human	P06737	761	97087	38	38	23	23	1.86	Glycogen phosphorylase, liver form OS=Homo sapiens GN=PYGL PE=1 SV=4
81	1	UniProt_human	O60313	756	111561	40	40	22	22	1.31	Dynamin-like 120 kDa protein, mitochondrial OS=Homo sapiens GN=OPA1 PE=1 SV=3
82	1	UniProt_human	Q2NL82	751	91752	30	30	12	12	0.74	Pre-rRNA-processing protein TSR1 homolog OS=Homo sapiens GN=TSR1 PE=1 SV=1
68	2	UniProt_human	E9PB90	743	98909	31	31	14	14	0.82	Hexokinase-2 OS=Homo sapiens GN=HK2 PE=1 SV=1
83	1	UniProt_human	Q9BZQ6	743	104598	28	28	14	14	0.77	ER degradation-enhancing alpha-mannosidase-like protein 3 OS=Homo sapiens GN=EDEM3 PE=1 SV=2
84	1	UniProt_human	P35221	742	100009	30	30	19	19	1.24	Catenin alpha-1 OS=Homo sapiens GN=CTNNA1 PE=1 SV=1
85	1	UniProt_human	Q9UIA9	731	123828	32	32	20	20	1.06	Exportin-7 OS=Homo sapiens GN=XPO7 PE=1 SV=3
86	1	UniProt_human	P50416	723	88311	27	27	14	14	0.96	Carnitine O-palmitoyltransferase 1, liver isoform OS=Homo sapiens GN=CPT1A PE=1 SV=2
87	1	UniProt_human	Q13724	718	91861	33	33	14	14	0.91	Mannosyl-oligosaccharide glucosidase OS=Homo sapiens GN=MOGS PE=1 SV=5
88	1	UniProt_human	Q5JTZ9	704	107273	27	27	15	15	0.81	Alanine--tRNA ligase, mitochondrial OS=Homo sapiens GN=AARS2 PE=1 SV=1
89	1	UniProt_human	P33992	693	82233	31	31	14	14	1.06	DNA replication licensing factor MCM5 OS=Homo sapiens GN=MCM5 PE=1 SV=5
90	1	UniProt_human	Q5W0B1	681	81066	28	28	12	12	0.87	RING finger protein 219 OS=Homo sapiens GN=RNF219 PE=1 SV=1
91	1	UniProt_human	P15311	670	69370	31	31	15	15	1.5	Ezrin OS=Homo sapiens GN=EZR PE=1 SV=4
92	1	UniProt_human	B4DGU4	669	84712	23	23	12	12	0.82	Catenin beta-1 OS=Homo sapiens GN=CTNNB1 PE=1 SV=1
93	1	UniProt_human	Q99959	658	97355	26	26	14	14	0.84	Plakophilin-2 OS=Homo sapiens GN=PKP2 PE=1 SV=2
94	1	UniProt_human	E7ESA6	656	124003	42	42	19	19	0.92	Focal adhesion kinase 1 OS=Homo sapiens GN=PTK2 PE=1 SV=1
95	1	UniProt_human	Q9UI26	655	112463	28	28	17	17	0.9	Importin-11 OS=Homo sapiens GN=IPO11 PE=1 SV=1
96	1	UniProt_human	Q92973	653	102289	29	29	11	11	0.58	Transportin-1 OS=Homo sapiens GN=TNPO1 PE=1 SV=2
97	1	UniProt_human	Q96A65	624	110429	25	25	17	17	0.92	Exocyst complex component 4 OS=Homo sapiens GN=EXOC4 PE=1 SV=1
98	1	UniProt_human	Q08J23	622	86416	28	28	16	16	1.19	tRNA (cytosine(34)-C(5))-methyltransferase OS=Homo sapiens GN=NSUN2 PE=1 SV=2
99	1	UniProt_human	O43823	620	76061	20	20	9	9	0.75	A-kinase anchor protein 8 OS=Homo sapiens GN=AKAP8 PE=1 SV=1
100	1	UniProt_human	Q13616	618	89622	32	32	18	18	1.35	Cullin-1 OS=Homo sapiens GN=CUL1 PE=1 SV=2
101	1	UniProt_human	A0A0B4J1V9	611	102650	42	42	21	21	1.38	Helicase, lymphoid-specific, isoform CRA_b OS=Homo sapiens GN=HELLS PE=1 SV=1
102	1	UniProt_human	F5H365	610	82916	20	20	8	8	0.51	Protein transport protein Sec23A OS=Homo sapiens GN=SEC23A PE=1 SV=1
103	1	UniProt_human	Q9BW92	600	80985	19	19	14	14	1.08	Threonine--tRNA ligase, mitochondrial OS=Homo sapiens GN=TARS2 PE=1 SV=1
104	1	UniProt_human	P50570	589	98003	25	25	16	16	1	Dynamin-2 OS=Homo sapiens GN=DNM2 PE=1 SV=2
105	1	UniProt_human	O00178	588	72408	21	21	9	9	0.8	GTP-binding protein 1 OS=Homo sapiens GN=GTPBP1 PE=1 SV=3
106	1	UniProt_human	B0QYK0	577	64889	24	24	6	6	0.48	RNA-binding protein EWS OS=Homo sapiens GN=EWSR1 PE=1 SV=1
107	1	UniProt_human	Q96HW7	573	108102	19	19	12	12	0.6	Integrator complex subunit 4 OS=Homo sapiens GN=INTS4 PE=1 SV=2
108	1	UniProt_human	Q6P996	572	86652	29	29	19	19	1.54	Pyridoxal-dependent decarboxylase domain-containing protein 1 OS=Homo sapiens GN=PDXDC1 PE=1 SV=2
109	1	UniProt_human	Q01433	572	100624	33	33	16	16	0.96	AMP deaminase 2 OS=Homo sapiens GN=AMPD2 PE=1 SV=2
46	2	UniProt_human	P27986	568	83547	37	37	17	17	1.49	Phosphatidylinositol 3-kinase regulatory subunit alpha OS=Homo sapiens GN=PIK3R1 PE=1 SV=2
110	1	UniProt_human	F8W726	562	113559	19	19	9	9	0.45	Ubiquitin-associated protein 2-like OS=Homo sapiens GN=UBAP2L PE=1 SV=2
111	1	UniProt_human	E9PLK3	557	102922	29	29	17	17	1.02	Puromycin-sensitive aminopeptidase OS=Homo sapiens GN=NPEPPS PE=1 SV=1
112	1	UniProt_human	O94874	552	89540	29	29	18	18	1.35	E3 UFM1-protein ligase 1 OS=Homo sapiens GN=UFL1 PE=1 SV=2
104	2	UniProt_human	P50570-4	552	97905	25	25	16	16	1	Isoform 4 of Dynamin-2 OS=Homo sapiens GN=DNM2
113	1	UniProt_human	Q9Y2X7	549	84289	21	21	12	12	0.92	ARF GTPase-activating protein GIT1 OS=Homo sapiens GN=GIT1 PE=1 SV=2
114	1	UniProt_human	Q9Y4C2	547	102061	30	30	13	13	0.72	TRPM8 channel-associated factor 1 OS=Homo sapiens GN=TCAF1 PE=1 SV=3
115	1	UniProt_human	O94906	539	106858	29	29	16	16	0.89	Pre-mRNA-processing factor 6 OS=Homo sapiens GN=PRPF6 PE=1 SV=1
116	1	UniProt_human	Q9UJC3	538	84595	17	17	8	8	0.49	Protein Hook homolog 1 OS=Homo sapiens GN=HOOK1 PE=1 SV=2
117	1	UniProt_human	Q9Y4W6	535	88528	21	21	12	12	0.78	AFG3-like protein 2 OS=Homo sapiens GN=AFG3L2 PE=1 SV=2
118	1	UniProt_human	Q9Y5L0	528	104136	27	27	15	15	0.92	Transportin-3 OS=Homo sapiens GN=TNPO3 PE=1 SV=3
119	1	UniProt_human	A0A087WVQ6	526	191936	27	27	17	17	0.46	Clathrin heavy chain OS=Homo sapiens GN=CLTC PE=1 SV=1
120	1	UniProt_human	A0A087X1H5	523	87965	15	15	9	9	0.54	Arf-GAP with coiled-coil, ANK repeat and PH domain-containing protein 2 OS=Homo sapiens GN=ACAP2 PE=1 SV=1
121	1	UniProt_human	P51530	516	120337	21	21	12	12	0.53	DNA replication ATP-dependent helicase/nuclease DNA2 OS=Homo sapiens GN=DNA2 PE=1 SV=3
122	1	UniProt_human	A0A087WTP3	513	72982	25	25	13	13	1.13	Far upstream element-binding protein 2 OS=Homo sapiens GN=KHSRP PE=1 SV=1
5	6	UniProt_human	P19013	511	57250	19	19	4	4	0.56	Keratin, type II cytoskeletal 4 OS=Homo sapiens GN=KRT4 PE=1 SV=4
4	4	UniProt_human	Q58FG1	510	47682	22	22	4	4	0.43	Putative heat shock protein HSP 90-alpha A4 OS=Homo sapiens GN=HSP90AA4P PE=5 SV=1
123	1	UniProt_human	Q9H0D6	509	108513	22	22	16	16	0.87	5'-3' exoribonuclease 2 OS=Homo sapiens GN=XRN2 PE=1 SV=1
124	1	UniProt_human	Q9UID3	508	85988	19	19	13	13	0.9	Vacuolar protein sorting-associated protein 51 homolog OS=Homo sapiens GN=VPS51 PE=1 SV=2
4	5	UniProt_human	Q58FF6	507	58228	14	14	4	4	0.34	Putative heat shock protein HSP 90-beta 4 OS=Homo sapiens GN=HSP90AB4P PE=5 SV=1
125	1	UniProt_human	P22102	506	107699	25	25	16	16	0.96	Trifunctional purine biosynthetic protein adenosine-3 OS=Homo sapiens GN=GART PE=1 SV=1
126	1	UniProt_human	A0A087WXK8	505	67622	21	21	11	11	0.99	Chromosome 20 open reading frame 129 OS=Homo sapiens GN=FAM83D PE=1 SV=1
127	1	UniProt_human	A0A0B4J2G4	499	86184	22	22	14	14	0.99	Leucine-rich repeat-containing protein 41 OS=Homo sapiens GN=LRRC41 PE=1 SV=1
128	1	UniProt_human	Q01813	495	85542	15	15	9	9	0.56	ATP-dependent 6-phosphofructokinase, platelet type OS=Homo sapiens GN=PFKP PE=1 SV=2
129	1	UniProt_human	J3QRN6	492	111219	32	32	16	16	0.84	Unconventional myosin-Id OS=Homo sapiens GN=MYO1D PE=1 SV=1
130	1	UniProt_human	P33981	488	97011	22	22	13	13	0.77	Dual specificity protein kinase TTK OS=Homo sapiens GN=TTK PE=1 SV=2
131	1	UniProt_human	Q9Y4W2	487	83013	17	17	9	9	0.58	Ribosomal biogenesis protein LAS1L OS=Homo sapiens GN=LAS1L PE=1 SV=2
132	1	UniProt_human	Q9Y6W5	482	54250	17	17	7	7	0.87	Wiskott-Aldrich syndrome protein family member 2 OS=Homo sapiens GN=WASF2 PE=1 SV=3
133	1	UniProt_human	Q96CW5	481	103506	16	16	10	10	0.51	Gamma-tubulin complex component 3 OS=Homo sapiens GN=TUBGCP3 PE=1 SV=2
134	1	UniProt_human	A0A087X295	480	124921	31	31	14	14	0.61	WD repeat-containing protein 6 OS=Homo sapiens GN=WDR6 PE=1 SV=1
135	1	UniProt_human	Q14566	478	92831	22	22	14	14	0.9	DNA replication licensing factor MCM6 OS=Homo sapiens GN=MCM6 PE=1 SV=1
136	1	UniProt_human	Q96QK1	478	91649	19	19	12	12	0.74	Vacuolar protein sorting-associated protein 35 OS=Homo sapiens GN=VPS35 PE=1 SV=2
137	1	UniProt_human	Q9Y450	473	75426	17	17	11	11	0.86	HBS1-like protein OS=Homo sapiens GN=HBS1L PE=1 SV=1
138	1	UniProt_human	M0R165	470	83424	14	14	10	10	0.66	Epidermal growth factor receptor substrate 15-like 1 OS=Homo sapiens GN=EPS15L1 PE=1 SV=1
139	1	UniProt_human	Q4VCS5	468	118013	20	20	11	11	0.54	Angiomotin OS=Homo sapiens GN=AMOT PE=1 SV=1
140	1	UniProt_human	Q9NVH2	463	106766	28	28	18	18	1.05	Integrator complex subunit 7 OS=Homo sapiens GN=INTS7 PE=1 SV=1
141	1	UniProt_human	O15066	461	85073	20	20	12	12	0.82	Kinesin-like protein KIF3B OS=Homo sapiens GN=KIF3B PE=1 SV=1
143	1	UniProt_human	P05141	459	32831	30	30	10	10	2.6	ADP/ATP translocase 2 OS=Homo sapiens GN=SLC25A5 PE=1 SV=7
142	1	UniProt_human	Q5C9Z4	459	96198	18	18	9	9	0.49	Nucleolar MIF4G domain-containing protein 1 OS=Homo sapiens GN=NOM1 PE=1 SV=1
144	1	UniProt_human	Q01780	455	100768	26	26	17	17	1.05	Exosome component 10 OS=Homo sapiens GN=EXOSC10 PE=1 SV=2
145	1	UniProt_human	Q96JG6	454	111104	16	16	10	10	0.47	Syndetin OS=Homo sapiens GN=VPS50 PE=1 SV=3
146	1	UniProt_human	Q16531	444	126887	26	26	15	15	0.65	DNA damage-binding protein 1 OS=Homo sapiens GN=DDB1 PE=1 SV=1
147	1	UniProt_human	P27824	439	67526	19	19	10	10	0.87	Calnexin OS=Homo sapiens GN=CANX PE=1 SV=2
149	1	UniProt_human	X6R3U4	431	84805	15	15	9	9	0.57	Pleckstrin homology domain-containing family H member 3 OS=Homo sapiens GN=PLEKHH3 PE=1 SV=1
148	1	UniProt_human	Q9C0C7	431	142420	12	12	8	8	0.27	Activating molecule in BECN1-regulated autophagy protein 1 OS=Homo sapiens GN=AMBRA1 PE=1 SV=2
150	1	UniProt_human	Q86WJ1	428	100921	22	22	16	16	0.96	Chromodomain-helicase-DNA-binding protein 1-like OS=Homo sapiens GN=CHD1L PE=1 SV=2
151	1	UniProt_human	A0A087X253	424	101268	17	17	11	11	0.59	AP-2 complex subunit beta OS=Homo sapiens GN=AP2B1 PE=1 SV=1
152	1	UniProt_human	H0Y8C6	421	123779	20	20	9	9	0.41	Importin-5 (Fragment) OS=Homo sapiens GN=IPO5 PE=1 SV=1
15	2	UniProt_human	A0A087WVM4	420	99249	20	20	12	12	0.67	Monofunctional C1-tetrahydrofolate synthase, mitochondrial OS=Homo sapiens GN=MTHFD1L PE=1 SV=1
153	1	UniProt_human	P09874	419	113012	14	14	11	11	0.51	Poly [ADP-ribose] polymerase 1 OS=Homo sapiens GN=PARP1 PE=1 SV=4
154	1	UniProt_human	Q9UHD2	418	83589	14	14	10	10	0.66	Serine/threonine-protein kinase TBK1 OS=Homo sapiens GN=TBK1 PE=1 SV=1
143	2	UniProt_human	P12236	416	32845	27	27	8	8	1.79	ADP/ATP translocase 3 OS=Homo sapiens GN=SLC25A6 PE=1 SV=4
155	1	UniProt_human	O75534	415	88829	18	18	11	11	0.69	Cold shock domain-containing protein E1 OS=Homo sapiens GN=CSDE1 PE=1 SV=2
156	1	UniProt_human	O94829	413	108126	14	14	7	7	0.32	Importin-13 OS=Homo sapiens GN=IPO13 PE=1 SV=3
157	1	UniProt_human	Q9UJ14	405	70423	15	15	8	8	0.62	Gamma-glutamyltransferase 7 OS=Homo sapiens GN=GGT7 PE=1 SV=2
158	1	UniProt_human	Q12788	403	88978	10	10	6	6	0.33	Transducin beta-like protein 3 OS=Homo sapiens GN=TBL3 PE=1 SV=2
159	1	UniProt_human	O43264	402	88773	18	18	11	11	0.69	Centromere/kinetochore protein zw10 homolog OS=Homo sapiens GN=ZW10 PE=1 SV=3
160	1	UniProt_human	Q06210	402	78756	14	14	8	8	0.54	Glutamine--fructose-6-phosphate aminotransferase [isomerizing] 1 OS=Homo sapiens GN=GFPT1 PE=1 SV=3
102	2	UniProt_human	Q15437	402	86424	15	15	8	8	0.48	Protein transport protein Sec23B OS=Homo sapiens GN=SEC23B PE=1 SV=2
161	1	UniProt_human	Q92615	400	80503	11	11	6	6	0.45	La-related protein 4B OS=Homo sapiens GN=LARP4B PE=1 SV=3
162	1	UniProt_human	Q96FC9-2	391	101620	15	15	11	11	0.58	Isoform 2 of Probable ATP-dependent DNA helicase DDX11 OS=Homo sapiens GN=DDX11
162	2	UniProt_human	A8MPP1	390	101746	14	14	10	10	0.52	Putative ATP-dependent RNA helicase DDX11-like protein 8 OS=Homo sapiens GN=DDX11L8 PE=1 SV=1
163	1	UniProt_human	Q9NR30	386	87290	20	20	16	16	1.29	Nucleolar RNA helicase 2 OS=Homo sapiens GN=DDX21 PE=1 SV=5
164	1	UniProt_human	A0A0U1RQX8	383	96825	16	16	7	7	0.36	E3 ubiquitin-protein ligase CBL OS=Homo sapiens GN=CBL PE=1 SV=1
165	1	UniProt_human	B7Z4B8	382	86069	19	19	9	9	0.56	Heterogeneous nuclear ribonucleoprotein U-like protein 1 OS=Homo sapiens GN=HNRNPUL1 PE=1 SV=1
3	5	UniProt_human	Q7Z3Y7	379	50536	21	21	5	5	0.95	Keratin, type I cytoskeletal 28 OS=Homo sapiens GN=KRT28 PE=1 SV=2
166	1	UniProt_human	Q9Y5Q9	377	101208	18	18	11	11	0.59	General transcription factor 3C polypeptide 3 OS=Homo sapiens GN=GTF3C3 PE=1 SV=1
151	2	UniProt_human	Q10567	376	104570	15	15	9	9	0.44	AP-1 complex subunit beta-1 OS=Homo sapiens GN=AP1B1 PE=1 SV=2
167	1	UniProt_human	Q9UKM7	372	79530	16	16	10	10	0.71	Endoplasmic reticulum mannosyl-oligosaccharide 1,2-alpha-mannosidase OS=Homo sapiens GN=MAN1B1 PE=1 SV=2
168	1	UniProt_human	Q99523	372	92009	16	16	7	7	0.45	Sortilin OS=Homo sapiens GN=SORT1 PE=1 SV=3
169	1	UniProt_human	Q15758	370	56562	16	16	7	7	0.69	Neutral amino acid transporter B(0) OS=Homo sapiens GN=SLC1A5 PE=1 SV=2
170	1	UniProt_human	Q99613	361	105278	17	17	12	12	0.62	Eukaryotic translation initiation factor 3 subunit C OS=Homo sapiens GN=EIF3C PE=1 SV=1
171	1	UniProt_human	E9PKE3	360	68763	11	11	8	8	0.64	Heat shock cognate 71 kDa protein OS=Homo sapiens GN=HSPA8 PE=1 SV=1
3	6	UniProt_human	Q04695	359	48076	20	20	10	10	1.41	Keratin, type I cytoskeletal 17 OS=Homo sapiens GN=KRT17 PE=1 SV=2
173	1	UniProt_human	Q9NV70-2	354	100219	16	16	10	10	0.53	Isoform 2 of Exocyst complex component 1 OS=Homo sapiens GN=EXOC1
172	1	UniProt_human	P78527	354	468788	21	21	15	15	0.15	DNA-dependent protein kinase catalytic subunit OS=Homo sapiens GN=PRKDC PE=1 SV=3
174	1	UniProt_human	Q8N1B4	351	82170	19	19	13	13	0.96	Vacuolar protein sorting-associated protein 52 homolog OS=Homo sapiens GN=VPS52 PE=1 SV=1
175	1	UniProt_human	O60447-2	348	94074	17	17	12	12	0.72	Isoform 2 of Ecotropic viral integration site 5 protein homolog OS=Homo sapiens GN=EVI5
176	1	UniProt_human	H0Y9V7	348	98986	14	14	8	8	0.47	Calcium-transporting ATPase type 2C member 1 (Fragment) OS=Homo sapiens GN=ATP2C1 PE=1 SV=1
177	1	UniProt_human	Q00839	347	90528	7	7	3	3	0.15	Heterogeneous nuclear ribonucleoprotein U OS=Homo sapiens GN=HNRNPU PE=1 SV=6
178	1	UniProt_human	E9PHA2	346	81522	11	11	9	9	0.6	Condensin complex subunit 2 OS=Homo sapiens GN=NCAPH PE=1 SV=1
179	1	UniProt_human	A0A087X211	338	102218	21	21	13	13	0.72	Protein CIP2A OS=Homo sapiens GN=KIAA1524 PE=1 SV=1
180	1	UniProt_human	Q96S59	336	77798	12	12	7	7	0.55	Ran-binding protein 9 OS=Homo sapiens GN=RANBP9 PE=1 SV=1
181	1	UniProt_human	Q6PJG6	334	88063	9	9	6	6	0.34	BRCA1-associated ATM activator 1 OS=Homo sapiens GN=BRAT1 PE=1 SV=2
171	2	UniProt_human	P11021	333	72288	13	13	8	8	0.6	78 kDa glucose-regulated protein OS=Homo sapiens GN=HSPA5 PE=1 SV=2
182	1	UniProt_human	B1ALK7	330	79782	15	15	11	11	0.89	Rho guanine nucleotide exchange factor 7 OS=Homo sapiens GN=ARHGEF7 PE=1 SV=1
183	1	UniProt_human	Q9P2I0	329	88431	17	17	12	12	0.78	Cleavage and polyadenylation specificity factor subunit 2 OS=Homo sapiens GN=CPSF2 PE=1 SV=2
184	1	UniProt_human	Q92845	329	91146	7	7	5	5	0.26	Kinesin-associated protein 3 OS=Homo sapiens GN=KIFAP3 PE=1 SV=2
3	7	UniProt_human	P19012	327	49181	18	18	8	8	0.99	Keratin, type I cytoskeletal 15 OS=Homo sapiens GN=KRT15 PE=1 SV=3
185	1	UniProt_human	P55884	327	92424	15	15	9	9	0.51	Eukaryotic translation initiation factor 3 subunit B OS=Homo sapiens GN=EIF3B PE=1 SV=3
3	8	UniProt_human	P08727	326	44079	16	16	8	8	1.37	Keratin, type I cytoskeletal 19 OS=Homo sapiens GN=KRT19 PE=1 SV=4
186	1	UniProt_human	G5E9W2	325	85094	16	16	10	10	0.65	Chondroitin sulfate glucuronyltransferase OS=Homo sapiens GN=CHPF2 PE=1 SV=1
187	1	UniProt_human	Q9UBB9	323	96758	20	20	14	14	0.85	Tuftelin-interacting protein 11 OS=Homo sapiens GN=TFIP11 PE=1 SV=1
188	1	UniProt_human	Q5VIR6-4	320	94345	12	12	6	6	0.31	Isoform 4 of Vacuolar protein sorting-associated protein 53 homolog OS=Homo sapiens GN=VPS53
189	1	UniProt_human	Q09161	318	91781	13	13	10	10	0.59	Nuclear cap-binding protein subunit 1 OS=Homo sapiens GN=NCBP1 PE=1 SV=1
190	1	UniProt_human	O75843	317	87062	12	12	8	8	0.48	AP-1 complex subunit gamma-like 2 OS=Homo sapiens GN=AP1G2 PE=1 SV=1
191	1	UniProt_human	Q00325	316	40069	12	12	7	7	1.32	Phosphate carrier protein, mitochondrial OS=Homo sapiens GN=SLC25A3 PE=1 SV=2
192	1	UniProt_human	Q8IYI6	314	81747	10	10	7	7	0.44	Exocyst complex component 8 OS=Homo sapiens GN=EXOC8 PE=1 SV=2
5	7	UniProt_human	P12035	313	64378	16	16	7	7	0.69	Keratin, type II cytoskeletal 3 OS=Homo sapiens GN=KRT3 PE=1 SV=3
193	1	UniProt_human	Q6NSI4	313	97493	13	13	9	9	0.48	Uncharacterized protein CXorf57 OS=Homo sapiens GN=CXorf57 PE=1 SV=2
5	8	UniProt_human	Q7Z794	312	61864	19	19	5	5	0.51	Keratin, type II cytoskeletal 1b OS=Homo sapiens GN=KRT77 PE=2 SV=3
194	1	UniProt_human	Q9UBV2	311	88698	12	12	7	7	0.54	Protein sel-1 homolog 1 OS=Homo sapiens GN=SEL1L PE=1 SV=3
196	1	UniProt_human	Q13480-2	310	79955	14	14	7	7	0.45	Isoform 2 of GRB2-associated-binding protein 1 OS=Homo sapiens GN=GAB1
195	1	UniProt_human	P42338	310	122683	11	11	8	8	0.32	Phosphatidylinositol 4,5-bisphosphate 3-kinase catalytic subunit beta isoform OS=Homo sapiens GN=PIK3CB PE=1 SV=1
198	1	UniProt_human	O15226	309	77624	12	12	9	9	0.64	NF-kappa-B-repressing factor OS=Homo sapiens GN=NKRF PE=1 SV=2
197	1	UniProt_human	Q8N556	309	80675	17	17	8	8	0.61	Actin filament-associated protein 1 OS=Homo sapiens GN=AFAP1 PE=1 SV=2
199	1	UniProt_human	Q8IZ52	308	85414	13	13	8	8	0.49	Chondroitin sulfate synthase 2 OS=Homo sapiens GN=CHPF PE=1 SV=2
200	1	UniProt_human	A0A087WZ13	307	77795	12	12	5	5	0.39	Ribonucleoprotein PTB-binding 1 OS=Homo sapiens GN=RAVER1 PE=1 SV=1
201	1	UniProt_human	Q6ZNB6	306	101270	14	14	7	7	0.34	NF-X1-type zinc finger protein NFXL1 OS=Homo sapiens GN=NFXL1 PE=1 SV=2
80	2	UniProt_human	P11216	304	96635	14	14	8	8	0.42	Glycogen phosphorylase, brain form OS=Homo sapiens GN=PYGB PE=1 SV=5
202	1	UniProt_human	Q08945	303	81024	14	14	8	8	0.52	FACT complex subunit SSRP1 OS=Homo sapiens GN=SSRP1 PE=1 SV=1
203	1	UniProt_human	A0A0C4DFN1	301	84106	11	11	8	8	0.5	Mitofusin-1 OS=Homo sapiens GN=MFN1 PE=1 SV=1
204	1	UniProt_human	O14964	300	86138	12	12	9	9	0.56	Hepatocyte growth factor-regulated tyrosine kinase substrate OS=Homo sapiens GN=HGS PE=1 SV=1
205	1	UniProt_human	Q8N0W3	299	117548	10	10	7	7	0.29	L-fucose kinase OS=Homo sapiens GN=FUK PE=2 SV=2
206	1	UniProt_human	A0A0D9SF53	297	81426	12	12	7	7	0.44	ATP-dependent RNA helicase DDX3X OS=Homo sapiens GN=DDX3X PE=1 SV=1
113	2	UniProt_human	Q14161	296	84490	17	17	12	12	0.83	ARF GTPase-activating protein GIT2 OS=Homo sapiens GN=GIT2 PE=1 SV=2
207	1	UniProt_human	P26639	295	83382	15	15	12	12	0.84	Threonine--tRNA ligase, cytoplasmic OS=Homo sapiens GN=TARS PE=1 SV=3
208	1	UniProt_human	Q96J84	293	83484	12	12	7	7	0.43	Kin of IRRE-like protein 1 OS=Homo sapiens GN=KIRREL PE=1 SV=2
209	1	UniProt_human	Q15637-5	290	71706	12	12	6	6	0.43	Isoform 5 of Splicing factor 1 OS=Homo sapiens GN=SF1
210	1	UniProt_human	Q96SB4	285	74278	12	12	7	7	0.49	SRSF protein kinase 1 OS=Homo sapiens GN=SRPK1 PE=1 SV=2
3	9	UniProt_human	Q7Z3Y8	284	49792	14	14	4	4	0.66	Keratin, type I cytoskeletal 27 OS=Homo sapiens GN=KRT27 PE=1 SV=2
211	1	UniProt_human	B7Z6D5	281	86551	14	14	8	8	0.48	Probable ATP-dependent RNA helicase DDX27 OS=Homo sapiens GN=DDX27 PE=1 SV=1
212	1	UniProt_human	P51116	278	74178	9	9	7	7	0.49	Fragile X mental retardation syndrome-related protein 2 OS=Homo sapiens GN=FXR2 PE=1 SV=2
213	1	UniProt_human	P46821	278	270468	17	17	10	10	0.17	Microtubule-associated protein 1B OS=Homo sapiens GN=MAP1B PE=1 SV=2
214	1	UniProt_human	P46060	277	63502	8	8	7	7	0.6	Ran GTPase-activating protein 1 OS=Homo sapiens GN=RANGAP1 PE=1 SV=1
215	1	UniProt_human	H7BXF4	276	94525	15	15	9	9	0.5	Sphingomyelin phosphodiesterase 4 OS=Homo sapiens GN=SMPD4 PE=1 SV=1
216	1	UniProt_human	Q8NB46	276	115004	13	13	8	8	0.34	Serine/threonine-protein phosphatase 6 regulatory ankyrin repeat subunit C OS=Homo sapiens GN=ANKRD52 PE=1 SV=3
217	1	UniProt_human	Q9H6T3	275	75672	9	9	8	8	0.57	RNA polymerase II-associated protein 3 OS=Homo sapiens GN=RPAP3 PE=1 SV=2
218	1	UniProt_human	P52701	275	152689	12	12	10	10	0.32	DNA mismatch repair protein Msh6 OS=Homo sapiens GN=MSH6 PE=1 SV=2
220	1	UniProt_human	E7ER68	274	88931	15	15	10	10	0.61	Protein FAM91A1 OS=Homo sapiens GN=FAM91A1 PE=1 SV=1
219	1	UniProt_human	O60341	274	92845	9	9	8	8	0.44	Lysine-specific histone demethylase 1A OS=Homo sapiens GN=KDM1A PE=1 SV=2
221	1	UniProt_human	Q6PJI9	274	109724	11	11	9	9	0.42	WD repeat-containing protein 59 OS=Homo sapiens GN=WDR59 PE=1 SV=2
30	2	UniProt_human	Q96JG8	271	81327	7	7	4	4	0.23	Melanoma-associated antigen D4 OS=Homo sapiens GN=MAGED4 PE=1 SV=3
222	1	UniProt_human	Q9P035	269	43132	11	11	7	7	0.98	Very-long-chain (3R)-3-hydroxyacyl-CoA dehydratase 3 OS=Homo sapiens GN=HACD3 PE=1 SV=2
223	1	UniProt_human	J3QS39	264	10463	10	10	2	2	1.19	Polyubiquitin-B (Fragment) OS=Homo sapiens GN=UBB PE=1 SV=1
225	1	UniProt_human	Q5H9R7	262	97608	12	12	8	8	0.42	Serine/threonine-protein phosphatase 6 regulatory subunit 3 OS=Homo sapiens GN=PPP6R3 PE=1 SV=2
226	1	UniProt_human	E9PG19	262	86760	12	12	7	7	0.41	F-BAR and double SH3 domains protein 2 OS=Homo sapiens GN=FCHSD2 PE=1 SV=1
224	1	UniProt_human	Q9UDR5	262	102066	9	9	7	7	0.34	Alpha-aminoadipic semialdehyde synthase, mitochondrial OS=Homo sapiens GN=AASS PE=1 SV=1
227	1	UniProt_human	Q75QN2	261	113016	10	10	6	6	0.25	Integrator complex subunit 8 OS=Homo sapiens GN=INTS8 PE=1 SV=1
228	1	UniProt_human	K4DI93	260	102691	15	15	11	11	0.58	Cullin 4B, isoform CRA_e OS=Homo sapiens GN=CUL4B PE=1 SV=1
229	1	UniProt_human	Q92616	259	292572	10	10	9	9	0.14	eIF-2-alpha kinase activator GCN1 OS=Homo sapiens GN=GCN1 PE=1 SV=6
230	1	UniProt_human	P29966	258	31536	9	9	4	4	0.71	Myristoylated alanine-rich C-kinase substrate OS=Homo sapiens GN=MARCKS PE=1 SV=4
231	1	UniProt_human	A0A075B7G8	256	76662	15	15	6	6	0.39	Amyloid beta A4 precursor protein-binding family B member 1 OS=Homo sapiens GN=APBB1 PE=1 SV=7
232	1	UniProt_human	Q8TEX9	253	118640	6	6	5	5	0.2	Importin-4 OS=Homo sapiens GN=IPO4 PE=1 SV=2
233	1	UniProt_human	Q86UT6	251	107548	15	15	11	11	0.54	NLR family member X1 OS=Homo sapiens GN=NLRX1 PE=1 SV=1
234	1	UniProt_human	Q63ZY3	249	91118	8	8	7	7	0.39	KN motif and ankyrin repeat domain-containing protein 2 OS=Homo sapiens GN=KANK2 PE=1 SV=1
236	1	UniProt_human	Q5MIZ7	248	97397	12	12	9	9	0.48	Serine/threonine-protein phosphatase 4 regulatory subunit 3B OS=Homo sapiens GN=PPP4R3B PE=1 SV=2
235	1	UniProt_human	Q96KP1	248	104000	11	11	9	9	0.44	Exocyst complex component 2 OS=Homo sapiens GN=EXOC2 PE=1 SV=1
237	1	UniProt_human	D3DQV9	247	102265	15	15	12	12	0.65	Eukaryotic translation initiation factor 4 gamma 2 (Fragment) OS=Homo sapiens GN=EIF4G2 PE=1 SV=1
239	1	UniProt_human	P57078	247	91553	10	10	8	8	0.45	Receptor-interacting serine/threonine-protein kinase 4 OS=Homo sapiens GN=RIPK4 PE=1 SV=1
238	1	UniProt_human	Q8IWZ6	247	80302	11	11	7	7	0.45	Bardet-Biedl syndrome 7 protein OS=Homo sapiens GN=BBS7 PE=1 SV=2
240	1	UniProt_human	O95782	245	107478	11	11	8	8	0.37	AP-2 complex subunit alpha-1 OS=Homo sapiens GN=AP2A1 PE=1 SV=3
242	1	UniProt_human	Q13033	243	87155	13	13	9	9	0.55	Striatin-3 OS=Homo sapiens GN=STRN3 PE=1 SV=3
241	1	UniProt_human	Q9BQ52	243	92160	12	12	7	7	0.38	Zinc phosphodiesterase ELAC protein 2 OS=Homo sapiens GN=ELAC2 PE=1 SV=2
243	1	UniProt_human	P13473	239	44932	8	8	3	3	0.33	Lysosome-associated membrane glycoprotein 2 OS=Homo sapiens GN=LAMP2 PE=1 SV=2
244	1	UniProt_human	E3W994	233	138778	8	8	7	7	0.24	CLIP-associating protein 2 OS=Homo sapiens GN=CLASP2 PE=1 SV=2
246	1	UniProt_human	Q8TCY9	230	104921	12	12	9	9	0.44	Up-regulator of cell proliferation OS=Homo sapiens GN=URGCP PE=1 SV=2
247	1	UniProt_human	Q08AM6	230	87917	8	8	5	5	0.27	Protein VAC14 homolog OS=Homo sapiens GN=VAC14 PE=1 SV=1
245	1	UniProt_human	Q53ET0	230	73256	5	5	4	4	0.26	CREB-regulated transcription coactivator 2 OS=Homo sapiens GN=CRTC2 PE=1 SV=2
249	1	UniProt_human	P85037	229	75411	5	5	4	4	0.25	Forkhead box protein K1 OS=Homo sapiens GN=FOXK1 PE=1 SV=1
248	1	UniProt_human	Q96P47	229	94985	6	6	5	5	0.25	Arf-GAP with GTPase, ANK repeat and PH domain-containing protein 3 OS=Homo sapiens GN=AGAP3 PE=1 SV=2
250	1	UniProt_human	H0YDS2	228	23638	6	6	3	3	0.7	Probable tRNA (uracil-O(2)-)-methyltransferase (Fragment) OS=Homo sapiens GN=TRMT44 PE=1 SV=1
128	2	UniProt_human	P08237	228	85128	14	14	10	10	0.65	ATP-dependent 6-phosphofructokinase, muscle type OS=Homo sapiens GN=PFKM PE=1 SV=2
251	1	UniProt_human	A0A087WVI0	228	104721	14	14	10	10	0.56	Conserved oligomeric Golgi complex subunit 1 OS=Homo sapiens GN=COG1 PE=1 SV=1
252	1	UniProt_human	Q7Z2W4	225	101367	10	10	7	7	0.34	Zinc finger CCCH-type antiviral protein 1 OS=Homo sapiens GN=ZC3HAV1 PE=1 SV=3
254	1	UniProt_human	Q9ULE6	224	96693	9	9	6	6	0.3	Paladin OS=Homo sapiens GN=PALD1 PE=1 SV=3
253	1	UniProt_human	Q93063	224	82202	6	6	4	4	0.23	Exostosin-2 OS=Homo sapiens GN=EXT2 PE=1 SV=1
255	1	UniProt_human	A8MT40	222	88513	12	12	10	10	0.62	Pyruvate dehydrogenase phosphatase regulatory subunit, mitochondrial OS=Homo sapiens GN=PDPR PE=1 SV=2
256	1	UniProt_human	Q9UNK9	220	75227	8	8	5	5	0.33	Protein angel homolog 1 OS=Homo sapiens GN=ANGEL1 PE=1 SV=1
257	1	UniProt_human	Q5VUJ6	212	84536	6	6	5	5	0.29	Leucine-rich repeat and calponin homology domain-containing protein 2 OS=Homo sapiens GN=LRCH2 PE=2 SV=2
259	1	UniProt_human	Q8TDD1	211	98534	13	13	11	11	0.61	ATP-dependent RNA helicase DDX54 OS=Homo sapiens GN=DDX54 PE=1 SV=2
258	1	UniProt_human	Q5HY54	211	276378	10	10	9	9	0.15	Filamin-A OS=Homo sapiens GN=FLNA PE=1 SV=1
260	1	UniProt_human	Q5VTE0	210	50153	9	9	4	4	0.4	Putative elongation factor 1-alpha-like 3 OS=Homo sapiens GN=EEF1A1P5 PE=5 SV=1
261	1	UniProt_human	J3QS41	210	218920	5	5	4	4	0.08	Probable helicase with zinc finger domain OS=Homo sapiens GN=HELZ PE=1 SV=1
262	1	UniProt_human	Q9UHB6	209	85173	8	8	5	5	0.28	LIM domain and actin-binding protein 1 OS=Homo sapiens GN=LIMA1 PE=1 SV=1
263	1	UniProt_human	P13807	208	83732	11	11	7	7	0.43	Glycogen [starch] synthase, muscle OS=Homo sapiens GN=GYS1 PE=1 SV=2
264	1	UniProt_human	O15397	207	119861	11	11	7	7	0.28	Importin-8 OS=Homo sapiens GN=IPO8 PE=1 SV=2
265	1	UniProt_human	K7ELL7	206	60154	7	7	3	3	0.24	Glucosidase 2 subunit beta OS=Homo sapiens GN=PRKCSH PE=1 SV=1
266	1	UniProt_human	Q53R41	205	97348	11	11	7	7	0.36	FAST kinase domain-containing protein 1, mitochondrial OS=Homo sapiens GN=FASTKD1 PE=1 SV=1
267	1	UniProt_human	Q86UK7	204	98575	9	9	8	8	0.41	Zinc finger protein 598 OS=Homo sapiens GN=ZNF598 PE=1 SV=1
268	1	UniProt_human	Q9C026-5	202	61306	6	6	4	4	0.32	Isoform 5 of E3 ubiquitin-protein ligase TRIM9 OS=Homo sapiens GN=TRIM9
269	1	UniProt_human	Q12929	198	91824	8	8	6	6	0.32	Epidermal growth factor receptor kinase substrate 8 OS=Homo sapiens GN=EPS8 PE=1 SV=1
270	1	UniProt_human	Q9UL03	197	100326	7	7	5	5	0.24	Integrator complex subunit 6 OS=Homo sapiens GN=INTS6 PE=1 SV=1
271	1	UniProt_human	Q71RC2	196	80546	7	7	5	5	0.3	La-related protein 4 OS=Homo sapiens GN=LARP4 PE=1 SV=3
272	1	UniProt_human	Q15393	196	135492	6	6	5	5	0.17	Splicing factor 3B subunit 3 OS=Homo sapiens GN=SF3B3 PE=1 SV=4
171	3	UniProt_human	A0A0G2JIW1	194	70066	6	6	5	5	0.35	Heat shock 70 kDa protein 1B OS=Homo sapiens GN=HSPA1B PE=1 SV=1
274	1	UniProt_human	Q96S55	193	72088	6	6	5	5	0.34	ATPase WRNIP1 OS=Homo sapiens GN=WRNIP1 PE=1 SV=2
273	1	UniProt_human	Q6P4Q7	193	86552	5	5	4	4	0.22	Metal transporter CNNM4 OS=Homo sapiens GN=CNNM4 PE=1 SV=3
277	1	UniProt_human	Q86UA1	190	78381	12	12	9	9	0.63	Pre-mRNA-processing factor 39 OS=Homo sapiens GN=PRPF39 PE=1 SV=3
276	1	UniProt_human	O60568	190	84731	8	8	5	5	0.28	Procollagen-lysine,2-oxoglutarate 5-dioxygenase 3 OS=Homo sapiens GN=PLOD3 PE=1 SV=1
275	1	UniProt_human	B5MBZ0	190	110109	6	6	4	4	0.17	Echinoderm microtubule-associated protein-like 4 OS=Homo sapiens GN=EML4 PE=1 SV=3
240	2	UniProt_human	O94973	189	103895	10	10	9	9	0.44	AP-2 complex subunit alpha-2 OS=Homo sapiens GN=AP2A2 PE=1 SV=2
279	1	UniProt_human	Q92542	189	78362	9	9	5	5	0.31	Nicastrin OS=Homo sapiens GN=NCSTN PE=1 SV=2
280	1	UniProt_human	Q8N766	189	111689	9	9	6	6	0.26	ER membrane protein complex subunit 1 OS=Homo sapiens GN=EMC1 PE=1 SV=1
278	1	UniProt_human	P78347	189	112346	7	7	5	5	0.21	General transcription factor II-I OS=Homo sapiens GN=GTF2I PE=1 SV=2
282	1	UniProt_human	O43395	188	77481	9	9	6	6	0.39	U4/U6 small nuclear ribonucleoprotein Prp3 OS=Homo sapiens GN=PRPF3 PE=1 SV=2
283	1	UniProt_human	O43747	188	91293	7	7	5	5	0.26	AP-1 complex subunit gamma-1 OS=Homo sapiens GN=AP1G1 PE=1 SV=5
281	1	UniProt_human	Q8TCS8	188	85897	5	5	4	4	0.22	Polyribonucleotide nucleotidyltransferase 1, mitochondrial OS=Homo sapiens GN=PNPT1 PE=1 SV=2
284	1	UniProt_human	Q9Y2G8	187	90534	10	10	10	10	0.6	DnaJ homolog subfamily C member 16 OS=Homo sapiens GN=DNAJC16 PE=2 SV=3
285	1	UniProt_human	Q08211	186	140869	7	7	4	4	0.13	ATP-dependent RNA helicase A OS=Homo sapiens GN=DHX9 PE=1 SV=4
287	1	UniProt_human	Q8TAG9	184	93663	9	9	7	7	0.37	Exocyst complex component 6 OS=Homo sapiens GN=EXOC6 PE=1 SV=3
286	1	UniProt_human	Q9Y2L1	184	108934	4	4	3	3	0.12	Exosome complex exonuclease RRP44 OS=Homo sapiens GN=DIS3 PE=1 SV=2
289	1	UniProt_human	O43390	183	70899	8	8	7	7	0.52	Heterogeneous nuclear ribonucleoprotein R OS=Homo sapiens GN=HNRNPR PE=1 SV=1
288	1	UniProt_human	Q9HCS7	183	99946	7	7	5	5	0.24	Pre-mRNA-splicing factor SYF1 OS=Homo sapiens GN=XAB2 PE=1 SV=2
290	1	UniProt_human	Q709F0	183	87228	5	5	4	4	0.21	Acyl-CoA dehydrogenase family member 11 OS=Homo sapiens GN=ACAD11 PE=1 SV=2
291	1	UniProt_human	Q15031	182	101911	9	9	7	7	0.34	Probable leucine--tRNA ligase, mitochondrial OS=Homo sapiens GN=LARS2 PE=1 SV=2
293	1	UniProt_human	Q9UGP8	179	87942	11	11	8	8	0.47	Translocation protein SEC63 homolog OS=Homo sapiens GN=SEC63 PE=1 SV=2
292	1	UniProt_human	Q9Y4H2	179	137249	8	8	6	6	0.2	Insulin receptor substrate 2 OS=Homo sapiens GN=IRS2 PE=1 SV=2
294	1	UniProt_human	Q9NRL3	178	80546	8	8	7	7	0.45	Striatin-4 OS=Homo sapiens GN=STRN4 PE=1 SV=2
295	1	UniProt_human	K7EPW5	177	7190	3	3	1	1	0.75	E3 ubiquitin-protein ligase Praja-1 (Fragment) OS=Homo sapiens GN=PJA1 PE=1 SV=1
296	1	UniProt_human	P02786	176	84818	11	11	8	8	0.49	Transferrin receptor protein 1 OS=Homo sapiens GN=TFRC PE=1 SV=2
297	1	UniProt_human	Q13546	174	75883	4	4	3	3	0.18	Receptor-interacting serine/threonine-protein kinase 1 OS=Homo sapiens GN=RIPK1 PE=1 SV=3
298	1	UniProt_human	Q86UE4	172	63799	4	4	4	4	0.3	Protein LYRIC OS=Homo sapiens GN=MTDH PE=1 SV=2
300	1	UniProt_human	Q14137	172	83577	7	7	5	5	0.29	Ribosome biogenesis protein BOP1 OS=Homo sapiens GN=BOP1 PE=1 SV=2
299	1	UniProt_human	A0A0U1RR32	172	18470	3	3	1	1	0.25	Histone H2A OS=Homo sapiens GN=hCG_2039566 PE=3 SV=1
302	1	UniProt_human	Q9NXC5	171	98521	8	8	7	7	0.35	WD repeat-containing protein mio OS=Homo sapiens GN=MIOS PE=1 SV=2
303	1	UniProt_human	Q6P9B9	171	107927	9	9	5	5	0.22	Integrator complex subunit 5 OS=Homo sapiens GN=INTS5 PE=1 SV=1
301	1	UniProt_human	O94782	171	88152	4	4	4	4	0.21	Ubiquitin carboxyl-terminal hydrolase 1 OS=Homo sapiens GN=USP1 PE=1 SV=1
304	1	UniProt_human	O15084	171	112894	5	5	3	3	0.12	Serine/threonine-protein phosphatase 6 regulatory ankyrin repeat subunit A OS=Homo sapiens GN=ANKRD28 PE=1 SV=5
305	1	UniProt_human	O75175	170	81822	7	7	4	4	0.23	CCR4-NOT transcription complex subunit 3 OS=Homo sapiens GN=CNOT3 PE=1 SV=1
306	1	UniProt_human	E9PIF2	170	96395	4	4	4	4	0.19	Probable ATP-dependent RNA helicase DDX10 OS=Homo sapiens GN=DDX10 PE=1 SV=1
308	1	UniProt_human	Q05209	169	88051	7	7	6	6	0.34	Tyrosine-protein phosphatase non-receptor type 12 OS=Homo sapiens GN=PTPN12 PE=1 SV=3
307	1	UniProt_human	O15381	169	94991	6	6	5	5	0.25	Nuclear valosin-containing protein-like OS=Homo sapiens GN=NVL PE=1 SV=1
309	1	UniProt_human	Q8NBP0	169	96751	5	5	5	5	0.25	Tetratricopeptide repeat protein 13 OS=Homo sapiens GN=TTC13 PE=2 SV=3
310	1	UniProt_human	Q86WA8	168	94557	6	6	6	6	0.31	Lon protease homolog 2, peroxisomal OS=Homo sapiens GN=LONP2 PE=1 SV=1
311	1	UniProt_human	P23921	166	90013	9	9	7	7	0.39	Ribonucleoside-diphosphate reductase large subunit OS=Homo sapiens GN=RRM1 PE=1 SV=1
312	1	UniProt_human	Q6ZRP7	166	77480	4	4	2	2	0.12	Sulfhydryl oxidase 2 OS=Homo sapiens GN=QSOX2 PE=1 SV=3
313	1	UniProt_human	Q01968	165	104138	9	9	6	6	0.28	Inositol polyphosphate 5-phosphatase OCRL-1 OS=Homo sapiens GN=OCRL PE=1 SV=3
314	1	UniProt_human	Q9NW13	164	85685	8	8	6	6	0.35	RNA-binding protein 28 OS=Homo sapiens GN=RBM28 PE=1 SV=3
315	1	UniProt_human	A0A0A0MS45	164	87128	7	7	6	6	0.34	Conserved oligomeric Golgi complex subunit 4 OS=Homo sapiens GN=COG4 PE=1 SV=1
316	1	UniProt_human	O15294	163	116850	12	12	8	8	0.34	UDP-N-acetylglucosamine--peptide N-acetylglucosaminyltransferase 110 kDa subunit OS=Homo sapiens GN=OGT PE=1 SV=3
317	1	UniProt_human	A0A0A6YYC0	163	78318	6	6	4	4	0.24	Ribosomal protein S6 kinase alpha-4 (Fragment) OS=Homo sapiens GN=RPS6KA4 PE=1 SV=5
318	1	UniProt_human	Q8TB52	163	82251	3	3	1	1	0.05	F-box only protein 30 OS=Homo sapiens GN=FBXO30 PE=1 SV=3
319	1	UniProt_human	Q5SW79	162	175187	8	8	7	7	0.19	Centrosomal protein of 170 kDa OS=Homo sapiens GN=CEP170 PE=1 SV=1
12	2	UniProt_human	Q15029	161	109366	7	7	6	6	0.26	116 kDa U5 small nuclear ribonucleoprotein component OS=Homo sapiens GN=EFTUD2 PE=1 SV=1
320	1	UniProt_human	O00139	160	79905	6	6	4	4	0.24	Kinesin-like protein KIF2A OS=Homo sapiens GN=KIF2A PE=1 SV=3
322	1	UniProt_human	Q9BUQ8	158	95524	14	14	10	10	0.56	Probable ATP-dependent RNA helicase DDX23 OS=Homo sapiens GN=DDX23 PE=1 SV=3
321	1	UniProt_human	E9PFK5	158	88810	6	6	3	3	0.15	Nucleolar protein 14 OS=Homo sapiens GN=NOP14 PE=1 SV=1
323	1	UniProt_human	A0A0A6YYG7	157	66215	8	8	6	6	0.47	Condensin-2 complex subunit H2 OS=Homo sapiens GN=NCAPH2 PE=1 SV=1
324	1	UniProt_human	Q1L5Z9	156	83600	10	10	8	8	0.5	LON peptidase N-terminal domain and RING finger protein 2 OS=Homo sapiens GN=LONRF2 PE=2 SV=3
325	1	UniProt_human	Q04864	155	68476	12	12	7	7	0.54	Proto-oncogene c-Rel OS=Homo sapiens GN=REL PE=1 SV=1
326	1	UniProt_human	P04844	154	69241	7	7	6	6	0.44	Dolichyl-diphosphooligosaccharide--protein glycosyltransferase subunit 2 OS=Homo sapiens GN=RPN2 PE=1 SV=3
327	1	UniProt_human	P15924	154	331569	9	9	7	7	0.09	Desmoplakin OS=Homo sapiens GN=DSP PE=1 SV=3
328	1	UniProt_human	Q2VPB7	153	93890	5	5	5	5	0.25	AP-5 complex subunit beta-1 OS=Homo sapiens GN=AP5B1 PE=1 SV=4
329	1	UniProt_human	A3KMH1-2	153	116867	5	5	5	5	0.2	Isoform 2 of von Willebrand factor A domain-containing protein 8 OS=Homo sapiens GN=VWA8
330	1	UniProt_human	J3KP15	152	15362	5	5	2	2	0.72	Serine/arginine-rich-splicing factor 2 (Fragment) OS=Homo sapiens GN=SRSF2 PE=1 SV=8
331	1	UniProt_human	C9JJX6	152	96769	7	7	7	7	0.36	Armadillo repeat protein deleted in velo-cardio-facial syndrome OS=Homo sapiens GN=ARVCF PE=1 SV=1
332	1	UniProt_human	A0A1B0GVI7	152	90524	4	4	3	3	0.15	Uncharacterized protein (Fragment) OS=Homo sapiens PE=4 SV=1
333	1	UniProt_human	Q8N0X7	151	72788	7	7	4	4	0.26	Spartin OS=Homo sapiens GN=SPG20 PE=1 SV=1
228	2	UniProt_human	Q13619	150	87624	9	9	8	8	0.47	Cullin-4A OS=Homo sapiens GN=CUL4A PE=1 SV=3
334	1	UniProt_human	A0A0C4DGH5	150	85355	8	8	6	6	0.35	Cullin-associated NEDD8-dissociated protein 1 (Fragment) OS=Homo sapiens GN=CAND1 PE=1 SV=1
163	2	UniProt_human	A0A087WVC1	150	82176	8	8	4	4	0.29	ATP-dependent RNA helicase DDX50 OS=Homo sapiens GN=DDX50 PE=1 SV=1
335	1	UniProt_human	Q9H2J7	150	81783	5	5	4	4	0.23	Sodium-dependent neutral amino acid transporter B(0)AT2 OS=Homo sapiens GN=SLC6A15 PE=1 SV=1
336	1	UniProt_human	Q9UKN8	148	91923	7	7	5	5	0.26	General transcription factor 3C polypeptide 4 OS=Homo sapiens GN=GTF3C4 PE=1 SV=2
337	1	UniProt_human	Q6NSJ2	147	71867	4	4	4	4	0.27	Pleckstrin homology-like domain family B member 3 OS=Homo sapiens GN=PHLDB3 PE=2 SV=3
338	1	UniProt_human	P19447	147	89221	4	4	3	3	0.15	TFIIH basal transcription factor complex helicase XPB subunit OS=Homo sapiens GN=ERCC3 PE=1 SV=1
339	1	UniProt_human	A0A0A0MST9	146	74045	6	6	6	6	0.41	MAP/microtubule affinity-regulating kinase 3 OS=Homo sapiens GN=MARK3 PE=1 SV=1
341	1	UniProt_human	Q96AQ6	146	80594	5	5	4	4	0.23	Pre-B-cell leukemia transcription factor-interacting protein 1 OS=Homo sapiens GN=PBXIP1 PE=1 SV=1
342	1	UniProt_human	P55265	146	135981	6	6	5	5	0.17	Double-stranded RNA-specific adenosine deaminase OS=Homo sapiens GN=ADAR PE=1 SV=4
340	1	UniProt_human	A0A0B4J1W0	146	112939	2	2	2	2	0.08	Mediator of RNA polymerase II transcription subunit 24 OS=Homo sapiens GN=MED24 PE=1 SV=1
343	1	UniProt_human	O60763	144	107828	6	6	5	5	0.22	General vesicular transport factor p115 OS=Homo sapiens GN=USO1 PE=1 SV=2
344	1	UniProt_human	O95486	143	119674	5	5	5	5	0.19	Protein transport protein Sec24A OS=Homo sapiens GN=SEC24A PE=1 SV=2
345	1	UniProt_human	Q02878	142	32708	7	7	5	5	0.9	60S ribosomal protein L6 OS=Homo sapiens GN=RPL6 PE=1 SV=3
347	1	UniProt_human	A0A0A0MRG2	142	75062	4	4	4	4	0.25	Amyloid beta A4 protein OS=Homo sapiens GN=APP PE=1 SV=1
348	1	UniProt_human	U3KQK0	142	18792	2	2	1	1	0.25	Histone H2B OS=Homo sapiens GN=HIST1H2BN PE=1 SV=1
346	1	UniProt_human	Q9Y2X0	142	96731	3	3	3	3	0.14	Mediator of RNA polymerase II transcription subunit 16 OS=Homo sapiens GN=MED16 PE=1 SV=2
349	1	UniProt_human	F8W717	141	88662	8	8	6	6	0.33	Echinoderm microtubule-associated protein-like 1 OS=Homo sapiens GN=EML1 PE=1 SV=1
350	1	UniProt_human	Q9P244	141	82266	3	3	3	3	0.17	Leucine-rich repeat and fibronectin type III domain-containing protein 1 OS=Homo sapiens GN=LRFN1 PE=1 SV=2
353	1	UniProt_human	A0A087WZ40	140	87766	4	4	4	4	0.21	Ensconsin OS=Homo sapiens GN=MAP7 PE=1 SV=1
351	1	UniProt_human	Q9UDY8	140	92213	4	4	4	4	0.2	Mucosa-associated lymphoid tissue lymphoma translocation protein 1 OS=Homo sapiens GN=MALT1 PE=1 SV=1
352	1	UniProt_human	Q99570	140	153007	4	4	3	3	0.09	Phosphoinositide 3-kinase regulatory subunit 4 OS=Homo sapiens GN=PIK3R4 PE=1 SV=3
354	1	UniProt_human	P52735	139	101224	4	4	3	3	0.13	Guanine nucleotide exchange factor VAV2 OS=Homo sapiens GN=VAV2 PE=1 SV=2
356	1	UniProt_human	D6RB59	138	53208	5	5	4	4	0.37	Exocyst complex component 3 OS=Homo sapiens GN=EXOC3 PE=1 SV=1
355	1	UniProt_human	B4DTS2	138	97681	11	11	6	6	0.3	Serine/threonine-protein kinase OS=Homo sapiens GN=PRKD2 PE=1 SV=1
357	1	UniProt_human	Q5T447	138	97051	7	7	5	5	0.24	E3 ubiquitin-protein ligase HECTD3 OS=Homo sapiens GN=HECTD3 PE=1 SV=1
358	1	UniProt_human	P83436	138	86289	4	4	3	3	0.16	Conserved oligomeric Golgi complex subunit 7 OS=Homo sapiens GN=COG7 PE=1 SV=1
359	1	UniProt_human	A0A087X011	137	82713	8	8	6	6	0.36	Kinesin-like protein OS=Homo sapiens GN=KIF3A PE=1 SV=1
360	1	UniProt_human	Q8N8S7	135	66470	7	7	5	5	0.38	Protein enabled homolog OS=Homo sapiens GN=ENAH PE=1 SV=2
361	1	UniProt_human	Q9NZQ3	135	78910	5	5	3	3	0.18	NCK-interacting protein with SH3 domain OS=Homo sapiens GN=NCKIPSD PE=1 SV=1
366	1	UniProt_human	H0YGW7	134	67619	5	5	4	4	0.29	ATP-binding cassette sub-family F member 1 (Fragment) OS=Homo sapiens GN=ABCF1 PE=1 SV=1
363	1	UniProt_human	O95202	134	83302	4	4	4	4	0.23	LETM1 and EF-hand domain-containing protein 1, mitochondrial OS=Homo sapiens GN=LETM1 PE=1 SV=1
362	1	UniProt_human	Q7Z5L2-2	134	86240	5	5	4	4	0.22	Isoform 2 of Coiled-coil domain-containing protein R3HCC1L OS=Homo sapiens GN=R3HCC1L
364	1	UniProt_human	Q9H1I8	134	86306	5	5	4	4	0.22	Activating signal cointegrator 1 complex subunit 2 OS=Homo sapiens GN=ASCC2 PE=1 SV=3
365	1	UniProt_human	Q6NUQ1	134	90574	5	5	4	4	0.21	RAD50-interacting protein 1 OS=Homo sapiens GN=RINT1 PE=1 SV=1
368	1	UniProt_human	F8W7U8	133	80472	7	7	6	6	0.37	Double-strand break repair protein MRE11A OS=Homo sapiens GN=MRE11A PE=1 SV=1
367	1	UniProt_human	Q9NV66	133	83649	3	3	3	3	0.16	S-adenosyl-L-methionine-dependent tRNA 4-demethylwyosine synthase OS=Homo sapiens GN=TYW1 PE=2 SV=2
369	1	UniProt_human	O00469	132	84632	5	5	5	5	0.29	Procollagen-lysine,2-oxoglutarate 5-dioxygenase 2 OS=Homo sapiens GN=PLOD2 PE=1 SV=2
370	1	UniProt_human	E7ETY4	132	78404	4	4	4	4	0.24	Serine/threonine-protein kinase MARK2 OS=Homo sapiens GN=MARK2 PE=1 SV=1
371	1	UniProt_human	P06400	129	106092	5	5	5	5	0.22	Retinoblastoma-associated protein OS=Homo sapiens GN=RB1 PE=1 SV=2
373	1	UniProt_human	P53985	128	53909	6	6	4	4	0.37	Monocarboxylate transporter 1 OS=Homo sapiens GN=SLC16A1 PE=1 SV=3
372	1	UniProt_human	Q13144	128	80329	5	5	3	3	0.17	Translation initiation factor eIF-2B subunit epsilon OS=Homo sapiens GN=EIF2B5 PE=1 SV=3
374	1	UniProt_human	Q13618	127	88873	5	5	5	5	0.27	Cullin-3 OS=Homo sapiens GN=CUL3 PE=1 SV=2
376	1	UniProt_human	A0A087WV86	127	69082	3	3	3	3	0.2	Protein aurora borealis OS=Homo sapiens GN=BORA PE=1 SV=1
375	1	UniProt_human	Q9H9A5	127	82258	5	5	2	2	0.11	CCR4-NOT transcription complex subunit 10 OS=Homo sapiens GN=CNOT10 PE=1 SV=1
377	1	UniProt_human	Q32P28	126	83341	5	5	5	5	0.29	Prolyl 3-hydroxylase 1 OS=Homo sapiens GN=P3H1 PE=1 SV=2
378	1	UniProt_human	Q8IWF2	126	77743	4	4	3	3	0.18	FAD-dependent oxidoreductase domain-containing protein 2 OS=Homo sapiens GN=FOXRED2 PE=1 SV=1
379	1	UniProt_human	P49792	125	357974	6	6	5	5	0.06	E3 SUMO-protein ligase RanBP2 OS=Homo sapiens GN=RANBP2 PE=1 SV=2
381	1	UniProt_human	Q9UP83	124	92685	4	4	4	4	0.2	Conserved oligomeric Golgi complex subunit 5 OS=Homo sapiens GN=COG5 PE=1 SV=3
380	1	UniProt_human	A0A0A0MTN0	124	88448	4	4	3	3	0.15	Cullin-2 OS=Homo sapiens GN=CUL2 PE=1 SV=1
382	1	UniProt_human	P36578	123	47667	6	6	4	4	0.43	60S ribosomal protein L4 OS=Homo sapiens GN=RPL4 PE=1 SV=5
383	1	UniProt_human	Q5VY60	123	91071	4	4	3	3	0.15	HAUS augmin-like complex subunit 6 OS=Homo sapiens GN=HAUS6 PE=1 SV=1
385	1	UniProt_human	F5GX80	122	23465	4	4	3	3	0.71	Zinc finger CCHC domain-containing protein 8 (Fragment) OS=Homo sapiens GN=ZCCHC8 PE=1 SV=1
386	1	UniProt_human	Q9NSG2	122	96492	7	7	5	5	0.25	Uncharacterized protein C1orf112 OS=Homo sapiens GN=C1orf112 PE=1 SV=1
387	1	UniProt_human	Q7Z2T5	122	81695	5	5	4	4	0.23	TRMT1-like protein OS=Homo sapiens GN=TRMT1L PE=1 SV=2
388	1	UniProt_human	A0A0D9SES8	122	83131	4	4	2	2	0.11	Transducin-like enhancer protein 3 OS=Homo sapiens GN=TLE3 PE=1 SV=1
384	1	UniProt_human	Q15678	122	135175	4	4	3	3	0.1	Tyrosine-protein phosphatase non-receptor type 14 OS=Homo sapiens GN=PTPN14 PE=1 SV=2
389	1	UniProt_human	Q8NE01	121	76072	5	5	4	4	0.25	Metal transporter CNNM3 OS=Homo sapiens GN=CNNM3 PE=1 SV=1
391	1	UniProt_human	G3V3G9	121	84700	3	3	2	2	0.11	Uncharacterized protein OS=Homo sapiens PE=4 SV=1
390	1	UniProt_human	Q96D09	121	93715	3	3	2	2	0.09	G-protein coupled receptor-associated sorting protein 2 OS=Homo sapiens GN=GPRASP2 PE=1 SV=1
392	1	UniProt_human	Q9BPX3	120	114262	3	3	3	3	0.12	Condensin complex subunit 3 OS=Homo sapiens GN=NCAPG PE=1 SV=1
393	1	UniProt_human	Q86VS8	119	83074	4	4	4	4	0.23	Protein Hook homolog 3 OS=Homo sapiens GN=HOOK3 PE=1 SV=2
394	1	UniProt_human	Q9H269	118	94634	3	3	2	2	0.09	Vacuolar protein sorting-associated protein 16 homolog OS=Homo sapiens GN=VPS16 PE=1 SV=2
395	1	UniProt_human	P43007	117	55688	4	4	3	3	0.26	Neutral amino acid transporter A OS=Homo sapiens GN=SLC1A4 PE=1 SV=1
396	1	UniProt_human	E9PCR7	117	117590	6	6	6	6	0.24	2-oxoglutarate dehydrogenase, mitochondrial OS=Homo sapiens GN=OGDH PE=1 SV=1
397	1	UniProt_human	Q8TEK3	117	184740	3	3	1	1	0.02	Histone-lysine N-methyltransferase, H3 lysine-79 specific OS=Homo sapiens GN=DOT1L PE=1 SV=2
401	1	UniProt_human	Q5JR04	116	107142	6	6	6	6	0.27	Mov10, Moloney leukemia virus 10, homolog (Mouse), isoform CRA_a OS=Homo sapiens GN=MOV10 PE=1 SV=1
400	1	UniProt_human	Q9H089	116	75178	4	4	3	3	0.18	Large subunit GTPase 1 homolog OS=Homo sapiens GN=LSG1 PE=1 SV=2
399	1	UniProt_human	Q969S9	116	86546	4	4	3	3	0.16	Ribosome-releasing factor 2, mitochondrial OS=Homo sapiens GN=GFM2 PE=1 SV=1
398	1	UniProt_human	F8VPD4	116	235873	5	5	3	3	0.06	CAD protein OS=Homo sapiens GN=CAD PE=1 SV=1
402	1	UniProt_human	Q92625	115	123032	5	5	4	4	0.15	Ankyrin repeat and SAM domain-containing protein 1A OS=Homo sapiens GN=ANKS1A PE=1 SV=4
403	1	UniProt_human	P21980	114	77280	5	5	3	3	0.18	Protein-glutamine gamma-glutamyltransferase 2 OS=Homo sapiens GN=TGM2 PE=1 SV=2
404	1	UniProt_human	F8VUA7	113	79004	4	4	2	2	0.11	Oxysterol-binding protein (Fragment) OS=Homo sapiens GN=OSBPL8 PE=1 SV=8
407	1	UniProt_human	Q9UKV8	112	97146	6	6	6	6	0.3	Protein argonaute-2 OS=Homo sapiens GN=AGO2 PE=1 SV=3
406	1	UniProt_human	Q8IXI1	112	68075	4	4	3	3	0.21	Mitochondrial Rho GTPase 2 OS=Homo sapiens GN=RHOT2 PE=1 SV=2
408	1	UniProt_human	Q96JB2	112	94036	4	4	3	3	0.15	Conserved oligomeric Golgi complex subunit 3 OS=Homo sapiens GN=COG3 PE=1 SV=3
405	1	UniProt_human	D3YTB5	112	76012	2	2	2	2	0.12	Interleukin-1 receptor-associated kinase 1 OS=Homo sapiens GN=IRAK1 PE=1 SV=1
409	1	UniProt_human	P49588	112	106743	3	3	2	2	0.08	Alanine--tRNA ligase, cytoplasmic OS=Homo sapiens GN=AARS PE=1 SV=2
411	1	UniProt_human	F8WAU4	108	50879	4	4	4	4	0.39	Elongation factor G, mitochondrial OS=Homo sapiens GN=GFM1 PE=1 SV=1
410	1	UniProt_human	Q9UNX4	108	106032	5	5	5	5	0.22	WD repeat-containing protein 3 OS=Homo sapiens GN=WDR3 PE=1 SV=1
413	1	UniProt_human	Q8IXW5	107	69466	5	5	5	5	0.36	Putative RNA polymerase II subunit B1 CTD phosphatase RPAP2 OS=Homo sapiens GN=RPAP2 PE=1 SV=1
412	1	UniProt_human	P42166	107	75446	4	4	3	3	0.18	Lamina-associated polypeptide 2, isoform alpha OS=Homo sapiens GN=TMPO PE=1 SV=2
414	1	UniProt_human	Q9Y3T9	107	84866	5	5	3	3	0.16	Nucleolar complex protein 2 homolog OS=Homo sapiens GN=NOC2L PE=1 SV=4
417	1	UniProt_human	Q13627	106	85530	4	4	3	3	0.16	Dual specificity tyrosine-phosphorylation-regulated kinase 1A OS=Homo sapiens GN=DYRK1A PE=1 SV=2
415	1	UniProt_human	H0Y2Y8	106	57606	3	3	2	2	0.16	Zyxin (Fragment) OS=Homo sapiens GN=ZYX PE=1 SV=1
416	1	UniProt_human	P38435	106	87505	4	4	2	2	0.1	Vitamin K-dependent gamma-carboxylase OS=Homo sapiens GN=GGCX PE=1 SV=2
420	1	UniProt_human	Q96ED9	105	83155	5	5	4	4	0.23	Protein Hook homolog 2 OS=Homo sapiens GN=HOOK2 PE=1 SV=3
418	1	UniProt_human	B4E0T2	105	73137	3	3	3	3	0.19	Peroxisomal targeting signal 1 receptor OS=Homo sapiens GN=PEX5 PE=1 SV=1
419	1	UniProt_human	O95373	105	119440	4	4	3	3	0.11	Importin-7 OS=Homo sapiens GN=IPO7 PE=1 SV=1
422	1	UniProt_human	Q14444	104	78318	7	7	6	6	0.38	Caprin-1 OS=Homo sapiens GN=CAPRIN1 PE=1 SV=2
421	1	UniProt_human	P40763	104	88011	7	7	5	5	0.27	Signal transducer and activator of transcription 3 OS=Homo sapiens GN=STAT3 PE=1 SV=2
423	1	UniProt_human	E7EX17	104	69657	3	3	2	2	0.13	Eukaryotic translation initiation factor 4B OS=Homo sapiens GN=EIF4B PE=1 SV=1
424	1	UniProt_human	Q68E01	102	117994	4	4	4	4	0.15	Integrator complex subunit 3 OS=Homo sapiens GN=INTS3 PE=1 SV=1
425	1	UniProt_human	Q8N8Z6	101	77872	6	6	4	4	0.24	Discoidin, CUB and LCCL domain-containing protein 1 OS=Homo sapiens GN=DCBLD1 PE=1 SV=2
426	1	UniProt_human	O95817	101	61557	3	3	3	3	0.23	BAG family molecular chaperone regulator 3 OS=Homo sapiens GN=BAG3 PE=1 SV=3
427	1	UniProt_human	Q14684	101	84375	5	5	4	4	0.22	Ribosomal RNA processing protein 1 homolog B OS=Homo sapiens GN=RRP1B PE=1 SV=3
431	1	UniProt_human	Q99567	100	83489	7	7	6	6	0.36	Nuclear pore complex protein Nup88 OS=Homo sapiens GN=NUP88 PE=1 SV=2
432	1	UniProt_human	P46087	100	89247	5	5	5	5	0.27	Probable 28S rRNA (cytosine(4447)-C(5))-methyltransferase OS=Homo sapiens GN=NOP2 PE=1 SV=2
429	1	UniProt_human	Q96DU7	100	75160	4	4	4	4	0.25	Inositol-trisphosphate 3-kinase C OS=Homo sapiens GN=ITPKC PE=1 SV=1
206	2	UniProt_human	H3BLZ8	100	80389	7	7	4	4	0.24	Probable ATP-dependent RNA helicase DDX17 OS=Homo sapiens GN=DDX17 PE=1 SV=1
430	1	UniProt_human	Q13823	100	83603	2	2	2	2	0.11	Nucleolar GTP-binding protein 2 OS=Homo sapiens GN=GNL2 PE=1 SV=1
428	1	UniProt_human	Q96P70	100	115889	4	4	2	2	0.08	Importin-9 OS=Homo sapiens GN=IPO9 PE=1 SV=3
434	1	UniProt_human	H7BZK4	99	23627	2	2	1	1	0.19	Sodium-dependent phosphate transporter 1 (Fragment) OS=Homo sapiens GN=SLC20A1 PE=1 SV=1
433	1	UniProt_human	G5E9V4	99	94729	3	3	3	3	0.14	Hermansky-Pudlak syndrome 3 protein OS=Homo sapiens GN=HPS3 PE=1 SV=1
436	1	UniProt_human	Q6UN15	98	66487	2	2	2	2	0.14	Pre-mRNA 3'-end-processing factor FIP1 OS=Homo sapiens GN=FIP1L1 PE=1 SV=1
435	1	UniProt_human	Q8N8A6	98	72413	2	2	2	2	0.12	ATP-dependent RNA helicase DDX51 OS=Homo sapiens GN=DDX51 PE=1 SV=3
437	1	UniProt_human	Q99081	97	72920	2	2	2	2	0.12	Transcription factor 12 OS=Homo sapiens GN=TCF12 PE=1 SV=1
439	1	UniProt_human	P04406	96	36030	3	3	3	3	0.42	Glyceraldehyde-3-phosphate dehydrogenase OS=Homo sapiens GN=GAPDH PE=1 SV=3
175	2	UniProt_human	Q96CN4	96	91318	5	5	5	5	0.26	EVI5-like protein OS=Homo sapiens GN=EVI5L PE=1 SV=1
438	1	UniProt_human	V9GYZ6	96	108972	3	3	3	3	0.12	Bifunctional glutamate/proline--tRNA ligase (Fragment) OS=Homo sapiens GN=EPRS PE=1 SV=1
440	1	UniProt_human	P45974	96	95725	3	3	2	2	0.09	Ubiquitin carboxyl-terminal hydrolase 5 OS=Homo sapiens GN=USP5 PE=1 SV=2
441	1	UniProt_human	O75155	96	135171	2	2	2	2	0.06	Cullin-associated NEDD8-dissociated protein 2 OS=Homo sapiens GN=CAND2 PE=1 SV=3
443	1	UniProt_human	Q9NVR0	95	80097	4	4	4	4	0.24	Kelch-like protein 11 OS=Homo sapiens GN=KLHL11 PE=1 SV=1
442	1	UniProt_human	Q96GA3	95	54821	1	1	1	1	0.08	Protein LTV1 homolog OS=Homo sapiens GN=LTV1 PE=1 SV=1
444	1	UniProt_human	Q6ZXV5	94	103942	2	2	2	2	0.09	Transmembrane and TPR repeat-containing protein 3 OS=Homo sapiens GN=TMTC3 PE=1 SV=2
445	1	UniProt_human	A0A0U1RQQ9	93	104046	1	1	1	1	0.04	SCY1-like protein 2 OS=Homo sapiens GN=SCYL2 PE=1 SV=1
450	1	UniProt_human	K7EPL2	92	29367	2	2	2	2	0.33	SUMO-activating enzyme subunit 2 (Fragment) OS=Homo sapiens GN=UBA2 PE=1 SV=2
448	1	UniProt_human	F8WJN3	92	52238	4	4	3	3	0.27	Cleavage and polyadenylation-specificity factor subunit 6 OS=Homo sapiens GN=CPSF6 PE=1 SV=1
447	1	UniProt_human	C9J3F6	92	67491	2	2	2	2	0.13	TBC1 domain family member 5 OS=Homo sapiens GN=TBC1D5 PE=1 SV=1
446	1	UniProt_human	O95674	92	51384	1	1	1	1	0.09	Phosphatidate cytidylyltransferase 2 OS=Homo sapiens GN=CDS2 PE=1 SV=1
449	1	UniProt_human	Q7Z417	92	76075	2	2	1	1	0.06	Nuclear fragile X mental retardation-interacting protein 2 OS=Homo sapiens GN=NUFIP2 PE=1 SV=1
451	1	UniProt_human	Q5SY16	91	79272	4	4	4	4	0.24	Polynucleotide 5'-hydroxyl-kinase NOL9 OS=Homo sapiens GN=NOL9 PE=1 SV=1
452	1	UniProt_human	J3KR97	91	136464	4	4	4	4	0.13	Tubulin-specific chaperone D OS=Homo sapiens GN=TBCD PE=1 SV=1
453	1	UniProt_human	O43164	91	78166	2	2	2	2	0.11	E3 ubiquitin-protein ligase Praja-2 OS=Homo sapiens GN=PJA2 PE=1 SV=4
454	1	UniProt_human	Q14574	90	99906	6	6	4	4	0.19	Desmocollin-3 OS=Homo sapiens GN=DSC3 PE=1 SV=3
456	1	UniProt_human	Q96PE3	90	109885	5	5	4	4	0.17	Type I inositol 3,4-bisphosphate 4-phosphatase OS=Homo sapiens GN=INPP4A PE=1 SV=1
457	1	UniProt_human	G5EA31	90	111914	5	5	4	4	0.16	Protein transport protein Sec24C OS=Homo sapiens GN=SEC24C PE=1 SV=1
455	1	UniProt_human	Q9H7D7	90	72079	3	3	2	2	0.12	WD repeat-containing protein 26 OS=Homo sapiens GN=WDR26 PE=1 SV=3
461	1	UniProt_human	X6RC68	89	11654	1	1	1	1	0.42	Protein zer-1 homolog (Fragment) OS=Homo sapiens GN=ZER1 PE=1 SV=1
460	1	UniProt_human	P12273	89	16562	1	1	1	1	0.29	Prolactin-inducible protein OS=Homo sapiens GN=PIP PE=1 SV=1
463	1	UniProt_human	O14967	89	69994	3	3	3	3	0.2	Calmegin OS=Homo sapiens GN=CLGN PE=1 SV=1
459	1	UniProt_human	G5E9A6	89	104965	5	5	4	4	0.18	Ubiquitin carboxyl-terminal hydrolase 11 OS=Homo sapiens GN=USP11 PE=1 SV=1
464	1	UniProt_human	Q8IWT6	89	94139	3	3	3	3	0.14	Volume-regulated anion channel subunit LRRC8A OS=Homo sapiens GN=LRRC8A PE=1 SV=1
458	1	UniProt_human	P41002	89	87584	2	2	2	2	0.1	Cyclin-F OS=Homo sapiens GN=CCNF PE=1 SV=2
462	1	UniProt_human	F5GYE8	89	107615	1	1	1	1	0.04	Centrosomal protein of 112 kDa OS=Homo sapiens GN=CEP112 PE=1 SV=1
466	1	UniProt_human	Q9BRS2	88	65542	4	4	4	4	0.3	Serine/threonine-protein kinase RIO1 OS=Homo sapiens GN=RIOK1 PE=1 SV=2
465	1	UniProt_human	Q7Z3V4	88	123019	4	4	4	4	0.15	Ubiquitin-protein ligase E3B OS=Homo sapiens GN=UBE3B PE=1 SV=3
467	1	UniProt_human	Q9NXF1	88	105608	3	3	3	3	0.13	Testis-expressed sequence 10 protein OS=Homo sapiens GN=TEX10 PE=1 SV=2
468	1	UniProt_human	A0A087WZT0	88	72369	1	1	1	1	0.06	Protein Smaug homolog 2 OS=Homo sapiens GN=SAMD4B PE=1 SV=1
469	1	UniProt_human	P81605	87	11277	3	3	2	2	1.07	Dermcidin OS=Homo sapiens GN=DCD PE=1 SV=2
471	1	UniProt_human	Q8N1N4	86	56830	4	4	3	3	0.25	Keratin, type II cytoskeletal 78 OS=Homo sapiens GN=KRT78 PE=2 SV=2
472	1	UniProt_human	A0A087WSZ7	86	76975	3	3	3	3	0.18	Phosphodiesterase OS=Homo sapiens GN=PDE4D PE=1 SV=1
470	1	UniProt_human	A0A087WTE7	86	86259	1	1	1	1	0.05	Leukocyte receptor cluster member 8 OS=Homo sapiens GN=LENG8 PE=1 SV=1
475	1	UniProt_human	B7Z964	85	42011	3	3	3	3	0.35	Sarcolemmal membrane-associated protein OS=Homo sapiens GN=SLMAP PE=1 SV=1
473	1	UniProt_human	Q8IX18	85	88504	5	5	5	5	0.27	Probable ATP-dependent RNA helicase DHX40 OS=Homo sapiens GN=DHX40 PE=1 SV=2
474	1	UniProt_human	Q14694	85	87080	4	4	3	3	0.16	Ubiquitin carboxyl-terminal hydrolase 10 OS=Homo sapiens GN=USP10 PE=1 SV=2
476	1	UniProt_human	Q6IA86	85	92441	4	4	3	3	0.15	Elongator complex protein 2 OS=Homo sapiens GN=ELP2 PE=1 SV=2
477	1	UniProt_human	P14923	84	81693	5	5	5	5	0.3	Junction plakoglobin OS=Homo sapiens GN=JUP PE=1 SV=3
478	1	UniProt_human	H0YEH2	84	120152	3	3	2	2	0.07	Pumilio homolog 1 (Fragment) OS=Homo sapiens GN=PUM1 PE=1 SV=1
480	1	UniProt_human	Q8N7H5	83	59939	4	4	4	4	0.33	RNA polymerase II-associated factor 1 homolog OS=Homo sapiens GN=PAF1 PE=1 SV=2
479	1	UniProt_human	Q9BXB4	83	83591	3	3	3	3	0.16	Oxysterol-binding protein-related protein 11 OS=Homo sapiens GN=OSBPL11 PE=1 SV=2
481	1	UniProt_human	P42336	83	124203	3	3	2	2	0.07	Phosphatidylinositol 4,5-bisphosphate 3-kinase catalytic subunit alpha isoform OS=Homo sapiens GN=PIK3CA PE=1 SV=2
482	1	UniProt_human	A0A087X0H9	83	113725	1	1	1	1	0.04	RNA-binding protein 26 OS=Homo sapiens GN=RBM26 PE=1 SV=1
485	1	UniProt_human	O96005	82	76048	4	4	3	3	0.18	Cleft lip and palate transmembrane protein 1 OS=Homo sapiens GN=CLPTM1 PE=1 SV=1
487	1	UniProt_human	A0A087WZB3	82	34989	2	2	1	1	0.13	Proline and serine-rich protein 3 OS=Homo sapiens GN=PROSER3 PE=1 SV=1
486	1	UniProt_human	Q5T6F2	82	117044	5	5	3	3	0.12	Ubiquitin-associated protein 2 OS=Homo sapiens GN=UBAP2 PE=1 SV=1
244	2	UniProt_human	F8WA11	82	162658	2	2	2	2	0.05	CLIP-associating protein 1 OS=Homo sapiens GN=CLASP1 PE=1 SV=2
483	1	UniProt_human	A0A1B0GUZ7	82	96069	1	1	1	1	0.05	Protein EFR3 homolog A OS=Homo sapiens GN=EFR3A PE=4 SV=1
484	1	UniProt_human	Q5T985	82	105150	2	2	1	1	0.04	Inter-alpha-trypsin inhibitor heavy chain H2 OS=Homo sapiens GN=ITIH2 PE=1 SV=1
489	1	UniProt_human	M0QXZ8	81	43379	3	3	3	3	0.34	Rho GTPase-activating protein SYDE1 OS=Homo sapiens GN=SYDE1 PE=1 SV=1
490	1	UniProt_human	Q9H8H0	81	81072	6	6	5	5	0.3	Nucleolar protein 11 OS=Homo sapiens GN=NOL11 PE=1 SV=1
488	1	UniProt_human	A0A0B4J293	81	62544	2	2	2	2	0.15	Uncharacterized protein (Fragment) OS=Homo sapiens PE=4 SV=1
26	2	UniProt_human	J3QQ67	80	21826	2	2	2	2	0.47	60S ribosomal protein L18 (Fragment) OS=Homo sapiens GN=RPL18 PE=1 SV=1
493	1	UniProt_human	Q6P2P2	80	94441	7	7	6	6	0.31	Putative protein arginine N-methyltransferase 9 OS=Homo sapiens GN=PRMT9 PE=2 SV=1
494	1	UniProt_human	O94763	80	59796	3	3	2	2	0.15	Unconventional prefoldin RPB5 interactor 1 OS=Homo sapiens GN=URI1 PE=1 SV=3
491	1	UniProt_human	F5H039	80	84681	3	3	2	2	0.11	Gephyrin OS=Homo sapiens GN=GPHN PE=1 SV=1
492	1	UniProt_human	D6RIY6	80	46948	1	1	1	1	0.09	Exosome complex component RRP45 OS=Homo sapiens GN=EXOSC9 PE=1 SV=1
495	1	UniProt_human	A0A1B0GTU4	80	115832	1	1	1	1	0.04	Paxillin OS=Homo sapiens GN=PXN PE=4 SV=1
497	1	UniProt_human	Q96GX5	79	97257	3	3	3	3	0.14	Serine/threonine-protein kinase greatwall OS=Homo sapiens GN=MASTL PE=1 SV=1
498	1	UniProt_human	Q16659	79	82629	2	2	2	2	0.11	Mitogen-activated protein kinase 6 OS=Homo sapiens GN=MAPK6 PE=1 SV=1
499	1	UniProt_human	Q8WUQ7	79	88648	2	2	2	2	0.1	Cactin OS=Homo sapiens GN=CACTIN PE=1 SV=3
496	1	UniProt_human	Q8N1F8	79	121325	2	2	2	2	0.07	Serine/threonine-protein kinase 11-interacting protein OS=Homo sapiens GN=STK11IP PE=1 SV=3
501	1	UniProt_human	Q8IVL6-2	78	62256	3	3	3	3	0.23	Isoform 2 of Prolyl 3-hydroxylase 3 OS=Homo sapiens GN=P3H3
502	1	UniProt_human	B9TX33	78	41522	2	2	1	1	0.11	Mediator complex subunit MED25 variant MED25_i6 OS=Homo sapiens GN=MED25 PE=1 SV=1
503	1	UniProt_human	D6REX3	78	136141	2	2	2	2	0.06	Protein transport protein Sec31A OS=Homo sapiens GN=SEC31A PE=1 SV=1
505	1	UniProt_human	Q9P0U4	78	75663	1	1	1	1	0.06	CXXC-type zinc finger protein 1 OS=Homo sapiens GN=CXXC1 PE=1 SV=2
504	1	UniProt_human	F1T0I1	78	249328	3	3	3	3	0.05	Protein transport protein Sec16A OS=Homo sapiens GN=SEC16A PE=1 SV=1
500	1	UniProt_human	P56945	78	93314	2	2	1	1	0.05	Breast cancer anti-estrogen resistance protein 1 OS=Homo sapiens GN=BCAR1 PE=1 SV=2
506	1	UniProt_human	Q9C0H5	77	121210	1	1	1	1	0.04	Rho GTPase-activating protein 39 OS=Homo sapiens GN=ARHGAP39 PE=1 SV=2
507	1	UniProt_human	Q9NT22	76	82596	6	6	4	4	0.23	EMILIN-3 OS=Homo sapiens GN=EMILIN3 PE=2 SV=2
508	1	UniProt_human	A0A0A6YYL4	76	114095	4	4	4	4	0.16	Coronin OS=Homo sapiens GN=CORO7-PAM16 PE=3 SV=1
497	2	UniProt_human	J3KRK0	76	68790	2	2	2	2	0.13	Serine/threonine-protein kinase tousled-like 2 (Fragment) OS=Homo sapiens GN=TLK2 PE=1 SV=1
511	1	UniProt_human	P47712	76	85184	4	4	2	2	0.1	Cytosolic phospholipase A2 OS=Homo sapiens GN=PLA2G4A PE=1 SV=2
510	1	UniProt_human	O14920	76	86509	2	2	2	2	0.1	Inhibitor of nuclear factor kappa-B kinase subunit beta OS=Homo sapiens GN=IKBKB PE=1 SV=1
512	1	UniProt_human	Q9UEG4	76	96559	2	2	2	2	0.09	Zinc finger protein 629 OS=Homo sapiens GN=ZNF629 PE=1 SV=2
509	1	UniProt_human	Q86YZ3	76	282228	1	1	1	1	0.02	Hornerin OS=Homo sapiens GN=HRNR PE=1 SV=2
516	1	UniProt_human	B4DGL8	75	77072	4	4	3	3	0.18	ATP-binding cassette sub-family B member 7, mitochondrial (Fragment) OS=Homo sapiens GN=ABCB7 PE=1 SV=1
515	1	UniProt_human	Q96T17	75	81915	2	2	2	2	0.11	MAP7 domain-containing protein 2 OS=Homo sapiens GN=MAP7D2 PE=1 SV=2
514	1	UniProt_human	Q2TAL8	75	86382	2	2	2	2	0.1	Glutamine-rich protein 1 OS=Homo sapiens GN=QRICH1 PE=1 SV=1
513	1	UniProt_human	G3XAC1	75	71490	1	1	1	1	0.06	Solute carrier family 26 member 6 OS=Homo sapiens GN=SLC26A6 PE=1 SV=1
519	1	UniProt_human	E7EPB3	74	14549	1	1	1	1	0.33	60S ribosomal protein L14 OS=Homo sapiens GN=RPL14 PE=1 SV=1
518	1	UniProt_human	H3BT57	74	62873	3	3	3	3	0.22	Protein PML OS=Homo sapiens GN=PML PE=1 SV=1
520	1	UniProt_human	P46977	74	80477	3	3	2	2	0.11	Dolichyl-diphosphooligosaccharide--protein glycosyltransferase subunit STT3A OS=Homo sapiens GN=STT3A PE=1 SV=2
517	1	UniProt_human	Q8TED9	74	86378	2	2	2	2	0.1	Actin filament-associated protein 1-like 1 OS=Homo sapiens GN=AFAP1L1 PE=1 SV=2
521	1	UniProt_human	Q6P2H3	73	85586	4	4	4	4	0.22	Centrosomal protein of 85 kDa OS=Homo sapiens GN=CEP85 PE=1 SV=1
522	1	UniProt_human	E9PKP7	73	87380	2	2	2	2	0.1	Nucleolar transcription factor 1 OS=Homo sapiens GN=UBTF PE=1 SV=1
527	1	UniProt_human	O43719	72	85801	3	3	2	2	0.1	HIV Tat-specific factor 1 OS=Homo sapiens GN=HTATSF1 PE=1 SV=1
525	1	UniProt_human	Q9NZ08	72	107166	2	2	2	2	0.08	Endoplasmic reticulum aminopeptidase 1 OS=Homo sapiens GN=ERAP1 PE=1 SV=3
523	1	UniProt_human	Q7Z5K2	72	132863	2	2	2	2	0.07	Wings apart-like protein homolog OS=Homo sapiens GN=WAPL PE=1 SV=1
524	1	UniProt_human	Q6P2E9	72	151567	3	3	2	2	0.06	Enhancer of mRNA-decapping protein 4 OS=Homo sapiens GN=EDC4 PE=1 SV=1
526	1	UniProt_human	A0A0A0MRP0	72	90076	1	1	1	1	0.05	MAP7 domain-containing protein 3 (Fragment) OS=Homo sapiens GN=MAP7D3 PE=1 SV=1
167	2	UniProt_human	H0YIU0	71	14664	3	3	3	3	1.34	Endoplasmic reticulum mannosyl-oligosaccharide 1,2-alpha-mannosidase (Fragment) OS=Homo sapiens GN=MAN1B1 PE=1 SV=1
528	1	UniProt_human	Q5VSL9	71	95515	1	1	1	1	0.05	Striatin-interacting protein 1 OS=Homo sapiens GN=STRIP1 PE=1 SV=1
530	1	UniProt_human	H0YKL9	70	12056	1	1	1	1	0.41	Annexin (Fragment) OS=Homo sapiens GN=ANXA2 PE=1 SV=1
532	1	UniProt_human	X6RI56	70	13320	1	1	1	1	0.36	CSC1-like protein 1 (Fragment) OS=Homo sapiens GN=TMEM63A PE=1 SV=1
531	1	UniProt_human	Q9HC07	70	34883	2	2	2	2	0.27	Transmembrane protein 165 OS=Homo sapiens GN=TMEM165 PE=1 SV=1
535	1	UniProt_human	D6RAA6	70	25207	1	1	1	1	0.18	Transmembrane protein 33 (Fragment) OS=Homo sapiens GN=TMEM33 PE=1 SV=1
536	1	UniProt_human	K7EJE8	70	93238	3	3	3	3	0.15	Lon protease homolog, mitochondrial OS=Homo sapiens GN=LONP1 PE=1 SV=1
533	1	UniProt_human	F5H4B6	70	67111	2	2	2	2	0.13	Aldehyde dehydrogenase family 16 member A1 OS=Homo sapiens GN=ALDH16A1 PE=1 SV=1
534	1	UniProt_human	Q9NVP1	70	75359	2	2	2	2	0.12	ATP-dependent RNA helicase DDX18 OS=Homo sapiens GN=DDX18 PE=1 SV=2
529	1	UniProt_human	J3QL92	70	55216	1	1	1	1	0.08	Microtubule cross-linking factor 1 OS=Homo sapiens GN=MTCL1 PE=1 SV=1
539	1	UniProt_human	Q9NZ01	69	36011	2	2	2	2	0.26	Very-long-chain enoyl-CoA reductase OS=Homo sapiens GN=TECR PE=1 SV=1
538	1	UniProt_human	J3KPS2	69	96391	3	3	3	3	0.14	Protein FAM83H (Fragment) OS=Homo sapiens GN=FAM83H PE=1 SV=1
537	1	UniProt_human	A0A0A0MRE6	69	98640	3	3	3	3	0.14	WD repeat-containing protein 47 OS=Homo sapiens GN=WDR47 PE=1 SV=1
540	1	UniProt_human	B4DDL8	69	74989	2	2	2	2	0.12	Suppression of tumorigenicity 5 protein OS=Homo sapiens GN=ST5 PE=1 SV=1
541	1	UniProt_human	H0YFK8	69	100298	2	2	2	2	0.09	Glutamate receptor-interacting protein 1 (Fragment) OS=Homo sapiens GN=GRIP1 PE=1 SV=1
542	1	UniProt_human	Q9P253	69	110116	1	1	1	1	0.04	Vacuolar protein sorting-associated protein 18 homolog OS=Homo sapiens GN=VPS18 PE=1 SV=2
546	1	UniProt_human	H3BPE7	68	53465	3	3	3	3	0.27	RNA-binding protein FUS OS=Homo sapiens GN=FUS PE=1 SV=1
543	1	UniProt_human	E9PM19	68	112891	4	4	4	4	0.16	Tyrosine-protein kinase OS=Homo sapiens GN=TYK2 PE=1 SV=1
547	1	UniProt_human	P11279	68	44854	1	1	1	1	0.1	Lysosome-associated membrane glycoprotein 1 OS=Homo sapiens GN=LAMP1 PE=1 SV=3
544	1	UniProt_human	Q9UJA3	68	93638	2	2	2	2	0.09	DNA helicase MCM8 OS=Homo sapiens GN=MCM8 PE=1 SV=2
550	1	UniProt_human	K7EPA3	68	50520	1	1	1	1	0.09	Transmembrane protein 161A OS=Homo sapiens GN=TMEM161A PE=1 SV=2
551	1	UniProt_human	P50443	68	81609	1	1	1	1	0.05	Sulfate transporter OS=Homo sapiens GN=SLC26A2 PE=1 SV=2
545	1	UniProt_human	G0XQ39	68	88591	1	1	1	1	0.05	STIM1L OS=Homo sapiens GN=STIM1 PE=1 SV=1
552	1	UniProt_human	Q6XUX3	68	105139	1	1	1	1	0.04	Dual serine/threonine and tyrosine protein kinase OS=Homo sapiens GN=DSTYK PE=1 SV=2
549	1	UniProt_human	Q6AI08	68	128699	1	1	1	1	0.03	HEAT repeat-containing protein 6 OS=Homo sapiens GN=HEATR6 PE=1 SV=1
555	1	UniProt_human	S4R3E9	67	9666	3	3	1	1	0.53	Protein NEDD8-MDP1 OS=Homo sapiens GN=NEDD8-MDP1 PE=4 SV=1
554	1	UniProt_human	I3L1U9	67	23830	2	2	2	2	0.42	Actin, cytoplasmic 2 (Fragment) OS=Homo sapiens GN=ACTG1 PE=1 SV=1
553	1	UniProt_human	Q5TCS4	67	15891	1	1	1	1	0.3	Polyphosphoinositide phosphatase OS=Homo sapiens GN=FIG4 PE=1 SV=1
548	1	UniProt_human	A0A0D9SEI3	67	89383	3	3	2	2	0.1	Cyclin-dependent kinase 11B OS=Homo sapiens GN=CDK11B PE=1 SV=1
556	1	UniProt_human	P53621	67	138258	3	3	3	3	0.1	Coatomer subunit alpha OS=Homo sapiens GN=COPA PE=1 SV=2
561	1	UniProt_human	Q86YV9	66	82923	3	3	3	3	0.17	Hermansky-Pudlak syndrome 6 protein OS=Homo sapiens GN=HPS6 PE=1 SV=1
560	1	UniProt_human	Q02413	66	113676	3	3	3	3	0.12	Desmoglein-1 OS=Homo sapiens GN=DSG1 PE=1 SV=2
558	1	UniProt_human	Q8NCD3	66	83487	1	1	1	1	0.05	Holliday junction recognition protein OS=Homo sapiens GN=HJURP PE=1 SV=2
559	1	UniProt_human	A0A0R4J2E8	66	94565	1	1	1	1	0.05	Matrin-3 OS=Homo sapiens GN=MATR3 PE=1 SV=1
557	1	UniProt_human	A0A087WY68	66	106560	1	1	1	1	0.04	Proprotein convertase subtilisin/kexin type 6 OS=Homo sapiens GN=PCSK6 PE=1 SV=1
562	1	UniProt_human	H0YIA9	65	17472	1	1	1	1	0.27	Protein asunder homolog (Fragment) OS=Homo sapiens GN=ASUN PE=1 SV=1
564	1	UniProt_human	Q8TD19	65	107100	3	3	3	3	0.13	Serine/threonine-protein kinase Nek9 OS=Homo sapiens GN=NEK9 PE=1 SV=2
565	1	UniProt_human	P30291	65	71553	2	2	2	2	0.13	Wee1-like protein kinase OS=Homo sapiens GN=WEE1 PE=1 SV=2
563	1	UniProt_human	Q9Y6W3	65	92594	1	1	1	1	0.05	Calpain-7 OS=Homo sapiens GN=CAPN7 PE=1 SV=1
568	1	UniProt_human	Q8IWA0	64	94438	2	2	2	2	0.09	WD repeat-containing protein 75 OS=Homo sapiens GN=WDR75 PE=1 SV=1
566	1	UniProt_human	Q86TI2	64	98201	3	3	2	2	0.09	Dipeptidyl peptidase 9 OS=Homo sapiens GN=DPP9 PE=1 SV=3
570	1	UniProt_human	J3KPP4	64	58185	1	1	1	1	0.08	Cisplatin resistance-associated overexpressed protein, isoform CRA_b OS=Homo sapiens GN=LUC7L3 PE=1 SV=1
569	1	UniProt_human	Q6ZWE6	64	87110	1	1	1	1	0.05	Pleckstrin homology domain-containing family M member 3 OS=Homo sapiens GN=PLEKHM3 PE=2 SV=2
567	1	UniProt_human	A0A0A0MR27	64	95765	1	1	1	1	0.05	Coiled-coil domain-containing protein 14 OS=Homo sapiens GN=CCDC14 PE=1 SV=1
574	1	UniProt_human	I3L0Z8	63	31915	3	3	2	2	0.3	Segment polarity protein dishevelled homolog DVL-2 (Fragment) OS=Homo sapiens GN=DVL2 PE=1 SV=1
210	2	UniProt_human	A8MPP7	63	55395	2	2	2	2	0.17	SRSF protein kinase 3 OS=Homo sapiens GN=SRPK3 PE=1 SV=1
571	1	UniProt_human	O75815	63	92507	2	2	2	2	0.1	Breast cancer anti-estrogen resistance protein 3 OS=Homo sapiens GN=BCAR3 PE=1 SV=1
573	1	UniProt_human	O14867	63	81906	1	1	1	1	0.05	Transcription regulator protein BACH1 OS=Homo sapiens GN=BACH1 PE=1 SV=2
572	1	UniProt_human	O43422	63	87648	1	1	1	1	0.05	52 kDa repressor of the inhibitor of the protein kinase OS=Homo sapiens GN=THAP12 PE=1 SV=2
497	3	UniProt_human	P51812	62	83683	4	4	3	3	0.16	Ribosomal protein S6 kinase alpha-3 OS=Homo sapiens GN=RPS6KA3 PE=1 SV=1
578	1	UniProt_human	A0A087X0M4	62	82839	2	2	2	2	0.11	Kanadaptin OS=Homo sapiens GN=SLC4A1AP PE=1 SV=1
577	1	UniProt_human	E9PPJ0	62	98109	2	2	2	2	0.09	Splicing factor 3B subunit 2 OS=Homo sapiens GN=SF3B2 PE=1 SV=1
575	1	UniProt_human	O96018	62	61416	1	1	1	1	0.07	Amyloid beta A4 precursor protein-binding family A member 3 OS=Homo sapiens GN=APBA3 PE=1 SV=1
576	1	UniProt_human	Q86V97	62	76089	1	1	1	1	0.06	Kelch repeat and BTB domain-containing protein 6 OS=Homo sapiens GN=KBTBD6 PE=1 SV=1
582	1	UniProt_human	A6NLH6	61	15760	1	1	1	1	0.3	Protein cornichon homolog 4 OS=Homo sapiens GN=CNIH4 PE=1 SV=1
588	1	UniProt_human	Q13608	61	103996	4	4	4	4	0.18	Peroxisome assembly factor 2 OS=Homo sapiens GN=PEX6 PE=1 SV=2
589	1	UniProt_human	Q96J02	61	102738	3	3	3	3	0.13	E3 ubiquitin-protein ligase Itchy homolog OS=Homo sapiens GN=ITCH PE=1 SV=2
583	1	UniProt_human	P23142	61	77162	3	3	2	2	0.12	Fibulin-1 OS=Homo sapiens GN=FBLN1 PE=1 SV=4
585	1	UniProt_human	A0A075B6Q7	61	93561	2	2	2	2	0.1	Disrupted in schizophrenia 1 protein OS=Homo sapiens GN=DISC1 PE=1 SV=1
581	1	UniProt_human	Q5VWU8	61	109932	2	2	2	2	0.08	Partitioning defective 3 homolog OS=Homo sapiens GN=PARD3 PE=1 SV=1
579	1	UniProt_human	Q14CX7	61	112221	2	2	2	2	0.08	N-alpha-acetyltransferase 25, NatB auxiliary subunit OS=Homo sapiens GN=NAA25 PE=1 SV=1
580	1	UniProt_human	H0Y6Z7	61	174839	3	3	2	2	0.05	Receptor-type tyrosine-protein phosphatase F (Fragment) OS=Homo sapiens GN=PTPRF PE=1 SV=1
587	1	UniProt_human	Q86YT6	61	110066	1	1	1	1	0.04	E3 ubiquitin-protein ligase MIB1 OS=Homo sapiens GN=MIB1 PE=1 SV=1
584	1	UniProt_human	Q5D862	61	247928	2	2	2	2	0.03	Filaggrin-2 OS=Homo sapiens GN=FLG2 PE=1 SV=1
586	1	UniProt_human	A0A0A0MSX9	61	142198	1	1	1	1	0.03	Isoleucine--tRNA ligase, cytoplasmic OS=Homo sapiens GN=IARS PE=1 SV=1
590	1	UniProt_human	H7C1U0	60	34561	2	2	2	2	0.28	Acylamino-acid-releasing enzyme (Fragment) OS=Homo sapiens GN=APEH PE=1 SV=1
594	1	UniProt_human	G3V2H1	60	17176	1	1	1	1	0.27	MAGUK p55 subfamily member 5 (Fragment) OS=Homo sapiens GN=MPP5 PE=1 SV=1
593	1	UniProt_human	R4GMU6	60	29718	1	1	1	1	0.15	Adenomatous polyposis coli protein (Fragment) OS=Homo sapiens GN=APC PE=1 SV=1
591	1	UniProt_human	A0A087WWG1	60	36073	1	1	1	1	0.12	Protein phosphatase Slingshot homolog 3 (Fragment) OS=Homo sapiens GN=SSH3 PE=1 SV=1
595	1	UniProt_human	A0A0B4J1W3	60	101137	2	2	2	2	0.09	N-alpha-acetyltransferase 15, NatA auxiliary subunit OS=Homo sapiens GN=NAA15 PE=1 SV=1
592	1	UniProt_human	A0A0C4DG89	60	117389	2	2	2	2	0.08	Probable ATP-dependent RNA helicase DDX46 OS=Homo sapiens GN=DDX46 PE=1 SV=1
599	1	UniProt_human	H3BV68	59	81528	2	2	2	2	0.11	Esophageal cancer associated protein, isoform CRA_a OS=Homo sapiens GN=C16orf62 PE=1 SV=1
598	1	UniProt_human	P53396	59	120762	2	2	2	2	0.07	ATP-citrate synthase OS=Homo sapiens GN=ACLY PE=1 SV=3
596	1	UniProt_human	C9J2Y9	59	132971	2	2	2	2	0.07	DNA-directed RNA polymerase subunit beta OS=Homo sapiens GN=POLR2B PE=1 SV=2
5	9	UniProt_human	F8W1S1	58	59370	3	3	3	3	0.24	Keratin, type II cytoskeletal 74 OS=Homo sapiens GN=KRT74 PE=1 SV=1
603	1	UniProt_human	Q02539	58	21829	2	2	1	1	0.21	Histone H1.1 OS=Homo sapiens GN=HIST1H1A PE=1 SV=3
606	1	UniProt_human	Q93050	58	96350	3	3	3	3	0.14	V-type proton ATPase 116 kDa subunit a isoform 1 OS=Homo sapiens GN=ATP6V0A1 PE=1 SV=3
601	1	UniProt_human	Q5VZ19	58	40914	3	3	1	1	0.11	Tudor domain-containing protein 10 OS=Homo sapiens GN=TDRD10 PE=2 SV=3
605	1	UniProt_human	Q9Y2L9	58	80824	1	1	1	1	0.05	Leucine-rich repeat and calponin homology domain-containing protein 1 OS=Homo sapiens GN=LRCH1 PE=1 SV=3
600	1	UniProt_human	Q8N653	58	94658	1	1	1	1	0.05	Leucine-zipper-like transcriptional regulator 1 OS=Homo sapiens GN=LZTR1 PE=1 SV=2
602	1	UniProt_human	A0A087WXL6	58	107740	1	1	1	1	0.04	Vacuolar protein sorting 11 (Yeast), isoform CRA_a OS=Homo sapiens GN=VPS11 PE=1 SV=1
604	1	UniProt_human	Q8N122	58	148942	1	1	1	1	0.03	Regulatory-associated protein of mTOR OS=Homo sapiens GN=RPTOR PE=1 SV=1
597	2	UniProt_human	P35030	57	32508	3	3	3	3	0.47	Trypsin-3 OS=Homo sapiens GN=PRSS3 PE=1 SV=2
597	1	UniProt_human	A0A087WW55	57	26605	2	2	2	2	0.37	Trypsin-1 OS=Homo sapiens GN=PRSS1 PE=1 SV=1
607	1	UniProt_human	Q5T8U5	57	21114	1	1	1	1	0.22	Surfeit 4 OS=Homo sapiens GN=SURF4 PE=1 SV=1
608	1	UniProt_human	U3KPX2	57	30630	1	1	1	1	0.15	Nuclear pore complex protein Nup205 (Fragment) OS=Homo sapiens GN=NUP205 PE=1 SV=1
609	1	UniProt_human	A0MZ66	57	71596	2	2	2	2	0.13	Shootin-1 OS=Homo sapiens GN=SHTN1 PE=1 SV=4
610	1	UniProt_human	E9PR71	57	66956	1	1	1	1	0.07	UV radiation resistance-associated gene protein OS=Homo sapiens GN=UVRAG PE=1 SV=1
612	1	UniProt_human	Q6P1M0	57	72018	1	1	1	1	0.06	Long-chain fatty acid transport protein 4 OS=Homo sapiens GN=SLC27A4 PE=1 SV=1
611	1	UniProt_human	Q9HAV4	57	136222	1	1	1	1	0.03	Exportin-5 OS=Homo sapiens GN=XPO5 PE=1 SV=1
613	1	UniProt_human	A0A0U1RQF0	57	273026	1	1	1	1	0.02	Fatty acid synthase OS=Homo sapiens GN=FASN PE=1 SV=1
620	1	UniProt_human	A0A075B6Z2	56	2220	3	3	1	1	4.07	Protein TRAJ56 (Fragment) OS=Homo sapiens GN=TRAJ56 PE=4 SV=1
618	1	UniProt_human	Q96HY7	56	103011	4	4	4	4	0.18	Probable 2-oxoglutarate dehydrogenase E1 component DHKTD1, mitochondrial OS=Homo sapiens GN=DHTKD1 PE=1 SV=2
615	1	UniProt_human	B4E321	56	46273	1	1	1	1	0.1	Protein OS-9 OS=Homo sapiens GN=OS9 PE=1 SV=1
616	1	UniProt_human	K7EJ08	56	51346	1	1	1	1	0.09	SEC14-like protein 1 (Fragment) OS=Homo sapiens GN=SEC14L1 PE=1 SV=1
617	1	UniProt_human	P48651	56	55491	1	1	1	1	0.08	Phosphatidylserine synthase 1 OS=Homo sapiens GN=PTDSS1 PE=1 SV=1
621	1	UniProt_human	Q9UH99	56	80262	1	1	1	1	0.05	SUN domain-containing protein 2 OS=Homo sapiens GN=SUN2 PE=1 SV=3
619	1	UniProt_human	A0A024RAC6	56	87176	1	1	1	1	0.05	Transcription elongation factor B (SIII), polypeptide 3 (110kDa, elongin A), isoform CRA_a OS=Homo sapiens GN=TCEB3 PE=1 SV=1
625	1	UniProt_human	B4DR61	55	52915	2	2	2	2	0.17	Protein transport protein Sec61 subunit alpha isoform 1 OS=Homo sapiens GN=SEC61A1 PE=1 SV=1
623	1	UniProt_human	E7ER27	55	53894	1	1	1	1	0.08	Peroxisomal multifunctional enzyme type 2 OS=Homo sapiens GN=HSD17B4 PE=1 SV=3
614	1	UniProt_human	A0A087WWK8	55	124399	2	2	2	2	0.07	IQ motif and SEC7 domain-containing protein 1 OS=Homo sapiens GN=IQSEC1 PE=1 SV=1
628	1	UniProt_human	D3DQ30	55	63140	1	1	1	1	0.07	HCG40295, isoform CRA_d OS=Homo sapiens GN=TTC39A PE=1 SV=1
626	1	UniProt_human	G3V3B0	55	67454	1	1	1	1	0.06	Apoptotic chromatin condensation inducer in the nucleus OS=Homo sapiens GN=ACIN1 PE=1 SV=1
622	1	UniProt_human	A0A0A0MTI2	55	72242	1	1	1	1	0.06	Adaptor protein with pleckstrin homology and src homology 2 domains, isoform CRA_a OS=Homo sapiens GN=SH2B2 PE=1 SV=1
624	1	UniProt_human	E7EW05	55	75393	1	1	1	1	0.06	Protein SDA1 homolog OS=Homo sapiens GN=SDAD1 PE=1 SV=1
627	1	UniProt_human	Q5SZL2	55	91751	1	1	1	1	0.05	Centrosomal protein of 85 kDa-like OS=Homo sapiens GN=CEP85L PE=1 SV=1
633	1	UniProt_human	A0A0D9SEI8	54	10532	1	1	1	1	0.48	Y-box-binding protein 3 (Fragment) OS=Homo sapiens GN=YBX3 PE=1 SV=1
632	1	UniProt_human	P50747	54	80709	4	4	4	4	0.23	Biotin--protein ligase OS=Homo sapiens GN=HLCS PE=1 SV=1
629	1	UniProt_human	H3BMJ8	54	23470	1	1	1	1	0.2	Transcription factor 25 (Fragment) OS=Homo sapiens GN=TCF25 PE=1 SV=1
630	1	UniProt_human	A0A0C4DGU9	54	46286	1	1	1	1	0.1	Alpha-mannosidase 2C1 OS=Homo sapiens GN=MAN2C1 PE=1 SV=1
631	1	UniProt_human	A0A087X298	54	54122	1	1	1	1	0.08	Protein tilB homolog OS=Homo sapiens GN=LRRC6 PE=1 SV=1
634	1	UniProt_human	A0A087X1Z1	54	118516	1	1	1	1	0.04	Gamma-tubulin complex component OS=Homo sapiens GN=TUBGCP5 PE=1 SV=1
636	1	UniProt_human	E7ESH4	53	25210	1	1	1	1	0.18	60 kDa heat shock protein, mitochondrial (Fragment) OS=Homo sapiens GN=HSPD1 PE=1 SV=1
637	1	UniProt_human	P11387	53	90669	3	3	3	3	0.15	DNA topoisomerase 1 OS=Homo sapiens GN=TOP1 PE=1 SV=2
635	1	UniProt_human	P30825	53	67594	3	3	2	2	0.13	High affinity cationic amino acid transporter 1 OS=Homo sapiens GN=SLC7A1 PE=1 SV=1
236	2	UniProt_human	A0A1B0GTN1	53	95743	2	2	2	2	0.09	Putative SMEK homolog 3 OS=Homo sapiens GN=PPP4R3CP PE=4 SV=1
639	1	UniProt_human	P33176	53	109617	2	2	2	2	0.08	Kinesin-1 heavy chain OS=Homo sapiens GN=KIF5B PE=1 SV=1
638	1	UniProt_human	Q14689	53	170261	1	1	1	1	0.03	Disco-interacting protein 2 homolog A OS=Homo sapiens GN=DIP2A PE=1 SV=2
640	1	UniProt_human	M0QZB4	52	20924	2	2	2	2	0.49	DNA polymerase delta catalytic subunit (Fragment) OS=Homo sapiens GN=POLD1 PE=1 SV=1
643	1	UniProt_human	K7EJH7	52	19070	1	1	1	1	0.24	Breast carcinoma-amplified sequence 3 (Fragment) OS=Homo sapiens GN=BCAS3 PE=1 SV=1
646	1	UniProt_human	A0A1B0GV57	52	45503	2	2	2	2	0.2	TGF-beta-activated kinase 1 and MAP3K7-binding protein 2 OS=Homo sapiens GN=TAB2 PE=4 SV=1
647	1	UniProt_human	F6U0H7	52	27803	1	1	1	1	0.16	HLA class I histocompatibility antigen, B-46 alpha chain (Fragment) OS=Homo sapiens GN=HLA-B PE=1 SV=1
642	1	UniProt_human	A0A087WU53	52	41504	1	1	1	1	0.11	Magnesium transporter protein 1 OS=Homo sapiens GN=MAGT1 PE=1 SV=1
641	1	UniProt_human	Q8WUM0	52	128898	4	4	3	3	0.1	Nuclear pore complex protein Nup133 OS=Homo sapiens GN=NUP133 PE=1 SV=2
407	2	UniProt_human	Q9H9G7	52	97298	2	2	2	2	0.09	Protein argonaute-3 OS=Homo sapiens GN=AGO3 PE=1 SV=2
645	1	UniProt_human	F8VX04	52	56158	1	1	1	1	0.08	Sodium-coupled neutral amino acid transporter 1 OS=Homo sapiens GN=SLC38A1 PE=1 SV=1
644	1	UniProt_human	Q9UJX6	52	93769	1	1	1	1	0.05	Anaphase-promoting complex subunit 2 OS=Homo sapiens GN=ANAPC2 PE=1 SV=1
648	1	UniProt_human	Q9P0V3	52	107428	1	1	1	1	0.04	SH3 domain-binding protein 4 OS=Homo sapiens GN=SH3BP4 PE=1 SV=1
653	1	UniProt_human	Q96JK2	51	103899	3	3	3	3	0.13	DDB1- and CUL4-associated factor 5 OS=Homo sapiens GN=DCAF5 PE=1 SV=2
654	1	UniProt_human	Q9Y5K3	51	41914	1	1	1	1	0.11	Choline-phosphate cytidylyltransferase B OS=Homo sapiens GN=PCYT1B PE=1 SV=1
657	1	UniProt_human	A0A0D9SEM4	51	43622	1	1	1	1	0.1	Serine/arginine-rich-splicing factor 4 (Fragment) OS=Homo sapiens GN=SRSF4 PE=1 SV=1
407	3	UniProt_human	Q5TA58	51	88822	2	2	2	2	0.1	Protein argonaute-1 OS=Homo sapiens GN=AGO1 PE=1 SV=1
656	1	UniProt_human	E7EVJ5	51	142485	3	3	3	3	0.09	Cytoplasmic FMR1-interacting protein 2 OS=Homo sapiens GN=CYFIP2 PE=1 SV=1
660	1	UniProt_human	H7C3M7	51	51562	1	1	1	1	0.09	FERM, RhoGEF and pleckstrin domain-containing protein 2 (Fragment) OS=Homo sapiens GN=FARP2 PE=1 SV=2
659	1	UniProt_human	F6SS63	51	66988	1	1	1	1	0.07	TAK1-binding protein 3, isoform CRA_c OS=Homo sapiens GN=TAB3 PE=1 SV=2
658	1	UniProt_human	Q7L0J3	51	82642	1	1	1	1	0.05	Synaptic vesicle glycoprotein 2A OS=Homo sapiens GN=SV2A PE=1 SV=1
650	1	UniProt_human	Q15459	51	88831	1	1	1	1	0.05	Splicing factor 3A subunit 1 OS=Homo sapiens GN=SF3A1 PE=1 SV=1
652	1	UniProt_human	A0A087WTF0	51	90202	1	1	1	1	0.05	Protein tyrosine phosphatase domain-containing protein 1 OS=Homo sapiens GN=PTPDC1 PE=1 SV=1
661	1	UniProt_human	Q92830	51	93866	1	1	1	1	0.05	Histone acetyltransferase KAT2A OS=Homo sapiens GN=KAT2A PE=1 SV=3
662	1	UniProt_human	Q9NTZ6	51	97333	1	1	1	1	0.04	RNA-binding protein 12 OS=Homo sapiens GN=RBM12 PE=1 SV=1
649	1	UniProt_human	E9PG71	51	105648	1	1	1	1	0.04	Ephrin type-A receptor 4 OS=Homo sapiens GN=EPHA4 PE=1 SV=1
651	1	UniProt_human	H0Y472	51	112892	1	1	1	1	0.04	Ankyrin repeat and KH domain-containing protein 1 (Fragment) OS=Homo sapiens GN=ANKHD1 PE=1 SV=1
276	2	UniProt_human	Q02809	50	83497	3	3	3	3	0.16	Procollagen-lysine,2-oxoglutarate 5-dioxygenase 1 OS=Homo sapiens GN=PLOD1 PE=1 SV=2
670	1	UniProt_human	Q8WXE1	50	85783	2	2	2	2	0.1	ATR-interacting protein OS=Homo sapiens GN=ATRIP PE=1 SV=1
665	1	UniProt_human	Q68CQ4	50	87001	2	2	2	2	0.1	Digestive organ expansion factor homolog OS=Homo sapiens GN=DIEXF PE=1 SV=2
666	1	UniProt_human	Q13123	50	65562	1	1	1	1	0.07	Protein Red OS=Homo sapiens GN=IK PE=1 SV=3
668	1	UniProt_human	Q8IXK2	50	66896	1	1	1	1	0.07	Polypeptide N-acetylgalactosaminyltransferase 12 OS=Homo sapiens GN=GALNT12 PE=1 SV=3
664	1	UniProt_human	Q9UJS0	50	74129	1	1	1	1	0.06	Calcium-binding mitochondrial carrier protein Aralar2 OS=Homo sapiens GN=SLC25A13 PE=1 SV=2
667	1	UniProt_human	Q9P1Z2	50	77289	1	1	1	1	0.06	Calcium-binding and coiled-coil domain-containing protein 1 OS=Homo sapiens GN=CALCOCO1 PE=1 SV=2
669	1	UniProt_human	Q8TEL6	50	90794	1	1	1	1	0.05	Short transient receptor potential channel 4-associated protein OS=Homo sapiens GN=TRPC4AP PE=1 SV=2
663	1	UniProt_human	Q8WUH2	50	97096	1	1	1	1	0.04	Transforming growth factor-beta receptor-associated protein 1 OS=Homo sapiens GN=TGFBRAP1 PE=1 SV=1
671	1	UniProt_human	P0CG13	49	13305	1	1	1	1	0.36	Chromosome transmission fidelity protein 8 homolog OS=Homo sapiens GN=CHTF8 PE=1 SV=1
677	1	UniProt_human	A0A0A0MQX4	49	29397	2	2	2	2	0.33	N-terminal kinase-like protein OS=Homo sapiens GN=SCYL1 PE=1 SV=1
673	1	UniProt_human	H0Y9Y8	49	24282	1	1	1	1	0.19	RUN and FYVE domain-containing protein 1 (Fragment) OS=Homo sapiens GN=RUFY1 PE=1 SV=8
674	1	UniProt_human	P11166	49	54049	1	1	1	1	0.08	Solute carrier family 2, facilitated glucose transporter member 1 OS=Homo sapiens GN=SLC2A1 PE=1 SV=2
672	1	UniProt_human	H0Y3K4	49	100294	1	1	1	1	0.04	RNA-binding protein 33 (Fragment) OS=Homo sapiens GN=RBM33 PE=1 SV=1
676	1	UniProt_human	Q9H0K1	49	103849	1	1	1	1	0.04	Serine/threonine-protein kinase SIK2 OS=Homo sapiens GN=SIK2 PE=1 SV=1
678	1	UniProt_human	Q8IZF5	49	116266	1	1	1	1	0.04	Adhesion G-protein coupled receptor F3 OS=Homo sapiens GN=ADGRF3 PE=2 SV=1
675	1	UniProt_human	P11274	49	142730	1	1	1	1	0.03	Breakpoint cluster region protein OS=Homo sapiens GN=BCR PE=1 SV=2
684	1	UniProt_human	H3BPG8	48	18250	2	2	2	2	0.58	Exportin-6 (Fragment) OS=Homo sapiens GN=XPO6 PE=1 SV=1
685	1	UniProt_human	C9JK03	48	20699	1	1	1	1	0.22	Circadian locomoter output cycles protein kaput (Fragment) OS=Homo sapiens GN=CLOCK PE=1 SV=1
680	1	UniProt_human	Q8WTT2	48	92490	3	3	2	2	0.1	Nucleolar complex protein 3 homolog OS=Homo sapiens GN=NOC3L PE=1 SV=1
683	1	UniProt_human	P01008	48	52569	1	1	1	1	0.08	Antithrombin-III OS=Homo sapiens GN=SERPINC1 PE=1 SV=1
681	1	UniProt_human	O14545	48	64800	1	1	1	1	0.07	TRAF-type zinc finger domain-containing protein 1 OS=Homo sapiens GN=TRAFD1 PE=1 SV=1
679	1	UniProt_human	Q7L7V1	48	84364	1	1	1	1	0.05	Putative pre-mRNA-splicing factor ATP-dependent RNA helicase DHX32 OS=Homo sapiens GN=DHX32 PE=1 SV=1
682	1	UniProt_human	H7BXY3	48	130469	1	1	1	1	0.03	Putative ATP-dependent RNA helicase DHX30 OS=Homo sapiens GN=DHX30 PE=1 SV=1
686	1	UniProt_human	Q9ULL1	48	155343	1	1	1	1	0.03	Pleckstrin homology domain-containing family G member 1 OS=Homo sapiens GN=PLEKHG1 PE=1 SV=2
691	1	UniProt_human	C9J0L6	47	11776	1	1	1	1	0.42	Protein ECT2 (Fragment) OS=Homo sapiens GN=ECT2 PE=1 SV=1
687	1	UniProt_human	A0A0C4DGS9	47	31273	3	3	1	1	0.14	Choline/ethanolaminephosphotransferase 1 OS=Homo sapiens GN=CEPT1 PE=1 SV=1
693	1	UniProt_human	H7C2G2	47	31491	1	1	1	1	0.14	NAD(P)(+)--arginine ADP-ribosyltransferase (Fragment) OS=Homo sapiens GN=ART4 PE=1 SV=1
694	1	UniProt_human	A0A096LPI3	47	42142	1	1	1	1	0.11	Putative bifunctional UDP-N-acetylglucosamine transferase and deubiquitinase ALG13 (Fragment) OS=Homo sapiens GN=ALG13 PE=1 SV=1
692	1	UniProt_human	A0A0A6YYJ8	47	54191	1	1	1	1	0.08	Putative RNA-binding protein Luc7-like 2 OS=Homo sapiens GN=LUC7L2 PE=4 SV=1
688	1	UniProt_human	A0A0A0MRZ4	47	70031	1	1	1	1	0.06	TNFAIP3-interacting protein 1 OS=Homo sapiens GN=TNIP1 PE=1 SV=1
690	1	UniProt_human	Q92994	47	73794	1	1	1	1	0.06	Transcription factor IIIB 90 kDa subunit OS=Homo sapiens GN=BRF1 PE=1 SV=1
695	1	UniProt_human	J3QK89	47	104868	1	1	1	1	0.04	Calcium homeostasis endoplasmic reticulum protein OS=Homo sapiens GN=CHERP PE=1 SV=1
689	1	UniProt_human	Q9Y4B6	47	168900	1	1	1	1	0.03	Protein VPRBP OS=Homo sapiens GN=VPRBP PE=1 SV=3
699	1	UniProt_human	H0Y9D9	46	18633	1	1	1	1	0.25	Cytoplasmic polyadenylation element-binding protein 2 (Fragment) OS=Homo sapiens GN=CPEB2 PE=1 SV=1
698	1	UniProt_human	Q9UBM7	46	54454	2	2	1	1	0.08	7-dehydrocholesterol reductase OS=Homo sapiens GN=DHCR7 PE=1 SV=1
697	1	UniProt_human	I3L428	46	61467	1	1	1	1	0.07	SET and MYND domain-containing protein 4 (Fragment) OS=Homo sapiens GN=SMYD4 PE=1 SV=1
696	1	UniProt_human	Q9BRK4	46	72715	1	1	1	1	0.06	Leucine zipper putative tumor suppressor 2 OS=Homo sapiens GN=LZTS2 PE=1 SV=2
707	1	UniProt_human	Q5TB21	45	15842	1	1	1	1	0.3	Anterior pharynx defective 1 homolog A (C. elegans) (Fragment) OS=Homo sapiens GN=APH1A PE=1 SV=1
706	1	UniProt_human	V9GYF5	45	19788	1	1	1	1	0.24	Rho guanine nucleotide exchange factor 2 (Fragment) OS=Homo sapiens GN=ARHGEF2 PE=1 SV=1
655	1	UniProt_human	Q96II8	45	86030	2	2	2	2	0.1	Leucine-rich repeat and calponin homology domain-containing protein 3 OS=Homo sapiens GN=LRCH3 PE=1 SV=2
705	1	UniProt_human	U3KPU7	45	46413	1	1	1	1	0.1	Glucose-6-phosphate exchanger SLC37A4 OS=Homo sapiens GN=SLC37A4 PE=1 SV=2
703	1	UniProt_human	O00203	45	121244	2	2	2	2	0.07	AP-3 complex subunit beta-1 OS=Homo sapiens GN=AP3B1 PE=1 SV=3
704	1	UniProt_human	Q9UBU7	45	76810	1	1	1	1	0.06	Protein DBF4 homolog A OS=Homo sapiens GN=DBF4 PE=1 SV=1
702	1	UniProt_human	A0A087X0X3	45	77518	1	1	1	1	0.06	Heterogeneous nuclear ribonucleoprotein M OS=Homo sapiens GN=HNRNPM PE=1 SV=1
701	1	UniProt_human	Q9UKW4	45	97713	1	1	1	1	0.04	Guanine nucleotide exchange factor VAV3 OS=Homo sapiens GN=VAV3 PE=1 SV=1
700	1	UniProt_human	Q15276	45	99229	1	1	1	1	0.04	Rab GTPase-binding effector protein 1 OS=Homo sapiens GN=RABEP1 PE=1 SV=2
708	1	UniProt_human	P20930	45	434922	1	1	1	1	0.01	Filaggrin OS=Homo sapiens GN=FLG PE=1 SV=3
711	1	UniProt_human	M0QXQ9	44	19693	1	1	1	1	0.24	Microtubule-associated protein 1S (Fragment) OS=Homo sapiens GN=MAP1S PE=1 SV=8
715	1	UniProt_human	H7C036	44	21921	1	1	1	1	0.21	DIS3-like exonuclease 2 (Fragment) OS=Homo sapiens GN=DIS3L2 PE=1 SV=1
712	1	UniProt_human	Q5M9Q1	44	46284	1	1	1	1	0.1	NKAP-like protein OS=Homo sapiens GN=NKAPL PE=2 SV=3
709	1	UniProt_human	A0A087X1X7	44	69240	1	1	1	1	0.06	Elongation factor 1-delta OS=Homo sapiens GN=EEF1D PE=1 SV=1
713	1	UniProt_human	A4D1P6	44	83292	1	1	1	1	0.05	WD repeat-containing protein 91 OS=Homo sapiens GN=WDR91 PE=1 SV=2
714	1	UniProt_human	H3BUF6	44	112644	1	1	1	1	0.04	Ataxin-2-like protein OS=Homo sapiens GN=ATXN2L PE=1 SV=1
710	1	UniProt_human	E7ET15	44	118175	1	1	1	1	0.04	U2 snRNP-associated SURP motif-containing protein OS=Homo sapiens GN=U2SURP PE=1 SV=1
717	1	UniProt_human	D6RA73	43	6805	1	1	1	1	0.81	Stress-70 protein, mitochondrial (Fragment) OS=Homo sapiens GN=HSPA9 PE=1 SV=1
718	1	UniProt_human	M0QYC7	43	10554	1	1	1	1	0.48	RNA polymerase II-associated factor 1 homolog (Fragment) OS=Homo sapiens GN=PAF1 PE=1 SV=1
716	1	UniProt_human	P05089	43	34713	1	1	1	1	0.13	Arginase-1 OS=Homo sapiens GN=ARG1 PE=1 SV=2
721	1	UniProt_human	Q9Y2W2	43	69954	1	1	1	1	0.06	WW domain-binding protein 11 OS=Homo sapiens GN=WBP11 PE=1 SV=1
719	1	UniProt_human	P82094	43	122767	1	1	1	1	0.04	TATA element modulatory factor OS=Homo sapiens GN=TMF1 PE=1 SV=2
720	1	UniProt_human	Q9UQ35	43	299438	2	2	2	2	0.03	Serine/arginine repetitive matrix protein 2 OS=Homo sapiens GN=SRRM2 PE=1 SV=2
726	1	UniProt_human	D6RAP6	42	18315	2	2	1	1	0.26	Anaphase-promoting complex subunit 4 (Fragment) OS=Homo sapiens GN=ANAPC4 PE=1 SV=1
728	1	UniProt_human	Q5T085	42	25554	1	1	1	1	0.18	Alpha-amylase 1 (Fragment) OS=Homo sapiens GN=AMY1B PE=1 SV=1
725	1	UniProt_human	Q5JR89	42	32428	1	1	1	1	0.14	Kinesin-like protein KIF2C (Fragment) OS=Homo sapiens GN=KIF2C PE=1 SV=1
724	1	UniProt_human	Q5W0V3	42	86503	2	2	2	2	0.1	Protein FAM160B1 OS=Homo sapiens GN=FAM160B1 PE=1 SV=1
722	1	UniProt_human	A0A087WZD8	42	63834	1	1	1	1	0.07	General transcription factor 3C polypeptide 2 OS=Homo sapiens GN=GTF3C2 PE=1 SV=1
729	1	UniProt_human	P22059	42	89365	1	1	1	1	0.05	Oxysterol-binding protein 1 OS=Homo sapiens GN=OSBP PE=1 SV=1
723	1	UniProt_human	Q13444	42	92899	1	1	1	1	0.05	Disintegrin and metalloproteinase domain-containing protein 15 OS=Homo sapiens GN=ADAM15 PE=1 SV=4
727	1	UniProt_human	A0A087WVP4	42	104782	1	1	1	1	0.04	Smoothelin OS=Homo sapiens GN=SMTN PE=1 SV=1
734	1	UniProt_human	Q5VW52	41	80089	3	3	3	3	0.17	Glycerol-3-phosphate acyltransferase 1, mitochondrial OS=Homo sapiens GN=GPAM PE=1 SV=1
738	1	UniProt_human	A0A075B6F6	41	30143	1	1	1	1	0.15	Minor histocompatibility antigen H13 (Fragment) OS=Homo sapiens GN=HM13 PE=1 SV=1
732	1	UniProt_human	H0Y2V1	41	48617	1	1	1	1	0.09	Microtubule-associated protein (Fragment) OS=Homo sapiens GN=MAP4 PE=1 SV=1
730	1	UniProt_human	E9PBY7	41	57392	1	1	1	1	0.08	Zinc finger CCCH domain-containing protein 11A (Fragment) OS=Homo sapiens GN=ZC3H11A PE=1 SV=1
737	1	UniProt_human	Q01167	41	69020	1	1	1	1	0.06	Forkhead box protein K2 OS=Homo sapiens GN=FOXK2 PE=1 SV=3
736	1	UniProt_human	Q96SU4	41	83132	1	1	1	1	0.05	Oxysterol-binding protein-related protein 9 OS=Homo sapiens GN=OSBPL9 PE=1 SV=2
735	1	UniProt_human	Q92900	41	124267	1	1	1	1	0.03	Regulator of nonsense transcripts 1 OS=Homo sapiens GN=UPF1 PE=1 SV=2
731	1	UniProt_human	Q14152	41	166468	1	1	1	1	0.03	Eukaryotic translation initiation factor 3 subunit A OS=Homo sapiens GN=EIF3A PE=1 SV=1
733	1	UniProt_human	Q8NG31	41	265224	1	1	1	1	0.02	Protein CASC5 OS=Homo sapiens GN=CASC5 PE=1 SV=3
743	1	UniProt_human	Q5TB53	40	29862	1	1	1	1	0.15	Transmembrane 9 superfamily member (Fragment) OS=Homo sapiens GN=TM9SF3 PE=1 SV=8
740	1	UniProt_human	Q5JTW2	40	76348	2	2	2	2	0.12	Centrosomal protein of 78 kDa OS=Homo sapiens GN=CEP78 PE=1 SV=1
742	1	UniProt_human	E9PC44	40	43912	1	1	1	1	0.1	Protein transport protein Sec24D OS=Homo sapiens GN=SEC24D PE=1 SV=2
741	1	UniProt_human	B1ANE3	40	91722	1	1	1	1	0.05	Methionine synthase (Fragment) OS=Homo sapiens GN=MTR PE=1 SV=1
739	1	UniProt_human	A0A0A6YY96	40	104992	1	1	1	1	0.04	Iron-responsive element-binding protein 2 OS=Homo sapiens GN=IREB2 PE=1 SV=1
746	1	UniProt_human	J3KRD0	39	28420	1	1	1	1	0.16	Archaemetzincin-2 (Fragment) OS=Homo sapiens GN=AMZ2 PE=1 SV=1
747	1	UniProt_human	Q9H0W5	39	59339	1	1	1	1	0.07	Coiled-coil domain-containing protein 8 OS=Homo sapiens GN=CCDC8 PE=1 SV=2
744	1	UniProt_human	J3KQ96	39	144040	1	1	1	1	0.03	Treacle protein (Fragment) OS=Homo sapiens GN=TCOF1 PE=1 SV=1
745	1	UniProt_human	F8W9S7	39	157365	1	1	1	1	0.03	GTPase-activating protein and VPS9 domain-containing protein 1 OS=Homo sapiens GN=GAPVD1 PE=1 SV=1
748	1	UniProt_human	Q96P63	38	46247	1	1	1	1	0.1	Serpin B12 OS=Homo sapiens GN=SERPINB12 PE=1 SV=1
750	1	UniProt_human	A0A087WWP4	38	102073	1	1	1	1	0.04	Putative RNA-binding protein 15 OS=Homo sapiens GN=RBM15 PE=1 SV=1
749	1	UniProt_human	P49916	38	112835	1	1	1	1	0.04	DNA ligase 3 OS=Homo sapiens GN=LIG3 PE=1 SV=2
752	1	UniProt_human	I3L328	37	12433	2	2	2	2	0.94	Cell division cycle protein 27 homolog (Fragment) OS=Homo sapiens GN=CDC27 PE=1 SV=1
755	1	UniProt_human	A0A599	37	12557	1	1	1	1	0.39	Protein TRBV5-6 (Fragment) OS=Homo sapiens GN=TCRBV5S2 PE=4 SV=1
753	1	UniProt_human	Q8TAI1	37	13393	1	1	1	1	0.36	TYMS opposite strand protein OS=Homo sapiens GN=TYMSOS PE=5 SV=2
757	1	UniProt_human	C9JAB0	37	15202	1	1	1	1	0.31	DCC-interacting protein 13-alpha (Fragment) OS=Homo sapiens GN=APPL1 PE=1 SV=8
758	1	UniProt_human	Q5T8U2	37	16529	1	1	1	1	0.29	60S ribosomal protein L7a OS=Homo sapiens GN=RPL7A PE=1 SV=1
756	1	UniProt_human	H7C1W4	37	74424	1	1	1	1	0.06	Uncharacterized protein (Fragment) OS=Homo sapiens PE=4 SV=1
751	1	UniProt_human	H3BLT0	37	80957	1	1	1	1	0.05	Receptor tyrosine-protein kinase erbB-4 (Fragment) OS=Homo sapiens GN=ERBB4 PE=1 SV=1
754	1	UniProt_human	Q9UNY4	37	129508	1	1	1	1	0.03	Transcription termination factor 2 OS=Homo sapiens GN=TTF2 PE=1 SV=2
762	1	UniProt_human	A0A087X2D0	36	10314	1	1	1	1	0.49	Serine/arginine-rich-splicing factor 3 OS=Homo sapiens GN=SRSF3 PE=1 SV=1
760	1	UniProt_human	B5MCW2	36	31224	1	1	1	1	0.14	60S ribosomal protein L3 (Fragment) OS=Homo sapiens GN=RPL3 PE=1 SV=1
761	1	UniProt_human	H7C213	36	33549	1	1	1	1	0.13	Translation initiation factor IF-2, mitochondrial (Fragment) OS=Homo sapiens GN=MTIF2 PE=1 SV=2
759	1	UniProt_human	H0YAM8	36	89790	1	1	1	1	0.05	E3 ubiquitin-protein ligase MIB2 (Fragment) OS=Homo sapiens GN=MIB2 PE=1 SV=1
763	1	UniProt_human	E9PCX7	35	99665	1	1	1	1	0.04	NAD(P) transhydrogenase, mitochondrial OS=Homo sapiens GN=NNT PE=1 SV=1
764	1	UniProt_human	Q96PE2	35	221535	1	1	1	1	0.02	Rho guanine nucleotide exchange factor 17 OS=Homo sapiens GN=ARHGEF17 PE=1 SV=1
766	1	UniProt_human	B4DWT1	34	13127	1	1	1	1	0.37	Serine/arginine-rich-splicing factor 11 OS=Homo sapiens GN=SRSF11 PE=1 SV=1
765	1	UniProt_human	H3BR35	34	52910	1	1	1	1	0.08	Eukaryotic peptide chain release factor GTP-binding subunit ERF3A (Fragment) OS=Homo sapiens GN=GSPT1 PE=1 SV=1
768	1	UniProt_human	S4R3D7	33	24122	1	1	1	1	0.19	Calcium uptake protein 1, mitochondrial (Fragment) OS=Homo sapiens GN=MICU1 PE=1 SV=1
767	1	UniProt_human	O43815	33	86079	1	1	1	1	0.05	Striatin OS=Homo sapiens GN=STRN PE=1 SV=4
769	1	UniProt_human	P22670	33	104693	1	1	1	1	0.04	MHC class II regulatory factor RFX1 OS=Homo sapiens GN=RFX1 PE=1 SV=2
770	1	UniProt_human	A0A1B0GV93	32	30342	1	1	1	1	0.15	Very-long-chain 3-oxoacyl-CoA reductase OS=Homo sapiens GN=HSD17B12 PE=4 SV=1
771	1	UniProt_human	Q7Z3U7	32	190237	1	1	1	1	0.02	Protein MON2 homolog OS=Homo sapiens GN=MON2 PE=1 SV=3
772	1	UniProt_human	O43290	30	90200	1	1	1	1	0.05	U4/U6.U5 tri-snRNP-associated protein 1 OS=Homo sapiens GN=SART1 PE=1 SV=1
773	1	UniProt_human	A0A0C4DGK5	27	36219	1	1	1	1	0.12	Tetratricopeptide repeat protein 7B (Fragment) OS=Homo sapiens GN=TTC7B PE=1 SV=1
Not what you expected? Try the select summary.
Mascot: http://www.matrixscience.com/
