# Supplementary material for: FER-mediated phosphorylation and PIK3R2 recruitment on IRS4 promotes AKT activation and tumorigenesis in ovarian cancer cells
Source: eLife. 2022 May 12;11:e76183. doi: 10.7554/eLife.76183 (PMC9098222; doi:10.7554/eLife.76183)
Supplement: Supplementary file 5. — Potential FER interactome between 100– and 150 kDa is shown in this file. [file elife-76183-supp5.xlsx]

## Sheet: All Proteins
File Name: 100-150
↑Family	M	DB	Accession	Score	Mass	Matches	Match(sig)	Sequences	Seq(sig)	emPAI	Description
1	1	UniProt_human	A0A087WVQ6	6259	191936	248	248	59	59	3.93	Clathrin heavy chain OS=Homo sapiens GN=CLTC PE=1 SV=1
2	1	UniProt_human	O14654	5595	133685	188	188	30	30	1.95	Insulin receptor substrate 4 OS=Homo sapiens GN=IRS4 PE=1 SV=1
3	1	UniProt_human	P13645	3358	58792	107	107	25	25	11.39	Keratin, type I cytoskeletal 10 OS=Homo sapiens GN=KRT10 PE=1 SV=6
4	1	UniProt_human	Q7L576	3153	145089	150	150	44	44	3.59	Cytoplasmic FMR1-interacting protein 1 OS=Homo sapiens GN=CYFIP1 PE=1 SV=1
5	1	UniProt_human	P35908	2652	65393	95	95	30	30	6.94	Keratin, type II cytoskeletal 2 epidermal OS=Homo sapiens GN=KRT2 PE=1 SV=2
6	1	UniProt_human	P07814	2629	170483	119	119	41	41	2.07	Bifunctional glutamate/proline--tRNA ligase OS=Homo sapiens GN=EPRS PE=1 SV=5
7	1	UniProt_human	Q9UQE7	2558	141454	111	111	49	49	4.06	Structural maintenance of chromosomes protein 3 OS=Homo sapiens GN=SMC3 PE=1 SV=2
5	2	UniProt_human	P04264	2417	65999	100	100	30	30	7.84	Keratin, type II cytoskeletal 1 OS=Homo sapiens GN=KRT1 PE=1 SV=6
8	1	UniProt_human	Q8TEX9	2415	118640	77	77	24	24	1.72	Importin-4 OS=Homo sapiens GN=IPO4 PE=1 SV=2
9	1	UniProt_human	P05023	2340	112824	84	84	25	25	2.09	Sodium/potassium-transporting ATPase subunit alpha-1 OS=Homo sapiens GN=ATP1A1 PE=1 SV=1
10	1	UniProt_human	Q08211	2284	140869	104	104	32	32	1.87	ATP-dependent RNA helicase A OS=Homo sapiens GN=DHX9 PE=1 SV=4
11	1	UniProt_human	Q16531	2105	126887	117	117	34	34	2.95	DNA damage-binding protein 1 OS=Homo sapiens GN=DDB1 PE=1 SV=1
12	1	UniProt_human	P41252	2074	144406	90	90	33	33	2.06	Isoleucine--tRNA ligase, cytoplasmic OS=Homo sapiens GN=IARS PE=1 SV=2
4	2	UniProt_human	E7EVJ5	2045	142485	108	108	39	39	2.5	Cytoplasmic FMR1-interacting protein 2 OS=Homo sapiens GN=CYFIP2 PE=1 SV=1
13	1	UniProt_human	Q9C0C7-4	1994	132756	75	75	32	32	1.87	Isoform 4 of Activating molecule in BECN1-regulated autophagy protein 1 OS=Homo sapiens GN=AMBRA1
14	1	UniProt_human	P53621	1988	138258	89	89	34	34	2.02	Coatomer subunit alpha OS=Homo sapiens GN=COPA PE=1 SV=2
15	1	UniProt_human	P35573	1966	174652	107	107	41	41	1.99	Glycogen debranching enzyme OS=Homo sapiens GN=AGL PE=1 SV=3
16	1	UniProt_human	P19338	1935	76568	96	96	26	26	3.45	Nucleolin OS=Homo sapiens GN=NCL PE=1 SV=3
17	1	UniProt_human	P52701	1910	152689	84	84	30	30	1.44	DNA mismatch repair protein Msh6 OS=Homo sapiens GN=MSH6 PE=1 SV=2
18	1	UniProt_human	C9J2Y9	1888	132971	92	92	32	32	1.96	DNA-directed RNA polymerase subunit beta OS=Homo sapiens GN=POLR2B PE=1 SV=2
19	1	UniProt_human	Q8WUM0	1883	128898	69	69	31	31	1.97	Nuclear pore complex protein Nup133 OS=Homo sapiens GN=NUP133 PE=1 SV=2
3	2	UniProt_human	P02533	1840	51529	63	63	20	20	9.8	Keratin, type I cytoskeletal 14 OS=Homo sapiens GN=KRT14 PE=1 SV=4
20	1	UniProt_human	Q00839	1830	90528	57	57	13	13	1.22	Heterogeneous nuclear ribonucleoprotein U OS=Homo sapiens GN=HNRNPU PE=1 SV=6
21	1	UniProt_human	P35527	1815	62027	65	65	21	21	4.14	Keratin, type I cytoskeletal 9 OS=Homo sapiens GN=KRT9 PE=1 SV=3
22	1	UniProt_human	Q14683	1791	143144	100	100	42	42	2.92	Structural maintenance of chromosomes protein 1A OS=Homo sapiens GN=SMC1A PE=1 SV=2
23	1	UniProt_human	P16591	1695	94578	67	67	16	16	1.57	Tyrosine-protein kinase Fer OS=Homo sapiens GN=FER PE=1 SV=2
3	3	UniProt_human	P08779	1676	51236	64	64	23	23	10.85	Keratin, type I cytoskeletal 16 OS=Homo sapiens GN=KRT16 PE=1 SV=4
24	1	UniProt_human	Q9P2J5	1597	134379	79	79	31	31	1.75	Leucine--tRNA ligase, cytoplasmic OS=Homo sapiens GN=LARS PE=1 SV=2
25	1	UniProt_human	Q9NVI1	1584	149229	85	85	45	45	2.81	Fanconi anemia group I protein OS=Homo sapiens GN=FANCI PE=1 SV=4
26	1	UniProt_human	E7EX90	1581	139008	73	73	33	33	1.92	Dynactin subunit 1 OS=Homo sapiens GN=DCTN1 PE=1 SV=1
27	1	UniProt_human	E9PDF6	1532	128400	67	67	31	31	1.88	Unconventional myosin-Ib OS=Homo sapiens GN=MYO1B PE=1 SV=1
28	1	UniProt_human	Q15393	1515	135492	58	58	24	24	1.12	Splicing factor 3B subunit 3 OS=Homo sapiens GN=SF3B3 PE=1 SV=4
29	1	UniProt_human	Q9NTJ3	1465	147091	83	83	37	37	2	Structural maintenance of chromosomes protein 4 OS=Homo sapiens GN=SMC4 PE=1 SV=2
30	1	UniProt_human	Q13576	1464	180465	59	59	35	35	1.28	Ras GTPase-activating-like protein IQGAP2 OS=Homo sapiens GN=IQGAP2 PE=1 SV=4
31	1	UniProt_human	Q86VP6	1452	136289	68	68	26	26	1.32	Cullin-associated NEDD8-dissociated protein 1 OS=Homo sapiens GN=CAND1 PE=1 SV=2
32	1	UniProt_human	O75533	1447	145738	76	76	31	31	1.54	Splicing factor 3B subunit 1 OS=Homo sapiens GN=SF3B1 PE=1 SV=3
33	1	UniProt_human	Q14152	1444	166468	68	68	27	27	1.15	Eukaryotic translation initiation factor 3 subunit A OS=Homo sapiens GN=EIF3A PE=1 SV=1
34	1	UniProt_human	P16615	1418	114683	57	57	20	20	1.34	Sarcoplasmic/endoplasmic reticulum calcium ATPase 2 OS=Homo sapiens GN=ATP2A2 PE=1 SV=1
35	1	UniProt_human	Q96P70	1411	115889	51	51	16	16	1.16	Importin-9 OS=Homo sapiens GN=IPO9 PE=1 SV=3
36	1	UniProt_human	O95347	1403	135572	77	77	36	36	2.5	Structural maintenance of chromosomes protein 2 OS=Homo sapiens GN=SMC2 PE=1 SV=2
37	1	UniProt_human	Q9BQG0	1367	148762	58	58	22	22	0.93	Myb-binding protein 1A OS=Homo sapiens GN=MYBBP1A PE=1 SV=2
38	1	UniProt_human	F8W726	1343	113559	43	43	14	14	0.75	Ubiquitin-associated protein 2-like OS=Homo sapiens GN=UBAP2L PE=1 SV=2
39	1	UniProt_human	Q15029	1323	109366	60	60	20	20	1.26	116 kDa U5 small nuclear ribonucleoprotein component OS=Homo sapiens GN=EFTUD2 PE=1 SV=1
40	1	UniProt_human	J3KR97	1248	136464	53	53	22	22	1.05	Tubulin-specific chaperone D OS=Homo sapiens GN=TBCD PE=1 SV=1
41	1	UniProt_human	P42704	1177	157805	55	55	31	31	1.37	Leucine-rich PPR motif-containing protein, mitochondrial OS=Homo sapiens GN=LRPPRC PE=1 SV=3
42	1	UniProt_human	Q6PGP7	1160	175375	41	41	23	23	0.75	Tetratricopeptide repeat protein 37 OS=Homo sapiens GN=TTC37 PE=1 SV=1
43	1	UniProt_human	P28340	1143	123553	58	58	26	26	1.71	DNA polymerase delta catalytic subunit OS=Homo sapiens GN=POLD1 PE=1 SV=2
44	1	UniProt_human	P78527	1124	468788	55	55	36	36	0.4	DNA-dependent protein kinase catalytic subunit OS=Homo sapiens GN=PRKDC PE=1 SV=3
45	1	UniProt_human	Q9HAV4	1110	136222	50	50	19	19	0.93	Exportin-5 OS=Homo sapiens GN=XPO5 PE=1 SV=1
46	1	UniProt_human	Q92625	1089	123032	56	56	24	24	1.54	Ankyrin repeat and SAM domain-containing protein 1A OS=Homo sapiens GN=ANKS1A PE=1 SV=4
47	1	UniProt_human	Q92900	1080	124267	49	49	23	23	1.19	Regulator of nonsense transcripts 1 OS=Homo sapiens GN=UPF1 PE=1 SV=2
48	1	UniProt_human	O95163	1037	150159	40	40	21	21	0.86	Elongator complex protein 1 OS=Homo sapiens GN=IKBKAP PE=1 SV=3
49	1	UniProt_human	Q4VCS5	1024	118013	43	43	18	18	1.05	Angiomotin OS=Homo sapiens GN=AMOT PE=1 SV=1
50	1	UniProt_human	Q9NYU2	1004	177078	48	48	24	24	0.87	UDP-glucose:glycoprotein glucosyltransferase 1 OS=Homo sapiens GN=UGGT1 PE=1 SV=3
51	1	UniProt_human	P29597	998	133565	53	53	20	20	1.01	Non-receptor tyrosine-protein kinase TYK2 OS=Homo sapiens GN=TYK2 PE=1 SV=3
52	1	UniProt_human	Q13435	973	100165	45	45	15	15	1.06	Splicing factor 3B subunit 2 OS=Homo sapiens GN=SF3B2 PE=1 SV=2
53	1	UniProt_human	Q15477	969	137668	55	55	28	28	1.45	Helicase SKI2W OS=Homo sapiens GN=SKIV2L PE=1 SV=3
54	1	UniProt_human	Q9BXW9	949	164025	45	45	19	19	0.64	Fanconi anemia group D2 protein OS=Homo sapiens GN=FANCD2 PE=1 SV=2
52	2	UniProt_human	E9PPJ0	946	98109	44	44	15	15	1.09	Splicing factor 3B subunit 2 OS=Homo sapiens GN=SF3B2 PE=1 SV=1
55	1	UniProt_human	P11274	946	142730	53	53	22	22	1.04	Breakpoint cluster region protein OS=Homo sapiens GN=BCR PE=1 SV=2
56	1	UniProt_human	Q8TD19	930	107100	33	33	9	9	0.43	Serine/threonine-protein kinase Nek9 OS=Homo sapiens GN=NEK9 PE=1 SV=2
5	3	UniProt_human	P02538	922	60008	51	51	22	22	4.82	Keratin, type II cytoskeletal 6A OS=Homo sapiens GN=KRT6A PE=1 SV=3
57	1	UniProt_human	A0A0C4DGB6	920	69181	24	24	3	3	0.2	Serum albumin OS=Homo sapiens GN=ALB PE=1 SV=1
58	1	UniProt_human	A0A1B0GTW1	907	140641	59	59	28	28	1.55	Tight junction protein ZO-2 OS=Homo sapiens GN=TJP2 PE=4 SV=1
59	1	UniProt_human	Q9BQE3	874	49863	35	35	11	11	1.54	Tubulin alpha-1C chain OS=Homo sapiens GN=TUBA1C PE=1 SV=1
5	4	UniProt_human	P04259	873	60030	50	50	21	21	4.43	Keratin, type II cytoskeletal 6B OS=Homo sapiens GN=KRT6B PE=1 SV=5
60	1	UniProt_human	Q9HC35	850	108848	35	35	19	19	1.1	Echinoderm microtubule-associated protein-like 4 OS=Homo sapiens GN=EML4 PE=1 SV=3
61	1	UniProt_human	A0A087X2H1	836	289451	46	46	28	28	0.51	E3 ubiquitin-protein ligase HECTD1 OS=Homo sapiens GN=HECTD1 PE=1 SV=1
31	2	UniProt_human	O75155	794	135171	36	36	17	17	0.82	Cullin-associated NEDD8-dissociated protein 2 OS=Homo sapiens GN=CAND2 PE=1 SV=3
62	1	UniProt_human	Q99707	792	140437	31	31	17	17	0.67	Methionine synthase OS=Homo sapiens GN=MTR PE=1 SV=2
63	1	UniProt_human	F8VPD4	780	235873	33	33	21	21	0.49	CAD protein OS=Homo sapiens GN=CAD PE=1 SV=1
64	1	UniProt_human	Q6ZRV2	774	127044	29	29	17	17	0.76	Protein FAM83H OS=Homo sapiens GN=FAM83H PE=1 SV=3
65	1	UniProt_human	Q5H9R7	769	97608	35	35	17	17	1.09	Serine/threonine-protein phosphatase 6 regulatory subunit 3 OS=Homo sapiens GN=PPP6R3 PE=1 SV=2
10	2	UniProt_human	Q7L2E3-2	757	136030	47	47	25	25	1.25	Isoform 2 of Putative ATP-dependent RNA helicase DHX30 OS=Homo sapiens GN=DHX30
66	1	UniProt_human	Q99570	749	153007	29	29	16	16	0.56	Phosphoinositide 3-kinase regulatory subunit 4 OS=Homo sapiens GN=PIK3R4 PE=1 SV=3
67	1	UniProt_human	Q9Y4H2	745	137249	35	35	18	18	0.75	Insulin receptor substrate 2 OS=Homo sapiens GN=IRS2 PE=1 SV=2
68	1	UniProt_human	P78347	737	112346	32	32	17	17	1.05	General transcription factor II-I OS=Homo sapiens GN=GTF2I PE=1 SV=2
69	1	UniProt_human	Q5JP53	734	47736	40	40	12	12	2.77	Tubulin beta chain OS=Homo sapiens GN=TUBB PE=1 SV=1
70	1	UniProt_human	P10586	733	212744	37	37	19	19	0.46	Receptor-type tyrosine-protein phosphatase F OS=Homo sapiens GN=PTPRF PE=1 SV=2
71	1	UniProt_human	J3KNL6	705	251738	38	38	20	20	0.43	Protein transport protein Sec16A OS=Homo sapiens GN=SEC16A PE=1 SV=1
72	1	UniProt_human	Q15021	691	157082	35	35	20	20	0.72	Condensin complex subunit 1 OS=Homo sapiens GN=NCAPD2 PE=1 SV=3
69	2	UniProt_human	P68371	684	49799	37	37	11	11	2.01	Tubulin beta-4B chain OS=Homo sapiens GN=TUBB4B PE=1 SV=1
73	1	UniProt_human	P19174	678	148438	24	24	15	15	0.54	1-phosphatidylinositol 4,5-bisphosphate phosphodiesterase gamma-1 OS=Homo sapiens GN=PLCG1 PE=1 SV=1
74	1	UniProt_human	Q8N122	667	148942	26	26	13	13	0.45	Regulatory-associated protein of mTOR OS=Homo sapiens GN=RPTOR PE=1 SV=1
75	1	UniProt_human	Q9UL54-2	665	119207	41	41	21	21	1.27	Isoform 2 of Serine/threonine-protein kinase TAO2 OS=Homo sapiens GN=TAOK2
76	1	UniProt_human	E3W994	659	138778	26	26	16	16	0.63	CLIP-associating protein 2 OS=Homo sapiens GN=CLASP2 PE=1 SV=2
5	5	UniProt_human	P13647	621	62340	40	40	18	18	2.88	Keratin, type II cytoskeletal 5 OS=Homo sapiens GN=KRT5 PE=1 SV=3
77	1	UniProt_human	Q5JWT2	620	157012	28	28	15	15	0.5	Mediator of RNA polymerase II transcription subunit 23 OS=Homo sapiens GN=MED23 PE=1 SV=1
78	1	UniProt_human	Q86XI2	616	130876	32	32	16	16	0.68	Condensin-2 complex subunit G2 OS=Homo sapiens GN=NCAPG2 PE=1 SV=1
79	1	UniProt_human	E9PF10	606	148000	21	21	16	16	0.58	Nuclear pore complex protein Nup155 OS=Homo sapiens GN=NUP155 PE=1 SV=1
80	1	UniProt_human	P04626	606	137821	25	25	13	13	0.54	Receptor tyrosine-protein kinase erbB-2 OS=Homo sapiens GN=ERBB2 PE=1 SV=1
76	2	UniProt_human	E7ERI8	601	165525	26	26	18	18	0.59	CLIP-associating protein 2 OS=Homo sapiens GN=CLASP2 PE=1 SV=1
81	1	UniProt_human	P42695	598	168783	28	28	14	14	0.46	Condensin-2 complex subunit D3 OS=Homo sapiens GN=NCAPD3 PE=1 SV=2
82	1	UniProt_human	A0A0D9SF54	574	282662	31	31	24	24	0.44	Spectrin alpha chain, non-erythrocytic 1 OS=Homo sapiens GN=SPTAN1 PE=1 SV=1
83	1	UniProt_human	O95487	570	137331	36	36	14	14	0.54	Protein transport protein Sec24B OS=Homo sapiens GN=SEC24B PE=1 SV=2
84	1	UniProt_human	Q8IUD2-2	534	113850	22	22	13	13	0.62	Isoform 2 of ELKS/Rab6-interacting/CAST family member 1 OS=Homo sapiens GN=ERC1
75	2	UniProt_human	Q7L7X3	529	115997	32	32	16	16	0.86	Serine/threonine-protein kinase TAO1 OS=Homo sapiens GN=TAOK1 PE=1 SV=1
69	3	UniProt_human	A0A0B4J269	523	88324	29	29	8	8	0.7	Uncharacterized protein OS=Homo sapiens PE=1 SV=1
85	1	UniProt_human	B5ME19	519	105407	24	24	13	13	0.69	Eukaryotic translation initiation factor 3 subunit C-like protein OS=Homo sapiens GN=EIF3CL PE=3 SV=1
86	1	UniProt_human	Q9BWH6	517	152659	24	24	16	16	0.56	RNA polymerase II-associated protein 1 OS=Homo sapiens GN=RPAP1 PE=1 SV=3
87	1	UniProt_human	Q96L35	507	102493	24	24	14	14	0.79	EPH receptor B4, isoform CRA_b OS=Homo sapiens GN=EPHB4 PE=1 SV=1
88	1	UniProt_human	Q14126	469	122218	16	16	11	11	0.47	Desmoglein-2 OS=Homo sapiens GN=DSG2 PE=1 SV=2
89	1	UniProt_human	Q7Z3U7	464	190237	27	27	14	14	0.37	Protein MON2 homolog OS=Homo sapiens GN=MON2 PE=1 SV=3
90	1	UniProt_human	Q6PKG0	456	123434	23	23	13	13	0.62	La-related protein 1 OS=Homo sapiens GN=LARP1 PE=1 SV=2
91	1	UniProt_human	C9J5X1	450	154691	25	25	10	10	0.35	Tyrosine-protein kinase receptor OS=Homo sapiens GN=IGF1R PE=1 SV=1
93	1	UniProt_human	Q9C0B7	437	120671	21	21	14	14	0.64	Transport and Golgi organization protein 6 homolog OS=Homo sapiens GN=TANGO6 PE=1 SV=2
92	1	UniProt_human	A0A0R4J2E8	437	94565	18	18	10	10	0.57	Matrin-3 OS=Homo sapiens GN=MATR3 PE=1 SV=1
94	1	UniProt_human	Q9UPY3	426	218542	15	15	10	10	0.21	Endoribonuclease Dicer OS=Homo sapiens GN=DICER1 PE=1 SV=3
95	1	UniProt_human	P26640	425	140387	19	19	11	11	0.39	Valine--tRNA ligase OS=Homo sapiens GN=VARS PE=1 SV=4
96	1	UniProt_human	A0A0C4DG89	422	117389	17	17	10	10	0.44	Probable ATP-dependent RNA helicase DDX46 OS=Homo sapiens GN=DDX46 PE=1 SV=1
97	1	UniProt_human	Q9Y5B9	420	119838	22	22	13	13	0.64	FACT complex subunit SPT16 OS=Homo sapiens GN=SUPT16H PE=1 SV=1
98	1	UniProt_human	Q5SRE5	418	195917	23	23	13	13	0.36	Nucleoporin NUP188 homolog OS=Homo sapiens GN=NUP188 PE=1 SV=1
100	1	UniProt_human	Q15459	414	88831	28	28	15	15	1.05	Splicing factor 3A subunit 1 OS=Homo sapiens GN=SF3A1 PE=1 SV=1
99	1	UniProt_human	O43164	414	78166	8	8	5	5	0.31	E3 ubiquitin-protein ligase Praja-2 OS=Homo sapiens GN=PJA2 PE=1 SV=4
101	1	UniProt_human	O95373	412	119440	18	18	11	11	0.48	Importin-7 OS=Homo sapiens GN=IPO7 PE=1 SV=1
102	1	UniProt_human	Q9BZH6	409	136598	17	17	11	11	0.41	WD repeat-containing protein 11 OS=Homo sapiens GN=WDR11 PE=1 SV=1
103	1	UniProt_human	P46087	408	89247	13	13	9	9	0.53	Probable 28S rRNA (cytosine(4447)-C(5))-methyltransferase OS=Homo sapiens GN=NOP2 PE=1 SV=2
104	1	UniProt_human	D6REX3	405	136141	14	14	8	8	0.32	Protein transport protein Sec31A OS=Homo sapiens GN=SEC31A PE=1 SV=1
105	1	UniProt_human	A0A087WWK8	404	124399	23	23	12	12	0.51	IQ motif and SEC7 domain-containing protein 1 OS=Homo sapiens GN=IQSEC1 PE=1 SV=1
106	1	UniProt_human	Q14694	395	87080	23	23	11	11	0.71	Ubiquitin carboxyl-terminal hydrolase 10 OS=Homo sapiens GN=USP10 PE=1 SV=2
107	1	UniProt_human	P09874	394	113012	25	25	15	15	0.76	Poly [ADP-ribose] polymerase 1 OS=Homo sapiens GN=PARP1 PE=1 SV=4
108	1	UniProt_human	P54764	394	109790	16	16	7	7	0.36	Ephrin type-A receptor 4 OS=Homo sapiens GN=EPHA4 PE=1 SV=1
3	4	UniProt_human	Q04695	387	48076	19	19	10	10	1.63	Keratin, type I cytoskeletal 17 OS=Homo sapiens GN=KRT17 PE=1 SV=2
109	1	UniProt_human	P05141	386	32831	27	27	9	9	2.17	ADP/ATP translocase 2 OS=Homo sapiens GN=SLC25A5 PE=1 SV=7
110	1	UniProt_human	Q66K74	378	112142	23	23	11	11	0.52	Microtubule-associated protein 1S OS=Homo sapiens GN=MAP1S PE=1 SV=2
111	1	UniProt_human	Q96JK2	376	103899	21	21	12	12	0.63	DDB1- and CUL4-associated factor 5 OS=Homo sapiens GN=DCAF5 PE=1 SV=2
112	1	UniProt_human	Q66K14	376	140436	20	20	11	11	0.39	TBC1 domain family member 9B OS=Homo sapiens GN=TBC1D9B PE=1 SV=3
113	1	UniProt_human	Q8N163	375	102838	21	21	11	11	0.57	Cell cycle and apoptosis regulator protein 2 OS=Homo sapiens GN=CCAR2 PE=1 SV=2
114	1	UniProt_human	A0A0C4DG33	373	136499	28	28	15	15	0.59	Peroxisome biogenesis factor 1 OS=Homo sapiens GN=PEX1 PE=1 SV=1
115	1	UniProt_human	Q5T1Z4	370	126678	17	17	11	11	0.5	Pumilio homolog 1 OS=Homo sapiens GN=PUM1 PE=1 SV=1
116	1	UniProt_human	O15067	364	144643	17	17	10	10	0.34	Phosphoribosylformylglycinamidine synthase OS=Homo sapiens GN=PFAS PE=1 SV=4
117	1	UniProt_human	H3BUF6	363	112644	23	23	13	13	0.63	Ataxin-2-like protein OS=Homo sapiens GN=ATXN2L PE=1 SV=1
118	1	UniProt_human	P06213	358	156232	16	16	9	9	0.28	Insulin receptor OS=Homo sapiens GN=INSR PE=1 SV=4
119	1	UniProt_human	Q9Y2A7	352	128707	20	20	13	13	0.54	Nck-associated protein 1 OS=Homo sapiens GN=NCKAP1 PE=1 SV=1
109	2	UniProt_human	P12236	347	32845	25	25	9	9	2.17	ADP/ATP translocase 3 OS=Homo sapiens GN=SLC25A6 PE=1 SV=4
7	2	UniProt_human	O75116	347	160799	16	16	12	12	0.37	Rho-associated protein kinase 2 OS=Homo sapiens GN=ROCK2 PE=1 SV=4
120	1	UniProt_human	F2Z2E2	346	179372	11	11	9	9	0.24	Ras GTPase-activating-like protein IQGAP3 OS=Homo sapiens GN=IQGAP3 PE=1 SV=1
122	1	UniProt_human	Q6Y7W6	344	149978	15	15	10	10	0.37	PERQ amino acid-rich with GYF domain-containing protein 2 OS=Homo sapiens GN=GIGYF2 PE=1 SV=1
121	1	UniProt_human	O00443	344	190559	18	18	11	11	0.28	Phosphatidylinositol 4-phosphate 3-kinase C2 domain-containing subunit alpha OS=Homo sapiens GN=PIK3C2A PE=1 SV=2
123	1	UniProt_human	Q00325	343	40069	11	11	5	5	0.88	Phosphate carrier protein, mitochondrial OS=Homo sapiens GN=SLC25A3 PE=1 SV=2
124	1	UniProt_human	Q6AI08	341	128699	14	14	11	11	0.44	HEAT repeat-containing protein 6 OS=Homo sapiens GN=HEATR6 PE=1 SV=1
125	1	UniProt_human	P19022	338	99747	8	8	5	5	0.29	Cadherin-2 OS=Homo sapiens GN=CDH2 PE=1 SV=4
3	5	UniProt_human	Q7Z3Y7	331	50536	17	17	4	4	0.95	Keratin, type I cytoskeletal 28 OS=Homo sapiens GN=KRT28 PE=1 SV=2
126	1	UniProt_human	H0YH87	330	98056	11	11	8	8	0.41	Ataxin-2 (Fragment) OS=Homo sapiens GN=ATXN2 PE=1 SV=1
127	1	UniProt_human	Q9H6S0	329	160147	20	20	15	15	0.49	Probable ATP-dependent RNA helicase YTHDC2 OS=Homo sapiens GN=YTHDC2 PE=1 SV=2
128	1	UniProt_human	Q93009	326	128220	15	15	11	11	0.44	Ubiquitin carboxyl-terminal hydrolase 7 OS=Homo sapiens GN=USP7 PE=1 SV=2
129	1	UniProt_human	Q8N1F8	324	121325	15	15	9	9	0.37	Serine/threonine-protein kinase 11-interacting protein OS=Homo sapiens GN=STK11IP PE=1 SV=3
130	1	UniProt_human	Q01804	323	123968	16	16	11	11	0.46	OTU domain-containing protein 4 OS=Homo sapiens GN=OTUD4 PE=1 SV=4
132	1	UniProt_human	A0A024R4E5	318	141352	21	21	13	13	0.57	High density lipoprotein binding protein (Vigilin), isoform CRA_a OS=Homo sapiens GN=HDLBP PE=1 SV=1
131	1	UniProt_human	Q92616	318	292572	20	20	16	16	0.26	eIF-2-alpha kinase activator GCN1 OS=Homo sapiens GN=GCN1 PE=1 SV=6
133	1	UniProt_human	H0YBP1	315	115488	23	23	15	15	0.74	Focal adhesion kinase 1 (Fragment) OS=Homo sapiens GN=PTK2 PE=1 SV=1
134	1	UniProt_human	Q86UP2-2	315	149519	15	15	14	14	0.49	Isoform 2 of Kinectin OS=Homo sapiens GN=KTN1
135	1	UniProt_human	P27816	314	120930	10	10	6	6	0.23	Microtubule-associated protein 4 OS=Homo sapiens GN=MAP4 PE=1 SV=3
136	1	UniProt_human	Q13045	313	144659	14	14	8	8	0.26	Protein flightless-1 homolog OS=Homo sapiens GN=FLII PE=1 SV=2
137	1	UniProt_human	J3KP97	304	174785	15	15	12	12	0.34	Coiled-coil domain-containing protein 18 (Fragment) OS=Homo sapiens GN=CCDC18 PE=1 SV=1
138	1	UniProt_human	O43719	302	85801	16	16	10	10	0.64	HIV Tat-specific factor 1 OS=Homo sapiens GN=HTATSF1 PE=1 SV=1
139	1	UniProt_human	Q15678	301	135175	14	14	10	10	0.37	Tyrosine-protein phosphatase non-receptor type 14 OS=Homo sapiens GN=PTPN14 PE=1 SV=2
140	1	UniProt_human	Q7Z4L5	296	150840	11	11	7	7	0.22	Tetratricopeptide repeat protein 21B OS=Homo sapiens GN=TTC21B PE=1 SV=2
83	2	UniProt_human	O95486	292	119674	10	10	5	5	0.24	Protein transport protein Sec24A OS=Homo sapiens GN=SEC24A PE=1 SV=2
141	1	UniProt_human	P53396	290	120762	11	11	7	7	0.28	ATP-citrate synthase OS=Homo sapiens GN=ACLY PE=1 SV=3
142	1	UniProt_human	O60306	289	171186	17	17	12	12	0.35	Intron-binding protein aquarius OS=Homo sapiens GN=AQR PE=1 SV=4
143	1	UniProt_human	A0A087X0M0	288	87828	8	8	6	6	0.34	Coiled-coil domain-containing protein R3HCC1L OS=Homo sapiens GN=R3HCC1L PE=1 SV=1
144	1	UniProt_human	P52732	285	119085	12	12	8	8	0.33	Kinesin-like protein KIF11 OS=Homo sapiens GN=KIF11 PE=1 SV=2
145	1	UniProt_human	O14776	281	123823	13	13	7	7	0.27	Transcription elongation regulator 1 OS=Homo sapiens GN=TCERG1 PE=1 SV=2
146	1	UniProt_human	P46821	278	270468	19	19	10	10	0.19	Microtubule-associated protein 1B OS=Homo sapiens GN=MAP1B PE=1 SV=2
147	1	UniProt_human	A0A0C4DG98	274	169475	13	13	7	7	0.19	THO complex subunit 2 OS=Homo sapiens GN=THOC2 PE=1 SV=1
149	1	UniProt_human	Q9UPN7	266	96664	19	19	11	11	0.62	Serine/threonine-protein phosphatase 6 regulatory subunit 1 OS=Homo sapiens GN=PPP6R1 PE=1 SV=5
148	1	UniProt_human	P55884	266	92424	13	13	7	7	0.44	Eukaryotic translation initiation factor 3 subunit B OS=Homo sapiens GN=EIF3B PE=1 SV=3
150	1	UniProt_human	A0A087X2D8	262	145080	17	17	13	13	0.51	C-Jun-amino-terminal kinase-interacting protein 4 OS=Homo sapiens GN=SPAG9 PE=1 SV=1
151	1	UniProt_human	I3L1P4	258	15057	4	4	2	2	0.73	Proline-, glutamic acid- and leucine-rich protein 1 (Fragment) OS=Homo sapiens GN=PELP1 PE=1 SV=1
152	1	UniProt_human	A5YKK6	258	266768	13	13	10	10	0.17	CCR4-NOT transcription complex subunit 1 OS=Homo sapiens GN=CNOT1 PE=1 SV=2
153	1	UniProt_human	Q9Y5B6	254	104739	12	12	8	8	0.38	PAX3- and PAX7-binding protein 1 OS=Homo sapiens GN=PAXBP1 PE=1 SV=2
154	1	UniProt_human	Q6VY07	253	104833	8	8	6	6	0.28	Phosphofurin acidic cluster sorting protein 1 OS=Homo sapiens GN=PACS1 PE=1 SV=2
155	1	UniProt_human	O94822	252	200423	8	8	6	6	0.14	E3 ubiquitin-protein ligase listerin OS=Homo sapiens GN=LTN1 PE=1 SV=6
156	1	UniProt_human	Q58WW2	247	96232	9	9	6	6	0.3	DDB1- and CUL4-associated factor 6 OS=Homo sapiens GN=DCAF6 PE=1 SV=1
157	1	UniProt_human	O43491	244	112519	9	9	6	6	0.25	Band 4.1-like protein 2 OS=Homo sapiens GN=EPB41L2 PE=1 SV=1
158	1	UniProt_human	H0Y4E8	238	150001	13	13	10	10	0.33	Serine/threonine-protein kinase SIK3 (Fragment) OS=Homo sapiens GN=SIK3 PE=1 SV=1
159	1	UniProt_human	Q9NP73	238	125975	7	7	5	5	0.18	Putative bifunctional UDP-N-acetylglucosamine transferase and deubiquitinase ALG13 OS=Homo sapiens GN=ALG13 PE=1 SV=2
5	6	UniProt_human	P12035	236	64378	13	13	6	6	0.58	Keratin, type II cytoskeletal 3 OS=Homo sapiens GN=KRT3 PE=1 SV=3
160	1	UniProt_human	A0A087X054	236	104713	10	10	8	8	0.38	Hypoxia up-regulated protein 1 OS=Homo sapiens GN=HYOU1 PE=1 SV=1
161	1	UniProt_human	C9J1X3	235	114878	12	12	5	5	0.3	Activated CDC42 kinase 1 OS=Homo sapiens GN=TNK2 PE=1 SV=1
162	1	UniProt_human	Q6P158	234	155507	6	6	6	6	0.18	Putative ATP-dependent RNA helicase DHX57 OS=Homo sapiens GN=DHX57 PE=1 SV=2
163	1	UniProt_human	J3QS39	233	10463	8	8	2	2	1.19	Polyubiquitin-B (Fragment) OS=Homo sapiens GN=UBB PE=1 SV=1
164	1	UniProt_human	Q5T6F2	230	117044	9	9	5	5	0.2	Ubiquitin-associated protein 2 OS=Homo sapiens GN=UBAP2 PE=1 SV=1
58	2	UniProt_human	A0A087X0K9	227	187734	14	14	11	11	0.28	Tight junction protein ZO-1 OS=Homo sapiens GN=TJP1 PE=1 SV=1
165	1	UniProt_human	Q6R327	226	192097	12	12	8	8	0.19	Rapamycin-insensitive companion of mTOR OS=Homo sapiens GN=RICTOR PE=1 SV=1
50	2	UniProt_human	Q9NYU1	223	174624	13	13	10	10	0.28	UDP-glucose:glycoprotein glucosyltransferase 2 OS=Homo sapiens GN=UGGT2 PE=1 SV=4
166	1	UniProt_human	O15042	221	118219	10	10	8	8	0.33	U2 snRNP-associated SURP motif-containing protein OS=Homo sapiens GN=U2SURP PE=1 SV=2
167	1	UniProt_human	Q92922	220	122790	15	15	8	8	0.32	SWI/SNF complex subunit SMARCC1 OS=Homo sapiens GN=SMARCC1 PE=1 SV=3
168	1	UniProt_human	Q9UNY4	219	129508	16	16	13	13	0.53	Transcription termination factor 2 OS=Homo sapiens GN=TTF2 PE=1 SV=2
169	1	UniProt_human	Q92542	217	78362	9	9	6	6	0.38	Nicastrin OS=Homo sapiens GN=NCSTN PE=1 SV=2
170	1	UniProt_human	Q8TEQ6	216	168483	10	10	8	8	0.22	Gem-associated protein 5 OS=Homo sapiens GN=GEMIN5 PE=1 SV=3
172	1	UniProt_human	Q15758	215	56562	11	11	5	5	0.45	Neutral amino acid transporter B(0) OS=Homo sapiens GN=SLC1A5 PE=1 SV=2
171	1	UniProt_human	E9PL24	215	126871	8	8	7	7	0.26	Myomegalin OS=Homo sapiens GN=PDE4DIP PE=1 SV=2
173	1	UniProt_human	A0A0U1RQF0	215	273026	11	11	10	10	0.17	Fatty acid synthase OS=Homo sapiens GN=FASN PE=1 SV=1
87	2	UniProt_human	Q15375	214	112024	9	9	7	7	0.3	Ephrin type-A receptor 7 OS=Homo sapiens GN=EPHA7 PE=1 SV=3
174	1	UniProt_human	E9PHX8	213	90964	12	12	7	7	0.39	Tyrosine-protein kinase Mer OS=Homo sapiens GN=MERTK PE=1 SV=1
175	1	UniProt_human	Q9Y613	213	126473	11	11	9	9	0.35	FH1/FH2 domain-containing protein 1 OS=Homo sapiens GN=FHOD1 PE=1 SV=3
176	1	UniProt_human	P11498	211	129551	7	7	4	4	0.14	Pyruvate carboxylase, mitochondrial OS=Homo sapiens GN=PC PE=1 SV=2
177	1	UniProt_human	H0Y8E6	209	94051	14	14	10	10	0.57	DNA helicase (Fragment) OS=Homo sapiens GN=MCM2 PE=1 SV=1
179	1	UniProt_human	P04844	207	69241	7	7	6	6	0.44	Dolichyl-diphosphooligosaccharide--protein glycosyltransferase subunit 2 OS=Homo sapiens GN=RPN2 PE=1 SV=3
178	1	UniProt_human	H0Y2V6	207	171980	7	7	5	5	0.13	Centrosomal protein of 170 kDa (Fragment) OS=Homo sapiens GN=CEP170 PE=1 SV=1
180	1	UniProt_human	P29317	203	108197	9	9	8	8	0.37	Ephrin type-A receptor 2 OS=Homo sapiens GN=EPHA2 PE=1 SV=2
181	1	UniProt_human	P56945	202	93314	6	6	4	4	0.2	Breast cancer anti-estrogen resistance protein 1 OS=Homo sapiens GN=BCAR1 PE=1 SV=2
182	1	UniProt_human	Q5T8P6-2	201	110956	13	13	10	10	0.47	Isoform 2 of RNA-binding protein 26 OS=Homo sapiens GN=RBM26
183	1	UniProt_human	F5H658	201	133917	7	7	6	6	0.21	ATP-dependent RNA helicase DHX8 OS=Homo sapiens GN=DHX8 PE=1 SV=1
185	1	UniProt_human	A6NIT2	199	132549	10	10	9	9	0.33	Phosphorylase b kinase regulatory subunit alpha, skeletal muscle isoform OS=Homo sapiens GN=PHKA1 PE=1 SV=1
186	1	UniProt_human	P82094	199	122767	9	9	8	8	0.32	TATA element modulatory factor OS=Homo sapiens GN=TMF1 PE=1 SV=2
184	1	UniProt_human	Q13395	199	181559	10	10	8	8	0.21	Probable methyltransferase TARBP1 OS=Homo sapiens GN=TARBP1 PE=1 SV=1
187	1	UniProt_human	J3KN16	198	223552	13	13	11	11	0.23	Proteasome-associated protein ECM29 homolog OS=Homo sapiens GN=KIAA0368 PE=1 SV=1
188	1	UniProt_human	Q96ST3	195	145085	6	6	5	5	0.16	Paired amphipathic helix protein Sin3a OS=Homo sapiens GN=SIN3A PE=1 SV=2
189	1	UniProt_human	A0A087WVP4	194	104782	8	8	6	6	0.28	Smoothelin OS=Homo sapiens GN=SMTN PE=1 SV=1
87	3	UniProt_human	P29323	192	117417	8	8	5	5	0.2	Ephrin type-B receptor 2 OS=Homo sapiens GN=EPHB2 PE=1 SV=5
190	1	UniProt_human	O60343	192	146471	5	5	4	4	0.12	TBC1 domain family member 4 OS=Homo sapiens GN=TBC1D4 PE=1 SV=2
191	1	UniProt_human	A0A087WW46	191	122031	13	13	8	8	0.32	Nodal modulator 1 OS=Homo sapiens GN=NOMO1 PE=1 SV=1
80	2	UniProt_human	P00533	187	134190	9	9	6	6	0.21	Epidermal growth factor receptor OS=Homo sapiens GN=EGFR PE=1 SV=2
76	3	UniProt_human	F8WA11	186	162658	8	8	7	7	0.2	CLIP-associating protein 1 OS=Homo sapiens GN=CLASP1 PE=1 SV=2
192	1	UniProt_human	O15360	186	162671	8	8	7	7	0.2	Fanconi anemia group A protein OS=Homo sapiens GN=FANCA PE=1 SV=2
193	1	UniProt_human	Q14147	186	128040	5	5	5	5	0.18	Probable ATP-dependent RNA helicase DHX34 OS=Homo sapiens GN=DHX34 PE=1 SV=2
194	1	UniProt_human	H0Y5C0	185	151152	11	11	10	10	0.32	Adhesion G protein-coupled receptor L2 (Fragment) OS=Homo sapiens GN=ADGRL2 PE=1 SV=1
195	1	UniProt_human	Q9BXP5	184	100604	11	11	9	9	0.46	Serrate RNA effector molecule homolog OS=Homo sapiens GN=SRRT PE=1 SV=1
196	1	UniProt_human	F2Z2X4	184	130070	8	8	5	5	0.18	Exportin-4 OS=Homo sapiens GN=XPO4 PE=1 SV=1
199	1	UniProt_human	Q9BPX3	183	114262	8	8	6	6	0.25	Condensin complex subunit 3 OS=Homo sapiens GN=NCAPG PE=1 SV=1
198	1	UniProt_human	P08581	183	155441	12	12	8	8	0.24	Hepatocyte growth factor receptor OS=Homo sapiens GN=MET PE=1 SV=4
197	1	UniProt_human	O00411	183	138532	6	6	6	6	0.2	DNA-directed RNA polymerase, mitochondrial OS=Homo sapiens GN=POLRMT PE=1 SV=2
200	1	UniProt_human	O14974	183	115211	6	6	5	5	0.2	Protein phosphatase 1 regulatory subunit 12A OS=Homo sapiens GN=PPP1R12A PE=1 SV=1
203	1	UniProt_human	Q9P035	181	43132	11	11	7	7	0.98	Very-long-chain (3R)-3-hydroxyacyl-CoA dehydratase 3 OS=Homo sapiens GN=HACD3 PE=1 SV=2
201	1	UniProt_human	O00267	181	120925	12	12	8	8	0.32	Transcription elongation factor SPT5 OS=Homo sapiens GN=SUPT5H PE=1 SV=1
202	1	UniProt_human	F5GY05	181	106048	6	6	5	5	0.22	Constitutive coactivator of peroxisome proliferator-activated receptor gamma OS=Homo sapiens GN=FAM120B PE=1 SV=1
204	1	UniProt_human	A0A0C4DGS5	179	111590	7	7	6	6	0.26	Golgi autoantigen, golgin subfamily a, 2, isoform CRA_a OS=Homo sapiens GN=GOLGA2 PE=1 SV=1
205	1	UniProt_human	O60502-4	178	96869	9	9	6	6	0.3	Isoform 4 of Protein O-GlcNAcase OS=Homo sapiens GN=MGEA5
206	1	UniProt_human	Q15020	177	109865	9	9	6	6	0.26	Squamous cell carcinoma antigen recognized by T-cells 3 OS=Homo sapiens GN=SART3 PE=1 SV=1
208	1	UniProt_human	Q9Y4B6	176	168900	9	9	7	7	0.19	Protein VPRBP OS=Homo sapiens GN=VPRBP PE=1 SV=3
207	1	UniProt_human	Q8IY17	176	149900	6	6	5	5	0.15	Neuropathy target esterase OS=Homo sapiens GN=PNPLA6 PE=1 SV=2
209	1	UniProt_human	Q5VWV2	171	144402	8	8	7	7	0.23	Partitioning defective 3 homolog OS=Homo sapiens GN=PARD3 PE=1 SV=1
210	1	UniProt_human	Q9BSJ8	171	122780	5	5	4	4	0.15	Extended synaptotagmin-1 OS=Homo sapiens GN=ESYT1 PE=1 SV=1
211	1	UniProt_human	P42285	170	117729	11	11	8	8	0.33	Superkiller viralicidic activity 2-like 2 OS=Homo sapiens GN=SKIV2L2 PE=1 SV=3
167	2	UniProt_human	F8VXC8	170	136100	9	9	6	6	0.21	SWI/SNF complex subunit SMARCC2 OS=Homo sapiens GN=SMARCC2 PE=1 SV=1
212	1	UniProt_human	Q86W92-2	169	113110	6	6	4	4	0.16	Isoform 2 of Liprin-beta-1 OS=Homo sapiens GN=PPFIBP1
213	1	UniProt_human	O00203	168	121244	9	9	6	6	0.23	AP-3 complex subunit beta-1 OS=Homo sapiens GN=AP3B1 PE=1 SV=3
214	1	UniProt_human	A0A024RCR6	168	118629	6	6	4	4	0.15	HLA-B associated transcript 3, isoform CRA_a OS=Homo sapiens GN=BAT3 PE=1 SV=1
215	1	UniProt_human	Q5VTE0	167	50153	9	9	4	4	0.52	Putative elongation factor 1-alpha-like 3 OS=Homo sapiens GN=EEF1A1P5 PE=5 SV=1
216	1	UniProt_human	Q5T8U5	165	21114	2	2	1	1	0.22	Surfeit 4 OS=Homo sapiens GN=SURF4 PE=1 SV=1
217	1	UniProt_human	J3QK89	164	104868	8	8	6	6	0.27	Calcium homeostasis endoplasmic reticulum protein OS=Homo sapiens GN=CHERP PE=1 SV=1
218	1	UniProt_human	H0YAN8	162	109583	8	8	6	6	0.26	Rho guanine nucleotide exchange factor 10 (Fragment) OS=Homo sapiens GN=ARHGEF10 PE=1 SV=1
219	1	UniProt_human	K7EIG1	162	140514	9	9	6	6	0.2	Clustered mitochondria protein homolog (Fragment) OS=Homo sapiens GN=CLUH PE=1 SV=2
220	1	UniProt_human	J3KNA1	159	107187	8	8	7	7	0.32	Kinesin-like protein OS=Homo sapiens GN=KIF5A PE=1 SV=1
221	1	UniProt_human	Q6P2E9	159	151567	11	11	8	8	0.25	Enhancer of mRNA-decapping protein 4 OS=Homo sapiens GN=EDC4 PE=1 SV=1
222	1	UniProt_human	Q5JTH9	159	143611	6	6	5	5	0.16	RRP12-like protein OS=Homo sapiens GN=RRP12 PE=1 SV=2
224	1	UniProt_human	P15924-2	158	259957	12	12	9	9	0.18	Isoform DPII of Desmoplakin OS=Homo sapiens GN=DSP
223	1	UniProt_human	A0A087X1Z1	158	118516	6	6	4	4	0.15	Gamma-tubulin complex component OS=Homo sapiens GN=TUBGCP5 PE=1 SV=1
225	1	UniProt_human	A0A0A0MT33	158	148768	5	5	2	2	0.06	Protein SCAF8 OS=Homo sapiens GN=SCAF8 PE=1 SV=1
219	2	UniProt_human	I3L2B0	156	138142	9	9	6	6	0.2	Clustered mitochondria protein homolog (Fragment) OS=Homo sapiens GN=CLUH PE=1 SV=2
226	1	UniProt_human	P53985	155	53909	6	6	3	3	0.27	Monocarboxylate transporter 1 OS=Homo sapiens GN=SLC16A1 PE=1 SV=3
225	2	UniProt_human	O95104	155	125790	6	6	3	3	0.11	Splicing factor, arginine/serine-rich 15 OS=Homo sapiens GN=SCAF4 PE=1 SV=3
227	1	UniProt_human	O60524	154	122878	7	7	5	5	0.19	Nuclear export mediator factor NEMF OS=Homo sapiens GN=NEMF PE=1 SV=4
228	1	UniProt_human	V9GYM8	154	115999	5	5	4	4	0.16	Rho guanine nucleotide exchange factor 2 OS=Homo sapiens GN=ARHGEF2 PE=1 SV=1
151	2	UniProt_human	C9JFV4	154	124865	5	5	3	3	0.11	Proline-, glutamic acid- and leucine-rich protein 1 OS=Homo sapiens GN=PELP1 PE=1 SV=2
229	1	UniProt_human	J3KPF3	153	68059	10	10	9	9	0.75	4F2 cell-surface antigen heavy chain OS=Homo sapiens GN=SLC3A2 PE=1 SV=1
230	1	UniProt_human	Q92878	153	153797	13	13	11	11	0.36	DNA repair protein RAD50 OS=Homo sapiens GN=RAD50 PE=1 SV=1
231	1	UniProt_human	J3KN01	153	207489	4	4	2	2	0.04	Protein AFDN OS=Homo sapiens GN=AFDN PE=1 SV=1
233	1	UniProt_human	A0A0J9YY18	152	35509	4	4	3	3	0.43	Band 4.1-like protein 3 (Fragment) OS=Homo sapiens GN=EPB41L3 PE=1 SV=1
232	1	UniProt_human	G3V198	152	148876	9	9	6	6	0.19	Nuclear pore complex protein Nup160 (Fragment) OS=Homo sapiens GN=NUP160 PE=1 SV=2
234	1	UniProt_human	P23458	148	133191	8	8	5	5	0.17	Tyrosine-protein kinase JAK1 OS=Homo sapiens GN=JAK1 PE=1 SV=2
235	1	UniProt_human	B1ALB4	146	84777	6	6	5	5	0.28	Protein SMG7 (Fragment) OS=Homo sapiens GN=SMG7 PE=1 SV=8
237	1	UniProt_human	Q32MZ4-4	145	73016	3	3	2	2	0.12	Isoform 4 of Leucine-rich repeat flightless-interacting protein 1 OS=Homo sapiens GN=LRRFIP1
236	1	UniProt_human	Q58EX7	145	130720	3	3	2	2	0.07	Puratrophin-1 OS=Homo sapiens GN=PLEKHG4 PE=1 SV=1
238	1	UniProt_human	Q8IY81	144	96499	6	6	4	4	0.19	pre-rRNA processing protein FTSJ3 OS=Homo sapiens GN=FTSJ3 PE=1 SV=2
240	1	UniProt_human	J3QS41	142	218920	7	7	7	7	0.15	Probable helicase with zinc finger domain OS=Homo sapiens GN=HELZ PE=1 SV=1
239	1	UniProt_human	P14543	142	136291	5	5	4	4	0.13	Nidogen-1 OS=Homo sapiens GN=NID1 PE=1 SV=3
241	1	UniProt_human	P35251	141	128175	7	7	5	5	0.18	Replication factor C subunit 1 OS=Homo sapiens GN=RFC1 PE=1 SV=4
243	1	UniProt_human	Q9H0K1	139	103849	5	5	5	5	0.23	Serine/threonine-protein kinase SIK2 OS=Homo sapiens GN=SIK2 PE=1 SV=1
242	1	UniProt_human	O60231	139	119189	6	6	5	5	0.19	Putative pre-mRNA-splicing factor ATP-dependent RNA helicase DHX16 OS=Homo sapiens GN=DHX16 PE=1 SV=2
237	2	UniProt_human	Q32MZ4	137	89199	5	5	5	5	0.27	Leucine-rich repeat flightless-interacting protein 1 OS=Homo sapiens GN=LRRFIP1 PE=1 SV=2
220	2	UniProt_human	P33176	135	109617	6	6	5	5	0.21	Kinesin-1 heavy chain OS=Homo sapiens GN=KIF5B PE=1 SV=1
244	1	UniProt_human	Q9P2M7	135	136304	4	4	4	4	0.13	Cingulin OS=Homo sapiens GN=CGN PE=1 SV=2
245	1	UniProt_human	Q8WVB6-3	133	61830	3	3	3	3	0.23	Isoform 3 of Chromosome transmission fidelity protein 18 homolog OS=Homo sapiens GN=CHTF18
246	1	UniProt_human	Q9H4L7	133	117328	5	5	4	4	0.16	SWI/SNF-related matrix-associated actin-dependent regulator of chromatin subfamily A containing DEAD/H box 1 OS=Homo sapiens GN=SMARCAD1 PE=1 SV=2
248	1	UniProt_human	Q6PD62	130	133420	5	5	5	5	0.17	RNA polymerase-associated protein CTR9 homolog OS=Homo sapiens GN=CTR9 PE=1 SV=1
247	1	UniProt_human	Q5TC82-2	130	124764	5	5	4	4	0.15	Isoform 2 of Roquin-1 OS=Homo sapiens GN=RC3H1
249	1	UniProt_human	Q12965	129	126982	3	3	3	3	0.11	Unconventional myosin-Ie OS=Homo sapiens GN=MYO1E PE=1 SV=2
250	1	UniProt_human	Q9NZ01	128	36011	4	4	2	2	0.26	Very-long-chain enoyl-CoA reductase OS=Homo sapiens GN=TECR PE=1 SV=1
251	1	UniProt_human	Q9UNS1	125	138572	4	4	3	3	0.1	Protein timeless homolog OS=Homo sapiens GN=TIMELESS PE=1 SV=2
65	2	UniProt_human	O75170	124	104876	5	5	3	3	0.13	Serine/threonine-protein phosphatase 6 regulatory subunit 2 OS=Homo sapiens GN=PPP6R2 PE=1 SV=2
252	1	UniProt_human	F8VQX7	124	81606	4	4	1	1	0.05	Oxysterol-binding protein (Fragment) OS=Homo sapiens GN=OSBPL8 PE=1 SV=1
253	1	UniProt_human	A0A0C4DGA6	123	113786	7	7	5	5	0.21	Helicase-like transcription factor OS=Homo sapiens GN=HLTF PE=1 SV=1
254	1	UniProt_human	Q9UBN7	123	131336	4	4	3	3	0.1	Histone deacetylase 6 OS=Homo sapiens GN=HDAC6 PE=1 SV=2
113	2	UniProt_human	H3BP71	121	108982	6	6	6	6	0.26	E3 ubiquitin-protein ligase BRE1B OS=Homo sapiens GN=RNF40 PE=1 SV=2
255	1	UniProt_human	Q9Y6A5	121	90304	4	4	3	3	0.15	Transforming acidic coiled-coil-containing protein 3 OS=Homo sapiens GN=TACC3 PE=1 SV=1
256	1	UniProt_human	Q92621	120	227776	9	9	8	8	0.16	Nuclear pore complex protein Nup205 OS=Homo sapiens GN=NUP205 PE=1 SV=3
258	1	UniProt_human	Q9H2M9	119	155886	4	4	3	3	0.09	Rab3 GTPase-activating protein non-catalytic subunit OS=Homo sapiens GN=RAB3GAP2 PE=1 SV=1
257	1	UniProt_human	A0A087WW77	119	114355	3	3	2	2	0.08	Lethal(2) giant larvae protein homolog 1 OS=Homo sapiens GN=LLGL1 PE=1 SV=1
259	1	UniProt_human	Q9H792	118	192986	7	7	7	7	0.17	Pseudopodium-enriched atypical kinase 1 OS=Homo sapiens GN=PEAK1 PE=1 SV=4
260	1	UniProt_human	O15084	116	112894	7	7	6	6	0.25	Serine/threonine-protein phosphatase 6 regulatory ankyrin repeat subunit A OS=Homo sapiens GN=ANKRD28 PE=1 SV=5
261	1	UniProt_human	D6RAA6	116	25207	2	2	1	1	0.18	Transmembrane protein 33 (Fragment) OS=Homo sapiens GN=TMEM33 PE=1 SV=1
262	1	UniProt_human	Q7Z5K2	116	132863	4	4	3	3	0.1	Wings apart-like protein homolog OS=Homo sapiens GN=WAPL PE=1 SV=1
263	1	UniProt_human	U3KQK0	115	18792	2	2	2	2	0.56	Histone H2B OS=Homo sapiens GN=HIST1H2BN PE=1 SV=1
264	1	UniProt_human	Q96QU8	115	128801	5	5	4	4	0.14	Exportin-6 OS=Homo sapiens GN=XPO6 PE=1 SV=1
265	1	UniProt_human	B0QZ35	113	49207	1	1	1	1	0.09	NAD-dependent protein deacetylase sirtuin-1 OS=Homo sapiens GN=SIRT1 PE=1 SV=1
266	1	UniProt_human	Q9Y2H2	113	128326	4	4	2	2	0.07	Phosphatidylinositide phosphatase SAC2 OS=Homo sapiens GN=INPP5F PE=1 SV=3
267	1	UniProt_human	P49756	112	100124	7	7	6	6	0.29	RNA-binding protein 25 OS=Homo sapiens GN=RBM25 PE=1 SV=3
268	1	UniProt_human	Q9UPZ3	111	127368	3	3	3	3	0.11	Hermansky-Pudlak syndrome 5 protein OS=Homo sapiens GN=HPS5 PE=1 SV=2
270	1	UniProt_human	E7ESH4	110	25210	2	2	2	2	0.39	60 kDa heat shock protein, mitochondrial (Fragment) OS=Homo sapiens GN=HSPD1 PE=1 SV=1
113	3	UniProt_human	Q9H0A0	110	115657	8	8	8	8	0.34	RNA cytidine acetyltransferase OS=Homo sapiens GN=NAT10 PE=1 SV=2
271	1	UniProt_human	P07996	110	129300	3	3	3	3	0.1	Thrombospondin-1 OS=Homo sapiens GN=THBS1 PE=1 SV=2
272	1	UniProt_human	Q9C0H5	109	121210	5	5	4	4	0.15	Rho GTPase-activating protein 39 OS=Homo sapiens GN=ARHGAP39 PE=1 SV=2
269	1	UniProt_human	O95835	109	126790	3	3	2	2	0.07	Serine/threonine-protein kinase LATS1 OS=Homo sapiens GN=LATS1 PE=1 SV=1
273	1	UniProt_human	Q9ULJ7	107	155761	3	3	3	3	0.09	Ankyrin repeat domain-containing protein 50 OS=Homo sapiens GN=ANKRD50 PE=1 SV=4
274	1	UniProt_human	Q96SB8	106	126246	4	4	4	4	0.14	Structural maintenance of chromosomes protein 6 OS=Homo sapiens GN=SMC6 PE=1 SV=2
275	1	UniProt_human	Q13136	105	135695	4	4	4	4	0.13	Liprin-alpha-1 OS=Homo sapiens GN=PPFIA1 PE=1 SV=1
7	3	UniProt_human	P55011	105	131364	3	3	3	3	0.1	Solute carrier family 12 member 2 OS=Homo sapiens GN=SLC12A2 PE=1 SV=1
276	1	UniProt_human	H0Y2W2	104	64315	3	3	2	2	0.14	ATPase family AAA domain-containing protein 3A (Fragment) OS=Homo sapiens GN=ATAD3A PE=1 SV=1
277	1	UniProt_human	Q12955-6	103	111029	6	6	4	4	0.17	Isoform 4 of Ankyrin-3 OS=Homo sapiens GN=ANK3
278	1	UniProt_human	O15357	102	138513	8	8	7	7	0.24	Phosphatidylinositol 3,4,5-trisphosphate 5-phosphatase 2 OS=Homo sapiens GN=INPPL1 PE=1 SV=2
279	1	UniProt_human	O60264	102	121828	6	6	5	5	0.19	SWI/SNF-related matrix-associated actin-dependent regulator of chromatin subfamily A member 5 OS=Homo sapiens GN=SMARCA5 PE=1 SV=1
280	1	UniProt_human	Q08378	102	167252	5	5	5	5	0.14	Golgin subfamily A member 3 OS=Homo sapiens GN=GOLGA3 PE=1 SV=2
281	1	UniProt_human	Q9NSV4	102	136839	4	4	3	3	0.1	Protein diaphanous homolog 3 OS=Homo sapiens GN=DIAPH3 PE=1 SV=4
282	1	UniProt_human	Q8WWI1-3	101	153575	3	3	3	3	0.09	Isoform 3 of LIM domain only protein 7 OS=Homo sapiens GN=LMO7
283	1	UniProt_human	Q86US8	101	160362	3	3	3	3	0.08	Telomerase-binding protein EST1A OS=Homo sapiens GN=SMG6 PE=1 SV=2
284	1	UniProt_human	O95071	101	309158	5	5	5	5	0.07	E3 ubiquitin-protein ligase UBR5 OS=Homo sapiens GN=UBR5 PE=1 SV=2
285	1	UniProt_human	P55072	100	89266	6	6	5	5	0.27	Transitional endoplasmic reticulum ATPase OS=Homo sapiens GN=VCP PE=1 SV=4
286	1	UniProt_human	Q86XP3	100	102912	3	3	3	3	0.13	ATP-dependent RNA helicase DDX42 OS=Homo sapiens GN=DDX42 PE=1 SV=1
287	1	UniProt_human	Q96P48	99	162089	6	6	5	5	0.14	Arf-GAP with Rho-GAP domain, ANK repeat and PH domain-containing protein 1 OS=Homo sapiens GN=ARAP1 PE=1 SV=3
288	1	UniProt_human	Q02878	98	32708	3	3	2	2	0.29	60S ribosomal protein L6 OS=Homo sapiens GN=RPL6 PE=1 SV=3
290	1	UniProt_human	Q8WVS4	97	122496	3	3	3	3	0.11	WD repeat-containing protein 60 OS=Homo sapiens GN=WDR60 PE=1 SV=3
289	1	UniProt_human	O14980	97	123306	2	2	2	2	0.07	Exportin-1 OS=Homo sapiens GN=XPO1 PE=1 SV=1
291	1	UniProt_human	A0A0A0MRA5	97	85887	1	1	1	1	0.05	Heterogeneous nuclear ribonucleoprotein U-like protein 1 OS=Homo sapiens GN=HNRNPUL1 PE=1 SV=1
292	1	UniProt_human	P46977	96	80477	6	6	5	5	0.3	Dolichyl-diphosphooligosaccharide--protein glycosyltransferase subunit STT3A OS=Homo sapiens GN=STT3A PE=1 SV=2
294	1	UniProt_human	Q8N3U4	96	141235	4	4	4	4	0.13	Cohesin subunit SA-2 OS=Homo sapiens GN=STAG2 PE=1 SV=3
293	1	UniProt_human	Q15075	96	162367	2	2	2	2	0.05	Early endosome antigen 1 OS=Homo sapiens GN=EEA1 PE=1 SV=2
295	1	UniProt_human	J3KP15	95	15362	2	2	1	1	0.31	Serine/arginine-rich-splicing factor 2 (Fragment) OS=Homo sapiens GN=SRSF2 PE=1 SV=8
297	1	UniProt_human	P07900	94	84607	3	3	3	3	0.16	Heat shock protein HSP 90-alpha OS=Homo sapiens GN=HSP90AA1 PE=1 SV=5
298	1	UniProt_human	Q12797	94	85809	3	3	3	3	0.16	Aspartyl/asparaginyl beta-hydroxylase OS=Homo sapiens GN=ASPH PE=1 SV=3
296	1	UniProt_human	Q9HBG6	94	141735	1	1	1	1	0.03	Intraflagellar transport protein 122 homolog OS=Homo sapiens GN=IFT122 PE=1 SV=2
300	1	UniProt_human	Q16513	93	111964	4	4	4	4	0.16	Serine/threonine-protein kinase N2 OS=Homo sapiens GN=PKN2 PE=1 SV=1
299	1	UniProt_human	H0Y720	93	148587	4	4	3	3	0.09	Trinucleotide repeat-containing gene 6B protein (Fragment) OS=Homo sapiens GN=TNRC6B PE=1 SV=1
303	1	UniProt_human	O43290	92	90200	6	6	6	6	0.33	U4/U6.U5 tri-snRNP-associated protein 1 OS=Homo sapiens GN=SART1 PE=1 SV=1
304	1	UniProt_human	P22314	92	117774	3	3	3	3	0.11	Ubiquitin-like modifier-activating enzyme 1 OS=Homo sapiens GN=UBA1 PE=1 SV=3
302	1	UniProt_human	Q6AWC2	92	133809	4	4	3	3	0.1	Protein WWC2 OS=Homo sapiens GN=WWC2 PE=1 SV=2
301	1	UniProt_human	Q8TEV9	92	104956	2	2	2	2	0.08	Smith-Magenis syndrome chromosomal region candidate gene 8 protein OS=Homo sapiens GN=SMCR8 PE=1 SV=2
305	1	UniProt_human	A0A0A0MR66	91	110299	2	2	2	2	0.08	RNA binding motif protein 10, isoform CRA_d OS=Homo sapiens GN=RBM10 PE=1 SV=1
306	1	UniProt_human	H0YNK6	90	92257	3	3	3	3	0.15	Tyrosine-protein kinase receptor TYRO3 OS=Homo sapiens GN=TYRO3 PE=1 SV=1
307	1	UniProt_human	A0A087X0M4	90	82839	4	4	2	2	0.11	Kanadaptin OS=Homo sapiens GN=SLC4A1AP PE=1 SV=1
312	1	UniProt_human	E9PD35	89	146362	5	5	5	5	0.16	Vascular endothelial growth factor receptor 3 OS=Homo sapiens GN=FLT4 PE=1 SV=1
310	1	UniProt_human	Q9BRR8	89	103282	3	3	3	3	0.13	G patch domain-containing protein 1 OS=Homo sapiens GN=GPATCH1 PE=1 SV=1
309	1	UniProt_human	Q02413	89	113676	3	3	3	3	0.12	Desmoglein-1 OS=Homo sapiens GN=DSG1 PE=1 SV=2
308	1	UniProt_human	A0A087X256	89	136415	3	3	2	2	0.06	WASH complex subunit 7 OS=Homo sapiens GN=KIAA1033 PE=1 SV=1
311	1	UniProt_human	O75643	89	244353	2	2	2	2	0.04	U5 small nuclear ribonucleoprotein 200 kDa helicase OS=Homo sapiens GN=SNRNP200 PE=1 SV=2
313	1	UniProt_human	O94991	88	107418	5	5	3	3	0.13	SLIT and NTRK-like protein 5 OS=Homo sapiens GN=SLITRK5 PE=2 SV=2
314	1	UniProt_human	B7Z7P0	87	61963	2	2	2	2	0.15	Ubiquitin conjugation factor E4 A OS=Homo sapiens GN=UBE4A PE=1 SV=1
319	1	UniProt_human	Q9C0J8	87	145799	6	6	3	3	0.09	pre-mRNA 3' end processing protein WDR33 OS=Homo sapiens GN=WDR33 PE=1 SV=2
315	1	UniProt_human	Q15042	87	110454	2	2	2	2	0.08	Rab3 GTPase-activating protein catalytic subunit OS=Homo sapiens GN=RAB3GAP1 PE=1 SV=3
317	1	UniProt_human	F2Z2C0	87	63577	2	2	1	1	0.07	Exosome complex exonuclease RRP44 OS=Homo sapiens GN=DIS3 PE=1 SV=1
316	1	UniProt_human	A0A087WYN9	87	155195	3	3	2	2	0.06	ATP-dependent RNA helicase DHX29 OS=Homo sapiens GN=DHX29 PE=1 SV=1
318	1	UniProt_human	Q14739	87	70658	1	1	1	1	0.06	Lamin-B receptor OS=Homo sapiens GN=LBR PE=1 SV=2
320	1	UniProt_human	Q70EL1	86	187271	1	1	1	1	0.02	Inactive ubiquitin carboxyl-terminal hydrolase 54 OS=Homo sapiens GN=USP54 PE=1 SV=4
321	1	UniProt_human	H0YGW7	85	67619	4	4	3	3	0.21	ATP-binding cassette sub-family F member 1 (Fragment) OS=Homo sapiens GN=ABCF1 PE=1 SV=1
323	1	UniProt_human	H0Y4Z8	85	79587	4	4	3	3	0.17	Chromosome 9 open reading frame 86, isoform CRA_b OS=Homo sapiens GN=RABL6 PE=1 SV=2
322	1	UniProt_human	Q8IZH2	85	193985	4	4	3	3	0.07	5'-3' exoribonuclease 1 OS=Homo sapiens GN=XRN1 PE=1 SV=1
326	1	UniProt_human	P06748	84	32555	3	3	2	2	0.3	Nucleophosmin OS=Homo sapiens GN=NPM1 PE=1 SV=2
324	1	UniProt_human	A0A087X1U9	84	43934	1	1	1	1	0.1	Cyclin-G-associated kinase OS=Homo sapiens GN=GAK PE=1 SV=1
325	1	UniProt_human	P43007	84	55688	1	1	1	1	0.08	Neutral amino acid transporter A OS=Homo sapiens GN=SLC1A4 PE=1 SV=1
328	1	UniProt_human	I3L0W0	83	21771	2	2	1	1	0.21	A-kinase anchor protein 1, mitochondrial (Fragment) OS=Homo sapiens GN=AKAP1 PE=1 SV=1
330	1	UniProt_human	Q8IY18	83	128726	2	2	2	2	0.07	Structural maintenance of chromosomes protein 5 OS=Homo sapiens GN=SMC5 PE=1 SV=2
329	1	UniProt_human	H0YM23	83	263203	3	3	3	3	0.05	Ankyrin repeat domain-containing protein 17 (Fragment) OS=Homo sapiens GN=ANKRD17 PE=1 SV=1
327	1	UniProt_human	A0A087WWA3	83	201883	1	1	1	1	0.02	Kinesin-like protein KIF1B OS=Homo sapiens GN=KIF1B PE=1 SV=1
334	1	UniProt_human	E7EPB3	82	14549	1	1	1	1	0.33	60S ribosomal protein L14 OS=Homo sapiens GN=RPL14 PE=1 SV=1
279	2	UniProt_human	A0A0A0MRP6	82	122786	4	4	4	4	0.15	Probable global transcription activator SNF2L1 OS=Homo sapiens GN=SMARCA1 PE=1 SV=1
331	1	UniProt_human	A2RRE0	82	89287	2	2	2	2	0.1	WD repeat-containing protein 7 OS=Homo sapiens GN=WDR7 PE=1 SV=1
333	1	UniProt_human	Q92620	82	140415	3	3	3	3	0.1	Pre-mRNA-splicing factor ATP-dependent RNA helicase PRP16 OS=Homo sapiens GN=DHX38 PE=1 SV=2
332	1	UniProt_human	Q96RG2	82	142839	2	2	2	2	0.06	PAS domain-containing serine/threonine-protein kinase OS=Homo sapiens GN=PASK PE=1 SV=3
336	1	UniProt_human	P81605	80	11277	3	3	2	2	1.07	Dermcidin OS=Homo sapiens GN=DCD PE=1 SV=2
335	1	UniProt_human	H0Y2M0	80	154649	3	3	2	2	0.06	Transmembrane protein 131-like (Fragment) OS=Homo sapiens GN=KIAA0922 PE=1 SV=1
338	1	UniProt_human	Q9NZB2	79	121811	7	7	5	5	0.19	Constitutive coactivator of PPAR-gamma-like protein 1 OS=Homo sapiens GN=FAM120A PE=1 SV=2
75	3	UniProt_human	Q9H2K8	79	105340	7	7	3	3	0.13	Serine/threonine-protein kinase TAO3 OS=Homo sapiens GN=TAOK3 PE=1 SV=2
337	1	UniProt_human	P49321	79	85186	2	2	2	2	0.1	Nuclear autoantigenic sperm protein OS=Homo sapiens GN=NASP PE=1 SV=2
339	1	UniProt_human	Q99575	78	114636	4	4	3	3	0.12	Ribonucleases P/MRP protein subunit POP1 OS=Homo sapiens GN=POP1 PE=1 SV=2
341	1	UniProt_human	P31327	78	164835	4	4	4	4	0.11	Carbamoyl-phosphate synthase [ammonia], mitochondrial OS=Homo sapiens GN=CPS1 PE=1 SV=2
342	1	UniProt_human	P13473	78	44932	1	1	1	1	0.1	Lysosome-associated membrane glycoprotein 2 OS=Homo sapiens GN=LAMP2 PE=1 SV=2
343	1	UniProt_human	Q8TCN5	78	105700	2	2	2	2	0.08	Zinc finger protein 507 OS=Homo sapiens GN=ZNF507 PE=1 SV=2
340	1	UniProt_human	A6NN50	78	196977	3	3	3	3	0.07	Obscurin-like protein 1 OS=Homo sapiens GN=OBSL1 PE=1 SV=1
344	1	UniProt_human	Q5T0W9	77	114729	3	3	3	3	0.12	Protein FAM83B OS=Homo sapiens GN=FAM83B PE=1 SV=1
345	1	UniProt_human	Q86W56	77	111041	2	2	2	2	0.08	Poly(ADP-ribose) glycohydrolase OS=Homo sapiens GN=PARG PE=1 SV=1
346	1	UniProt_human	Q96RT1	77	158200	4	4	3	3	0.08	Erbin OS=Homo sapiens GN=ERBIN PE=1 SV=2
347	1	UniProt_human	B4DGL8	77	77072	2	2	1	1	0.06	ATP-binding cassette sub-family B member 7, mitochondrial (Fragment) OS=Homo sapiens GN=ABCB7 PE=1 SV=1
349	1	UniProt_human	A0A087X295	76	124921	4	4	4	4	0.15	WD repeat-containing protein 6 OS=Homo sapiens GN=WDR6 PE=1 SV=1
348	1	UniProt_human	O14617	76	130076	3	3	3	3	0.1	AP-3 complex subunit delta-1 OS=Homo sapiens GN=AP3D1 PE=1 SV=1
351	1	UniProt_human	A0A0G2JIW1	76	70066	1	1	1	1	0.06	Heat shock 70 kDa protein 1B OS=Homo sapiens GN=HSPA1B PE=1 SV=1
350	1	UniProt_human	J3QSE8	76	112395	1	1	1	1	0.04	Fanconi anemia group J protein OS=Homo sapiens GN=BRIP1 PE=1 SV=1
352	1	UniProt_human	A0A0U1RR32	75	18470	1	1	1	1	0.25	Histone H2A OS=Homo sapiens GN=hCG_2039566 PE=3 SV=1
353	1	UniProt_human	Q92896	75	134464	2	2	2	2	0.07	Golgi apparatus protein 1 OS=Homo sapiens GN=GLG1 PE=1 SV=2
356	1	UniProt_human	O75146	74	119315	4	4	4	4	0.15	Huntingtin-interacting protein 1-related protein OS=Homo sapiens GN=HIP1R PE=1 SV=2
354	1	UniProt_human	A0A0A0MTH9	74	206802	3	3	2	2	0.04	TATA-binding protein-associated factor 172 OS=Homo sapiens GN=BTAF1 PE=1 SV=1
355	1	UniProt_human	A0A0A0MQY7	74	136624	1	1	1	1	0.03	VWFA and cache domain-containing protein 1 OS=Homo sapiens GN=CACHD1 PE=1 SV=1
358	1	UniProt_human	A0A0C4DGC7	73	35040	2	2	2	2	0.27	Regulator of telomere elongation helicase 1 (Fragment) OS=Homo sapiens GN=RTEL1 PE=4 SV=1
359	1	UniProt_human	Q9NW08	73	127702	4	4	4	4	0.14	DNA-directed RNA polymerase III subunit RPC2 OS=Homo sapiens GN=POLR3B PE=1 SV=2
360	1	UniProt_human	Q9Y6Y8	73	111007	3	3	3	3	0.12	SEC23-interacting protein OS=Homo sapiens GN=SEC23IP PE=1 SV=1
361	1	UniProt_human	Q29RF7	73	150734	2	2	2	2	0.06	Sister chromatid cohesion protein PDS5 homolog A OS=Homo sapiens GN=PDS5A PE=1 SV=1
357	1	UniProt_human	Q5T3Q7	73	233127	4	4	2	2	0.04	HEAT repeat-containing protein 1 OS=Homo sapiens GN=HEATR1 PE=1 SV=1
363	1	UniProt_human	O95674	72	51384	1	1	1	1	0.09	Phosphatidate cytidylyltransferase 2 OS=Homo sapiens GN=CDS2 PE=1 SV=1
362	1	UniProt_human	P48651	72	55491	2	2	1	1	0.08	Phosphatidylserine synthase 1 OS=Homo sapiens GN=PTDSS1 PE=1 SV=1
364	1	UniProt_human	Q9NZJ5	71	125137	1	1	1	1	0.03	Eukaryotic translation initiation factor 2-alpha kinase 3 OS=Homo sapiens GN=EIF2AK3 PE=1 SV=3
365	1	UniProt_human	Q9ULL1	71	155343	1	1	1	1	0.03	Pleckstrin homology domain-containing family G member 1 OS=Homo sapiens GN=PLEKHG1 PE=1 SV=2
369	1	UniProt_human	Q86WV8	70	41128	2	2	1	1	0.11	Hamartin OS=Homo sapiens GN=TSC1 PE=1 SV=1
370	1	UniProt_human	Q10570	70	160782	4	4	4	4	0.11	Cleavage and polyadenylation specificity factor subunit 1 OS=Homo sapiens GN=CPSF1 PE=1 SV=2
367	1	UniProt_human	Q9UPR3	70	113855	2	2	2	2	0.08	Protein SMG5 OS=Homo sapiens GN=SMG5 PE=1 SV=3
366	1	UniProt_human	H0Y8C6	70	123779	3	3	2	2	0.07	Importin-5 (Fragment) OS=Homo sapiens GN=IPO5 PE=1 SV=1
368	1	UniProt_human	O60216	70	71645	1	1	1	1	0.06	Double-strand-break repair protein rad21 homolog OS=Homo sapiens GN=RAD21 PE=1 SV=2
371	1	UniProt_human	O43303	70	113353	1	1	1	1	0.04	Centriolar coiled-coil protein of 110 kDa OS=Homo sapiens GN=CCP110 PE=1 SV=3
372	1	UniProt_human	Q96KR1	70	116939	1	1	1	1	0.04	Zinc finger RNA-binding protein OS=Homo sapiens GN=ZFR PE=1 SV=2
374	1	UniProt_human	E5RG95	69	16447	1	1	1	1	0.29	Beta-enolase (Fragment) OS=Homo sapiens GN=ENO3 PE=1 SV=1
373	1	UniProt_human	A0A0A0MRP0	69	90076	3	3	3	3	0.15	MAP7 domain-containing protein 3 (Fragment) OS=Homo sapiens GN=MAP7D3 PE=1 SV=1
375	1	UniProt_human	E7EMV2	69	78834	1	1	1	1	0.06	Neurofilament medium polypeptide OS=Homo sapiens GN=NEFM PE=1 SV=1
378	1	UniProt_human	F5GXH2	68	12475	1	1	1	1	0.39	L-lactate dehydrogenase A chain (Fragment) OS=Homo sapiens GN=LDHA PE=1 SV=1
377	1	UniProt_human	H7BZK4	68	23627	1	1	1	1	0.19	Sodium-dependent phosphate transporter 1 (Fragment) OS=Homo sapiens GN=SLC20A1 PE=1 SV=1
376	1	UniProt_human	J3KSL8	68	104179	1	1	1	1	0.04	Trafficking protein particle complex subunit 8 OS=Homo sapiens GN=TRAPPC8 PE=1 SV=1
381	1	UniProt_human	Q9UBM7	67	54454	2	2	2	2	0.17	7-dehydrocholesterol reductase OS=Homo sapiens GN=DHCR7 PE=1 SV=1
380	1	UniProt_human	A0A0A0MRG2	67	75062	2	2	2	2	0.12	Amyloid beta A4 protein OS=Homo sapiens GN=APP PE=1 SV=1
382	1	UniProt_human	J3KMZ7	67	133293	3	3	3	3	0.1	Integrator complex subunit 2 OS=Homo sapiens GN=INTS2 PE=1 SV=1
383	1	UniProt_human	A0A0A0MSR2	67	43962	1	1	1	1	0.1	Alpha-adducin OS=Homo sapiens GN=ADD1 PE=1 SV=1
379	1	UniProt_human	F5H6E2	67	118920	1	1	1	1	0.04	Unconventional myosin-Ic OS=Homo sapiens GN=MYO1C PE=1 SV=1
385	1	UniProt_human	Q8NEY1-5	67	160674	1	1	1	1	0.03	Isoform 5 of Neuron navigator 1 OS=Homo sapiens GN=NAV1
384	1	UniProt_human	Q8TEK3	67	184740	3	3	1	1	0.02	Histone-lysine N-methyltransferase, H3 lysine-79 specific OS=Homo sapiens GN=DOT1L PE=1 SV=2
389	1	UniProt_human	S4R3U1	66	9508	3	3	2	2	1.35	Epidermal growth factor receptor substrate 15 (Fragment) OS=Homo sapiens GN=EPS15 PE=1 SV=1
386	1	UniProt_human	E7EUT5	66	27853	1	1	1	1	0.16	Glyceraldehyde-3-phosphate dehydrogenase OS=Homo sapiens GN=GAPDH PE=1 SV=1
387	1	UniProt_human	A0A0U1RRM6	66	87346	2	2	2	2	0.1	Protein enabled homolog OS=Homo sapiens GN=ENAH PE=1 SV=1
392	1	UniProt_human	Q8N4X5	66	91243	3	3	2	2	0.1	Actin filament-associated protein 1-like 2 OS=Homo sapiens GN=AFAP1L2 PE=1 SV=1
390	1	UniProt_human	H0YFK8	66	100298	1	1	1	1	0.04	Glutamate receptor-interacting protein 1 (Fragment) OS=Homo sapiens GN=GRIP1 PE=1 SV=1
388	1	UniProt_human	Q5XPI4	66	148420	1	1	1	1	0.03	E3 ubiquitin-protein ligase RNF123 OS=Homo sapiens GN=RNF123 PE=1 SV=1
391	1	UniProt_human	Q504Q3	66	135281	1	1	1	1	0.03	PAB-dependent poly(A)-specific ribonuclease subunit PAN2 OS=Homo sapiens GN=PAN2 PE=1 SV=3
395	1	UniProt_human	Q2NKX8	65	141015	2	2	2	2	0.06	DNA excision repair protein ERCC-6-like OS=Homo sapiens GN=ERCC6L PE=1 SV=1
396	1	UniProt_human	A6NEM2	65	213343	2	2	2	2	0.04	Host cell factor 1 OS=Homo sapiens GN=HCFC1 PE=1 SV=2
394	1	UniProt_human	Q86YV5	65	149529	1	1	1	1	0.03	Tyrosine-protein kinase SgK223 OS=Homo sapiens GN=SGK223 PE=1 SV=4
393	1	UniProt_human	O75592	65	509759	2	2	2	2	0.02	E3 ubiquitin-protein ligase MYCBP2 OS=Homo sapiens GN=MYCBP2 PE=1 SV=3
398	1	UniProt_human	Q13247	64	39563	2	2	2	2	0.24	Serine/arginine-rich splicing factor 6 OS=Homo sapiens GN=SRSF6 PE=1 SV=2
400	1	UniProt_human	F8WE98	64	66550	2	2	2	2	0.14	Filamin-A (Fragment) OS=Homo sapiens GN=FLNA PE=1 SV=2
402	1	UniProt_human	Q9H9Y6	64	128146	3	3	3	3	0.1	DNA-directed RNA polymerase I subunit RPA2 OS=Homo sapiens GN=POLR1B PE=1 SV=2
399	1	UniProt_human	P78362	64	77478	1	1	1	1	0.06	SRSF protein kinase 2 OS=Homo sapiens GN=SRPK2 PE=1 SV=3
401	1	UniProt_human	P54098	64	139473	2	2	2	2	0.06	DNA polymerase subunit gamma-1 OS=Homo sapiens GN=POLG PE=1 SV=1
397	1	UniProt_human	P11388	64	174276	2	2	2	2	0.05	DNA topoisomerase 2-alpha OS=Homo sapiens GN=TOP2A PE=1 SV=3
405	1	UniProt_human	A0A0C4DGS9	63	31273	3	3	1	1	0.31	Choline/ethanolaminephosphotransferase 1 OS=Homo sapiens GN=CEPT1 PE=1 SV=1
404	1	UniProt_human	O43156	63	121992	3	3	3	3	0.11	TELO2-interacting protein 1 homolog OS=Homo sapiens GN=TTI1 PE=1 SV=3
403	1	UniProt_human	O43592	63	109893	2	2	2	2	0.08	Exportin-T OS=Homo sapiens GN=XPOT PE=1 SV=2
406	1	UniProt_human	A0A087WVF7	63	191478	2	2	2	2	0.05	Intersectin-2 OS=Homo sapiens GN=ITSN2 PE=1 SV=1
411	1	UniProt_human	H0Y8E4	62	118310	2	2	2	2	0.07	Kinase D-interacting substrate of 220 kDa (Fragment) OS=Homo sapiens GN=KIDINS220 PE=1 SV=1
407	1	UniProt_human	Q3KQU3	62	92764	1	1	1	1	0.05	MAP7 domain-containing protein 1 OS=Homo sapiens GN=MAP7D1 PE=1 SV=1
409	1	UniProt_human	E7EUU4	62	171535	3	3	2	2	0.05	Eukaryotic translation initiation factor 4 gamma 1 OS=Homo sapiens GN=EIF4G1 PE=1 SV=1
410	1	UniProt_human	Q96D09	62	93715	1	1	1	1	0.05	G-protein coupled receptor-associated sorting protein 2 OS=Homo sapiens GN=GPRASP2 PE=1 SV=1
412	1	UniProt_human	Q9ULJ3	62	118796	1	1	1	1	0.04	Zinc finger and BTB domain-containing protein 21 OS=Homo sapiens GN=ZBTB21 PE=1 SV=2
408	1	UniProt_human	O95239	62	139794	1	1	1	1	0.03	Chromosome-associated kinesin KIF4A OS=Homo sapiens GN=KIF4A PE=1 SV=3
413	1	UniProt_human	F5GZB4	62	252400	2	2	1	1	0.02	Lipoxygenase homology domain-containing protein 1 OS=Homo sapiens GN=LOXHD1 PE=1 SV=1
414	1	UniProt_human	P22413	61	104857	1	1	1	1	0.04	Ectonucleotide pyrophosphatase/phosphodiesterase family member 1 OS=Homo sapiens GN=ENPP1 PE=1 SV=2
417	1	UniProt_human	Q14692	60	145716	3	3	3	3	0.09	Ribosome biogenesis protein BMS1 homolog OS=Homo sapiens GN=BMS1 PE=1 SV=1
415	1	UniProt_human	O95625	60	119308	2	2	2	2	0.07	Zinc finger and BTB domain-containing protein 11 OS=Homo sapiens GN=ZBTB11 PE=1 SV=2
416	1	UniProt_human	B4DDL8	60	74989	1	1	1	1	0.06	Suppression of tumorigenicity 5 protein OS=Homo sapiens GN=ST5 PE=1 SV=1
419	1	UniProt_human	H7C207	60	88117	1	1	1	1	0.05	R3H domain-containing protein 1 (Fragment) OS=Homo sapiens GN=R3HDM1 PE=1 SV=1
418	1	UniProt_human	P42345	60	288707	2	2	2	2	0.03	Serine/threonine-protein kinase mTOR OS=Homo sapiens GN=MTOR PE=1 SV=1
421	1	UniProt_human	Q9HAU0-3	59	73863	2	2	2	2	0.12	Isoform 3 of Pleckstrin homology domain-containing family A member 5 OS=Homo sapiens GN=PLEKHA5
423	1	UniProt_human	Q66GS9	59	133408	2	2	2	2	0.07	Centrosomal protein of 135 kDa OS=Homo sapiens GN=CEP135 PE=1 SV=2
425	1	UniProt_human	O14964	59	86138	1	1	1	1	0.05	Hepatocyte growth factor-regulated tyrosine kinase substrate OS=Homo sapiens GN=HGS PE=1 SV=1
420	1	UniProt_human	Q13111	59	106860	1	1	1	1	0.04	Chromatin assembly factor 1 subunit A OS=Homo sapiens GN=CHAF1A PE=1 SV=2
422	1	UniProt_human	Q5VXI4	59	115494	1	1	1	1	0.04	Rho guanine nucleotide exchange factor 10-like protein OS=Homo sapiens GN=ARHGEF10L PE=1 SV=2
424	1	UniProt_human	Q14151	59	107408	1	1	1	1	0.04	Scaffold attachment factor B2 OS=Homo sapiens GN=SAFB2 PE=1 SV=1
431	1	UniProt_human	B4DR61	58	52915	3	3	3	3	0.27	Protein transport protein Sec61 subunit alpha isoform 1 OS=Homo sapiens GN=SEC61A1 PE=1 SV=1
429	1	UniProt_human	Q02539	58	21829	1	1	1	1	0.21	Histone H1.1 OS=Homo sapiens GN=HIST1H1A PE=1 SV=3
427	1	UniProt_human	O15234	58	76232	2	2	2	2	0.12	Protein CASC3 OS=Homo sapiens GN=CASC3 PE=1 SV=2
426	1	UniProt_human	K7EPA3	58	50520	2	2	1	1	0.09	Transmembrane protein 161A OS=Homo sapiens GN=TMEM161A PE=1 SV=2
430	1	UniProt_human	Q14146	58	170435	3	3	3	3	0.08	Unhealthy ribosome biogenesis protein 2 homolog OS=Homo sapiens GN=URB2 PE=2 SV=2
432	1	UniProt_human	Q9Y4E8	58	112348	2	2	2	2	0.08	Ubiquitin carboxyl-terminal hydrolase 15 OS=Homo sapiens GN=USP15 PE=1 SV=3
428	1	UniProt_human	A0A0G2JH68	58	141269	2	2	2	2	0.06	Protein diaphanous homolog 1 OS=Homo sapiens GN=DIAPH1 PE=1 SV=1
400	2	UniProt_human	Q14315	58	290841	2	2	2	2	0.03	Filamin-C OS=Homo sapiens GN=FLNC PE=1 SV=3
433	1	UniProt_human	Q7Z2Z2	58	125350	1	1	1	1	0.03	Elongation factor-like GTPase 1 OS=Homo sapiens GN=EFL1 PE=1 SV=2
435	1	UniProt_human	J3KRD0	57	28420	1	1	1	1	0.16	Archaemetzincin-2 (Fragment) OS=Homo sapiens GN=AMZ2 PE=1 SV=1
437	1	UniProt_human	A0A087WTS8	57	52566	1	1	1	1	0.08	Heat shock 70 kDa protein 4 OS=Homo sapiens GN=HSPA4 PE=1 SV=1
434	1	UniProt_human	G5E9C8	57	150762	2	2	2	2	0.06	Son of sevenless homolog 1 OS=Homo sapiens GN=SOS1 PE=1 SV=1
439	1	UniProt_human	P52756	57	92097	1	1	1	1	0.05	RNA-binding protein 5 OS=Homo sapiens GN=RBM5 PE=1 SV=2
436	1	UniProt_human	J3KQ96	57	144040	1	1	1	1	0.03	Treacle protein (Fragment) OS=Homo sapiens GN=TCOF1 PE=1 SV=1
438	1	UniProt_human	A0A087WU64	57	165663	1	1	1	1	0.03	DNA polymerase OS=Homo sapiens GN=POLA1 PE=1 SV=1
443	1	UniProt_human	H0YM92	56	34303	1	1	1	1	0.13	Low-density lipoprotein receptor (Fragment) OS=Homo sapiens GN=LDLR PE=1 SV=1
441	1	UniProt_human	P11166	56	54049	2	2	1	1	0.08	Solute carrier family 2, facilitated glucose transporter member 1 OS=Homo sapiens GN=SLC2A1 PE=1 SV=2
440	1	UniProt_human	H7C1W1	56	79817	1	1	1	1	0.05	Peroxidasin homolog (Fragment) OS=Homo sapiens GN=PXDN PE=1 SV=1
444	1	UniProt_human	Q2M3G4	56	90730	2	2	1	1	0.05	Protein Shroom1 OS=Homo sapiens GN=SHROOM1 PE=1 SV=1
446	1	UniProt_human	Q5SR54	56	87985	1	1	1	1	0.05	Calsyntenin-1 (Fragment) OS=Homo sapiens GN=CLSTN1 PE=1 SV=1
445	1	UniProt_human	A0A1B0GWE0	56	139523	1	1	1	1	0.03	Dedicator of cytokinesis protein 7 (Fragment) OS=Homo sapiens GN=DOCK7 PE=4 SV=1
442	1	UniProt_human	A0A087WWE2	56	218067	1	1	1	1	0.02	DNA-directed RNA polymerase subunit OS=Homo sapiens GN=POLR2A PE=1 SV=1
451	1	UniProt_human	A0A075B785	55	112643	3	3	3	3	0.12	LisH domain and HEAT repeat-containing protein KIAA1468 OS=Homo sapiens GN=KIAA1468 PE=1 SV=7
449	1	UniProt_human	O14802	55	155542	3	3	3	3	0.09	DNA-directed RNA polymerase III subunit RPC1 OS=Homo sapiens GN=POLR3A PE=1 SV=2
450	1	UniProt_human	F8W785	55	78713	1	1	1	1	0.06	Golgi integral membrane protein 4 OS=Homo sapiens GN=GOLIM4 PE=1 SV=1
447	1	UniProt_human	I3L2C7	55	118745	1	1	1	1	0.04	Gem-associated protein 4 OS=Homo sapiens GN=GEMIN4 PE=1 SV=1
448	1	UniProt_human	Q9NRP7	55	143903	1	1	1	1	0.03	Serine/threonine-protein kinase 36 OS=Homo sapiens GN=STK36 PE=1 SV=2
457	1	UniProt_human	A0A075B6P5	54	12948	1	1	1	1	0.37	Protein IGKV2-28 (Fragment) OS=Homo sapiens GN=IGKV2D-28 PE=1 SV=1
461	1	UniProt_human	P12273	54	16562	1	1	1	1	0.29	Prolactin-inducible protein OS=Homo sapiens GN=PIP PE=1 SV=1
452	1	UniProt_human	H3BM89	54	37633	2	2	2	2	0.25	60S ribosomal protein L4 OS=Homo sapiens GN=RPL4 PE=1 SV=1
456	1	UniProt_human	A0A087WZS7	54	26373	1	1	1	1	0.17	Synergin gamma (Fragment) OS=Homo sapiens GN=SYNRG PE=1 SV=1
458	1	UniProt_human	B0QZ65	54	56426	1	1	1	1	0.08	GTPase-activating protein and VPS9 domain-containing protein 1 OS=Homo sapiens GN=GAPVD1 PE=1 SV=1
463	1	UniProt_human	P19838	54	105290	2	2	2	2	0.08	Nuclear factor NF-kappa-B p105 subunit OS=Homo sapiens GN=NFKB1 PE=1 SV=2
454	1	UniProt_human	Q9P2R3	54	128318	2	2	2	2	0.07	Rabankyrin-5 OS=Homo sapiens GN=ANKFY1 PE=1 SV=2
459	1	UniProt_human	P23246	54	76102	1	1	1	1	0.06	Splicing factor, proline- and glutamine-rich OS=Homo sapiens GN=SFPQ PE=1 SV=2
460	1	UniProt_human	A0A0A0MSW3	54	152475	2	2	2	2	0.06	Nuclear pore complex protein Nup214 OS=Homo sapiens GN=NUP214 PE=1 SV=1
455	1	UniProt_human	P38435	54	87505	1	1	1	1	0.05	Vitamin K-dependent gamma-carboxylase OS=Homo sapiens GN=GGCX PE=1 SV=2
464	1	UniProt_human	J3KNZ9	54	103706	1	1	1	1	0.04	Probable fibrosin-1 OS=Homo sapiens GN=FBRS PE=1 SV=1
465	1	UniProt_human	I3L0J9	54	119625	1	1	1	1	0.04	Pre-mRNA-processing-splicing factor 8 (Fragment) OS=Homo sapiens GN=PRPF8 PE=1 SV=8
466	1	UniProt_human	O94898	54	118890	1	1	1	1	0.04	Leucine-rich repeats and immunoglobulin-like domains protein 2 OS=Homo sapiens GN=LRIG2 PE=2 SV=3
462	1	UniProt_human	A0A0A0MRF9	54	145967	1	1	1	1	0.03	Phosphoinositide phospholipase C OS=Homo sapiens GN=PLCG2 PE=1 SV=1
468	1	UniProt_human	P10599	53	11730	1	1	1	1	0.42	Thioredoxin OS=Homo sapiens GN=TXN PE=1 SV=3
469	1	UniProt_human	Q5SYF9	53	20619	1	1	1	1	0.22	HAUS augmin-like complex subunit 6 (Fragment) OS=Homo sapiens GN=HAUS6 PE=1 SV=1
471	1	UniProt_human	F6R0L0	53	98918	3	3	2	2	0.09	SUMO-interacting motif-containing protein 1 OS=Homo sapiens GN=SIMC1 PE=1 SV=1
113	4	UniProt_human	Q5VTR2	53	113592	2	2	2	2	0.08	E3 ubiquitin-protein ligase BRE1A OS=Homo sapiens GN=RNF20 PE=1 SV=2
467	1	UniProt_human	F8WAH1	53	80986	1	1	1	1	0.05	Alpha-aminoadipic semialdehyde synthase, mitochondrial OS=Homo sapiens GN=AASS PE=1 SV=1
470	1	UniProt_human	A0A0J9YW54	53	96343	1	1	1	1	0.05	Ral GTPase-activating protein subunit beta (Fragment) OS=Homo sapiens GN=RALGAPB PE=1 SV=1
472	1	UniProt_human	Q9H501	53	98735	1	1	1	1	0.04	ESF1 homolog OS=Homo sapiens GN=ESF1 PE=1 SV=1
477	1	UniProt_human	H0YHL6	52	8755	1	1	1	1	0.59	Methionine--tRNA ligase, cytoplasmic (Fragment) OS=Homo sapiens GN=MARS PE=1 SV=1
476	1	UniProt_human	I3L1U9	52	23830	1	1	1	1	0.19	Actin, cytoplasmic 2 (Fragment) OS=Homo sapiens GN=ACTG1 PE=1 SV=1
473	1	UniProt_human	P03886	52	35637	1	1	1	1	0.13	NADH-ubiquinone oxidoreductase chain 1 OS=Homo sapiens GN=MT-ND1 PE=1 SV=1
475	1	UniProt_human	H0Y507	52	116408	1	1	1	1	0.04	SH3 and PX domain-containing protein 2A (Fragment) OS=Homo sapiens GN=SH3PXD2A PE=1 SV=1
478	1	UniProt_human	H0Y9K5	52	102359	1	1	1	1	0.04	Adhesion G protein-coupled receptor L3 (Fragment) OS=Homo sapiens GN=ADGRL3 PE=1 SV=1
479	1	UniProt_human	Q96RS0	52	96560	1	1	1	1	0.04	Trimethylguanosine synthase OS=Homo sapiens GN=TGS1 PE=1 SV=3
474	1	UniProt_human	Q14678	52	147197	1	1	1	1	0.03	KN motif and ankyrin repeat domain-containing protein 1 OS=Homo sapiens GN=KANK1 PE=1 SV=3
453	1	UniProt_human	E9PJA7	51	52886	2	2	2	2	0.17	Bcl-2-associated transcription factor 1 OS=Homo sapiens GN=BCLAF1 PE=1 SV=1
481	1	UniProt_human	G3XAN4	51	33414	1	1	1	1	0.13	Translocating chain-associated membrane protein 1 OS=Homo sapiens GN=TRAM1 PE=1 SV=1
483	1	UniProt_human	A0A087WU53	51	41504	1	1	1	1	0.11	Magnesium transporter protein 1 OS=Homo sapiens GN=MAGT1 PE=1 SV=1
482	1	UniProt_human	H0Y5G9	51	61797	1	1	1	1	0.07	Nardilysin (Fragment) OS=Homo sapiens GN=NRDC PE=1 SV=1
480	1	UniProt_human	Q86YZ3	51	282228	1	1	1	1	0.02	Hornerin OS=Homo sapiens GN=HRNR PE=1 SV=2
487	1	UniProt_human	G3V529	50	91424	1	1	1	1	0.05	ATP-dependent RNA helicase DDX24 OS=Homo sapiens GN=DDX24 PE=1 SV=1
485	1	UniProt_human	P22102	50	107699	1	1	1	1	0.04	Trifunctional purine biosynthetic protein adenosine-3 OS=Homo sapiens GN=GART PE=1 SV=1
484	1	UniProt_human	A0A087WZV0	50	144271	1	1	1	1	0.03	Inositol hexakisphosphate and diphosphoinositol-pentakisphosphate kinase 2 OS=Homo sapiens GN=PPIP5K2 PE=1 SV=1
486	1	UniProt_human	J3KNE0	50	197499	1	1	1	1	0.02	RanBP2-like and GRIP domain-containing protein 3 OS=Homo sapiens GN=RGPD3 PE=4 SV=2
488	1	UniProt_human	Q96N66	49	52730	1	1	1	1	0.08	Lysophospholipid acyltransferase 7 OS=Homo sapiens GN=MBOAT7 PE=1 SV=2
491	1	UniProt_human	Q96JH8	49	117381	2	2	2	2	0.08	Ras-associating and dilute domain-containing protein OS=Homo sapiens GN=RADIL PE=1 SV=5
489	1	UniProt_human	M0R165	49	83424	1	1	1	1	0.05	Epidermal growth factor receptor substrate 15-like 1 OS=Homo sapiens GN=EPS15L1 PE=1 SV=1
490	1	UniProt_human	A0A0A0MRM8	49	144924	1	1	1	1	0.03	Unconventional myosin-VI OS=Homo sapiens GN=MYO6 PE=1 SV=1
503	1	UniProt_human	H0YHA7	48	18962	1	1	1	1	0.25	60S ribosomal protein L18 (Fragment) OS=Homo sapiens GN=RPL18 PE=1 SV=1
497	1	UniProt_human	H7C4Y5	48	19499	1	1	1	1	0.24	Centrosomal protein of 97 kDa (Fragment) OS=Homo sapiens GN=CEP97 PE=1 SV=1
499	1	UniProt_human	H7C2G2	48	31491	1	1	1	1	0.14	NAD(P)(+)--arginine ADP-ribosyltransferase (Fragment) OS=Homo sapiens GN=ART4 PE=1 SV=1
494	1	UniProt_human	A0A087X1U1	48	82638	1	1	1	1	0.05	Arf-GAP with GTPase, ANK repeat and PH domain-containing protein 1 OS=Homo sapiens GN=AGAP1 PE=1 SV=1
495	1	UniProt_human	H0Y894	48	88729	1	1	1	1	0.05	Mitogen-activated protein kinase kinase kinase 6 (Fragment) OS=Homo sapiens GN=MAP3K6 PE=1 SV=1
496	1	UniProt_human	Q9H3S7	48	178861	2	2	2	2	0.05	Tyrosine-protein phosphatase non-receptor type 23 OS=Homo sapiens GN=PTPN23 PE=1 SV=1
498	1	UniProt_human	Q1KMD3	48	85052	1	1	1	1	0.05	Heterogeneous nuclear ribonucleoprotein U-like protein 2 OS=Homo sapiens GN=HNRNPUL2 PE=1 SV=1
493	1	UniProt_human	H0Y3N9	48	105901	1	1	1	1	0.04	Histone lysine demethylase PHF8 (Fragment) OS=Homo sapiens GN=PHF8 PE=1 SV=1
500	1	UniProt_human	H0Y612	48	98940	1	1	1	1	0.04	E3 ubiquitin-protein ligase TRIM33 (Fragment) OS=Homo sapiens GN=TRIM33 PE=1 SV=1
492	1	UniProt_human	E2QRD4	48	137415	1	1	1	1	0.03	Protein MMS22-like OS=Homo sapiens GN=MMS22L PE=1 SV=1
502	1	UniProt_human	P98198	48	137352	1	1	1	1	0.03	Phospholipid-transporting ATPase ID OS=Homo sapiens GN=ATP8B2 PE=1 SV=2
501	1	UniProt_human	Q8IWV8	48	200408	1	1	1	1	0.02	E3 ubiquitin-protein ligase UBR2 OS=Homo sapiens GN=UBR2 PE=1 SV=1
513	1	UniProt_human	B0YIW2	47	12807	1	1	1	1	0.38	Apolipoprotein C-III OS=Homo sapiens GN=APOC3 PE=1 SV=1
506	1	UniProt_human	A0A075B7B2	47	17086	1	1	1	1	0.28	Tetratricopeptide repeat protein 17 (Fragment) OS=Homo sapiens GN=TTC17 PE=1 SV=1
512	1	UniProt_human	Q4VB86	47	69847	2	2	2	2	0.13	EPB41 protein OS=Homo sapiens GN=EPB41 PE=1 SV=2
508	1	UniProt_human	Q8N1N4	47	56830	1	1	1	1	0.08	Keratin, type II cytoskeletal 78 OS=Homo sapiens GN=KRT78 PE=2 SV=2
509	1	UniProt_human	Q5FWF4	47	123170	2	2	2	2	0.07	DNA annealing helicase and endonuclease ZRANB3 OS=Homo sapiens GN=ZRANB3 PE=1 SV=2
504	1	UniProt_human	Q9P206	47	107030	1	1	1	1	0.04	Uncharacterized protein KIAA1522 OS=Homo sapiens GN=KIAA1522 PE=1 SV=2
505	1	UniProt_human	P14735	47	117893	1	1	1	1	0.04	Insulin-degrading enzyme OS=Homo sapiens GN=IDE PE=1 SV=4
507	1	UniProt_human	A0AVT1	47	117895	1	1	1	1	0.04	Ubiquitin-like modifier-activating enzyme 6 OS=Homo sapiens GN=UBA6 PE=1 SV=1
510	1	UniProt_human	Q86YS7	47	110377	1	1	1	1	0.04	C2 domain-containing protein 5 OS=Homo sapiens GN=C2CD5 PE=1 SV=1
511	1	UniProt_human	A0A0A0MSK6	47	171576	1	1	1	1	0.03	Rho GTPase-activating protein 5 OS=Homo sapiens GN=ARHGAP5 PE=1 SV=1
520	1	UniProt_human	H3BNF4	46	5192	1	1	1	1	1.13	Transcription factor 12 (Fragment) OS=Homo sapiens GN=TCF12 PE=1 SV=1
519	1	UniProt_human	P62805	46	11360	1	1	1	1	0.44	Histone H4 OS=Homo sapiens GN=HIST1H4A PE=1 SV=2
514	1	UniProt_human	P42684	46	128263	2	2	2	2	0.07	Abelson tyrosine-protein kinase 2 OS=Homo sapiens GN=ABL2 PE=1 SV=1
515	1	UniProt_human	Q5SVZ6	46	128633	2	2	2	2	0.07	Zinc finger MYM-type protein 1 OS=Homo sapiens GN=ZMYM1 PE=1 SV=1
517	1	UniProt_human	A0A087WTJ9	46	123989	2	2	2	2	0.07	E3 ubiquitin-protein ligase UBR1 OS=Homo sapiens GN=UBR1 PE=1 SV=1
518	1	UniProt_human	A0A0A0MR87	46	137743	1	1	1	1	0.03	SCL-interrupting locus protein OS=Homo sapiens GN=STIL PE=1 SV=1
516	1	UniProt_human	Q8NG31	46	265224	1	1	1	1	0.02	Protein CASC5 OS=Homo sapiens GN=CASC5 PE=1 SV=3
522	1	UniProt_human	Q86X91	45	50414	1	1	1	1	0.09	Inactive tyrosine-protein kinase 7 OS=Homo sapiens GN=PTK7 PE=1 SV=1
521	1	UniProt_human	A0A087WT87	45	54173	1	1	1	1	0.08	Amino acid transporter OS=Homo sapiens GN=SLC1A3 PE=1 SV=1
525	1	UniProt_human	Q08554	45	99924	1	1	1	1	0.04	Desmocollin-1 OS=Homo sapiens GN=DSC1 PE=1 SV=2
524	1	UniProt_human	Q13625	45	125538	1	1	1	1	0.03	Apoptosis-stimulating of p53 protein 2 OS=Homo sapiens GN=TP53BP2 PE=1 SV=2
523	1	UniProt_human	A0A1B0GU24	45	202597	1	1	1	1	0.02	Trinucleotide repeat-containing gene 6C protein OS=Homo sapiens GN=TNRC6C PE=4 SV=1
533	1	UniProt_human	K7EPS6	44	16794	1	1	1	1	0.28	Hepatoma-derived growth factor-related protein 2 (Fragment) OS=Homo sapiens GN=HDGFRP2 PE=1 SV=2
526	1	UniProt_human	Q9ULH1	44	125420	3	3	3	3	0.11	Arf-GAP with SH3 domain, ANK repeat and PH domain-containing protein 1 OS=Homo sapiens GN=ASAP1 PE=1 SV=4
529	1	UniProt_human	Q9H0M0	44	105136	3	3	2	2	0.08	NEDD4-like E3 ubiquitin-protein ligase WWP1 OS=Homo sapiens GN=WWP1 PE=1 SV=1
527	1	UniProt_human	O15397	44	119861	2	2	2	2	0.07	Importin-8 OS=Homo sapiens GN=IPO8 PE=1 SV=2
528	1	UniProt_human	Q6P1N0	44	103998	1	1	1	1	0.04	Coiled-coil and C2 domain-containing protein 1A OS=Homo sapiens GN=CC2D1A PE=1 SV=1
530	1	UniProt_human	A0A0A0MST8	44	134484	1	1	1	1	0.03	Anion exchange protein OS=Homo sapiens GN=SLC4A7 PE=1 SV=1
531	1	UniProt_human	Q2M1P5	44	150495	1	1	1	1	0.03	Kinesin-like protein KIF7 OS=Homo sapiens GN=KIF7 PE=1 SV=2
534	1	UniProt_human	Q16706	44	131057	1	1	1	1	0.03	Alpha-mannosidase 2 OS=Homo sapiens GN=MAN2A1 PE=1 SV=2
535	1	UniProt_human	A0A096LPA6	43	25422	2	2	2	2	0.39	Ran-binding protein 6 (Fragment) OS=Homo sapiens GN=RANBP6 PE=1 SV=1
532	1	UniProt_human	O94910	43	162614	2	2	2	2	0.05	Adhesion G protein-coupled receptor L1 OS=Homo sapiens GN=ADGRL1 PE=1 SV=1
536	1	UniProt_human	Q13905	42	120472	3	3	3	3	0.11	Rap guanine nucleotide exchange factor 1 OS=Homo sapiens GN=RAPGEF1 PE=1 SV=3
542	1	UniProt_human	A0A0A6YYJ8	42	54191	1	1	1	1	0.08	Putative RNA-binding protein Luc7-like 2 OS=Homo sapiens GN=LUC7L2 PE=4 SV=1
537	1	UniProt_human	Q96RY7-2	42	75524	1	1	1	1	0.06	Isoform 2 of Intraflagellar transport protein 140 homolog OS=Homo sapiens GN=IFT140
540	1	UniProt_human	G5EA31	42	111914	1	1	1	1	0.04	Protein transport protein Sec24C OS=Homo sapiens GN=SEC24C PE=1 SV=1
541	1	UniProt_human	P35606	42	102422	1	1	1	1	0.04	Coatomer subunit beta' OS=Homo sapiens GN=COPB2 PE=1 SV=2
538	1	UniProt_human	H0Y3H2	42	184746	1	1	1	1	0.02	ATP-binding cassette sub-family A member 3 OS=Homo sapiens GN=ABCA3 PE=1 SV=1
539	1	UniProt_human	Q92538	42	206315	1	1	1	1	0.02	Golgi-specific brefeldin A-resistance guanine nucleotide exchange factor 1 OS=Homo sapiens GN=GBF1 PE=1 SV=2
545	1	UniProt_human	E7EQG2	41	41264	1	1	1	1	0.11	Eukaryotic initiation factor 4A-II OS=Homo sapiens GN=EIF4A2 PE=1 SV=1
546	1	UniProt_human	A0A087WWL5	41	101618	1	1	1	1	0.04	Uncharacterized protein C19orf68 OS=Homo sapiens GN=C19orf68 PE=1 SV=1
548	1	UniProt_human	F8W1F5	41	117010	1	1	1	1	0.04	Formin-like protein 3 OS=Homo sapiens GN=FMNL3 PE=1 SV=1
543	1	UniProt_human	Q05GC8	41	134225	1	1	1	1	0.03	Breast cancer anti-estrogen resistance 2 OS=Homo sapiens GN=BCAR2 PE=1 SV=1
544	1	UniProt_human	A0A087WTD7	41	161084	1	1	1	1	0.03	A-kinase anchor protein 13 OS=Homo sapiens GN=AKAP13 PE=1 SV=1
547	1	UniProt_human	Q9NTI5	41	164563	1	1	1	1	0.03	Sister chromatid cohesion protein PDS5 homolog B OS=Homo sapiens GN=PDS5B PE=1 SV=1
550	1	UniProt_human	Q9HAU5	40	147717	2	2	2	2	0.06	Regulator of nonsense transcripts 2 OS=Homo sapiens GN=UPF2 PE=1 SV=1
551	1	UniProt_human	Q96PD2	40	84981	1	1	1	1	0.05	Discoidin, CUB and LCCL domain-containing protein 2 OS=Homo sapiens GN=DCBLD2 PE=1 SV=1
549	1	UniProt_human	O75420	40	114531	1	1	1	1	0.04	PERQ amino acid-rich with GYF domain-containing protein 1 OS=Homo sapiens GN=GIGYF1 PE=1 SV=2
554	1	UniProt_human	E9PJD9	39	10121	1	1	1	1	0.5	60S ribosomal protein L27a OS=Homo sapiens GN=RPL27A PE=1 SV=1
552	1	UniProt_human	H3BRK9	39	32748	1	1	1	1	0.14	E3 ubiquitin-protein ligase AMFR (Fragment) OS=Homo sapiens GN=AMFR PE=1 SV=1
553	1	UniProt_human	P49790	39	153843	1	1	1	1	0.03	Nuclear pore complex protein Nup153 OS=Homo sapiens GN=NUP153 PE=1 SV=2
556	1	UniProt_human	Q8IXQ8	38	29886	1	1	1	1	0.15	PDZ domain-containing protein 9 OS=Homo sapiens GN=PDZD9 PE=2 SV=2
555	1	UniProt_human	Q5VZU9	38	139677	2	2	2	2	0.06	Tripeptidyl-peptidase 2 OS=Homo sapiens GN=TPP2 PE=1 SV=1
557	1	UniProt_human	M0R0P8	38	243248	1	1	1	1	0.02	Unconventional myosin-IXb OS=Homo sapiens GN=MYO9B PE=1 SV=1
558	1	UniProt_human	C9JNW5	37	17532	1	1	1	1	0.27	60S ribosomal protein L24 OS=Homo sapiens GN=RPL24 PE=1 SV=1
559	1	UniProt_human	C9JVY5	37	85231	1	1	1	1	0.05	A-kinase anchor protein 2 (Fragment) OS=Homo sapiens GN=AKAP2 PE=1 SV=1
560	1	UniProt_human	F5H793	36	10800	1	1	1	1	0.46	L-lactate dehydrogenase B chain (Fragment) OS=Homo sapiens GN=LDHB PE=1 SV=1
563	1	UniProt_human	C9J826	36	30186	1	1	1	1	0.15	Junction plakoglobin (Fragment) OS=Homo sapiens GN=JUP PE=1 SV=8
561	1	UniProt_human	Q5M9Q1	36	46284	1	1	1	1	0.1	NKAP-like protein OS=Homo sapiens GN=NKAPL PE=2 SV=3
562	1	UniProt_human	E7EWM1	36	102664	2	2	2	2	0.09	Nuclear receptor coactivator 2 OS=Homo sapiens GN=NCOA2 PE=1 SV=2
566	1	UniProt_human	A0A075B6N8	35	41300	1	1	1	1	0.11	Ig gamma-3 chain C region (Fragment) OS=Homo sapiens GN=IGHG3 PE=1 SV=1
565	1	UniProt_human	Q6P1M0	35	72018	1	1	1	1	0.06	Long-chain fatty acid transport protein 4 OS=Homo sapiens GN=SLC27A4 PE=1 SV=1
564	1	UniProt_human	Q14008	35	225352	1	1	1	1	0.02	Cytoskeleton-associated protein 5 OS=Homo sapiens GN=CKAP5 PE=1 SV=3
568	1	UniProt_human	H7BZK5	34	13163	1	1	1	1	0.37	Gamma-glutamylcyclotransferase (Fragment) OS=Homo sapiens GN=GGCT PE=1 SV=1
567	1	UniProt_human	J3KTD7	34	30070	1	1	1	1	0.15	Protein SMG8 (Fragment) OS=Homo sapiens GN=SMG8 PE=1 SV=1
569	1	UniProt_human	F5H2F4	34	110544	1	1	1	1	0.04	C-1-tetrahydrofolate synthase, cytoplasmic OS=Homo sapiens GN=MTHFD1 PE=1 SV=1
571	1	UniProt_human	D6RBL0	33	8106	1	1	1	1	0.65	Transmembrane protein 165 OS=Homo sapiens GN=TMEM165 PE=1 SV=1
572	1	UniProt_human	A0A0C4DGG8	33	120351	1	1	1	1	0.04	Cell division cycle and apoptosis regulator protein 1 (Fragment) OS=Homo sapiens GN=CCAR1 PE=1 SV=1
570	1	UniProt_human	A0A0D9SEY1	33	150991	1	1	1	1	0.03	Mitogen-activated protein kinase kinase kinase kinase 4 OS=Homo sapiens GN=MAP4K4 PE=1 SV=1
573	1	UniProt_human	A0A0B4J1Z1	30	15753	1	1	1	1	0.3	Serine/arginine-rich-splicing factor 7 OS=Homo sapiens GN=SRSF7 PE=1 SV=1
