# Supplementary material for: FER-mediated phosphorylation and PIK3R2 recruitment on IRS4 promotes AKT activation and tumorigenesis in ovarian cancer cells
Source: eLife. 2022 May 12;11:e76183. doi: 10.7554/eLife.76183 (PMC9098222; doi:10.7554/eLife.76183)
Supplement: Supplementary file 6. — Potential FER interactome above 150 kDa is shown in this file. [file elife-76183-supp6.xlsx]

## Sheet: Chris_150_top_results
Database	UniProt_human 20161004
Type of search	MS/MS Ion Search
Enzyme	Trypsin
Variable modifications	Deamidated (NQ),Oxidation (M),Phospho (ST),Phospho (Y)
Mass values	Monoisotopic
Protein mass	Unrestricted
Peptide mass tolerance	30 ppm
Fragment mass tolerance	0.3 Da
Max missed cleavages	1
Instrument type	ESI-QUAD
Number of queries	48725
Significance threshold p<	0.005751
Max. number of families	AUTO
Ions score or expect cut-off	0.005751
Preferred taxonomy	All entries
Show Percolator scores?	no
Family	Member	Database	Accession	Score	Mass	Num. of matches	Num. of significant matches	Num. of sequences	Num. of significant sequences	emPAI	Description
1	1	UniProt_human	P78527	13728	468788	509	509	139	139	2.8	DNA-dependent protein kinase catalytic subunit OS=Homo sapiens GN=PRKDC PE=1 SV=3
2	1	UniProt_human	P27708	12083	242829	448	448	74	74	3.13	CAD protein OS=Homo sapiens GN=CAD PE=1 SV=3
3	1	UniProt_human	P46821	9431	270468	336	336	80	80	3.38	Microtubule-associated protein 1B OS=Homo sapiens GN=MAP1B PE=1 SV=2
4	1	UniProt_human	Q14315	7650	290841	290	290	89	89	2.84	Filamin-C OS=Homo sapiens GN=FLNC PE=1 SV=3
5	1	UniProt_human	Q14204	7396	532072	353	353	151	151	2.46	Cytoplasmic dynein 1 heavy chain 1 OS=Homo sapiens GN=DYNC1H1 PE=1 SV=5
4	2	UniProt_human	P21333	7083	280564	247	247	84	84	2.74	Filamin-A OS=Homo sapiens GN=FLNA PE=1 SV=4
6	1	UniProt_human	Q92616	6664	292572	255	255	95	95	3.22	eIF-2-alpha kinase activator GCN1 OS=Homo sapiens GN=GCN1 PE=1 SV=6
7	1	UniProt_human	P15924	6600	331569	265	265	104	104	2.95	Desmoplakin OS=Homo sapiens GN=DSP PE=1 SV=3
8	1	UniProt_human	Q01082	5883	274439	232	232	97	97	3.71	Spectrin beta chain, non-erythrocytic 1 OS=Homo sapiens GN=SPTBN1 PE=1 SV=2
9	1	UniProt_human	Q13813	5731	284364	227	227	107	107	4.1	Spectrin alpha chain, non-erythrocytic 1 OS=Homo sapiens GN=SPTAN1 PE=1 SV=3
10	1	UniProt_human	O75643	5502	244353	216	216	67	67	2.38	U5 small nuclear ribonucleoprotein 200 kDa helicase OS=Homo sapiens GN=SNRNP200 PE=1 SV=2
11	1	UniProt_human	P35908	4874	65393	141	141	41	41	17.41	Keratin, type II cytoskeletal 2 epidermal OS=Homo sapiens GN=KRT2 PE=1 SV=2
12	1	UniProt_human	P13645	4745	58792	155	155	30	30	21.01	Keratin, type I cytoskeletal 10 OS=Homo sapiens GN=KRT10 PE=1 SV=6
13	1	UniProt_human	J3KNL6	4239	251738	168	168	53	53	1.53	Protein transport protein Sec16A OS=Homo sapiens GN=SEC16A PE=1 SV=1
11	2	UniProt_human	P04264	4108	65999	140	140	35	35	18.07	Keratin, type II cytoskeletal 1 OS=Homo sapiens GN=KRT1 PE=1 SV=6
13	2	UniProt_human	O15027-5	3971	235607	155	155	50	50	1.56	Isoform 5 of Protein transport protein Sec16A OS=Homo sapiens GN=SEC16A
14	1	UniProt_human	P35527	3826	62027	115	115	29	29	8.49	Keratin, type I cytoskeletal 9 OS=Homo sapiens GN=KRT9 PE=1 SV=3
15	1	UniProt_human	P49327	3782	273254	164	164	65	65	1.88	Fatty acid synthase OS=Homo sapiens GN=FASN PE=1 SV=3
16	1	UniProt_human	Q6P2Q9	3413	273427	172	172	74	74	2.36	Pre-mRNA-processing-splicing factor 8 OS=Homo sapiens GN=PRPF8 PE=1 SV=2
4	3	UniProt_human	O75369	3402	277990	155	155	75	75	2.15	Filamin-B OS=Homo sapiens GN=FLNB PE=1 SV=2
17	1	UniProt_human	P42694	3296	218833	138	138	53	53	1.97	Probable helicase with zinc finger domain OS=Homo sapiens GN=HELZ PE=1 SV=2
18	1	UniProt_human	P35579	3010	226392	101	101	47	47	1.42	Myosin-9 OS=Homo sapiens GN=MYH9 PE=1 SV=4
19	1	UniProt_human	Q92621	2829	227776	130	130	50	50	1.54	Nuclear pore complex protein Nup205 OS=Homo sapiens GN=NUP205 PE=1 SV=3
20	1	UniProt_human	O95071	2734	309158	102	102	46	46	0.94	E3 ubiquitin-protein ligase UBR5 OS=Homo sapiens GN=UBR5 PE=1 SV=2
21	1	UniProt_human	A0A087X2H1	2730	289451	99	99	42	42	0.88	E3 ubiquitin-protein ligase HECTD1 OS=Homo sapiens GN=HECTD1 PE=1 SV=1
22	1	UniProt_human	A5YKK6	2451	266768	124	124	52	52	1.29	CCR4-NOT transcription complex subunit 1 OS=Homo sapiens GN=CNOT1 PE=1 SV=2
23	1	UniProt_human	Q9H583	2230	242215	89	89	44	44	1.2	HEAT repeat-containing protein 1 OS=Homo sapiens GN=HEATR1 PE=1 SV=3
24	1	UniProt_human	Q96N67-2	2227	241260	95	95	49	49	1.37	Isoform 2 of Dedicator of cytokinesis protein 7 OS=Homo sapiens GN=DOCK7
25	1	UniProt_human	A0A087WW06	2054	256707	80	80	46	46	1.14	Tetratricopeptide repeat protein 28 OS=Homo sapiens GN=TTC28 PE=1 SV=1
26	1	UniProt_human	Q93008	2042	292094	96	96	42	42	0.9	Probable ubiquitin carboxyl-terminal hydrolase FAF-X OS=Homo sapiens GN=USP9X PE=1 SV=3
27	1	UniProt_human	P02751	2025	262460	71	71	25	25	0.5	Fibronectin OS=Homo sapiens GN=FN1 PE=1 SV=4
28	1	UniProt_human	O60271-4	2009	144592	72	72	36	36	1.88	Isoform 4 of C-Jun-amino-terminal kinase-interacting protein 4 OS=Homo sapiens GN=SPAG9
18	2	UniProt_human	P35580	1996	228858	72	72	43	43	1.22	Myosin-10 OS=Homo sapiens GN=MYH10 PE=1 SV=3
29	1	UniProt_human	Q14152	1975	166468	83	83	35	35	1.44	Eukaryotic translation initiation factor 3 subunit A OS=Homo sapiens GN=EIF3A PE=1 SV=1
28	2	UniProt_human	O60271	1963	146115	72	72	36	36	1.85	C-Jun-amino-terminal kinase-interacting protein 4 OS=Homo sapiens GN=SPAG9 PE=1 SV=4
30	1	UniProt_human	O75592	1888	509759	89	89	55	55	0.58	E3 ubiquitin-protein ligase MYCBP2 OS=Homo sapiens GN=MYCBP2 PE=1 SV=3
31	1	UniProt_human	A0A087WVQ6	1665	191936	74	74	38	38	1.42	Clathrin heavy chain OS=Homo sapiens GN=CLTC PE=1 SV=1
32	1	UniProt_human	Q9UPY3	1597	218542	68	68	35	35	1.01	Endoribonuclease Dicer OS=Homo sapiens GN=DICER1 PE=1 SV=3
33	1	UniProt_human	P46939	1592	394220	67	67	48	48	0.68	Utrophin OS=Homo sapiens GN=UTRN PE=1 SV=2
12	2	UniProt_human	P02533	1582	51529	55	55	19	19	5.08	Keratin, type I cytoskeletal 14 OS=Homo sapiens GN=KRT14 PE=1 SV=4
34	1	UniProt_human	P24928	1569	217039	62	62	31	31	0.84	DNA-directed RNA polymerase II subunit RPB1 OS=Homo sapiens GN=POLR2A PE=1 SV=2
35	1	UniProt_human	Q13085	1560	265385	78	78	43	43	1.02	Acetyl-CoA carboxylase 1 OS=Homo sapiens GN=ACACA PE=1 SV=2
36	1	UniProt_human	A0A087X0K9	1512	187734	66	66	33	33	1.21	Tight junction protein ZO-1 OS=Homo sapiens GN=TJP1 PE=1 SV=1
37	1	UniProt_human	Q9H3S7	1468	178861	58	58	28	28	0.95	Tyrosine-protein phosphatase non-receptor type 23 OS=Homo sapiens GN=PTPN23 PE=1 SV=1
38	1	UniProt_human	Q8TEM1	1456	204983	58	58	29	29	0.82	Nuclear pore membrane glycoprotein 210 OS=Homo sapiens GN=NUP210 PE=1 SV=3
39	1	UniProt_human	P05023-3	1358	109480	46	46	19	19	1.17	Isoform 3 of Sodium/potassium-transporting ATPase subunit alpha-1 OS=Homo sapiens GN=ATP1A1
40	1	UniProt_human	O15013	1331	151516	56	56	25	25	1.02	Rho guanine nucleotide exchange factor 10 OS=Homo sapiens GN=ARHGEF10 PE=1 SV=4
41	1	UniProt_human	A8MQ02	1312	201680	47	47	26	26	0.73	Protein AFDN OS=Homo sapiens GN=AFDN PE=1 SV=2
41	2	UniProt_human	P55196-3	1306	197531	47	47	27	27	0.79	Isoform 3 of Afadin OS=Homo sapiens GN=MLLT4
42	1	UniProt_human	P42356	1294	236678	50	50	30	30	0.71	Phosphatidylinositol 4-kinase alpha OS=Homo sapiens GN=PI4KA PE=1 SV=4
43	1	UniProt_human	P12270	1178	267131	50	50	32	32	0.66	Nucleoprotein TPR OS=Homo sapiens GN=TPR PE=1 SV=3
44	1	UniProt_human	P42345	1170	288707	53	53	33	33	0.63	Serine/threonine-protein kinase mTOR OS=Homo sapiens GN=MTOR PE=1 SV=1
45	1	UniProt_human	Q5T4S7	1114	573476	43	43	30	30	0.25	E3 ubiquitin-protein ligase UBR4 OS=Homo sapiens GN=UBR4 PE=1 SV=1
11	3	UniProt_human	P02538	1086	60008	47	47	19	19	3.09	Keratin, type II cytoskeletal 6A OS=Homo sapiens GN=KRT6A PE=1 SV=3
11	4	UniProt_human	P04259	1072	60030	49	49	18	18	3.09	Keratin, type II cytoskeletal 6B OS=Homo sapiens GN=KRT6B PE=1 SV=5
46	1	UniProt_human	Q5JP53	1070	47736	40	40	10	10	1.42	Tubulin beta chain OS=Homo sapiens GN=TUBB PE=1 SV=1
47	1	UniProt_human	E7EUU4	1051	171535	59	59	31	31	1.21	Eukaryotic translation initiation factor 4 gamma 1 OS=Homo sapiens GN=EIF4G1 PE=1 SV=1
46	2	UniProt_human	P68371	1033	49799	38	38	11	11	1.54	Tubulin beta-4B chain OS=Homo sapiens GN=TUBB4B PE=1 SV=1
48	1	UniProt_human	P04626	996	137821	34	34	13	13	0.54	Receptor tyrosine-protein kinase erbB-2 OS=Homo sapiens GN=ERBB2 PE=1 SV=1
49	1	UniProt_human	Q96BY7	963	232616	48	48	27	27	0.64	Autophagy-related protein 2 homolog B OS=Homo sapiens GN=ATG2B PE=1 SV=5
50	1	UniProt_human	P16615	962	114683	31	31	15	15	0.74	Sarcoplasmic/endoplasmic reticulum calcium ATPase 2 OS=Homo sapiens GN=ATP2A2 PE=1 SV=1
51	1	UniProt_human	Q9NU22	958	632420	49	49	34	34	0.26	Midasin OS=Homo sapiens GN=MDN1 PE=1 SV=2
52	1	UniProt_human	Q07864	956	261351	44	44	29	29	0.6	DNA polymerase epsilon catalytic subunit A OS=Homo sapiens GN=POLE PE=1 SV=5
46	3	UniProt_human	A0A0B4J269	937	88324	31	31	7	7	0.4	Uncharacterized protein OS=Homo sapiens PE=1 SV=1
12	3	UniProt_human	P08779	919	51236	34	34	15	15	2.74	Keratin, type I cytoskeletal 16 OS=Homo sapiens GN=KRT16 PE=1 SV=4
53	1	UniProt_human	Q92538	918	206315	51	51	28	28	0.78	Golgi-specific brefeldin A-resistance guanine nucleotide exchange factor 1 OS=Homo sapiens GN=GBF1 PE=1 SV=2
54	1	UniProt_human	A0A0A0MTH9	913	206802	38	38	21	21	0.54	TATA-binding protein-associated factor 172 OS=Homo sapiens GN=BTAF1 PE=1 SV=1
55	1	UniProt_human	P05141	909	32831	51	51	12	12	4.28	ADP/ATP translocase 2 OS=Homo sapiens GN=SLC25A5 PE=1 SV=7
56	1	UniProt_human	A0A087WUT6	897	138597	30	30	14	14	0.58	Eukaryotic translation initiation factor 5B OS=Homo sapiens GN=EIF5B PE=1 SV=1
11	5	UniProt_human	P13647	894	62340	50	50	21	21	3.45	Keratin, type II cytoskeletal 5 OS=Homo sapiens GN=KRT5 PE=1 SV=3
57	1	UniProt_human	P42858	884	347383	37	37	26	26	0.37	Huntingtin OS=Homo sapiens GN=HTT PE=1 SV=2
58	1	UniProt_human	Q14008	884	225352	58	58	33	33	0.86	Cytoskeleton-associated protein 5 OS=Homo sapiens GN=CKAP5 PE=1 SV=3
59	1	UniProt_human	P58107	875	555279	31	31	23	23	0.19	Epiplakin OS=Homo sapiens GN=EPPK1 PE=1 SV=2
60	1	UniProt_human	Q6R327-3	865	194888	45	45	28	28	0.84	Isoform 3 of Rapamycin-insensitive companion of mTOR OS=Homo sapiens GN=RICTOR
61	1	UniProt_human	Q9Y2I1	845	166524	36	36	19	19	0.62	Nischarin OS=Homo sapiens GN=NISCH PE=1 SV=3
62	1	UniProt_human	Q13315	844	350462	26	26	20	20	0.27	Serine-protein kinase ATM OS=Homo sapiens GN=ATM PE=1 SV=4
55	2	UniProt_human	P12236	802	32845	44	44	11	11	3.65	ADP/ATP translocase 3 OS=Homo sapiens GN=SLC25A6 PE=1 SV=4
63	1	UniProt_human	O14654	790	133685	37	37	18	18	0.89	Insulin receptor substrate 4 OS=Homo sapiens GN=IRS4 PE=1 SV=1
22	2	UniProt_human	H3BMZ2	786	49745	29	29	9	9	1.15	CCR4-NOT transcription complex subunit 1 (Fragment) OS=Homo sapiens GN=CNOT1 PE=1 SV=1
64	1	UniProt_human	P27816	775	120930	27	27	15	15	0.69	Microtubule-associated protein 4 OS=Homo sapiens GN=MAP4 PE=1 SV=3
65	1	UniProt_human	P46940	767	189134	36	36	25	25	0.75	Ras GTPase-activating-like protein IQGAP1 OS=Homo sapiens GN=IQGAP1 PE=1 SV=1
66	1	UniProt_human	Q16531	737	126887	37	37	18	18	0.89	DNA damage-binding protein 1 OS=Homo sapiens GN=DDB1 PE=1 SV=1
67	1	UniProt_human	Q9UPU5	734	294178	34	34	24	24	0.41	Ubiquitin carboxyl-terminal hydrolase 24 OS=Homo sapiens GN=USP24 PE=1 SV=3
55	3	UniProt_human	P12235	728	33043	38	38	10	10	3.05	ADP/ATP translocase 1 OS=Homo sapiens GN=SLC25A4 PE=1 SV=4
68	1	UniProt_human	Q9NR09	710	529919	32	32	22	22	0.19	Baculoviral IAP repeat-containing protein 6 OS=Homo sapiens GN=BIRC6 PE=1 SV=2
69	1	UniProt_human	F8W9S7	702	157365	30	30	19	19	0.67	GTPase-activating protein and VPS9 domain-containing protein 1 OS=Homo sapiens GN=GAPVD1 PE=1 SV=1
70	1	UniProt_human	A0A0A0MRF6	679	453214	42	42	33	33	0.36	A-kinase anchor protein 9 OS=Homo sapiens GN=AKAP9 PE=1 SV=1
71	1	UniProt_human	Q9HC35	675	108848	29	29	15	15	0.79	Echinoderm microtubule-associated protein-like 4 OS=Homo sapiens GN=EML4 PE=1 SV=3
72	1	UniProt_human	Q9BQE3	667	49863	22	22	11	11	1.54	Tubulin alpha-1C chain OS=Homo sapiens GN=TUBA1C PE=1 SV=1
73	1	UniProt_human	A0A0C4DGB6	656	69181	17	17	3	3	0.2	Serum albumin OS=Homo sapiens GN=ALB PE=1 SV=1
74	1	UniProt_human	H3BMQ0	649	194267	30	30	19	19	0.52	Tuberin OS=Homo sapiens GN=TSC2 PE=1 SV=1
75	1	UniProt_human	Q8IWZ3	646	269291	22	22	17	17	0.31	Ankyrin repeat and KH domain-containing protein 1 OS=Homo sapiens GN=ANKHD1 PE=1 SV=1
76	1	UniProt_human	A0A0G2JIW1	628	70066	24	24	10	10	1.07	Heat shock 70 kDa protein 1B OS=Homo sapiens GN=HSPA1B PE=1 SV=1
77	1	UniProt_human	H3BPE1	607	856346	27	27	25	25	0.13	Microtubule-actin cross-linking factor 1, isoforms 1/2/3/5 OS=Homo sapiens GN=MACF1 PE=1 SV=1
78	1	UniProt_human	A3KMH1	604	214689	25	25	20	20	0.49	von Willebrand factor A domain-containing protein 8 OS=Homo sapiens GN=VWA8 PE=1 SV=2
18	3	UniProt_human	Q7Z406	600	227732	22	22	15	15	0.32	Myosin-14 OS=Homo sapiens GN=MYH14 PE=1 SV=2
79	1	UniProt_human	P21359	600	319168	32	32	22	22	0.34	Neurofibromin OS=Homo sapiens GN=NF1 PE=1 SV=2
80	1	UniProt_human	Q8N3C0	591	251301	37	37	23	23	0.48	Activating signal cointegrator 1 complex subunit 3 OS=Homo sapiens GN=ASCC3 PE=1 SV=3
81	1	UniProt_human	P33527	586	171481	32	32	22	22	0.72	Multidrug resistance-associated protein 1 OS=Homo sapiens GN=ABCC1 PE=1 SV=3
82	1	UniProt_human	Q5SW79	572	175187	20	20	14	14	0.4	Centrosomal protein of 170 kDa OS=Homo sapiens GN=CEP170 PE=1 SV=1
83	1	UniProt_human	Q8TDJ6	570	339427	28	28	22	22	0.32	DmX-like protein 2 OS=Homo sapiens GN=DMXL2 PE=1 SV=2
84	1	UniProt_human	Q9Y6D5	565	201909	23	23	17	17	0.43	Brefeldin A-inhibited guanine nucleotide-exchange protein 2 OS=Homo sapiens GN=ARFGEF2 PE=1 SV=3
85	1	UniProt_human	O94822	564	200423	22	22	14	14	0.35	E3 ubiquitin-protein ligase listerin OS=Homo sapiens GN=LTN1 PE=1 SV=6
76	2	UniProt_human	E9PKE3	563	68763	20	20	11	11	0.97	Heat shock cognate 71 kDa protein OS=Homo sapiens GN=HSPA8 PE=1 SV=1
3	2	UniProt_human	E9PGC8	560	331055	28	28	21	21	0.31	Microtubule-associated protein 1A OS=Homo sapiens GN=MAP1A PE=1 SV=1
86	1	UniProt_human	P50748	550	250588	34	34	24	24	0.5	Kinetochore-associated protein 1 OS=Homo sapiens GN=KNTC1 PE=1 SV=1
87	1	UniProt_human	A0A0A0MT49	541	188742	21	21	15	15	0.4	Transcription activator BRG1 OS=Homo sapiens GN=SMARCA4 PE=1 SV=1
88	1	UniProt_human	J3KN16	538	223552	29	29	24	24	0.58	Proteasome-associated protein ECM29 homolog OS=Homo sapiens GN=KIAA0368 PE=1 SV=1
89	1	UniProt_human	P49792	537	357974	31	31	22	22	0.3	E3 SUMO-protein ligase RanBP2 OS=Homo sapiens GN=RANBP2 PE=1 SV=2
75	2	UniProt_human	H0YM23	536	263203	17	17	11	11	0.19	Ankyrin repeat domain-containing protein 17 (Fragment) OS=Homo sapiens GN=ANKRD17 PE=1 SV=1
90	1	UniProt_human	A0A087WTM1	536	175739	18	18	12	12	0.4	Roundabout homolog 1 OS=Homo sapiens GN=ROBO1 PE=1 SV=1
91	1	UniProt_human	Q00325	535	40069	25	25	8	8	1.58	Phosphate carrier protein, mitochondrial OS=Homo sapiens GN=SLC25A3 PE=1 SV=2
92	1	UniProt_human	P53621	525	138258	25	25	20	20	0.85	Coatomer subunit alpha OS=Homo sapiens GN=COPA PE=1 SV=2
93	1	UniProt_human	Q12789	519	238725	34	34	22	22	0.48	General transcription factor 3C polypeptide 1 OS=Homo sapiens GN=GTF3C1 PE=1 SV=4
94	1	UniProt_human	P19338	510	76568	22	22	13	13	1.05	Nucleolin OS=Homo sapiens GN=NCL PE=1 SV=3
12	4	UniProt_human	Q04695	501	48076	21	21	11	11	1.63	Keratin, type I cytoskeletal 17 OS=Homo sapiens GN=KRT17 PE=1 SV=2
11	6	UniProt_human	P19013	489	57250	20	20	4	4	0.34	Keratin, type II cytoskeletal 4 OS=Homo sapiens GN=KRT4 PE=1 SV=4
95	1	UniProt_human	Q8IWV7	478	200080	22	22	12	12	0.29	E3 ubiquitin-protein ligase UBR1 OS=Homo sapiens GN=UBR1 PE=1 SV=1
96	1	UniProt_human	H0Y720	471	148587	17	17	12	12	0.41	Trinucleotide repeat-containing gene 6B protein (Fragment) OS=Homo sapiens GN=TNRC6B PE=1 SV=1
84	2	UniProt_human	Q9Y6D6	463	208634	18	18	14	14	0.33	Brefeldin A-inhibited guanine nucleotide-exchange protein 1 OS=Homo sapiens GN=ARFGEF1 PE=1 SV=2
97	1	UniProt_human	Q9H1A4	453	216361	19	19	14	14	0.32	Anaphase-promoting complex subunit 1 OS=Homo sapiens GN=ANAPC1 PE=1 SV=1
98	1	UniProt_human	F5GWT4	449	225365	20	20	17	17	0.38	Serine/threonine-protein kinase WNK1 OS=Homo sapiens GN=WNK1 PE=1 SV=1
99	1	UniProt_human	A0A0A0MTC1	444	596107	21	21	19	19	0.15	E3 ubiquitin-protein ligase RNF213 OS=Homo sapiens GN=RNF213 PE=1 SV=1
100	1	UniProt_human	O14646	442	196567	21	21	16	16	0.41	Chromodomain-helicase-DNA-binding protein 1 OS=Homo sapiens GN=CHD1 PE=1 SV=2
101	1	UniProt_human	P04844	442	69241	15	15	11	11	0.96	Dolichyl-diphosphooligosaccharide--protein glycosyltransferase subunit 2 OS=Homo sapiens GN=RPN2 PE=1 SV=3
102	1	UniProt_human	O75165	434	254252	22	22	17	17	0.33	DnaJ homolog subfamily C member 13 OS=Homo sapiens GN=DNAJC13 PE=1 SV=5
103	1	UniProt_human	Q9C0C2	432	181685	28	28	17	17	0.49	182 kDa tankyrase-1-binding protein OS=Homo sapiens GN=TNKS1BP1 PE=1 SV=4
104	1	UniProt_human	Q6YHU6	426	219465	19	19	15	15	0.34	Thyroid adenoma-associated protein OS=Homo sapiens GN=THADA PE=1 SV=1
105	1	UniProt_human	Q8IWV8-4	425	200410	28	28	19	19	0.5	Isoform 4 of E3 ubiquitin-protein ligase UBR2 OS=Homo sapiens GN=UBR2
106	1	UniProt_human	Q9Y490	407	269599	11	11	8	8	0.13	Talin-1 OS=Homo sapiens GN=TLN1 PE=1 SV=3
107	1	UniProt_human	Q9H792	402	192986	22	22	17	17	0.45	Pseudopodium-enriched atypical kinase 1 OS=Homo sapiens GN=PEAK1 PE=1 SV=4
63	2	UniProt_human	Q93074	399	242928	21	21	16	16	0.32	Mediator of RNA polymerase II transcription subunit 12 OS=Homo sapiens GN=MED12 PE=1 SV=4
108	1	UniProt_human	Q9P035	398	43132	15	15	6	6	0.98	Very-long-chain (3R)-3-hydroxyacyl-CoA dehydratase 3 OS=Homo sapiens GN=HACD3 PE=1 SV=2
109	1	UniProt_human	Q5VTE0	396	50153	17	17	7	7	0.8	Putative elongation factor 1-alpha-like 3 OS=Homo sapiens GN=EEF1A1P5 PE=5 SV=1
110	1	UniProt_human	P10809	387	61016	10	10	6	6	0.52	60 kDa heat shock protein, mitochondrial OS=Homo sapiens GN=HSPD1 PE=1 SV=2
111	1	UniProt_human	Q9ULH0	385	196419	22	22	15	15	0.38	Kinase D-interacting substrate of 220 kDa OS=Homo sapiens GN=KIDINS220 PE=1 SV=3
112	1	UniProt_human	Q70EL1	379	187271	13	13	10	10	0.25	Inactive ubiquitin carboxyl-terminal hydrolase 54 OS=Homo sapiens GN=USP54 PE=1 SV=4
72	2	UniProt_human	C9J2C0	377	51952	11	11	6	6	0.63	Tubulin alpha chain (Fragment) OS=Homo sapiens GN=TUBA8 PE=1 SV=1
113	1	UniProt_human	P17987	374	60306	9	9	6	6	0.52	T-complex protein 1 subunit alpha OS=Homo sapiens GN=TCP1 PE=1 SV=1
114	1	UniProt_human	Q6Y7W6	367	149978	12	12	7	7	0.22	PERQ amino acid-rich with GYF domain-containing protein 2 OS=Homo sapiens GN=GIGYF2 PE=1 SV=1
115	1	UniProt_human	Q7Z6Z7	362	481589	15	15	14	14	0.13	E3 ubiquitin-protein ligase HUWE1 OS=Homo sapiens GN=HUWE1 PE=1 SV=3
116	1	UniProt_human	Q70CQ2	359	403973	16	16	12	12	0.13	Ubiquitin carboxyl-terminal hydrolase 34 OS=Homo sapiens GN=USP34 PE=1 SV=2
117	1	UniProt_human	B4DGL8	347	77072	11	11	7	7	0.47	ATP-binding cassette sub-family B member 7, mitochondrial (Fragment) OS=Homo sapiens GN=ABCB7 PE=1 SV=1
47	2	UniProt_human	A0A0A0MSA7	345	180385	19	19	10	10	0.27	Eukaryotic translation initiation factor 4 gamma 3 OS=Homo sapiens GN=EIF4G3 PE=1 SV=1
118	1	UniProt_human	Q9UJS0	345	74129	11	11	6	6	0.41	Calcium-binding mitochondrial carrier protein Aralar2 OS=Homo sapiens GN=SLC25A13 PE=1 SV=2
119	1	UniProt_human	Q15393	344	135492	14	14	10	10	0.37	Splicing factor 3B subunit 3 OS=Homo sapiens GN=SF3B3 PE=1 SV=4
120	1	UniProt_human	A0A0C4DGG9	341	220336	18	18	14	14	0.31	Chromodomain-helicase-DNA-binding protein 4 OS=Homo sapiens GN=CHD4 PE=1 SV=1
121	1	UniProt_human	Q15758	334	56562	14	14	5	5	0.45	Neutral amino acid transporter B(0) OS=Homo sapiens GN=SLC1A5 PE=1 SV=2
122	1	UniProt_human	Q8IZQ1	329	395006	14	14	12	12	0.14	WD repeat and FYVE domain-containing protein 3 OS=Homo sapiens GN=WDFY3 PE=1 SV=2
123	1	UniProt_human	Q8NCM8	328	492311	22	22	19	19	0.18	Cytoplasmic dynein 2 heavy chain 1 OS=Homo sapiens GN=DYNC2H1 PE=1 SV=4
124	1	UniProt_human	P38646	324	73635	7	7	4	4	0.33	Stress-70 protein, mitochondrial OS=Homo sapiens GN=HSPA9 PE=1 SV=2
125	1	UniProt_human	P48634	318	228724	17	17	10	10	0.2	Protein PRRC2A OS=Homo sapiens GN=PRRC2A PE=1 SV=3
126	1	UniProt_human	Q02952	315	191367	15	15	11	11	0.28	A-kinase anchor protein 12 OS=Homo sapiens GN=AKAP12 PE=1 SV=4
127	1	UniProt_human	F5H619	314	222562	11	11	9	9	0.19	HEAT repeat-containing protein 5A OS=Homo sapiens GN=HEATR5A PE=1 SV=1
11	7	UniProt_human	P12035	310	64378	15	15	6	6	0.48	Keratin, type II cytoskeletal 3 OS=Homo sapiens GN=KRT3 PE=1 SV=3
127	2	UniProt_human	Q9P2D3	310	224159	17	17	14	14	0.3	HEAT repeat-containing protein 5B OS=Homo sapiens GN=HEATR5B PE=1 SV=2
128	1	UniProt_human	O75691	308	318182	19	19	16	16	0.24	Small subunit processome component 20 homolog OS=Homo sapiens GN=UTP20 PE=1 SV=3
129	1	UniProt_human	Q9BQG0	306	148762	15	15	11	11	0.37	Myb-binding protein 1A OS=Homo sapiens GN=MYBBP1A PE=1 SV=2
130	1	UniProt_human	Q8TDY2	298	182975	9	9	8	8	0.2	RB1-inducible coiled-coil protein 1 OS=Homo sapiens GN=RB1CC1 PE=1 SV=3
131	1	UniProt_human	Q13535	296	301172	22	22	17	17	0.27	Serine/threonine-protein kinase ATR OS=Homo sapiens GN=ATR PE=1 SV=3
132	1	UniProt_human	P11717	295	274199	18	18	13	13	0.22	Cation-independent mannose-6-phosphate receptor OS=Homo sapiens GN=IGF2R PE=1 SV=3
133	1	UniProt_human	M0R0P8	294	243248	17	17	13	13	0.26	Unconventional myosin-IXb OS=Homo sapiens GN=MYO9B PE=1 SV=1
134	1	UniProt_human	Q5TH69	291	240498	11	11	10	10	0.19	Brefeldin A-inhibited guanine nucleotide-exchange protein 3 OS=Homo sapiens GN=ARFGEF3 PE=1 SV=3
8	2	UniProt_human	O15020	286	271157	18	18	13	13	0.23	Spectrin beta chain, non-erythrocytic 2 OS=Homo sapiens GN=SPTBN2 PE=1 SV=3
135	1	UniProt_human	P35658	286	213488	13	13	10	10	0.22	Nuclear pore complex protein Nup214 OS=Homo sapiens GN=NUP214 PE=1 SV=2
136	1	UniProt_human	Q08211	281	140869	12	12	10	10	0.35	ATP-dependent RNA helicase A OS=Homo sapiens GN=DHX9 PE=1 SV=4
137	1	UniProt_human	J3QS39	272	10463	9	9	2	2	1.19	Polyubiquitin-B (Fragment) OS=Homo sapiens GN=UBB PE=1 SV=1
125	2	UniProt_human	E7EPN9	270	308589	18	18	15	15	0.23	Protein PRRC2C OS=Homo sapiens GN=PRRC2C PE=1 SV=1
138	1	UniProt_human	P52701	263	152689	12	12	9	9	0.28	DNA mismatch repair protein Msh6 OS=Homo sapiens GN=MSH6 PE=1 SV=2
139	1	UniProt_human	Q02413	263	113676	7	7	6	6	0.25	Desmoglein-1 OS=Homo sapiens GN=DSG1 PE=1 SV=2
140	1	UniProt_human	O95831	262	66859	6	6	2	2	0.14	Apoptosis-inducing factor 1, mitochondrial OS=Homo sapiens GN=AIFM1 PE=1 SV=1
141	1	UniProt_human	S4R393	261	192863	16	16	12	12	0.3	Zinc finger SWIM domain-containing protein 8 OS=Homo sapiens GN=ZSWIM8 PE=1 SV=1
142	1	UniProt_human	Q5VT06	259	350716	12	12	10	10	0.13	Centrosome-associated protein 350 OS=Homo sapiens GN=CEP350 PE=1 SV=1
143	1	UniProt_human	J3KP15	255	15362	5	5	2	2	0.72	Serine/arginine-rich-splicing factor 2 (Fragment) OS=Homo sapiens GN=SRSF2 PE=1 SV=8
12	5	UniProt_human	Q7Z3Y8	250	49792	10	10	4	4	0.53	Keratin, type I cytoskeletal 27 OS=Homo sapiens GN=KRT27 PE=1 SV=2
144	1	UniProt_human	A0A0A0MRJ0	248	193513	10	10	8	8	0.19	Serine/threonine-protein kinase MRCK alpha OS=Homo sapiens GN=CDC42BPA PE=1 SV=1
145	1	UniProt_human	P53985	248	53909	14	14	6	6	0.6	Monocarboxylate transporter 1 OS=Homo sapiens GN=SLC16A1 PE=1 SV=3
146	1	UniProt_human	Q3V6T2	243	215909	9	9	9	9	0.19	Girdin OS=Homo sapiens GN=CCDC88A PE=1 SV=2
147	1	UniProt_human	Q5T8U5	236	21114	5	5	3	3	0.81	Surfeit 4 OS=Homo sapiens GN=SURF4 PE=1 SV=1
59	2	UniProt_human	Q15149	234	531466	9	9	6	6	0.05	Plectin OS=Homo sapiens GN=PLEC PE=1 SV=3
148	1	UniProt_human	Q12923	230	276733	12	12	11	11	0.18	Tyrosine-protein phosphatase non-receptor type 13 OS=Homo sapiens GN=PTPN13 PE=1 SV=2
149	1	UniProt_human	Q8NEY1	230	202347	11	11	9	9	0.21	Neuron navigator 1 OS=Homo sapiens GN=NAV1 PE=1 SV=2
150	1	UniProt_human	Q7Z3U7	227	190237	15	15	12	12	0.31	Protein MON2 homolog OS=Homo sapiens GN=MON2 PE=1 SV=3
151	1	UniProt_human	O14578	226	231286	8	8	8	8	0.16	Citron Rho-interacting kinase OS=Homo sapiens GN=CIT PE=1 SV=2
152	1	UniProt_human	H0YHA7	221	18962	3	3	2	2	0.55	60S ribosomal protein L18 (Fragment) OS=Homo sapiens GN=RPL18 PE=1 SV=1
153	1	UniProt_human	A0A0C4DG98	218	169475	10	10	6	6	0.16	THO complex subunit 2 OS=Homo sapiens GN=THOC2 PE=1 SV=1
154	1	UniProt_human	Q8N201	215	244143	9	9	7	7	0.13	Integrator complex subunit 1 OS=Homo sapiens GN=INTS1 PE=1 SV=2
155	1	UniProt_human	U3KQK0	214	18792	5	5	2	2	0.56	Histone H2B OS=Homo sapiens GN=HIST1H2BN PE=1 SV=1
76	3	UniProt_human	P11021	210	72288	5	5	4	4	0.26	78 kDa glucose-regulated protein OS=Homo sapiens GN=HSPA5 PE=1 SV=2
156	1	UniProt_human	Q9HC07	209	34883	7	7	4	4	0.62	Transmembrane protein 165 OS=Homo sapiens GN=TMEM165 PE=1 SV=1
131	2	UniProt_human	J3KRA9	207	398588	10	10	8	8	0.09	Serine/threonine-protein kinase SMG1 (Fragment) OS=Homo sapiens GN=SMG1 PE=1 SV=1
157	1	UniProt_human	Q9Y4H2	207	137249	9	9	6	6	0.2	Insulin receptor substrate 2 OS=Homo sapiens GN=IRS2 PE=1 SV=2
158	1	UniProt_human	Q9Y3R5	207	258068	11	11	10	10	0.18	Protein dopey-2 OS=Homo sapiens GN=DOPEY2 PE=1 SV=5
159	1	UniProt_human	F2Z2U4	207	435858	12	12	10	10	0.1	Transformation/transcription domain-associated protein OS=Homo sapiens GN=TRRAP PE=1 SV=3
160	1	UniProt_human	Q5UIP0	190	274294	10	10	8	8	0.13	Telomere-associated protein RIF1 OS=Homo sapiens GN=RIF1 PE=1 SV=2
161	1	UniProt_human	O43149	184	330864	7	7	7	7	0.09	Zinc finger ZZ-type and EF-hand domain-containing protein 1 OS=Homo sapiens GN=ZZEF1 PE=1 SV=6
162	1	UniProt_human	D6RAA6	184	25207	6	6	3	3	0.65	Transmembrane protein 33 (Fragment) OS=Homo sapiens GN=TMEM33 PE=1 SV=1
163	1	UniProt_human	Q9UKV5	182	72949	6	6	5	5	0.34	E3 ubiquitin-protein ligase AMFR OS=Homo sapiens GN=AMFR PE=1 SV=2
164	1	UniProt_human	P46977	181	80477	10	10	5	5	0.3	Dolichyl-diphosphooligosaccharide--protein glycosyltransferase subunit STT3A OS=Homo sapiens GN=STT3A PE=1 SV=2
165	1	UniProt_human	O95674	180	51384	4	4	2	2	0.18	Phosphatidate cytidylyltransferase 2 OS=Homo sapiens GN=CDS2 PE=1 SV=1
166	1	UniProt_human	Q8NI60	180	71904	3	3	2	2	0.12	Atypical kinase ADCK3, mitochondrial OS=Homo sapiens GN=ADCK3 PE=1 SV=1
167	1	UniProt_human	P08238	180	83212	6	6	5	5	0.29	Heat shock protein HSP 90-beta OS=Homo sapiens GN=HSP90AB1 PE=1 SV=4
168	1	UniProt_human	Q10570	179	160782	6	6	5	5	0.14	Cleavage and polyadenylation specificity factor subunit 1 OS=Homo sapiens GN=CPSF1 PE=1 SV=2
169	1	UniProt_human	A0A0A0MRB5	179	176444	11	11	9	9	0.24	MAP kinase-activating death domain protein OS=Homo sapiens GN=MADD PE=1 SV=1
170	1	UniProt_human	Q96RL7	179	360047	9	9	7	7	0.09	Vacuolar protein sorting-associated protein 13A OS=Homo sapiens GN=VPS13A PE=1 SV=2
171	1	UniProt_human	Q02878	176	32708	9	9	6	6	1.16	60S ribosomal protein L6 OS=Homo sapiens GN=RPL6 PE=1 SV=3
172	1	UniProt_human	O95714	175	526895	10	10	10	10	0.08	E3 ubiquitin-protein ligase HERC2 OS=Homo sapiens GN=HERC2 PE=1 SV=2
173	1	UniProt_human	D3YTB5	173	76012	2	2	1	1	0.06	Interleukin-1 receptor-associated kinase 1 OS=Homo sapiens GN=IRAK1 PE=1 SV=1
174	1	UniProt_human	A0A1B0GV47	172	184595	7	7	4	4	0.1	Kinesin-like protein KIF21A (Fragment) OS=Homo sapiens GN=KIF21A PE=4 SV=1
175	1	UniProt_human	P35637	171	53394	2	2	2	2	0.17	RNA-binding protein FUS OS=Homo sapiens GN=FUS PE=1 SV=1
176	1	UniProt_human	Q5SRE5	166	195917	11	11	8	8	0.19	Nucleoporin NUP188 homolog OS=Homo sapiens GN=NUP188 PE=1 SV=1
177	1	UniProt_human	Q8TEP8-3	163	278938	7	7	7	7	0.11	Isoform 3 of Centrosomal protein of 192 kDa OS=Homo sapiens GN=CEP192
178	1	UniProt_human	Q96SN8	158	214905	6	6	6	6	0.13	CDK5 regulatory subunit-associated protein 2 OS=Homo sapiens GN=CDK5RAP2 PE=1 SV=5
179	1	UniProt_human	P06748	155	32555	5	5	4	4	0.68	Nucleophosmin OS=Homo sapiens GN=NPM1 PE=1 SV=2
180	1	UniProt_human	Q9P2P1	155	208235	4	4	4	4	0.09	Protein NYNRIN OS=Homo sapiens GN=NYNRIN PE=2 SV=3
98	2	UniProt_human	F8W9F9	153	234235	4	4	3	3	0.06	Serine/threonine-protein kinase WNK2 OS=Homo sapiens GN=WNK2 PE=1 SV=1
181	1	UniProt_human	Q5T6W2	152	41781	2	2	2	2	0.22	Heterogeneous nuclear ribonucleoprotein K (Fragment) OS=Homo sapiens GN=HNRNPK PE=1 SV=1
182	1	UniProt_human	B9ZVN9	150	187689	7	7	7	7	0.17	DNA-directed RNA polymerase subunit OS=Homo sapiens GN=POLR1A PE=1 SV=1
183	1	UniProt_human	P39023	149	46080	5	5	4	4	0.44	60S ribosomal protein L3 OS=Homo sapiens GN=RPL3 PE=1 SV=2
184	1	UniProt_human	P55011	147	131364	5	5	4	4	0.14	Solute carrier family 12 member 2 OS=Homo sapiens GN=SLC12A2 PE=1 SV=1
185	1	UniProt_human	X6R5E5	146	23060	4	4	3	3	0.72	Ubiquitin-associated domain-containing protein 2 (Fragment) OS=Homo sapiens GN=UBAC2 PE=1 SV=1
186	1	UniProt_human	Q7L576	145	145089	8	8	8	8	0.26	Cytoplasmic FMR1-interacting protein 1 OS=Homo sapiens GN=CYFIP1 PE=1 SV=1
187	1	UniProt_human	P18583	144	263664	3	3	2	2	0.03	Protein SON OS=Homo sapiens GN=SON PE=1 SV=4
188	1	UniProt_human	A0A0C4DG89	143	117389	5	5	5	5	0.2	Probable ATP-dependent RNA helicase DDX46 OS=Homo sapiens GN=DDX46 PE=1 SV=1
189	1	UniProt_human	Q5VYS8-6	143	166865	8	8	7	7	0.2	Isoform 6 of Terminal uridylyltransferase 7 OS=Homo sapiens GN=ZCCHC6
190	1	UniProt_human	Q8IZH2	142	193985	11	11	7	7	0.17	5'-3' exoribonuclease 1 OS=Homo sapiens GN=XRN1 PE=1 SV=1
191	1	UniProt_human	H0YDM2	142	142139	3	3	3	3	0.09	Protein SOGA1 (Fragment) OS=Homo sapiens GN=SOGA1 PE=1 SV=1
192	1	UniProt_human	A0A0A0MRH6	140	113947	3	3	3	3	0.12	Melanoma inhibitory activity protein 3 (Fragment) OS=Homo sapiens GN=MIA3 PE=1 SV=6
193	1	UniProt_human	O14497	139	241892	3	3	3	3	0.05	AT-rich interactive domain-containing protein 1A OS=Homo sapiens GN=ARID1A PE=1 SV=3
194	1	UniProt_human	Q9BZH6	138	136598	6	6	4	4	0.13	WD repeat-containing protein 11 OS=Homo sapiens GN=WDR11 PE=1 SV=1
195	1	UniProt_human	A0A0G2JMS7	137	165172	6	6	6	6	0.17	Protein scribble homolog OS=Homo sapiens GN=SCRIB PE=1 SV=1
196	1	UniProt_human	Q9NZJ4	136	520795	10	10	10	10	0.09	Sacsin OS=Homo sapiens GN=SACS PE=1 SV=2
197	1	UniProt_human	Q13247	136	39563	6	6	4	4	0.53	Serine/arginine-rich splicing factor 6 OS=Homo sapiens GN=SRSF6 PE=1 SV=2
198	1	UniProt_human	H0YAC6	136	166808	4	4	3	3	0.08	Lipopolysaccharide-responsive and beige-like anchor protein (Fragment) OS=Homo sapiens GN=LRBA PE=1 SV=1
133	2	UniProt_human	B2RTY4	135	292522	4	4	3	3	0.04	Unconventional myosin-IXa OS=Homo sapiens GN=MYO9A PE=1 SV=2
199	1	UniProt_human	A6NNN6	135	210003	5	5	4	4	0.08	Pericentriolar material 1 protein OS=Homo sapiens GN=PCM1 PE=1 SV=5
200	1	UniProt_human	A0A087X0X3	133	77518	6	6	4	4	0.24	Heterogeneous nuclear ribonucleoprotein M OS=Homo sapiens GN=HNRNPM PE=1 SV=1
201	1	UniProt_human	A0A0B4J1Z1	132	15753	6	6	3	3	1.2	Serine/arginine-rich-splicing factor 7 OS=Homo sapiens GN=SRSF7 PE=1 SV=1
202	1	UniProt_human	A0A087WU64	132	165663	3	3	2	2	0.05	DNA polymerase OS=Homo sapiens GN=POLA1 PE=1 SV=1
203	1	UniProt_human	P36578	131	47667	9	9	6	6	0.7	60S ribosomal protein L4 OS=Homo sapiens GN=RPL4 PE=1 SV=5
204	1	UniProt_human	H0YME5	131	161128	8	8	6	6	0.17	eIF-2-alpha kinase GCN2 (Fragment) OS=Homo sapiens GN=EIF2AK4 PE=1 SV=1
205	1	UniProt_human	Q86VV8	130	248470	5	5	3	3	0.05	Rotatin OS=Homo sapiens GN=RTTN PE=1 SV=3
206	1	UniProt_human	Q14999	130	191040	6	6	6	6	0.14	Cullin-7 OS=Homo sapiens GN=CUL7 PE=1 SV=2
207	1	UniProt_human	Q6P1M0	130	72018	6	6	6	6	0.42	Long-chain fatty acid transport protein 4 OS=Homo sapiens GN=SLC27A4 PE=1 SV=1
208	1	UniProt_human	P42695	130	168783	5	5	5	5	0.13	Condensin-2 complex subunit D3 OS=Homo sapiens GN=NCAPD3 PE=1 SV=2
209	1	UniProt_human	C9J792	129	6993	2	2	1	1	0.78	Splicing factor 1 (Fragment) OS=Homo sapiens GN=SF1 PE=1 SV=1
210	1	UniProt_human	Q9NZ01	129	36011	8	8	5	5	0.8	Very-long-chain enoyl-CoA reductase OS=Homo sapiens GN=TECR PE=1 SV=1
211	1	UniProt_human	H0Y6I0	129	246456	5	5	5	5	0.09	Golgin subfamily A member 4 (Fragment) OS=Homo sapiens GN=GOLGA4 PE=1 SV=1
212	1	UniProt_human	H0YJ97	128	195693	4	4	4	4	0.09	Thyroid receptor-interacting protein 11 (Fragment) OS=Homo sapiens GN=TRIP11 PE=1 SV=1
213	1	UniProt_human	O60293	128	226214	6	6	6	6	0.12	Zinc finger C3H1 domain-containing protein OS=Homo sapiens GN=ZFC3H1 PE=1 SV=3
12	6	UniProt_human	F8VZY9	127	43747	6	6	2	2	0.21	Keratin, type I cytoskeletal 18 OS=Homo sapiens GN=KRT18 PE=1 SV=1
214	1	UniProt_human	Q9P2F8	127	190318	8	8	6	6	0.14	Signal-induced proliferation-associated 1-like protein 2 OS=Homo sapiens GN=SIPA1L2 PE=1 SV=2
144	2	UniProt_human	Q9Y5S2	126	194193	4	4	3	3	0.07	Serine/threonine-protein kinase MRCK beta OS=Homo sapiens GN=CDC42BPB PE=1 SV=2
215	1	UniProt_human	J3KQ96	125	144040	6	6	6	6	0.19	Treacle protein (Fragment) OS=Homo sapiens GN=TCOF1 PE=1 SV=1
216	1	UniProt_human	P16591	124	94578	5	5	4	4	0.2	Tyrosine-protein kinase Fer OS=Homo sapiens GN=FER PE=1 SV=2
217	1	UniProt_human	P26358	124	183050	7	7	6	6	0.15	DNA (cytosine-5)-methyltransferase 1 OS=Homo sapiens GN=DNMT1 PE=1 SV=2
118	2	UniProt_human	O75746	123	74715	4	4	3	3	0.19	Calcium-binding mitochondrial carrier protein Aralar1 OS=Homo sapiens GN=SLC25A12 PE=1 SV=2
218	1	UniProt_human	H3BP78	122	122868	4	4	4	4	0.15	Fanconi anemia group I protein (Fragment) OS=Homo sapiens GN=FANCI PE=1 SV=1
219	1	UniProt_human	B4DR61	120	52915	5	5	3	3	0.27	Protein transport protein Sec61 subunit alpha isoform 1 OS=Homo sapiens GN=SEC61A1 PE=1 SV=1
220	1	UniProt_human	Q7Z7G8	120	448378	6	6	6	6	0.06	Vacuolar protein sorting-associated protein 13B OS=Homo sapiens GN=VPS13B PE=1 SV=2
221	1	UniProt_human	Q5VWV2	119	144402	3	3	3	3	0.09	Partitioning defective 3 homolog OS=Homo sapiens GN=PARD3 PE=1 SV=1
222	1	UniProt_human	B4DLN1	119	48069	2	2	2	2	0.19	Uncharacterized protein OS=Homo sapiens PE=2 SV=1
77	2	UniProt_human	E9PLY5	118	159823	5	5	5	5	0.14	Microtubule-actin cross-linking factor 1, isoforms 1/2/3/5 (Fragment) OS=Homo sapiens GN=MACF1 PE=1 SV=1
223	1	UniProt_human	Q68DK2	118	284395	5	5	4	4	0.06	Zinc finger FYVE domain-containing protein 26 OS=Homo sapiens GN=ZFYVE26 PE=1 SV=3
224	1	UniProt_human	P60709	118	41710	5	5	4	4	0.5	Actin, cytoplasmic 1 OS=Homo sapiens GN=ACTB PE=1 SV=1
225	1	UniProt_human	P14923	118	81693	5	5	3	3	0.17	Junction plakoglobin OS=Homo sapiens GN=JUP PE=1 SV=3
226	1	UniProt_human	C9JMB5	117	24942	1	1	1	1	0.18	T-lymphoma invasion and metastasis-inducing protein 1 (Fragment) OS=Homo sapiens GN=TIAM1 PE=1 SV=1
227	1	UniProt_human	Q9Y2I7	116	236986	4	4	4	4	0.07	1-phosphatidylinositol 3-phosphate 5-kinase OS=Homo sapiens GN=PIKFYVE PE=1 SV=3
229	1	UniProt_human	Q5JSL3	115	237519	5	5	5	5	0.09	Dedicator of cytokinesis protein 11 OS=Homo sapiens GN=DOCK11 PE=1 SV=2
230	1	UniProt_human	A0A0D9SEI8	115	10532	2	2	1	1	0.47	Y-box-binding protein 3 (Fragment) OS=Homo sapiens GN=YBX3 PE=1 SV=1
231	1	UniProt_human	Q12756	115	190944	6	6	6	6	0.14	Kinesin-like protein KIF1A OS=Homo sapiens GN=KIF1A PE=1 SV=2
232	1	UniProt_human	P03886	115	35637	7	7	2	2	0.27	NADH-ubiquinone oxidoreductase chain 1 OS=Homo sapiens GN=MT-ND1 PE=1 SV=1
233	1	UniProt_human	F5H7J9	115	175324	7	7	6	6	0.16	Low-density lipoprotein receptor-related protein 6 OS=Homo sapiens GN=LRP6 PE=1 SV=1
98	3	UniProt_human	A0A087WYK2	114	198158	5	5	4	4	0.09	Serine/threonine-protein kinase WNK3 OS=Homo sapiens GN=WNK3 PE=1 SV=1
228	1	UniProt_human	J3KPF0	114	484047	4	4	4	4	0.04	Probable E3 ubiquitin-protein ligase HECTD4 OS=Homo sapiens GN=HECTD4 PE=1 SV=3
234	1	UniProt_human	O94915	112	339383	7	7	7	7	0.09	Protein furry homolog-like OS=Homo sapiens GN=FRYL PE=1 SV=2
63	3	UniProt_human	F8WAE6	111	203651	3	3	2	2	0.04	Mediator of RNA polymerase II transcription subunit 12-like protein OS=Homo sapiens GN=MED12L PE=1 SV=1
235	1	UniProt_human	Q86YZ3	111	282228	3	3	2	2	0.03	Hornerin OS=Homo sapiens GN=HRNR PE=1 SV=2
197	2	UniProt_human	A0A0D9SEM4	110	43622	5	5	3	3	0.34	Serine/arginine-rich-splicing factor 4 (Fragment) OS=Homo sapiens GN=SRSF4 PE=1 SV=1
236	1	UniProt_human	C9JA28	110	20149	2	2	1	1	0.23	Translocon-associated protein subunit gamma OS=Homo sapiens GN=SSR3 PE=1 SV=1
237	1	UniProt_human	G5E933	110	208312	5	5	5	5	0.11	Myotubularin-related protein 5 OS=Homo sapiens GN=SBF1 PE=1 SV=1
238	1	UniProt_human	P35606	110	102422	7	7	7	7	0.34	Coatomer subunit beta' OS=Homo sapiens GN=COPB2 PE=1 SV=2
239	1	UniProt_human	Q8TD19	109	107100	4	4	3	3	0.13	Serine/threonine-protein kinase Nek9 OS=Homo sapiens GN=NEK9 PE=1 SV=2
240	1	UniProt_human	P10412	109	21852	5	5	2	2	0.47	Histone H1.4 OS=Homo sapiens GN=HIST1H1E PE=1 SV=2
241	1	UniProt_human	Q9UBM7	108	54454	6	6	4	4	0.36	7-dehydrocholesterol reductase OS=Homo sapiens GN=DHCR7 PE=1 SV=1
242	1	UniProt_human	P43007	107	55688	2	2	1	1	0.08	Neutral amino acid transporter A OS=Homo sapiens GN=SLC1A4 PE=1 SV=1
243	1	UniProt_human	Q5H8A4	107	108103	2	2	2	2	0.08	GPI ethanolamine phosphate transferase 2 OS=Homo sapiens GN=PIGG PE=1 SV=1
244	1	UniProt_human	Q5VZL5	107	172677	1	1	1	1	0.02	Zinc finger MYM-type protein 4 OS=Homo sapiens GN=ZMYM4 PE=1 SV=1
245	1	UniProt_human	G3XAN4	105	33414	4	4	2	2	0.65	Translocating chain-associated membrane protein 1 OS=Homo sapiens GN=TRAM1 PE=1 SV=1
246	1	UniProt_human	Q9Y2W1	105	108601	5	5	4	4	0.17	Thyroid hormone receptor-associated protein 3 OS=Homo sapiens GN=THRAP3 PE=1 SV=2
247	1	UniProt_human	A2RRP1	105	268401	2	2	2	2	0.03	Neuroblastoma-amplified sequence OS=Homo sapiens GN=NBAS PE=1 SV=2
248	1	UniProt_human	Q7KZN9	104	46000	7	7	4	4	0.44	Cytochrome c oxidase assembly protein COX15 homolog OS=Homo sapiens GN=COX15 PE=1 SV=1
249	1	UniProt_human	H7BZK4	103	23627	2	2	1	1	0.19	Sodium-dependent phosphate transporter 1 (Fragment) OS=Homo sapiens GN=SLC20A1 PE=1 SV=1
250	1	UniProt_human	P11047	102	177489	3	3	3	3	0.07	Laminin subunit gamma-1 OS=Homo sapiens GN=LAMC1 PE=1 SV=3
251	1	UniProt_human	O75962	102	346683	7	7	6	6	0.08	Triple functional domain protein OS=Homo sapiens GN=TRIO PE=1 SV=2
252	1	UniProt_human	P48651	102	55491	3	3	2	2	0.16	Phosphatidylserine synthase 1 OS=Homo sapiens GN=PTDSS1 PE=1 SV=1
253	1	UniProt_human	O15047	101	185920	2	2	2	2	0.05	Histone-lysine N-methyltransferase SETD1A OS=Homo sapiens GN=SETD1A PE=1 SV=3
254	1	UniProt_human	Q5JR95	101	21866	3	3	2	2	0.47	40S ribosomal protein S8 OS=Homo sapiens GN=RPS8 PE=1 SV=1
255	1	UniProt_human	O14980	100	123306	2	2	2	2	0.07	Exportin-1 OS=Homo sapiens GN=XPO1 PE=1 SV=1
256	1	UniProt_human	P51587	100	383963	5	5	4	4	0.05	Breast cancer type 2 susceptibility protein OS=Homo sapiens GN=BRCA2 PE=1 SV=3
257	1	UniProt_human	O43592	98	109893	4	4	3	3	0.12	Exportin-T OS=Homo sapiens GN=XPOT PE=1 SV=2
258	1	UniProt_human	Q14789	97	375790	5	5	5	5	0.06	Golgin subfamily B member 1 OS=Homo sapiens GN=GOLGB1 PE=1 SV=2
259	1	UniProt_human	H0YDX7	96	60573	3	3	3	3	0.23	HBS1-like protein (Fragment) OS=Homo sapiens GN=HBS1L PE=1 SV=1
260	1	UniProt_human	H0Y2W2	95	64315	2	2	2	2	0.14	ATPase family AAA domain-containing protein 3A (Fragment) OS=Homo sapiens GN=ATAD3A PE=1 SV=1
261	1	UniProt_human	Q9UPV0	94	164214	3	3	3	3	0.08	Centrosomal protein of 164 kDa OS=Homo sapiens GN=CEP164 PE=1 SV=3
262	1	UniProt_human	Q68DQ2	92	330427	6	6	5	5	0.07	Very large A-kinase anchor protein OS=Homo sapiens GN=CRYBG3 PE=1 SV=3
24	2	UniProt_human	Q96HP0	91	229414	5	5	5	5	0.1	Dedicator of cytokinesis protein 6 OS=Homo sapiens GN=DOCK6 PE=1 SV=3
263	1	UniProt_human	O14617	91	130076	5	5	4	4	0.14	AP-3 complex subunit delta-1 OS=Homo sapiens GN=AP3D1 PE=1 SV=1
264	1	UniProt_human	M0QY97	91	95478	2	2	2	2	0.09	Zinc finger CCCH domain-containing protein 4 (Fragment) OS=Homo sapiens GN=ZC3H4 PE=1 SV=1
265	1	UniProt_human	P52292	90	57826	1	1	1	1	0.08	Importin subunit alpha-1 OS=Homo sapiens GN=KPNA2 PE=1 SV=1
266	1	UniProt_human	Q69YN4	90	201898	4	4	3	3	0.07	Protein virilizer homolog OS=Homo sapiens GN=KIAA1429 PE=1 SV=2
267	1	UniProt_human	Q9Y383	89	46486	4	4	3	3	0.31	Putative RNA-binding protein Luc7-like 2 OS=Homo sapiens GN=LUC7L2 PE=1 SV=2
268	1	UniProt_human	Q8NG31	89	265224	4	4	4	4	0.07	Protein CASC5 OS=Homo sapiens GN=CASC5 PE=1 SV=3
269	1	UniProt_human	A0A087X295	87	124921	4	4	2	2	0.07	WD repeat-containing protein 6 OS=Homo sapiens GN=WDR6 PE=1 SV=1
270	1	UniProt_human	Q9HD67-3	87	163451	2	2	2	2	0.05	Isoform Headless of Unconventional myosin-X OS=Homo sapiens GN=MYO10
271	1	UniProt_human	Q8TER5-3	86	162699	5	5	4	4	0.11	Isoform 3 of Rho guanine nucleotide exchange factor 40 OS=Homo sapiens GN=ARHGEF40
272	1	UniProt_human	Q5TB21	86	15842	1	1	1	1	0.3	Anterior pharynx defective 1 homolog A (C. elegans) (Fragment) OS=Homo sapiens GN=APH1A PE=1 SV=1
273	1	UniProt_human	O14681	86	38940	2	2	2	2	0.24	Etoposide-induced protein 2.4 homolog OS=Homo sapiens GN=EI24 PE=1 SV=4
274	1	UniProt_human	A6NHR9	86	226231	4	4	3	3	0.06	Structural maintenance of chromosomes flexible hinge domain-containing protein 1 OS=Homo sapiens GN=SMCHD1 PE=1 SV=2
275	1	UniProt_human	Q5D862	85	247928	2	2	2	2	0.03	Filaggrin-2 OS=Homo sapiens GN=FLG2 PE=1 SV=1
276	1	UniProt_human	E7ERS3	85	108875	3	3	2	2	0.08	Zinc finger CCCH domain-containing protein 18 OS=Homo sapiens GN=ZC3H18 PE=1 SV=1
277	1	UniProt_human	I3L295	85	11795	4	4	2	2	1.01	Mannose-P-dolichol utilization defect 1 isoform 2 OS=Homo sapiens GN=MPDU1 PE=1 SV=1
278	1	UniProt_human	A0A0C4DGS9	85	31273	5	5	2	2	0.31	Choline/ethanolaminephosphotransferase 1 OS=Homo sapiens GN=CEPT1 PE=1 SV=1
279	1	UniProt_human	Q8WZ64	84	193331	2	2	2	2	0.04	Arf-GAP with Rho-GAP domain, ANK repeat and PH domain-containing protein 2 OS=Homo sapiens GN=ARAP2 PE=1 SV=3
280	1	UniProt_human	Q9Y5B9	84	119838	4	4	3	3	0.11	FACT complex subunit SPT16 OS=Homo sapiens GN=SUPT16H PE=1 SV=1
281	1	UniProt_human	J3KNP2	83	77042	2	2	2	2	0.12	Transducin beta-like protein 3 (Fragment) OS=Homo sapiens GN=TBL3 PE=1 SV=1
282	1	UniProt_human	A0A087X1I3	83	56627	1	1	1	1	0.08	Succinate dehydrogenase [ubiquinone] flavoprotein subunit, mitochondrial OS=Homo sapiens GN=SDHA PE=1 SV=1
283	1	UniProt_human	E9PI08	83	33406	2	2	1	1	0.13	CAAX prenyl protease 2 OS=Homo sapiens GN=RCE1 PE=1 SV=1
284	1	UniProt_human	Q96RT7	83	200372	2	2	2	2	0.04	Gamma-tubulin complex component 6 OS=Homo sapiens GN=TUBGCP6 PE=1 SV=3
285	1	UniProt_human	Q9BXW9	83	164025	2	2	2	2	0.05	Fanconi anemia group D2 protein OS=Homo sapiens GN=FANCD2 PE=1 SV=2
286	1	UniProt_human	P11166	82	54049	3	3	2	2	0.17	Solute carrier family 2, facilitated glucose transporter member 1 OS=Homo sapiens GN=SLC2A1 PE=1 SV=2
287	1	UniProt_human	Q6W2J9	82	192069	3	3	3	3	0.07	BCL-6 corepressor OS=Homo sapiens GN=BCOR PE=1 SV=1
288	1	UniProt_human	Q5T8U3	82	21531	5	5	5	5	1.64	60S ribosomal protein L7a (Fragment) OS=Homo sapiens GN=RPL7A PE=1 SV=1
289	1	UniProt_human	Q6ZT12	82	212296	2	2	2	2	0.04	E3 ubiquitin-protein ligase UBR3 OS=Homo sapiens GN=UBR3 PE=2 SV=2
290	1	UniProt_human	O75419-2	81	60206	4	4	2	2	0.15	Isoform 2 of Cell division control protein 45 homolog OS=Homo sapiens GN=CDC45
291	1	UniProt_human	A0A0D9SF53	81	81426	3	3	3	3	0.17	ATP-dependent RNA helicase DDX3X OS=Homo sapiens GN=DDX3X PE=1 SV=1
292	1	UniProt_human	Q9NZM3	81	193340	5	5	4	4	0.09	Intersectin-2 OS=Homo sapiens GN=ITSN2 PE=1 SV=3
293	1	UniProt_human	B7ZAR1	81	55314	1	1	1	1	0.08	T-complex protein 1 subunit epsilon OS=Homo sapiens GN=CCT5 PE=1 SV=1
294	1	UniProt_human	Q8N1N4	80	56830	2	2	2	2	0.16	Keratin, type II cytoskeletal 78 OS=Homo sapiens GN=KRT78 PE=2 SV=2
295	1	UniProt_human	P04406	80	36030	3	3	3	3	0.42	Glyceraldehyde-3-phosphate dehydrogenase OS=Homo sapiens GN=GAPDH PE=1 SV=3
296	1	UniProt_human	Q96N66	79	52730	2	2	2	2	0.17	Lysophospholipid acyltransferase 7 OS=Homo sapiens GN=MBOAT7 PE=1 SV=2
297	1	UniProt_human	Q9UGM3-9	79	124373	1	1	1	1	0.03	Isoform 9 of Deleted in malignant brain tumors 1 protein OS=Homo sapiens GN=DMBT1
298	1	UniProt_human	H3BNH8	79	10372	1	1	1	1	0.49	Uncharacterized protein (Fragment) OS=Homo sapiens PE=4 SV=2
299	1	UniProt_human	E9PKN0	79	88932	3	3	3	3	0.15	Pre-mRNA cleavage complex 2 protein Pcf11 (Fragment) OS=Homo sapiens GN=PCF11 PE=1 SV=1
300	1	UniProt_human	J3KNF5	79	290365	3	3	3	3	0.04	Centrosomal protein of 290 kDa OS=Homo sapiens GN=CEP290 PE=1 SV=1
301	1	UniProt_human	Q14739	79	70658	2	2	1	1	0.06	Lamin-B receptor OS=Homo sapiens GN=LBR PE=1 SV=2
302	1	UniProt_human	Q149N8-2	79	107273	3	3	3	3	0.13	Isoform 2 of E3 ubiquitin-protein ligase SHPRH OS=Homo sapiens GN=SHPRH
303	1	UniProt_human	Q709C8	78	422124	3	3	3	3	0.03	Vacuolar protein sorting-associated protein 13C OS=Homo sapiens GN=VPS13C PE=1 SV=1
304	1	UniProt_human	Q86UL3	78	52037	1	1	1	1	0.08	Glycerol-3-phosphate acyltransferase 4 OS=Homo sapiens GN=GPAT4 PE=1 SV=1
305	1	UniProt_human	P10599	76	11730	1	1	1	1	0.42	Thioredoxin OS=Homo sapiens GN=TXN PE=1 SV=3
306	1	UniProt_human	J3KPP4	76	58185	3	3	3	3	0.24	Cisplatin resistance-associated overexpressed protein, isoform CRA_b OS=Homo sapiens GN=LUC7L3 PE=1 SV=1
307	1	UniProt_human	O95864	75	52226	5	5	3	3	0.27	Fatty acid desaturase 2 OS=Homo sapiens GN=FADS2 PE=1 SV=1
308	1	UniProt_human	K7EPA3	75	50520	2	2	2	2	0.18	Transmembrane protein 161A OS=Homo sapiens GN=TMEM161A PE=1 SV=2
309	1	UniProt_human	Q9C0C9	75	141205	3	3	3	3	0.09	(E3-independent) E2 ubiquitin-conjugating enzyme OS=Homo sapiens GN=UBE2O PE=1 SV=3
310	1	UniProt_human	P12273	75	16562	2	2	1	1	0.29	Prolactin-inducible protein OS=Homo sapiens GN=PIP PE=1 SV=1
311	1	UniProt_human	Q8IZV2	75	19560	1	1	1	1	0.24	CKLF-like MARVEL transmembrane domain-containing protein 8 OS=Homo sapiens GN=CMTM8 PE=1 SV=2
312	1	UniProt_human	Q08AD1	75	167984	3	3	3	3	0.08	Calmodulin-regulated spectrin-associated protein 2 OS=Homo sapiens GN=CAMSAP2 PE=1 SV=3
77	3	UniProt_human	E7ERU0	74	615272	2	2	2	2	0.01	Dystonin OS=Homo sapiens GN=DST PE=1 SV=1
313	1	UniProt_human	A6NLH6	74	15760	2	2	1	1	0.3	Protein cornichon homolog 4 OS=Homo sapiens GN=CNIH4 PE=1 SV=1
314	1	UniProt_human	I3L1T3	74	18026	1	1	1	1	0.26	Derlin (Fragment) OS=Homo sapiens GN=DERL2 PE=1 SV=1
315	1	UniProt_human	O14828	73	38262	1	1	1	1	0.12	Secretory carrier-associated membrane protein 3 OS=Homo sapiens GN=SCAMP3 PE=1 SV=3
316	1	UniProt_human	E9PD35	73	146362	3	3	3	3	0.09	Vascular endothelial growth factor receptor 3 OS=Homo sapiens GN=FLT4 PE=1 SV=1
317	1	UniProt_human	Q8IWA0	73	94438	3	3	3	3	0.14	WD repeat-containing protein 75 OS=Homo sapiens GN=WDR75 PE=1 SV=1
318	1	UniProt_human	A0A087WTU9	73	456139	2	2	2	2	0.02	Alstrom syndrome protein 1 OS=Homo sapiens GN=ALMS1 PE=1 SV=1
319	1	UniProt_human	Q04656	73	163270	2	2	2	2	0.05	Copper-transporting ATPase 1 OS=Homo sapiens GN=ATP7A PE=1 SV=3
320	1	UniProt_human	Q3LIE7	72	49404	2	2	1	1	0.09	Delta(24)-sterol reductase OS=Homo sapiens GN=Nbla03646 PE=1 SV=1
321	1	UniProt_human	E7EPB3	72	14549	1	1	1	1	0.33	60S ribosomal protein L14 OS=Homo sapiens GN=RPL14 PE=1 SV=1
322	1	UniProt_human	A0A087WU26	72	38708	3	3	3	3	0.39	Ribosome-binding protein 1 OS=Homo sapiens GN=RRBP1 PE=1 SV=1
323	1	UniProt_human	A0A0C4DGH5	72	85355	1	1	1	1	0.05	Cullin-associated NEDD8-dissociated protein 1 (Fragment) OS=Homo sapiens GN=CAND1 PE=1 SV=1
324	1	UniProt_human	E9PMR6	72	161808	2	2	2	2	0.05	Rho guanine nucleotide exchange factor 12 OS=Homo sapiens GN=ARHGEF12 PE=1 SV=1
325	1	UniProt_human	Q92545	72	205011	1	1	1	1	0.02	Transmembrane protein 131 OS=Homo sapiens GN=TMEM131 PE=1 SV=3
326	1	UniProt_human	K7EK78	71	12762	1	1	1	1	0.38	Uncharacterized protein OS=Homo sapiens PE=4 SV=1
327	1	UniProt_human	P06213	71	156232	1	1	1	1	0.03	Insulin receptor OS=Homo sapiens GN=INSR PE=1 SV=4
328	1	UniProt_human	Q08554	71	99924	2	2	2	2	0.09	Desmocollin-1 OS=Homo sapiens GN=DSC1 PE=1 SV=2
329	1	UniProt_human	Q9NUQ2	71	42045	1	1	1	1	0.11	1-acyl-sn-glycerol-3-phosphate acyltransferase epsilon OS=Homo sapiens GN=AGPAT5 PE=1 SV=3
330	1	UniProt_human	Q9Y2A7	71	128707	1	1	1	1	0.03	Nck-associated protein 1 OS=Homo sapiens GN=NCKAP1 PE=1 SV=1
331	1	UniProt_human	Q969M3	71	27971	3	3	2	2	0.35	Protein YIPF5 OS=Homo sapiens GN=YIPF5 PE=1 SV=1
332	1	UniProt_human	Q6P3X3	71	96571	2	2	2	2	0.09	Tetratricopeptide repeat protein 27 OS=Homo sapiens GN=TTC27 PE=1 SV=1
125	3	UniProt_human	Q5JSZ5	70	242817	2	2	2	2	0.04	Protein PRRC2B OS=Homo sapiens GN=PRRC2B PE=1 SV=2
333	1	UniProt_human	O95163	70	150159	2	2	2	2	0.06	Elongator complex protein 1 OS=Homo sapiens GN=IKBKAP PE=1 SV=3
334	1	UniProt_human	E9PD53	70	144365	2	2	2	2	0.06	Structural maintenance of chromosomes protein OS=Homo sapiens GN=SMC4 PE=1 SV=1
335	1	UniProt_human	Q00839	69	90528	1	1	1	1	0.05	Heterogeneous nuclear ribonucleoprotein U OS=Homo sapiens GN=HNRNPU PE=1 SV=6
336	1	UniProt_human	E9PJD9	69	10121	2	2	1	1	0.5	60S ribosomal protein L27a OS=Homo sapiens GN=RPL27A PE=1 SV=1
337	1	UniProt_human	Q6GYQ0	69	229686	2	2	2	2	0.04	Ral GTPase-activating protein subunit alpha-1 OS=Homo sapiens GN=RALGAPA1 PE=1 SV=1
338	1	UniProt_human	H0YKS4	68	19518	2	2	2	2	0.53	Annexin (Fragment) OS=Homo sapiens GN=ANXA2 PE=1 SV=1
339	1	UniProt_human	Q8TCT9	68	41462	6	6	3	3	0.36	Minor histocompatibility antigen H13 OS=Homo sapiens GN=HM13 PE=1 SV=1
340	1	UniProt_human	Q9Y5Y0	68	59824	1	1	1	1	0.07	Feline leukemia virus subgroup C receptor-related protein 1 OS=Homo sapiens GN=FLVCR1 PE=1 SV=1
341	1	UniProt_human	Q5M9Q1	68	46284	2	2	1	1	0.1	NKAP-like protein OS=Homo sapiens GN=NKAPL PE=2 SV=3
342	1	UniProt_human	Q14980	68	238115	3	3	3	3	0.06	Nuclear mitotic apparatus protein 1 OS=Homo sapiens GN=NUMA1 PE=1 SV=2
343	1	UniProt_human	S4R3H4	68	145355	4	4	4	4	0.12	Apoptotic chromatin condensation inducer in the nucleus OS=Homo sapiens GN=ACIN1 PE=1 SV=1
344	1	UniProt_human	Q5T985	67	105150	1	1	1	1	0.04	Inter-alpha-trypsin inhibitor heavy chain H2 OS=Homo sapiens GN=ITIH2 PE=1 SV=1
345	1	UniProt_human	Q5SZU1	67	53051	1	1	1	1	0.08	D-3-phosphoglycerate dehydrogenase OS=Homo sapiens GN=PHGDH PE=1 SV=1
346	1	UniProt_human	Q7Z2Z1	67	210725	1	1	1	1	0.02	Treslin OS=Homo sapiens GN=TICRR PE=1 SV=2
347	1	UniProt_human	O15440	67	160558	4	4	4	4	0.11	Multidrug resistance-associated protein 5 OS=Homo sapiens GN=ABCC5 PE=1 SV=2
348	1	UniProt_human	O43379	67	165849	3	3	3	3	0.08	WD repeat-containing protein 62 OS=Homo sapiens GN=WDR62 PE=1 SV=4
349	1	UniProt_human	Q8TB61	67	47484	2	2	2	2	0.19	Adenosine 3'-phospho 5'-phosphosulfate transporter 1 OS=Homo sapiens GN=SLC35B2 PE=1 SV=1
350	1	UniProt_human	Q8IWU2	67	164799	1	1	1	1	0.03	Serine/threonine-protein kinase LMTK2 OS=Homo sapiens GN=LMTK2 PE=1 SV=2
351	1	UniProt_human	V9GYZ6	67	108972	2	2	2	2	0.08	Bifunctional glutamate/proline--tRNA ligase (Fragment) OS=Homo sapiens GN=EPRS PE=1 SV=1
352	1	UniProt_human	A0A087WYV8	66	314460	1	1	1	1	0.01	Fibrillin-2 OS=Homo sapiens GN=FBN2 PE=1 SV=1
353	1	UniProt_human	Q86YV5	66	149529	1	1	1	1	0.03	Tyrosine-protein kinase SgK223 OS=Homo sapiens GN=SGK223 PE=1 SV=4
354	1	UniProt_human	Q6UWP7	66	48888	1	1	1	1	0.09	Lysocardiolipin acyltransferase 1 OS=Homo sapiens GN=LCLAT1 PE=1 SV=1
355	1	UniProt_human	A0A087WZ65	65	108645	2	2	2	2	0.08	Ankyrin-3 (Fragment) OS=Homo sapiens GN=ANK3 PE=1 SV=1
356	1	UniProt_human	Q06481	65	86900	1	1	1	1	0.05	Amyloid-like protein 2 OS=Homo sapiens GN=APLP2 PE=1 SV=2
357	1	UniProt_human	Q2PPJ7	65	210636	1	1	1	1	0.02	Ral GTPase-activating protein subunit alpha-2 OS=Homo sapiens GN=RALGAPA2 PE=1 SV=2
358	1	UniProt_human	Q14573	65	303912	1	1	1	1	0.01	Inositol 1,4,5-trisphosphate receptor type 3 OS=Homo sapiens GN=ITPR3 PE=1 SV=2
359	1	UniProt_human	A0A0J9YXM6	65	211435	1	1	1	1	0.02	WD repeat-containing protein 81 OS=Homo sapiens GN=WDR81 PE=1 SV=1
360	1	UniProt_human	Q15648	65	168373	2	2	1	1	0.03	Mediator of RNA polymerase II transcription subunit 1 OS=Homo sapiens GN=MED1 PE=1 SV=4
361	1	UniProt_human	P47914	64	17741	3	3	2	2	0.6	60S ribosomal protein L29 OS=Homo sapiens GN=RPL29 PE=1 SV=2
362	1	UniProt_human	E9PJC4	64	24247	1	1	1	1	0.19	Transmembrane 9 superfamily member (Fragment) OS=Homo sapiens GN=TM9SF1 PE=3 SV=1
363	1	UniProt_human	C9IZA5	64	18304	3	3	2	2	0.58	Transitional endoplasmic reticulum ATPase (Fragment) OS=Homo sapiens GN=VCP PE=1 SV=1
365	1	UniProt_human	Q9BVV6-3	64	181888	1	1	1	1	0.02	Isoform 3 of Protein TALPID3 OS=Homo sapiens GN=KIAA0586
366	1	UniProt_human	F5H562	64	110249	2	2	2	2	0.08	Copper-transporting ATPase 2 OS=Homo sapiens GN=ATP7B PE=1 SV=1
364	1	UniProt_human	Q7Z3T8	63	168797	5	5	3	3	0.08	Zinc finger FYVE domain-containing protein 16 OS=Homo sapiens GN=ZFYVE16 PE=1 SV=3
367	1	UniProt_human	R4GMN2	63	42646	1	1	1	1	0.1	DENN domain-containing protein 4C (Fragment) OS=Homo sapiens GN=DENND4C PE=1 SV=1
309	2	UniProt_human	K7EQ12	62	20958	3	3	3	3	0.49	(E3-independent) E2 ubiquitin-conjugating enzyme (Fragment) OS=Homo sapiens GN=UBE2O PE=1 SV=1
369	1	UniProt_human	Q14674	62	233028	4	4	4	4	0.08	Separin OS=Homo sapiens GN=ESPL1 PE=1 SV=3
370	1	UniProt_human	Q92522	61	22474	1	1	1	1	0.21	Histone H1x OS=Homo sapiens GN=H1FX PE=1 SV=1
371	1	UniProt_human	Q6KC79	61	315854	2	2	2	2	0.03	Nipped-B-like protein OS=Homo sapiens GN=NIPBL PE=1 SV=2
372	1	UniProt_human	H7BXK9	61	77498	1	1	1	1	0.06	ATP-binding cassette sub-family B member 6, mitochondrial (Fragment) OS=Homo sapiens GN=ABCB6 PE=1 SV=1
373	1	UniProt_human	Q8N1F7	61	93430	2	2	2	2	0.09	Nuclear pore complex protein Nup93 OS=Homo sapiens GN=NUP93 PE=1 SV=2
374	1	UniProt_human	P81605	61	11277	3	3	3	3	1.97	Dermcidin OS=Homo sapiens GN=DCD PE=1 SV=2
16	2	UniProt_human	O60287	60	254227	2	2	2	2	0.03	Nucleolar pre-ribosomal-associated protein 1 OS=Homo sapiens GN=URB1 PE=1 SV=4
100	2	UniProt_human	Q9HCK8	60	290338	2	2	2	2	0.03	Chromodomain-helicase-DNA-binding protein 8 OS=Homo sapiens GN=CHD8 PE=1 SV=5
368	1	UniProt_human	E7EQV9	60	20497	2	2	2	2	0.5	Ribosomal protein L15 (Fragment) OS=Homo sapiens GN=RPL15 PE=1 SV=1
375	1	UniProt_human	Q01650	60	54974	1	1	1	1	0.08	Large neutral amino acids transporter small subunit 1 OS=Homo sapiens GN=SLC7A5 PE=1 SV=2
376	1	UniProt_human	I3L1P8	60	32162	2	2	2	2	0.3	Mitochondrial 2-oxoglutarate/malate carrier protein (Fragment) OS=Homo sapiens GN=SLC25A11 PE=1 SV=1
377	1	UniProt_human	Q9NYP7	60	35270	1	1	1	1	0.13	Elongation of very long chain fatty acids protein 5 OS=Homo sapiens GN=ELOVL5 PE=1 SV=1
378	1	UniProt_human	H0Y3H2	60	184746	1	1	1	1	0.02	ATP-binding cassette sub-family A member 3 OS=Homo sapiens GN=ABCA3 PE=1 SV=1
379	1	UniProt_human	P55268	60	195854	1	1	1	1	0.02	Laminin subunit beta-2 OS=Homo sapiens GN=LAMB2 PE=1 SV=2
380	1	UniProt_human	Q96JI7-2	60	236339	3	3	3	3	0.06	Isoform 2 of Spatacsin OS=Homo sapiens GN=SPG11
381	1	UniProt_human	A6NHB5	59	152508	2	2	2	2	0.06	Zinc finger MYM-type protein 3 OS=Homo sapiens GN=ZMYM3 PE=1 SV=1
383	1	UniProt_human	A0A087WW55	59	26605	3	3	2	2	0.37	Trypsin-1 OS=Homo sapiens GN=PRSS1 PE=1 SV=1
384	1	UniProt_human	O75976	58	152835	1	1	1	1	0.03	Carboxypeptidase D OS=Homo sapiens GN=CPD PE=1 SV=2
385	1	UniProt_human	F8VR31	58	98582	1	1	1	1	0.04	DNA replication ATP-dependent helicase/nuclease DNA2 OS=Homo sapiens GN=DNA2 PE=1 SV=3
386	1	UniProt_human	O15042	58	118219	2	2	2	2	0.07	U2 snRNP-associated SURP motif-containing protein OS=Homo sapiens GN=U2SURP PE=1 SV=2
387	1	UniProt_human	A0A075B6P5	58	12948	1	1	1	1	0.37	Protein IGKV2-28 (Fragment) OS=Homo sapiens GN=IGKV2D-28 PE=1 SV=1
388	1	UniProt_human	G3XAI2	58	200347	2	2	2	2	0.04	Laminin subunit beta-1 OS=Homo sapiens GN=LAMB1 PE=1 SV=1
389	1	UniProt_human	A0A075B6Z2	58	2220	6	6	1	1	4.07	Protein TRAJ56 (Fragment) OS=Homo sapiens GN=TRAJ56 PE=4 SV=1
390	1	UniProt_human	O15014	57	151098	3	3	3	3	0.09	Zinc finger protein 609 OS=Homo sapiens GN=ZNF609 PE=1 SV=2
391	1	UniProt_human	J3QK89	57	104868	1	1	1	1	0.04	Calcium homeostasis endoplasmic reticulum protein OS=Homo sapiens GN=CHERP PE=1 SV=1
392	1	UniProt_human	A0A0A0MTP7	57	105949	1	1	1	1	0.04	Protein SCAF11 OS=Homo sapiens GN=SCAF11 PE=1 SV=1
382	1	UniProt_human	Q14669	56	220296	3	3	2	2	0.04	E3 ubiquitin-protein ligase TRIP12 OS=Homo sapiens GN=TRIP12 PE=1 SV=1
393	1	UniProt_human	O95613	56	377806	3	3	3	3	0.03	Pericentrin OS=Homo sapiens GN=PCNT PE=1 SV=4
394	1	UniProt_human	E9PJA7	56	52886	2	2	2	2	0.17	Bcl-2-associated transcription factor 1 OS=Homo sapiens GN=BCLAF1 PE=1 SV=1
395	1	UniProt_human	O15085	56	167601	2	2	2	2	0.05	Rho guanine nucleotide exchange factor 11 OS=Homo sapiens GN=ARHGEF11 PE=1 SV=1
396	1	UniProt_human	H0Y2M0	56	154649	2	2	2	2	0.06	Transmembrane protein 131-like (Fragment) OS=Homo sapiens GN=KIAA0922 PE=1 SV=1
397	1	UniProt_human	O60725	56	31917	4	4	2	2	0.3	Protein-S-isoprenylcysteine O-methyltransferase OS=Homo sapiens GN=ICMT PE=1 SV=1
398	1	UniProt_human	A0A0U1RQH7	56	26682	3	3	2	2	0.37	RNA-binding protein 39 (Fragment) OS=Homo sapiens GN=RBM39 PE=1 SV=1
355	2	UniProt_human	A0A0U1RQN6	55	128516	2	2	2	2	0.07	Ankyrin-2 (Fragment) OS=Homo sapiens GN=ANK2 PE=1 SV=2
400	1	UniProt_human	C9IZL7	55	23658	1	1	1	1	0.19	Non-POU domain-containing octamer-binding protein (Fragment) OS=Homo sapiens GN=NONO PE=1 SV=1
399	1	UniProt_human	Q9UG01	54	197451	4	4	3	3	0.07	Intraflagellar transport protein 172 homolog OS=Homo sapiens GN=IFT172 PE=1 SV=2
401	1	UniProt_human	Q9UKA4	54	210380	1	1	1	1	0.02	A-kinase anchor protein 11 OS=Homo sapiens GN=AKAP11 PE=1 SV=1
402	1	UniProt_human	A2RRE0	54	89287	1	1	1	1	0.05	WD repeat-containing protein 7 OS=Homo sapiens GN=WDR7 PE=1 SV=1
403	1	UniProt_human	O75400	54	108737	1	1	1	1	0.04	Pre-mRNA-processing factor 40 homolog A OS=Homo sapiens GN=PRPF40A PE=1 SV=2
404	1	UniProt_human	Q9BQS8	54	166879	1	1	1	1	0.03	FYVE and coiled-coil domain-containing protein 1 OS=Homo sapiens GN=FYCO1 PE=1 SV=3
405	1	UniProt_human	Q14966-5	54	119221	1	1	1	1	0.04	Isoform 5 of Zinc finger protein 638 OS=Homo sapiens GN=ZNF638
406	1	UniProt_human	Q9P2R6	53	172317	2	2	2	2	0.05	Arginine-glutamic acid dipeptide repeats protein OS=Homo sapiens GN=RERE PE=1 SV=2
407	1	UniProt_human	Q9HCD6	53	219512	2	2	2	2	0.04	Protein TANC2 OS=Homo sapiens GN=TANC2 PE=1 SV=3
408	1	UniProt_human	P05089	52	34713	1	1	1	1	0.13	Arginase-1 OS=Homo sapiens GN=ARG1 PE=1 SV=2
409	1	UniProt_human	E9PCY5	52	130398	1	1	1	1	0.03	DNA topoisomerase 2 (Fragment) OS=Homo sapiens GN=TOP2B PE=1 SV=1
410	1	UniProt_human	K7EQ23	52	108104	1	1	1	1	0.04	Niemann-Pick C1 protein (Fragment) OS=Homo sapiens GN=NPC1 PE=1 SV=1
411	1	UniProt_human	A0A087WW77	52	114355	1	1	1	1	0.04	Lethal(2) giant larvae protein homolog 1 OS=Homo sapiens GN=LLGL1 PE=1 SV=1
412	1	UniProt_human	Q13395	52	181559	2	2	2	2	0.05	Probable methyltransferase TARBP1 OS=Homo sapiens GN=TARBP1 PE=1 SV=1
413	1	UniProt_human	Q5VUA4	51	250958	1	1	1	1	0.02	Zinc finger protein 318 OS=Homo sapiens GN=ZNF318 PE=1 SV=2
414	1	UniProt_human	H7BY10	51	17792	1	1	1	1	0.26	60S ribosomal protein L23a (Fragment) OS=Homo sapiens GN=RPL23A PE=1 SV=1
415	1	UniProt_human	Q5VU77	51	37938	1	1	1	1	0.12	Ubiquitin-associated protein 2-like (Fragment) OS=Homo sapiens GN=UBAP2L PE=1 SV=1
416	1	UniProt_human	A0A096LNH6	51	217614	2	2	1	1	0.02	Dedicator of cytokinesis protein 1 OS=Homo sapiens GN=DOCK1 PE=1 SV=1
417	1	UniProt_human	H0YHL6	50	8755	1	1	1	1	0.59	Methionine--tRNA ligase, cytoplasmic (Fragment) OS=Homo sapiens GN=MARS PE=1 SV=1
418	1	UniProt_human	A0A087WU53	50	41504	2	2	1	1	0.11	Magnesium transporter protein 1 OS=Homo sapiens GN=MAGT1 PE=1 SV=1
419	1	UniProt_human	Q02224	49	316219	1	1	1	1	0.01	Centromere-associated protein E OS=Homo sapiens GN=CENPE PE=1 SV=2
420	1	UniProt_human	U3KQG0	49	71439	1	1	1	1	0.06	Threonine--tRNA ligase, mitochondrial OS=Homo sapiens GN=TARS2 PE=1 SV=1
421	1	UniProt_human	Q8NDV7	49	210169	2	2	2	2	0.04	Trinucleotide repeat-containing gene 6A protein OS=Homo sapiens GN=TNRC6A PE=1 SV=2
422	1	UniProt_human	Q9UIW2	49	210933	3	3	3	3	0.06	Plexin-A1 OS=Homo sapiens GN=PLXNA1 PE=1 SV=3
423	1	UniProt_human	H7BXF3	49	15221	1	1	1	1	0.31	Transformer-2 protein homolog beta (Fragment) OS=Homo sapiens GN=TRA2B PE=1 SV=1
424	1	UniProt_human	H3BLU3	49	49975	1	1	1	1	0.09	Protein PRR14L (Fragment) OS=Homo sapiens GN=PRR14L PE=1 SV=1
425	1	UniProt_human	B4DEB1	49	14044	1	1	1	1	0.34	Histone H3 OS=Homo sapiens GN=H3F3A PE=1 SV=1
426	1	UniProt_human	H0YFD6	48	27091	1	1	1	1	0.17	Trifunctional enzyme subunit alpha, mitochondrial (Fragment) OS=Homo sapiens GN=HADHA PE=1 SV=1
427	1	UniProt_human	O60318	48	218267	2	2	2	2	0.04	Germinal-center associated nuclear protein OS=Homo sapiens GN=MCM3AP PE=1 SV=2
428	1	UniProt_human	Q92614-5	48	180383	2	2	2	2	0.05	Isoform 5 of Unconventional myosin-XVIIIa OS=Homo sapiens GN=MYO18A
429	1	UniProt_human	Q5TB53	48	29862	2	2	2	2	0.32	Transmembrane 9 superfamily member (Fragment) OS=Homo sapiens GN=TM9SF3 PE=1 SV=8
430	1	UniProt_human	Q9P219	48	228091	1	1	1	1	0.02	Protein Daple OS=Homo sapiens GN=CCDC88C PE=1 SV=3
431	1	UniProt_human	G3V192	48	17643	1	1	1	1	0.27	Ferritin OS=Homo sapiens GN=FTH1 PE=1 SV=1
432	1	UniProt_human	A0A1B0GWD8	48	248945	1	1	1	1	0.02	Sperm flagellar protein 2 OS=Homo sapiens GN=SPEF2 PE=4 SV=1
433	1	UniProt_human	J3KP16	48	169810	1	1	1	1	0.03	RIMS-binding protein 3C OS=Homo sapiens GN=RIMBP3C PE=4 SV=1
434	1	UniProt_human	F5H269	48	340029	1	1	1	1	0.01	DmX-like protein 1 OS=Homo sapiens GN=DMXL1 PE=1 SV=1
435	1	UniProt_human	B4E1G1	48	17022	1	1	1	1	0.28	Derlin OS=Homo sapiens GN=DERL1 PE=1 SV=1
436	1	UniProt_human	K7ENS1	48	56852	1	1	1	1	0.08	Ectopic P granules protein 5 homolog (Fragment) OS=Homo sapiens GN=EPG5 PE=1 SV=1
437	1	UniProt_human	A0A087WW46	48	122031	2	2	2	2	0.07	Nodal modulator 1 OS=Homo sapiens GN=NOMO1 PE=1 SV=1
438	1	UniProt_human	B3KY94	48	25929	1	1	1	1	0.18	CDP-diacylglycerol--inositol 3-phosphatidyltransferase OS=Homo sapiens GN=CDIPT PE=1 SV=1
439	1	UniProt_human	Q8TEK3	48	184740	1	1	1	1	0.02	Histone-lysine N-methyltransferase, H3 lysine-79 specific OS=Homo sapiens GN=DOT1L PE=1 SV=2
440	1	UniProt_human	F5H055	48	20840	1	1	1	1	0.22	Zinc finger protein 362 (Fragment) OS=Homo sapiens GN=ZNF362 PE=1 SV=1
441	1	UniProt_human	Q9BU76	48	29394	1	1	1	1	0.15	Multiple myeloma tumor-associated protein 2 OS=Homo sapiens GN=MMTAG2 PE=1 SV=1
442	1	UniProt_human	A2A3R7	47	10408	1	1	1	1	0.48	40S ribosomal protein S6 OS=Homo sapiens GN=RPS6 PE=1 SV=1
443	1	UniProt_human	E9PCX7	47	99665	2	2	2	2	0.09	NAD(P) transhydrogenase, mitochondrial OS=Homo sapiens GN=NNT PE=1 SV=1
444	1	UniProt_human	Q7KZ85	47	198949	2	2	1	1	0.02	Transcription elongation factor SPT6 OS=Homo sapiens GN=SUPT6H PE=1 SV=2
445	1	UniProt_human	I3L466	47	122279	1	1	1	1	0.04	CREB-binding protein (Fragment) OS=Homo sapiens GN=CREBBP PE=1 SV=2
446	1	UniProt_human	E9PKU4	47	25578	1	1	1	1	0.18	60S ribosomal protein L8 (Fragment) OS=Homo sapiens GN=RPL8 PE=1 SV=1
447	1	UniProt_human	Q8N122	47	148942	1	1	1	1	0.03	Regulatory-associated protein of mTOR OS=Homo sapiens GN=RPTOR PE=1 SV=1
448	1	UniProt_human	Q5TF39	46	56182	1	1	1	1	0.08	Sodium-dependent glucose transporter 1 OS=Homo sapiens GN=MFSD4B PE=2 SV=1
449	1	UniProt_human	V9GYN6	46	13583	1	1	1	1	0.36	PDZ domain-containing protein 4 OS=Homo sapiens GN=PDZD4 PE=4 SV=1
450	1	UniProt_human	Q5JWR5	46	277179	2	2	2	2	0.03	Protein dopey-1 OS=Homo sapiens GN=DOPEY1 PE=2 SV=1
451	1	UniProt_human	A0A0A0MQQ9	46	81422	1	1	1	1	0.05	Rho GTPase-activating protein 33 OS=Homo sapiens GN=ARHGAP33 PE=1 SV=1
452	1	UniProt_human	A0A0D9SGH0	46	23256	1	1	1	1	0.2	Sodium/hydrogen exchanger 6 (Fragment) OS=Homo sapiens GN=SLC9A6 PE=1 SV=4
453	1	UniProt_human	K7EK20	46	12535	1	1	1	1	0.39	Histone-arginine methyltransferase CARM1 (Fragment) OS=Homo sapiens GN=CARM1 PE=1 SV=1
454	1	UniProt_human	J3KSR8	46	16441	1	1	1	1	0.29	Serine/arginine-rich-splicing factor 1 (Fragment) OS=Homo sapiens GN=SRSF1 PE=1 SV=1
455	1	UniProt_human	H7C1I0	45	38241	2	2	1	1	0.12	Solute carrier family 35 member E1 (Fragment) OS=Homo sapiens GN=SLC35E1 PE=1 SV=2
456	1	UniProt_human	Q5T760	45	42291	2	2	1	1	0.1	Serine/arginine-rich-splicing factor 11 (Fragment) OS=Homo sapiens GN=SRSF11 PE=1 SV=1
457	1	UniProt_human	C9J9C1	45	43168	1	1	1	1	0.1	Serine/threonine-protein phosphatase 2A 65 kDa regulatory subunit A alpha isoform (Fragment) OS=Homo sapiens GN=PPP2R1A PE=1 SV=2
458	1	UniProt_human	Q9BY89	45	196590	1	1	1	1	0.02	Uncharacterized protein KIAA1671 OS=Homo sapiens GN=KIAA1671 PE=1 SV=2
189	2	UniProt_human	A0A0C4DFM7	44	185135	2	2	2	2	0.05	Terminal uridylyltransferase 4 OS=Homo sapiens GN=ZCCHC11 PE=1 SV=1
459	1	UniProt_human	C9J5X1	44	154691	2	2	2	2	0.06	Tyrosine-protein kinase receptor OS=Homo sapiens GN=IGF1R PE=1 SV=1
460	1	UniProt_human	F8WDS9	44	9277	1	1	1	1	0.55	LanC-like protein 1 OS=Homo sapiens GN=LANCL1 PE=1 SV=1
461	1	UniProt_human	Q66K14	44	140436	2	2	2	2	0.06	TBC1 domain family member 9B OS=Homo sapiens GN=TBC1D9B PE=1 SV=3
462	1	UniProt_human	F5H385	43	34542	1	1	1	1	0.13	Zinc transporter ZIP3 OS=Homo sapiens GN=SLC39A3 PE=1 SV=1
463	1	UniProt_human	A0A087WUS0	43	15343	2	2	1	1	0.31	40S ribosomal protein S24 OS=Homo sapiens GN=RPS24 PE=1 SV=1
464	1	UniProt_human	P13639	43	95277	1	1	1	1	0.05	Elongation factor 2 OS=Homo sapiens GN=EEF2 PE=1 SV=4
465	1	UniProt_human	P33947	43	24406	3	3	2	2	0.41	ER lumen protein-retaining receptor 2 OS=Homo sapiens GN=KDELR2 PE=1 SV=1
466	1	UniProt_human	H0Y7S3	43	121189	1	1	1	1	0.04	Plasma membrane calcium-transporting ATPase 2 (Fragment) OS=Homo sapiens GN=ATP2B2 PE=1 SV=1
467	1	UniProt_human	Q5SYE7	43	170563	1	1	1	1	0.03	NHS-like protein 1 OS=Homo sapiens GN=NHSL1 PE=1 SV=2
468	1	UniProt_human	Q07065	42	65983	1	1	1	1	0.07	Cytoskeleton-associated protein 4 OS=Homo sapiens GN=CKAP4 PE=1 SV=2
469	1	UniProt_human	C9J7S3	42	19856	1	1	1	1	0.23	Aspartate--tRNA ligase, cytoplasmic (Fragment) OS=Homo sapiens GN=DARS PE=1 SV=8
470	1	UniProt_human	Q8N3P4	41	161650	1	1	1	1	0.03	Vacuolar protein sorting-associated protein 8 homolog OS=Homo sapiens GN=VPS8 PE=1 SV=3
471	1	UniProt_human	A0A075B6R8	41	63776	1	1	1	1	0.07	Multiple PDZ domain protein (Fragment) OS=Homo sapiens GN=MPDZ PE=1 SV=1
472	1	UniProt_human	Q8N357	41	40188	1	1	1	1	0.11	Solute carrier family 35 member F6 OS=Homo sapiens GN=SLC35F6 PE=1 SV=1
473	1	UniProt_human	O75443	40	239370	1	1	1	1	0.02	Alpha-tectorin OS=Homo sapiens GN=TECTA PE=1 SV=3
474	1	UniProt_human	E7EVK1	40	116300	1	1	1	1	0.04	Nuclear receptor corepressor 1 (Fragment) OS=Homo sapiens GN=NCOR1 PE=1 SV=2
475	1	UniProt_human	Q5VV87	40	14370	1	1	1	1	0.34	Microsomal glutathione S-transferase 3 OS=Homo sapiens GN=MGST3 PE=1 SV=1
476	1	UniProt_human	F8WF32	40	12688	1	1	1	1	0.39	Dolichyl-diphosphooligosaccharide--protein glycosyltransferase subunit 1 OS=Homo sapiens GN=RPN1 PE=1 SV=1
477	1	UniProt_human	H3BMH3	39	33267	1	1	1	1	0.13	WD repeat-containing protein 59 (Fragment) OS=Homo sapiens GN=WDR59 PE=1 SV=8
478	1	UniProt_human	D6RJ98	39	21799	1	1	1	1	0.21	Phosphoinositide 3-kinase regulatory subunit 4 (Fragment) OS=Homo sapiens GN=PIK3R4 PE=1 SV=1
479	1	UniProt_human	H7C1G6	38	26743	1	1	1	1	0.17	Autophagy-related protein 9A (Fragment) OS=Homo sapiens GN=ATG9A PE=1 SV=1
480	1	UniProt_human	Q9ULL5	38	129911	1	1	1	1	0.03	Proline-rich protein 12 OS=Homo sapiens GN=PRR12 PE=1 SV=2
481	1	UniProt_human	P01023	37	163188	1	1	1	1	0.03	Alpha-2-macroglobulin OS=Homo sapiens GN=A2M PE=1 SV=3
482	1	UniProt_human	E9PHX8	37	90964	2	2	2	2	0.1	Tyrosine-protein kinase Mer OS=Homo sapiens GN=MERTK PE=1 SV=1
483	1	UniProt_human	D6RA96	37	86731	2	2	1	1	0.05	Regulator of telomere elongation helicase 1 OS=Homo sapiens GN=RTEL1-TNFRSF6B PE=3 SV=1
484	1	UniProt_human	F8WJN3	37	52238	1	1	1	1	0.08	Cleavage and polyadenylation-specificity factor subunit 6 OS=Homo sapiens GN=CPSF6 PE=1 SV=1
485	1	UniProt_human	Q9H307	37	81565	1	1	1	1	0.05	Pinin OS=Homo sapiens GN=PNN PE=1 SV=4
486	1	UniProt_human	Q8N766	36	111689	1	1	1	1	0.04	ER membrane protein complex subunit 1 OS=Homo sapiens GN=EMC1 PE=1 SV=1
487	1	UniProt_human	E7EQG2	36	41264	1	1	1	1	0.11	Eukaryotic initiation factor 4A-II OS=Homo sapiens GN=EIF4A2 PE=1 SV=1
488	1	UniProt_human	P04035	36	97413	1	1	1	1	0.04	3-hydroxy-3-methylglutaryl-coenzyme A reductase OS=Homo sapiens GN=HMGCR PE=1 SV=1
489	1	UniProt_human	Q6NTF9	36	39177	1	1	1	1	0.11	Rhomboid domain-containing protein 2 OS=Homo sapiens GN=RHBDD2 PE=2 SV=2
490	1	UniProt_human	A0A075B6N8	36	41300	1	1	1	1	0.11	Ig gamma-3 chain C region (Fragment) OS=Homo sapiens GN=IGHG3 PE=1 SV=1
491	1	UniProt_human	A0A087WT87	36	54173	1	1	1	1	0.08	Amino acid transporter OS=Homo sapiens GN=SLC1A3 PE=1 SV=1
492	1	UniProt_human	Q5T4U5	35	50238	1	1	1	1	0.09	Acyl-Coenzyme A dehydrogenase, C-4 to C-12 straight chain, isoform CRA_a OS=Homo sapiens GN=ACADM PE=1 SV=1
493	1	UniProt_human	H7C0U0	35	17708	2	2	1	1	0.26	Rhomboid-like protein (Fragment) OS=Homo sapiens GN=PARL PE=1 SV=1
494	1	UniProt_human	O00443	35	190559	1	1	1	1	0.02	Phosphatidylinositol 4-phosphate 3-kinase C2 domain-containing subunit alpha OS=Homo sapiens GN=PIK3C2A PE=1 SV=2
495	1	UniProt_human	Q96PE2	35	221535	1	1	1	1	0.02	Rho guanine nucleotide exchange factor 17 OS=Homo sapiens GN=ARHGEF17 PE=1 SV=1
496	1	UniProt_human	C9JNW5	34	17532	1	1	1	1	0.27	60S ribosomal protein L24 OS=Homo sapiens GN=RPL24 PE=1 SV=1
497	1	UniProt_human	P11274	34	142730	1	1	1	1	0.03	Breakpoint cluster region protein OS=Homo sapiens GN=BCR PE=1 SV=2
498	1	UniProt_human	A0A087WXU3	34	102308	1	1	1	1	0.04	Extended synaptotagmin-2 OS=Homo sapiens GN=ESYT2 PE=1 SV=1
499	1	UniProt_human	Q9BTX1	34	76255	1	1	1	1	0.06	Nucleoporin NDC1 OS=Homo sapiens GN=NDC1 PE=1 SV=2
500	1	UniProt_human	O60942	33	68513	1	1	1	1	0.06	mRNA-capping enzyme OS=Homo sapiens GN=RNGTT PE=1 SV=1
501	1	UniProt_human	P03891	31	38935	1	1	1	1	0.11	NADH-ubiquinone oxidoreductase chain 2 OS=Homo sapiens GN=MT-ND2 PE=1 SV=2
502	1	UniProt_human	H0YB39	31	30476	1	1	1	1	0.15	Heterogeneous nuclear ribonucleoprotein H (Fragment) OS=Homo sapiens GN=HNRNPH1 PE=1 SV=1
503	1	UniProt_human	Q96P70	30	115889	1	1	1	1	0.04	Importin-9 OS=Homo sapiens GN=IPO9 PE=1 SV=3
504	1	UniProt_human	H0Y7A3	28	16334	1	1	1	1	0.29	Guanine nucleotide exchange factor DBS (Fragment) OS=Homo sapiens GN=MCF2L PE=1 SV=1
505	1	UniProt_human	A0A096LPC5	28	147065	1	1	1	1	0.03	WASH complex subunit FAM21C OS=Homo sapiens GN=FAM21C PE=1 SV=1
