# Supplementary material for: FER-mediated phosphorylation and PIK3R2 recruitment on IRS4 promotes AKT activation and tumorigenesis in ovarian cancer cells
Source: eLife. 2022 May 12;11:e76183. doi: 10.7554/eLife.76183 (PMC9098222; doi:10.7554/eLife.76183)
Supplement: Supplementary file 7. — Identification of novel substrates for tyrosine kinase FER by pTyr immunoprecipitation and on beads tryptic digestion followed by mass spectrometry analysis in Figure 1B. The details of raw data analysis and database search have been described in the section of Materials and methods. The analyzed MS data is provided in this file. [file elife-76183-supp7.xlsx]

## Sheet: Sheet1
Family	M	DB	Accession	Score	Mass	Matches	Match(sig)	Sequences	Seq(sig)	↓emPAI	Description
1	1	UniProt_human	P16591	8421	94578	322	322	29	29	5.88	Tyrosine-protein kinase Fer OS=Homo sapiens GN=FER PE=1 SV=2
2	1	UniProt_human	P13645	6448	58792	211	211	34	34	38.17	Keratin, type I cytoskeletal 10 OS=Homo sapiens GN=KRT10 PE=1 SV=6
3	1	UniProt_human	P35908	5995	65393	200	200	44	44	28.01	Keratin, type II cytoskeletal 2 epidermal OS=Homo sapiens GN=KRT2 PE=1 SV=2
3	2	UniProt_human	P04264	4158	65999	167	167	39	39	20.7	Keratin, type II cytoskeletal 1 OS=Homo sapiens GN=KRT1 PE=1 SV=6
4	1	UniProt_human	P35527	3302	62027	112	112	31	31	12.36	Keratin, type I cytoskeletal 9 OS=Homo sapiens GN=KRT9 PE=1 SV=3
5	1	UniProt_human	Q9Y2A7	2548	128707	106	106	35	35	2.17	Nck-associated protein 1 OS=Homo sapiens GN=NCKAP1 PE=1 SV=1
6	1	UniProt_human	P09874	1913	113012	81	81	29	29	1.97	Poly [ADP-ribose] polymerase 1 OS=Homo sapiens GN=PARP1 PE=1 SV=4
2	2	UniProt_human	P02533	1676	51529	54	54	19	19	5.6	Keratin, type I cytoskeletal 14 OS=Homo sapiens GN=KRT14 PE=1 SV=4
7	1	UniProt_human	Q05397	1428	119157	84	84	29	29	1.91	Focal adhesion kinase 1 OS=Homo sapiens GN=PTK2 PE=1 SV=2
8	1	UniProt_human	P19338	1342	76568	53	53	23	23	2.57	Nucleolin OS=Homo sapiens GN=NCL PE=1 SV=3
9	1	UniProt_human	P05023-3	1277	109480	50	50	24	24	1.64	Isoform 3 of Sodium/potassium-transporting ATPase subunit alpha-1 OS=Homo sapiens GN=ATP1A1
3	3	UniProt_human	P13647	1196	62340	67	67	27	27	6.15	Keratin, type II cytoskeletal 5 OS=Homo sapiens GN=KRT5 PE=1 SV=3
3	4	UniProt_human	P04259	1160	60030	59	59	19	19	3.39	Keratin, type II cytoskeletal 6B OS=Homo sapiens GN=KRT6B PE=1 SV=5
10	1	UniProt_human	P55884	1078	92424	50	50	20	20	1.62	Eukaryotic translation initiation factor 3 subunit B OS=Homo sapiens GN=EIF3B PE=1 SV=3
3	5	UniProt_human	P02538	1022	60008	48	48	18	18	2.81	Keratin, type II cytoskeletal 6A OS=Homo sapiens GN=KRT6A PE=1 SV=3
2	3	UniProt_human	P08779	961	51236	39	39	17	17	3.79	Keratin, type I cytoskeletal 16 OS=Homo sapiens GN=KRT16 PE=1 SV=4
11	1	UniProt_human	P53396	955	120762	35	35	20	20	1.02	ATP-citrate synthase OS=Homo sapiens GN=ACLY PE=1 SV=3
12	1	UniProt_human	O95373	952	119440	35	35	17	17	0.83	Importin-7 OS=Homo sapiens GN=IPO7 PE=1 SV=1
13	1	UniProt_human	Q99613	889	105278	48	48	20	20	1.33	Eukaryotic translation initiation factor 3 subunit C OS=Homo sapiens GN=EIF3C PE=1 SV=1
14	1	UniProt_human	P16615	852	114683	25	25	15	15	0.74	Sarcoplasmic/endoplasmic reticulum calcium ATPase 2 OS=Homo sapiens GN=ATP2A2 PE=1 SV=1
15	1	UniProt_human	O00410	851	123550	44	44	16	16	0.79	Importin-5 OS=Homo sapiens GN=IPO5 PE=1 SV=4
16	1	UniProt_human	P22102	763	107699	34	34	18	18	1.11	Trifunctional purine biosynthetic protein adenosine-3 OS=Homo sapiens GN=GART PE=1 SV=1
2	4	UniProt_human	K7ERE3	584	45232	24	24	6	6	1.11	Keratin, type I cytoskeletal 13 OS=Homo sapiens GN=KRT13 PE=1 SV=1
17	1	UniProt_human	Q16531	580	126887	30	30	16	16	0.71	DNA damage-binding protein 1 OS=Homo sapiens GN=DDB1 PE=1 SV=1
2	5	UniProt_human	Q7Z3Y7	565	50536	33	33	5	5	1.12	Keratin, type I cytoskeletal 28 OS=Homo sapiens GN=KRT28 PE=1 SV=2
18	1	UniProt_human	Q15386	562	123844	31	31	17	17	0.79	Ubiquitin-protein ligase E3C OS=Homo sapiens GN=UBE3C PE=1 SV=3
19	1	UniProt_human	Q9UDR5	530	102066	23	23	14	14	0.79	Alpha-aminoadipic semialdehyde synthase, mitochondrial OS=Homo sapiens GN=AASS PE=1 SV=1
20	1	UniProt_human	O43156	516	121992	14	14	9	9	0.42	TELO2-interacting protein 1 homolog OS=Homo sapiens GN=TTI1 PE=1 SV=3
21	1	UniProt_human	P22314	509	117774	19	19	9	9	0.38	Ubiquitin-like modifier-activating enzyme 1 OS=Homo sapiens GN=UBA1 PE=1 SV=3
22	1	UniProt_human	P33176	488	109617	22	22	16	16	0.86	Kinesin-1 heavy chain OS=Homo sapiens GN=KIF5B PE=1 SV=1
23	1	UniProt_human	Q14694	482	87080	23	23	11	11	0.71	Ubiquitin carboxyl-terminal hydrolase 10 OS=Homo sapiens GN=USP10 PE=1 SV=2
3	6	UniProt_human	P19013	466	57250	17	17	3	3	0.25	Keratin, type II cytoskeletal 4 OS=Homo sapiens GN=KRT4 PE=1 SV=4
3	7	UniProt_human	Q7Z794	464	61864	26	26	6	6	0.85	Keratin, type II cytoskeletal 1b OS=Homo sapiens GN=KRT77 PE=2 SV=3
24	1	UniProt_human	O43795-2	443	124872	28	28	18	18	0.91	Isoform 2 of Unconventional myosin-Ib OS=Homo sapiens GN=MYO1B
25	1	UniProt_human	O15084	424	112894	14	14	8	8	0.35	Serine/threonine-protein phosphatase 6 regulatory ankyrin repeat subunit A OS=Homo sapiens GN=ANKRD28 PE=1 SV=5
2	6	UniProt_human	Q7Z3Y8	409	49792	17	17	4	4	0.66	Keratin, type I cytoskeletal 27 OS=Homo sapiens GN=KRT27 PE=1 SV=2
26	1	UniProt_human	P42285	404	117729	23	23	14	14	0.66	Superkiller viralicidic activity 2-like 2 OS=Homo sapiens GN=SKIV2L2 PE=1 SV=3
27	1	UniProt_human	Q68E01	378	117994	15	15	12	12	0.54	Integrator complex subunit 3 OS=Homo sapiens GN=INTS3 PE=1 SV=1
28	1	UniProt_human	Q9Y2L1	364	108934	11	11	8	8	0.37	Exosome complex exonuclease RRP44 OS=Homo sapiens GN=DIS3 PE=1 SV=2
29	1	UniProt_human	Q92598	360	96804	13	13	10	10	0.55	Heat shock protein 105 kDa OS=Homo sapiens GN=HSPH1 PE=1 SV=1
30	1	UniProt_human	Q96P70	353	115889	12	12	7	7	0.34	Importin-9 OS=Homo sapiens GN=IPO9 PE=1 SV=3
31	1	UniProt_human	O15397	327	119861	18	18	10	10	0.43	Importin-8 OS=Homo sapiens GN=IPO8 PE=1 SV=2
32	1	UniProt_human	Q5JP53	303	47736	9	9	4	4	0.42	Tubulin beta chain OS=Homo sapiens GN=TUBB PE=1 SV=1
33	1	UniProt_human	Q9BZQ6	303	104598	9	9	7	7	0.33	ER degradation-enhancing alpha-mannosidase-like protein 3 OS=Homo sapiens GN=EDEM3 PE=1 SV=2
34	1	UniProt_human	Q5VY60	296	91071	11	11	6	6	0.32	HAUS augmin-like complex subunit 6 OS=Homo sapiens GN=HAUS6 PE=1 SV=1
35	1	UniProt_human	Q8NE71	287	95866	16	16	12	12	0.7	ATP-binding cassette sub-family F member 1 OS=Homo sapiens GN=ABCF1 PE=1 SV=2
36	1	UniProt_human	E9PG71	285	105648	11	11	8	8	0.38	Ephrin type-A receptor 4 OS=Homo sapiens GN=EPHA4 PE=1 SV=1
37	1	UniProt_human	Q15029	279	109366	11	11	8	8	0.36	116 kDa U5 small nuclear ribonucleoprotein component OS=Homo sapiens GN=EFTUD2 PE=1 SV=1
38	1	UniProt_human	P51530-4	270	119427	11	11	10	10	0.43	Isoform 4 of DNA replication ATP-dependent helicase/nuclease DNA2 OS=Homo sapiens GN=DNA2
2	7	UniProt_human	Q04695	269	48076	15	15	8	8	1.02	Keratin, type I cytoskeletal 17 OS=Homo sapiens GN=KRT17 PE=1 SV=2
39	1	UniProt_human	J3KPF3	269	68059	9	9	8	8	0.65	4F2 cell-surface antigen heavy chain OS=Homo sapiens GN=SLC3A2 PE=1 SV=1
40	1	UniProt_human	P19367	268	102420	17	17	12	12	0.64	Hexokinase-1 OS=Homo sapiens GN=HK1 PE=1 SV=3
41	1	UniProt_human	A0A0C4DGB6	261	69181	11	11	3	3	0.2	Serum albumin OS=Homo sapiens GN=ALB PE=1 SV=1
42	1	UniProt_human	Q02413	256	113676	8	8	5	5	0.21	Desmoglein-1 OS=Homo sapiens GN=DSG1 PE=1 SV=2
43	1	UniProt_human	B5MBZ0	222	110109	8	8	6	6	0.26	Echinoderm microtubule-associated protein-like 4 OS=Homo sapiens GN=EML4 PE=1 SV=3
44	1	UniProt_human	Q96D09	222	93715	6	6	5	5	0.25	G-protein coupled receptor-associated sorting protein 2 OS=Homo sapiens GN=GPRASP2 PE=1 SV=1
45	1	UniProt_human	A0A087WVQ6	221	191936	8	8	6	6	0.14	Clathrin heavy chain OS=Homo sapiens GN=CLTC PE=1 SV=1
40	2	UniProt_human	E9PB90	204	98909	11	11	6	6	0.29	Hexokinase-2 OS=Homo sapiens GN=HK2 PE=1 SV=1
46	1	UniProt_human	P06213	198	156232	6	6	5	5	0.15	Insulin receptor OS=Homo sapiens GN=INSR PE=1 SV=4
47	1	UniProt_human	Q9BPX3	193	114262	9	9	5	5	0.2	Condensin complex subunit 3 OS=Homo sapiens GN=NCAPG PE=1 SV=1
48	1	UniProt_human	A0A0C4DGA6	180	113786	8	8	6	6	0.25	Helicase-like transcription factor OS=Homo sapiens GN=HLTF PE=1 SV=1
49	1	UniProt_human	O14654	173	133685	7	7	7	7	0.25	Insulin receptor substrate 4 OS=Homo sapiens GN=IRS4 PE=1 SV=1
50	1	UniProt_human	F5H5D3	171	57693	5	5	4	4	0.34	Tubulin alpha chain OS=Homo sapiens GN=TUBA1C PE=1 SV=1
51	1	UniProt_human	J3QS39	167	10463	5	5	2	2	1.19	Polyubiquitin-B (Fragment) OS=Homo sapiens GN=UBB PE=1 SV=1
52	1	UniProt_human	Q96QU8	152	128801	7	7	5	5	0.18	Exportin-6 OS=Homo sapiens GN=XPO6 PE=1 SV=1
53	1	UniProt_human	P12273	150	16562	3	3	1	1	0.29	Prolactin-inducible protein OS=Homo sapiens GN=PIP PE=1 SV=1
54	1	UniProt_human	Q71RC2	144	80546	5	5	4	4	0.23	La-related protein 4 OS=Homo sapiens GN=LARP4 PE=1 SV=3
55	1	UniProt_human	P15924-2	143	259957	7	7	5	5	0.09	Isoform DPII of Desmoplakin OS=Homo sapiens GN=DSP
56	1	UniProt_human	V9GYM8	141	115999	7	7	6	6	0.25	Rho guanine nucleotide exchange factor 2 OS=Homo sapiens GN=ARHGEF2 PE=1 SV=1
29	2	UniProt_human	A0A087WYC1	140	78556	5	5	5	5	0.31	Heat shock 70 kDa protein 4 OS=Homo sapiens GN=HSPA4 PE=1 SV=1
57	1	UniProt_human	Q00839	140	90528	4	4	3	3	0.15	Heterogeneous nuclear ribonucleoprotein U OS=Homo sapiens GN=HNRNPU PE=1 SV=6
58	1	UniProt_human	P07814	140	170483	3	3	3	3	0.08	Bifunctional glutamate/proline--tRNA ligase OS=Homo sapiens GN=EPRS PE=1 SV=5
59	1	UniProt_human	Q8TEX9	123	118640	4	4	3	3	0.11	Importin-4 OS=Homo sapiens GN=IPO4 PE=1 SV=2
60	1	UniProt_human	F8WDV0	114	99643	5	5	4	4	0.19	Importin-11 OS=Homo sapiens GN=IPO11 PE=1 SV=1
61	1	UniProt_human	P56945	111	93314	3	3	3	3	0.15	Breast cancer anti-estrogen resistance protein 1 OS=Homo sapiens GN=BCAR1 PE=1 SV=2
62	1	UniProt_human	Q08554	111	99924	3	3	2	2	0.09	Desmocollin-1 OS=Homo sapiens GN=DSC1 PE=1 SV=2
63	1	UniProt_human	Q5D862	110	247928	3	3	2	2	0.03	Filaggrin-2 OS=Homo sapiens GN=FLG2 PE=1 SV=1
64	1	UniProt_human	A0A0A0MRA5	109	85887	4	4	4	4	0.22	Heterogeneous nuclear ribonucleoprotein U-like protein 1 OS=Homo sapiens GN=HNRNPUL1 PE=1 SV=1
65	1	UniProt_human	Q8TEK3	108	184740	4	4	1	1	0.02	Histone-lysine N-methyltransferase, H3 lysine-79 specific OS=Homo sapiens GN=DOT1L PE=1 SV=2
3	8	UniProt_human	Q8N1N4	103	56830	7	7	6	6	0.56	Keratin, type II cytoskeletal 78 OS=Homo sapiens GN=KRT78 PE=2 SV=2
66	1	UniProt_human	Q9H9Y6	103	128146	7	7	4	4	0.14	DNA-directed RNA polymerase I subunit RPA2 OS=Homo sapiens GN=POLR1B PE=1 SV=2
67	1	UniProt_human	Q12965	100	126982	5	5	5	5	0.18	Unconventional myosin-Ie OS=Homo sapiens GN=MYO1E PE=1 SV=2
68	1	UniProt_human	J3KQG3	95	110317	2	2	1	1	0.04	EPH receptor A10, isoform CRA_b OS=Homo sapiens GN=EPHA10 PE=1 SV=1
69	1	UniProt_human	F8VVM2	90	36138	3	3	2	2	0.26	Phosphate carrier protein, mitochondrial OS=Homo sapiens GN=SLC25A3 PE=1 SV=1
70	1	UniProt_human	H0YKS4	89	19518	3	3	2	2	0.53	Annexin (Fragment) OS=Homo sapiens GN=ANXA2 PE=1 SV=1
71	1	UniProt_human	P81605	88	11277	4	4	2	2	1.07	Dermcidin OS=Homo sapiens GN=DCD PE=1 SV=2
72	1	UniProt_human	Q08211	88	140869	1	1	1	1	0.03	ATP-dependent RNA helicase A OS=Homo sapiens GN=DHX9 PE=1 SV=4
73	1	UniProt_human	P13473	87	44932	1	1	1	1	0.1	Lysosome-associated membrane glycoprotein 2 OS=Homo sapiens GN=LAMP2 PE=1 SV=2
74	1	UniProt_human	U3KQK0	85	18792	1	1	1	1	0.25	Histone H2B OS=Homo sapiens GN=HIST1H2BN PE=1 SV=1
77	1	UniProt_human	A0A087WVZ5	78	21146	2	2	2	2	0.48	Cytoplasmic FMR1-interacting protein 1 (Fragment) OS=Homo sapiens GN=CYFIP1 PE=1 SV=1
76	1	UniProt_human	A2A437	78	27934	1	1	1	1	0.16	Receptor-type tyrosine-protein phosphatase F (Fragment) OS=Homo sapiens GN=PTPRF PE=1 SV=1
75	1	UniProt_human	A0A087WWJ1	78	121040	4	4	3	3	0.11	DNA mismatch repair protein Msh6 OS=Homo sapiens GN=MSH6 PE=1 SV=1
78	1	UniProt_human	B4DN67	77	72676	1	1	1	1	0.06	Kin of IRRE-like protein 1 OS=Homo sapiens GN=KIRREL PE=1 SV=1
79	1	UniProt_human	C9J5X1	77	154691	3	3	2	2	0.06	Tyrosine-protein kinase receptor OS=Homo sapiens GN=IGF1R PE=1 SV=1
80	1	UniProt_human	Q15393	76	135492	3	3	2	2	0.06	Splicing factor 3B subunit 3 OS=Homo sapiens GN=SF3B3 PE=1 SV=4
81	1	UniProt_human	A0A0A0MRH8	75	69112	6	6	4	4	0.28	Chromodomain-helicase-DNA-binding protein 1-like OS=Homo sapiens GN=CHD1L PE=1 SV=1
83	1	UniProt_human	F8WAV7	74	16855	4	4	3	3	1.09	Integrator complex subunit 6 OS=Homo sapiens GN=INTS6 PE=1 SV=1
82	1	UniProt_human	P46087	74	89247	4	4	4	4	0.21	Probable 28S rRNA (cytosine(4447)-C(5))-methyltransferase OS=Homo sapiens GN=NOP2 PE=1 SV=2
84	1	UniProt_human	O14964	73	86138	2	2	1	1	0.05	Hepatocyte growth factor-regulated tyrosine kinase substrate OS=Homo sapiens GN=HGS PE=1 SV=1
85	1	UniProt_human	Q15459	71	88831	2	2	2	2	0.1	Splicing factor 3A subunit 1 OS=Homo sapiens GN=SF3A1 PE=1 SV=1
86	1	UniProt_human	Q15758	71	56562	1	1	1	1	0.08	Neutral amino acid transporter B(0) OS=Homo sapiens GN=SLC1A5 PE=1 SV=2
87	1	UniProt_human	Q5T3N1	69	22741	2	2	2	2	0.44	Annexin (Fragment) OS=Homo sapiens GN=ANXA1 PE=1 SV=1
88	1	UniProt_human	E7ENY0	69	73358	2	2	2	2	0.12	Alpha-adducin OS=Homo sapiens GN=ADD1 PE=1 SV=1
90	1	UniProt_human	A0A0C4DGH5	68	85355	1	1	1	1	0.05	Cullin-associated NEDD8-dissociated protein 1 (Fragment) OS=Homo sapiens GN=CAND1 PE=1 SV=1
89	1	UniProt_human	Q2M3G4	68	90730	1	1	1	1	0.05	Protein Shroom1 OS=Homo sapiens GN=SHROOM1 PE=1 SV=1
91	1	UniProt_human	P52756	68	92097	1	1	1	1	0.05	RNA-binding protein 5 OS=Homo sapiens GN=RBM5 PE=1 SV=2
92	1	UniProt_human	O60341	68	92845	2	2	1	1	0.05	Lysine-specific histone demethylase 1A OS=Homo sapiens GN=KDM1A PE=1 SV=2
93	1	UniProt_human	H0YEN2	66	63739	1	1	1	1	0.07	Serine/threonine-protein phosphatase 6 regulatory subunit 3 (Fragment) OS=Homo sapiens GN=PPP6R3 PE=1 SV=1
94	1	UniProt_human	A0A0A0MSX9	64	142198	2	2	2	2	0.06	Isoleucine--tRNA ligase, cytoplasmic OS=Homo sapiens GN=IARS PE=1 SV=1
96	1	UniProt_human	Q00653	62	96689	2	2	2	2	0.09	Nuclear factor NF-kappa-B p100 subunit OS=Homo sapiens GN=NFKB2 PE=1 SV=4
97	1	UniProt_human	G5EA31	62	111914	3	3	2	2	0.08	Protein transport protein Sec24C OS=Homo sapiens GN=SEC24C PE=1 SV=1
95	1	UniProt_human	H7C3P6	62	85734	1	1	1	1	0.05	Nuclear pore complex protein Nup98-Nup96 (Fragment) OS=Homo sapiens GN=NUP98 PE=1 SV=1
98	1	UniProt_human	Q86YZ3	60	282228	2	2	2	2	0.03	Hornerin OS=Homo sapiens GN=HRNR PE=1 SV=2
100	1	UniProt_human	P25311	59	34237	1	1	1	1	0.13	Zinc-alpha-2-glycoprotein OS=Homo sapiens GN=AZGP1 PE=1 SV=2
99	1	UniProt_human	E9PPJ0	59	98109	2	2	1	1	0.04	Splicing factor 3B subunit 2 OS=Homo sapiens GN=SF3B2 PE=1 SV=1
101	1	UniProt_human	H0YI54	57	5049	2	2	1	1	1.2	Keratin, type II cytoskeletal 78 (Fragment) OS=Homo sapiens GN=KRT78 PE=4 SV=2
102	1	UniProt_human	A0A0A0MRQ5	57	10670	1	1	1	1	0.47	Peroxiredoxin-1 OS=Homo sapiens GN=PRDX1 PE=1 SV=1
103	1	UniProt_human	H3BMZ1	57	16153	1	1	1	1	0.29	Very-long-chain (3R)-3-hydroxyacyl-CoA dehydratase 3 (Fragment) OS=Homo sapiens GN=HACD3 PE=1 SV=1
105	1	UniProt_human	Q5JRX3	56	117338	1	1	1	1	0.04	Presequence protease, mitochondrial OS=Homo sapiens GN=PITRM1 PE=1 SV=3
104	1	UniProt_human	Q9Y5B9	56	119838	1	1	1	1	0.04	FACT complex subunit SPT16 OS=Homo sapiens GN=SUPT16H PE=1 SV=1
108	1	UniProt_human	Q9UBG3	55	53502	1	1	1	1	0.08	Cornulin OS=Homo sapiens GN=CRNN PE=1 SV=1
106	1	UniProt_human	Q96JG6	55	111104	2	2	2	2	0.08	Syndetin OS=Homo sapiens GN=VPS50 PE=1 SV=3
107	1	UniProt_human	Q7KZF4	55	101934	1	1	1	1	0.04	Staphylococcal nuclease domain-containing protein 1 OS=Homo sapiens GN=SND1 PE=1 SV=1
109	1	UniProt_human	P10599	54	11730	1	1	1	1	0.42	Thioredoxin OS=Homo sapiens GN=TXN PE=1 SV=3
110	1	UniProt_human	Q5VU77	54	37938	2	2	1	1	0.12	Ubiquitin-associated protein 2-like (Fragment) OS=Homo sapiens GN=UBAP2L PE=1 SV=1
111	1	UniProt_human	P14923	52	81693	2	2	2	2	0.11	Junction plakoglobin OS=Homo sapiens GN=JUP PE=1 SV=3
112	1	UniProt_human	F5H7S7	52	174341	1	1	1	1	0.02	Ras GTPase-activating-like protein IQGAP2 OS=Homo sapiens GN=IQGAP2 PE=1 SV=2
113	1	UniProt_human	H0Y3Z4	51	35717	1	1	1	1	0.13	Nicastrin (Fragment) OS=Homo sapiens GN=NCSTN PE=1 SV=8
114	1	UniProt_human	Q8N766	50	111689	1	1	1	1	0.04	ER membrane protein complex subunit 1 OS=Homo sapiens GN=EMC1 PE=1 SV=1
117	1	UniProt_human	Q8TD19	48	107100	2	2	2	2	0.08	Serine/threonine-protein kinase Nek9 OS=Homo sapiens GN=NEK9 PE=1 SV=2
115	1	UniProt_human	O14980	48	123306	1	1	1	1	0.04	Exportin-1 OS=Homo sapiens GN=XPO1 PE=1 SV=1
116	1	UniProt_human	P53621	48	138258	1	1	1	1	0.03	Coatomer subunit alpha OS=Homo sapiens GN=COPA PE=1 SV=2
118	1	UniProt_human	I3L1U9	47	23830	2	2	2	2	0.42	Actin, cytoplasmic 2 (Fragment) OS=Homo sapiens GN=ACTG1 PE=1 SV=1
119	1	UniProt_human	A0A075B6Z2	46	2220	4	4	1	1	4.07	Protein TRAJ56 (Fragment) OS=Homo sapiens GN=TRAJ56 PE=4 SV=1
120	1	UniProt_human	A0A0B4J293	46	62544	1	1	1	1	0.07	Uncharacterized protein (Fragment) OS=Homo sapiens PE=4 SV=1
124	1	UniProt_human	B4DGZ4	45	17398	1	1	1	1	0.27	Splicing factor 3B subunit 1 OS=Homo sapiens GN=SF3B1 PE=1 SV=1
122	1	UniProt_human	Q9Y4C2	45	102061	1	1	1	1	0.04	TRPM8 channel-associated factor 1 OS=Homo sapiens GN=TCAF1 PE=1 SV=3
123	1	UniProt_human	A0A0C4DG89	45	117389	1	1	1	1	0.04	Probable ATP-dependent RNA helicase DDX46 OS=Homo sapiens GN=DDX46 PE=1 SV=1
121	1	UniProt_human	A0A0A0MTG1	45	118287	1	1	1	1	0.04	Valine--tRNA ligase, mitochondrial OS=Homo sapiens GN=VARS2 PE=1 SV=1
126	1	UniProt_human	P05141	44	32831	2	2	2	2	0.29	ADP/ATP translocase 2 OS=Homo sapiens GN=SLC25A5 PE=1 SV=7
125	1	UniProt_human	F8VQX7	44	81606	1	1	1	1	0.05	Oxysterol-binding protein (Fragment) OS=Homo sapiens GN=OSBPL8 PE=1 SV=1
127	1	UniProt_human	Q4VCS5	44	118013	1	1	1	1	0.04	Angiomotin OS=Homo sapiens GN=AMOT PE=1 SV=1
126	2	UniProt_human	P12236	43	32845	2	2	2	2	0.29	ADP/ATP translocase 3 OS=Homo sapiens GN=SLC25A6 PE=1 SV=4
129	1	UniProt_human	G3V153	43	70310	1	1	1	1	0.06	Caprin-1 OS=Homo sapiens GN=CAPRIN1 PE=1 SV=1
128	1	UniProt_human	F5H6E2	43	118920	1	1	1	1	0.04	Unconventional myosin-Ic OS=Homo sapiens GN=MYO1C PE=1 SV=1
130	1	UniProt_human	Q9P0V3	42	107428	1	1	1	1	0.04	SH3 domain-binding protein 4 OS=Homo sapiens GN=SH3BP4 PE=1 SV=1
131	1	UniProt_human	A0A0R4J2E8	40	94565	1	1	1	1	0.05	Matrin-3 OS=Homo sapiens GN=MATR3 PE=1 SV=1
132	1	UniProt_human	P35573	39	174652	1	1	1	1	0.02	Glycogen debranching enzyme OS=Homo sapiens GN=AGL PE=1 SV=3
133	1	UniProt_human	J3KRD0	38	28420	1	1	1	1	0.16	Archaemetzincin-2 (Fragment) OS=Homo sapiens GN=AMZ2 PE=1 SV=1
134	1	UniProt_human	M0QZR4	38	108256	1	1	1	1	0.04	Rho guanine nucleotide exchange factor 1 OS=Homo sapiens GN=ARHGEF1 PE=1 SV=1
135	1	UniProt_human	A0A0U1RQX8	36	96825	1	1	1	1	0.04	E3 ubiquitin-protein ligase CBL OS=Homo sapiens GN=CBL PE=1 SV=1
136	1	UniProt_human	Q96C10	35	76564	1	1	1	1	0.06	Probable ATP-dependent RNA helicase DHX58 OS=Homo sapiens GN=DHX58 PE=1 SV=1
137	1	UniProt_human	A0A075B6T1	34	129519	1	1	1	1	0.03	Activating molecule in BECN1-regulated autophagy protein 1 OS=Homo sapiens GN=AMBRA1 PE=1 SV=1
Not what you expected? Try the select summary.
Mascot: http://www.matrixscience.com/
