# Supplementary material for: FER-mediated phosphorylation and PIK3R2 recruitment on IRS4 promotes AKT activation and tumorigenesis in ovarian cancer cells
Source: eLife. 2022 May 12;11:e76183. doi: 10.7554/eLife.76183 (PMC9098222; doi:10.7554/eLife.76183)
Supplement: Supplementary file 8. — Identification of tyrosine residue(s) that undergo phosphorylation in the presence of FER by mass spectrometry analysis in duplicate in Figure 3D. The details of raw data analysis and database search have been described in the section of Materials and methods. The analyzed MS data was provided in Supplementary files 8-9. First identification of tyrosine phosphorylation sites on IRS4 is shown in this file. [file elife-76183-supp8.xlsx]

## Sheet: Phospho (STY)Sites
	Groups	Samples
	IRS4	A-Control
	FER+IRS4	B-sample
Proteins	Positions within proteins	Leading proteins	Protein	Protein names	Gene names	Fasta headers	Localization prob	Score diff	PEP	Score	Delta score	Score for localization	Localization prob A-Control	Score diff A-Control	PEP A-Control	Score A-Control	Localization prob B-sample	Score diff B-sample	PEP B-sample	Score B-sample	Diagnostic peak	Number of Phospho (STY)	Amino acid	Sequence window	Modification window	Peptide window coverage	Phospho (STY) Probabilities	Phospho (STY) Score diffs	Position in peptide	Charge	Mass error [ppm]	Identification type A-Control	Identification type B-sample	Intensity	Intensity___1	Intensity___2	Intensity___3	Ratio mod/base	Intensity A-Control	Intensity B-sample	Ratio mod/base A-Control	Ratio mod/base B-sample	Intensity A-Control___1	Intensity A-Control___2	Intensity A-Control___3	Intensity B-sample___1	Intensity B-sample___2	Intensity B-sample___3	Occupancy A-Control
A0A0A0MT38;A0A088AWN3;A0A0A0MSY4;A0A0A0MRA7;Q9BZ29	1186;1186;1185;1186;1186	A0A0A0MT38	A0A0A0MT38	Dedicator of cytokinesis protein 9	DOCK9	tr|A0A0A0MT38|A0A0A0MT38_HUMAN Dedicator of cytokinesis 9, isoform CRA_b OS=Homo sapiens GN=DOCK9 PE=1 SV=2;tr|A0A088AWN3|A0A088AWN3_HUMAN Dedicator of cytokinesis protein 9 OS=Homo sapiens GN=DOCK9 PE=1 SV=1;tr|A0A0A0MSY4|A0A0A0MSY4_HUMAN Dedicator of cyt	1	43.3077	0.0117476	43.308	7.8629	43.308					1	43.3077	0.0117476	43.308		2	S	GLLIENVQRINVRDVSPFPVNAGMTVKDESL	X;X;X;X;X;X;X;X;X;X;X;X;X;X;X;Phospho (STY);X;X;X;X;X;X;X;X;Phospho (STY);X;X;X;X;X;X	XXXXXXXXXXXXXPPPPPPPPPPPPPPXXXX	DVS(1)PFPVNAGMT(1)VK	DVS(43.31)PFPVNAGMT(43.31)VK	3	2	-0.41599		By MS/MS	28728000	0	28728000	0	NaN	0	28728000	NaN	NaN	0	0	0	0	28728000	0	NaN
O14654	775	O14654	O14654	Insulin receptor substrate 4	IRS4	sp|O14654|IRS4_HUMAN Insulin receptor substrate 4 OS=Homo sapiens GN=IRS4 PE=1 SV=1	0.76358	5.35255	3.65377e-16	85.998	80.157	85.998	0.430643	0	3.08951e-08	60.18	0.76358	5.35255	3.65377e-16	85.998		1	S	KAPDTNKEDDSKDNDSESDYMFMAPGAGAIP	X;X;X;X;X;X;X;X;X;X;X;X;X;X;X;Phospho (STY);X;X;X;X;X;X;X;X;X;X;X;X;X;X;X	XPPPPPPPPPPPPPPPPPPPPPPPPPPPPPP	APDTNKEDDS(0.013)KDNDS(0.764)ES(0.223)DY(0.001)MFMAPGAGAIPK	APDT(-46.37)NKEDDS(-17.71)KDNDS(5.35)ES(-5.35)DY(-29.63)MFMAPGAGAIPK	15	3	-0.16833	By matching	By MS/MS	95367000	95367000	0	0	0.034941	992400	94375000	0.0011041	0.051556	992400	0	0	94375000	0	0	NaN
O14654	777	O14654	O14654	Insulin receptor substrate 4	IRS4	sp|O14654|IRS4_HUMAN Insulin receptor substrate 4 OS=Homo sapiens GN=IRS4 PE=1 SV=1	0.430643	0	3.08951e-08	60.18	54.693	60.18	0.430643	0	3.08951e-08	60.18	0	0		NaN			S	PDTNKEDDSKDNDSESDYMFMAPGAGAIPKN	X;X;X;X;X;X;X;X;X;X;X;X;X;X;X;X;X;X;X;X;X;X;X;X;X;X;X;X;X;X;X	XXXXXXXXXXXXXXXXXXXXXXXXXXXXXXX	APDT(0.013)NKEDDS(0.123)KDNDS(0.431)ES(0.431)DY(0.002)MFMAPGAGAIPK	APDT(-15.18)NKEDDS(-5.43)KDNDS(0)ES(0)DY(-22.5)MFMAPGAGAIPK	17	3	-0.46282			0	0	0	0	0	0	0	0	0	0	0	0	0	0	0	NaN
O14654	427	O14654	O14654	Insulin receptor substrate 4	IRS4	sp|O14654|IRS4_HUMAN Insulin receptor substrate 4 OS=Homo sapiens GN=IRS4 PE=1 SV=1	1	88.914	4.75299e-15	137.89	113	137.89	1	83.376	2.26691e-14	127.71	1	88.914	4.75299e-15	137.89		1	S	GRLHLPRGRRSRRAVSVPASFFRRLAPSPAR	X;X;X;X;X;X;X;X;X;X;X;X;X;X;X;Phospho (STY);X;X;X;X;X;X;X;X;X;X;X;Phospho (STY);X;X;X	XXXXXXXXXXXXPPPPPPPPPPPXXXXXXXX	AVS(1)VPASFFR	AVS(88.91)VPAS(-88.91)FFR	3	2	-0.0018735	By MS/MS	By MS/MS	305400000	305400000	0	0	0.81639	42514000	56881000	0.234	0.29564	42514000	0	0	56881000	0	0	NaN
O14654	1061	O14654	O14654	Insulin receptor substrate 4	IRS4	sp|O14654|IRS4_HUMAN Insulin receptor substrate 4 OS=Homo sapiens GN=IRS4 PE=1 SV=1	0.834644	8.05671	1.7618e-08	90.534	80.947	90.534					0.834644	8.05671	1.7618e-08	90.534		1	S	YVVDPFSECCMDISLSPSRCSEPPPVARLLQ	X;X;X;X;X;X;X;X;X;X;Oxidation (M);X;X;X;X;Phospho (STY);X;X;X;X;X;X;X;X;X;X;X;X;X;X;X	PPPPPPPPPPPPPPPPPPPXXXXXXXXXXXX	IYVVDPFSECCMDIS(0.035)LS(0.835)PS(0.131)R	IY(-89.3)VVDPFS(-57.51)ECCMDIS(-13.8)LS(8.06)PS(-8.06)R	17	3	-0.26324		By MS/MS	6400700	6400700	0	0	0.007634	0	6400700	0	0.049142	0	0	0	6400700	0	0	NaN
O14654	439	O14654	O14654	Insulin receptor substrate 4	IRS4	sp|O14654|IRS4_HUMAN Insulin receptor substrate 4 OS=Homo sapiens GN=IRS4 PE=1 SV=1	1	98.9017	1.92179e-09	121.9	68.775	98.902	1	85.5541	0.000737991	85.554	1	98.9017	1.92179e-09	121.9		1	S	RAVSVPASFFRRLAPSPARPRHPAEAPNNGA	X;X;X;Phospho (STY);X;X;X;X;X;X;X;X;X;X;X;Phospho (STY);X;X;X;X;X;X;X;X;X;X;X;X;X;X;X	XXXXXXXXXXXPPPPPPPPPPXXXXXXXXXX	RLAPS(1)PARPR	RLAPS(98.9)PARPR	5	3	-0.21405	By MS/MS	By MS/MS	766540000	766540000	0	0	5.3896	505980000	102710000	6.4776	1.602	505980000	0	0	102710000	0	0	0.20439
O14654	872	O14654	O14654	Insulin receptor substrate 4	IRS4	sp|O14654|IRS4_HUMAN Insulin receptor substrate 4 OS=Homo sapiens GN=IRS4 PE=1 SV=1	0.789986	7.31736	5.07582e-05	47.745	39.457	47.745	0.789986	7.31736	5.07582e-05	47.745						1	S	KPSGEGSFSKPGDGGSPSKPSDHEPPKNKAK	X;X;X;X;X;X;X;X;X;X;X;X;X;X;X;Phospho (STY);X;X;X;X;X;X;X;X;X;X;X;X;X;X;X	XPPPPPPPPPPPPPPPPPPPPPPPPPPXXXX	PS(0.003)GEGS(0.01)FS(0.042)KPGDGGS(0.79)PS(0.147)KPS(0.009)DHEPPK	PS(-24.3)GEGS(-19.08)FS(-12.73)KPGDGGS(7.32)PS(-7.32)KPS(-19.6)DHEPPK	15	4	0.18393	By MS/MS		31417000	31417000	0	0	0.11055	31417000	0	0.1951	0	31417000	0	0	0	0	0	NaN
O14654;H3BTC1	1231;12	O14654	O14654	Insulin receptor substrate 4	IRS4	sp|O14654|IRS4_HUMAN Insulin receptor substrate 4 OS=Homo sapiens GN=IRS4 PE=1 SV=1;tr|H3BTC1|H3BTC1_HUMAN Uncharacterized protein (Fragment) OS=Homo sapiens PE=4 SV=1	1	105.41	5.2274e-53	158.69	137.45	158.69	1	105.41	5.2274e-53	158.69	1	78.6015	7.41015e-27	120.67		1	S	PPRSRRVPRPPEREDSDNDDDTHVRMDFARR	X;X;X;X;X;X;X;X;X;X;X;X;X;X;X;Phospho (STY);X;X;X;X;X;X;X;X;X;X;X;X;X;X;X	XXXXXXPPPPPPPPPPPPPPPPPPPXXXXXX	VPRPPEREDS(1)DNDDDTHVR	VPRPPEREDS(105.41)DNDDDT(-105.41)HVR	10	4	-0.21242	By MS/MS	By MS/MS	736790000	736790000	0	0	10.499	259640000	349820000	4.8785	20.637	259640000	0	0	349820000	0	0	0.61597
O14654	751	O14654	O14654	Insulin receptor substrate 4	IRS4	sp|O14654|IRS4_HUMAN Insulin receptor substrate 4 OS=Homo sapiens GN=IRS4 PE=1 SV=1	1	83.605	1.06363e-08	113.61	91.581	113.61	1	83.605	1.06363e-08	113.61	1	78.7587	3.45119e-08	105.17		1	S	PFEDSRGYMMMFPRVSPPPAPSPPKAPDTNK	X;X;X;X;X;X;X;Phospho (STY);Oxidation (M);Oxidation (M);Oxidation (M);X;X;X;X;Phospho (STY);X;X;X;X;X;X;X;X;X;X;X;X;Phospho (STY);X;X	XXXXXXXXXXXXXXPPPPPPPPPPPXXXXXX	VS(1)PPPAPSPPK	VS(83.6)PPPAPS(-83.6)PPK	2	2	0.0076192	By MS/MS	By MS/MS	70973000	70973000	0	0	0.15467	35856000	35118000	0.09784	0.38004	35856000	0	0	35118000	0	0	0.60251
P78527;F5GX40	140;45	P78527	P78527	DNA-dependent protein kinase catalytic subunit	PRKDC	sp|P78527|PRKDC_HUMAN DNA-dependent protein kinase catalytic subunit OS=Homo sapiens GN=PRKDC PE=1 SV=3;tr|F5GX40|F5GX40_HUMAN DNA-dependent protein kinase catalytic subunit (Fragment) OS=Homo sapiens GN=PRKDC PE=1 SV=1	0.333333	0	0.000202608	91.906	42.548	67.032	0.333333	0	0.000202608	91.906	0.333333	0	0.000227657	91.041			S	IPALDLLIKLLQTFRSSRLMDEFKIGELFSK	X;X;X;X;X;X;X;X;X;X;X;X;X;X;X;X;X;X;X;X;X;X;X;X;X;X;X;X;X;X;X	XXXXXXXXXXXXXXXXXXXXXXXXXXXXXXX	LLQT(0.333)FRS(0.333)S(0.333)R	LLQT(0)FRS(0)S(0)R	7	2	-2.4159			0	0	0	0	NaN	0	0	NaN	NaN	0	0	0	0	0	0	NaN
P78527;F5GX40	141;46	P78527	P78527	DNA-dependent protein kinase catalytic subunit	PRKDC	sp|P78527|PRKDC_HUMAN DNA-dependent protein kinase catalytic subunit OS=Homo sapiens GN=PRKDC PE=1 SV=3;tr|F5GX40|F5GX40_HUMAN DNA-dependent protein kinase catalytic subunit (Fragment) OS=Homo sapiens GN=PRKDC PE=1 SV=1	0.333333	0	0.000202608	91.906	42.548	67.032	0.333333	0	0.000202608	91.906	0.333333	0	0.000227657	91.041			S	PALDLLIKLLQTFRSSRLMDEFKIGELFSKF	X;X;X;X;X;X;X;X;X;X;X;X;X;X;X;X;X;X;X;X;X;X;X;X;X;X;X;X;X;X;X	XXXXXXXXXXXXXXXXXXXXXXXXXXXXXXX	LLQT(0.333)FRS(0.333)S(0.333)R	LLQT(0)FRS(0)S(0)R	8	2	-2.4159			0	0	0	0	NaN	0	0	NaN	NaN	0	0	0	0	0	0	NaN
Q15031	108	Q15031	Q15031	Probable leucine--tRNA ligase, mitochondrial	LARS2	sp|Q15031|SYLM_HUMAN Probable leucine--tRNA ligase, mitochondrial OS=Homo sapiens GN=LARS2 PE=1 SV=2	0.496089	0	0.00234519	55.452	16.818	55.452	0.496089	0	0.00234519	55.452	0	0		NaN			S	PSGKLHMGHVRVYTISDTIARFQKMRGMQVI	X;X;X;X;X;X;X;X;X;X;X;X;X;X;X;Phospho (STY);X;X;X;X;X;X;X;X;X;X;X;X;X;X;X	XXXXXXXXXXXPPPPPPPPPPPPPXXXXXXX	VYT(0.008)IS(0.496)DT(0.496)IARFQK	VY(-48.41)T(-18.03)IS(0)DT(0)IARFQK	5	3	1.258			0	0	0	0	NaN	0	0	NaN	NaN	0	0	0	0	0	0	NaN
Q8ND56	216	Q8ND56	Q8ND56	Protein LSM14 homolog A	LSM14A	sp|Q8ND56|LS14A_HUMAN Protein LSM14 homolog A OS=Homo sapiens GN=LSM14A PE=1 SV=3	0.999476	35.8161	2.32556e-18	119.32	87.062	119.32	0	0		NaN	0.999476	35.8161	2.32556e-18	119.32		1	S	TASAHLPAPAAVGRRSPVSTRPLPSASQKAG	X;X;X;X;X;X;X;X;X;X;X;X;X;X;X;Phospho (STY);X;X;X;X;X;X;X;X;X;X;X;X;X;X;X	XXXXXXXXXXXXXXXPPPPPPPPPPPPPPXX	S(0.999)PVSTRPLPSASQK	S(35.82)PVS(-35.82)T(-35.82)RPLPS(-74.86)AS(-93.79)QK	1	2	-0.03098	By matching	By MS/MS	16704000	16704000	0	0	NaN	2871100	13833000	NaN	NaN	2871100	0	0	13833000	0	0	NaN
Q9NYF8;E9PK91;E9PK09;E9PQN2;E9PKI6;E9PJA7	268;268;268;266;268;266	Q9NYF8	Q9NYF8	Bcl-2-associated transcription factor 1	BCLAF1	sp|Q9NYF8|BCLF1_HUMAN Bcl-2-associated transcription factor 1 OS=Homo sapiens GN=BCLAF1 PE=1 SV=2;tr|E9PK91|E9PK91_HUMAN Bcl-2-associated transcription factor 1 OS=Homo sapiens GN=BCLAF1 PE=1 SV=1;tr|E9PK09|E9PK09_HUMAN Bcl-2-associated transcription facto	0.961944	14.1615	8.18537e-14	104.63	83.032	90.316	0.961944	14.1615	8.18537e-14	104.63	0	0		NaN		1	S	SAKNTPSQHSHSIQHSPERSGSGSVGNGSSR	X;X;X;X;X;X;X;X;X;X;X;X;X;X;X;Phospho (STY);X;X;X;X;X;X;X;X;X;X;X;X;X;X;X	XXXPPPPPPPPPPPPPPPPXXXXXXXXXXXX	NTPSQHS(0.001)HS(0.037)IQHS(0.962)PER	NT(-73.24)PS(-52.69)QHS(-29.21)HS(-14.16)IQHS(14.16)PER	13	3	-0.022445	By MS/MS	By matching	19809000	19809000	0	0	NaN	7768100	4361500	NaN	NaN	7768100	0	0	4361500	0	0	NaN
Q9NYF8;E9PK91;E9PK09;E9PQN2;E9PKI6	648;648;648;646;648	Q9NYF8	Q9NYF8	Bcl-2-associated transcription factor 1	BCLAF1	sp|Q9NYF8|BCLF1_HUMAN Bcl-2-associated transcription factor 1 OS=Homo sapiens GN=BCLAF1 PE=1 SV=2;tr|E9PK91|E9PK91_HUMAN Bcl-2-associated transcription factor 1 OS=Homo sapiens GN=BCLAF1 PE=1 SV=1;tr|E9PK09|E9PK09_HUMAN Bcl-2-associated transcription facto	1	81.9717	0.00334009	81.972	57.196	81.972	0	0		NaN	1	81.9717	0.00334009	81.972		1	S	TSYQKATEEHSTRQKSPEIHRRIDISPSTLR	X;X;X;X;X;X;X;X;X;X;X;X;X;X;X;Phospho (STY);X;X;X;X;X;X;X;X;X;X;X;X;X;X;X	XXXXXXXXXXXXXPPPPPPPPXXXXXXXXXX	QKS(1)PEIHR	QKS(81.97)PEIHR	3	2	0.22066	By matching	By MS/MS	12254000	12254000	0	0	NaN	728540	4084900	NaN	NaN	728540	0	0	4084900	0	0	NaN
Q9NYF8;E9PK91;E9PK09;E9PQN2;E9PKI6;E9PJA7;H0YF00	285;285;285;283;285;283;26	Q9NYF8	Q9NYF8	Bcl-2-associated transcription factor 1	BCLAF1	sp|Q9NYF8|BCLF1_HUMAN Bcl-2-associated transcription factor 1 OS=Homo sapiens GN=BCLAF1 PE=1 SV=2;tr|E9PK91|E9PK91_HUMAN Bcl-2-associated transcription factor 1 OS=Homo sapiens GN=BCLAF1 PE=1 SV=1;tr|E9PK09|E9PK09_HUMAN Bcl-2-associated transcription facto	0.530981	0.564241	0.00438019	40.801	36.171	40.801	0.530981	0.564241	0.00438019	40.801	0	0		NaN		1	S	ERSGSGSVGNGSSRYSPSQNSPIHHIPSRRS	X;X;X;X;X;X;X;X;X;X;X;X;X;X;X;Phospho (STY);X;X;X;X;X;X;X;X;X;X;X;X;X;X;X	XXXXXXXXXXXXXXPPPPPPPPPPPPPPPXX	Y(0.466)S(0.531)PS(0.002)QNS(0.001)PIHHIPSR	Y(-0.56)S(0.56)PS(-24.62)QNS(-27.96)PIHHIPS(-40.37)R	2	3	-0.39998	By MS/MS	By matching	5043500	5043500	0	0	NaN	1977300	3066200	NaN	NaN	1977300	0	0	3066200	0	0	NaN
Q9Y2W1	248	Q9Y2W1	Q9Y2W1	Thyroid hormone receptor-associated protein 3	THRAP3	sp|Q9Y2W1|TR150_HUMAN Thyroid hormone receptor-associated protein 3 OS=Homo sapiens GN=THRAP3 PE=1 SV=2	0.999928	41.3832	0.00138872	46.926	40.198	46.926					0.999928	41.3832	0.00138872	46.926		2	S	ASRASAVSELSPRERSPALKSPLQSVVVRRR	X;X;X;X;X;X;X;X;X;X;X;X;X;X;X;Phospho (STY);X;X;X;X;Phospho (STY);X;X;X;X;X;X;X;X;X;X	XXXXXXXXXXXXXPPPPPPPPPPPPPPPPXX	ERS(1)PALKS(0.988)PLQS(0.012)VVVR	ERS(41.38)PALKS(19.28)PLQS(-19.28)VVVR	3	3	0.87214		By MS/MS	10381000	0	10381000	0	NaN	0	10381000	NaN	NaN	0	0	0	0	10381000	0	NaN
Q9Y2W1	253	Q9Y2W1	Q9Y2W1	Thyroid hormone receptor-associated protein 3	THRAP3	sp|Q9Y2W1|TR150_HUMAN Thyroid hormone receptor-associated protein 3 OS=Homo sapiens GN=THRAP3 PE=1 SV=2	0.988341	19.2823	0.00138872	46.926	40.198	46.926					0.988341	19.2823	0.00138872	46.926		2	S	AVSELSPRERSPALKSPLQSVVVRRRSPRPS	X;X;X;X;X;X;X;X;X;X;Phospho (STY);X;X;X;X;Phospho (STY);X;X;X;X;X;X;X;X;X;X;X;X;X;X;X	XXXXXXXXPPPPPPPPPPPPPPPPXXXXXXX	ERS(1)PALKS(0.988)PLQS(0.012)VVVR	ERS(41.38)PALKS(19.28)PLQS(-19.28)VVVR	8	3	0.87214		By MS/MS	10381000	0	10381000	0	NaN	0	10381000	NaN	NaN	0	0	0	0	10381000	0	NaN
A0A0A0MT38;A0A088AWN3;A0A0A0MSY4;A0A0A0MRA7;Q9BZ29	1195;1195;1194;1195;1195	A0A0A0MT38	A0A0A0MT38	Dedicator of cytokinesis protein 9	DOCK9	tr|A0A0A0MT38|A0A0A0MT38_HUMAN Dedicator of cytokinesis 9, isoform CRA_b OS=Homo sapiens GN=DOCK9 PE=1 SV=2;tr|A0A088AWN3|A0A088AWN3_HUMAN Dedicator of cytokinesis protein 9 OS=Homo sapiens GN=DOCK9 PE=1 SV=1;tr|A0A0A0MSY4|A0A0A0MSY4_HUMAN Dedicator of cyt	1	43.3077	0.0117476	43.308	7.8629	43.308					1	43.3077	0.0117476	43.308		2	T	INVRDVSPFPVNAGMTVKDESLALPAVNPLV	X;X;X;X;X;X;Phospho (STY);X;X;X;X;X;X;X;X;Phospho (STY);X;X;X;X;X;X;X;X;X;X;X;X;X;X;X	XXXXPPPPPPPPPPPPPPXXXXXXXXXXXXX	DVS(1)PFPVNAGMT(1)VK	DVS(43.31)PFPVNAGMT(43.31)VK	12	2	-0.41599		By MS/MS	28728000	0	28728000	0	NaN	0	28728000	NaN	NaN	0	0	0	0	28728000	0	NaN
E9PSE9;F5GWJ3;Q9NVL8	280;321;281	E9PSE9	E9PSE9	Uncharacterized protein C14orf105	C14orf105	tr|E9PSE9|E9PSE9_HUMAN Uncharacterized protein C14orf105 OS=Homo sapiens GN=C14orf105 PE=4 SV=1;tr|F5GWJ3|F5GWJ3_HUMAN Uncharacterized protein C14orf105 OS=Homo sapiens GN=C14orf105 PE=4 SV=1;sp|Q9NVL8|CN105_HUMAN Uncharacterized protein C14orf105 OS=Homo	1	45.7179	0.00344189	45.718	23.57	45.718	1	45.7179	0.00344189	45.718						2	T	DEQGKDEKKPRALVRTRTERIPLFDEFFDQE	X;X;X;X;X;X;X;X;X;X;X;X;X;X;X;Phospho (STY);X;Phospho (STY);X;X;X;X;X;X;X;X;X;X;X;X;X	XXXXXXXXXXXPPPPPPPPPXXXXXXXXXXX	ALVRT(1)RT(1)ER	ALVRT(45.72)RT(45.72)ER	5	2	2.1242	By MS/MS		2436400	0	2436400	0	NaN	2436400	0	NaN	NaN	0	2436400	0	0	0	0	NaN
E9PSE9;F5GWJ3;Q9NVL8	282;323;283	E9PSE9	E9PSE9	Uncharacterized protein C14orf105	C14orf105	tr|E9PSE9|E9PSE9_HUMAN Uncharacterized protein C14orf105 OS=Homo sapiens GN=C14orf105 PE=4 SV=1;tr|F5GWJ3|F5GWJ3_HUMAN Uncharacterized protein C14orf105 OS=Homo sapiens GN=C14orf105 PE=4 SV=1;sp|Q9NVL8|CN105_HUMAN Uncharacterized protein C14orf105 OS=Homo	1	45.7179	0.00344189	45.718	23.57	45.718	1	45.7179	0.00344189	45.718						2	T	QGKDEKKPRALVRTRTERIPLFDEFFDQE__	X;X;X;X;X;X;X;X;X;X;X;X;X;Phospho (STY);X;Phospho (STY);X;X;X;X;X;X;X;X;X;X;X;X;X;X;X	XXXXXXXXXPPPPPPPPPXXXXXXXXXXXXX	ALVRT(1)RT(1)ER	ALVRT(45.72)RT(45.72)ER	7	2	2.1242	By MS/MS		2436400	0	2436400	0	NaN	2436400	0	NaN	NaN	0	2436400	0	0	0	0	NaN
O14654	764	O14654	O14654	Insulin receptor substrate 4	IRS4	sp|O14654|IRS4_HUMAN Insulin receptor substrate 4 OS=Homo sapiens GN=IRS4 PE=1 SV=1	0.322897	1.87784	8.30267e-06	43.612	37.451	43.612	0	0		NaN	0.322897	1.87784	8.30267e-06	43.612			T	RVSPPPAPSPPKAPDTNKEDDSKDNDSESDY	X;X;Phospho (STY);X;X;X;X;X;X;X;X;X;X;X;X;Phospho (STY);X;X;X;X;X;X;X;X;X;X;X;X;X;X;X	XXXXXXXXXXXXPPPPPPPPPPPPPPPPPPP	APDT(0.323)NKEDDS(0.21)KDNDS(0.21)ES(0.21)DY(0.048)MFMAPGAGAIPK	APDT(1.88)NKEDDS(-1.88)KDNDS(-1.88)ES(-1.88)DY(-8.24)MFMAPGAGAIPK	4	4	-0.27849			0	0	0	0	0	0	0	0	0	0	0	0	0	0	0	NaN
O14654	149	O14654	O14654	Insulin receptor substrate 4	IRS4	sp|O14654|IRS4_HUMAN Insulin receptor substrate 4 OS=Homo sapiens GN=IRS4 PE=1 SV=1	0.536313	0.633385	0.0148505	46.606	32.187	46.606					0.536313	0.633385	0.0148505	46.606		1	T	SGAAIPPLIPPRRVITLYQCFSVSQRADARY	X;X;X;X;X;X;X;X;X;X;X;X;X;X;X;Phospho (STY);X;X;X;X;X;X;X;X;X;X;X;X;X;X;X	XXXXXXXXXXXXXPPPPPPPPPPPPPXXXXX	VIT(0.536)LY(0.464)QCFSVSQR	VIT(0.63)LY(-0.63)QCFS(-36.37)VS(-42.45)QR	3	2	-0.0055999		By MS/MS	1562400	1562400	0	0	0.013562	0	1562400	0	0.044277	0	0	0	1562400	0	0	NaN
P78527;F5GX40	137;42	P78527	P78527	DNA-dependent protein kinase catalytic subunit	PRKDC	sp|P78527|PRKDC_HUMAN DNA-dependent protein kinase catalytic subunit OS=Homo sapiens GN=PRKDC PE=1 SV=3;tr|F5GX40|F5GX40_HUMAN DNA-dependent protein kinase catalytic subunit (Fragment) OS=Homo sapiens GN=PRKDC PE=1 SV=1	0.333333	0	0.000202608	91.906	42.548	67.032	0.333333	0	0.000202608	91.906	0.333333	0	0.000227657	91.041			T	KCKIPALDLLIKLLQTFRSSRLMDEFKIGEL	X;X;X;X;X;X;X;X;X;X;X;X;X;X;X;Phospho (STY);X;X;X;X;X;X;X;X;X;X;X;X;X;X;X	XXXXXXXXXXXXPPPPPPPPPXXXXXXXXXX	LLQT(0.333)FRS(0.333)S(0.333)R	LLQT(0)FRS(0)S(0)R	4	2	-2.4159			0	0	0	0	NaN	0	0	NaN	NaN	0	0	0	0	0	0	NaN
Q15031	110	Q15031	Q15031	Probable leucine--tRNA ligase, mitochondrial	LARS2	sp|Q15031|SYLM_HUMAN Probable leucine--tRNA ligase, mitochondrial OS=Homo sapiens GN=LARS2 PE=1 SV=2	0.496089	0	0.00234519	55.452	16.818	55.452	0.496089	0	0.00234519	55.452	0	0		NaN			T	GKLHMGHVRVYTISDTIARFQKMRGMQVINP	X;X;X;X;X;X;X;X;X;X;X;X;X;X;X;X;X;X;X;X;X;X;X;X;X;X;X;X;X;X;X	XXXXXXXXXXXXXXXXXXXXXXXXXXXXXXX	VYT(0.008)IS(0.496)DT(0.496)IARFQK	VY(-48.41)T(-18.03)IS(0)DT(0)IARFQK	7	3	1.258			0	0	0	0	NaN	0	0	NaN	NaN	0	0	0	0	0	0	NaN
O14654	336	O14654	O14654	Insulin receptor substrate 4	IRS4	sp|O14654|IRS4_HUMAN Insulin receptor substrate 4 OS=Homo sapiens GN=IRS4 PE=1 SV=1	1	44.447	0.0278047	44.447	13.729	44.447					1	44.447	0.0278047	44.447		1	Y	HELFLEKMRALCADEYRARCRSYSISIGAHL	X;X;X;X;X;X;X;X;X;X;X;X;X;X;X;Phospho (STY);X;X;X;X;X;X;X;X;X;X;X;X;X;X;X	XXXXXXXXXPPPPPPPPXXXXXXXXXXXXXX	ALCADEY(1)R	ALCADEY(44.45)R	7	2	0.018946		By MS/MS	1134800	1134800	0	0	0.0013543	0	1134800	0	0.0013674	0	0	0	1134800	0	0	NaN
O14654	291	O14654	O14654	Insulin receptor substrate 4	IRS4	sp|O14654|IRS4_HUMAN Insulin receptor substrate 4 OS=Homo sapiens GN=IRS4 PE=1 SV=1	0.937638	11.7712	0.000648583	58.071	46.095	58.071					0.937638	11.7712	0.000648583	58.071	+	1	Y	VVQLLSIRRCGHSEQYFFLEVGRSTVIGPGE	X;X;X;X;X;X;X;X;X;X;X;X;X;X;X;Phospho (STY);X;X;X;X;X;X;X;X;X;X;X;X;X;X;X	XXXXXXXXXPPPPPPPPPPPPPPXXXXXXXX	CGHS(0.062)EQY(0.938)FFLEVGR	CGHS(-11.77)EQY(11.77)FFLEVGR	7	3	0.029189		By MS/MS	1883200	1883200	0	0	0.0072647	0	1883200	0	0.062084	0	0	0	1883200	0	0	NaN
O14654	921	O14654	O14654	Insulin receptor substrate 4	IRS4	sp|O14654|IRS4_HUMAN Insulin receptor substrate 4 OS=Homo sapiens GN=IRS4 PE=1 SV=1	0.998564	28.7066	1.34917e-94	199.96	175.17	199.96	0.865674	9.04243	0.00893897	46.408	0.998564	28.7066	1.34917e-94	199.96		1	Y	QKPTHEQREADSSSDYVNMDFTKRESNTPAP	X;X;X;X;X;X;X;X;X;X;X;X;X;X;X;Phospho (STY);X;X;X;X;X;X;X;X;X;X;X;X;X;X;X	XXXXXXXXPPPPPPPPPPPPPPPPXXXXXXX	EADSSS(0.001)DY(0.999)VNMDFTKR	EADS(-48.89)S(-41.07)S(-28.71)DY(28.71)VNMDFT(-97.56)KR	8	2	0.0050289	By MS/MS	By MS/MS	175890000	175890000	0	0	0.13008	3457800	105160000	0.0066922	0.12587	3457800	0	0	105160000	0	0	NaN
O14654	847	O14654	O14654	Insulin receptor substrate 4	IRS4	sp|O14654|IRS4_HUMAN Insulin receptor substrate 4 OS=Homo sapiens GN=IRS4 PE=1 SV=1	0.843296	7.30899	0.0149079	49.418	24.495	49.418					0.843296	7.30899	0.0149079	49.418		1	Y	LPGKFLGRGLDKEVSYNWDPKDAASKPSGEG	X;X;X;X;X;X;X;X;X;X;X;X;X;X;X;Phospho (STY);X;X;X;X;X;X;X;X;X;X;X;X;X;X;X	XXXXXXXXXXXXPPPPPPPPPXXXXXXXXXX	EVS(0.157)Y(0.843)NWDPK	EVS(-7.31)Y(7.31)NWDPK	4	2	-0.18396		By MS/MS	2339500	2339500	0	0	0.0025673	0	2339500	0	0.0047474	0	0	0	2339500	0	0	NaN
O14654	743	O14654	O14654	Insulin receptor substrate 4	IRS4	sp|O14654|IRS4_HUMAN Insulin receptor substrate 4 OS=Homo sapiens GN=IRS4 PE=1 SV=1	1	75.3106	0.00594591	75.311	67.639	75.311	1	60.9612	0.014398	60.961	1	75.3106	0.00594591	75.311	+	1	Y	SKKRHSRSPFEDSRGYMMMFPRVSPPPAPSP	X;X;X;X;X;X;X;X;X;X;X;X;X;X;X;Phospho (STY);X;X;X;X;X;X;X;Phospho (STY);X;X;X;X;X;X;X	XXXXXXXXXXXXXXPPPPPPPPXXXXXXXXX	GY(1)MMMFPR	GY(75.31)MMMFPR	2	2	-0.77854	By MS/MS	By MS/MS	2370800	2370800	0	0	0.0028506	384390	1986400	0.0007616	0.0060752	384390	0	0	1986400	0	0	0.0094003
O14654	111	O14654	O14654	Insulin receptor substrate 4	IRS4	sp|O14654|IRS4_HUMAN Insulin receptor substrate 4 OS=Homo sapiens GN=IRS4 PE=1 SV=1	0.971102	15.264	1.19791e-05	77.923	51.32	77.923					0.971102	15.264	1.19791e-05	77.923	+	1	Y	FVLKLETADAPARLEYYENARKFRHSVRAAA	X;X;X;X;X;X;X;X;X;X;X;X;X;X;X;Phospho (STY);X;X;X;X;X;X;X;X;X;X;X;X;X;X;X	XXXXPPPPPPPPPPPPPPPPPXXXXXXXXXX	LEY(0.971)Y(0.029)ENAR	LEY(15.26)Y(-15.26)ENAR	3	2	-0.25095		By MS/MS	12312000	12312000	0	0	0.0078117	0	8108100	0	0.0097742	0	0	0	8108100	0	0	NaN
O14654	112	O14654	O14654	Insulin receptor substrate 4	IRS4	sp|O14654|IRS4_HUMAN Insulin receptor substrate 4 OS=Homo sapiens GN=IRS4 PE=1 SV=1	0.999742	35.8907	2.9066e-08	126.67	85.165	126.67					0.999742	35.8907	2.9066e-08	126.67	+	1	Y	VLKLETADAPARLEYYENARKFRHSVRAAAA	X;X;X;X;X;X;X;X;X;X;X;X;X;X;X;Phospho (STY);X;X;X;X;X;X;X;X;X;X;X;X;X;X;X	XXXXXXXXXXXXPPPPPPPPPXXXXXXXXXX	LEYY(1)ENAR	LEY(-35.89)Y(35.89)ENAR	4	2	0.038194		By MS/MS	32329000	32329000	0	0	0.020512	0	8108100	0	0.0097742	0	0	0	8108100	0	0	NaN
O14654	656	O14654	O14654	Insulin receptor substrate 4	IRS4	sp|O14654|IRS4_HUMAN Insulin receptor substrate 4 OS=Homo sapiens GN=IRS4 PE=1 SV=1	1	105.116	0.000468961	105.12	79.38	105.12					1	105.116	0.000468961	105.12	+	1	Y	GGTGGKGKSGGRFRLYFCVDRGATKECKEAK	X;X;X;X;X;X;X;X;X;X;X;X;X;X;X;Phospho (STY);X;X;X;X;X;X;X;X;X;X;X;X;X;X;X	XXXXXXXXXXXXXXPPPPPPPXXXXXXXXXX	LY(1)FCVDR	LY(105.12)FCVDR	2	2	-0.04902		By MS/MS	20496000	20496000	0	0	0.012319	0	20496000	0	0.027649	0	0	0	20496000	0	0	NaN
O14654	828	O14654	O14654	Insulin receptor substrate 4	IRS4	sp|O14654|IRS4_HUMAN Insulin receptor substrate 4 OS=Homo sapiens GN=IRS4 PE=1 SV=1	0.997081	25.3347	5.56265e-53	164.81	141.8	164.81	0	0		NaN	0.997081	25.3347	5.56265e-53	164.81		1	Y	NPFRSSPLGQNDNSEYVPMLPGKFLGRGLDK	X;X;X;X;X;X;X;X;X;X;X;X;X;X;X;Phospho (STY);X;X;X;X;X;X;X;X;X;X;X;X;X;X;X	XXXXPPPPPPPPPPPPPPPPPPPXXXXXXXX	SSPLGQNDNS(0.003)EY(0.997)VPMLPGK	S(-100.26)S(-100.26)PLGQNDNS(-25.33)EY(25.33)VPMLPGK	12	2	-0.064936	By matching	By MS/MS	110690000	110690000	0	0	0.040526	1415300	109270000	0.00072129	0.1421	1415300	0	0	109270000	0	0	0.0038851
[truncated: 27 more columns]
