# Supplementary material for: FER-mediated phosphorylation and PIK3R2 recruitment on IRS4 promotes AKT activation and tumorigenesis in ovarian cancer cells
Source: eLife. 2022 May 12;11:e76183. doi: 10.7554/eLife.76183 (PMC9098222; doi:10.7554/eLife.76183)
Supplement: Supplementary file 9. — Second identification of tyrosine phosphorylation sites on IRS4 is shown in this file. [file elife-76183-supp9.xlsx]

## Sheet: Phospho (STY)Sites
	Groups	Samples
	IRS4	A-control
	FER+IRS4	B-sample
Proteins	Positions within proteins	Leading proteins	Protein	Protein names	Gene names	Fasta headers	Localization prob	Score diff	PEP	Score	Delta score	Score for localization	Localization prob A-control	Score diff A-control	PEP A-control	Score A-control	Localization prob B-sample	Score diff B-sample	PEP B-sample	Score B-sample	Diagnostic peak	Number of Phospho (STY)	Amino acid	Sequence window	Modification window	Peptide window coverage	Phospho (STY) Probabilities	Phospho (STY) Score diffs	Position in peptide	Charge	Mass error [ppm]	Identification type A-control	Identification type B-sample	Intensity	Intensity___1	Intensity___2	Intensity___3	Ratio mod/base	Intensity A-control	Intensity B-sample	Ratio mod/base A-control	Ratio mod/base B-sample	Intensity A-control___1	Intensity A-control___2	Intensity A-control___3	Intensity B-sample___1	Intensity B-sample___2	Intensity B-sample___3	Occupancy A-control
A0A0A0MSF9	21	A0A0A0MSF9	A0A0A0MSF9		GPATCH11	tr|A0A0A0MSF9|A0A0A0MSF9_HUMAN G patch domain-containing protein 11 OS=Homo sapiens GN=GPATCH11 PE=1 SV=1	0.420308	1.614	0.000618943	64.654	42.608	58.246	0.420308	1.614	0.00138232	58.246	0.418293	1.57806	0.000618943	64.654			S	STALNRGEQRAVRYYSHMKLNMAEEEDYMSD	X;X;X;X;X;X;X;X;X;X;X;X;X;X;X;Phospho (STY);X;Oxidation (M);X;X;X;X;X;X;X;X;X;X;X;X;X	XXXXXXPPPPPPPPPPPPPXXXXXXXXXXXX	GEQRAVRY(0.29)Y(0.29)S(0.42)HMK	GEQRAVRY(-1.61)Y(-1.61)S(1.61)HMK	10	2	0.79694			0	0	0	0	NaN	0	0	NaN	NaN	0	0	0	0	0	0	NaN
A0A0J9YWI3	54	A0A0J9YWI3	A0A0J9YWI3			tr|A0A0J9YWI3|A0A0J9YWI3_HUMAN FERM domain-containing protein 4A (Fragment) OS=Homo sapiens GN=FRMD4A PE=1 SV=1	0.499939	0	0.00363051	42.809	33.805	42.809					0.499939	0	0.00363051	42.809		2	S	KTSKLANMGSKGKIISGSSGSLLSSGSGARR	X;X;X;X;X;X;X;X;X;X;X;X;X;X;X;Phospho (STY);X;Phospho (STY);X;X;X;X;X;X;X;X;X;X;X;X;X	XXXXXXXXXXXXXPPPPPPPPPPPPPPPPPP	IIS(0.5)GS(0.5)S(0.5)GS(0.5)LLSSGSGARR	IIS(0)GS(0)S(0)GS(0)LLS(-37.63)S(-42.36)GS(-42.4)GARR	3	2	0.030398		By MS/MS	68000000	0	68000000	0	NaN	0	68000000	NaN	NaN	0	0	0	0	68000000	0	NaN
A0A0J9YWI3	56	A0A0J9YWI3	A0A0J9YWI3			tr|A0A0J9YWI3|A0A0J9YWI3_HUMAN FERM domain-containing protein 4A (Fragment) OS=Homo sapiens GN=FRMD4A PE=1 SV=1	0.499939	0	0.00363051	42.809	33.805	42.809					0.499939	0	0.00363051	42.809		2	S	SKLANMGSKGKIISGSSGSLLSSGSGARRHC	X;X;X;X;X;X;X;X;X;X;X;X;X;Phospho (STY);X;Phospho (STY);X;X;X;X;X;X;X;X;X;X;X;X;X;X;X	XXXXXXXXXXXPPPPPPPPPPPPPPPPPPXX	IIS(0.5)GS(0.5)S(0.5)GS(0.5)LLSSGSGARR	IIS(0)GS(0)S(0)GS(0)LLS(-37.63)S(-42.36)GS(-42.4)GARR	5	2	0.030398		By MS/MS	68000000	0	68000000	0	NaN	0	68000000	NaN	NaN	0	0	0	0	68000000	0	NaN
A0A0J9YWI3	57	A0A0J9YWI3	A0A0J9YWI3			tr|A0A0J9YWI3|A0A0J9YWI3_HUMAN FERM domain-containing protein 4A (Fragment) OS=Homo sapiens GN=FRMD4A PE=1 SV=1	0.499939	0	0.00363051	42.809	33.805	42.809					0.499939	0	0.00363051	42.809		2	S	KLANMGSKGKIISGSSGSLLSSGSGARRHCI	X;X;X;X;X;X;X;X;X;X;X;X;X;X;X;X;X;X;X;X;X;X;X;X;X;X;X;X;X;X;X	XXXXXXXXXXXXXXXXXXXXXXXXXXXXXXX	IIS(0.5)GS(0.5)S(0.5)GS(0.5)LLSSGSGARR	IIS(0)GS(0)S(0)GS(0)LLS(-37.63)S(-42.36)GS(-42.4)GARR	6	2	0.030398		By MS/MS	68000000	0	68000000	0	NaN	0	68000000	NaN	NaN	0	0	0	0	68000000	0	NaN
A0A0J9YWI3	59	A0A0J9YWI3	A0A0J9YWI3			tr|A0A0J9YWI3|A0A0J9YWI3_HUMAN FERM domain-containing protein 4A (Fragment) OS=Homo sapiens GN=FRMD4A PE=1 SV=1	0.499939	0	0.00363051	42.809	33.805	42.809					0.499939	0	0.00363051	42.809		2	S	ANMGSKGKIISGSSGSLLSSGSGARRHCILL	X;X;X;X;X;X;X;X;X;X;X;X;X;X;X;X;X;X;X;X;X;X;X;X;X;X;X;X;X;X;X	XXXXXXXXXXXXXXXXXXXXXXXXXXXXXXX	IIS(0.5)GS(0.5)S(0.5)GS(0.5)LLSSGSGARR	IIS(0)GS(0)S(0)GS(0)LLS(-37.63)S(-42.36)GS(-42.4)GARR	8	2	0.030398		By MS/MS	68000000	0	68000000	0	NaN	0	68000000	NaN	NaN	0	0	0	0	68000000	0	NaN
C9JDZ2;Q9NVQ4	27;27	C9JDZ2	C9JDZ2	Fas apoptotic inhibitory molecule 1	FAIM	tr|C9JDZ2|C9JDZ2_HUMAN Fas apoptotic inhibitory molecule 1 (Fragment) OS=Homo sapiens GN=FAIM PE=1 SV=1;sp|Q9NVQ4|FAIM1_HUMAN Fas apoptotic inhibitory molecule 1 OS=Homo sapiens GN=FAIM PE=1 SV=1	0.333333	0	0.0143239	43.083	30.556	43.083	0.333333	0	0.0143239	43.083							S	LSDGVHKIEFEHGTTSGKRVVYVDGKEEIRK	X;X;X;X;X;X;X;X;X;X;X;X;X;X;X;X;X;X;X;X;X;X;X;X;X;X;X;X;X;X;X	XXXXXXXXXXXXXXXXXXXXXXXXXXXXXXX	IEFEHGT(0.333)T(0.333)S(0.333)GK	IEFEHGT(0)T(0)S(0)GK	9	2	-0.55583			0	0	0	0	NaN	0	0	NaN	NaN	0	0	0	0	0	0	NaN
D6RCC7;Q9P2D6	1002;1422	D6RCC7	D6RCC7	Protein FAM135A	FAM135A	tr|D6RCC7|D6RCC7_HUMAN Protein FAM135A OS=Homo sapiens GN=FAM135A PE=1 SV=1;sp|Q9P2D6|F135A_HUMAN Protein FAM135A OS=Homo sapiens GN=FAM135A PE=1 SV=2	1	47.5743	0.011228	47.574	24.834	47.574	1	47.5743	0.011228	47.574	0	0		NaN		1	S	NKAGLHYFKNVVLVGSLQDRYVPYHSARIEM	X;X;X;X;X;X;X;X;X;X;X;X;X;X;X;Phospho (STY);X;X;X;X;X;X;X;X;X;X;X;X;X;X;X	XXXXXXXXXPPPPPPPPPPPXXXXXXXXXXX	NVVLVGS(1)LQDR	NVVLVGS(47.57)LQDR	7	2	0.10676	By MS/MS	By matching	17940000	17940000	0	0	NaN	8002000	9938100	NaN	NaN	8002000	0	0	9938100	0	0	NaN
E7EQL8;Q96RT7	74;74	E7EQL8	E7EQL8	Gamma-tubulin complex component 6	TUBGCP6	tr|E7EQL8|E7EQL8_HUMAN Gamma-tubulin complex component 6 OS=Homo sapiens GN=TUBGCP6 PE=1 SV=1;sp|Q96RT7|GCP6_HUMAN Gamma-tubulin complex component 6 OS=Homo sapiens GN=TUBGCP6 PE=1 SV=3	1	49.3585	0.00553916	70.268	37.427	49.358	1	49.3585	0.0109166	57.559	1	49.3585	0.00553916	70.268		1	S	PDMSKLPARNKILMLSFDLRVGGLGPKADRL	X;X;X;X;X;X;X;X;X;X;X;X;X;X;X;Phospho (STY);X;X;X;X;X;X;X;X;X;X;X;X;X;X;X	XXXXXXXXXXXPPPPPPPPPXXXXXXXXXXX	ILMLS(1)FDLR	ILMLS(49.36)FDLR	5	2	1.4181	By MS/MS	By MS/MS	273460000	273460000	0	0	NaN	85921000	50206000	NaN	NaN	85921000	0	0	50206000	0	0	NaN
E9PK91;Q9NYF8;E9PK09;E9PQN2;E9PKI6	658;658;657;656;658	E9PK91	E9PK91	Bcl-2-associated transcription factor 1	BCLAF1	tr|E9PK91|E9PK91_HUMAN Bcl-2-associated transcription factor 1 OS=Homo sapiens GN=BCLAF1 PE=1 SV=1;sp|Q9NYF8|BCLF1_HUMAN Bcl-2-associated transcription factor 1 OS=Homo sapiens GN=BCLAF1 PE=1 SV=2;tr|E9PK09|E9PK09_HUMAN Bcl-2-associated transcription facto	0.7717	8.29973	0.00655355	67.726	33.765	67.726	0.7717	8.29973	0.00655355	67.726	0.751252	7.81056	0.0149199	49.35		1	S	STRQKSPEIHRRIDISPSTLRKHTRLAGEER	X;X;X;X;X;X;X;X;X;X;X;X;X;X;X;Phospho (STY);X;X;X;X;X;X;X;X;X;X;X;X;X;X;X	XXXXXXXXXXXXPPPPPPPPPXXXXXXXXXX	IDIS(0.772)PS(0.114)T(0.114)LR	IDIS(8.3)PS(-8.3)T(-8.3)LR	4	2	0.17548	By MS/MS	By MS/MS	3131300	3131300	0	0	NaN	1004200	1984500	NaN	NaN	1004200	0	0	1984500	0	0	NaN
E9PK91;Q9NYF8;E9PK09;E9PQN2;E9PKI6;E9PJA7	177;177;177;175;177;175	E9PK91	E9PK91	Bcl-2-associated transcription factor 1	BCLAF1	tr|E9PK91|E9PK91_HUMAN Bcl-2-associated transcription factor 1 OS=Homo sapiens GN=BCLAF1 PE=1 SV=1;sp|Q9NYF8|BCLF1_HUMAN Bcl-2-associated transcription factor 1 OS=Homo sapiens GN=BCLAF1 PE=1 SV=2;tr|E9PK09|E9PK09_HUMAN Bcl-2-associated transcription facto	1	49.9289	0.00315143	49.929	29.548	49.929	0	0		NaN	1	49.9289	0.00315143	49.929		1	S	QEKQTKKAEGEPQEESPLKSKSQEEPKDTFE	X;X;X;X;X;X;X;X;X;X;X;X;X;X;X;Phospho (STY);X;X;X;X;X;X;X;X;X;X;X;X;X;X;X	XXXXXXPPPPPPPPPPPPPXXXXXXXXXXXX	KAEGEPQEES(1)PLK	KAEGEPQEES(49.93)PLK	10	2	-0.39507	By matching	By MS/MS	9865300	9865300	0	0	NaN	1606400	8259000	NaN	NaN	1606400	0	0	8259000	0	0	NaN
E9PK91;Q9NYF8;E9PK09;E9PQN2;E9PKI6;E9PJA7;H0YF00	285;285;285;283;285;283;26	E9PK91	E9PK91	Bcl-2-associated transcription factor 1	BCLAF1	tr|E9PK91|E9PK91_HUMAN Bcl-2-associated transcription factor 1 OS=Homo sapiens GN=BCLAF1 PE=1 SV=1;sp|Q9NYF8|BCLF1_HUMAN Bcl-2-associated transcription factor 1 OS=Homo sapiens GN=BCLAF1 PE=1 SV=2;tr|E9PK09|E9PK09_HUMAN Bcl-2-associated transcription facto	0.557677	1.03368	0.00278679	62.765	58.45	62.765					0.557677	1.03368	0.00278679	62.765		1	S	ERSGSGSVGNGSSRYSPSQNSPIHHIPSRRS	X;X;X;X;X;X;X;X;X;X;X;X;X;X;X;Phospho (STY);X;X;X;X;X;X;X;X;X;X;X;X;X;X;X	XXXXXXXXXXXXXXPPPPPPPPPPPPPPPXX	Y(0.44)S(0.558)PS(0.002)QNS(0.001)PIHHIPSR	Y(-1.03)S(1.03)PS(-25.21)QNS(-27.11)PIHHIPS(-62.68)R	2	3	-0.59194		By MS/MS	4769800	4769800	0	0	NaN	0	4769800	NaN	NaN	0	0	0	4769800	0	0	NaN
H0YA15;H0Y8J3;Q16585	20;27;31	H0YA15	H0YA15	Beta-sarcoglycan	SGCB	tr|H0YA15|H0YA15_HUMAN Beta-sarcoglycan (Fragment) OS=Homo sapiens GN=SGCB PE=1 SV=1;tr|H0Y8J3|H0Y8J3_HUMAN Beta-sarcoglycan (Fragment) OS=Homo sapiens GN=SGCB PE=1 SV=1;sp|Q16585|SGCB_HUMAN Beta-sarcoglycan OS=Homo sapiens GN=SGCB PE=1 SV=1	1	43.1235	0.0150168	43.124	19.168	43.124	1	43.1235	0.0150168	43.124	1	43.1235	0.0150168	43.124		1	S	GPVKKSMREKAVERRSVNKEHNSNFKAGYIP	X;X;X;X;X;X;X;X;X;X;X;X;X;X;X;Phospho (STY);X;X;X;X;X;X;X;X;X;X;X;X;X;X;X	XXXXXXXXXXPPPPPPPPPXXXXXXXXXXXX	AVERRS(1)VNK	AVERRS(43.12)VNK	6	2	0.82333	By MS/MS	By MS/MS	31326000	31326000	0	0	NaN	19060000	12266000	NaN	NaN	19060000	0	0	12266000	0	0	NaN
H3BN14;P22676	174;174	H3BN14	H3BN14	Calretinin	CALB2	tr|H3BN14|H3BN14_HUMAN Calretinin (Fragment) OS=Homo sapiens GN=CALB2 PE=1 SV=2;sp|P22676|CALB2_HUMAN Calretinin OS=Homo sapiens GN=CALB2 PE=2 SV=2	0.5	0	0.00486401	41.401	41.401	41.401					0.5	0	0.00486401	41.401		1	S	ILRMFDLNGDGKLGLSEMSRLLPVQENFLLK	X;X;X;X;X;X;X;X;X;X;X;X;X;X;X;Phospho (STY);X;Oxidation (M);X;X;X;X;X;X;X;X;X;X;X;X;X	XXXXXXXXXXXXPPPPPPPPPPPPPPPPPPP	LGLS(0.5)EMS(0.5)RLLPVQENFLLK	LGLS(0)EMS(0)RLLPVQENFLLK	4	2	0.2395		By MS/MS	3645900000	3645900000	0	0	NaN	0	3645900000	NaN	NaN	0	0	0	3645900000	0	0	NaN
H3BN14;P22676	177;177	H3BN14	H3BN14	Calretinin	CALB2	tr|H3BN14|H3BN14_HUMAN Calretinin (Fragment) OS=Homo sapiens GN=CALB2 PE=1 SV=2;sp|P22676|CALB2_HUMAN Calretinin OS=Homo sapiens GN=CALB2 PE=2 SV=2	0.5	0	0.00486401	41.401	41.401	41.401					0.5	0	0.00486401	41.401		1	S	MFDLNGDGKLGLSEMSRLLPVQENFLLKFQG	X;X;X;X;X;X;X;X;X;X;X;X;X;X;X;X;X;X;X;X;X;X;X;X;X;X;X;X;X;X;X	XXXXXXXXXXXXXXXXXXXXXXXXXXXXXXX	LGLS(0.5)EMS(0.5)RLLPVQENFLLK	LGLS(0)EMS(0)RLLPVQENFLLK	7	2	0.2395		By MS/MS	3645900000	3645900000	0	0	NaN	0	3645900000	NaN	NaN	0	0	0	3645900000	0	0	NaN
O14654	1107	O14654	O14654	Insulin receptor substrate 4	IRS4	sp|O14654|IRS4_HUMAN Insulin receptor substrate 4 OS=Homo sapiens GN=IRS4 PE=1 SV=1	0.847983	7.46494	6.99879e-10	109	80.233	109	0.847983	7.46494	6.99879e-10	109	0.499952	0	0.00360989	59.227		1	S	FFAAARAAVSAFPTDSLERDLSPSSAPAVAS	X;X;X;X;X;X;X;X;X;X;X;X;X;X;X;Phospho (STY);X;X;X;X;X;X;X;X;X;X;X;X;X;X;X	XXXXXXPPPPPPPPPPPPPXXXXXXXXXXXX	AAVSAFPT(0.152)DS(0.848)LER	AAVS(-81.14)AFPT(-7.46)DS(7.46)LER	10	2	-0.12142	By MS/MS	By MS/MS	16301000	16301000	0	0	0.0057266	8769400	7531600	0.0055988	0.005883	8769400	0	0	7531600	0	0	NaN
O14654	427	O14654	O14654	Insulin receptor substrate 4	IRS4	sp|O14654|IRS4_HUMAN Insulin receptor substrate 4 OS=Homo sapiens GN=IRS4 PE=1 SV=1	1	83.376	1.21289e-10	125.74	102.37	124.1	1	83.376	2.26264e-10	124.1	1	76.7594	1.21289e-10	125.74		1	S	GRLHLPRGRRSRRAVSVPASFFRRLAPSPAR	X;X;X;X;X;X;X;X;X;X;X;X;X;X;X;Phospho (STY);X;X;X;X;X;X;X;X;X;X;X;Phospho (STY);X;X;X	XXXXXXXXXXXXXPPPPPPPPPPXXXXXXXX	AVS(1)VPASFFR	AVS(83.38)VPAS(-83.38)FFR	3	2	-0.10412	By MS/MS	By MS/MS	120870000	120870000	0	0	0.56169	55197000	65669000	0.59622	0.53562	55197000	0	0	65669000	0	0	NaN
O14654;H3BTC1	1231;12	O14654	O14654	Insulin receptor substrate 4	IRS4	sp|O14654|IRS4_HUMAN Insulin receptor substrate 4 OS=Homo sapiens GN=IRS4 PE=1 SV=1;tr|H3BTC1|H3BTC1_HUMAN Uncharacterized protein (Fragment) OS=Homo sapiens PE=4 SV=1	1	92.2225	2.70941e-22	114.88	98.753	114.88	0	0		NaN	1	92.2225	2.70941e-22	114.88		1	S	PPRSRRVPRPPEREDSDNDDDTHVRMDFARR	X;X;X;X;X;X;X;X;X;X;X;X;X;X;X;Phospho (STY);X;X;X;X;X;X;X;X;X;X;X;X;X;X;X	XXXXXXPPPPPPPPPPPPPPPPPPPXXXXXX	VPRPPEREDS(1)DNDDDTHVR	VPRPPEREDS(92.22)DNDDDT(-92.22)HVR	10	4	0.37301	By matching	By MS/MS	45621000	45621000	0	0	0.20234	4465700	9477100	0.030348	0.12101	4465700	0	0	9477100	0	0	0.03239
O14654	439	O14654	O14654	Insulin receptor substrate 4	IRS4	sp|O14654|IRS4_HUMAN Insulin receptor substrate 4 OS=Homo sapiens GN=IRS4 PE=1 SV=1	1	51.4453	0.00398217	93.267	52.242	51.445	1	51.4453	0.00706163	73.499	1	91.5493	0.00398217	93.267		1	S	RAVSVPASFFRRLAPSPARPRHPAEAPNNGA	X;X;X;Phospho (STY);X;X;X;X;X;X;X;X;X;X;X;Phospho (STY);X;X;X;X;X;X;X;X;X;X;X;X;X;X;X	XXXXXXXXXXXPPPPPPPPPPXXXXXXXXXX	RLAPS(1)PAR	RLAPS(51.45)PAR	5	2	0.11221	By MS/MS	By MS/MS	509470000	509470000	0	0	1.6127	5951400	6279100	0.03218	0.047946	5951400	0	0	6279100	0	0	NaN
O14654	872	O14654	O14654	Insulin receptor substrate 4	IRS4	sp|O14654|IRS4_HUMAN Insulin receptor substrate 4 OS=Homo sapiens GN=IRS4 PE=1 SV=1	0.997765	26.498	1.37342e-200	270.28	254.39	270.28	0.8889	9.0314	4.11478e-26	184.68	0.997765	26.498	1.37342e-200	270.28		1	S	KPSGEGSFSKPGDGGSPSKPSDHEPPKNKAK	X;X;X;X;X;X;X;X;X;X;X;X;X;X;X;Phospho (STY);X;X;X;X;X;X;X;X;X;X;X;X;X;X;X	XPPPPPPPPPPPPPPPPPPPPPPPPPPXXXX	PSGEGSFSKPGDGGS(0.998)PS(0.002)KPSDHEPPK	PS(-168.04)GEGS(-104.98)FS(-87.37)KPGDGGS(26.5)PS(-26.5)KPS(-74.7)DHEPPK	15	4	0.12687	By MS/MS	By MS/MS	411860000	411860000	0	0	0.15421	49560000	27939000	0.041867	0.018789	49560000	0	0	27939000	0	0	NaN
O14654	874	O14654	O14654	Insulin receptor substrate 4	IRS4	sp|O14654|IRS4_HUMAN Insulin receptor substrate 4 OS=Homo sapiens GN=IRS4 PE=1 SV=1	0.476168	0	0.000581116	40.254	30.795	40.254	0.476168	0	0.000581116	40.254							S	SGEGSFSKPGDGGSPSKPSDHEPPKNKAKRP	X;X;X;X;X;X;X;X;X;X;X;X;X;X;X;X;X;X;X;X;X;X;X;X;X;X;X;X;X;X;X	XXXXXXXXXXXXXXXXXXXXXXXXXXXXXXX	PS(0.001)GEGS(0.004)FS(0.013)KPGDGGS(0.476)PS(0.476)KPS(0.03)DHEPPK	PS(-29.05)GEGS(-20.52)FS(-15.62)KPGDGGS(0)PS(0)KPS(-12.04)DHEPPK	17	4	0.31406			0	0	0	0	0	0	0	0	0	0	0	0	0	0	0	NaN
O14654	751	O14654	O14654	Insulin receptor substrate 4	IRS4	sp|O14654|IRS4_HUMAN Insulin receptor substrate 4 OS=Homo sapiens GN=IRS4 PE=1 SV=1	1	74.9521	1.81131e-10	121.02	105.64	121.02	1	74.9521	1.81131e-10	121.02	1	70.2636	9.70853e-07	108.56		1	S	PFEDSRGYMMMFPRVSPPPAPSPPKAPDTNK	X;X;X;X;X;X;X;X;Oxidation (M);Oxidation (M);Oxidation (M);X;X;X;X;Phospho (STY);X;X;X;X;X;X;X;X;X;X;X;X;X;X;X	XXXXXXXXXXXXXXPPPPPPPPPPPXXXXXX	VS(1)PPPAPSPPK	VS(74.95)PPPAPS(-74.95)PPK	2	2	-0.58472	By MS/MS	By MS/MS	166910000	166910000	0	0	0.28888	28783000	76607000	0.076321	0.3818	28783000	0	0	76607000	0	0	0.40323
O14654	757	O14654	O14654	Insulin receptor substrate 4	IRS4	sp|O14654|IRS4_HUMAN Insulin receptor substrate 4 OS=Homo sapiens GN=IRS4 PE=1 SV=1	0.967395	15.5665	0.00109626	54.441	46.637	54.441					0.967395	15.5665	0.00109626	54.441		1	S	GYMMMFPRVSPPPAPSPPKAPDTNKEDDSKD	X;X;Oxidation (M);Oxidation (M);Oxidation (M);X;X;X;X;X;X;X;X;X;X;Phospho (STY);X;X;X;X;X;X;X;X;X;X;X;X;X;X;X	XXXXXXXXPPPPPPPPPPPPPPPPPPPPPPX	VSPPPAPS(0.967)PPKAPDT(0.027)NKEDDS(0.005)K	VS(-33.19)PPPAPS(15.57)PPKAPDT(-15.57)NKEDDS(-22.62)K	8	3	0.21334		By MS/MS	26376000	26376000	0	0	0.045651	0	26376000	0	0.13145	0	0	0	26376000	0	0	NaN
Q4VXL8;O95359	792;2702	Q4VXL8	Q4VXL8	Transforming acidic coiled-coil-containing protein 2	TACC2	tr|Q4VXL8|Q4VXL8_HUMAN Transforming acidic coiled-coil-containing protein 2 OS=Homo sapiens GN=TACC2 PE=1 SV=1;sp|O95359|TACC2_HUMAN Transforming acidic coiled-coil-containing protein 2 OS=Homo sapiens GN=TACC2 PE=1 SV=3	1	48.1115	6.11888e-05	77.527	34.958	48.112	1	77.5268	6.11888e-05	77.527	1	48.1115	0.00279683	50.155		1	S	MRIEALKLARQIALASRSHQDAKREAAHPTD	X;X;X;X;X;X;X;X;X;X;X;X;X;X;X;Phospho (STY);X;X;X;X;X;X;X;X;X;X;X;X;X;X;X	XXPPPPPPPPPPPPPPPXXXXXXXXXXXXXX	IEALKLARQIALAS(1)R	IEALKLARQIALAS(48.11)R	14	3	-0.822	By MS/MS	By MS/MS	52180000	52180000	0	0	NaN	32293000	19887000	NaN	NaN	32293000	0	0	19887000	0	0	NaN
P78527;F5GX40	140;45	P78527	P78527	DNA-dependent protein kinase catalytic subunit	PRKDC	sp|P78527|PRKDC_HUMAN DNA-dependent protein kinase catalytic subunit OS=Homo sapiens GN=PRKDC PE=1 SV=3;tr|F5GX40|F5GX40_HUMAN DNA-dependent protein kinase catalytic subunit (Fragment) OS=Homo sapiens GN=PRKDC PE=1 SV=1	0.333333	0	0.00808593	77.674	20.115	77.674	0.333333	0	0.00808593	77.674							S	IPALDLLIKLLQTFRSSRLMDEFKIGELFSK	X;X;X;X;X;X;X;X;X;X;X;X;X;X;X;X;X;X;X;X;X;X;X;X;X;X;X;X;X;X;X	XXXXXXXXXXXXXXXXXXXXXXXXXXXXXXX	LLQT(0.333)FRS(0.333)S(0.333)R	LLQT(0)FRS(0)S(0)R	7	2	-1.7104			0	0	0	0	NaN	0	0	NaN	NaN	0	0	0	0	0	0	NaN
P78527;F5GX40	141;46	P78527	P78527	DNA-dependent protein kinase catalytic subunit	PRKDC	sp|P78527|PRKDC_HUMAN DNA-dependent protein kinase catalytic subunit OS=Homo sapiens GN=PRKDC PE=1 SV=3;tr|F5GX40|F5GX40_HUMAN DNA-dependent protein kinase catalytic subunit (Fragment) OS=Homo sapiens GN=PRKDC PE=1 SV=1	0.333333	0	0.00808593	77.674	20.115	77.674	0.333333	0	0.00808593	77.674							S	PALDLLIKLLQTFRSSRLMDEFKIGELFSKF	X;X;X;X;X;X;X;X;X;X;X;X;X;X;X;X;X;X;X;X;X;X;X;X;X;X;X;X;X;X;X	XXXXXXXXXXXXXXXXXXXXXXXXXXXXXXX	LLQT(0.333)FRS(0.333)S(0.333)R	LLQT(0)FRS(0)S(0)R	8	2	-1.7104			0	0	0	0	NaN	0	0	NaN	NaN	0	0	0	0	0	0	NaN
Q8ND56	192	Q8ND56	Q8ND56	Protein LSM14 homolog A	LSM14A	sp|Q8ND56|LS14A_HUMAN Protein LSM14 homolog A OS=Homo sapiens GN=LSM14A PE=1 SV=3	0.496385	0	0.00238505	44.264	35.556	44.264	0.496385	0	0.00238505	44.264	0	0		NaN			S	LSQGRSSPQLDPLRKSPTMEQAVQTASAHLP	X;X;X;X;X;Phospho (STY);X;X;X;X;X;X;X;X;X;Phospho (STY);X;X;X;X;X;X;X;X;X;X;X;X;X;X;X	XXXXXXXXXXXXXXXPPPPPPPPPPPPPPPP	S(0.496)PT(0.496)MEQAVQT(0.004)AS(0.004)AHLPAPAAVGR	S(0)PT(0)MEQAVQT(-21.38)AS(-21.38)AHLPAPAAVGR	1	3	-0.24181			0	0	0	0	NaN	0	0	NaN	NaN	0	0	0	0	0	0	NaN
Q8ND56	182	Q8ND56	Q8ND56	Protein LSM14 homolog A	LSM14A	sp|Q8ND56|LS14A_HUMAN Protein LSM14 homolog A OS=Homo sapiens GN=LSM14A PE=1 SV=3	0.5	0	0.0113247	56.548	38.739	56.548	0.5	0	0.0217405	42.109	0.5	0	0.0113247	56.548		1	S	TQDTRSLKTQLSQGRSSPQLDPLRKSPTMEQ	X;X;X;X;X;X;X;X;X;X;X;X;X;X;X;Phospho (STY);X;X;X;X;X;X;X;X;X;Phospho (STY);X;X;X;X;X	XXXXXXXXXXXXXXXPPPPPPPPPXXXXXXX	S(0.5)S(0.5)PQLDPLR	S(0)S(0)PQLDPLR	1	2	0.46967	By MS/MS	By MS/MS	7194400	7194400	0	0	0.71807	3078300	4116000	0.80638	0.6637	3078300	0	0	4116000	0	0	NaN
Q8ND56	183	Q8ND56	Q8ND56	Protein LSM14 homolog A	LSM14A	sp|Q8ND56|LS14A_HUMAN Protein LSM14 homolog A OS=Homo sapiens GN=LSM14A PE=1 SV=3	0.5	0	0.0113247	56.548	38.739	56.548	0.5	0	0.0217405	42.109	0.5	0	0.0113247	56.548		1	S	QDTRSLKTQLSQGRSSPQLDPLRKSPTMEQA	X;X;X;X;X;X;X;X;X;X;X;X;X;X;X;X;X;X;X;X;X;X;X;X;Phospho (STY);X;X;X;X;X;X	XXXXXXXXXXXXXXXXXXXXXXXXXXXXXXX	S(0.5)S(0.5)PQLDPLR	S(0)S(0)PQLDPLR	2	2	0.46967	By MS/MS	By MS/MS	7194400	7194400	0	0	0.71807	3078300	4116000	0.80638	0.6637	3078300	0	0	4116000	0	0	NaN
Q9Y2W1	243	Q9Y2W1	Q9Y2W1	Thyroid hormone receptor-associated protein 3	THRAP3	sp|Q9Y2W1|TR150_HUMAN Thyroid hormone receptor-associated protein 3 OS=Homo sapiens GN=THRAP3 PE=1 SV=2	0.967831	14.7862	0.0098667	53.569	35.533	53.569	0	0		NaN	0.967831	14.7862	0.0098667	53.569		1	S	YGTGSASRASAVSELSPRERSPALKSPLQSV	X;X;X;X;X;X;X;X;X;X;X;X;X;X;X;Phospho (STY);X;X;X;X;X;X;X;X;X;X;X;X;X;X;X	XXXXXXXXPPPPPPPPPPXXXXXXXXXXXXX	ASAVS(0.032)ELS(0.968)PR	AS(-46.91)AVS(-14.79)ELS(14.79)PR	8	2	0.41585	By matching	By MS/MS	3045800	3045800	0	0	NaN	666320	2379400	NaN	NaN	666320	0	0	2379400	0	0	NaN
A6NEE1	431	A6NEE1	A6NEE1	Pleckstrin homology domain-containing family D member 1	PLEKHD1	sp|A6NEE1|PLHD1_HUMAN Pleckstrin homology domain-containing family D member 1 OS=Homo sapiens GN=PLEKHD1 PE=2 SV=3	0.9999	39.9936	0.00145581	45.653	14.056	45.653					0.9999	39.9936	0.00145581	45.653			T	MPVIMKNSVYIHKAATRRIKSCRFHRRRSST	X;X;X;X;X;X;X;X;X;Phospho (STY);X;X;X;X;X;Phospho (STY);X;X;X;X;X;X;X;X;X;X;X;X;X;X;X	XXXXXXPPPPPPPPPPPXXXXXXXXXXXXXX	NS(0.004)VY(0.996)IHKAAT(1)R	NS(-23.74)VY(23.74)IHKAAT(39.99)R	10	2	-4.1399		By matching	995420	0	995420	0	NaN	0	995420	NaN	NaN	0	0	0	0	995420	0	NaN
C9JDZ2;Q9NVQ4	25;25	C9JDZ2	C9JDZ2	Fas apoptotic inhibitory molecule 1	FAIM	tr|C9JDZ2|C9JDZ2_HUMAN Fas apoptotic inhibitory molecule 1 (Fragment) OS=Homo sapiens GN=FAIM PE=1 SV=1;sp|Q9NVQ4|FAIM1_HUMAN Fas apoptotic inhibitory molecule 1 OS=Homo sapiens GN=FAIM PE=1 SV=1	0.333333	0	0.0143239	43.083	30.556	43.083	0.333333	0	0.0143239	43.083							T	VALSDGVHKIEFEHGTTSGKRVVYVDGKEEI	X;X;X;X;X;X;X;X;X;X;X;X;X;X;X;Phospho (STY);X;X;X;X;X;X;X;X;X;X;X;X;X;X;X	XXXXXXXXXPPPPPPPPPPPXXXXXXXXXXX	IEFEHGT(0.333)T(0.333)S(0.333)GK	IEFEHGT(0)T(0)S(0)GK	7	2	-0.55583			0	0	0	0	NaN	0	0	NaN	NaN	0	0	0	0	0	0	NaN
C9JDZ2;Q9NVQ4	26;26	C9JDZ2	C9JDZ2	Fas apoptotic inhibitory molecule 1	FAIM	tr|C9JDZ2|C9JDZ2_HUMAN Fas apoptotic inhibitory molecule 1 (Fragment) OS=Homo sapiens GN=FAIM PE=1 SV=1;sp|Q9NVQ4|FAIM1_HUMAN Fas apoptotic inhibitory molecule 1 OS=Homo sapiens GN=FAIM PE=1 SV=1	0.333333	0	0.0143239	43.083	30.556	43.083	0.333333	0	0.0143239	43.083							T	ALSDGVHKIEFEHGTTSGKRVVYVDGKEEIR	X;X;X;X;X;X;X;X;X;X;X;X;X;X;X;X;X;X;X;X;X;X;X;X;X;X;X;X;X;X;X	XXXXXXXXXXXXXXXXXXXXXXXXXXXXXXX	IEFEHGT(0.333)T(0.333)S(0.333)GK	IEFEHGT(0)T(0)S(0)GK	8	2	-0.55583			0	0	0	0	NaN	0	0	NaN	NaN	0	0	0	0	0	0	NaN
H0YD61	25	H0YD61	H0YD61		RAD51	tr|H0YD61|H0YD61_HUMAN DNA repair protein RAD51 homolog 1 (Fragment) OS=Homo sapiens GN=RAD51 PE=4 SV=1	0.333333	0	0.0187778	45.368	8.9435	45.368	0.333333	0	0.0187778	45.368							T	INIKGISEAKADKILTESRSVARLECNSVIL	X;X;X;X;X;X;X;X;X;X;X;X;X;X;X;Phospho (STY);X;X;X;X;X;X;X;X;X;X;X;X;X;X;X	XXXXXXXXXXPPPPPPPPPPPPPXXXXXXXX	ADKILT(0.333)ES(0.333)RS(0.333)VAR	ADKILT(0)ES(0)RS(0)VAR	6	2	1.3652			0	0	0	0	NaN	0	0	NaN	NaN	0	0	0	0	0	0	NaN
O14654	1105	O14654	O14654	Insulin receptor substrate 4	IRS4	sp|O14654|IRS4_HUMAN Insulin receptor substrate 4 OS=Homo sapiens GN=IRS4 PE=1 SV=1	0.499952	0	0.00360989	59.227	41.154	59.227					0.499952	0	0.00360989	59.227		1	T	QSFFAAARAAVSAFPTDSLERDLSPSSAPAV	X;X;X;X;X;X;X;X;X;X;X;X;X;X;X;Phospho (STY);X;X;X;X;X;X;X;X;X;X;X;X;X;X;X	XXXXXXXXPPPPPPPPPPPPPXXXXXXXXXX	AAVSAFPT(0.5)DS(0.5)LER	AAVS(-37.17)AFPT(0)DS(0)LER	8	2	-0.018395		By MS/MS	7531600	7531600	0	0	0.0026459	0	7531600	0	0.005883	0	0	0	7531600	0	0	NaN
P21439	910	P21439	P21439	Multidrug resistance protein 3	ABCB4	sp|P21439|MDR3_HUMAN Phosphatidylcholine translocator ABCB4 OS=Homo sapiens GN=ABCB4 PE=1 SV=2	0.499597	0	0.0212793	42.599	6.2034	42.599	0.499597	0	0.0212793	42.599	0	0		NaN			T	IATEAIENIRTVVSLTQERKFESMYVEKLYG	X;X;X;X;X;X;X;X;X;X;X;X;X;X;X;X;X;X;X;X;X;X;X;X;X;X;X;X;X;X;X	XXXXXXXXXXXXXXXXXXXXXXXXXXXXXXX	T(0.001)VVS(0.5)LT(0.5)QER	T(-27.92)VVS(0)LT(0)QER	6	2	-1.5724			0	0	0	0	NaN	0	0	NaN	NaN	0	0	0	0	0	0	NaN
P42704	992	P42704	P42704	Leucine-rich PPR motif-containing protein, mitochondrial	LRPPRC	sp|P42704|LPPRC_HUMAN Leucine-rich PPR motif-containing protein, mitochondrial OS=Homo sapiens GN=LRPPRC PE=1 SV=3	1	52.0715	0.0152362	52.071	26.126	52.071	1	52.0715	0.0152362	52.071	0	0		NaN		1	T	VWNKIQEENVIPREKTLRLLAEILREGNQEV	X;X;X;X;X;X;X;X;X;X;X;X;X;X;X;Phospho (STY);X;X;X;X;X;X;X;X;X;X;X;X;X;X;X	XXXXPPPPPPPPPPPPPPXXXXXXXXXXXXX	IQEENVIPREKT(1)LR	IQEENVIPREKT(52.07)LR	12	3	1.2483	By MS/MS	By matching	32158000	32158000	0	0	NaN	28141000	4017000	NaN	NaN	28141000	0	0	4017000	0	0	NaN
P78527;F5GX40	137;42	P78527	P78527	DNA-dependent protein kinase catalytic subunit	PRKDC	sp|P78527|PRKDC_HUMAN DNA-dependent protein kinase catalytic subunit OS=Homo sapiens GN=PRKDC PE=1 SV=3;tr|F5GX40|F5GX40_HUMAN DNA-dependent protein kinase catalytic subunit (Fragment) OS=Homo sapiens GN=PRKDC PE=1 SV=1	0.333333	0	0.00808593	77.674	20.115	77.674	0.333333	0	0.00808593	77.674							T	KCKIPALDLLIKLLQTFRSSRLMDEFKIGEL	X;X;X;X;X;X;X;X;X;X;X;X;X;X;X;Phospho (STY);X;X;X;X;X;X;X;X;X;X;X;X;X;X;X	XXXXXXXXXXXXPPPPPPPPPXXXXXXXXXX	LLQT(0.333)FRS(0.333)S(0.333)R	LLQT(0)FRS(0)S(0)R	4	2	-1.7104			0	0	0	0	NaN	0	0	NaN	NaN	0	0	0	0	0	0	NaN
Q68D06;Q7Z7L1	505;505	Q68D06	Q68D06	Schlafen family member 13;Schlafen family member 11	SLFN13;SLFN11	sp|Q68D06|SLN13_HUMAN Schlafen family member 13 OS=Homo sapiens GN=SLFN13 PE=2 SV=1;sp|Q7Z7L1|SLN11_HUMAN Schlafen family member 11 OS=Homo sapiens GN=SLFN11 PE=1 SV=2	1	54.1572	0.00374624	54.157	14.054	54.157	1	54.1572	0.00374624	54.157						2	T	TAFTLKQKLVNMGGYTGKVCVRAKVLCLSPE	X;X;X;X;X;X;X;X;X;X;X;X;X;X;Phospho (STY);Phospho (STY);X;X;X;X;X;X;X;X;X;X;X;X;X;X;X	XXXXXXXXPPPPPPPPPPXXXXXXXXXXXXX	LVNMGGY(1)T(1)GK	LVNMGGY(54.16)T(54.16)GK	8	2	-3.4968	By MS/MS		0	0	0	0	NaN	0	0	NaN	NaN	0	0	0	0	0	0	NaN
Q8ND56	194	Q8ND56	Q8ND56	Protein LSM14 homolog A	LSM14A	sp|Q8ND56|LS14A_HUMAN Protein LSM14 homolog A OS=Homo sapiens GN=LSM14A PE=1 SV=3	0.496385	0	0.00238505	44.264	35.556	44.264	0.496385	0	0.00238505	44.264	0	0		NaN			T	QGRSSPQLDPLRKSPTMEQAVQTASAHLPAP	X;X;X;Phospho (STY);X;X;X;X;X;X;X;X;X;X;X;X;X;X;X;X;X;X;X;X;X;X;X;X;X;X;X	XXXXXXXXXXXXXXXXXXXXXXXXXXXXXXX	S(0.496)PT(0.496)MEQAVQT(0.004)AS(0.004)AHLPAPAAVGR	S(0)PT(0)MEQAVQT(-21.38)AS(-21.38)AHLPAPAAVGR	3	3	-0.24181			0	0	0	0	NaN	0	0	NaN	NaN	0	0	0	0	0	0	NaN
Q9H8V3	235	Q9H8V3	Q9H8V3	Protein ECT2	ECT2	sp|Q9H8V3|ECT2_HUMAN Protein ECT2 OS=Homo sapiens GN=ECT2 PE=1 SV=4	0.831868	7.74156	0.00885608	46.159	22.986	46.159	0.831868	7.74156	0.00885608	46.159	0	0		NaN		1	T	NCTQGEKFRVAVSLGTPIMKPEWIYKAWERR	X;X;X;X;X;X;X;X;X;X;X;X;X;X;X;Phospho (STY);X;X;X;X;X;X;X;X;X;X;X;X;X;X;X	XXXXXXXXXPPPPPPPPPPPPPPPPPPPPPX	VAVS(0.028)LGT(0.832)PIMKPEWIY(0.14)KAWER	VAVS(-14.7)LGT(7.74)PIMKPEWIY(-7.74)KAWER	7	3	0.26359	By MS/MS	By matching	16943000	16943000	0	0	NaN	11730000	5212400	NaN	NaN	11730000	0	0	5212400	0	0	NaN
A6NEE1	425	A6NEE1	A6NEE1	Pleckstrin homology domain-containing family D member 1	PLEKHD1	sp|A6NEE1|PLHD1_HUMAN Pleckstrin homology domain-containing family D member 1 OS=Homo sapiens GN=PLEKHD1 PE=2 SV=3	0.995792	23.7404	0.00145581	45.653	14.056	45.653					0.995792	23.7404	0.00145581	45.653			Y	AELEAKMPVIMKNSVYIHKAATRRIKSCRFH	X;X;X;X;X;X;X;X;X;X;X;X;X;X;X;Phospho (STY);X;X;X;X;X;Phospho (STY);X;X;X;X;X;X;X;X;X	XXXXXXXXXXXXPPPPPPPPPPPXXXXXXXX	NS(0.004)VY(0.996)IHKAAT(1)R	NS(-23.74)VY(23.74)IHKAAT(39.99)R	4	2	-4.1399		By matching	995420	0	995420	0	NaN	0	995420	NaN	NaN	0	0	0	0	995420	0	NaN
O14654	921	O14654	O14654	Insulin receptor substrate 4	IRS4	sp|O14654|IRS4_HUMAN Insulin receptor substrate 4 OS=Homo sapiens GN=IRS4 PE=1 SV=1	0.998185	27.9222	1.52616e-14	137.16	120.9	137.16					0.998185	27.9222	1.52616e-14	137.16		1	Y	QKPTHEQREADSSSDYVNMDFTKRESNTPAP	X;X;X;X;X;X;X;X;X;X;X;X;X;X;X;Phospho (STY);X;X;X;X;X;X;X;X;X;X;X;X;X;X;X	XXXXXXXXPPPPPPPPPPPPPPPXXXXXXXX	EADSSS(0.002)DY(0.998)VNMDFTK	EADS(-41.53)S(-38.8)S(-27.92)DY(27.92)VNMDFT(-56.45)K	8	2	-0.039774		By MS/MS	28702000	28702000	0	0	0.01438	0	28702000	0	0.066601	0	0	0	28702000	0	0	NaN
O14654	111	O14654	O14654	Insulin receptor substrate 4	IRS4	sp|O14654|IRS4_HUMAN Insulin receptor substrate 4 OS=Homo sapiens GN=IRS4 PE=1 SV=1	0.990158	20.0261	0.00240757	85.064	58.462	85.064					0.990158	20.0261	0.00240757	85.064		1	Y	FVLKLETADAPARLEYYENARKFRHSVRAAA	X;X;X;X;X;X;X;X;X;X;X;X;X;X;X;Phospho (STY);X;X;X;X;X;X;X;X;X;X;X;X;X;X;X	XXXXXXXXXXXXXPPPPPPPPXXXXXXXXXX	LEY(0.99)Y(0.01)ENAR	LEY(20.03)Y(-20.03)ENAR	3	2	0.53559		By MS/MS	0	0	0	0	0	0	0	0	0	0	0	0	0	0	0	NaN
O14654	112	O14654	O14654	Insulin receptor substrate 4	IRS4	sp|O14654|IRS4_HUMAN Insulin receptor substrate 4 OS=Homo sapiens GN=IRS4 PE=1 SV=1	0.999343	31.8201	0.00334475	155.51	127.98	155.51					0.999343	31.8201	0.00334475	155.51	+	1	Y	VLKLETADAPARLEYYENARKFRHSVRAAAA	X;X;X;X;X;X;X;X;X;X;X;X;X;X;X;Phospho (STY);X;X;X;X;X;X;X;X;X;X;X;X;X;X;X	XXXXXXXXXXXXPPPPPPPPXXXXXXXXXXX	LEY(0.001)Y(0.999)ENAR	LEY(-31.82)Y(31.82)ENAR	4	2	-0.25037		By MS/MS	21227000	21227000	0	0	0.017382	0	21227000	0	0.057163	0	0	0	21227000	0	0	NaN
O14654	656	O14654	O14654	Insulin receptor substrate 4	IRS4	sp|O14654|IRS4_HUMAN Insulin receptor substrate 4 OS=Homo sapiens GN=IRS4 PE=1 SV=1	1	77.6741	0.0141122	77.674	65.769	77.674					1	77.6741	0.0141122	77.674	+	1	Y	GGTGGKGKSGGRFRLYFCVDRGATKECKEAK	X;X;X;X;X;X;X;X;X;X;X;X;X;X;X;Phospho (STY);X;X;X;X;X;X;X;X;X;X;X;X;X;X;X	XXXXXXXXXXXXXXPPPPPPPXXXXXXXXXX	LY(1)FCVDR	LY(77.67)FCVDR	2	2	0.33903		By MS/MS	5734100	5734100	0	0	0.012464	0	5734100	0	0.029147	0	0	0	5734100	0	0	NaN
O14654	828	O14654	O14654	Insulin receptor substrate 4	IRS4	sp|O14654|IRS4_HUMAN Insulin receptor substrate 4 OS=Homo sapiens GN=IRS4 PE=1 SV=1	0.647055	2.63837	5.08361e-06	76.262	54.705	76.262					0.647055	2.63837	5.08361e-06	76.262		1	Y	NPFRSSPLGQNDNSEYVPMLPGKFLGRGLDK	X;X;X;X;X;X;X;X;X;X;X;X;X;X;X;Phospho (STY);X;X;Oxidation (M);X;X;X;X;X;X;X;X;X;X;X;X	XXXXPPPPPPPPPPPPPPPPPPPXXXXXXXX	SSPLGQNDNS(0.352)EY(0.647)VPMLPGK	S(-34.22)S(-34.22)PLGQNDNS(-2.64)EY(2.64)VPMLPGK	12	2	0.15769		By MS/MS	34815000	34815000	0	0	0.018029	0	34815000	0	0.05575	0	0	0	34815000	0	0	NaN
Q68D06;Q7Z7L1	504;504	Q68D06	Q68D06	Schlafen family member 13;Schlafen family member 11	SLFN13;SLFN11	sp|Q68D06|SLN13_HUMAN Schlafen family member 13 OS=Homo sapiens GN=SLFN13 PE=2 SV=1;sp|Q7Z7L1|SLN11_HUMAN Schlafen family member 11 OS=Homo sapiens GN=SLFN11 PE=1 SV=2	1	54.1572	0.00374624	54.157	14.054	54.157	1	54.1572	0.00374624	54.157						2	Y	RTAFTLKQKLVNMGGYTGKVCVRAKVLCLSP	X;X;X;X;X;X;X;X;X;X;X;X;X;X;X;Phospho (STY);Phospho (STY);X;X;X;X;X;X;X;X;X;X;X;X;X;X	XXXXXXXXXPPPPPPPPPPXXXXXXXXXXXX	LVNMGGY(1)T(1)GK	LVNMGGY(54.16)T(54.16)GK	7	2	-3.4968	By MS/MS		0	0	0	0	NaN	0	0	NaN	NaN	0	0	0	0	0	0	NaN
[truncated: 27 more columns]
