# Supplementary material for: FER-mediated phosphorylation and PIK3R2 recruitment on IRS4 promotes AKT activation and tumorigenesis in ovarian cancer cells
Source: eLife. 2022 May 12;11:e76183. doi: 10.7554/eLife.76183 (PMC9098222; doi:10.7554/eLife.76183)
Supplement: Supplementary file 10. — Exploration for differences in binding proteins between IRS4-WT and multiple IRS4-YF in OVCAR-5 cells in Figure 5A–G. The details of raw data analysis and database search have been described in the section of Materials and methods. The analyzed MS data was provided in Supplementary files 10-12. The IRS4-WT, IRS4-Y779F, IRS4-Y847F, and IRS4-Y921F interactome is shown in this file. [file elife-76183-supp10.xlsx]

## Sheet: proteinGroups
	Groups	Samples
	IRS4-WT	A1	A2	A3
	IRS4-Y779F	B1	B2	B3
	IRS4-Y847F	C1	C2	C3
	IRS4-Y921F	D1	D2	D3
Protein IDs	Majority protein IDs	Peptide counts (all)	Peptide counts (razor+unique)	Peptide counts (unique)	Protein names	Gene names	Fasta headers	Number of proteins	Peptides	Razor + unique peptides	Unique peptides	Peptides A1	Peptides A2	Peptides A3	Peptides B1	Peptides B2	Peptides B3	Peptides C1	Peptides C2	Peptides C3	Peptides D1	Peptides D2	Peptides D3	Razor + unique peptides A1	Razor + unique peptides A2	Razor + unique peptides A3	Razor + unique peptides B1	Razor + unique peptides B2	Razor + unique peptides B3	Razor + unique peptides C1	Razor + unique peptides C2	Razor + unique peptides C3	Razor + unique peptides D1	Razor + unique peptides D2	Razor + unique peptides D3	Unique peptides A1	Unique peptides A2	Unique peptides A3	Unique peptides B1	Unique peptides B2	Unique peptides B3	Unique peptides C1	Unique peptides C2	Unique peptides C3	Unique peptides D1	Unique peptides D2	Unique peptides D3	Sequence coverage [%]	Unique + razor sequence coverage [%]
E5RIU6;A0A087WZZ9;A0A024QZP7;P06493;K7ELV5;E7ESI2;G3V5T9;P24941;Q00526;G3V317;F8VXD2;F8VYH9;F8VZZ0;F8VTV8;F8VWX7;F8VZ51;K7EJ83;H0YAZ9;Q9BVE2;E7EUK8;E5RGN0;A0A087X209;A0A087WZU2;F5H6Z0;J3QSD7;Q00535;P11802;Q00534;P50750;Q96Q40;O94921;Q07002;Q00536;Q00537;Q9NYV4;Q14004	E5RIU6;A0A087WZZ9;A0A024QZP7;P06493;K7ELV5;E7ESI2;G3V5T9;P24941;Q00526	3;3;3;3;2;2;2;2;2;1;1;1;1;1;1;1;1;1;1;1;1;1;1;1;1;1;1;1;1;1;1;1;1;1;1;1	3;3;3;3;2;2;2;2;2;1;1;1;1;1;1;1;1;1;1;1;1;1;1;1;1;1;1;1;1;1;1;1;1;1;1;1	3;3;3;3;2;2;2;2;2;1;1;1;1;1;1;1;1;1;1;1;1;1;1;1;1;1;1;1;1;1;1;1;1;1;1;1	Cyclin-dependent kinase 1;Cyclin-dependent kinase 2;Cyclin-dependent kinase 3	CDK1;CDC2;CDK3;CDK2	tr|E5RIU6|E5RIU6_HUMAN Cyclin-dependent kinase 1 (Fragment) OS=Homo sapiens GN=CDK1 PE=1 SV=2;tr|A0A087WZZ9|A0A087WZZ9_HUMAN Cyclin-dependent kinase 1 OS=Homo sapiens GN=CDK1 PE=1 SV=1;tr|A0A024QZP7|A0A024QZP7_HUMAN Cell division cycle 2, G1 to S and G2 to	36	3	3	3	0	0	1	1	0	2	3	3	2	1	1	1	0	0	1	1	0	2	3	3	2	1	1	1	0	0	1	1	0	2	3	3	2	1	1	1	17.5	17.5
A0A024R4E5;Q00341;H0Y394;H7C0A4;C9JIZ1;C9J5E5;C9JZI8;C9JHS7;C9JHZ8;C9JES8;H7C2D1;H7BZC3;C9JT62;C9JK79;C9JBS3;C9JEJ8;A0A0U1RVI6;C9JHN6;C9JQ82;C9JMQ6;C9JHS9;C9J739;H7C3D0	A0A024R4E5;Q00341;H0Y394	38;37;26;15;12;11;9;8;8;8;7;6;5;5;4;4;4;4;3;2;1;1;1	38;37;26;15;12;11;9;8;8;8;7;6;5;5;4;4;4;4;3;2;1;1;1	38;37;26;15;12;11;9;8;8;8;7;6;5;5;4;4;4;4;3;2;1;1;1	Vigilin	HDLBP	tr|A0A024R4E5|A0A024R4E5_HUMAN High density lipoprotein binding protein (Vigilin), isoform CRA_a OS=Homo sapiens GN=HDLBP PE=1 SV=1;sp|Q00341|VIGLN_HUMAN Vigilin OS=Homo sapiens GN=HDLBP PE=1 SV=2;tr|H0Y394|H0Y394_HUMAN Vigilin (Fragment) OS=Homo sapiens G	23	38	38	38	25	26	28	32	28	27	29	32	25	27	27	33	25	26	28	32	28	27	29	32	25	27	27	33	25	26	28	32	28	27	29	32	25	27	27	33	37.3	37.3
A0A024R4M0;P46781;B5MCT8;C9JM19;F2Z3C0;A8MXK4	A0A024R4M0;P46781;B5MCT8;C9JM19	9;9;7;7;3;3	9;9;7;7;3;3	9;9;7;7;3;3	40S ribosomal protein S9	RPS9	tr|A0A024R4M0|A0A024R4M0_HUMAN 40S ribosomal protein S9 OS=Homo sapiens GN=RPS9 PE=1 SV=1;sp|P46781|RS9_HUMAN 40S ribosomal protein S9 OS=Homo sapiens GN=RPS9 PE=1 SV=3;tr|B5MCT8|B5MCT8_HUMAN 40S ribosomal protein S9 OS=Homo sapiens GN=RPS9 PE=1 SV=1;tr|C9	6	9	9	9	9	9	8	6	9	9	9	8	8	9	9	9	9	9	8	6	9	9	9	8	8	9	9	9	9	9	8	6	9	9	9	8	8	9	9	9	35.1	35.1
A0A075B6E5;A0A0U1RRM6;Q8N8S7;A0A0U1RQP7	A0A075B6E5;A0A0U1RRM6;Q8N8S7;A0A0U1RQP7	3;3;3;2	3;3;3;2	3;3;3;2	Protein enabled homolog	ENAH	tr|A0A075B6E5|A0A075B6E5_HUMAN Protein enabled homolog (Fragment) OS=Homo sapiens GN=ENAH PE=1 SV=2;tr|A0A0U1RRM6|A0A0U1RRM6_HUMAN Protein enabled homolog OS=Homo sapiens GN=ENAH PE=1 SV=1;sp|Q8N8S7|ENAH_HUMAN Protein enabled homolog OS=Homo sapiens GN=ENA	4	3	3	3	2	2	2	0	2	2	3	1	0	2	1	1	2	2	2	0	2	2	3	1	0	2	1	1	2	2	2	0	2	2	3	1	0	2	1	1	15.5	15.5
A0A087WT45;A0A075B793;Q4V328;A0A087WXA6;A0A087WZF5	A0A087WT45;A0A075B793;Q4V328	5;5;5;2;1	5;5;5;2;1	5;5;5;2;1	GRIP1-associated protein 1	GRIPAP1	tr|A0A087WT45|A0A087WT45_HUMAN GRIP1-associated protein 1 OS=Homo sapiens GN=GRIPAP1 PE=1 SV=1;tr|A0A075B793|A0A075B793_HUMAN GRIP1-associated protein 1 OS=Homo sapiens GN=GRIPAP1 PE=1 SV=2;sp|Q4V328|GRAP1_HUMAN GRIP1-associated protein 1 OS=Homo sapiens G	5	5	5	5	1	2	2	0	3	3	0	2	2	1	2	1	1	2	2	0	3	3	0	2	2	1	2	1	1	2	2	0	3	3	0	2	2	1	2	1	7.2	7.2
A0A087WT53;Q96QZ7;A0A087WXD2;H7C5T8;H7C4U7;H7C535	A0A087WT53;Q96QZ7;A0A087WXD2;H7C5T8;H7C4U7;H7C535	2;2;1;1;1;1	2;2;1;1;1;1	2;2;1;1;1;1	Membrane-associated guanylate kinase, WW and PDZ domain-containing protein 1	MAGI1	tr|A0A087WT53|A0A087WT53_HUMAN Membrane-associated guanylate kinase, WW and PDZ domain-containing protein 1 OS=Homo sapiens GN=MAGI1 PE=1 SV=1;sp|Q96QZ7|MAGI1_HUMAN Membrane-associated guanylate kinase, WW and PDZ domain-containing protein 1 OS=Homo sapien	6	2	2	2	1	1	1	1	2	2	1	2	1	2	2	1	1	1	1	1	2	2	1	2	1	2	2	1	1	1	1	1	2	2	1	2	1	2	2	1	2.9	2.9
M0QYH3;A0A087WTP3;Q92945;M0QXW7;M0R0I5	M0QYH3;A0A087WTP3;Q92945;M0QXW7;M0R0I5	2;2;2;1;1	2;2;2;1;1	2;2;2;1;1	Far upstream element-binding protein 2	KHSRP	tr|M0QYH3|M0QYH3_HUMAN Far upstream element-binding protein 2 (Fragment) OS=Homo sapiens GN=KHSRP PE=1 SV=1;tr|A0A087WTP3|A0A087WTP3_HUMAN Far upstream element-binding protein 2 OS=Homo sapiens GN=KHSRP PE=1 SV=1;sp|Q92945|FUBP2_HUMAN Far upstream element-	5	2	2	2	2	0	1	0	0	0	2	1	1	2	0	0	2	0	1	0	0	0	2	1	1	2	0	0	2	0	1	0	0	0	2	1	1	2	0	0	18.3	18.3
A0A087WTT1;P11940;E7EQV3;E7ERJ7;H0YAR2;Q9H361;H0YBN4;H0YAP2;E5RGH3;E5RH24;E5RJB9;H0YB86;Q4VXU2;H0YEQ8;B1ANR0;Q13310;H0YC10;E5RGC4;E5RFD8;E5RHG7;B1ANR1;H0YAS7;H0YAS6;H0YB75;H0YCC8;H0Y5F5;Q5JQF8;Q96DU9	A0A087WTT1;P11940;E7EQV3;E7ERJ7;H0YAR2	13;13;12;12;9;6;5;4;3;3;3;3;3;2;2;2;1;1;1;1;1;1;1;1;1;1;1;1	13;13;12;12;9;6;5;4;3;3;3;3;3;2;2;2;1;1;1;1;1;1;1;1;1;1;1;1	13;13;12;12;9;6;5;4;3;3;3;3;3;2;2;2;1;1;1;1;1;1;1;1;1;1;1;1	Polyadenylate-binding protein;Polyadenylate-binding protein 1	PABPC1	tr|A0A087WTT1|A0A087WTT1_HUMAN Polyadenylate-binding protein OS=Homo sapiens GN=PABPC1 PE=1 SV=1;sp|P11940|PABP1_HUMAN Polyadenylate-binding protein 1 OS=Homo sapiens GN=PABPC1 PE=1 SV=2;tr|E7EQV3|E7EQV3_HUMAN Polyadenylate-binding protein OS=Homo sapiens	28	13	13	13	9	9	9	7	7	7	7	9	6	6	10	6	9	9	9	7	7	7	7	9	6	6	10	6	9	9	9	7	7	7	7	9	6	6	10	6	28	28
A0A087WU44;Q3L8U1;J3KRH9;J3KSW5	A0A087WU44;Q3L8U1	12;12;3;3	12;12;3;3	12;12;3;3	Chromodomain-helicase-DNA-binding protein 9	CHD9	tr|A0A087WU44|A0A087WU44_HUMAN Chromodomain-helicase-DNA-binding protein 9 OS=Homo sapiens GN=CHD9 PE=1 SV=1;sp|Q3L8U1|CHD9_HUMAN Chromodomain-helicase-DNA-binding protein 9 OS=Homo sapiens GN=CHD9 PE=1 SV=2	4	12	12	12	11	11	10	10	10	12	10	11	9	8	9	10	11	11	10	10	10	12	10	11	9	8	9	10	11	11	10	10	10	12	10	11	9	8	9	10	17.5	17.5
E7ETK0;A0A087WUS0;P62847	E7ETK0;A0A087WUS0;P62847	4;4;4	4;4;4	4;4;4	40S ribosomal protein S24	RPS24	tr|E7ETK0|E7ETK0_HUMAN 40S ribosomal protein S24 OS=Homo sapiens GN=RPS24 PE=1 SV=1;tr|A0A087WUS0|A0A087WUS0_HUMAN 40S ribosomal protein S24 OS=Homo sapiens GN=RPS24 PE=1 SV=1;sp|P62847|RS24_HUMAN 40S ribosomal protein S24 OS=Homo sapiens GN=RPS24 PE=1 SV=	3	4	4	4	3	3	3	4	4	4	4	3	4	4	2	3	3	3	3	4	4	4	4	3	4	4	2	3	3	3	3	4	4	4	4	3	4	4	2	3	35.1	35.1
A0A087WUT6;O60841	A0A087WUT6;O60841	26;26	26;26	26;26	Eukaryotic translation initiation factor 5B	EIF5B	tr|A0A087WUT6|A0A087WUT6_HUMAN Eukaryotic translation initiation factor 5B OS=Homo sapiens GN=EIF5B PE=1 SV=1;sp|O60841|IF2P_HUMAN Eukaryotic translation initiation factor 5B OS=Homo sapiens GN=EIF5B PE=1 SV=4	2	26	26	26	15	19	18	16	21	21	17	22	22	19	20	21	15	19	18	16	21	21	17	22	22	19	20	21	15	19	18	16	21	21	17	22	22	19	20	21	27	27
A0A087WUV8;A0A087X2B5;P35613	A0A087WUV8;A0A087X2B5;P35613	1;1;1	1;1;1	1;1;1	Basigin	BSG	tr|A0A087WUV8|A0A087WUV8_HUMAN Basigin OS=Homo sapiens GN=BSG PE=1 SV=1;tr|A0A087X2B5|A0A087X2B5_HUMAN Basigin (Fragment) OS=Homo sapiens GN=BSG PE=1 SV=1;sp|P35613|BASI_HUMAN Basigin OS=Homo sapiens GN=BSG PE=1 SV=2	3	1	1	1	1	1	1	0	1	0	1	1	1	1	0	1	1	1	1	0	1	0	1	1	1	1	0	1	1	1	1	0	1	0	1	1	1	1	0	1	9.5	9.5
A0A087WV73;P46087;F5H359;F5H8G6;F5GWB7;F5H709;F5H5X6	A0A087WV73;P46087;F5H359;F5H8G6;F5GWB7;F5H709;F5H5X6	2;2;1;1;1;1;1	2;2;1;1;1;1;1	2;2;1;1;1;1;1	Probable 28S rRNA (cytosine(4447)-C(5))-methyltransferase	NOP2	tr|A0A087WV73|A0A087WV73_HUMAN Probable 28S rRNA (cytosine(4447)-C(5))-methyltransferase OS=Homo sapiens GN=NOP2 PE=1 SV=1;sp|P46087|NOP2_HUMAN Probable 28S rRNA (cytosine(4447)-C(5))-methyltransferase OS=Homo sapiens GN=NOP2 PE=1 SV=2;tr|F5H359|F5H359_HUM	7	2	2	2	1	0	1	0	1	0	0	1	0	0	0	0	1	0	1	0	1	0	0	1	0	0	0	0	1	0	1	0	1	0	0	1	0	0	0	0	2.9	2.9
K7EQH1;A0A087WVF1;Q5BIX2;Q96B23	K7EQH1;A0A087WVF1;Q5BIX2;Q96B23	1;1;1;1	1;1;1;1	1;1;1;1	Uncharacterized protein C18orf25	C18orf25;ARKL1	tr|K7EQH1|K7EQH1_HUMAN Uncharacterized protein C18orf25 (Fragment) OS=Homo sapiens GN=C18orf25 PE=1 SV=1;tr|A0A087WVF1|A0A087WVF1_HUMAN Uncharacterized protein C18orf25 OS=Homo sapiens GN=C18orf25 PE=1 SV=1;tr|Q5BIX2|Q5BIX2_HUMAN Chromosome 18 open reading	4	1	1	1	1	1	1	0	1	1	0	1	0	0	0	0	1	1	1	0	1	1	0	1	0	0	0	0	1	1	1	0	1	1	0	1	0	0	0	0	13	13
A0A087WVF7;Q9NZM3;E7EPJ2	A0A087WVF7;Q9NZM3;E7EPJ2	2;2;1	2;2;1	2;2;1	Intersectin-2	ITSN2	tr|A0A087WVF7|A0A087WVF7_HUMAN Intersectin-2 OS=Homo sapiens GN=ITSN2 PE=1 SV=1;sp|Q9NZM3|ITSN2_HUMAN Intersectin-2 OS=Homo sapiens GN=ITSN2 PE=1 SV=3;tr|E7EPJ2|E7EPJ2_HUMAN Intersectin-2 (Fragment) OS=Homo sapiens GN=ITSN2 PE=1 SV=1	3	2	2	2	2	2	2	2	2	2	1	2	2	1	2	2	2	2	2	2	2	2	1	2	2	1	2	2	2	2	2	2	2	2	1	2	2	1	2	2	1.3	1.3
A0A087WVQ6;Q00610;J3KS13;A0A087WX41;P53675	A0A087WVQ6;Q00610	4;4;1;1;1	4;4;1;1;1	4;4;1;1;1	Clathrin heavy chain;Clathrin heavy chain 1	CLTC	tr|A0A087WVQ6|A0A087WVQ6_HUMAN Clathrin heavy chain OS=Homo sapiens GN=CLTC PE=1 SV=1;sp|Q00610|CLH1_HUMAN Clathrin heavy chain 1 OS=Homo sapiens GN=CLTC PE=1 SV=5	5	4	4	4	4	3	3	3	3	3	3	3	3	3	4	3	4	3	3	3	3	3	3	3	3	3	4	3	4	3	3	3	3	3	3	3	3	3	4	3	3	3
F8W7S5;A0A087WVV2;A0A0A0MRV0;Q9P2E9;A0A087WU26	F8W7S5;A0A087WVV2;A0A0A0MRV0;Q9P2E9	3;3;3;3;1	3;3;3;3;1	3;3;3;3;1	Ribosome-binding protein 1	RRBP1	tr|F8W7S5|F8W7S5_HUMAN Ribosome-binding protein 1 OS=Homo sapiens GN=RRBP1 PE=1 SV=1;tr|A0A087WVV2|A0A087WVV2_HUMAN Ribosome-binding protein 1 OS=Homo sapiens GN=RRBP1 PE=1 SV=1;tr|A0A0A0MRV0|A0A0A0MRV0_HUMAN Ribosome-binding protein 1 OS=Homo sapiens GN=R	5	3	3	3	2	0	0	2	1	1	0	2	2	1	1	1	2	0	0	2	1	1	0	2	2	1	1	1	2	0	0	2	1	1	0	2	2	1	1	1	7.6	7.6
H0Y8D1;A6XMV8;Q5NV56;CON__P07477;A0A0J9YYC8;A0A087WW55;A0A0J9YW57;E7EQ64;A6XMV9;A0A0J9YXX4;Q8NHM4;P07478;P07477	H0Y8D1;A6XMV8;Q5NV56;CON__P07477;A0A0J9YYC8;A0A087WW55;A0A0J9YW57;E7EQ64;A6XMV9;A0A0J9YXX4;Q8NHM4;P07478;P07477	1;1;1;1;1;1;1;1;1;1;1;1;1	1;1;1;1;1;1;1;1;1;1;1;1;1	1;1;1;1;1;1;1;1;1;1;1;1;1	Putative trypsin-6;Trypsin-2;Trypsin-1;Alpha-trypsin chain 1;Alpha-trypsin chain 2	PRSS1;TRY8;PRSS3P2;PRSS2	tr|H0Y8D1|H0Y8D1_HUMAN Trypsin-1 (Fragment) OS=Homo sapiens GN=PRSS1 PE=1 SV=1;tr|A6XMV8|A6XMV8_HUMAN Protease serine 2 preproprotein OS=Homo sapiens GN=PRSS2 PE=1 SV=1;tr|Q5NV56|Q5NV56_HUMAN Anionic trypsinogen OS=Homo sapiens GN=TRY8 PE=1 SV=1;;tr|A0A0J9	13	1	1	1	1	1	1	1	1	1	1	1	1	1	1	1	1	1	1	1	1	1	1	1	1	1	1	1	1	1	1	1	1	1	1	1	1	1	1	1	14.1	14.1
A0A087WWP4;Q96T37	A0A087WWP4;Q96T37	3;3	3;3	3;3	Putative RNA-binding protein 15	RBM15	tr|A0A087WWP4|A0A087WWP4_HUMAN Putative RNA-binding protein 15 OS=Homo sapiens GN=RBM15 PE=1 SV=1;sp|Q96T37|RBM15_HUMAN Putative RNA-binding protein 15 OS=Homo sapiens GN=RBM15 PE=1 SV=2	2	3	3	3	3	1	2	2	3	3	2	2	1	1	1	2	3	1	2	2	3	3	2	2	1	1	1	2	3	1	2	2	3	3	2	2	1	1	1	2	4.5	4.5
I3L2Z5;A0A087WWR2;P56270;H3BQI4;I3L411;H3BPU3;I3L4Y2;I3L0M3;H3BQS2	I3L2Z5;A0A087WWR2;P56270;H3BQI4	3;3;3;2;1;1;1;1;1	3;3;3;2;1;1;1;1;1	3;3;3;2;1;1;1;1;1	Myc-associated zinc finger protein	MAZ	tr|I3L2Z5|I3L2Z5_HUMAN Myc-associated zinc finger protein (Fragment) OS=Homo sapiens GN=MAZ PE=1 SV=1;tr|A0A087WWR2|A0A087WWR2_HUMAN Myc-associated zinc finger protein OS=Homo sapiens GN=MAZ PE=1 SV=1;sp|P56270|MAZ_HUMAN Myc-associated zinc finger protein	9	3	3	3	3	3	3	3	2	3	3	3	3	3	3	3	3	3	3	3	2	3	3	3	3	3	3	3	3	3	3	3	2	3	3	3	3	3	3	3	22.3	22.3
A0A087WWU8;D6R904;K7EP68;D6RFM2;H0YL80;H0YNC7	A0A087WWU8	20;9;5;4;4;4	1;1;1;0;1;1	0;0;0;0;0;0		TPM3	tr|A0A087WWU8|A0A087WWU8_HUMAN Tropomyosin alpha-3 chain OS=Homo sapiens GN=TPM3 PE=1 SV=1	6	20	1	0	17	17	19	19	16	18	16	19	16	17	18	17	1	1	1	1	1	1	1	1	1	1	1	1	0	0	0	0	0	0	0	0	0	0	0	0	65.2	5.7
A0A087WYV3;E7EPF0;A0A0D9SEW3;A0A087WXF8;Q9NP64;A0A087WXU5	A0A087WYV3;E7EPF0;A0A0D9SEW3;A0A087WXF8;Q9NP64;A0A087WXU5	2;2;2;2;2;1	2;2;2;2;2;1	2;2;2;2;2;1	Nucleolar protein of 40 kDa	ZCCHC17	tr|A0A087WYV3|A0A087WYV3_HUMAN Nucleolar protein of 40 kDa OS=Homo sapiens GN=ZCCHC17 PE=1 SV=1;tr|E7EPF0|E7EPF0_HUMAN Nucleolar protein of 40 kDa OS=Homo sapiens GN=ZCCHC17 PE=1 SV=2;tr|A0A0D9SEW3|A0A0D9SEW3_HUMAN Nucleolar protein of 40 kDa OS=Homo sapie	6	2	2	2	0	0	0	0	1	0	0	2	1	0	1	1	0	0	0	0	1	0	0	2	1	0	1	1	0	0	0	0	1	0	0	2	1	0	1	1	13.4	13.4
A0A087WXM6;J3QQT2;J3KRX5;A0A0A6YYL6;P18621;J3KRB3;A0A087WWH0;J3QS96;J3QLC8;A0A0A0MRF8;A0A087WY81;J3KSJ0	A0A087WXM6;J3QQT2;J3KRX5;A0A0A6YYL6;P18621;J3KRB3;A0A087WWH0;J3QS96;J3QLC8;A0A0A0MRF8;A0A087WY81	5;5;5;5;5;4;4;4;4;4;3;1	5;5;5;5;5;4;4;4;4;4;3;1	5;5;5;5;5;4;4;4;4;4;3;1	60S ribosomal protein L17	RPL17;RPL17-C18orf32	tr|A0A087WXM6|A0A087WXM6_HUMAN 60S ribosomal protein L17 (Fragment) OS=Homo sapiens GN=RPL17 PE=3 SV=1;tr|J3QQT2|J3QQT2_HUMAN 60S ribosomal protein L17 (Fragment) OS=Homo sapiens GN=RPL17 PE=3 SV=1;tr|J3KRX5|J3KRX5_HUMAN 60S ribosomal protein L17 (Fragment	12	5	5	5	4	3	4	3	5	4	4	4	4	3	4	4	4	3	4	3	5	4	4	4	4	3	4	4	4	3	4	3	5	4	4	4	4	3	4	4	34.3	34.3
A0A087WXZ8;Q8N9Q2	A0A087WXZ8;Q8N9Q2	2;2	2;2	2;2	Protein SREK1IP1	SREK1IP1	tr|A0A087WXZ8|A0A087WXZ8_HUMAN Protein SREK1IP1 OS=Homo sapiens GN=SREK1IP1 PE=1 SV=1;sp|Q8N9Q2|SR1IP_HUMAN Protein SREK1IP1 OS=Homo sapiens GN=SREK1IP1 PE=1 SV=1	2	2	2	2	2	2	1	2	2	1	2	2	2	2	1	1	2	2	1	2	2	1	2	2	2	2	1	1	2	2	1	2	2	1	2	2	2	2	1	1	19.4	19.4
A0A087WY03;E5RFV3	A0A087WY03;E5RFV3	3;3	3;3	3;3		SREK1	tr|A0A087WY03|A0A087WY03_HUMAN Splicing regulatory glutamine/lysine-rich protein 1 OS=Homo sapiens GN=SREK1 PE=1 SV=1;tr|E5RFV3|E5RFV3_HUMAN Splicing regulatory glutamine/lysine-rich protein 1 OS=Homo sapiens GN=SREK1 PE=1 SV=1	2	3	3	3	2	1	1	1	3	2	3	3	2	2	1	3	2	1	1	1	3	2	3	3	2	2	1	3	2	1	1	1	3	2	3	3	2	2	1	3	35	35
A0A087WYS6;O14818;Q8TAA3	A0A087WYS6;O14818;Q8TAA3	1;1;1	1;1;1	1;1;1	Proteasome subunit alpha type-7;Proteasome subunit alpha type-7-like	PSMA8;PSMA7	tr|A0A087WYS6|A0A087WYS6_HUMAN Proteasome (Prosome, macropain) subunit, alpha type, 8, isoform CRA_b OS=Homo sapiens GN=PSMA8 PE=1 SV=1;sp|O14818|PSA7_HUMAN Proteasome subunit alpha type-7 OS=Homo sapiens GN=PSMA7 PE=1 SV=1;sp|Q8TAA3|PSA7L_HUMAN Proteasome	3	1	1	1	1	1	0	1	1	0	0	0	1	1	1	1	1	1	0	1	1	0	0	0	1	1	1	1	1	1	0	1	1	0	0	0	1	1	1	1	4.9	4.9
A0A087WYT3;Q15185;B4DDC6	A0A087WYT3;Q15185;B4DDC6	7;7;4	7;7;4	7;7;4	Prostaglandin E synthase 3	PTGES3	tr|A0A087WYT3|A0A087WYT3_HUMAN Prostaglandin E synthase 3 OS=Homo sapiens GN=PTGES3 PE=1 SV=1;sp|Q15185|TEBP_HUMAN Prostaglandin E synthase 3 OS=Homo sapiens GN=PTGES3 PE=1 SV=1;tr|B4DDC6|B4DDC6_HUMAN Prostaglandin E synthase 3 OS=Homo sapiens GN=PTGES3 PE	3	7	7	7	6	5	6	6	6	6	7	7	7	7	7	7	6	5	6	6	6	6	7	7	7	7	7	7	6	5	6	6	6	6	7	7	7	7	7	7	40.9	40.9
A0A087WYW3;P30414	A0A087WYW3;P30414	3;3	3;3	3;3	NK-tumor recognition protein;Putative peptidyl-prolyl cis-trans isomerase	NKTR	tr|A0A087WYW3|A0A087WYW3_HUMAN NK-tumor recognition protein OS=Homo sapiens GN=NKTR PE=1 SV=1;sp|P30414|NKTR_HUMAN NK-tumor recognition protein OS=Homo sapiens GN=NKTR PE=1 SV=2	2	3	3	3	1	1	1	1	1	1	2	3	3	1	2	0	1	1	1	1	1	1	2	3	3	1	2	0	1	1	1	1	1	1	2	3	3	1	2	0	3.9	3.9
A0A087WZ40;Q14244	A0A087WZ40;Q14244	2;2	2;2	2;2	Ensconsin	MAP7	tr|A0A087WZ40|A0A087WZ40_HUMAN Ensconsin OS=Homo sapiens GN=MAP7 PE=1 SV=1;sp|Q14244|MAP7_HUMAN Ensconsin OS=Homo sapiens GN=MAP7 PE=1 SV=1	2	2	2	2	0	0	1	1	1	1	0	0	1	1	1	2	0	0	1	1	1	1	0	0	1	1	1	2	0	0	1	1	1	1	0	0	1	1	1	2	2.8	2.8
A0A087WZH7;P29966	A0A087WZH7;P29966	3;3	3;3	3;3	Myristoylated alanine-rich C-kinase substrate	MARCKS	tr|A0A087WZH7|A0A087WZH7_HUMAN Myristoylated alanine-rich C-kinase substrate OS=Homo sapiens GN=MARCKS PE=1 SV=1;sp|P29966|MARCS_HUMAN Myristoylated alanine-rich C-kinase substrate OS=Homo sapiens GN=MARCKS PE=1 SV=4	2	3	3	3	3	2	3	3	3	2	3	3	3	3	3	2	3	2	3	3	3	2	3	3	3	3	3	2	3	2	3	3	3	2	3	3	3	3	3	2	20.9	20.9
H3BV85;H3BTW0;A0A0B4J295;A0A087WZT3;H3BVE0;Q9H3K6	H3BV85;H3BTW0;A0A0B4J295;A0A087WZT3;H3BVE0;Q9H3K6	1;1;1;1;1;1	1;1;1;1;1;1	1;1;1;1;1;1	BolA-like protein 2	BOLA2B;BOLA2	tr|H3BV85|H3BV85_HUMAN BolA-like protein 2 (Fragment) OS=Homo sapiens GN=BOLA2B PE=1 SV=1;tr|H3BTW0|H3BTW0_HUMAN Uncharacterized protein (Fragment) OS=Homo sapiens PE=3 SV=1;tr|A0A0B4J295|A0A0B4J295_HUMAN Uncharacterized protein OS=Homo sapiens PE=3 SV=1;t	6	1	1	1	1	0	0	1	1	1	1	0	1	0	0	0	1	0	0	1	1	1	1	0	1	0	0	0	1	0	0	1	1	1	1	0	1	0	0	0	18.2	18.2
D6R9P3;D6RD18;D6RBZ0;A0A087WZV1;Q99729	D6R9P3;D6RD18;D6RBZ0;A0A087WZV1;Q99729	2;2;2;2;1	2;2;2;2;1	2;2;2;2;1	Heterogeneous nuclear ribonucleoprotein A/B	HNRNPAB	tr|D6R9P3|D6R9P3_HUMAN Heterogeneous nuclear ribonucleoprotein A/B OS=Homo sapiens GN=HNRNPAB PE=1 SV=1;tr|D6RD18|D6RD18_HUMAN Heterogeneous nuclear ribonucleoprotein A/B OS=Homo sapiens GN=HNRNPAB PE=1 SV=1;tr|D6RBZ0|D6RBZ0_HUMAN Heterogeneous nuclear rib	5	2	2	2	2	2	2	2	2	2	2	2	2	2	2	2	2	2	2	2	2	2	2	2	2	2	2	2	2	2	2	2	2	2	2	2	2	2	2	2	9.6	9.6
A0A087WZZ5;Q13435;E9PPJ0;E9PJT3;H0YEX5;E9PJ04;H0YCG1;E9PIL8	A0A087WZZ5;Q13435;E9PPJ0	12;12;11;4;4;4;4;1	12;12;11;4;4;4;4;1	12;12;11;4;4;4;4;1	Splicing factor 3B subunit 2	SF3B2	tr|A0A087WZZ5|A0A087WZZ5_HUMAN Splicing factor 3B subunit 2 OS=Homo sapiens GN=SF3B2 PE=1 SV=1;sp|Q13435|SF3B2_HUMAN Splicing factor 3B subunit 2 OS=Homo sapiens GN=SF3B2 PE=1 SV=2;tr|E9PPJ0|E9PPJ0_HUMAN Splicing factor 3B subunit 2 OS=Homo sapiens GN=SF3B	8	12	12	12	11	10	8	6	8	9	8	8	4	8	6	9	11	10	8	6	8	9	8	8	4	8	6	9	11	10	8	6	8	9	8	8	4	8	6	9	16.1	16.1
A0A087X020;Q9Y3A5;F8WE72	A0A087X020;Q9Y3A5	6;6;2	6;6;2	6;6;2	Ribosome maturation protein SBDS	SBDS	tr|A0A087X020|A0A087X020_HUMAN Ribosome maturation protein SBDS OS=Homo sapiens GN=SBDS PE=1 SV=1;sp|Q9Y3A5|SBDS_HUMAN Ribosome maturation protein SBDS OS=Homo sapiens GN=SBDS PE=1 SV=4	3	6	6	6	4	5	5	3	4	4	4	4	5	4	6	4	4	5	5	3	4	4	4	4	5	4	6	4	4	5	5	3	4	4	4	4	5	4	6	4	25.2	25.2
A0A087X0E3;A0A0A0MS59;A0A0C4DFX4;Q6ZRS2	A0A087X0E3;A0A0A0MS59;A0A0C4DFX4;Q6ZRS2	2;2;2;2	2;2;2;2	2;2;2;2	Helicase SRCAP	SRCAP	tr|A0A087X0E3|A0A087X0E3_HUMAN Helicase SRCAP (Fragment) OS=Homo sapiens GN=SRCAP PE=1 SV=1;tr|A0A0A0MS59|A0A0A0MS59_HUMAN Helicase SRCAP OS=Homo sapiens GN=SRCAP PE=1 SV=1;tr|A0A0C4DFX4|A0A0C4DFX4_HUMAN Uncharacterized protein (Fragment) OS=Homo sapiens P	4	2	2	2	1	2	2	1	2	1	1	1	1	1	1	1	1	2	2	1	2	1	1	1	1	1	1	1	1	2	2	1	2	1	1	1	1	1	1	1	1.2	1.2
A0A087X0K9;G5E9E7;G3V1L9;Q07157;H0YKB1	A0A087X0K9;G5E9E7;G3V1L9;Q07157	5;5;5;5;2	5;5;5;5;2	5;5;5;5;2	Tight junction protein ZO-1	TJP1	tr|A0A087X0K9|A0A087X0K9_HUMAN Tight junction protein ZO-1 OS=Homo sapiens GN=TJP1 PE=1 SV=1;tr|G5E9E7|G5E9E7_HUMAN Tight junction protein 1 (Zona occludens 1), isoform CRA_e OS=Homo sapiens GN=TJP1 PE=1 SV=1;tr|G3V1L9|G3V1L9_HUMAN Tight junction protein 1	5	5	5	5	2	1	4	4	3	5	2	3	3	2	2	1	2	1	4	4	3	5	2	3	3	2	2	1	2	1	4	4	3	5	2	3	3	2	2	1	3.9	3.9
A0A087X0X3;P52272;M0R019;M0R2T0;M0R0Y6;M0QYQ7;M0R0N3;M0QY96;M0R2I7;M0QZM1	A0A087X0X3;P52272;M0R019;M0R2T0	7;7;5;4;3;3;3;2;2;1	7;7;5;4;3;3;3;2;2;1	7;7;5;4;3;3;3;2;2;1	Heterogeneous nuclear ribonucleoprotein M	HNRNPM	tr|A0A087X0X3|A0A087X0X3_HUMAN Heterogeneous nuclear ribonucleoprotein M OS=Homo sapiens GN=HNRNPM PE=1 SV=1;sp|P52272|HNRPM_HUMAN Heterogeneous nuclear ribonucleoprotein M OS=Homo sapiens GN=HNRNPM PE=1 SV=3;tr|M0R019|M0R019_HUMAN Heterogeneous nuclear ri	10	7	7	7	4	3	4	2	1	1	5	4	3	4	2	2	4	3	4	2	1	1	5	4	3	4	2	2	4	3	4	2	1	1	5	4	3	4	2	2	13.6	13.6
A0A087X295;Q9NNW5;E9PDU5;E9PBK6;Q6PKC6;E5RFX3;F8WE36;C9K020	A0A087X295;Q9NNW5;E9PDU5;E9PBK6	9;9;8;6;3;1;1;1	9;9;8;6;3;1;1;1	9;9;8;6;3;1;1;1	WD repeat-containing protein 6	WDR6	tr|A0A087X295|A0A087X295_HUMAN WD repeat-containing protein 6 OS=Homo sapiens GN=WDR6 PE=1 SV=1;sp|Q9NNW5|WDR6_HUMAN WD repeat-containing protein 6 OS=Homo sapiens GN=WDR6 PE=1 SV=1;tr|E9PDU5|E9PDU5_HUMAN WD repeat-containing protein 6 OS=Homo sapiens GN=W	8	9	9	9	5	5	8	6	6	4	6	4	7	5	7	8	5	5	8	6	6	4	6	4	7	5	7	8	5	5	8	6	6	4	6	4	7	5	7	8	10.7	10.7
F1T0B3;A0A087X2G1;Q92499	F1T0B3;A0A087X2G1;Q92499	3;3;3	3;3;3	3;3;3	ATP-dependent RNA helicase DDX1	DDX1	tr|F1T0B3|F1T0B3_HUMAN ATP-dependent RNA helicase DDX1 OS=Homo sapiens GN=DDX1 PE=1 SV=1;tr|A0A087X2G1|A0A087X2G1_HUMAN ATP-dependent RNA helicase DDX1 OS=Homo sapiens GN=DDX1 PE=1 SV=1;sp|Q92499|DDX1_HUMAN ATP-dependent RNA helicase DDX1 OS=Homo sapiens G	3	3	3	3	0	1	2	3	3	2	3	3	3	3	2	2	0	1	2	3	3	2	3	3	3	3	2	2	0	1	2	3	3	2	3	3	3	3	2	2	5.2	5.2
A0A096LPH6;Q14966	A0A096LPH6;Q14966	3;3	3;3	3;3	Zinc finger protein 638	ZNF638	tr|A0A096LPH6|A0A096LPH6_HUMAN Zinc finger protein 638 OS=Homo sapiens GN=ZNF638 PE=1 SV=1;sp|Q14966|ZN638_HUMAN Zinc finger protein 638 OS=Homo sapiens GN=ZNF638 PE=1 SV=2	2	3	3	3	1	0	0	2	1	0	2	2	2	2	1	2	1	0	0	2	1	0	2	2	2	2	1	2	1	0	0	2	1	0	2	2	2	2	1	2	5.1	5.1
F5H0Q6;A0A0A0MQS2;Q8N2M8;K7EM61;K7EKC9;K7EP11	F5H0Q6;A0A0A0MQS2;Q8N2M8	14;14;13;5;3;1	14;14;13;5;3;1	14;14;13;5;3;1	CLK4-associating serine/arginine rich protein	CLASRP	tr|F5H0Q6|F5H0Q6_HUMAN CLK4-associating serine/arginine-rich protein OS=Homo sapiens GN=CLASRP PE=1 SV=2;tr|A0A0A0MQS2|A0A0A0MQS2_HUMAN CLK4-associating serine/arginine-rich protein OS=Homo sapiens GN=CLASRP PE=1 SV=1;sp|Q8N2M8|CLASR_HUMAN CLK4-associating	6	14	14	14	11	12	11	12	12	11	14	11	12	12	13	13	11	12	11	12	12	11	14	11	12	12	13	13	11	12	11	12	12	11	14	11	12	12	13	13	29.5	29.5
A0A0A0MQV9;Q9UPS6	A0A0A0MQV9;Q9UPS6	4;4	3;3	3;3	Histone-lysine N-methyltransferase;Histone-lysine N-methyltransferase SETD1B	SETD1B	tr|A0A0A0MQV9|A0A0A0MQV9_HUMAN Histone-lysine N-methyltransferase SETD1B OS=Homo sapiens GN=SETD1B PE=1 SV=1;sp|Q9UPS6|SET1B_HUMAN Histone-lysine N-methyltransferase SETD1B OS=Homo sapiens GN=SETD1B PE=1 SV=3	2	4	3	3	3	3	3	4	3	4	3	3	3	3	3	4	2	2	2	3	2	3	2	2	2	2	2	3	2	2	2	3	2	3	2	2	2	2	2	3	3.1	2.5
A0A0A0MR52;E7EX73;E9PGM1;E7EUU4;Q04637;H7C044;C9J6B6;C9J2Z7;C9K073;C9JF13;H7C0V6	A0A0A0MR52;E7EX73;E9PGM1;E7EUU4;Q04637	6;6;6;6;6;2;2;2;2;2;1	6;6;6;6;6;2;2;2;2;2;1	6;6;6;6;6;2;2;2;2;2;1	Eukaryotic translation initiation factor 4 gamma 1	EIF4G1	tr|A0A0A0MR52|A0A0A0MR52_HUMAN Eukaryotic translation initiation factor 4 gamma 1 OS=Homo sapiens GN=EIF4G1 PE=1 SV=1;tr|E7EX73|E7EX73_HUMAN Eukaryotic translation initiation factor 4 gamma 1 OS=Homo sapiens GN=EIF4G1 PE=1 SV=1;tr|E9PGM1|E9PGM1_HUMAN Eukar	11	6	6	6	4	4	3	2	2	2	3	4	4	3	3	5	4	4	3	2	2	2	3	4	4	3	3	5	4	4	3	2	2	2	3	4	4	3	3	5	6.1	6.1
A0A0A0MRI1;Q8IXQ4;A0A087WW86	A0A0A0MRI1;Q8IXQ4	7;7;1	7;7;1	7;7;1	GPALPP motifs-containing protein 1	GPALPP1	tr|A0A0A0MRI1|A0A0A0MRI1_HUMAN GPALPP motifs-containing protein 1 OS=Homo sapiens GN=GPALPP1 PE=1 SV=1;sp|Q8IXQ4|GPAM1_HUMAN GPALPP motifs-containing protein 1 OS=Homo sapiens GN=GPALPP1 PE=1 SV=1	3	7	7	7	6	6	6	5	7	7	4	6	5	7	5	4	6	6	6	5	7	7	4	6	5	7	5	4	6	6	6	5	7	7	4	6	5	7	5	4	23.1	23.1
A0A0A0MRI2;Q9UNH7;G3V5X9;Q86XE0	A0A0A0MRI2;Q9UNH7;G3V5X9	6;6;4;1	5;5;3;1	5;5;3;1	Sorting nexin-6;Sorting nexin-6, N-terminally processed	SNX6	tr|A0A0A0MRI2|A0A0A0MRI2_HUMAN Sorting nexin 6, isoform CRA_b OS=Homo sapiens GN=SNX6 PE=1 SV=1;sp|Q9UNH7|SNX6_HUMAN Sorting nexin-6 OS=Homo sapiens GN=SNX6 PE=1 SV=1;tr|G3V5X9|G3V5X9_HUMAN Sorting nexin-6 (Fragment) OS=Homo sapiens GN=SNX6 PE=1 SV=1	4	6	5	5	4	5	4	6	5	5	4	5	4	4	4	5	4	4	4	5	5	5	4	5	4	4	4	5	4	4	4	5	5	5	4	5	4	4	4	5	16.7	14.4
A0A0A0MRL6;H0Y7N6;F6XFR5;J3QSX6;F8W8M4;O14639	A0A0A0MRL6;H0Y7N6;F6XFR5;J3QSX6;F8W8M4;O14639	2;1;1;1;1;1	2;1;1;1;1;1	2;1;1;1;1;1	Actin-binding LIM protein 1	ABLIM1	tr|A0A0A0MRL6|A0A0A0MRL6_HUMAN Actin-binding LIM protein 1 OS=Homo sapiens GN=ABLIM1 PE=1 SV=1;tr|H0Y7N6|H0Y7N6_HUMAN Actin-binding LIM protein 1 (Fragment) OS=Homo sapiens GN=ABLIM1 PE=1 SV=1;tr|F6XFR5|F6XFR5_HUMAN Actin-binding LIM protein 1 (Fragment) O	6	2	2	2	0	0	0	0	0	0	0	0	2	0	0	0	0	0	0	0	0	0	0	0	2	0	0	0	0	0	0	0	0	0	0	0	2	0	0	0	3.4	3.4
A0A0A0MRM8;A0A0D9SGC1;E7EW20;Q9UM54	A0A0A0MRM8;A0A0D9SGC1;E7EW20;Q9UM54	2;1;1;1	2;1;1;1	2;1;1;1	Unconventional myosin-VI	MYO6	tr|A0A0A0MRM8|A0A0A0MRM8_HUMAN Unconventional myosin-VI OS=Homo sapiens GN=MYO6 PE=1 SV=1;tr|A0A0D9SGC1|A0A0D9SGC1_HUMAN Unconventional myosin-VI OS=Homo sapiens GN=MYO6 PE=1 SV=1;tr|E7EW20|E7EW20_HUMAN Unconventional myosin-VI OS=Homo sapiens GN=MYO6 PE=1	4	2	2	2	1	0	1	0	1	0	2	2	1	1	1	1	1	0	1	0	1	0	2	2	1	1	1	1	1	0	1	0	1	0	2	2	1	1	1	1	2.4	2.4
A0A0A0MRM9;Q14978;S4R349;S4R3C2;S4R402;S4R341	A0A0A0MRM9;Q14978	29;27;10;5;2;2	29;27;10;5;2;2	29;27;10;5;2;2	Nucleolar and coiled-body phosphoprotein 1	NOLC1	tr|A0A0A0MRM9|A0A0A0MRM9_HUMAN Nucleolar and coiled-body phosphoprotein 1 (Fragment) OS=Homo sapiens GN=NOLC1 PE=1 SV=1;sp|Q14978|NOLC1_HUMAN Nucleolar and coiled-body phosphoprotein 1 OS=Homo sapiens GN=NOLC1 PE=1 SV=2	6	29	29	29	28	27	29	29	29	29	29	29	28	27	27	26	28	27	29	29	29	29	29	29	28	27	27	26	28	27	29	29	29	29	29	29	28	27	27	26	30.2	30.2
A0A0A0MRP0;Q8IWC1	A0A0A0MRP0;Q8IWC1	2;2	2;2	2;2	MAP7 domain-containing protein 3	MAP7D3	tr|A0A0A0MRP0|A0A0A0MRP0_HUMAN MAP7 domain-containing protein 3 (Fragment) OS=Homo sapiens GN=MAP7D3 PE=1 SV=1;sp|Q8IWC1|MA7D3_HUMAN MAP7 domain-containing protein 3 OS=Homo sapiens GN=MAP7D3 PE=1 SV=2	2	2	2	2	1	1	1	2	2	0	0	1	0	2	2	2	1	1	1	2	2	0	0	1	0	2	2	2	1	1	1	2	2	0	0	1	0	2	2	2	2.6	2.6
A0A0A0MRR7;P09234	A0A0A0MRR7;P09234	2;2	2;2	2;2	U1 small nuclear ribonucleoprotein C	SNRPC	tr|A0A0A0MRR7|A0A0A0MRR7_HUMAN U1 small nuclear ribonucleoprotein C OS=Homo sapiens GN=SNRPC PE=1 SV=1;sp|P09234|RU1C_HUMAN U1 small nuclear ribonucleoprotein C OS=Homo sapiens GN=SNRPC PE=1 SV=1	2	2	2	2	2	2	2	2	2	1	2	2	2	2	1	1	2	2	2	2	2	1	2	2	2	2	1	1	2	2	2	2	2	1	2	2	2	2	1	1	16.7	16.7
A0A0A0MSQ0;P13797;U3KQI3;Q5TBN3;P13796	A0A0A0MSQ0;P13797;U3KQI3	5;5;3;1;1	5;5;3;1;1	5;5;3;1;1	Plastin-3	PLS3	tr|A0A0A0MSQ0|A0A0A0MSQ0_HUMAN Plastin-3 OS=Homo sapiens GN=PLS3 PE=1 SV=1;sp|P13797|PLST_HUMAN Plastin-3 OS=Homo sapiens GN=PLS3 PE=1 SV=4;tr|U3KQI3|U3KQI3_HUMAN Plastin-3 (Fragment) OS=Homo sapiens GN=PLS3 PE=1 SV=1	5	5	5	5	2	4	3	2	3	3	4	4	4	3	4	5	2	4	3	2	3	3	4	4	4	3	4	5	2	4	3	2	3	3	4	4	4	3	4	5	11.5	11.5
J3KR24;A0A0A0MSX9;P41252	J3KR24;A0A0A0MSX9;P41252	2;2;2	2;2;2	2;2;2	Isoleucine--tRNA ligase, cytoplasmic	IARS	tr|J3KR24|J3KR24_HUMAN Isoleucine--tRNA ligase, cytoplasmic OS=Homo sapiens GN=IARS PE=1 SV=1;tr|A0A0A0MSX9|A0A0A0MSX9_HUMAN Isoleucine--tRNA ligase, cytoplasmic OS=Homo sapiens GN=IARS PE=1 SV=1;sp|P41252|SYIC_HUMAN Isoleucine--tRNA ligase, cytoplasmic OS	3	2	2	2	1	0	0	0	0	0	0	0	0	0	1	0	1	0	0	0	0	0	0	0	0	0	1	0	1	0	0	0	0	0	0	0	0	0	1	0	2.4	2.4
A0A0A0MT33;Q9UPN6	A0A0A0MT33;Q9UPN6	15;15	15;15	12;12	Protein SCAF8	SCAF8	tr|A0A0A0MT33|A0A0A0MT33_HUMAN Protein SCAF8 OS=Homo sapiens GN=SCAF8 PE=1 SV=1;sp|Q9UPN6|SCAF8_HUMAN Protein SCAF8 OS=Homo sapiens GN=SCAF8 PE=1 SV=1	2	15	15	12	12	9	12	11	11	11	9	11	11	9	11	10	12	9	12	11	11	11	9	11	11	9	11	10	9	6	9	8	8	8	6	8	9	6	9	7	13.9	13.9
Q9HBD4;A0A0A0MT49;P51532;P51531;A0A0U1RRF5;K7EP28;A0A0U1RRD6;A0A0U1RRF8;A0A0A0MSS5;F6UH26;A0A0U1RQU0;A0A0U1RR09;F6XE55;A0A0U1RQW7;A0A0U1RRN2;B1ALG1;A0A0U1RR83;A0A0U1RQX3;F6T8Q0;B1ALG2;A0A0U1RR26;A0A0U1RRG6;B4DNT1;B1ALF6;A0A0U1RQZ9;F6VDE0	Q9HBD4;A0A0A0MT49;P51532;P51531	3;3;3;2;1;1;1;1;1;1;1;1;1;1;1;1;1;1;1;1;1;1;1;1;1;1	3;3;3;2;1;1;1;1;1;1;1;1;1;1;1;1;1;1;1;1;1;1;1;1;1;1	3;3;3;2;1;1;1;1;1;1;1;1;1;1;1;1;1;1;1;1;1;1;1;1;1;1	Transcription activator BRG1;Probable global transcription activator SNF2L2	SMARCA4;SMARCA2	tr|Q9HBD4|Q9HBD4_HUMAN SMARCA4 isoform 2 OS=Homo sapiens GN=SMARCA4 PE=1 SV=1;tr|A0A0A0MT49|A0A0A0MT49_HUMAN Transcription activator BRG1 OS=Homo sapiens GN=SMARCA4 PE=1 SV=1;sp|P51532|SMCA4_HUMAN Transcription activator BRG1 OS=Homo sapiens GN=SMARCA4 PE=	26	3	3	3	2	0	2	1	3	1	1	2	1	3	1	1	2	0	2	1	3	1	1	2	1	3	1	1	2	0	2	1	3	1	1	2	1	3	1	1	2.3	2.3
E5RJN7;A0A0A0MTC4;A0A0A0MTD1;F8VPI7;E7EPX0;A0A0A0MTC6;E7EVJ4;E9PH62;A0A0A0MTC5;Q9NUL3;E7EVI1;G5EA18;E5RJ67;H0YBY0;E5RFK1;A0A087X1A5;Q5JW30;O95793	E5RJN7;A0A0A0MTC4;A0A0A0MTD1;F8VPI7;E7EPX0;A0A0A0MTC6;E7EVJ4;E9PH62;A0A0A0MTC5;Q9NUL3;E7EVI1;G5EA18;E5RJ67	8;8;8;8;8;8;8;8;8;8;7;6;4;1;1;1;1;1	8;8;8;8;8;8;8;8;8;8;7;6;4;1;1;1;1;1	8;8;8;8;8;8;8;8;8;8;7;6;4;1;1;1;1;1	Double-stranded RNA-binding protein Staufen homolog 2	STAU2	tr|E5RJN7|E5RJN7_HUMAN Double-stranded RNA-binding protein Staufen homolog 2 (Fragment) OS=Homo sapiens GN=STAU2 PE=1 SV=1;tr|A0A0A0MTC4|A0A0A0MTC4_HUMAN Double-stranded RNA-binding protein Staufen homolog 2 OS=Homo sapiens GN=STAU2 PE=1 SV=1;tr|A0A0A0MTD1	18	8	8	8	5	4	4	5	6	5	6	7	5	7	5	6	5	4	4	5	6	5	6	7	5	7	5	6	5	4	4	5	6	5	6	7	5	7	5	6	29.1	29.1
A0A0A0MTH3;Q13418	A0A0A0MTH3;Q13418	2;2	2;2	2;2	Integrin-linked protein kinase	ILK	tr|A0A0A0MTH3|A0A0A0MTH3_HUMAN Integrin-linked protein kinase OS=Homo sapiens GN=ILK PE=1 SV=1;sp|Q13418|ILK_HUMAN Integrin-linked protein kinase OS=Homo sapiens GN=ILK PE=1 SV=2	2	2	2	2	1	0	1	0	0	0	0	0	0	0	1	1	1	0	1	0	0	0	0	0	0	0	1	1	1	0	1	0	0	0	0	0	0	0	1	1	5	5
B8ZWD1;A0A0A0MTI5;P07108	B8ZWD1;A0A0A0MTI5;P07108	2;2;2	2;2;2	2;2;2	Acyl-CoA-binding protein	DBI	tr|B8ZWD1|B8ZWD1_HUMAN Acyl-CoA-binding protein OS=Homo sapiens GN=DBI PE=1 SV=1;tr|A0A0A0MTI5|A0A0A0MTI5_HUMAN Acyl-CoA-binding protein OS=Homo sapiens GN=DBI PE=1 SV=1;sp|P07108|ACBP_HUMAN Acyl-CoA-binding protein OS=Homo sapiens GN=DBI PE=1 SV=2	3	2	2	2	1	0	1	0	1	2	2	0	1	1	1	1	1	0	1	0	1	2	2	0	1	1	1	1	1	0	1	0	1	2	2	0	1	1	1	1	37.1	37.1
A0A0A0MTS2;P06744;A0A0J9YXP8;A0A0J9YX90;A0A0J9YYH3;K7EQ48;CON__Q3ZBD7;K7ENA0;K7EPY4	A0A0A0MTS2;P06744;A0A0J9YXP8;A0A0J9YX90;A0A0J9YYH3;K7EQ48	5;5;4;4;4;4;2;1;1	5;5;4;4;4;4;2;1;1	5;5;4;4;4;4;2;1;1	Glucose-6-phosphate isomerase	GPI	tr|A0A0A0MTS2|A0A0A0MTS2_HUMAN Glucose-6-phosphate isomerase (Fragment) OS=Homo sapiens GN=GPI PE=1 SV=1;sp|P06744|G6PI_HUMAN Glucose-6-phosphate isomerase OS=Homo sapiens GN=GPI PE=1 SV=4;tr|A0A0J9YXP8|A0A0J9YXP8_HUMAN Glucose-6-phosphate isomerase (Fragm	9	5	5	5	4	3	4	2	3	3	5	4	5	5	5	4	4	3	4	2	3	3	5	4	5	5	5	4	4	3	4	2	3	3	5	4	5	5	5	4	12.6	12.6
A0A0B4J220;E9PLD3;E9PRG8	A0A0B4J220	5;2;2	5;2;2	5;2;2		C11orf98	tr|A0A0B4J220|A0A0B4J220_HUMAN Chromosome 11 open reading frame 48, isoform CRA_c OS=Homo sapiens GN=C11orf98 PE=1 SV=1	3	5	5	5	3	2	4	2	3	4	3	3	3	3	3	3	3	2	4	2	3	4	3	3	3	3	3	3	3	2	4	2	3	4	3	3	3	3	3	3	34.1	34.1
F5H895;A0A0B4J239;F5GXX5;P61803	F5H895;A0A0B4J239;F5GXX5;P61803	1;1;1;1	1;1;1;1	1;1;1;1	Dolichyl-diphosphooligosaccharide--protein glycosyltransferase subunit DAD1	DAD1	tr|F5H895|F5H895_HUMAN Dolichyl-diphosphooligosaccharide--protein glycosyltransferase subunit DAD1 OS=Homo sapiens GN=DAD1 PE=1 SV=1;tr|A0A0B4J239|A0A0B4J239_HUMAN Dolichyl-diphosphooligosaccharide--protein glycosyltransferase subunit DAD1 OS=Homo sapiens	4	1	1	1	0	0	0	0	0	1	1	1	1	1	1	0	0	0	0	0	0	1	1	1	1	1	1	0	0	0	0	0	0	1	1	1	1	1	1	0	18.5	18.5
S4R456;K7EM56;A0A0B4J2B4;K7EJ78;S4R417;K7EQJ5;K7ELC2;P62841	S4R456;K7EM56;A0A0B4J2B4;K7EJ78;S4R417;K7EQJ5;K7ELC2;P62841	1;1;1;1;1;1;1;1	1;1;1;1;1;1;1;1	1;1;1;1;1;1;1;1	40S ribosomal protein S15	RPS15	tr|S4R456|S4R456_HUMAN 40S ribosomal protein S15 (Fragment) OS=Homo sapiens GN=RPS15 PE=1 SV=1;tr|K7EM56|K7EM56_HUMAN 40S ribosomal protein S15 OS=Homo sapiens GN=RPS15 PE=1 SV=2;tr|A0A0B4J2B4|A0A0B4J2B4_HUMAN 40S ribosomal protein S15 OS=Homo sapiens GN=R	8	1	1	1	1	1	1	1	1	1	1	1	1	1	1	1	1	1	1	1	1	1	1	1	1	1	1	1	1	1	1	1	1	1	1	1	1	1	1	1	17.6	17.6
Q5W0H4;A0A0B4J2C3;P13693;J3KPG2;E9PJF7;H0YCX0;Q56UQ5	Q5W0H4;A0A0B4J2C3;P13693;J3KPG2;E9PJF7	6;6;6;5;4;2;2	6;6;6;5;4;2;2	6;6;6;5;4;2;2	Translationally-controlled tumor protein	TPT1	tr|Q5W0H4|Q5W0H4_HUMAN Translationally-controlled tumor protein OS=Homo sapiens GN=TPT1 PE=1 SV=1;tr|A0A0B4J2C3|A0A0B4J2C3_HUMAN Translationally-controlled tumor protein OS=Homo sapiens GN=TPT1 PE=1 SV=1;sp|P13693|TCTP_HUMAN Translationally-controlled tumo	7	6	6	6	4	5	3	3	5	4	4	4	4	5	6	6	4	5	3	3	5	4	4	4	4	5	6	6	4	5	3	3	5	4	4	4	4	5	6	6	53.7	53.7
A0A0C4DFV9;Q01105;A0A087X027;P0DME0	A0A0C4DFV9;Q01105;A0A087X027;P0DME0	5;5;4;4	5;5;4;4	5;5;4;4	Protein SET;Protein SETSIP	SET;SETSIP	tr|A0A0C4DFV9|A0A0C4DFV9_HUMAN Protein SET OS=Homo sapiens GN=SET PE=1 SV=1;sp|Q01105|SET_HUMAN Protein SET OS=Homo sapiens GN=SET PE=1 SV=3;tr|A0A087X027|A0A087X027_HUMAN Protein SETSIP OS=Homo sapiens GN=SETSIP PE=1 SV=1;sp|P0DME0|SETLP_HUMAN Protein SET	4	5	5	5	5	5	5	5	5	5	5	5	5	5	5	5	5	5	5	5	5	5	5	5	5	5	5	5	5	5	5	5	5	5	5	5	5	5	5	5	24.8	24.8
C9J9K3;A0A0C4DG17;P08865;F8WD59	C9J9K3;A0A0C4DG17;P08865;F8WD59	4;4;4;3	4;4;4;3	4;4;4;3	40S ribosomal protein SA	RPSA	tr|C9J9K3|C9J9K3_HUMAN 40S ribosomal protein SA (Fragment) OS=Homo sapiens GN=RPSA PE=1 SV=7;tr|A0A0C4DG17|A0A0C4DG17_HUMAN 40S ribosomal protein SA OS=Homo sapiens GN=RPSA PE=1 SV=1;sp|P08865|RSSA_HUMAN 40S ribosomal protein SA OS=Homo sapiens GN=RPSA PE=	4	4	4	4	3	1	2	0	1	1	2	2	2	0	3	2	3	1	2	0	1	1	2	2	2	0	3	2	3	1	2	0	1	1	2	2	2	0	3	2	18.2	18.2
A0A0C4DG89;D6RJA6;H0Y9U3	A0A0C4DG89	58;26;3	58;26;3	1;0;0		DDX46	tr|A0A0C4DG89|A0A0C4DG89_HUMAN Probable ATP-dependent RNA helicase DDX46 OS=Homo sapiens GN=DDX46 PE=1 SV=1	3	58	58	1	56	55	55	56	56	54	56	55	56	56	56	56	56	55	55	56	56	54	56	55	56	56	56	56	1	1	1	1	1	1	1	1	1	1	1	1	55.8	55.8
A0A0C4DGB6;CON__P02768-1;P02768;H0YA55;A0A087WWT3;C9JKR2;D6RHD5;B7WNR0;H7C013	A0A0C4DGB6;CON__P02768-1;P02768;H0YA55;A0A087WWT3;C9JKR2;D6RHD5;B7WNR0	7;7;7;6;5;5;5;5;2	2;2;2;1;2;1;1;1;1	2;2;2;1;2;1;1;1;1	Serum albumin	ALB	tr|A0A0C4DGB6|A0A0C4DGB6_HUMAN Serum albumin OS=Homo sapiens GN=ALB PE=1 SV=1;;sp|P02768|ALBU_HUMAN Serum albumin OS=Homo sapiens GN=ALB PE=1 SV=2;tr|H0YA55|H0YA55_HUMAN Serum albumin (Fragment) OS=Homo sapiens GN=ALB PE=1 SV=1;tr|A0A087WWT3|A0A087WWT3_HUM	9	7	2	2	5	5	6	5	6	6	5	5	5	5	6	7	0	0	1	0	1	2	0	0	0	0	1	2	0	0	1	0	1	2	0	0	0	0	1	2	10.8	4.5
F5GWX5;A0A0C4DGG9;Q14839;K7EMY3;Q8TDI0;F5H6N4;F2Z2R5;Q12873	F5GWX5;A0A0C4DGG9;Q14839	17;17;17;3;3;1;1;1	17;17;17;3;3;1;1;1	17;17;17;3;3;1;1;1	Chromodomain-helicase-DNA-binding protein 4	CHD4	tr|F5GWX5|F5GWX5_HUMAN Chromodomain-helicase-DNA-binding protein 4 OS=Homo sapiens GN=CHD4 PE=1 SV=1;tr|A0A0C4DGG9|A0A0C4DGG9_HUMAN Chromodomain-helicase-DNA-binding protein 4 OS=Homo sapiens GN=CHD4 PE=1 SV=1;sp|Q14839|CHD4_HUMAN Chromodomain-helicase-DNA	8	17	17	17	12	9	12	16	12	14	13	11	9	10	14	11	12	9	12	16	12	14	13	11	9	10	14	11	12	9	12	16	12	14	13	11	9	10	14	11	13.6	13.6
A0A0C4DGV5;O95218	A0A0C4DGV5;O95218	16;16	16;16	16;16	Zinc finger Ran-binding domain-containing protein 2	ZRANB2	tr|A0A0C4DGV5|A0A0C4DGV5_HUMAN Zinc finger Ran-binding domain-containing protein 2 OS=Homo sapiens GN=ZRANB2 PE=1 SV=1;sp|O95218|ZRAB2_HUMAN Zinc finger Ran-binding domain-containing protein 2 OS=Homo sapiens GN=ZRANB2 PE=1 SV=2	2	16	16	16	16	16	16	16	16	16	16	16	16	16	15	14	16	16	16	16	16	16	16	16	16	16	15	14	16	16	16	16	16	16	16	16	16	16	15	14	40.1	40.1
A0A0D9SEY1;O95819;E7ENQ1;G3XAA2;H7C360;G5E948;E7EN19;E7ESS2;E7EX83;A0A0D9SG62;C9J840;H7C0P6;H7C3Z6;Q8N4C8;I3L2I2;E7ETN6	A0A0D9SEY1;O95819;E7ENQ1;G3XAA2;H7C360;G5E948;E7EN19;E7ESS2;E7EX83;A0A0D9SG62;C9J840;H7C0P6	11;11;10;10;10;10;10;10;8;8;7;7;3;3;2;1	9;9;8;8;8;8;8;8;7;7;6;7;3;1;0;1	9;9;8;8;8;8;8;8;7;7;6;7;3;1;0;1	Mitogen-activated protein kinase kinase kinase kinase 4	MAP4K4	tr|A0A0D9SEY1|A0A0D9SEY1_HUMAN Mitogen-activated protein kinase kinase kinase kinase 4 OS=Homo sapiens GN=MAP4K4 PE=1 SV=1;sp|O95819|M4K4_HUMAN Mitogen-activated protein kinase kinase kinase kinase 4 OS=Homo sapiens GN=MAP4K4 PE=1 SV=2;tr|E7ENQ1|E7ENQ1_HUM	16	11	9	9	8	8	8	10	9	9	8	8	8	7	9	9	6	6	6	8	7	7	6	6	7	5	7	7	6	6	6	8	7	7	6	6	7	5	7	7	11.1	9.5
A0A0D9SFB3;A0A0D9SG12;A0A0D9SF53;O00571;O15523;A0A0J9YVQ7;C9J081;A0A087WVZ1;C9J8G5;D6RCM4;Q9NQI0;A0A0J9YYH6;H0Y960	A0A0D9SFB3;A0A0D9SG12;A0A0D9SF53;O00571;O15523	15;15;15;15;13;4;3;2;2;2;2;1;1	15;15;15;15;13;4;3;2;2;2;2;1;1	14;14;14;14;12;4;3;2;2;2;2;1;1	ATP-dependent RNA helicase DDX3X;ATP-dependent RNA helicase DDX3Y	DDX3X;DDX3Y	tr|A0A0D9SFB3|A0A0D9SFB3_HUMAN ATP-dependent RNA helicase DDX3X OS=Homo sapiens GN=DDX3X PE=1 SV=1;tr|A0A0D9SG12|A0A0D9SG12_HUMAN ATP-dependent RNA helicase DDX3X OS=Homo sapiens GN=DDX3X PE=1 SV=1;tr|A0A0D9SF53|A0A0D9SF53_HUMAN ATP-dependent RNA helicase	13	15	15	14	10	11	10	9	12	11	12	12	11	11	12	13	10	11	10	9	12	11	12	12	11	11	12	13	9	10	9	9	11	10	11	11	10	10	11	12	27.3	27.3
H7BY36;A0A0D9SFL3;B0QYK0;C9JGE3;Q01844	H7BY36;A0A0D9SFL3;B0QYK0;C9JGE3;Q01844	2;2;2;2;2	2;2;2;2;2	2;2;2;2;2	RNA-binding protein EWS	EWSR1	tr|H7BY36|H7BY36_HUMAN RNA-binding protein EWS (Fragment) OS=Homo sapiens GN=EWSR1 PE=1 SV=1;tr|A0A0D9SFL3|A0A0D9SFL3_HUMAN RNA-binding protein EWS OS=Homo sapiens GN=EWSR1 PE=1 SV=1;tr|B0QYK0|B0QYK0_HUMAN RNA-binding protein EWS OS=Homo sapiens GN=EWSR1 P	5	2	2	2	2	0	1	1	1	1	2	1	1	1	0	0	2	0	1	1	1	1	2	1	1	1	0	0	2	0	1	1	1	1	2	1	1	1	0	0	7.5	7.5
A0A0D9SFR6;Q86XP1	A0A0D9SFR6;Q86XP1	1;1	1;1	1;1	Diacylglycerol kinase eta	DGKH	tr|A0A0D9SFR6|A0A0D9SFR6_HUMAN Diacylglycerol kinase OS=Homo sapiens GN=DGKH PE=1 SV=1;sp|Q86XP1|DGKH_HUMAN Diacylglycerol kinase eta OS=Homo sapiens GN=DGKH PE=1 SV=1	2	1	1	1	1	1	0	0	1	1	1	1	1	1	0	0	1	1	0	0	1	1	1	1	1	1	0	0	1	1	0	0	1	1	1	1	1	1	0	0	1.4	1.4
Q5JRC6;A0A0D9SGE8;Q8IWS0	Q5JRC6;A0A0D9SGE8;Q8IWS0	2;2;2	2;2;2	2;2;2	PHD finger protein 6	PHF6	tr|Q5JRC6|Q5JRC6_HUMAN PHD finger protein 6 OS=Homo sapiens GN=PHF6 PE=1 SV=1;tr|A0A0D9SGE8|A0A0D9SGE8_HUMAN PHD finger protein 6 OS=Homo sapiens GN=PHF6 PE=1 SV=1;sp|Q8IWS0|PHF6_HUMAN PHD finger protein 6 OS=Homo sapiens GN=PHF6 PE=1 SV=1	3	2	2	2	2	2	1	2	2	1	1	2	2	2	2	2	2	2	1	2	2	1	1	2	2	2	2	2	2	2	1	2	2	1	1	2	2	2	2	2	9.3	9.3
A0A0G2JIW1;P0DMV9;P0DMV8;V9GZ37	A0A0G2JIW1;P0DMV9;P0DMV8;V9GZ37	32;32;32;23	28;28;28;20	16;16;16;11	Heat shock 70 kDa protein 1B;Heat shock 70 kDa protein 1A	HSPA1B;HSPA1A	tr|A0A0G2JIW1|A0A0G2JIW1_HUMAN Heat shock 70 kDa protein 1B OS=Homo sapiens GN=HSPA1B PE=1 SV=1;sp|P0DMV9|HS71B_HUMAN Heat shock 70 kDa protein 1B OS=Homo sapiens GN=HSPA1B PE=1 SV=1;sp|P0DMV8|HS71A_HUMAN Heat shock 70 kDa protein 1A OS=Homo sapiens GN=HSP	4	32	28	16	31	30	31	31	31	32	30	31	31	30	30	31	27	26	27	27	27	28	26	27	27	26	26	27	15	14	15	16	16	16	15	15	16	15	14	15	58.6	55.5
H0Y6K2;A0A140T9E9;A0A0G2JK44;P25440;A0A140T9V2;A0A0G2JHL0;A0A140T9F7;U3KQA6;A0A0G2JHN8;A0A140T9I1;E9PIQ3;H0YDJ7;U3KPW0;H0Y799;A0A140T9X8;E9PKQ9;REV__A0A0G2JHN8;REV__A0A140T9I1;REV__P25440;REV__H0Y6K2;REV__A0A140T9E9;REV__A0A0G2JK44	H0Y6K2;A0A140T9E9;A0A0G2JK44;P25440;A0A140T9V2;A0A0G2JHL0;A0A140T9F7;U3KQA6	33;33;33;33;25;23;23;22;14;14;14;7;7;7;7;4;1;1;1;1;1;1	33;33;33;33;25;23;23;22;14;14;14;7;7;7;7;4;1;1;1;1;1;1	30;30;30;30;23;21;21;20;13;13;13;6;6;7;7;4;1;1;1;1;1;1	Bromodomain-containing protein 2	BRD2	tr|H0Y6K2|H0Y6K2_HUMAN Bromodomain-containing protein 2 (Fragment) OS=Homo sapiens GN=BRD2 PE=1 SV=1;tr|A0A140T9E9|A0A140T9E9_HUMAN Bromodomain-containing protein 2 (Fragment) OS=Homo sapiens GN=BRD2 PE=1 SV=1;tr|A0A0G2JK44|A0A0G2JK44_HUMAN Bromodomain-con	22	33	33	30	33	32	33	33	33	33	31	32	31	32	29	31	33	32	33	33	33	33	31	32	31	32	29	31	30	29	30	30	30	30	29	30	29	30	27	29	47.5	47.5
C9J2C4;A0A0J9YX62;O75190;C9JB42;C9JDR7;C9JDX6;F8WCZ4;C9J2P2;E9PH18;C9JRD2;C9JXB9;Q8WWF6;Q8NHS0;P25686	C9J2C4;A0A0J9YX62;O75190;C9JB42;C9JDR7;C9JDX6;F8WCZ4;C9J2P2;E9PH18;C9JRD2;C9JXB9;Q8WWF6;Q8NHS0;P25686	2;2;2;1;1;1;1;1;1;1;1;1;1;1	2;2;2;1;1;1;1;1;1;1;1;1;1;1	2;2;2;1;1;1;1;1;1;1;1;1;1;1	DnaJ homolog subfamily B member 6;DnaJ homolog subfamily B member 3;DnaJ homolog subfamily B member 8;DnaJ homolog subfamily B member 2	DNAJB6;DNAJB2;DNAJB3;DNAJB8	tr|C9J2C4|C9J2C4_HUMAN DnaJ homolog subfamily B member 6 (Fragment) OS=Homo sapiens GN=DNAJB6 PE=1 SV=1;tr|A0A0J9YX62|A0A0J9YX62_HUMAN DnaJ homolog subfamily B member 6 OS=Homo sapiens GN=DNAJB6 PE=1 SV=1;sp|O75190|DNJB6_HUMAN DnaJ homolog subfamily B memb	14	2	2	2	1	1	1	2	2	2	1	1	2	2	1	2	1	1	1	2	2	2	1	1	2	2	1	2	1	1	1	2	2	2	1	1	2	2	1	2	10.1	10.1
A0A0R4J2E8;A8MXP9;P43243;D6R991;B3KM87;D6REM6;D6RAM9;D6RAY2;D6RBI2;D6RE02;D6RIA2;Q68E03;H0Y8T4	A0A0R4J2E8;A8MXP9;P43243;D6R991;B3KM87;D6REM6	3;3;3;2;2;2;1;1;1;1;1;1;1	3;3;3;2;2;2;1;1;1;1;1;1;1	3;3;3;2;2;2;1;1;1;1;1;1;1	Matrin-3	MATR3	tr|A0A0R4J2E8|A0A0R4J2E8_HUMAN Matrin-3 OS=Homo sapiens GN=MATR3 PE=1 SV=1;tr|A8MXP9|A8MXP9_HUMAN Matrin-3 OS=Homo sapiens GN=MATR3 PE=1 SV=1;sp|P43243|MATR3_HUMAN Matrin-3 OS=Homo sapiens GN=MATR3 PE=1 SV=2;tr|D6R991|D6R991_HUMAN Matrin-3 (Fragment) OS=Ho	13	3	3	3	2	1	2	0	2	1	1	1	1	1	0	0	2	1	2	0	2	1	1	1	1	1	0	0	2	1	2	0	2	1	1	1	1	1	0	0	4.4	4.4
A0A0U1RQF0;P49327;A0A0U1RRG3	A0A0U1RQF0;P49327	19;19;1	19;19;1	19;19;1	Fatty acid synthase;[Acyl-carrier-protein] S-acetyltransferase;[Acyl-carrier-protein] S-malonyltransferase;3-oxoacyl-[acyl-carrier-protein] synthase;3-oxoacyl-[acyl-carrier-protein] reductase;3-hydroxyacyl-[acyl-carrier-protein] dehydratase;Enoyl-[acyl-carrier-protein] reductase;Oleoyl-[acyl-carrier-protein] hydrolase	FASN	tr|A0A0U1RQF0|A0A0U1RQF0_HUMAN Fatty acid synthase OS=Homo sapiens GN=FASN PE=1 SV=1;sp|P49327|FAS_HUMAN Fatty acid synthase OS=Homo sapiens GN=FASN PE=1 SV=3	3	19	19	19	15	9	10	10	12	10	16	11	11	11	10	10	15	9	10	10	12	10	16	11	11	11	10	10	15	9	10	10	12	10	16	11	11	11	10	10	9.9	9.9
E3W994;J3KR49;A0A0U1RQI6;E7ERI8;E7EW49;O75122	E3W994;J3KR49;A0A0U1RQI6;E7ERI8;E7EW49;O75122	1;1;1;1;1;1	1;1;1;1;1;1	1;1;1;1;1;1	CLIP-associating protein 2	CLASP2	tr|E3W994|E3W994_HUMAN CLIP-associating protein 2 OS=Homo sapiens GN=CLASP2 PE=1 SV=2;tr|J3KR49|J3KR49_HUMAN CLIP-associating protein 2 OS=Homo sapiens GN=CLASP2 PE=1 SV=1;tr|A0A0U1RQI6|A0A0U1RQI6_HUMAN CLIP-associating protein 2 OS=Homo sapiens GN=CLASP2	6	1	1	1	0	1	0	1	0	0	0	0	1	0	1	1	0	1	0	1	0	0	0	0	1	0	1	1	0	1	0	1	0	0	0	0	1	0	1	1	0.9	0.9
A0A0U1RR22;Q9UNF0;B0QYG7;B0QYG8	A0A0U1RR22;Q9UNF0	3;3;1;1	3;3;1;1	3;3;1;1	Protein kinase C and casein kinase substrate in neurons protein 2	PACSIN2	tr|A0A0U1RR22|A0A0U1RR22_HUMAN Protein kinase C and casein kinase substrate in neurons protein 2 (Fragment) OS=Homo sapiens GN=PACSIN2 PE=1 SV=1;sp|Q9UNF0|PACN2_HUMAN Protein kinase C and casein kinase substrate in neurons protein 2 OS=Homo sapiens GN=PACS	4	3	3	3	2	1	2	1	2	2	2	1	2	2	2	2	2	1	2	1	2	2	2	1	2	2	2	2	2	1	2	1	2	2	2	1	2	2	2	2	7.3	7.3
A0AVT1	A0AVT1	4	4	4	Ubiquitin-like modifier-activating enzyme 6	UBA6	sp|A0AVT1|UBA6_HUMAN Ubiquitin-like modifier-activating enzyme 6 OS=Homo sapiens GN=UBA6 PE=1 SV=1	1	4	4	4	1	1	1	3	1	1	1	1	1	3	2	1	1	1	1	3	1	1	1	1	1	3	2	1	1	1	1	3	1	1	1	1	1	3	2	1	4.8	4.8
A2A2D0;P16949;E5RIR6;E7EVN3;Q9H169;A0A0J9YXY4;A0A0J9YW36;REV__B5MD58;REV__P36956;Q9NZ72;H7BZ55	A2A2D0;P16949	9;9;2;2;2;1;1;1;1;1;1	9;9;2;2;2;1;1;1;1;1;1	6;6;0;0;0;0;0;0;0;0;0	Stathmin	STMN1	tr|A2A2D0|A2A2D0_HUMAN Stathmin (Fragment) OS=Homo sapiens GN=STMN1 PE=1 SV=7;sp|P16949|STMN1_HUMAN Stathmin OS=Homo sapiens GN=STMN1 PE=1 SV=3	11	9	9	6	9	9	9	9	9	9	8	9	9	9	7	8	9	9	9	9	9	9	8	9	9	9	7	8	6	6	6	6	6	6	5	6	6	6	5	6	82.6	82.6
A2A369;Q8NF50	A2A369;Q8NF50	1;1	1;1	1;1	Dedicator of cytokinesis protein 8	DOCK8	tr|A2A369|A2A369_HUMAN Dedicator of cytokinesis protein 8 OS=Homo sapiens GN=DOCK8 PE=1 SV=1;sp|Q8NF50|DOCK8_HUMAN Dedicator of cytokinesis protein 8 OS=Homo sapiens GN=DOCK8 PE=1 SV=3	2	1	1	1	0	1	0	0	0	0	0	0	0	0	0	0	0	1	0	0	0	0	0	0	0	0	0	0	0	1	0	0	0	0	0	0	0	0	0	0	0.8	0.8
A2AJT9;H7BXX2;F2Z385	A2AJT9;H7BXX2;F2Z385	10;7;7	10;7;7	10;7;7	Uncharacterized protein CXorf23	CXorf23	sp|A2AJT9|CX023_HUMAN Uncharacterized protein CXorf23 OS=Homo sapiens GN=CXorf23 PE=1 SV=1;tr|H7BXX2|H7BXX2_HUMAN Uncharacterized protein CXorf23 (Fragment) OS=Homo sapiens GN=CXorf23 PE=1 SV=1;tr|F2Z385|F2Z385_HUMAN Uncharacterized protein CXorf23 OS=Homo	3	10	10	10	5	2	5	7	2	2	7	9	10	8	6	8	5	2	5	7	2	2	7	9	10	8	6	8	5	2	5	7	2	2	7	9	10	8	6	8	22.2	22.2
C9JYB8;A2RUB6	C9JYB8;A2RUB6	1;1	1;1	1;1	Coiled-coil domain-containing protein 66	CCDC66	tr|C9JYB8|C9JYB8_HUMAN Coiled-coil domain-containing protein 66 (Fragment) OS=Homo sapiens GN=CCDC66 PE=1 SV=1;sp|A2RUB6|CCD66_HUMAN Coiled-coil domain-containing protein 66 OS=Homo sapiens GN=CCDC66 PE=1 SV=4	2	1	1	1	0	1	0	0	0	0	0	0	0	0	0	0	0	1	0	0	0	0	0	0	0	0	0	0	0	1	0	0	0	0	0	0	0	0	0	0	1.1	1.1
A6NCN2	A6NCN2	13	2	2	Putative keratin-87 protein	KRT87P	sp|A6NCN2|KR87P_HUMAN Putative keratin-87 protein OS=Homo sapiens GN=KRT87P PE=5 SV=4	1	13	2	2	0	13	0	0	0	0	0	0	1	0	0	0	0	2	0	0	0	0	0	0	0	0	0	0	0	2	0	0	0	0	0	0	0	0	0	0	42	7.5
H0YEY4;A6NCQ0;A6NJU6;A6NFX8;Q9UKK9	H0YEY4;A6NCQ0;A6NJU6;A6NFX8;Q9UKK9	2;2;2;2;2	2;2;2;2;2	2;2;2;2;2	ADP-sugar pyrophosphatase	NUDT5	tr|H0YEY4|H0YEY4_HUMAN ADP-sugar pyrophosphatase (Fragment) OS=Homo sapiens GN=NUDT5 PE=1 SV=1;tr|A6NCQ0|A6NCQ0_HUMAN ADP-sugar pyrophosphatase OS=Homo sapiens GN=NUDT5 PE=1 SV=1;tr|A6NJU6|A6NJU6_HUMAN ADP-sugar pyrophosphatase OS=Homo sapiens GN=NUDT5 PE=	5	2	2	2	0	2	0	0	2	1	1	1	0	1	0	1	0	2	0	0	2	1	1	1	0	1	0	1	0	2	0	0	2	1	1	1	0	1	0	1	19	19
A6NMQ3;Q5T5H1;O43768;H3BQ52;H3BTD3;H3BMD8;P56211	A6NMQ3;Q5T5H1;O43768	3;3;3;1;1;1;1	3;3;3;1;1;1;1	3;3;3;1;1;1;1	Alpha-endosulfine	ENSA	tr|A6NMQ3|A6NMQ3_HUMAN Alpha-endosulfine OS=Homo sapiens GN=ENSA PE=1 SV=2;tr|Q5T5H1|Q5T5H1_HUMAN Alpha-endosulfine OS=Homo sapiens GN=ENSA PE=1 SV=1;sp|O43768|ENSA_HUMAN Alpha-endosulfine OS=Homo sapiens GN=ENSA PE=1 SV=1	7	3	3	3	2	1	2	3	2	3	2	2	2	3	2	2	2	1	2	3	2	3	2	2	2	3	2	2	2	1	2	3	2	3	2	2	2	3	2	2	26.4	26.4
Q5TIG5;A8MQ02;J3KN01;P55196;F8W9I4;E9PFY5;H0Y7R8	Q5TIG5;A8MQ02;J3KN01;P55196	5;5;5;5;1;1;1	5;5;5;5;1;1;1	5;5;5;5;1;1;1	Afadin	MLLT4	tr|Q5TIG5|Q5TIG5_HUMAN Afadin OS=Homo sapiens GN=MLLT4 PE=1 SV=1;tr|A8MQ02|A8MQ02_HUMAN Afadin OS=Homo sapiens GN=MLLT4 PE=1 SV=2;tr|J3KN01|J3KN01_HUMAN Afadin OS=Homo sapiens GN=MLLT4 PE=1 SV=1;sp|P55196|AFAD_HUMAN Afadin OS=Homo sapiens GN=MLLT4 PE=1 SV=	7	5	5	5	3	2	3	1	2	3	2	3	2	2	3	2	3	2	3	1	2	3	2	3	2	2	3	2	3	2	3	1	2	3	2	3	2	2	3	2	3.8	3.8
J3QLE5;A8MT02;P63162;P14678;J3KRY3;S4R3P3	J3QLE5;A8MT02;P63162;P14678;J3KRY3;S4R3P3	2;2;2;2;1;1	2;2;2;2;1;1	2;2;2;2;1;1	Small nuclear ribonucleoprotein-associated protein N;Small nuclear ribonucleoprotein-associated proteins B and B	SNRPN;SNRPB	tr|J3QLE5|J3QLE5_HUMAN Small nuclear ribonucleoprotein-associated protein N (Fragment) OS=Homo sapiens GN=SNRPN PE=1 SV=1;tr|A8MT02|A8MT02_HUMAN Small nuclear ribonucleoprotein-associated proteins B and B OS=Homo sapiens GN=SNRPB PE=1 SV=3;sp|P63162|RSMN_	6	2	2	2	1	0	0	0	1	0	1	0	2	2	1	0	1	0	0	0	1	0	1	0	2	2	1	0	1	0	0	0	1	0	1	0	2	2	1	0	8.9	8.9
M0QYV0;A8MT37;P49840	M0QYV0;A8MT37;P49840	1;1;1	1;1;1	1;1;1	Glycogen synthase kinase-3 alpha	GSK3A	tr|M0QYV0|M0QYV0_HUMAN Uncharacterized protein (Fragment) OS=Homo sapiens PE=3 SV=1;tr|A8MT37|A8MT37_HUMAN Glycogen synthase kinase-3 alpha OS=Homo sapiens GN=GSK3A PE=1 SV=2;sp|P49840|GSK3A_HUMAN Glycogen synthase kinase-3 alpha OS=Homo sapiens GN=GSK3A P	3	1	1	1	1	1	1	1	1	1	1	1	1	1	1	1	1	1	1	1	1	1	1	1	1	1	1	1	1	1	1	1	1	1	1	1	1	1	1	1	8.4	8.4
A8MUA9;A8MU27;Q6EEV6;P61956;P55854	A8MUA9;A8MU27;Q6EEV6;P61956;P55854	1;1;1;1;1	1;1;1;1;1	1;1;1;1;1	Small ubiquitin-related modifier 4;Small ubiquitin-related modifier 2;Small ubiquitin-related modifier 3	SUMO3;SUMO4;SUMO2	tr|A8MUA9|A8MUA9_HUMAN SMT3 suppressor of mif two 3 homolog 3 (Yeast), isoform CRA_d OS=Homo sapiens GN=SUMO3 PE=1 SV=1;tr|A8MU27|A8MU27_HUMAN Small ubiquitin-related modifier 3 OS=Homo sapiens GN=SUMO3 PE=1 SV=1;sp|Q6EEV6|SUMO4_HUMAN Small ubiquitin-relat	5	1	1	1	1	1	1	1	1	1	1	1	1	1	1	0	1	1	1	1	1	1	1	1	1	1	1	0	1	1	1	1	1	1	1	1	1	1	1	0	8.9	8.9
H7BY10;K7EJV9;K7ERT8;A8MUS3;P62750;K7EMA7	H7BY10;K7EJV9;K7ERT8;A8MUS3;P62750;K7EMA7	6;6;6;6;6;4	6;6;6;6;6;4	6;6;6;6;6;4	60S ribosomal protein L23a	RPL23A	tr|H7BY10|H7BY10_HUMAN 60S ribosomal protein L23a (Fragment) OS=Homo sapiens GN=RPL23A PE=1 SV=1;tr|K7EJV9|K7EJV9_HUMAN 60S ribosomal protein L23a (Fragment) OS=Homo sapiens GN=RPL23A PE=1 SV=1;tr|K7ERT8|K7ERT8_HUMAN 60S ribosomal protein L23a (Fragment) O	6	6	6	6	6	6	6	6	6	5	5	6	6	6	6	6	6	6	6	6	6	5	5	6	6	6	6	6	6	6	6	6	6	5	5	6	6	6	6	6	32.3	32.3
A9Z1X7;Q8IYB3;E9PCT1;M0R088;M0R1E7;M0QXG5	A9Z1X7;Q8IYB3;E9PCT1;M0R088	17;17;15;10;4;2	17;17;15;10;4;2	17;17;15;10;4;2	Serine/arginine repetitive matrix protein 1	SRRM1	tr|A9Z1X7|A9Z1X7_HUMAN Serine/arginine repetitive matrix protein 1 OS=Homo sapiens GN=SRRM1 PE=1 SV=1;sp|Q8IYB3|SRRM1_HUMAN Serine/arginine repetitive matrix protein 1 OS=Homo sapiens GN=SRRM1 PE=1 SV=2;tr|E9PCT1|E9PCT1_HUMAN Serine/arginine repetitive mat	6	17	17	17	14	15	16	15	16	16	17	15	15	15	16	16	14	15	16	15	16	16	17	15	15	15	16	16	14	15	16	15	16	16	17	15	15	15	16	16	24.1	24.1
B0QYA5;O15371;B0QYA4;B0QYA8;B0QYA6	B0QYA5;O15371	3;3;1;1;1	3;3;1;1;1	3;3;1;1;1	Eukaryotic translation initiation factor 3 subunit D	EIF3D	tr|B0QYA5|B0QYA5_HUMAN Eukaryotic translation initiation factor 3 subunit D (Fragment) OS=Homo sapiens GN=EIF3D PE=1 SV=1;sp|O15371|EIF3D_HUMAN Eukaryotic translation initiation factor 3 subunit D OS=Homo sapiens GN=EIF3D PE=1 SV=1	5	3	3	3	0	2	3	2	2	2	1	2	2	2	2	2	0	2	3	2	2	2	1	2	2	2	2	2	0	2	3	2	2	2	1	2	2	2	2	2	13.4	13.4
B0YJC4;P08670;Q5JVS8;B0YJC5;P17661	B0YJC4;P08670;Q5JVS8;B0YJC5	6;6;3;3;1	5;5;3;3;1	5;5;3;3;1	Vimentin	VIM	tr|B0YJC4|B0YJC4_HUMAN Vimentin OS=Homo sapiens GN=VIM PE=1 SV=1;sp|P08670|VIME_HUMAN Vimentin OS=Homo sapiens GN=VIM PE=1 SV=4;tr|Q5JVS8|Q5JVS8_HUMAN Vimentin (Fragment) OS=Homo sapiens GN=VIM PE=1 SV=1;tr|B0YJC5|B0YJC5_HUMAN Vimentin OS=Homo sapiens GN=V	5	6	5	5	4	2	3	2	3	2	1	4	1	1	1	2	3	1	2	1	2	1	0	3	0	0	0	1	3	1	2	1	2	1	0	3	0	0	0	1	13.2	11.6
B1AHC9;P12956	B1AHC9;P12956	10;10	10;10	10;10	X-ray repair cross-complementing protein 6	XRCC6	tr|B1AHC9|B1AHC9_HUMAN X-ray repair cross-complementing protein 6 OS=Homo sapiens GN=XRCC6 PE=1 SV=1;sp|P12956|XRCC6_HUMAN X-ray repair cross-complementing protein 6 OS=Homo sapiens GN=XRCC6 PE=1 SV=2	2	10	10	10	6	5	8	3	6	6	7	9	8	8	4	3	6	5	8	3	6	6	7	9	8	8	4	3	6	5	8	3	6	6	7	9	8	8	4	3	22.2	22.2
B1AKD8;Q5TZA2	B1AKD8;Q5TZA2	1;1	1;1	1;1	Rootletin	CROCC	tr|B1AKD8|B1AKD8_HUMAN Rootletin (Fragment) OS=Homo sapiens GN=CROCC PE=1 SV=2;sp|Q5TZA2|CROCC_HUMAN Rootletin OS=Homo sapiens GN=CROCC PE=1 SV=1	2	1	1	1	1	1	1	1	1	1	1	1	1	1	1	1	1	1	1	1	1	1	1	1	1	1	1	1	1	1	1	1	1	1	1	1	1	1	1	1	0.6	0.6
B1AN99;P35030	B1AN99;P35030	1;1	1;1	1;1	Trypsin-3	PRSS3	tr|B1AN99|B1AN99_HUMAN Trypsin-3 (Fragment) OS=Homo sapiens GN=PRSS3 PE=1 SV=7;sp|P35030|TRY3_HUMAN Trypsin-3 OS=Homo sapiens GN=PRSS3 PE=1 SV=2	2	1	1	1	1	1	1	1	1	1	1	1	1	1	1	1	1	1	1	1	1	1	1	1	1	1	1	1	1	1	1	1	1	1	1	1	1	1	1	1	7.3	7.3
B2R4S9;U3KQK0;Q99880;Q99879;Q99877;Q93079;Q5QNW6;P62807;P58876;P57053;O60814;Q16778;P33778;P23527;P06899;Q8N257;Q96A08	B2R4S9;U3KQK0;Q99880;Q99879;Q99877;Q93079;Q5QNW6;P62807;P58876;P57053;O60814;Q16778;P33778;P23527;P06899;Q8N257;Q96A08	5;5;5;5;5;5;5;5;5;5;5;4;4;4;4;3;3	5;5;5;5;5;5;5;5;5;5;5;4;4;4;4;3;3	5;5;5;5;5;5;5;5;5;5;5;4;4;4;4;3;3	Histone H2B;Histone H2B type 1-L;Histone H2B type 1-M;Histone H2B type 1-N;Histone H2B type 1-H;Histone H2B type 2-F;Histone H2B type 1-C/E/F/G/I;Histone H2B type 1-D;Histone H2B type F-S;Histone H2B type 1-K;Histone H2B type 2-E;Histone H2B type 1-B;Histone H2B type 1-O;Histone H2B type 1-J;Histone H2B type 3-B;Histone H2B type 1-A	HIST1H2BI;HIST1H2BN;HIST1H2BL;HIST1H2BM;HIST1H2BH;HIST2H2BF;HIST1H2BC;HIST1H2BD;H2BFS;HIST1H2BK;HIST2H2BE;HIST1H2BB;HIST1H2BO;HIST1H2BJ;HIST3H2BB;HIST1H2BA	tr|B2R4S9|B2R4S9_HUMAN Histone H2B OS=Homo sapiens GN=HIST1H2BF PE=2 SV=1;tr|U3KQK0|U3KQK0_HUMAN Histone H2B OS=Homo sapiens GN=HIST1H2BN PE=1 SV=1;sp|Q99880|H2B1L_HUMAN Histone H2B type 1-L OS=Homo sapiens GN=HIST1H2BL PE=1 SV=3;sp|Q99879|H2B1M_HUMAN Hist	17	5	5	5	5	5	4	4	5	5	5	4	4	4	4	4	5	5	4	4	5	5	5	4	4	4	4	4	5	5	4	4	5	5	5	4	4	4	4	4	40.5	40.5
B3KVL5;Q8TBK6;D6RHC2;D6R9G7;G3XAM1	B3KVL5;Q8TBK6;D6RHC2;D6R9G7;G3XAM1	2;2;1;1;1	2;2;1;1;1	2;2;1;1;1	Zinc finger CCHC domain-containing protein 10	ZCCHC10	tr|B3KVL5|B3KVL5_HUMAN Zinc finger CCHC domain-containing protein 10 OS=Homo sapiens GN=ZCCHC10 PE=1 SV=1;sp|Q8TBK6|ZCH10_HUMAN Zinc finger CCHC domain-containing protein 10 OS=Homo sapiens GN=ZCCHC10 PE=1 SV=1;tr|D6RHC2|D6RHC2_HUMAN Zinc finger CCHC domai	5	2	2	2	2	2	2	2	2	2	2	2	2	2	2	2	2	2	2	2	2	2	2	2	2	2	2	2	2	2	2	2	2	2	2	2	2	2	2	2	15.1	15.1
B4DWJ3;Q96CJ1	B4DWJ3;Q96CJ1	3;3	2;2	2;2	ELL-associated factor 2	EAF2	tr|B4DWJ3|B4DWJ3_HUMAN ELL-associated factor 2 OS=Homo sapiens GN=EAF2 PE=1 SV=1;sp|Q96CJ1|EAF2_HUMAN ELL-associated factor 2 OS=Homo sapiens GN=EAF2 PE=1 SV=1	2	3	2	2	2	3	2	2	3	2	3	2	3	3	2	3	1	2	1	1	2	1	2	1	2	2	1	2	1	2	1	1	2	1	2	1	2	2	1	2	15.6	12.9
B4DWR3;P61758	B4DWR3;P61758	3;3	3;3	3;3	Prefoldin subunit 3	VBP1	tr|B4DWR3|B4DWR3_HUMAN Prefoldin subunit 3 OS=Homo sapiens GN=VBP1 PE=1 SV=1;sp|P61758|PFD3_HUMAN Prefoldin subunit 3 OS=Homo sapiens GN=VBP1 PE=1 SV=3	2	3	3	3	1	2	1	1	1	2	1	3	2	2	3	3	1	2	1	1	1	2	1	3	2	2	3	3	1	2	1	1	1	2	1	3	2	2	3	3	16.7	16.7
Q8NBY1;B4E0Y9;Q9P289;C9JJV0;Q5JV99;C9JDH9;C9J6L2;C9JCC0;C9J232;Q5JV98;H7C279;H0Y630;B4DR80;O00506;Q9Y6E0	Q8NBY1;B4E0Y9;Q9P289	3;3;3;1;1;1;1;1;1;1;1;1;1;1;1	3;3;3;1;1;1;1;1;1;1;1;1;1;1;1	3;3;3;1;1;1;1;1;1;1;1;1;1;1;1	Serine/threonine-protein kinase 26	STK26	tr|Q8NBY1|Q8NBY1_HUMAN Serine/threonine-protein kinase 26 OS=Homo sapiens GN=STK26 PE=1 SV=1;tr|B4E0Y9|B4E0Y9_HUMAN Serine/threonine-protein kinase 26 OS=Homo sapiens GN=STK26 PE=1 SV=1;sp|Q9P289|STK26_HUMAN Serine/threonine-protein kinase 26 OS=Homo sapie	15	3	3	3	1	1	2	2	2	3	2	2	1	2	0	1	1	1	2	2	2	3	2	2	1	2	0	1	1	1	2	2	2	3	2	2	1	2	0	1	9.7	9.7
C9J2Q4;B5MCX3;Q15019;C9IY94;C9J938;H7C310;C9JB25;C9IZU3;C9JQJ4;B5MD47;H7C2Y0	C9J2Q4;B5MCX3;Q15019;C9IY94;C9J938;H7C310;C9JB25;C9IZU3;C9JQJ4	4;4;4;3;3;3;3;2;2;1;1	4;4;4;3;3;3;3;2;2;1;1	4;4;4;3;3;3;3;2;2;1;1	Septin-2	2019-09-02	tr|C9J2Q4|C9J2Q4_HUMAN Septin-2 (Fragment) OS=Homo sapiens GN=SEPT2 PE=1 SV=1;tr|B5MCX3|B5MCX3_HUMAN Septin-2 OS=Homo sapiens GN=SEPT2 PE=1 SV=1;sp|Q15019|SEPT2_HUMAN Septin-2 OS=Homo sapiens GN=SEPT2 PE=1 SV=1;tr|C9IY94|C9IY94_HUMAN Septin-2 (Fragment) OS	11	4	4	4	4	4	4	4	4	4	4	3	3	4	4	4	4	4	4	4	4	4	4	3	3	4	4	4	4	4	4	4	4	4	4	3	3	4	4	4	26.6	26.6
B5MDF5;P62826;J3KQE5;F5H018;B4DV51;H0YFC6;A0A087X0W0	B5MDF5;P62826;J3KQE5;F5H018;B4DV51	8;8;7;6;4;3;1	8;8;7;6;4;3;1	8;8;7;6;4;3;1	GTP-binding nuclear protein Ran	RAN	tr|B5MDF5|B5MDF5_HUMAN GTP-binding nuclear protein Ran OS=Homo sapiens GN=RAN PE=1 SV=1;sp|P62826|RAN_HUMAN GTP-binding nuclear protein Ran OS=Homo sapiens GN=RAN PE=1 SV=3;tr|J3KQE5|J3KQE5_HUMAN GTP-binding nuclear protein Ran (Fragment) OS=Homo sapiens G	7	8	8	8	6	5	6	6	7	6	7	6	8	6	8	6	6	5	6	6	7	6	7	6	8	6	8	6	6	5	6	6	7	6	7	6	8	6	8	6	38.2	38.2
B7WPG3;C9IYN3;D6W592;Q8WVV9;C9JJZ7;H7BXH8	B7WPG3;C9IYN3;D6W592;Q8WVV9	3;3;3;3;1;1	3;3;3;3;1;1	3;3;3;3;1;1	Heterogeneous nuclear ribonucleoprotein L-like	HNRNPLL;HNRPLL	tr|B7WPG3|B7WPG3_HUMAN Heterogeneous nuclear ribonucleoprotein L-like OS=Homo sapiens GN=HNRNPLL PE=1 SV=1;tr|C9IYN3|C9IYN3_HUMAN Heterogeneous nuclear ribonucleoprotein L-like OS=Homo sapiens GN=HNRNPLL PE=1 SV=2;tr|D6W592|D6W592_HUMAN Heterogeneous nucle	6	3	3	3	1	2	1	2	1	1	2	2	2	3	1	3	1	2	1	2	1	1	2	2	2	3	1	3	1	2	1	2	1	1	2	2	2	3	1	3	8.3	8.3
F5H7S3;H7BYY1;B7Z596;H0YK48;H0YN06;H0YK20;H0YL42	F5H7S3;H7BYY1;B7Z596;H0YK48	8;8;8;7;2;1;1	4;4;4;3;2;1;1	3;3;3;3;2;0;0		TPM1	tr|F5H7S3|F5H7S3_HUMAN Tropomyosin alpha-1 chain OS=Homo sapiens GN=TPM1 PE=1 SV=2;tr|H7BYY1|H7BYY1_HUMAN Tropomyosin 1 (Alpha), isoform CRA_m OS=Homo sapiens GN=TPM1 PE=1 SV=1;tr|B7Z596|B7Z596_HUMAN Tropomyosin alpha-1 chain OS=Homo sapiens GN=TPM1 PE=1 S	7	8	4	3	8	8	8	6	6	7	5	6	6	5	6	6	4	4	4	2	2	3	1	2	2	1	2	2	3	3	3	1	1	2	0	1	1	0	1	1	30.2	17.6
F8VPF3;F8W1R7;J3KND3;G8JLA2;G3V1V0;F8W1I5;B7Z6Z4;P60660;P14649	F8VPF3;F8W1R7;J3KND3;G8JLA2;G3V1V0;F8W1I5;B7Z6Z4;P60660;P14649	2;2;2;2;2;2;2;2;2	2;2;2;2;2;2;2;2;2	2;2;2;2;2;2;2;2;2	Myosin light polypeptide 6;Myosin light chain 6B	MYL6;MYL6B	tr|F8VPF3|F8VPF3_HUMAN Myosin light polypeptide 6 (Fragment) OS=Homo sapiens GN=MYL6 PE=1 SV=1;tr|F8W1R7|F8W1R7_HUMAN Myosin light polypeptide 6 OS=Homo sapiens GN=MYL6 PE=1 SV=1;tr|J3KND3|J3KND3_HUMAN Myosin light polypeptide 6 OS=Homo sapiens GN=MYL6 PE=	9	2	2	2	2	0	2	2	1	2	1	0	0	1	1	0	2	0	2	2	1	2	1	0	0	1	1	0	2	0	2	2	1	2	1	0	0	1	1	0	18.5	18.5
B8ZZQ6;P06454;B8ZZA1;B8ZZW7;H7C2N1	B8ZZQ6;P06454;B8ZZA1;B8ZZW7;H7C2N1	2;2;1;1;1	2;2;1;1;1	2;2;1;1;1	Prothymosin alpha;Prothymosin alpha, N-terminally processed;Thymosin alpha-1	PTMA	tr|B8ZZQ6|B8ZZQ6_HUMAN Prothymosin alpha OS=Homo sapiens GN=PTMA PE=1 SV=1;sp|P06454|PTMA_HUMAN Prothymosin alpha OS=Homo sapiens GN=PTMA PE=1 SV=2;tr|B8ZZA1|B8ZZA1_HUMAN Prothymosin alpha OS=Homo sapiens GN=PTMA PE=1 SV=1;tr|B8ZZW7|B8ZZW7_HUMAN Prothymosi	5	2	2	2	2	2	2	2	2	2	2	1	2	2	1	2	2	2	2	2	2	2	2	1	2	2	1	2	2	2	2	2	2	2	2	1	2	2	1	2	22.4	22.4
B9A041;P40925;B8ZZ51;C9JF79;C9JRL4	B9A041;P40925;B8ZZ51;C9JF79	4;4;3;3;1	4;4;3;3;1	4;4;3;3;1	Malate dehydrogenase, cytoplasmic;Malate dehydrogenase	MDH1	tr|B9A041|B9A041_HUMAN Malate dehydrogenase, cytoplasmic OS=Homo sapiens GN=MDH1 PE=1 SV=1;sp|P40925|MDHC_HUMAN Malate dehydrogenase, cytoplasmic OS=Homo sapiens GN=MDH1 PE=1 SV=4;tr|B8ZZ51|B8ZZ51_HUMAN Malate dehydrogenase, cytoplasmic OS=Homo sapiens GN=	5	4	4	4	4	4	4	4	3	3	4	4	2	4	4	3	4	4	4	4	3	3	4	4	2	4	4	3	4	4	4	4	3	3	4	4	2	4	4	3	27.6	27.6
B9ZVT1;Q8IXT5;E5RHG1;E5RJ83;E5RJV8	B9ZVT1;Q8IXT5	10;10;1;1;1	10;10;1;1;1	10;10;1;1;1	RNA-binding protein 12B	RBM12B	tr|B9ZVT1|B9ZVT1_HUMAN RNA-binding protein 12B OS=Homo sapiens GN=RBM12B PE=1 SV=2;sp|Q8IXT5|RB12B_HUMAN RNA-binding protein 12B OS=Homo sapiens GN=RBM12B PE=1 SV=2	5	10	10	10	1	2	2	6	3	4	3	0	8	3	3	5	1	2	2	6	3	4	3	0	8	3	3	5	1	2	2	6	3	4	3	0	8	3	3	5	14.1	14.1
C9JUP7;C9IZA5;P55072	C9JUP7;C9IZA5;P55072	1;1;1	1;1;1	1;1;1	Transitional endoplasmic reticulum ATPase	VCP	tr|C9JUP7|C9JUP7_HUMAN Transitional endoplasmic reticulum ATPase (Fragment) OS=Homo sapiens GN=VCP PE=1 SV=1;tr|C9IZA5|C9IZA5_HUMAN Transitional endoplasmic reticulum ATPase (Fragment) OS=Homo sapiens GN=VCP PE=1 SV=1;sp|P55072|TERA_HUMAN Transitional endo	3	1	1	1	0	1	1	1	1	1	1	1	1	1	1	1	0	1	1	1	1	1	1	1	1	1	1	1	0	1	1	1	1	1	1	1	1	1	1	1	12.2	12.2
I3L4P0;I3L1S9;C9IZD3;Q68EM7	I3L4P0;I3L1S9;C9IZD3;Q68EM7	1;1;1;1	1;1;1;1	1;1;1;1	Rho GTPase-activating protein 17	ARHGAP17	tr|I3L4P0|I3L4P0_HUMAN Rho GTPase-activating protein 17 OS=Homo sapiens GN=ARHGAP17 PE=1 SV=1;tr|I3L1S9|I3L1S9_HUMAN Rho GTPase-activating protein 17 OS=Homo sapiens GN=ARHGAP17 PE=1 SV=1;tr|C9IZD3|C9IZD3_HUMAN Rho GTPase-activating protein 17 (Fragment) O	4	1	1	1	0	0	0	0	0	1	1	0	1	0	1	0	0	0	0	0	0	1	1	0	1	0	1	0	0	0	0	0	0	1	1	0	1	0	1	0	21.1	21.1
C9IZG4;O60888	C9IZG4;O60888	2;2	2;2	2;2	Protein CutA	CUTA	tr|C9IZG4|C9IZG4_HUMAN Protein CutA OS=Homo sapiens GN=CUTA PE=1 SV=1;sp|O60888|CUTA_HUMAN Protein CutA OS=Homo sapiens GN=CUTA PE=1 SV=2	2	2	2	2	2	2	2	2	2	2	2	2	1	2	2	2	2	2	2	2	2	2	2	2	1	2	2	2	2	2	2	2	2	2	2	2	1	2	2	2	19.3	19.3
C9J0A7;Q9UQN3;A0A087WW88;Q92828	C9J0A7;Q9UQN3;A0A087WW88	3;3;2;1	3;3;2;1	3;3;2;1	Charged multivesicular body protein 2b	CHMP2B	tr|C9J0A7|C9J0A7_HUMAN Charged multivesicular body protein 2b OS=Homo sapiens GN=CHMP2B PE=1 SV=1;sp|Q9UQN3|CHM2B_HUMAN Charged multivesicular body protein 2b OS=Homo sapiens GN=CHMP2B PE=1 SV=1;tr|A0A087WW88|A0A087WW88_HUMAN Charged multivesicular body pr	4	3	3	3	3	3	3	3	3	2	3	3	3	3	3	3	3	3	3	3	3	2	3	3	3	3	3	3	3	3	3	3	3	2	3	3	3	3	3	3	14.8	14.8
C9J0D1;Q71UI9;P0C0S5;C9J386;A0A0U1RR32;A0A0U1RRH7;Q99878;Q96KK5;Q9BTM1;Q16777;Q93077;Q7L7L0;Q6FI13;P20671;P0C0S8;P04908;Q96QV6;P16104;H0YFX9;Q8IUE6	C9J0D1;Q71UI9;P0C0S5;C9J386;A0A0U1RR32;A0A0U1RRH7;Q99878;Q96KK5;Q9BTM1;Q16777;Q93077;Q7L7L0;Q6FI13;P20671;P0C0S8;P04908;Q96QV6;P16104	3;3;3;2;2;2;2;2;2;2;2;2;2;2;2;2;2;2;1;1	3;3;3;2;2;2;2;2;2;2;2;2;2;2;2;2;2;2;1;1	3;3;3;2;2;2;2;2;2;2;2;2;2;2;2;2;2;2;1;1	Histone H2A;Histone H2A.V;Histone H2A.Z;Histone H2A type 1-J;Histone H2A type 1-H;Histone H2A.J;Histone H2A type 2-C;Histone H2A type 1-C;Histone H2A type 3;Histone H2A type 2-A;Histone H2A type 1-D;Histone H2A type 1;Histone H2A type 1-B/E;Histone H2A type 1-A;Histone H2AX	H2AFV;H2AFZ;HIST1H2AJ;HIST1H2AH;H2AFJ;HIST2H2AC;HIST1H2AC;HIST3H2A;HIST2H2AA3;HIST1H2AD;HIST1H2AG;HIST1H2AB;HIST1H2AA;H2AFX	tr|C9J0D1|C9J0D1_HUMAN Histone H2A OS=Homo sapiens GN=H2AFV PE=1 SV=1;sp|Q71UI9|H2AV_HUMAN Histone H2A.V OS=Homo sapiens GN=H2AFV PE=1 SV=3;sp|P0C0S5|H2AZ_HUMAN Histone H2A.Z OS=Homo sapiens GN=H2AFZ PE=1 SV=2;tr|C9J386|C9J386_HUMAN Histone H2A OS=Homo sap	20	3	3	3	2	2	2	1	1	0	1	0	2	1	1	1	2	2	2	1	1	0	1	0	2	1	1	1	2	2	2	1	1	0	1	0	2	1	1	1	21.3	21.3
C9J4Z3;P61513;M0R0A1;Q6P4E4;E9PEL3;M0R2L6;G5E9R3;A6NKH3	C9J4Z3;P61513;M0R0A1;Q6P4E4;E9PEL3;M0R2L6	3;3;2;2;2;2;1;1	3;3;2;2;2;2;1;1	3;3;2;2;2;2;1;1	60S ribosomal protein L37a	RPL37A	tr|C9J4Z3|C9J4Z3_HUMAN 60S ribosomal protein L37a OS=Homo sapiens GN=RPL37A PE=1 SV=1;sp|P61513|RL37A_HUMAN 60S ribosomal protein L37a OS=Homo sapiens GN=RPL37A PE=1 SV=2;tr|M0R0A1|M0R0A1_HUMAN 60S ribosomal protein L37a OS=Homo sapiens GN=RPL37A PE=1 SV=1	8	3	3	3	2	3	2	3	3	3	3	3	3	3	2	3	2	3	2	3	3	3	3	3	3	3	2	3	2	3	2	3	3	3	3	3	3	3	2	3	55.9	55.9
C9J659;Q68DQ2	C9J659;Q68DQ2	1;1	1;1	1;1	Very large A-kinase anchor protein	CRYBG3	tr|C9J659|C9J659_HUMAN Very large A-kinase anchor protein (Fragment) OS=Homo sapiens GN=CRYBG3 PE=1 SV=1;sp|Q68DQ2|CRBG3_HUMAN Very large A-kinase anchor protein OS=Homo sapiens GN=CRYBG3 PE=1 SV=3	2	1	1	1	0	0	0	0	0	0	0	1	0	0	0	0	0	0	0	0	0	0	0	1	0	0	0	0	0	0	0	0	0	0	0	1	0	0	0	0	6.9	6.9
C9J6P4;Q7Z2W4	C9J6P4;Q7Z2W4	4;4	4;4	4;4	Zinc finger CCCH-type antiviral protein 1	ZC3HAV1	tr|C9J6P4|C9J6P4_HUMAN Zinc finger CCCH-type antiviral protein 1 OS=Homo sapiens GN=ZC3HAV1 PE=1 SV=1;sp|Q7Z2W4|ZCCHV_HUMAN Zinc finger CCCH-type antiviral protein 1 OS=Homo sapiens GN=ZC3HAV1 PE=1 SV=3	2	4	4	4	2	2	2	3	3	3	3	2	3	3	2	3	2	2	2	3	3	3	3	2	3	3	2	3	2	2	2	3	3	3	3	2	3	3	2	3	5.7	5.7
C9J7S3;C9JLC1;P14868	C9J7S3;C9JLC1;P14868	1;1;1	1;1;1	1;1;1	Aspartate--tRNA ligase, cytoplasmic	DARS	tr|C9J7S3|C9J7S3_HUMAN Aspartate--tRNA ligase, cytoplasmic (Fragment) OS=Homo sapiens GN=DARS PE=1 SV=7;tr|C9JLC1|C9JLC1_HUMAN Aspartate--tRNA ligase, cytoplasmic (Fragment) OS=Homo sapiens GN=DARS PE=1 SV=1;sp|P14868|SYDC_HUMAN Aspartate--tRNA ligase, cyt	3	1	1	1	0	0	0	0	0	0	1	1	1	1	0	0	0	0	0	0	0	0	1	1	1	1	0	0	0	0	0	0	0	0	1	1	1	1	0	0	11.4	11.4
C9J813;E9PGZ1;E7EX44;Q05682;REV__Q96P20;J3KRQ5;E7EVM7;Q96P20;Q9H5I5	C9J813;E9PGZ1;E7EX44;Q05682;REV__Q96P20;J3KRQ5;E7EVM7;Q96P20;Q9H5I5	2;2;2;2;1;1;1;1;1	1;1;1;1;0;0;0;0;0	1;1;1;1;0;0;0;0;0	Caldesmon;Piezo-type mechanosensitive ion channel component;NACHT, LRR and PYD domains-containing protein 3;Piezo-type mechanosensitive ion channel component 2	CALD1;PIEZO2;NLRP3	tr|C9J813|C9J813_HUMAN Caldesmon (Fragment) OS=Homo sapiens GN=CALD1 PE=1 SV=1;tr|E9PGZ1|E9PGZ1_HUMAN Caldesmon OS=Homo sapiens GN=CALD1 PE=1 SV=1;tr|E7EX44|E7EX44_HUMAN Caldesmon OS=Homo sapiens GN=CALD1 PE=1 SV=1;sp|Q05682|CALD1_HUMAN Caldesmon OS=Homo s	9	2	1	1	2	2	2	2	2	2	2	2	2	2	1	2	1	1	1	1	1	1	1	1	1	1	0	1	1	1	1	1	1	1	1	1	1	1	0	1	5	3.5
E9PFE3;C9JF98;F8WDX8;E7EMS9;Q75MG1;E7ETZ4;Q9Y6E2	E9PFE3;C9JF98;F8WDX8;E7EMS9;Q75MG1;E7ETZ4;Q9Y6E2	2;2;2;2;2;2;2	2;2;2;2;2;2;2	2;2;2;2;2;2;2	Basic leucine zipper and W2 domain-containing protein 2	BZW2	tr|E9PFE3|E9PFE3_HUMAN Basic leucine zipper and W2 domain-containing protein 2 OS=Homo sapiens GN=BZW2 PE=1 SV=1;tr|C9JF98|C9JF98_HUMAN Basic leucine zipper and W2 domain-containing protein 2 (Fragment) OS=Homo sapiens GN=BZW2 PE=1 SV=7;tr|F8WDX8|F8WDX8_HU	7	2	2	2	2	2	2	1	1	1	2	2	2	2	2	2	2	2	2	1	1	1	2	2	2	2	2	2	2	2	2	1	1	1	2	2	2	2	2	2	18	18
C9JFR7;P99999;CON__P62894	C9JFR7;P99999;CON__P62894	2;2;1	2;2;1	2;2;1	Cytochrome c	CYCS	tr|C9JFR7|C9JFR7_HUMAN Cytochrome c (Fragment) OS=Homo sapiens GN=CYCS PE=1 SV=1;sp|P99999|CYC_HUMAN Cytochrome c OS=Homo sapiens GN=CYCS PE=1 SV=2;	3	2	2	2	2	1	2	1	1	1	1	1	1	1	1	1	2	1	2	1	1	1	1	1	1	1	1	1	2	1	2	1	1	1	1	1	1	1	1	1	24.8	24.8
C9JL85;P58546	C9JL85;P58546	2;2	2;2	2;2	Myotrophin	MTPN	tr|C9JL85|C9JL85_HUMAN Myotrophin OS=Homo sapiens GN=MTPN PE=1 SV=1;sp|P58546|MTPN_HUMAN Myotrophin OS=Homo sapiens GN=MTPN PE=1 SV=2	2	2	2	2	1	2	2	2	2	2	1	2	2	1	2	2	1	2	2	2	2	2	1	2	2	1	2	2	1	2	2	2	2	2	1	2	2	1	2	2	51.9	51.9
C9JMA6;P0DN79;P35520	C9JMA6;P0DN79;P35520	1;1;1	1;1;1	1;1;1	Cystathionine beta-synthase	CBS	tr|C9JMA6|C9JMA6_HUMAN Cystathionine beta-synthase (Fragment) OS=Homo sapiens GN=CBS PE=1 SV=1;sp|P0DN79|CBSL_HUMAN Cystathionine beta-synthase-like protein OS=Homo sapiens GN=CBSL PE=1 SV=1;sp|P35520|CBS_HUMAN Cystathionine beta-synthase OS=Homo sapiens G	3	1	1	1	1	1	1	1	1	1	1	1	1	1	1	1	1	1	1	1	1	1	1	1	1	1	1	1	1	1	1	1	1	1	1	1	1	1	1	1	9.6	9.6
C9JXB8;C9JNW5;P83731	C9JXB8;C9JNW5;P83731	5;5;5	5;5;5	5;5;5	60S ribosomal protein L24	RPL24	tr|C9JXB8|C9JXB8_HUMAN 60S ribosomal protein L24 OS=Homo sapiens GN=RPL24 PE=1 SV=1;tr|C9JNW5|C9JNW5_HUMAN 60S ribosomal protein L24 OS=Homo sapiens GN=RPL24 PE=1 SV=1;sp|P83731|RL24_HUMAN 60S ribosomal protein L24 OS=Homo sapiens GN=RPL24 PE=1 SV=1	3	5	5	5	5	5	5	5	5	5	5	5	5	5	5	5	5	5	5	5	5	5	5	5	5	5	5	5	5	5	5	5	5	5	5	5	5	5	5	5	38	38
C9JPM4;P18085;C9JAK5;U3KQF2	C9JPM4;P18085;C9JAK5	3;3;2;1	3;3;2;1	2;2;2;1	ADP-ribosylation factor 4	ARF4	tr|C9JPM4|C9JPM4_HUMAN ADP-ribosylation factor 4 (Fragment) OS=Homo sapiens GN=ARF4 PE=1 SV=1;sp|P18085|ARF4_HUMAN ADP-ribosylation factor 4 OS=Homo sapiens GN=ARF4 PE=1 SV=3;tr|C9JAK5|C9JAK5_HUMAN ADP-ribosylation factor 4 OS=Homo sapiens GN=ARF4 PE=1 SV=	4	3	3	2	1	2	2	1	1	1	2	1	1	1	1	2	1	2	2	1	1	1	2	1	1	1	1	2	0	1	1	0	0	0	1	0	0	0	0	1	24.4	24.4
C9JSU1;Q9Y608;C9JJC9;C9JC17;C9J321;C9J0U5;Q32MZ4	C9JSU1;Q9Y608;C9JJC9;C9JC17;C9J321;C9J0U5;Q32MZ4	2;2;1;1;1;1;1	2;2;1;1;1;1;1	2;2;1;1;1;1;1	Leucine-rich repeat flightless-interacting protein 2;Leucine-rich repeat flightless-interacting protein 1	LRRFIP2;LRRFIP1	tr|C9JSU1|C9JSU1_HUMAN Leucine-rich repeat flightless-interacting protein 2 (Fragment) OS=Homo sapiens GN=LRRFIP2 PE=1 SV=1;sp|Q9Y608|LRRF2_HUMAN Leucine-rich repeat flightless-interacting protein 2 OS=Homo sapiens GN=LRRFIP2 PE=1 SV=1;tr|C9JJC9|C9JJC9_HUM	7	2	2	2	1	1	0	1	0	1	0	0	1	0	1	2	1	1	0	1	0	1	0	0	1	0	1	2	1	1	0	1	0	1	0	0	1	0	1	2	11.1	11.1
C9JVN9;Q9H9P8	C9JVN9;Q9H9P8	1;1	1;1	1;1	L-2-hydroxyglutarate dehydrogenase, mitochondrial	L2HGDH	tr|C9JVN9|C9JVN9_HUMAN L-2-hydroxyglutarate dehydrogenase, mitochondrial OS=Homo sapiens GN=L2HGDH PE=1 SV=1;sp|Q9H9P8|L2HDH_HUMAN L-2-hydroxyglutarate dehydrogenase, mitochondrial OS=Homo sapiens GN=L2HGDH PE=1 SV=3	2	1	1	1	1	0	1	1	0	1	1	0	1	1	1	1	1	0	1	1	0	1	1	0	1	1	1	1	1	0	1	1	0	1	1	0	1	1	1	1	2.7	2.7
C9JZ20;E7ESE2;E9PCW0;C9JW96;P35232	C9JZ20;E7ESE2;E9PCW0;C9JW96;P35232	2;2;2;2;2	2;2;2;2;2	2;2;2;2;2	Prohibitin	PHB	tr|C9JZ20|C9JZ20_HUMAN Prohibitin (Fragment) OS=Homo sapiens GN=PHB PE=1 SV=1;tr|E7ESE2|E7ESE2_HUMAN Prohibitin (Fragment) OS=Homo sapiens GN=PHB PE=1 SV=2;tr|E9PCW0|E9PCW0_HUMAN Prohibitin (Fragment) OS=Homo sapiens GN=PHB PE=1 SV=2;tr|C9JW96|C9JW96_HUMAN	5	2	2	2	1	0	2	0	0	0	1	0	0	0	0	0	1	0	2	0	0	0	1	0	0	0	0	0	1	0	2	0	0	0	1	0	0	0	0	0	9.5	9.5
C9K025;P18077;F8WBS5;F8WB72	C9K025;P18077;F8WBS5;F8WB72	3;3;2;2	3;3;2;2	3;3;2;2	60S ribosomal protein L35a	RPL35A	tr|C9K025|C9K025_HUMAN 60S ribosomal protein L35a (Fragment) OS=Homo sapiens GN=RPL35A PE=1 SV=1;sp|P18077|RL35A_HUMAN 60S ribosomal protein L35a OS=Homo sapiens GN=RPL35A PE=1 SV=2;tr|F8WBS5|F8WBS5_HUMAN 60S ribosomal protein L35a OS=Homo sapiens GN=RPL35	4	3	3	3	3	3	2	2	2	3	3	3	1	3	3	2	3	3	2	2	2	3	3	3	1	3	3	2	3	3	2	2	2	3	3	3	1	3	3	2	29.8	29.8
C9K0I0;Q9UJT2	C9K0I0;Q9UJT2	1;1	1;1	1;1	Testis-specific serine kinase substrate	TSKS	tr|C9K0I0|C9K0I0_HUMAN Testis-specific serine kinase substrate OS=Homo sapiens GN=TSKS PE=1 SV=1;sp|Q9UJT2|TSKS_HUMAN Testis-specific serine kinase substrate OS=Homo sapiens GN=TSKS PE=1 SV=3	2	1	1	1	0	0	0	1	0	0	0	0	0	0	1	0	0	0	0	1	0	0	0	0	0	0	1	0	0	0	0	1	0	0	0	0	0	0	1	0	3.6	3.6
K7ERE3;CON__ENSEMBL:ENSP00000377550;P13646;K7EMD9;K7EQH6;CON__P35900;CON__Q2M2I5;P35900;Q2M2I5	K7ERE3;CON__ENSEMBL:ENSP00000377550;P13646;K7EMD9	10;10;10;8;3;3;3;3;3	2;2;2;1;0;0;0;0;0	0;0;0;0;0;0;0;0;0	Keratin, type I cytoskeletal 13	KRT13	tr|K7ERE3|K7ERE3_HUMAN Keratin, type I cytoskeletal 13 OS=Homo sapiens GN=KRT13 PE=1 SV=1;;sp|P13646|K1C13_HUMAN Keratin, type I cytoskeletal 13 OS=Homo sapiens GN=KRT13 PE=1 SV=4;tr|K7EMD9|K7EMD9_HUMAN Keratin, type I cytoskeletal 13 (Fragment) OS=Homo sa	9	10	2	0	6	7	5	6	9	5	6	5	5	4	5	5	0	0	0	0	2	0	0	0	0	0	0	0	0	0	0	0	0	0	0	0	0	0	0	0	18.8	5.3
D3YTB1;F8W727;P62910	D3YTB1;F8W727;P62910	6;6;6	6;6;6	6;6;6	60S ribosomal protein L32	RPL32	tr|D3YTB1|D3YTB1_HUMAN 60S ribosomal protein L32 (Fragment) OS=Homo sapiens GN=RPL32 PE=1 SV=1;tr|F8W727|F8W727_HUMAN 60S ribosomal protein L32 OS=Homo sapiens GN=RPL32 PE=1 SV=1;sp|P62910|RL32_HUMAN 60S ribosomal protein L32 OS=Homo sapiens GN=RPL32 PE=1	3	6	6	6	5	4	5	4	4	5	6	6	5	6	6	6	5	4	5	4	4	5	6	6	5	6	6	6	5	4	5	4	4	5	6	6	5	6	6	6	44.4	44.4
D4PHA4;Q86WP2	D4PHA4;Q86WP2	3;3	3;3	3;3	Vasculin	GPBP1	tr|D4PHA4|D4PHA4_HUMAN GC-rich promoter binding protein 1, isoform CRA_c OS=Homo sapiens GN=GPBP1 PE=1 SV=1;sp|Q86WP2|GPBP1_HUMAN Vasculin OS=Homo sapiens GN=GPBP1 PE=1 SV=1	2	3	3	3	3	3	3	3	2	3	3	2	2	3	2	3	3	3	3	3	2	3	3	2	2	3	2	3	3	3	3	3	2	3	3	2	2	3	2	3	8.1	8.1
D6R9I9;P61221;D6RGF4;H0Y990	D6R9I9;P61221;D6RGF4;H0Y990	4;4;3;2	4;4;3;2	4;4;3;2	ATP-binding cassette sub-family E member 1	ABCE1	tr|D6R9I9|D6R9I9_HUMAN ATP-binding cassette sub-family E member 1 OS=Homo sapiens GN=ABCE1 PE=1 SV=1;sp|P61221|ABCE1_HUMAN ATP-binding cassette sub-family E member 1 OS=Homo sapiens GN=ABCE1 PE=1 SV=1;tr|D6RGF4|D6RGF4_HUMAN ATP-binding cassette sub-family	4	4	4	4	4	2	3	2	2	2	3	3	3	3	3	3	4	2	3	2	2	2	3	3	3	3	3	3	4	2	3	2	2	2	3	3	3	3	3	3	11.6	11.6
D6RFX4;D6RFZ9;D6RHH4;D6R9Z1;D6R9L0;P63244;D6RAU2;E9PD14;D6RBD0;H0YAF8;J3KPE3;H0Y8W2;D6RGK8;D6R909;H0YAM7;D6RAC2;D6REE5	D6RFX4;D6RFZ9;D6RHH4;D6R9Z1;D6R9L0;P63244;D6RAU2;E9PD14;D6RBD0;H0YAF8;J3KPE3;H0Y8W2	3;3;3;3;3;3;2;2;2;2;2;2;1;1;1;1;1	3;3;3;3;3;3;2;2;2;2;2;2;1;1;1;1;1	3;3;3;3;3;3;2;2;2;2;2;2;1;1;1;1;1	Guanine nucleotide-binding protein subunit beta-2-like 1;Guanine nucleotide-binding protein subunit beta-2-like 1, N-terminally processed	GNB2L1	tr|D6RFX4|D6RFX4_HUMAN Receptor of-activated protein C kinase 1 (Fragment) OS=Homo sapiens GN=RACK1 PE=1 SV=1;tr|D6RFZ9|D6RFZ9_HUMAN Receptor of-activated protein C kinase 1 (Fragment) OS=Homo sapiens GN=RACK1 PE=1 SV=7;tr|D6RHH4|D6RHH4_HUMAN Receptor of-a	17	3	3	3	2	0	1	0	1	1	3	2	2	1	1	1	2	0	1	0	1	1	3	2	2	1	1	1	2	0	1	0	1	1	3	2	2	1	1	1	19.1	19.1
D6RF44;H0YA96;D6RAF8;H0Y8G5;Q14103;D6RBQ9;D6RD83	D6RF44;H0YA96;D6RAF8;H0Y8G5;Q14103;D6RBQ9;D6RD83	4;4;4;4;4;3;2	4;4;4;4;4;3;2	3;3;3;3;3;2;2	Heterogeneous nuclear ribonucleoprotein D0	HNRNPD	tr|D6RF44|D6RF44_HUMAN Heterogeneous nuclear ribonucleoprotein D0 (Fragment) OS=Homo sapiens GN=HNRNPD PE=1 SV=7;tr|H0YA96|H0YA96_HUMAN Heterogeneous nuclear ribonucleoprotein D0 (Fragment) OS=Homo sapiens GN=HNRNPD PE=1 SV=1;tr|D6RAF8|D6RAF8_HUMAN Heterog	7	4	4	3	4	4	3	3	3	2	3	4	2	4	3	2	4	4	3	3	3	2	3	4	2	4	3	2	3	3	2	2	3	2	3	3	2	3	3	2	39.3	39.3
E5RGV0;D6RIU0;D6RBM0;E9PCY7;G8JLB6;P31943;E5RGH4;E7EQJ0;D6RAM1;D6R9T0;D6RFM3;D6RIT2;E7EN40;D6RDU3;D6RJ04;D6RIH9;P55795;D6R9D3;D6RF17;D6RDL0;H0YAQ2;H0YB39	E5RGV0;D6RIU0;D6RBM0;E9PCY7;G8JLB6;P31943;E5RGH4;E7EQJ0;D6RAM1;D6R9T0;D6RFM3;D6RIT2;E7EN40;D6RDU3;D6RJ04;D6RIH9;P55795	3;3;3;3;3;3;2;2;2;2;2;2;2;2;2;2;2;1;1;1;1;1	3;3;3;3;3;3;2;2;2;2;2;2;2;2;2;2;2;1;1;1;1;1	3;3;3;3;3;3;2;2;2;2;2;2;2;2;2;2;2;1;1;1;1;1	Heterogeneous nuclear ribonucleoprotein H;Heterogeneous nuclear ribonucleoprotein H, N-terminally processed;Heterogeneous nuclear ribonucleoprotein H2	HNRNPH1;HNRNPH2	tr|E5RGV0|E5RGV0_HUMAN Heterogeneous nuclear ribonucleoprotein H (Fragment) OS=Homo sapiens GN=HNRNPH1 PE=1 SV=1;tr|D6RIU0|D6RIU0_HUMAN Heterogeneous nuclear ribonucleoprotein H (Fragment) OS=Homo sapiens GN=HNRNPH1 PE=1 SV=1;tr|D6RBM0|D6RBM0_HUMAN Heterog	22	3	3	3	2	2	2	1	1	3	3	3	2	2	2	1	2	2	2	1	1	3	3	3	2	2	2	1	2	2	2	1	1	3	3	3	2	2	2	1	29.7	29.7
D6RCK3;Q9H8S9;Q7L9L4	D6RCK3;Q9H8S9;Q7L9L4	2;2;2	2;2;2	2;2;2	MOB kinase activator 1A;MOB kinase activator 1B	MOB1B;MOB1A	tr|D6RCK3|D6RCK3_HUMAN MOB kinase activator 1B (Fragment) OS=Homo sapiens GN=MOB1B PE=4 SV=1;sp|Q9H8S9|MOB1A_HUMAN MOB kinase activator 1A OS=Homo sapiens GN=MOB1A PE=1 SV=4;sp|Q7L9L4|MOB1B_HUMAN MOB kinase activator 1B OS=Homo sapiens GN=MOB1B PE=1 SV=3	3	2	2	2	2	0	0	1	2	2	2	2	2	2	2	1	2	0	0	1	2	2	2	2	2	2	2	1	2	0	0	1	2	2	2	2	2	2	2	1	18.5	18.5
D6REP8;D6RE99;D6RD60;P49773;D6RC06	D6REP8;D6RE99;D6RD60;P49773;D6RC06	3;3;3;3;2	3;3;3;3;2	3;3;3;3;2	Histidine triad nucleotide-binding protein 1	HINT1	tr|D6REP8|D6REP8_HUMAN Histidine triad nucleotide-binding protein 1 OS=Homo sapiens GN=HINT1 PE=1 SV=1;tr|D6RE99|D6RE99_HUMAN Histidine triad nucleotide-binding protein 1 OS=Homo sapiens GN=HINT1 PE=1 SV=1;tr|D6RD60|D6RD60_HUMAN Histidine triad nucleotide-	5	3	3	3	2	2	2	2	3	3	2	3	3	2	3	1	2	2	2	2	3	3	2	3	3	2	3	1	2	2	2	2	3	3	2	3	3	2	3	1	48.7	48.7
D6RD77;J3KPI9;Q56VL3	D6RD77;J3KPI9;Q56VL3	1;1;1	1;1;1	1;1;1	OCIA domain-containing protein 2	OCIAD2	tr|D6RD77|D6RD77_HUMAN OCIA domain-containing protein 2 OS=Homo sapiens GN=OCIAD2 PE=1 SV=1;tr|J3KPI9|J3KPI9_HUMAN OCIA domain-containing protein 2 OS=Homo sapiens GN=OCIAD2 PE=1 SV=1;sp|Q56VL3|OCAD2_HUMAN OCIA domain-containing protein 2 OS=Homo sapiens G	3	1	1	1	1	0	0	0	0	1	0	0	1	0	0	1	1	0	0	0	0	1	0	0	1	0	0	1	1	0	0	0	0	1	0	0	1	0	0	1	27.9	27.9
E5RIF1;D6RG00;H0YBX6;I3L0A0;Q15819;Q13404	E5RIF1;D6RG00;H0YBX6;I3L0A0;Q15819;Q13404	1;1;1;1;1;1	1;1;1;1;1;1	1;1;1;1;1;1	Ubiquitin-conjugating enzyme E2 variant 2;Ubiquitin-conjugating enzyme E2 variant 1	UBE2V2;UBE2V1;TMEM189-UBE2V1	tr|E5RIF1|E5RIF1_HUMAN Ubiquitin-conjugating enzyme E2 variant 2 (Fragment) OS=Homo sapiens GN=UBE2V2 PE=4 SV=1;tr|D6RG00|D6RG00_HUMAN HCG2018358, isoform CRA_d OS=Homo sapiens GN=UBE2V1 PE=4 SV=2;tr|H0YBX6|H0YBX6_HUMAN Ubiquitin-conjugating enzyme E2 vari	6	1	1	1	1	1	1	1	1	1	1	0	1	1	1	1	1	1	1	1	1	1	1	0	1	1	1	1	1	1	1	1	1	1	1	0	1	1	1	1	19.2	19.2
D6RH05;Q9ULG3	D6RH05;Q9ULG3	1;1	1;1	1;1	Uncharacterized protein KIAA1257	KIAA1257	tr|D6RH05|D6RH05_HUMAN HCG20001, isoform CRA_b OS=Homo sapiens GN=KIAA1257 PE=4 SV=1;sp|Q9ULG3|K1257_HUMAN Uncharacterized protein KIAA1257 OS=Homo sapiens GN=KIAA1257 PE=2 SV=2	2	1	1	1	1	1	1	1	1	0	1	1	1	0	1	1	1	1	1	1	1	0	1	1	1	0	1	1	1	1	1	1	1	0	1	1	1	0	1	1	3.8	3.8
D6RJ98;Q99570	D6RJ98;Q99570	1;1	1;1	1;1	Phosphoinositide 3-kinase regulatory subunit 4	PIK3R4	tr|D6RJ98|D6RJ98_HUMAN Phosphoinositide 3-kinase regulatory subunit 4 (Fragment) OS=Homo sapiens GN=PIK3R4 PE=1 SV=1;sp|Q99570|PI3R4_HUMAN Phosphoinositide 3-kinase regulatory subunit 4 OS=Homo sapiens GN=PIK3R4 PE=1 SV=3	2	1	1	1	0	0	0	0	1	1	1	1	1	1	0	1	0	0	0	0	1	1	1	1	1	1	0	1	0	0	0	0	1	1	1	1	1	1	0	1	9.3	9.3
E5RGQ3;Q9H446;E5RGS5;E5RJE3	E5RGQ3;Q9H446;E5RGS5	3;3;2;1	3;3;2;1	3;3;2;1	RWD domain-containing protein 1	RWDD1	tr|E5RGQ3|E5RGQ3_HUMAN RWD domain-containing protein 1 (Fragment) OS=Homo sapiens GN=RWDD1 PE=1 SV=1;sp|Q9H446|RWDD1_HUMAN RWD domain-containing protein 1 OS=Homo sapiens GN=RWDD1 PE=1 SV=1;tr|E5RGS5|E5RGS5_HUMAN RWD domain-containing protein 1 (Fragment)	4	3	3	3	3	3	3	2	2	3	2	3	2	3	2	3	3	3	3	2	2	3	2	3	2	3	2	3	3	3	3	2	2	3	2	3	2	3	2	3	48.6	48.6
E5RGX5;Q93045	E5RGX5;Q93045	4;4	1;1	1;1	Stathmin;Stathmin-2	STMN2	tr|E5RGX5|E5RGX5_HUMAN Stathmin OS=Homo sapiens GN=STMN2 PE=1 SV=1;sp|Q93045|STMN2_HUMAN Stathmin-2 OS=Homo sapiens GN=STMN2 PE=1 SV=3	2	4	1	1	4	4	4	4	4	4	4	4	4	4	3	3	1	1	1	1	1	1	1	1	1	1	1	1	1	1	1	1	1	1	1	1	1	1	1	1	16.1	6
E5RI99;P62888;A0A0B4J213;E5RJH3;A0A0C4DH44	E5RI99;P62888;A0A0B4J213;E5RJH3;A0A0C4DH44	4;4;2;2;2	4;4;2;2;2	4;4;2;2;2	60S ribosomal protein L30	RPL30	tr|E5RI99|E5RI99_HUMAN 60S ribosomal protein L30 (Fragment) OS=Homo sapiens GN=RPL30 PE=1 SV=1;sp|P62888|RL30_HUMAN 60S ribosomal protein L30 OS=Homo sapiens GN=RPL30 PE=1 SV=2;tr|A0A0B4J213|A0A0B4J213_HUMAN 60S ribosomal protein L30 OS=Homo sapiens GN=RPL	5	4	4	4	4	3	3	4	3	3	3	4	3	4	3	3	4	3	3	4	3	3	3	4	3	4	3	3	4	3	3	4	3	3	3	4	3	4	3	3	48.2	48.2
E5RIW3;E5RJD8;O75347;E5RHG6;E5RIX8	E5RIW3;E5RJD8;O75347;E5RHG6	12;12;12;9;4	12;12;12;9;4	12;12;12;9;4	Tubulin-specific chaperone A	TBCA	tr|E5RIW3|E5RIW3_HUMAN Tubulin-specific chaperone A OS=Homo sapiens GN=TBCA PE=1 SV=1;tr|E5RJD8|E5RJD8_HUMAN Tubulin-specific chaperone A OS=Homo sapiens GN=TBCA PE=1 SV=1;sp|O75347|TBCA_HUMAN Tubulin-specific chaperone A OS=Homo sapiens GN=TBCA PE=1 SV=3;	5	12	12	12	12	11	12	10	11	10	9	11	10	10	10	10	12	11	12	10	11	10	9	11	10	10	10	10	12	11	12	10	11	10	9	11	10	10	10	10	76.2	76.2
E5RJR5;P63208	E5RJR5;P63208	1;1	1;1	1;1	S-phase kinase-associated protein 1	SKP1	tr|E5RJR5|E5RJR5_HUMAN S-phase kinase-associated protein 1 OS=Homo sapiens GN=SKP1 PE=1 SV=1;sp|P63208|SKP1_HUMAN S-phase kinase-associated protein 1 OS=Homo sapiens GN=SKP1 PE=1 SV=2	2	1	1	1	0	0	1	0	1	1	1	1	1	1	1	0	0	0	1	0	1	1	1	1	1	1	1	0	0	0	1	0	1	1	1	1	1	1	1	0	7.4	7.4
E9PLD0;E7END7;Q9H0U4;Q92928;P62820	E9PLD0;E7END7;Q9H0U4;Q92928;P62820	2;2;2;2;2	2;2;2;2;2	2;2;2;2;2	Ras-related protein Rab-1B;Putative Ras-related protein Rab-1C;Ras-related protein Rab-1A	RAB1B;RAB1A;RAB1C	tr|E9PLD0|E9PLD0_HUMAN Ras-related protein Rab-1B OS=Homo sapiens GN=RAB1B PE=1 SV=1;tr|E7END7|E7END7_HUMAN Ras-related protein Rab-1A OS=Homo sapiens GN=RAB1A PE=1 SV=1;sp|Q9H0U4|RAB1B_HUMAN Ras-related protein Rab-1B OS=Homo sapiens GN=RAB1B PE=1 SV=1;sp	5	2	2	2	1	1	1	1	1	1	2	1	1	1	1	0	1	1	1	1	1	1	2	1	1	1	1	0	1	1	1	1	1	1	2	1	1	1	1	0	14.2	14.2
E7EPB3;P50914	E7EPB3;P50914	4;4	4;4	4;4	60S ribosomal protein L14	RPL14	tr|E7EPB3|E7EPB3_HUMAN 60S ribosomal protein L14 OS=Homo sapiens GN=RPL14 PE=1 SV=1;sp|P50914|RL14_HUMAN 60S ribosomal protein L14 OS=Homo sapiens GN=RPL14 PE=1 SV=4	2	4	4	4	3	4	4	4	4	4	4	4	4	4	4	4	3	4	4	4	4	4	4	4	4	4	4	4	3	4	4	4	4	4	4	4	4	4	4	4	36.3	36.3
E7EPG1;Q13201	E7EPG1;Q13201	1;1	1;1	1;1	Multimerin-1;Platelet glycoprotein Ia*;155 kDa platelet multimerin	MMRN1	tr|E7EPG1|E7EPG1_HUMAN Multimerin-1 OS=Homo sapiens GN=MMRN1 PE=1 SV=1;sp|Q13201|MMRN1_HUMAN Multimerin-1 OS=Homo sapiens GN=MMRN1 PE=1 SV=3	2	1	1	1	0	1	0	0	0	0	0	0	0	0	0	0	0	1	0	0	0	0	0	0	0	0	0	0	0	1	0	0	0	0	0	0	0	0	0	0	1.2	1.2
G3V1Q4;E7ES33;E7EPK1;Q16181;A0A0U1RRE1;A0A0U1RRH9	G3V1Q4;E7ES33;E7EPK1;Q16181;A0A0U1RRE1	4;4;4;4;2;1	4;4;4;4;2;1	4;4;4;4;2;1	Septin-7	2019-09-07	tr|G3V1Q4|G3V1Q4_HUMAN Septin-7 OS=Homo sapiens GN=SEPT7 PE=1 SV=2;tr|E7ES33|E7ES33_HUMAN Septin-7 OS=Homo sapiens GN=SEPT7 PE=1 SV=3;tr|E7EPK1|E7EPK1_HUMAN Septin-7 OS=Homo sapiens GN=SEPT7 PE=1 SV=2;sp|Q16181|SEPT7_HUMAN Septin-7 OS=Homo sapiens GN=SEPT7	6	4	4	4	3	3	3	3	3	1	3	2	1	3	3	4	3	3	3	3	3	1	3	2	1	3	3	4	3	3	3	3	3	1	3	2	1	3	3	4	12.5	12.5
E7EPN9;Q9Y520	E7EPN9;Q9Y520	5;5	5;5	5;5	Protein PRRC2C	PRRC2C	tr|E7EPN9|E7EPN9_HUMAN Protein PRRC2C OS=Homo sapiens GN=PRRC2C PE=1 SV=1;sp|Q9Y520|PRC2C_HUMAN Protein PRRC2C OS=Homo sapiens GN=PRRC2C PE=1 SV=4	2	5	5	5	3	3	3	3	4	3	3	3	3	3	4	4	3	3	3	3	4	3	3	3	3	3	4	4	3	3	3	3	4	3	3	3	3	3	4	4	3.3	3.3
E7EQR4;P15311;P35241;V9GZ54;E9PQ82;E9PNV3	E7EQR4;P15311	13;13;6;1;1;1	13;13;6;1;1;1	7;7;0;0;0;0	Ezrin	EZR	tr|E7EQR4|E7EQR4_HUMAN Ezrin OS=Homo sapiens GN=EZR PE=1 SV=3;sp|P15311|EZRI_HUMAN Ezrin OS=Homo sapiens GN=EZR PE=1 SV=4	6	13	13	7	8	7	8	8	8	8	8	10	8	7	9	10	8	7	8	8	8	8	8	10	8	7	9	10	5	4	5	5	6	5	5	6	5	5	6	6	21.3	21.3
E9PES6;E7ES08;E7EQU1;O15347	E9PES6;E7ES08;E7EQU1;O15347	4;4;4;4	4;4;4;4	4;4;4;4	High mobility group protein B3	HMGB3	tr|E9PES6|E9PES6_HUMAN High mobility group protein B3 (Fragment) OS=Homo sapiens GN=HMGB3 PE=1 SV=1;tr|E7ES08|E7ES08_HUMAN High mobility group protein B3 (Fragment) OS=Homo sapiens GN=HMGB3 PE=1 SV=1;tr|E7EQU1|E7EQU1_HUMAN High mobility group protein B3 (F	4	4	4	4	3	4	3	3	2	3	2	4	2	4	3	4	3	4	3	3	2	3	2	4	2	4	3	4	3	4	3	3	2	3	2	4	2	4	3	4	26.8	26.8
E7ERS3;Q86VM9;H3BP01;H3BPD0;H3BRH3;H3BRN6	E7ERS3;Q86VM9	28;28;7;6;3;2	28;28;7;6;3;2	28;28;7;6;3;2	Zinc finger CCCH domain-containing protein 18	ZC3H18	tr|E7ERS3|E7ERS3_HUMAN Zinc finger CCCH domain-containing protein 18 OS=Homo sapiens GN=ZC3H18 PE=1 SV=1;sp|Q86VM9|ZCH18_HUMAN Zinc finger CCCH domain-containing protein 18 OS=Homo sapiens GN=ZC3H18 PE=1 SV=2	6	28	28	28	25	27	24	26	26	25	27	24	24	25	26	26	25	27	24	26	26	25	27	24	24	25	26	26	25	27	24	26	26	25	27	24	24	25	26	26	39	39
E7ESY4;Q13330;H7C3F3;H0Y4T7;F8W9Y9	E7ESY4;Q13330;H7C3F3;H0Y4T7	6;6;3;3;1	2;2;1;1;1	2;2;1;1;1	Metastasis-associated protein MTA1	MTA1	tr|E7ESY4|E7ESY4_HUMAN Metastasis-associated protein MTA1 OS=Homo sapiens GN=MTA1 PE=1 SV=1;sp|Q13330|MTA1_HUMAN Metastasis-associated protein MTA1 OS=Homo sapiens GN=MTA1 PE=1 SV=2;tr|H7C3F3|H7C3F3_HUMAN Metastasis-associated protein MTA1 (Fragment) OS=Ho	5	6	2	2	5	5	6	6	6	6	6	5	6	5	6	5	1	1	2	2	2	2	2	1	2	1	2	2	1	1	2	2	2	2	2	1	2	1	2	2	9	3.4
E7ET15;H7C4V2;C9J5L1	E7ET15	38;9;3	1;0;0	1;0;0		U2SURP	tr|E7ET15|E7ET15_HUMAN U2 snRNP-associated SURP motif-containing protein OS=Homo sapiens GN=U2SURP PE=1 SV=1	3	38	1	1	35	32	36	34	34	36	34	37	34	35	33	33	1	1	1	1	1	1	1	1	1	1	1	1	1	1	1	1	1	1	1	1	1	1	1	1	44.1	4.1
E7ETY2;H0YA99	E7ETY2	39;5	1;0	1;0		TCOF1	tr|E7ETY2|E7ETY2_HUMAN Treacle protein OS=Homo sapiens GN=TCOF1 PE=1 SV=1	2	39	1	1	34	34	35	33	36	34	31	35	31	34	33	31	1	1	1	1	1	1	1	1	1	1	1	1	1	1	1	1	1	1	1	1	1	1	1	1	25.8	0.8
E7EVA0;P27816;H0Y2V1;H7C4C5;F8W9U4;B5MEG9	E7EVA0;P27816;H0Y2V1;H7C4C5;F8W9U4;B5MEG9	6;6;4;4;4;3	6;6;4;4;4;3	6;6;4;4;4;3	Microtubule-associated protein;Microtubule-associated protein 4	MAP4	tr|E7EVA0|E7EVA0_HUMAN Microtubule-associated protein OS=Homo sapiens GN=MAP4 PE=1 SV=1;sp|P27816|MAP4_HUMAN Microtubule-associated protein 4 OS=Homo sapiens GN=MAP4 PE=1 SV=3;tr|H0Y2V1|H0Y2V1_HUMAN Microtubule-associated protein (Fragment) OS=Homo sapiens	6	6	6	6	4	3	3	3	5	5	5	5	6	5	4	4	4	3	3	3	5	5	5	5	6	5	4	4	4	3	3	3	5	5	5	5	6	5	4	4	3.7	3.7
F8W0K0;F8VSC7;F8VP89;E7EX17;P23588;F8VYE9;F8VX11	F8W0K0;F8VSC7;F8VP89;E7EX17;P23588;F8VYE9;F8VX11	2;2;2;2;2;1;1	2;2;2;2;2;1;1	2;2;2;2;2;1;1	Eukaryotic translation initiation factor 4B	EIF4B	tr|F8W0K0|F8W0K0_HUMAN Eukaryotic translation initiation factor 4B (Fragment) OS=Homo sapiens GN=EIF4B PE=1 SV=7;tr|F8VSC7|F8VSC7_HUMAN Eukaryotic translation initiation factor 4B OS=Homo sapiens GN=EIF4B PE=1 SV=1;tr|F8VP89|F8VP89_HUMAN Eukaryotic transla	7	2	2	2	2	2	2	2	2	2	2	2	2	2	2	2	2	2	2	2	2	2	2	2	2	2	2	2	2	2	2	2	2	2	2	2	2	2	2	2	7.1	7.1
F8VZJ2;F8W0W4;H0YHX9;Q13765;E9PAV3;F8W1N5;F8VNW4;F8VZ58;Q9BZK3	F8VZJ2;F8W0W4;H0YHX9;Q13765;E9PAV3;F8W1N5;F8VNW4	4;4;4;4;4;3;3;1;1	4;4;4;4;4;3;3;1;1	4;4;4;4;4;3;3;1;1	Nascent polypeptide-associated complex subunit alpha;Nascent polypeptide-associated complex subunit alpha, muscle-specific form	NACA	tr|F8VZJ2|F8VZJ2_HUMAN Nascent polypeptide-associated complex subunit alpha OS=Homo sapiens GN=NACA PE=1 SV=1;tr|F8W0W4|F8W0W4_HUMAN Nascent polypeptide-associated complex subunit alpha (Fragment) OS=Homo sapiens GN=NACA PE=1 SV=1;tr|H0YHX9|H0YHX9_HUMAN Na	9	4	4	4	3	3	3	2	0	3	2	2	2	3	2	1	3	3	3	2	0	3	2	2	2	3	2	1	3	3	3	2	0	3	2	2	2	3	2	1	40.4	40.4
E9PB61;Q86V81	E9PB61;Q86V81	1;1	1;1	1;1	THO complex subunit 4	ALYREF	tr|E9PB61|E9PB61_HUMAN THO complex subunit 4 OS=Homo sapiens GN=ALYREF PE=1 SV=1;sp|Q86V81|THOC4_HUMAN THO complex subunit 4 OS=Homo sapiens GN=ALYREF PE=1 SV=3	2	1	1	1	0	0	0	0	0	0	0	1	0	0	0	0	0	0	0	0	0	0	0	1	0	0	0	0	0	0	0	0	0	0	0	1	0	0	0	0	5.7	5.7
E9PBF6;P20700;A0A0D9SFE5;A0A0D9SFY5	E9PBF6;P20700;A0A0D9SFE5	5;5;4;2	5;5;4;2	4;4;4;2	Lamin-B1	LMNB1	tr|E9PBF6|E9PBF6_HUMAN Lamin-B1 OS=Homo sapiens GN=LMNB1 PE=1 SV=1;sp|P20700|LMNB1_HUMAN Lamin-B1 OS=Homo sapiens GN=LMNB1 PE=1 SV=2;tr|A0A0D9SFE5|A0A0D9SFE5_HUMAN Lamin B1, isoform CRA_a OS=Homo sapiens GN=LMNB1 PE=1 SV=1	4	5	5	4	4	4	3	1	3	4	5	5	4	5	2	1	4	4	3	1	3	4	5	5	4	5	2	1	3	3	2	1	2	3	4	4	3	4	2	1	14.7	14.7
E9PBS1;P22234;D6RF62	E9PBS1;P22234;D6RF62	7;7;5	7;7;5	7;7;5	Multifunctional protein ADE2;Phosphoribosylaminoimidazole-succinocarboxamide synthase;Phosphoribosylaminoimidazole carboxylase	PAICS	tr|E9PBS1|E9PBS1_HUMAN Multifunctional protein ADE2 (Fragment) OS=Homo sapiens GN=PAICS PE=1 SV=1;sp|P22234|PUR6_HUMAN Multifunctional protein ADE2 OS=Homo sapiens GN=PAICS PE=1 SV=3;tr|D6RF62|D6RF62_HUMAN Multifunctional protein ADE2 OS=Homo sapiens GN=PA	3	7	7	7	5	4	5	3	4	4	3	3	4	3	5	4	5	4	5	3	4	4	3	3	4	3	5	4	5	4	5	3	4	4	3	3	4	3	5	4	16.5	16.5
E9PC52;Q16576;Q5JP01;Q5JNZ6;C9J7L0	E9PC52;Q16576;Q5JP01	6;6;3;2;1	6;6;3;2;1	3;3;2;1;1	Histone-binding protein RBBP7	RBBP7	tr|E9PC52|E9PC52_HUMAN Histone-binding protein RBBP7 OS=Homo sapiens GN=RBBP7 PE=1 SV=1;sp|Q16576|RBBP7_HUMAN Histone-binding protein RBBP7 OS=Homo sapiens GN=RBBP7 PE=1 SV=1;tr|Q5JP01|Q5JP01_HUMAN Histone-binding protein RBBP7 (Fragment) OS=Homo sapiens G	5	6	6	3	6	5	4	2	4	3	2	3	3	3	3	4	6	5	4	2	4	3	2	3	3	3	3	4	3	2	2	1	2	2	1	2	2	3	1	2	20.4	20.4
E9PDE8;O95757;D6RJ96	E9PDE8;O95757;D6RJ96	6;6;5	3;3;2	3;3;2	Heat shock 70 kDa protein 4L	HSPA4L	tr|E9PDE8|E9PDE8_HUMAN Heat shock 70 kDa protein 4L OS=Homo sapiens GN=HSPA4L PE=1 SV=1;sp|O95757|HS74L_HUMAN Heat shock 70 kDa protein 4L OS=Homo sapiens GN=HSPA4L PE=1 SV=3;tr|D6RJ96|D6RJ96_HUMAN Heat shock 70 kDa protein 4L (Fragment) OS=Homo sapiens GN	3	6	3	3	3	2	3	2	2	1	3	4	2	4	3	2	2	1	2	2	1	1	2	2	0	3	1	1	2	1	2	2	1	1	2	2	0	3	1	1	9.6	4.2
E9PFK5;P78316	E9PFK5;P78316	5;5	5;5	5;5	Nucleolar protein 14	NOP14	tr|E9PFK5|E9PFK5_HUMAN Nucleolar protein 14 OS=Homo sapiens GN=NOP14 PE=1 SV=1;sp|P78316|NOP14_HUMAN Nucleolar protein 14 OS=Homo sapiens GN=NOP14 PE=1 SV=3	2	5	5	5	3	3	4	0	2	2	1	1	0	2	1	1	3	3	4	0	2	2	1	1	0	2	1	1	3	3	4	0	2	2	1	1	0	2	1	1	8	8
E9PGM4;Q04446	E9PGM4;Q04446	2;2	2;2	2;2	1,4-alpha-glucan-branching enzyme	GBE1	tr|E9PGM4|E9PGM4_HUMAN 1,4-alpha-glucan-branching enzyme OS=Homo sapiens GN=GBE1 PE=1 SV=1;sp|Q04446|GLGB_HUMAN 1,4-alpha-glucan-branching enzyme OS=Homo sapiens GN=GBE1 PE=1 SV=3	2	2	2	2	2	1	2	1	1	2	1	1	2	2	1	1	2	1	2	1	1	2	1	1	2	2	1	1	2	1	2	1	1	2	1	1	2	2	1	1	4.4	4.4
E9PHI6;Q9Y6G9	E9PHI6;Q9Y6G9	2;2	2;2	2;2	Cytoplasmic dynein 1 light intermediate chain 1	DYNC1LI1	tr|E9PHI6|E9PHI6_HUMAN Cytoplasmic dynein 1 light intermediate chain 1 OS=Homo sapiens GN=DYNC1LI1 PE=1 SV=1;sp|Q9Y6G9|DC1L1_HUMAN Cytoplasmic dynein 1 light intermediate chain 1 OS=Homo sapiens GN=DYNC1LI1 PE=1 SV=3	2	2	2	2	1	0	2	1	1	2	2	2	1	2	1	1	1	0	2	1	1	2	2	2	1	2	1	1	1	0	2	1	1	2	2	2	1	2	1	1	7.1	7.1
E9PJ60;Q9UHI6	E9PJ60;Q9UHI6	2;2	2;2	2;2	Probable ATP-dependent RNA helicase DDX20	DDX20	tr|E9PJ60|E9PJ60_HUMAN Probable ATP-dependent RNA helicase DDX20 OS=Homo sapiens GN=DDX20 PE=1 SV=1;sp|Q9UHI6|DDX20_HUMAN Probable ATP-dependent RNA helicase DDX20 OS=Homo sapiens GN=DDX20 PE=1 SV=2	2	2	2	2	2	1	2	2	2	2	1	2	2	2	1	1	2	1	2	2	2	2	1	2	2	2	1	1	2	1	2	2	2	2	1	2	2	2	1	1	7.6	7.6
E9PMI6;E9PJF4;J3KN38;P54105	E9PMI6;E9PJF4;J3KN38;P54105	1;1;1;1	1;1;1;1	1;1;1;1	Methylosome subunit pICln	CLNS1A	tr|E9PMI6|E9PMI6_HUMAN Methylosome subunit pICln OS=Homo sapiens GN=CLNS1A PE=1 SV=1;tr|E9PJF4|E9PJF4_HUMAN Methylosome subunit pICln OS=Homo sapiens GN=CLNS1A PE=1 SV=1;tr|J3KN38|J3KN38_HUMAN Methylosome subunit pICln OS=Homo sapiens GN=CLNS1A PE=1 SV=1;s	4	1	1	1	1	1	1	1	1	1	1	1	1	1	1	1	1	1	1	1	1	1	1	1	1	1	1	1	1	1	1	1	1	1	1	1	1	1	1	1	7.8	7.8
E9PK91;E9PQN2;E9PKI6;E9PK09;E9PJA7;H0YF00;H0YF63	E9PK91;E9PQN2;E9PKI6;E9PK09	41;36;36;35;16;6;5	1;0;0;0;0;0;1	1;0;0;0;0;0;1		BCLAF1	tr|E9PK91|E9PK91_HUMAN Bcl-2-associated transcription factor 1 OS=Homo sapiens GN=BCLAF1 PE=1 SV=1;tr|E9PQN2|E9PQN2_HUMAN Bcl-2-associated transcription factor 1 OS=Homo sapiens GN=BCLAF1 PE=1 SV=1;tr|E9PKI6|E9PKI6_HUMAN Bcl-2-associated transcription fact	7	41	1	1	37	37	38	39	39	39	39	39	38	38	41	39	1	1	1	1	1	1	1	1	1	1	1	1	1	1	1	1	1	1	1	1	1	1	1	1	44.3	1.8
E9PKP7;E9PMM2;H0YDH7	E9PKP7	41;8;3	1;0;0	1;0;0		UBTF	tr|E9PKP7|E9PKP7_HUMAN Nucleolar transcription factor 1 OS=Homo sapiens GN=UBTF PE=1 SV=1	3	41	1	1	38	38	38	38	40	39	38	40	38	40	40	41	1	1	1	1	1	1	1	1	1	1	1	1	1	1	1	1	1	1	1	1	1	1	1	1	49.7	1.1
E9PQD0;E9PS30;E9PLI6;E9PS76;Q8N9N8	E9PQD0;E9PS30;E9PLI6;E9PS76;Q8N9N8	2;2;2;2;2	2;2;2;2;2	2;2;2;2;2	Probable RNA-binding protein EIF1AD	EIF1AD	tr|E9PQD0|E9PQD0_HUMAN Probable RNA-binding protein EIF1AD OS=Homo sapiens GN=EIF1AD PE=1 SV=1;tr|E9PS30|E9PS30_HUMAN Probable RNA-binding protein EIF1AD (Fragment) OS=Homo sapiens GN=EIF1AD PE=1 SV=1;tr|E9PLI6|E9PLI6_HUMAN Probable RNA-binding protein EIF	5	2	2	2	2	2	2	1	2	2	2	2	2	1	2	2	2	2	2	1	2	2	2	2	2	1	2	2	2	2	2	1	2	2	2	2	2	1	2	2	51.6	51.6
E9PLL6;P46776;E9PJD9;E9PLX7	E9PLL6;P46776;E9PJD9	6;6;5;2	6;6;5;2	6;6;5;2	60S ribosomal protein L27a	RPL27A	tr|E9PLL6|E9PLL6_HUMAN 60S ribosomal protein L27a OS=Homo sapiens GN=RPL27A PE=1 SV=1;sp|P46776|RL27A_HUMAN 60S ribosomal protein L27a OS=Homo sapiens GN=RPL27A PE=1 SV=2;tr|E9PJD9|E9PJD9_HUMAN 60S ribosomal protein L27a OS=Homo sapiens GN=RPL27A PE=1 SV=1	4	6	6	6	4	5	5	6	6	5	6	5	5	5	5	4	4	5	5	6	6	5	6	5	5	5	5	4	4	5	5	6	6	5	6	5	5	5	5	4	40.7	40.7
E9PLT2	E9PLT2	11	2	2		UBTF	tr|E9PLT2|E9PLT2_HUMAN Nucleolar transcription factor 1 (Fragment) OS=Homo sapiens GN=UBTF PE=1 SV=1	1	11	2	2	11	11	11	11	11	11	11	11	11	11	11	11	2	2	2	2	2	2	2	2	2	2	2	2	2	2	2	2	2	2	2	2	2	2	2	2	53.1	4.1
E9PRZ9;E9PM92;O00193	E9PRZ9;E9PM92;O00193	2;2;2	2;2;2	2;2;2	Small acidic protein	C11orf58;SMAP	tr|E9PRZ9|E9PRZ9_HUMAN Small acidic protein (Fragment) OS=Homo sapiens GN=C11orf58 PE=1 SV=1;tr|E9PM92|E9PM92_HUMAN Small acidic protein OS=Homo sapiens GN=C11orf58 PE=1 SV=2;sp|O00193|SMAP_HUMAN Small acidic protein OS=Homo sapiens GN=SMAP PE=1 SV=1	3	2	2	2	2	2	2	2	2	2	2	2	1	2	2	2	2	2	2	2	2	2	2	2	1	2	2	2	2	2	2	2	2	2	2	2	1	2	2	2	25.6	25.6
E9PPH5;Q9BTT0	E9PPH5;Q9BTT0	2;2	2;2	2;2	Acidic leucine-rich nuclear phosphoprotein 32 family member E	ANP32E	tr|E9PPH5|E9PPH5_HUMAN Acidic leucine-rich nuclear phosphoprotein 32 family member E (Fragment) OS=Homo sapiens GN=ANP32E PE=1 SV=1;sp|Q9BTT0|AN32E_HUMAN Acidic leucine-rich nuclear phosphoprotein 32 family member E OS=Homo sapiens GN=ANP32E PE=1 SV=1	2	2	2	2	2	2	2	1	1	1	1	1	1	1	1	1	2	2	2	1	1	1	1	1	1	1	1	1	2	2	2	1	1	1	1	1	1	1	1	1	24.6	24.6
E9PQY2;Q9NQP4	E9PQY2;Q9NQP4	2;2	2;2	2;2	Prefoldin subunit 4	PFDN4	tr|E9PQY2|E9PQY2_HUMAN Prefoldin subunit 4 OS=Homo sapiens GN=PFDN4 PE=1 SV=1;sp|Q9NQP4|PFD4_HUMAN Prefoldin subunit 4 OS=Homo sapiens GN=PFDN4 PE=1 SV=1	2	2	2	2	0	1	0	1	1	1	0	1	1	1	1	1	0	1	0	1	1	1	0	1	1	1	1	1	0	1	0	1	1	1	0	1	1	1	1	1	20.6	20.6
E9PR30;P62861	E9PR30;P62861	2;2	2;2	2;2	40S ribosomal protein S30	FAU	tr|E9PR30|E9PR30_HUMAN 40S ribosomal protein S30 OS=Homo sapiens GN=FAU PE=1 SV=1;sp|P62861|RS30_HUMAN 40S ribosomal protein S30 OS=Homo sapiens GN=FAU PE=1 SV=1	2	2	2	2	2	2	2	2	2	2	2	2	2	2	1	2	2	2	2	2	2	2	2	2	2	2	1	2	2	2	2	2	2	2	2	2	2	2	1	2	11.2	11.2
F2Z393;P37837	F2Z393;P37837	1;1	1;1	1;1	Transaldolase	TALDO1	tr|F2Z393|F2Z393_HUMAN Transaldolase OS=Homo sapiens GN=TALDO1 PE=1 SV=1;sp|P37837|TALDO_HUMAN Transaldolase OS=Homo sapiens GN=TALDO1 PE=1 SV=2	2	1	1	1	0	0	0	0	0	0	0	0	1	1	0	1	0	0	0	0	0	0	0	0	1	1	0	1	0	0	0	0	0	0	0	0	1	1	0	1	3.5	3.5
F5GY37;J3KPX7;Q99623;F5H3X6;F5GWA7;F5H2D2;F5H0C5	F5GY37;J3KPX7;Q99623;F5H3X6;F5GWA7	5;5;5;4;3;1;1	5;5;5;4;3;1;1	5;5;5;4;3;1;1	Prohibitin-2	PHB2	tr|F5GY37|F5GY37_HUMAN Prohibitin-2 OS=Homo sapiens GN=PHB2 PE=1 SV=1;tr|J3KPX7|J3KPX7_HUMAN Prohibitin-2 OS=Homo sapiens GN=PHB2 PE=1 SV=2;sp|Q99623|PHB2_HUMAN Prohibitin-2 OS=Homo sapiens GN=PHB2 PE=1 SV=2;tr|F5H3X6|F5H3X6_HUMAN Prohibitin-2 (Fragment) O	7	5	5	5	3	2	3	1	3	2	4	3	4	1	2	1	3	2	3	1	3	2	4	3	4	1	2	1	3	2	3	1	3	2	4	3	4	1	2	1	24.7	24.7
F5GY90;F5H226;F5H345;P08397;F5H4W5;F5H4X2;F5H0P4	F5GY90;F5H226;F5H345;P08397;F5H4W5;F5H4X2;F5H0P4	2;2;2;2;1;1;1	2;2;2;2;1;1;1	2;2;2;2;1;1;1	Porphobilinogen deaminase	HMBS	tr|F5GY90|F5GY90_HUMAN Porphobilinogen deaminase (Fragment) OS=Homo sapiens GN=HMBS PE=1 SV=1;tr|F5H226|F5H226_HUMAN Porphobilinogen deaminase (Fragment) OS=Homo sapiens GN=HMBS PE=1 SV=1;tr|F5H345|F5H345_HUMAN Porphobilinogen deaminase OS=Homo sapiens GN=	7	2	2	2	2	2	2	2	1	2	2	2	1	2	2	2	2	2	2	2	1	2	2	2	1	2	2	2	2	2	2	2	1	2	2	2	1	2	2	2	15	15
F5GYN4;J3KR44;F5GYJ8;Q96FW1;F5H3F0;F5H6Q1	F5GYN4;J3KR44;F5GYJ8;Q96FW1;F5H3F0;F5H6Q1	2;2;2;2;1;1	2;2;2;2;1;1	2;2;2;2;1;1	Ubiquitin thioesterase OTUB1	OTUB1	tr|F5GYN4|F5GYN4_HUMAN Ubiquitin thioesterase OTUB1 OS=Homo sapiens GN=OTUB1 PE=1 SV=1;tr|J3KR44|J3KR44_HUMAN Ubiquitin thioesterase OTUB1 OS=Homo sapiens GN=OTUB1 PE=1 SV=2;tr|F5GYJ8|F5GYJ8_HUMAN Ubiquitin thioesterase OTUB1 OS=Homo sapiens GN=OTUB1 PE=1	6	2	2	2	2	1	2	1	2	1	1	1	1	2	2	1	2	1	2	1	2	1	1	1	1	2	2	1	2	1	2	1	2	1	1	1	1	2	2	1	10	10
F5GZ78;P49023;H0YIE4;F5H836	F5GZ78;P49023	3;3;1;1	3;3;1;1	3;3;1;1	Paxillin	PXN	tr|F5GZ78|F5GZ78_HUMAN Paxillin OS=Homo sapiens GN=PXN PE=1 SV=1;sp|P49023|PAXI_HUMAN Paxillin OS=Homo sapiens GN=PXN PE=1 SV=3	4	3	3	3	2	2	2	2	1	2	1	3	2	2	2	1	2	2	2	2	1	2	1	3	2	2	2	1	2	2	2	2	1	2	1	3	2	2	2	1	6.6	6.6
F5H867;F5H0E2;H0YFS2;F5GZS6;J3KPF3;P08195	F5H867;F5H0E2;H0YFS2;F5GZS6;J3KPF3;P08195	1;1;1;1;1;1	1;1;1;1;1;1	1;1;1;1;1;1	4F2 cell-surface antigen heavy chain	SLC3A2	tr|F5H867|F5H867_HUMAN 4F2 cell-surface antigen heavy chain (Fragment) OS=Homo sapiens GN=SLC3A2 PE=1 SV=1;tr|F5H0E2|F5H0E2_HUMAN 4F2 cell-surface antigen heavy chain (Fragment) OS=Homo sapiens GN=SLC3A2 PE=1 SV=1;tr|H0YFS2|H0YFS2_HUMAN 4F2 cell-surface an	6	1	1	1	1	1	1	1	1	0	1	1	1	0	1	0	1	1	1	1	1	0	1	1	1	0	1	0	1	1	1	1	1	0	1	1	1	0	1	0	9.6	9.6
F5H0C8;P09104;U3KQP4	F5H0C8;P09104	4;4;1	3;3;1	3;3;1	Enolase;Gamma-enolase	ENO2	tr|F5H0C8|F5H0C8_HUMAN Gamma-enolase OS=Homo sapiens GN=ENO2 PE=1 SV=1;sp|P09104|ENOG_HUMAN Gamma-enolase OS=Homo sapiens GN=ENO2 PE=1 SV=3	3	4	3	3	4	3	4	3	3	3	1	4	3	3	3	3	3	2	3	2	2	2	0	3	2	2	2	2	3	2	3	2	2	2	0	3	2	2	2	2	18.7	13
F5H2F4;P11586	F5H2F4;P11586	5;5	5;5	5;5	C-1-tetrahydrofolate synthase, cytoplasmic;Methylenetetrahydrofolate dehydrogenase;Methenyltetrahydrofolate cyclohydrolase;Formyltetrahydrofolate synthetase;C-1-tetrahydrofolate synthase, cytoplasmic, N-terminally processed	MTHFD1	tr|F5H2F4|F5H2F4_HUMAN C-1-tetrahydrofolate synthase, cytoplasmic OS=Homo sapiens GN=MTHFD1 PE=1 SV=1;sp|P11586|C1TC_HUMAN C-1-tetrahydrofolate synthase, cytoplasmic OS=Homo sapiens GN=MTHFD1 PE=1 SV=3	2	5	5	5	4	2	3	2	4	4	3	4	2	4	2	3	4	2	3	2	4	4	3	4	2	4	2	3	4	2	3	2	4	4	3	4	2	4	2	3	6.2	6.2
F5H442;Q99816	F5H442;Q99816	3;3	3;3	3;3	Tumor susceptibility gene 101 protein	TSG101	tr|F5H442|F5H442_HUMAN Tumor susceptibility gene 101 protein OS=Homo sapiens GN=TSG101 PE=1 SV=1;sp|Q99816|TS101_HUMAN Tumor susceptibility gene 101 protein OS=Homo sapiens GN=TSG101 PE=1 SV=2	2	3	3	3	0	1	1	1	1	2	2	3	0	2	2	2	0	1	1	1	1	2	2	3	0	2	2	2	0	1	1	1	1	2	2	3	0	2	2	2	9.3	9.3
F5H669;Q8N684;J3QT54;F5H6M0;F5H047;C9J286;C9J323	F5H669;Q8N684;J3QT54;F5H6M0;F5H047	4;4;3;3;3;1;1	4;4;3;3;3;1;1	4;4;3;3;3;1;1	Cleavage and polyadenylation specificity factor subunit 7	CPSF7	tr|F5H669|F5H669_HUMAN Cleavage and polyadenylation-specificity factor subunit 7 (Fragment) OS=Homo sapiens GN=CPSF7 PE=1 SV=1;sp|Q8N684|CPSF7_HUMAN Cleavage and polyadenylation specificity factor subunit 7 OS=Homo sapiens GN=CPSF7 PE=1 SV=1;tr|J3QT54|J3QT	7	4	4	4	2	2	2	1	2	2	3	3	2	3	1	2	2	2	2	1	2	2	3	3	2	3	1	2	2	2	2	1	2	2	3	3	2	3	1	2	11.5	11.5
F5H7W8;Q96C57;F5H3K2;E7ENF1;G5EA44;F5H8B7	F5H7W8;Q96C57;F5H3K2;E7ENF1;G5EA44;F5H8B7	7;7;6;6;5;4	7;7;6;6;5;4	7;7;6;6;5;4	Uncharacterized protein C12orf43	C12orf43	tr|F5H7W8|F5H7W8_HUMAN Chromosome 12 open reading frame 43, isoform CRA_a OS=Homo sapiens GN=C12orf43 PE=1 SV=2;sp|Q96C57|CL043_HUMAN Uncharacterized protein C12orf43 OS=Homo sapiens GN=C12orf43 PE=1 SV=2;tr|F5H3K2|F5H3K2_HUMAN Uncharacterized protein C12o	6	7	7	7	4	5	4	3	5	4	5	5	3	7	6	5	4	5	4	3	5	4	5	5	3	7	6	5	4	5	4	3	5	4	5	5	3	7	6	5	38.6	38.6
H3BTB3;H3BMQ5;H3BN59;I3L0H8;F6QDS0;H3BQK0;Q9NUU7;Q9UMR2	H3BTB3;H3BMQ5;H3BN59;I3L0H8;F6QDS0;H3BQK0;Q9NUU7;Q9UMR2	1;1;1;1;1;1;1;1	1;1;1;1;1;1;1;1	1;1;1;1;1;1;1;1	ATP-dependent RNA helicase DDX19A;ATP-dependent RNA helicase DDX19B	DDX19A;DDX19B	tr|H3BTB3|H3BTB3_HUMAN ATP-dependent RNA helicase DDX19A OS=Homo sapiens GN=DDX19A PE=1 SV=1;tr|H3BMQ5|H3BMQ5_HUMAN ATP-dependent RNA helicase DDX19B (Fragment) OS=Homo sapiens GN=DDX19B PE=1 SV=1;tr|H3BN59|H3BN59_HUMAN Uncharacterized protein (Fragment) O	8	1	1	1	1	1	0	1	0	0	1	0	0	1	0	1	1	1	0	1	0	0	1	0	0	1	0	1	1	1	0	1	0	0	1	0	0	1	0	1	11.6	11.6
F6TLX2;I3L1I0	F6TLX2	16;3	16;3	0;0		GLOD4	tr|F6TLX2|F6TLX2_HUMAN Glyoxalase domain-containing protein 4 OS=Homo sapiens GN=GLOD4 PE=1 SV=1	2	16	16	0	13	14	12	13	14	15	13	16	13	14	13	14	13	14	12	13	14	15	13	16	13	14	13	14	0	0	0	0	0	0	0	0	0	0	0	0	37.5	37.5
F8VPD4;P27708	F8VPD4;P27708	3;3	3;3	3;3	CAD protein;Glutamine-dependent carbamoyl-phosphate synthase;Aspartate carbamoyltransferase;Dihydroorotase	CAD	tr|F8VPD4|F8VPD4_HUMAN CAD protein OS=Homo sapiens GN=CAD PE=1 SV=1;sp|P27708|PYR1_HUMAN CAD protein OS=Homo sapiens GN=CAD PE=1 SV=3	2	3	3	3	3	3	2	3	2	2	2	2	3	3	1	2	3	3	2	3	2	2	2	2	3	3	1	2	3	3	2	3	2	2	2	2	3	3	1	2	1.8	1.8
F8VSC4;G3V1U3;P50579;F8VY03;F8VRR3;F8VQZ7	F8VSC4;G3V1U3;P50579;F8VY03;F8VRR3;F8VQZ7	2;2;2;1;1;1	2;2;2;1;1;1	2;2;2;1;1;1	Methionine aminopeptidase 2	METAP2	tr|F8VSC4|F8VSC4_HUMAN Methionine aminopeptidase 2 (Fragment) OS=Homo sapiens GN=METAP2 PE=1 SV=1;tr|G3V1U3|G3V1U3_HUMAN Methionine aminopeptidase OS=Homo sapiens GN=METAP2 PE=1 SV=1;sp|P50579|MAP2_HUMAN Methionine aminopeptidase 2 OS=Homo sapiens GN=METAP	6	2	2	2	1	2	2	2	2	2	2	2	2	2	2	2	1	2	2	2	2	2	2	2	2	2	2	2	1	2	2	2	2	2	2	2	2	2	2	2	22.4	22.4
F8W118;F8VV59;F8VY35;F5H4R6;H0YIV4;P55209;F8VRJ2;H0YH88;F8W543;B7Z9C2;H0YHC3;F8W020;F8VXI6;F8VUX1;F8W0J6;F8VVB5;A8MXH2	F8W118;F8VV59;F8VY35;F5H4R6;H0YIV4;P55209;F8VRJ2;H0YH88;F8W543;B7Z9C2;H0YHC3;F8W020;F8VXI6;F8VUX1;F8W0J6	8;8;7;7;7;7;6;6;6;6;5;5;5;5;5;2;1	8;8;7;7;7;7;6;6;6;6;5;5;5;5;5;2;1	7;7;6;6;6;6;5;5;5;5;4;4;4;4;4;1;0	Nucleosome assembly protein 1-like 1	NAP1L1	tr|F8W118|F8W118_HUMAN Nucleosome assembly protein 1-like 1 (Fragment) OS=Homo sapiens GN=NAP1L1 PE=1 SV=1;tr|F8VV59|F8VV59_HUMAN Nucleosome assembly protein 1-like 1 OS=Homo sapiens GN=NAP1L1 PE=1 SV=1;tr|F8VY35|F8VY35_HUMAN Nucleosome assembly protein 1-	17	8	8	7	5	6	7	6	6	6	6	7	7	7	6	6	5	6	7	6	6	6	6	7	7	7	6	6	4	5	6	5	5	5	5	6	6	6	5	5	54.1	54.1
F8VWS0;P05388;G3V210;F8VU65;F8VQY6;F8VPE8;F8VRK7;Q8NHW5;F8VS58;F8VW21;F8VZS0;F8VWV4;F8W1K8	F8VWS0;P05388;G3V210;F8VU65;F8VQY6;F8VPE8;F8VRK7;Q8NHW5;F8VS58;F8VW21;F8VZS0	6;6;5;5;4;4;4;4;3;3;3;2;1	6;6;5;5;4;4;4;4;3;3;3;2;1	6;6;5;5;4;4;4;4;3;3;3;2;1	60S acidic ribosomal protein P0;60S acidic ribosomal protein P0-like	RPLP0;RPLP0P6	tr|F8VWS0|F8VWS0_HUMAN 60S acidic ribosomal protein P0 OS=Homo sapiens GN=RPLP0 PE=1 SV=1;sp|P05388|RLA0_HUMAN 60S acidic ribosomal protein P0 OS=Homo sapiens GN=RPLP0 PE=1 SV=1;tr|G3V210|G3V210_HUMAN 60S acidic ribosomal protein P0 OS=Homo sapiens GN=RPLP	13	6	6	6	5	4	3	3	3	3	5	5	3	4	2	2	5	4	3	3	3	3	5	5	3	4	2	2	5	4	3	3	3	3	5	5	3	4	2	2	34.2	34.2
G3V213;F8VZG5;F8W1A4;P54819	G3V213;F8VZG5;F8W1A4;P54819	1;1;1;1	1;1;1;1	1;1;1;1	Adenylate kinase 2, mitochondrial;Adenylate kinase 2, mitochondrial;Adenylate kinase 2, mitochondrial, N-terminally processed	AK2	tr|G3V213|G3V213_HUMAN Adenylate kinase 2, isoform CRA_a OS=Homo sapiens GN=AK2 PE=1 SV=1;tr|F8VZG5|F8VZG5_HUMAN Adenylate kinase 2, mitochondrial OS=Homo sapiens GN=AK2 PE=1 SV=1;tr|F8W1A4|F8W1A4_HUMAN Adenylate kinase 2, mitochondrial OS=Homo sapiens GN=	4	1	1	1	0	0	0	0	1	0	1	1	0	0	0	0	0	0	0	0	1	0	1	1	0	0	0	0	0	0	0	0	1	0	1	1	0	0	0	0	9.8	9.8
H3BRU6;F8VZX2;Q15366;F8W0G4;F8VXH9;F8W1G6;H3BND9;J3QT27;E9PFP8;P57721;F8VTZ0;H3BSS4;F8VRH0	H3BRU6;F8VZX2;Q15366;F8W0G4;F8VXH9;F8W1G6	5;5;5;4;4;4;2;2;2;2;1;1;1	5;5;5;4;4;4;2;2;2;2;1;1;1	4;4;4;3;3;3;2;1;1;1;0;1;1	Poly(rC)-binding protein 2	PCBP2	tr|H3BRU6|H3BRU6_HUMAN Poly(rC)-binding protein 2 (Fragment) OS=Homo sapiens GN=PCBP2 PE=1 SV=1;tr|F8VZX2|F8VZX2_HUMAN Poly(rC)-binding protein 2 OS=Homo sapiens GN=PCBP2 PE=1 SV=1;sp|Q15366|PCBP2_HUMAN Poly(rC)-binding protein 2 OS=Homo sapiens GN=PCBP2 P	13	5	5	4	5	3	3	2	4	4	5	4	4	5	5	4	5	3	3	2	4	4	5	4	4	5	5	4	4	2	2	1	3	3	4	3	3	4	4	3	23.9	23.9
F8W6I7;P09651;F8VZ49;Q32P51;F8VTQ5;F8VYN5;H0YH80;F8W646	F8W6I7;P09651;F8VZ49;Q32P51;F8VTQ5	11;11;9;8;6;5;5;4	11;11;9;8;6;5;5;4	10;10;8;7;5;4;5;4	Heterogeneous nuclear ribonucleoprotein A1;Heterogeneous nuclear ribonucleoprotein A1, N-terminally processed;Heterogeneous nuclear ribonucleoprotein A1-like 2	HNRNPA1;HNRNPA1L2	tr|F8W6I7|F8W6I7_HUMAN Heterogeneous nuclear ribonucleoprotein A1 OS=Homo sapiens GN=HNRNPA1 PE=1 SV=2;sp|P09651|ROA1_HUMAN Heterogeneous nuclear ribonucleoprotein A1 OS=Homo sapiens GN=HNRNPA1 PE=1 SV=5;tr|F8VZ49|F8VZ49_HUMAN Heterogeneous nuclear ribonuc	8	11	11	10	8	9	10	7	9	9	9	8	8	9	8	9	8	9	10	7	9	9	9	8	8	9	8	9	7	8	9	6	8	8	8	7	7	8	7	8	49.2	49.2
F8W7C6;A0A087WV22;X1WI28;P27635;H7C123;H7C2C5;Q96L21;B8A6G2;A6QRI9	F8W7C6;A0A087WV22;X1WI28;P27635;H7C123;H7C2C5	7;6;6;6;4;4;3;1;1	7;6;6;6;4;4;3;1;1	7;6;6;6;4;4;3;1;1	60S ribosomal protein L10	RPL10	tr|F8W7C6|F8W7C6_HUMAN 60S ribosomal protein L10 OS=Homo sapiens GN=RPL10 PE=1 SV=2;tr|A0A087WV22|A0A087WV22_HUMAN 60S ribosomal protein L10 OS=Homo sapiens GN=RPL10 PE=1 SV=1;tr|X1WI28|X1WI28_HUMAN 60S ribosomal protein L10 (Fragment) OS=Homo sapiens GN=R	9	7	7	7	7	7	6	7	6	6	6	7	6	7	7	6	7	7	6	7	6	6	6	7	6	7	7	6	7	7	6	7	6	6	6	7	6	7	7	6	49.1	49.1
F8WCT1;F5GYV5;A0A0C4DG62;H7BZV4;A0A0C4DH18;F5H7X4;F8WEP2	F8WCT1;F5GYV5;A0A0C4DG62;H7BZV4;A0A0C4DH18;F5H7X4	7;6;6;5;4;4;3	7;6;6;5;4;4;3	1;1;0;0;1;0;0		ARL6IP4	tr|F8WCT1|F8WCT1_HUMAN ADP-ribosylation factor-like protein 6-interacting protein 4 OS=Homo sapiens GN=ARL6IP4 PE=1 SV=1;tr|F5GYV5|F5GYV5_HUMAN ADP-ribosylation factor-like protein 6-interacting protein 4 (Fragment) OS=Homo sapiens GN=ARL6IP4 PE=1 SV=1;tr|	7	7	7	1	7	7	7	6	7	7	7	6	7	7	7	7	7	7	7	6	7	7	7	6	7	7	7	7	1	1	1	1	1	1	1	1	1	1	1	1	33.2	33.2
F8WF32;P04843	F8WF32;P04843	1;1	1;1	1;1	Dolichyl-diphosphooligosaccharide--protein glycosyltransferase subunit 1	RPN1	tr|F8WF32|F8WF32_HUMAN Dolichyl-diphosphooligosaccharide--protein glycosyltransferase subunit 1 OS=Homo sapiens GN=RPN1 PE=1 SV=1;sp|P04843|RPN1_HUMAN Dolichyl-diphosphooligosaccharide--protein glycosyltransferase subunit 1 OS=Homo sapiens GN=RPN1 PE=1 SV=	2	1	1	1	1	0	1	0	0	0	1	1	0	0	0	1	1	0	1	0	0	0	1	1	0	0	0	1	1	0	1	0	0	0	1	1	0	0	0	1	9.9	9.9
F8WF69;P09496	F8WF69;P09496	1;1	1;1	1;1	Clathrin light chain A	CLTA	tr|F8WF69|F8WF69_HUMAN Clathrin light chain A OS=Homo sapiens GN=CLTA PE=1 SV=1;sp|P09496|CLCA_HUMAN Clathrin light chain A OS=Homo sapiens GN=CLTA PE=1 SV=1	2	1	1	1	0	0	1	0	0	0	0	0	0	0	0	0	0	0	1	0	0	0	0	0	0	0	0	0	0	0	1	0	0	0	0	0	0	0	0	0	3.5	3.5
F8WJN3;Q16630;F8W084	F8WJN3;Q16630	14;14;2	14;14;2	14;14;2	Cleavage and polyadenylation specificity factor subunit 6	CPSF6	tr|F8WJN3|F8WJN3_HUMAN Cleavage and polyadenylation-specificity factor subunit 6 OS=Homo sapiens GN=CPSF6 PE=1 SV=1;sp|Q16630|CPSF6_HUMAN Cleavage and polyadenylation specificity factor subunit 6 OS=Homo sapiens GN=CPSF6 PE=1 SV=2	3	14	14	14	12	12	10	12	12	12	13	13	12	12	13	11	12	12	10	12	12	12	13	13	12	12	13	11	12	12	10	12	12	12	13	13	12	12	13	11	34.5	34.5
G3V3G9;Q5TAQ9;V9GY54;Q5TAQ8;V9GZ39;V9GYZ9;V9GYQ9;A6NGE4;P0C7V8	G3V3G9;Q5TAQ9;V9GY54	13;13;9;4;2;2;1;1;1	13;13;9;4;2;2;1;1;1	13;13;9;4;2;2;1;1;1	DDB1- and CUL4-associated factor 8	DCAF8	tr|G3V3G9|G3V3G9_HUMAN Uncharacterized protein OS=Homo sapiens PE=4 SV=1;sp|Q5TAQ9|DCAF8_HUMAN DDB1- and CUL4-associated factor 8 OS=Homo sapiens GN=DCAF8 PE=1 SV=1;tr|V9GY54|V9GY54_HUMAN DDB1- and CUL4-associated factor 8 OS=Homo sapiens GN=DCAF8 PE=1 SV=	9	13	13	13	11	8	11	8	9	9	5	8	6	8	9	8	11	8	11	8	9	9	5	8	6	8	9	8	11	8	11	8	9	9	5	8	6	8	9	8	23.7	23.7
G3V3T3	G3V3T3	9	1	1		ACIN1	tr|G3V3T3|G3V3T3_HUMAN Apoptotic chromatin condensation inducer in the nucleus (Fragment) OS=Homo sapiens GN=ACIN1 PE=1 SV=1	1	9	1	1	9	9	9	9	9	9	9	9	9	9	9	9	1	1	1	1	1	1	1	1	1	1	1	1	1	1	1	1	1	1	1	1	1	1	1	1	67.5	6.2
G3V4Y7;Q86UP2;H0YJV5;H0YJZ8;G3V5G2	G3V4Y7;Q86UP2	3;3;1;1;1	3;3;1;1;1	3;3;1;1;1	Kinectin	KTN1	tr|G3V4Y7|G3V4Y7_HUMAN Kinectin OS=Homo sapiens GN=KTN1 PE=1 SV=1;sp|Q86UP2|KTN1_HUMAN Kinectin OS=Homo sapiens GN=KTN1 PE=1 SV=1	5	3	3	3	1	1	1	1	3	3	3	3	3	2	2	2	1	1	1	1	3	3	3	3	3	2	2	2	1	1	1	1	3	3	3	3	3	2	2	2	6.1	6.1
G3XAI9;Q5BKY9;Q8N9E0;C9JUX2	G3XAI9;Q5BKY9;Q8N9E0	7;7;4;2	7;7;4;2	7;7;4;2	Protein FAM133B;Protein FAM133A	FAM133B;FAM133A	tr|G3XAI9|G3XAI9_HUMAN Protein FAM133B OS=Homo sapiens GN=FAM133B PE=1 SV=1;sp|Q5BKY9|F133B_HUMAN Protein FAM133B OS=Homo sapiens GN=FAM133B PE=1 SV=1;sp|Q8N9E0|F133A_HUMAN Protein FAM133A OS=Homo sapiens GN=FAM133A PE=1 SV=1	4	7	7	7	6	6	5	6	7	6	7	6	6	6	6	6	6	6	5	6	7	6	7	6	6	6	6	6	6	6	5	6	7	6	7	6	6	6	6	6	51.4	51.4
G3XAM7;P35221;E5RIB1;E5RHV7;E5RGY6;E5RG03;A0A0A0MRI5;E5RJL0;E5RIE0;E5RJ41;A0A0A0MTJ6;E5RFM3;H0YBB8	G3XAM7;P35221	11;11;4;3;3;3;3;2;2;2;2;1;1	11;11;4;3;3;3;3;2;2;2;2;1;1	6;6;3;2;2;2;0;1;1;2;0;1;0	Catenin alpha-1	CTNNA1	tr|G3XAM7|G3XAM7_HUMAN Catenin (Cadherin-associated protein), alpha 1, 102kDa, isoform CRA_a OS=Homo sapiens GN=CTNNA1 PE=1 SV=1;sp|P35221|CTNA1_HUMAN Catenin alpha-1 OS=Homo sapiens GN=CTNNA1 PE=1 SV=1	13	11	11	6	7	10	9	10	10	10	10	10	8	10	8	10	7	10	9	10	10	10	10	10	8	10	8	10	3	5	5	5	6	5	6	6	4	5	4	5	17.6	17.6
H0Y2V6;Q5SW79;H0YB92	H0Y2V6;Q5SW79	3;3;1	3;3;1	3;3;1	Centrosomal protein of 170 kDa	CEP170	tr|H0Y2V6|H0Y2V6_HUMAN Centrosomal protein of 170 kDa (Fragment) OS=Homo sapiens GN=CEP170 PE=1 SV=1;sp|Q5SW79|CE170_HUMAN Centrosomal protein of 170 kDa OS=Homo sapiens GN=CEP170 PE=1 SV=1	3	3	3	3	1	2	1	1	1	1	1	1	2	3	3	3	1	2	1	1	1	1	1	1	2	3	3	3	1	2	1	1	1	1	1	1	2	3	3	3	3.5	3.5
H0Y7U8;H0Y470;H7C2C6;Q3V6T2	H0Y7U8;H0Y470;H7C2C6;Q3V6T2	2;2;2;2	2;2;2;2	2;2;2;2	Girdin	CCDC88A	tr|H0Y7U8|H0Y7U8_HUMAN Girdin (Fragment) OS=Homo sapiens GN=CCDC88A PE=1 SV=7;tr|H0Y470|H0Y470_HUMAN Girdin (Fragment) OS=Homo sapiens GN=CCDC88A PE=1 SV=1;tr|H7C2C6|H7C2C6_HUMAN Girdin (Fragment) OS=Homo sapiens GN=CCDC88A PE=1 SV=1;sp|Q3V6T2|GRDN_HUMAN G	4	2	2	2	1	1	0	1	2	1	2	1	2	1	1	2	1	1	0	1	2	1	2	1	2	1	1	2	1	1	0	1	2	1	2	1	2	1	1	2	3.4	3.4
H0Y4R1;P12268;E7ETK5	H0Y4R1;P12268;E7ETK5	6;6;3	6;6;3	6;6;3	Inosine-5-monophosphate dehydrogenase 2	IMPDH2	tr|H0Y4R1|H0Y4R1_HUMAN Inosine-5-monophosphate dehydrogenase 2 (Fragment) OS=Homo sapiens GN=IMPDH2 PE=1 SV=1;sp|P12268|IMDH2_HUMAN Inosine-5-monophosphate dehydrogenase 2 OS=Homo sapiens GN=IMPDH2 PE=1 SV=2;tr|E7ETK5|E7ETK5_HUMAN Inosine-5-monophosphat	3	6	6	6	5	5	5	5	4	5	5	4	5	3	4	3	5	5	5	5	4	5	5	4	5	3	4	3	5	5	5	5	4	5	5	4	5	3	4	3	19.4	19.4
H3BNC1;H3BR27;H0Y6E7;H3BT71;Q96E39;P38159	H3BNC1;H3BR27;H0Y6E7;H3BT71;Q96E39;P38159	1;1;1;1;1;1	1;1;1;1;1;1	1;1;1;1;1;1	RNA binding motif protein, X-linked-like-1;RNA-binding motif protein, X chromosome;RNA-binding motif protein, X chromosome, N-terminally processed	RBMX;RBMXL1	tr|H3BNC1|H3BNC1_HUMAN RNA-binding motif protein, X chromosome OS=Homo sapiens GN=RBMX PE=1 SV=1;tr|H3BR27|H3BR27_HUMAN RNA-binding motif protein, X chromosome OS=Homo sapiens GN=RBMX PE=1 SV=1;tr|H0Y6E7|H0Y6E7_HUMAN RNA-binding motif protein, X chromosome	6	1	1	1	1	1	1	0	1	0	1	0	1	1	1	1	1	1	1	0	1	0	1	0	1	1	1	1	1	1	1	0	1	0	1	0	1	1	1	1	35.1	35.1
H0Y6I0;Q13439;C9JHJ5;A0A087WTW2;E7EVX2	H0Y6I0;Q13439;C9JHJ5	16;16;9;1;1	15;15;9;1;1	15;15;9;1;1	Golgin subfamily A member 4	GOLGA4	tr|H0Y6I0|H0Y6I0_HUMAN Golgin subfamily A member 4 (Fragment) OS=Homo sapiens GN=GOLGA4 PE=1 SV=1;sp|Q13439|GOGA4_HUMAN Golgin subfamily A member 4 OS=Homo sapiens GN=GOLGA4 PE=1 SV=1;tr|C9JHJ5|C9JHJ5_HUMAN Golgin subfamily A member 4 (Fragment) OS=Homo sa	5	16	15	15	12	12	12	10	11	11	10	10	10	9	9	13	11	11	11	9	10	10	9	9	9	8	8	12	11	11	11	9	10	10	9	9	9	8	8	12	8.5	8.1
H0Y7A7;P62158;E7ETZ0;E7EMB3;F8WBR5;M0QZ52;G3V479;G3V361;Q96HY3;G3V226;P27482;C9J7T9;P02585	H0Y7A7;P62158;E7ETZ0;E7EMB3;F8WBR5;M0QZ52;G3V479	9;9;8;8;6;6;6;3;3;2;2;1;1	9;9;8;8;6;6;6;3;3;2;2;1;1	9;9;8;8;6;6;6;3;3;2;2;1;1	Calmodulin	CALM2;CALM1;CALM3	tr|H0Y7A7|H0Y7A7_HUMAN Calmodulin (Fragment) OS=Homo sapiens GN=CALM2 PE=1 SV=1;sp|P62158|CALM_HUMAN Calmodulin OS=Homo sapiens GN=CALM1 PE=1 SV=2;tr|E7ETZ0|E7ETZ0_HUMAN Calmodulin OS=Homo sapiens GN=CALM1 PE=1 SV=1;tr|E7EMB3|E7EMB3_HUMAN Calmodulin OS=Hom	13	9	9	9	7	7	5	8	8	6	6	8	7	7	9	7	7	7	5	8	8	6	6	8	7	7	9	7	7	7	5	8	8	6	6	8	7	7	9	7	32.1	32.1
H0Y8C6;O00410;H0Y3V4	H0Y8C6;O00410;H0Y3V4	2;2;1	2;2;1	2;2;1	Importin-5	IPO5	tr|H0Y8C6|H0Y8C6_HUMAN Importin-5 (Fragment) OS=Homo sapiens GN=IPO5 PE=1 SV=1;sp|O00410|IPO5_HUMAN Importin-5 OS=Homo sapiens GN=IPO5 PE=1 SV=4;tr|H0Y3V4|H0Y3V4_HUMAN Importin-5 (Fragment) OS=Homo sapiens GN=IPO5 PE=1 SV=1	3	2	2	2	0	1	1	1	0	0	0	0	0	0	0	0	0	1	1	1	0	0	0	0	0	0	0	0	0	1	1	1	0	0	0	0	0	0	0	0	2.4	2.4
H0Y8E6;P49736	H0Y8E6;P49736	1;1	1;1	1;1	DNA replication licensing factor MCM2	MCM2	tr|H0Y8E6|H0Y8E6_HUMAN DNA helicase (Fragment) OS=Homo sapiens GN=MCM2 PE=1 SV=1;sp|P49736|MCM2_HUMAN DNA replication licensing factor MCM2 OS=Homo sapiens GN=MCM2 PE=1 SV=4	2	1	1	1	1	1	1	1	1	1	1	1	0	1	1	1	1	1	1	1	1	1	1	1	0	1	1	1	1	1	1	1	1	1	1	1	0	1	1	1	1.4	1.4
H0Y9X1;Q96EY4;D6RA57;D6RE67;D6RC31	H0Y9X1;Q96EY4;D6RA57;D6RE67;D6RC31	5;5;4;3;3	5;5;4;3;3	5;5;4;3;3	Translation machinery-associated protein 16	TMA16	tr|H0Y9X1|H0Y9X1_HUMAN Translation machinery-associated protein 16 (Fragment) OS=Homo sapiens GN=TMA16 PE=1 SV=1;sp|Q96EY4|TMA16_HUMAN Translation machinery-associated protein 16 OS=Homo sapiens GN=TMA16 PE=1 SV=2;tr|D6RA57|D6RA57_HUMAN Translation machine	5	5	5	5	4	5	4	4	3	4	3	4	3	4	5	4	4	5	4	4	3	4	3	4	3	4	5	4	4	5	4	4	3	4	3	4	3	4	5	4	21.1	21.1
H0YBI4;Q96HC4;H0Y8Y3;H0Y929;A0A0D9SFR4	H0YBI4;Q96HC4;H0Y8Y3	3;3;2;1;1	3;3;2;1;1	3;3;2;1;1	PDZ and LIM domain protein 5	PDLIM5	tr|H0YBI4|H0YBI4_HUMAN PDZ and LIM domain protein 5 (Fragment) OS=Homo sapiens GN=PDLIM5 PE=1 SV=1;sp|Q96HC4|PDLI5_HUMAN PDZ and LIM domain protein 5 OS=Homo sapiens GN=PDLIM5 PE=1 SV=5;tr|H0Y8Y3|H0Y8Y3_HUMAN PDZ and LIM domain protein 5 (Fragment) OS=Homo	5	3	3	3	2	2	2	3	2	2	2	2	2	2	2	2	2	2	2	3	2	2	2	2	2	2	2	2	2	2	2	3	2	2	2	2	2	2	2	2	18.9	18.9
H0YDU8;P53041;A8MU39	H0YDU8;P53041;A8MU39	5;5;3	5;5;3	5;5;3	Serine/threonine-protein phosphatase;Serine/threonine-protein phosphatase 5	PPP5C	tr|H0YDU8|H0YDU8_HUMAN Serine/threonine-protein phosphatase (Fragment) OS=Homo sapiens GN=PPP5C PE=1 SV=1;sp|P53041|PPP5_HUMAN Serine/threonine-protein phosphatase 5 OS=Homo sapiens GN=PPP5C PE=1 SV=1;tr|A8MU39|A8MU39_HUMAN Serine/threonine-protein phospha	3	5	5	5	4	4	4	4	3	4	3	4	4	4	3	4	4	4	4	4	3	4	3	4	4	4	3	4	4	4	4	4	3	4	3	4	4	4	3	4	11.5	11.5
H0YH81;P06576;F8W079	H0YH81;P06576;F8W079	2;2;1	2;2;1	2;2;1	ATP synthase subunit beta;ATP synthase subunit beta, mitochondrial	ATP5B	tr|H0YH81|H0YH81_HUMAN ATP synthase subunit beta (Fragment) OS=Homo sapiens GN=ATP5B PE=1 SV=1;sp|P06576|ATPB_HUMAN ATP synthase subunit beta, mitochondrial OS=Homo sapiens GN=ATP5B PE=1 SV=3;tr|F8W079|F8W079_HUMAN ATP synthase subunit beta, mitochondrial	3	2	2	2	1	0	1	0	0	0	2	2	0	0	0	0	1	0	1	0	0	0	2	2	0	0	0	0	1	0	1	0	0	0	2	2	0	0	0	0	8.6	8.6
H0YHD0;Q5PSV4	H0YHD0;Q5PSV4	3;3	3;3	3;3	Breast cancer metastasis-suppressor 1-like protein	BRMS1L	tr|H0YHD0|H0YHD0_HUMAN Breast cancer metastasis-suppressor 1-like protein (Fragment) OS=Homo sapiens GN=BRMS1L PE=1 SV=1;sp|Q5PSV4|BRM1L_HUMAN Breast cancer metastasis-suppressor 1-like protein OS=Homo sapiens GN=BRMS1L PE=1 SV=2	2	3	3	3	2	2	2	2	3	2	2	3	0	3	2	2	2	2	2	2	3	2	2	3	0	3	2	2	2	2	2	2	3	2	2	3	0	3	2	2	18.6	18.6
H0YIB4;Q13242;S4R3G0	H0YIB4;Q13242;S4R3G0	4;4;2	4;4;2	4;4;2	Serine/arginine-rich splicing factor 9	SRSF9	tr|H0YIB4|H0YIB4_HUMAN Serine/arginine-rich-splicing factor 9 (Fragment) OS=Homo sapiens GN=SRSF9 PE=1 SV=7;sp|Q13242|SRSF9_HUMAN Serine/arginine-rich splicing factor 9 OS=Homo sapiens GN=SRSF9 PE=1 SV=1;tr|S4R3G0|S4R3G0_HUMAN Serine/arginine-rich-splicing	3	4	4	4	2	3	2	2	3	4	2	3	3	2	2	4	2	3	2	2	3	4	2	3	3	2	2	4	2	3	2	2	3	4	2	3	3	2	2	4	38.2	38.2
H0YKD8;P46779;H0YMF4;H0YLP6	H0YKD8;P46779;H0YMF4;H0YLP6	9;9;7;6	9;9;7;6	9;9;7;6	60S ribosomal protein L28	RPL28	tr|H0YKD8|H0YKD8_HUMAN 60S ribosomal protein L28 OS=Homo sapiens GN=RPL28 PE=1 SV=1;sp|P46779|RL28_HUMAN 60S ribosomal protein L28 OS=Homo sapiens GN=RPL28 PE=1 SV=3;tr|H0YMF4|H0YMF4_HUMAN 60S ribosomal protein L28 OS=Homo sapiens GN=RPL28 PE=1 SV=1;tr|H0Y	4	9	9	9	8	7	8	7	8	9	8	8	7	8	8	7	8	7	8	7	8	9	8	8	7	8	8	7	8	7	8	7	8	9	8	8	7	8	8	7	41.2	41.2
H0YKP3;H0YL52;P09493;Q6ZN40;H0YKZ6;A0A087WTJ7	H0YKP3;H0YL52;P09493;Q6ZN40	6;6;6;5;1;1	1;1;1;0;1;1	1;1;1;0;1;1	Tropomyosin alpha-1 chain	TPM1	tr|H0YKP3|H0YKP3_HUMAN Tropomyosin alpha-1 chain OS=Homo sapiens GN=TPM1 PE=1 SV=1;tr|H0YL52|H0YL52_HUMAN Tropomyosin alpha-1 chain (Fragment) OS=Homo sapiens GN=TPM1 PE=1 SV=1;sp|P09493|TPM1_HUMAN Tropomyosin alpha-1 chain OS=Homo sapiens GN=TPM1 PE=1 SV=	6	6	1	1	6	6	5	6	5	5	5	6	5	6	6	5	1	1	1	1	1	1	1	1	1	1	1	0	1	1	1	1	1	1	1	1	1	1	1	0	35	7
H0YKS4;H0YMD0;H0YMU9;H0YN42;P07355;H0YN52;H0YNA0;H0YN28;H0YL33;H0YMM1;H0YNP5;H0YM50;A6NMY6;H0YLE2;H0YMD9;H0YKV8;H0YKL9;H0YKZ7;H0YLV6;H0YMT9;H0YKX9;H0YMW4	H0YKS4;H0YMD0;H0YMU9;H0YN42;P07355;H0YN52;H0YNA0;H0YN28;H0YL33;H0YMM1;H0YNP5;H0YM50;A6NMY6	3;3;3;3;3;2;2;2;2;2;2;2;2;1;1;1;1;1;1;1;1;1	3;3;3;3;3;2;2;2;2;2;2;2;2;1;1;1;1;1;1;1;1;1	3;3;3;3;3;2;2;2;2;2;2;2;2;1;1;1;1;1;1;1;1;1	Annexin;Annexin A2;Putative annexin A2-like protein	ANXA2;ANXA2P2	tr|H0YKS4|H0YKS4_HUMAN Annexin (Fragment) OS=Homo sapiens GN=ANXA2 PE=1 SV=1;tr|H0YMD0|H0YMD0_HUMAN Annexin (Fragment) OS=Homo sapiens GN=ANXA2 PE=1 SV=1;tr|H0YMU9|H0YMU9_HUMAN Annexin OS=Homo sapiens GN=ANXA2 PE=1 SV=1;tr|H0YN42|H0YN42_HUMAN Annexin (Frag	22	3	3	3	1	2	1	2	3	1	0	1	1	3	2	3	1	2	1	2	3	1	0	1	1	3	2	3	1	2	1	2	3	1	0	1	1	3	2	3	19.9	19.9
H0YN26;P39687;O95626;O43423	H0YN26;P39687;O95626	4;4;2;1	3;3;2;1	3;3;2;1	Acidic leucine-rich nuclear phosphoprotein 32 family member A;Acidic leucine-rich nuclear phosphoprotein 32 family member D	ANP32A;ANP32D	tr|H0YN26|H0YN26_HUMAN Acidic leucine-rich nuclear phosphoprotein 32 family member A OS=Homo sapiens GN=ANP32A PE=1 SV=1;sp|P39687|AN32A_HUMAN Acidic leucine-rich nuclear phosphoprotein 32 family member A OS=Homo sapiens GN=ANP32A PE=1 SV=1;sp|O95626|AN32D	4	4	3	3	4	4	4	3	4	4	4	3	3	3	3	3	3	3	3	2	3	3	3	2	2	2	2	2	3	3	3	2	3	3	3	2	2	2	2	2	20.3	13
H3BLZ8;Q92841	H3BLZ8;Q92841	4;4	2;2	2;2	Probable ATP-dependent RNA helicase DDX17	DDX17	tr|H3BLZ8|H3BLZ8_HUMAN Probable ATP-dependent RNA helicase DDX17 OS=Homo sapiens GN=DDX17 PE=1 SV=1;sp|Q92841|DDX17_HUMAN Probable ATP-dependent RNA helicase DDX17 OS=Homo sapiens GN=DDX17 PE=1 SV=2	2	4	2	2	4	2	3	2	2	2	4	2	3	2	4	2	2	0	1	1	0	0	2	0	1	0	2	0	2	0	1	1	0	0	2	0	1	0	2	0	7.5	4.4
H3BMD5;H3BMC7;Q96H22	H3BMD5;H3BMC7;Q96H22	1;1;1	1;1;1	1;1;1	Centromere protein N	CENPN	tr|H3BMD5|H3BMD5_HUMAN Centromere protein N OS=Homo sapiens GN=CENPN PE=1 SV=1;tr|H3BMC7|H3BMC7_HUMAN Centromere protein N (Fragment) OS=Homo sapiens GN=CENPN PE=1 SV=1;sp|Q96H22|CENPN_HUMAN Centromere protein N OS=Homo sapiens GN=CENPN PE=1 SV=2	3	1	1	1	1	1	1	1	0	1	1	1	1	1	1	1	1	1	1	1	0	1	1	1	1	1	1	1	1	1	1	1	0	1	1	1	1	1	1	1	14.5	14.5
H3BMH2;H3BSC1;P62491;Q15907;B4DQU5	H3BMH2;H3BSC1;P62491;Q15907;B4DQU5	2;2;2;2;1	2;2;2;2;1	2;2;2;2;1	Ras-related protein Rab-11A;Ras-related protein Rab-11B	RAB11A;RAB11B	tr|H3BMH2|H3BMH2_HUMAN Ras-related protein Rab-11A (Fragment) OS=Homo sapiens GN=RAB11A PE=4 SV=1;tr|H3BSC1|H3BSC1_HUMAN Ras-related protein Rab-11A OS=Homo sapiens GN=RAB11A PE=1 SV=1;sp|P62491|RB11A_HUMAN Ras-related protein Rab-11A OS=Homo sapiens GN=RA	5	2	2	2	1	1	1	1	1	1	2	1	1	1	1	0	1	1	1	1	1	1	2	1	1	1	1	0	1	1	1	1	1	1	2	1	1	1	1	0	11.6	11.6
H3BV80;H3BMM9;H3BTC0;Q15287;H3BPG5;H3BMS0;H3BRK4;H3BTV0;H3BNI3;H3BP82;H3BTR6;H3BUG0;H3BTY0;H3BNU7;H3BUL0	H3BV80;H3BMM9;H3BTC0;Q15287;H3BPG5;H3BMS0	9;9;9;9;7;5;1;1;1;1;1;1;1;1;1	9;9;9;9;7;5;1;1;1;1;1;1;1;1;1	9;9;9;9;7;5;1;1;1;1;1;1;1;1;1	RNA-binding protein with serine-rich domain 1	RNPS1	tr|H3BV80|H3BV80_HUMAN RNA-binding protein with serine-rich domain 1 OS=Homo sapiens GN=RNPS1 PE=1 SV=2;tr|H3BMM9|H3BMM9_HUMAN RNA-binding protein with serine-rich domain 1 (Fragment) OS=Homo sapiens GN=RNPS1 PE=1 SV=1;tr|H3BTC0|H3BTC0_HUMAN RNA-binding pr	15	9	9	9	7	7	7	7	7	7	8	8	7	8	7	7	7	7	7	7	7	7	8	8	7	8	7	7	7	7	7	7	7	7	8	8	7	8	7	7	41.2	41.2
H3BMQ1;H3BPF6;Q99471	H3BMQ1;H3BPF6;Q99471	1;1;1	1;1;1	1;1;1	Prefoldin subunit 5	PFDN5	tr|H3BMQ1|H3BMQ1_HUMAN Prefoldin subunit 5 OS=Homo sapiens GN=PFDN5 PE=1 SV=1;tr|H3BPF6|H3BPF6_HUMAN Prefoldin subunit 5 (Fragment) OS=Homo sapiens GN=PFDN5 PE=1 SV=1;sp|Q99471|PFD5_HUMAN Prefoldin subunit 5 OS=Homo sapiens GN=PFDN5 PE=1 SV=2	3	1	1	1	1	1	1	1	1	1	1	1	1	1	1	1	1	1	1	1	1	1	1	1	1	1	1	1	1	1	1	1	1	1	1	1	1	1	1	1	17.9	17.9
Q86WV2;H3BN72;H3BNV9;P13073;H3BNI5;H3BPG0	Q86WV2;H3BN72;H3BNV9;P13073;H3BNI5;H3BPG0	2;2;2;2;1;1	2;2;2;2;1;1	2;2;2;2;1;1	Cytochrome c oxidase subunit 4 isoform 1, mitochondrial	COX4I1	tr|Q86WV2|Q86WV2_HUMAN COX4I1 protein OS=Homo sapiens GN=COX4I1 PE=1 SV=1;tr|H3BN72|H3BN72_HUMAN Cytochrome c oxidase subunit 4 isoform 1, mitochondrial OS=Homo sapiens GN=COX4I1 PE=1 SV=1;tr|H3BNV9|H3BNV9_HUMAN Cytochrome c oxidase subunit 4 isoform 1, mi	6	2	2	2	1	0	1	0	1	1	2	1	1	0	0	1	1	0	1	0	1	1	2	1	1	0	0	1	1	0	1	0	1	1	2	1	1	0	0	1	27.7	27.7
H3BPC7	H3BPC7	1	1	1		ITPRIPL2	tr|H3BPC7|H3BPC7_HUMAN Inositol 1,4,5-trisphosphate receptor-interacting protein-like 2 (Fragment) OS=Homo sapiens GN=ITPRIPL2 PE=4 SV=2	1	1	1	1	0	0	0	0	0	0	1	0	0	0	0	1	0	0	0	0	0	0	1	0	0	0	0	1	0	0	0	0	0	0	1	0	0	0	0	1	7.1	7.1
H3BPE1;H3BQK9;H0Y390;Q9UPN3;H0YD69	H3BPE1;H3BQK9;H0Y390;Q9UPN3	7;7;6;6;1	7;7;6;6;1	7;7;6;6;1	Microtubule-actin cross-linking factor 1, isoforms 1/2/3/5	MACF1	tr|H3BPE1|H3BPE1_HUMAN Microtubule-actin cross-linking factor 1, isoforms 1/2/3/5 OS=Homo sapiens GN=MACF1 PE=1 SV=1;tr|H3BQK9|H3BQK9_HUMAN Microtubule-actin cross-linking factor 1, isoforms 1/2/3/5 OS=Homo sapiens GN=MACF1 PE=1 SV=1;tr|H0Y390|H0Y390_HUMAN	5	7	7	7	1	2	3	1	3	1	5	3	1	3	4	2	1	2	3	1	3	1	5	3	1	3	4	2	1	2	3	1	3	1	5	3	1	3	4	2	1.2	1.2
H3BPE7;P35637	H3BPE7;P35637	1;1	1;1	1;1	RNA-binding protein FUS	FUS	tr|H3BPE7|H3BPE7_HUMAN RNA-binding protein FUS OS=Homo sapiens GN=FUS PE=1 SV=1;sp|P35637|FUS_HUMAN RNA-binding protein FUS OS=Homo sapiens GN=FUS PE=1 SV=1	2	1	1	1	1	1	1	1	1	1	1	1	1	1	1	1	1	1	1	1	1	1	1	1	1	1	1	1	1	1	1	1	1	1	1	1	1	1	1	1	4.6	4.6
H3BPZ0;Q6PCT2;H7C112;H3BME1;H3BVB1;H3BPI8;H3BQP6	H3BPZ0;Q6PCT2;H7C112;H3BME1;H3BVB1	16;16;15;14;11;3;1	16;16;15;14;11;3;1	16;16;15;14;11;3;1	F-box/LRR-repeat protein 19	FBXL19	tr|H3BPZ0|H3BPZ0_HUMAN F-box/LRR-repeat protein 19 OS=Homo sapiens GN=FBXL19 PE=1 SV=1;sp|Q6PCT2|FXL19_HUMAN F-box/LRR-repeat protein 19 OS=Homo sapiens GN=FBXL19 PE=1 SV=3;tr|H7C112|H7C112_HUMAN F-box/LRR-repeat protein 19 (Fragment) OS=Homo sapiens GN=FB	7	16	16	16	12	11	14	11	12	13	9	10	10	13	11	11	12	11	14	11	12	13	9	10	10	13	11	11	12	11	14	11	12	13	9	10	10	13	11	11	34.1	34.1
H3BQZ7;Q1KMD3	H3BQZ7;Q1KMD3	1;1	1;1	1;1	Heterogeneous nuclear ribonucleoprotein U-like protein 2	HNRNPUL2-BSCL2;HNRNPUL2	tr|H3BQZ7|H3BQZ7_HUMAN HCG2044799 OS=Homo sapiens GN=HNRNPUL2-BSCL2 PE=4 SV=1;sp|Q1KMD3|HNRL2_HUMAN Heterogeneous nuclear ribonucleoprotein U-like protein 2 OS=Homo sapiens GN=HNRNPUL2 PE=1 SV=1	2	1	1	1	0	0	1	0	0	0	0	0	0	0	0	0	0	0	1	0	0	0	0	0	0	0	0	0	0	0	1	0	0	0	0	0	0	0	0	0	1.7	1.7
H3BR35;P15170;Q8IYD1	H3BR35;P15170;Q8IYD1	4;4;3	4;4;3	4;4;3	Eukaryotic peptide chain release factor GTP-binding subunit ERF3A;Eukaryotic peptide chain release factor GTP-binding subunit ERF3B	GSPT1;GSPT2	tr|H3BR35|H3BR35_HUMAN Eukaryotic peptide chain release factor GTP-binding subunit ERF3A (Fragment) OS=Homo sapiens GN=GSPT1 PE=1 SV=1;sp|P15170|ERF3A_HUMAN Eukaryotic peptide chain release factor GTP-binding subunit ERF3A OS=Homo sapiens GN=GSPT1 PE=1 SV=	3	4	4	4	2	0	2	2	1	2	3	3	1	2	2	2	2	0	2	2	1	2	3	3	1	2	2	2	2	0	2	2	1	2	3	3	1	2	2	2	11.2	11.2
H3BSM5;P60520;F5GZY7;H6UMI1;Q9H0R8;O95166	H3BSM5;P60520;F5GZY7;H6UMI1;Q9H0R8;O95166	2;2;1;1;1;1	2;2;1;1;1;1	2;2;1;1;1;1	Gamma-aminobutyric acid receptor-associated protein-like 2;Gamma-aminobutyric acid receptor-associated protein-like 1;Gamma-aminobutyric acid receptor-associated protein	GABARAPL2;GABARAPL1;GABARAP	tr|H3BSM5|H3BSM5_HUMAN Gamma-aminobutyric acid receptor-associated protein-like 2 OS=Homo sapiens GN=GABARAPL2 PE=1 SV=1;sp|P60520|GBRL2_HUMAN Gamma-aminobutyric acid receptor-associated protein-like 2 OS=Homo sapiens GN=GABARAPL2 PE=1 SV=1;tr|F5GZY7|F5GZY	6	2	2	2	2	1	2	1	2	2	2	2	2	2	2	2	2	1	2	1	2	2	2	2	2	2	2	2	2	1	2	1	2	2	2	2	2	2	2	2	20.5	20.5
H3BUM9;P41240;H3BN15;H3BU69	H3BUM9;P41240	3;3;1;1	3;3;1;1	3;3;1;1	Tyrosine-protein kinase CSK	CSK	tr|H3BUM9|H3BUM9_HUMAN Tyrosine-protein kinase CSK (Fragment) OS=Homo sapiens GN=CSK PE=1 SV=1;sp|P41240|CSK_HUMAN Tyrosine-protein kinase CSK OS=Homo sapiens GN=CSK PE=1 SV=1	4	3	3	3	2	1	2	1	2	1	1	2	1	2	3	3	2	1	2	1	2	1	1	2	1	2	3	3	2	1	2	1	2	1	1	2	1	2	3	3	35.5	35.5
H7BYH4;P00441	H7BYH4;P00441	1;1	1;1	1;1	Superoxide dismutase [Cu-Zn]	SOD1	tr|H7BYH4|H7BYH4_HUMAN Superoxide dismutase [Cu-Zn] OS=Homo sapiens GN=SOD1 PE=1 SV=1;sp|P00441|SODC_HUMAN Superoxide dismutase [Cu-Zn] OS=Homo sapiens GN=SOD1 PE=1 SV=2	2	1	1	1	1	1	1	1	1	1	1	0	1	1	1	0	1	1	1	1	1	1	1	0	1	1	1	0	1	1	1	1	1	1	1	0	1	1	1	0	8.9	8.9
H7BZQ4;Q96P26	H7BZQ4;Q96P26	1;1	1;1	1;1	Cytosolic 5-nucleotidase 1B	NT5C1B	tr|H7BZQ4|H7BZQ4_HUMAN Cytosolic 5-nucleotidase 1B (Fragment) OS=Homo sapiens GN=NT5C1B PE=1 SV=1;sp|Q96P26|5NT1B_HUMAN Cytosolic 5-nucleotidase 1B OS=Homo sapiens GN=NT5C1B PE=2 SV=2	2	1	1	1	0	0	0	0	0	0	0	0	0	0	1	0	0	0	0	0	0	0	0	0	0	0	1	0	0	0	0	0	0	0	0	0	0	0	1	0	3	3
H7C261;H7C114	H7C261;H7C114	1;1	1;1	1;1		PCLO	tr|H7C261|H7C261_HUMAN Protein piccolo (Fragment) OS=Homo sapiens GN=PCLO PE=1 SV=1;tr|H7C114|H7C114_HUMAN Protein piccolo (Fragment) OS=Homo sapiens GN=PCLO PE=1 SV=1	2	1	1	1	1	1	1	1	1	1	1	1	1	1	1	1	1	1	1	1	1	1	1	1	1	1	1	1	1	1	1	1	1	1	1	1	1	1	1	1	26.1	26.1
H7C1M2;H7C2G8;H7C1S4;H7C257	H7C1M2	37;13;1;1	4;0;0;0	4;0;0;0		SON	tr|H7C1M2|H7C1M2_HUMAN Protein SON (Fragment) OS=Homo sapiens GN=SON PE=1 SV=1	4	37	4	4	30	28	30	31	28	30	32	35	33	32	29	34	2	3	2	3	2	2	2	4	2	4	3	4	2	3	2	3	2	2	2	4	2	4	3	4	35.4	3
H7C252;Q9UG01	H7C252;Q9UG01	1;1	1;1	1;1	Intraflagellar transport protein 172 homolog	IFT172	tr|H7C252|H7C252_HUMAN Intraflagellar transport protein 172 homolog (Fragment) OS=Homo sapiens GN=IFT172 PE=1 SV=1;sp|Q9UG01|IF172_HUMAN Intraflagellar transport protein 172 homolog OS=Homo sapiens GN=IFT172 PE=1 SV=2	2	1	1	1	0	0	0	0	0	0	0	0	0	0	1	0	0	0	0	0	0	0	0	0	0	0	1	0	0	0	0	0	0	0	0	0	0	0	1	0	5.1	5.1
H7C2Q8;Q99848	H7C2Q8;Q99848	4;4	4;4	4;4	Probable rRNA-processing protein EBP2	EBNA1BP2	tr|H7C2Q8|H7C2Q8_HUMAN EBNA1 binding protein 2, isoform CRA_d OS=Homo sapiens GN=EBNA1BP2 PE=1 SV=1;sp|Q99848|EBP2_HUMAN Probable rRNA-processing protein EBP2 OS=Homo sapiens GN=EBNA1BP2 PE=1 SV=2	2	4	4	4	4	4	3	2	4	1	2	2	1	3	2	3	4	4	3	2	4	1	2	2	1	3	2	3	4	4	3	2	4	1	2	2	1	3	2	3	11.1	11.1
H7C5C7;P16333;C9J0K5;E7ERP6;E9PEE2;C9K098;C9JVV5;E7EPF5;C9J869;C9JAB9;O43639	H7C5C7;P16333;C9J0K5;E7ERP6;E9PEE2;C9K098;C9JVV5;E7EPF5;C9J869;C9JAB9;O43639	2;2;1;1;1;1;1;1;1;1;1	2;2;1;1;1;1;1;1;1;1;1	2;2;1;1;1;1;1;1;1;1;1	Cytoplasmic protein NCK1;Cytoplasmic protein NCK2	NCK1;NCK2	tr|H7C5C7|H7C5C7_HUMAN Cytoplasmic protein NCK1 (Fragment) OS=Homo sapiens GN=NCK1 PE=1 SV=1;sp|P16333|NCK1_HUMAN Cytoplasmic protein NCK1 OS=Homo sapiens GN=NCK1 PE=1 SV=1;tr|C9J0K5|C9J0K5_HUMAN Cytoplasmic protein NCK1 (Fragment) OS=Homo sapiens GN=NCK1	11	2	2	2	0	1	1	0	0	0	0	0	0	1	1	1	0	1	1	0	0	0	0	0	0	1	1	1	0	1	1	0	0	0	0	0	0	1	1	1	12.8	12.8
H7C5U6;Q9NRR4	H7C5U6;Q9NRR4	1;1	1;1	1;1	Ribonuclease 3	DROSHA	tr|H7C5U6|H7C5U6_HUMAN Ribonuclease 3 (Fragment) OS=Homo sapiens GN=DROSHA PE=1 SV=1;sp|Q9NRR4|RNC_HUMAN Ribonuclease 3 OS=Homo sapiens GN=DROSHA PE=1 SV=2	2	1	1	1	1	1	1	1	1	1	1	1	1	1	1	1	1	1	1	1	1	1	1	1	1	1	1	1	1	1	1	1	1	1	1	1	1	1	1	1	3.5	3.5
H9KVB4;O15417;H7C177	H9KVB4;O15417;H7C177	2;2;1	2;2;1	2;2;1	Trinucleotide repeat-containing gene 18 protein	TNRC18	tr|H9KVB4|H9KVB4_HUMAN Trinucleotide repeat-containing gene 18 protein OS=Homo sapiens GN=TNRC18 PE=1 SV=1;sp|O15417|TNC18_HUMAN Trinucleotide repeat-containing gene 18 protein OS=Homo sapiens GN=TNRC18 PE=1 SV=3;tr|H7C177|H7C177_HUMAN Trinucleotide repeat	3	2	2	2	2	1	1	2	2	1	2	2	1	2	2	1	2	1	1	2	2	1	2	2	1	2	2	1	2	1	1	2	2	1	2	2	1	2	2	1	1.3	1.3
I3L1L3;Q9BQG0;I3L311	I3L1L3;Q9BQG0	4;4;1	4;4;1	4;4;1	Myb-binding protein 1A	MYBBP1A	tr|I3L1L3|I3L1L3_HUMAN Myb-binding protein 1A (Fragment) OS=Homo sapiens GN=MYBBP1A PE=1 SV=1;sp|Q9BQG0|MBB1A_HUMAN Myb-binding protein 1A OS=Homo sapiens GN=MYBBP1A PE=1 SV=2	3	4	4	4	2	3	4	0	1	2	3	1	2	2	3	0	2	3	4	0	1	2	3	1	2	2	3	0	2	3	4	0	1	2	3	1	2	2	3	0	4.2	4.2
I3L1P8;Q02978	I3L1P8;Q02978	1;1	1;1	1;1	Mitochondrial 2-oxoglutarate/malate carrier protein	SLC25A11	tr|I3L1P8|I3L1P8_HUMAN Mitochondrial 2-oxoglutarate/malate carrier protein (Fragment) OS=Homo sapiens GN=SLC25A11 PE=1 SV=1;sp|Q02978|M2OM_HUMAN Mitochondrial 2-oxoglutarate/malate carrier protein OS=Homo sapiens GN=SLC25A11 PE=1 SV=3	2	1	1	1	0	1	0	0	0	1	0	1	0	1	1	0	0	1	0	0	0	1	0	1	0	1	1	0	0	1	0	0	0	1	0	1	0	1	1	0	5.4	5.4
I3L397;I3L504;P63241;Q6IS14;F8WCJ1;C9J7B5;C9J4W5;Q9GZV4	I3L397;I3L504;P63241;Q6IS14;F8WCJ1;C9J7B5;C9J4W5;Q9GZV4	11;11;11;7;6;6;6;6	11;11;11;7;6;6;6;6	11;11;11;7;6;6;6;6	Eukaryotic translation initiation factor 5A;Eukaryotic translation initiation factor 5A-1;Eukaryotic translation initiation factor 5A-1-like;Eukaryotic translation initiation factor 5A-2	EIF5A;EIF5AL1;EIF5A2	tr|I3L397|I3L397_HUMAN Eukaryotic translation initiation factor 5A (Fragment) OS=Homo sapiens GN=EIF5A PE=1 SV=7;tr|I3L504|I3L504_HUMAN Eukaryotic translation initiation factor 5A-1 OS=Homo sapiens GN=EIF5A PE=1 SV=1;sp|P63241|IF5A1_HUMAN Eukaryotic transl	8	11	11	11	10	9	10	9	9	8	9	9	9	9	9	9	10	9	10	9	9	8	9	9	9	9	9	9	10	9	10	9	9	8	9	9	9	9	9	9	59.2	59.2
I3L3P7;P62244;I3L246;H3BN98;H3BV27;H3BT37;I3L303;H3BVC7	I3L3P7;P62244;I3L246;H3BN98	3;3;2;2;1;1;1;1	3;3;2;2;1;1;1;1	3;3;2;2;1;1;1;1	40S ribosomal protein S15a	RPS15A	tr|I3L3P7|I3L3P7_HUMAN 40S ribosomal protein S15a OS=Homo sapiens GN=RPS15A PE=1 SV=1;sp|P62244|RS15A_HUMAN 40S ribosomal protein S15a OS=Homo sapiens GN=RPS15A PE=1 SV=2;tr|I3L246|I3L246_HUMAN 40S ribosomal protein S15a OS=Homo sapiens GN=RPS15A PE=1 SV=1	8	3	3	3	3	3	3	2	3	3	3	3	3	3	3	3	3	3	3	2	3	3	3	3	3	3	3	3	3	3	3	2	3	3	3	3	3	3	3	3	32	32
J3KN16;Q5VYK3;R4GMY1	J3KN16;Q5VYK3;R4GMY1	6;6;3	6;6;3	6;6;3	Proteasome-associated protein ECM29 homolog	KIAA0368;ECM29	tr|J3KN16|J3KN16_HUMAN Proteasome-associated protein ECM29 homolog OS=Homo sapiens GN=KIAA0368 PE=1 SV=1;sp|Q5VYK3|ECM29_HUMAN Proteasome-associated protein ECM29 homolog OS=Homo sapiens GN=ECM29 PE=1 SV=2;tr|R4GMY1|R4GMY1_HUMAN Proteasome-associated prote	3	6	6	6	2	2	5	2	4	4	3	6	4	3	4	3	2	2	5	2	4	4	3	6	4	3	4	3	2	2	5	2	4	4	3	6	4	3	4	3	3.9	3.9
J3KNE3;P68402	J3KNE3;P68402	1;1	1;1	1;1	Platelet-activating factor acetylhydrolase IB subunit beta	PAFAH1B2	tr|J3KNE3|J3KNE3_HUMAN Platelet-activating factor acetylhydrolase IB subunit beta (Fragment) OS=Homo sapiens GN=PAFAH1B2 PE=1 SV=1;sp|P68402|PA1B2_HUMAN Platelet-activating factor acetylhydrolase IB subunit beta OS=Homo sapiens GN=PAFAH1B2 PE=1 SV=1	2	1	1	1	1	1	1	1	1	0	1	0	0	0	0	1	1	1	1	1	1	0	1	0	0	0	0	1	1	1	1	1	1	0	1	0	0	0	0	1	5.1	5.1
J3KNZ9;Q9HAH7;H3BRE6	J3KNZ9;Q9HAH7	4;2;1	4;2;1	4;2;1	Probable fibrosin-1	FBRS	tr|J3KNZ9|J3KNZ9_HUMAN Probable fibrosin-1 OS=Homo sapiens GN=FBRS PE=1 SV=1;sp|Q9HAH7|FBRS_HUMAN Probable fibrosin-1 OS=Homo sapiens GN=FBRS PE=1 SV=3	3	4	4	4	4	4	4	3	4	4	3	4	3	3	4	4	4	4	4	3	4	4	3	4	3	3	4	4	4	4	4	3	4	4	3	4	3	3	4	4	6.3	6.3
J3KP15;Q01130;J3QL05	J3KP15;Q01130;J3QL05	9;9;8	9;9;8	7;7;6	Serine/arginine-rich splicing factor 2	SRSF2	tr|J3KP15|J3KP15_HUMAN Serine/arginine-rich-splicing factor 2 (Fragment) OS=Homo sapiens GN=SRSF2 PE=1 SV=7;sp|Q01130|SRSF2_HUMAN Serine/arginine-rich splicing factor 2 OS=Homo sapiens GN=SRSF2 PE=1 SV=4;tr|J3QL05|J3QL05_HUMAN Serine/arginine-rich-splicing	3	9	9	7	9	9	9	9	9	9	9	9	9	9	9	9	9	9	9	9	9	9	9	9	9	9	9	9	7	7	7	7	7	7	7	7	7	7	7	7	56	56
J3KPP4;O95232;D6RDI2;C9JL41;H0YA81;H0YBV7;H0YAR4;H7C5U7;E7EN55;D6RHH0;U3KQT3	J3KPP4;O95232	21;21;8;4;4;3;3;2;2;1;1	21;21;8;4;4;3;3;2;2;1;1	21;21;8;4;4;3;3;2;2;1;1	Luc7-like protein 3	LUC7L3	tr|J3KPP4|J3KPP4_HUMAN Cisplatin resistance-associated overexpressed protein, isoform CRA_b OS=Homo sapiens GN=LUC7L3 PE=1 SV=1;sp|O95232|LC7L3_HUMAN Luc7-like protein 3 OS=Homo sapiens GN=LUC7L3 PE=1 SV=2	11	21	21	21	18	18	19	20	20	21	21	20	20	21	19	21	18	18	19	20	20	21	21	20	20	21	19	21	18	18	19	20	20	21	21	20	20	21	19	21	43.8	43.8
J3KQ32;Q9NTK5;C9JCJ9;C9JTK6	J3KQ32;Q9NTK5	5;5;1;1	5;5;1;1	5;5;1;1	Obg-like ATPase 1	OLA1	tr|J3KQ32|J3KQ32_HUMAN Obg-like ATPase 1 OS=Homo sapiens GN=OLA1 PE=1 SV=1;sp|Q9NTK5|OLA1_HUMAN Obg-like ATPase 1 OS=Homo sapiens GN=OLA1 PE=1 SV=2	4	5	5	5	3	3	3	2	3	4	2	3	3	4	4	2	3	3	3	2	3	4	2	3	3	4	4	2	3	3	3	2	3	4	2	3	3	4	4	2	15.1	15.1
J3KQN4;P83881;H0Y5B4;H7BZ11;Q969Q0;R4GN19;H7BY91;H0Y3V9	J3KQN4;P83881;H0Y5B4;H7BZ11;Q969Q0;R4GN19	4;4;3;3;3;2;1;1	4;4;3;3;3;2;1;1	4;4;3;3;3;2;1;1	60S ribosomal protein L36a;60S ribosomal protein L36a-like	RPL36A;RPL36A-HNRNPH2;RPL36AL	tr|J3KQN4|J3KQN4_HUMAN 60S ribosomal protein L36a OS=Homo sapiens GN=RPL36A PE=3 SV=1;sp|P83881|RL36A_HUMAN 60S ribosomal protein L36a OS=Homo sapiens GN=RPL36A PE=1 SV=2;tr|H0Y5B4|H0Y5B4_HUMAN 60S ribosomal protein L36a OS=Homo sapiens GN=RPL36A PE=3 SV=2	8	4	4	4	3	3	3	2	4	3	4	3	3	3	2	2	3	3	3	2	4	3	4	3	3	3	2	2	3	3	3	2	4	3	4	3	3	3	2	2	22.5	22.5
J3KRE2;J3KTF8;J3QQX2;P52565;J3KS60;J3KRY1	J3KRE2;J3KTF8;J3QQX2;P52565;J3KS60;J3KRY1	4;4;4;4;2;2	4;4;4;4;2;2	4;4;4;4;2;2	Rho GDP-dissociation inhibitor 1	ARHGDIA	tr|J3KRE2|J3KRE2_HUMAN Rho GDP-dissociation inhibitor 1 OS=Homo sapiens GN=ARHGDIA PE=1 SV=1;tr|J3KTF8|J3KTF8_HUMAN Rho GDP-dissociation inhibitor 1 (Fragment) OS=Homo sapiens GN=ARHGDIA PE=1 SV=7;tr|J3QQX2|J3QQX2_HUMAN Rho GDP-dissociation inhibitor 1 OS=	6	4	4	4	3	3	3	3	4	4	4	4	4	4	4	4	3	3	3	3	4	4	4	4	4	4	4	4	3	3	3	3	4	4	4	4	4	4	4	4	33.3	33.3
J3KRR0;J3QQM5;Q9BT23	J3KRR0;J3QQM5;Q9BT23	1;1;1	1;1;1	1;1;1	LIM domain-containing protein 2	LIMD2	tr|J3KRR0|J3KRR0_HUMAN LIM domain containing 2, isoform CRA_b OS=Homo sapiens GN=LIMD2 PE=1 SV=1;tr|J3QQM5|J3QQM5_HUMAN LIM domain-containing protein 2 (Fragment) OS=Homo sapiens GN=LIMD2 PE=1 SV=1;sp|Q9BT23|LIMD2_HUMAN LIM domain-containing protein 2 OS=H	3	1	1	1	1	1	1	1	1	1	1	1	1	1	1	1	1	1	1	1	1	1	1	1	1	1	1	1	1	1	1	1	1	1	1	1	1	1	1	1	19.5	19.5
J3KTA4;P17844;J3QSF1;J3KRZ1;A0A0U1RQJ0;J3QR02;J3KRX8;J3QRQ7	J3KTA4;P17844;J3QSF1	5;5;3;2;1;1;1;1	4;4;2;1;1;1;1;1	3;3;2;1;0;1;1;1	Probable ATP-dependent RNA helicase DDX5	DDX5	tr|J3KTA4|J3KTA4_HUMAN Probable ATP-dependent RNA helicase DDX5 OS=Homo sapiens GN=DDX5 PE=1 SV=1;sp|P17844|DDX5_HUMAN Probable ATP-dependent RNA helicase DDX5 OS=Homo sapiens GN=DDX5 PE=1 SV=1;tr|J3QSF1|J3QSF1_HUMAN Probable ATP-dependent RNA helicase DDX	8	5	4	3	4	4	5	4	3	5	5	5	5	5	3	3	3	3	4	4	2	4	4	4	4	4	2	2	2	2	3	3	1	3	3	3	3	3	1	1	8.5	6.7
J3QR09;J3KTE4;P84098;J3QL15	J3QR09;J3KTE4;P84098	5;5;5;2	5;5;5;2	5;5;5;2	Ribosomal protein L19;60S ribosomal protein L19	RPL19	tr|J3QR09|J3QR09_HUMAN Ribosomal protein L19 OS=Homo sapiens GN=RPL19 PE=1 SV=1;tr|J3KTE4|J3KTE4_HUMAN Ribosomal protein L19 OS=Homo sapiens GN=RPL19 PE=1 SV=1;sp|P84098|RL19_HUMAN 60S ribosomal protein L19 OS=Homo sapiens GN=RPL19 PE=1 SV=1	4	5	5	5	5	5	5	5	5	5	5	5	5	5	5	5	5	5	5	5	5	5	5	5	5	5	5	5	5	5	5	5	5	5	5	5	5	5	5	5	25.9	25.9
J3KTL2;Q07955;J3QQV5;J3KSW7;J3KSR8	J3KTL2;Q07955	14;14;6;6;6	14;14;6;6;6	14;14;6;6;6	Serine/arginine-rich splicing factor 1	SRSF1	tr|J3KTL2|J3KTL2_HUMAN Serine/arginine-rich-splicing factor 1 OS=Homo sapiens GN=SRSF1 PE=1 SV=1;sp|Q07955|SRSF1_HUMAN Serine/arginine-rich splicing factor 1 OS=Homo sapiens GN=SRSF1 PE=1 SV=2	5	14	14	14	14	14	14	13	14	14	13	13	13	13	13	14	14	14	14	13	14	14	13	13	13	13	13	14	14	14	14	13	14	14	13	13	13	13	13	14	47.4	47.4
J3QK89;Q8IWX8	J3QK89;Q8IWX8	20;20	20;20	20;20	Calcium homeostasis endoplasmic reticulum protein	CHERP	tr|J3QK89|J3QK89_HUMAN Calcium homeostasis endoplasmic reticulum protein OS=Homo sapiens GN=CHERP PE=1 SV=1;sp|Q8IWX8|CHERP_HUMAN Calcium homeostasis endoplasmic reticulum protein OS=Homo sapiens GN=CHERP PE=1 SV=3	2	20	20	20	18	19	18	17	19	19	17	18	18	18	19	17	18	19	18	17	19	19	17	18	18	18	19	17	18	19	18	17	19	19	17	18	18	18	19	17	26.9	26.9
J3QQ67;Q07020;G3V203;H0YHA7;F8VYV2;F8VUA6;A0A075B7A0;F8VXR6	J3QQ67;Q07020;G3V203;H0YHA7;F8VYV2;F8VUA6;A0A075B7A0	8;8;7;7;6;5;5;1	8;8;7;7;6;5;5;1	8;8;7;7;6;5;5;1	60S ribosomal protein L18	RPL18	tr|J3QQ67|J3QQ67_HUMAN 60S ribosomal protein L18 (Fragment) OS=Homo sapiens GN=RPL18 PE=1 SV=1;sp|Q07020|RL18_HUMAN 60S ribosomal protein L18 OS=Homo sapiens GN=RPL18 PE=1 SV=2;tr|G3V203|G3V203_HUMAN 60S ribosomal protein L18 OS=Homo sapiens GN=RPL18 PE=1	8	8	8	8	7	7	8	7	7	6	7	7	6	7	7	7	7	7	8	7	7	6	7	7	6	7	7	7	7	7	8	7	7	6	7	7	6	7	7	7	42.1	42.1
J3QRI7;J3QQQ9;J3QQV1;J3QRC4;P61254;J3KTJ8;J3KSS0;J3KS10	J3QRI7;J3QQQ9;J3QQV1;J3QRC4;P61254;J3KTJ8	7;7;7;7;7;6;3;2	7;7;7;7;7;6;3;2	1;1;1;1;1;1;1;0	60S ribosomal protein L26	RPL26	tr|J3QRI7|J3QRI7_HUMAN 60S ribosomal protein L26 (Fragment) OS=Homo sapiens GN=RPL26 PE=4 SV=1;tr|J3QQQ9|J3QQQ9_HUMAN Uncharacterized protein OS=Homo sapiens PE=4 SV=1;tr|J3QQV1|J3QQV1_HUMAN 60S ribosomal protein L26 OS=Homo sapiens GN=RPL26 PE=4 SV=1;tr|J	8	7	7	1	6	6	6	5	5	6	5	5	6	6	6	6	6	6	6	5	5	6	5	5	6	6	6	6	1	1	1	1	1	1	1	1	1	1	1	1	52.3	52.3
J3QQV6;Q9NVS9	J3QQV6;Q9NVS9	1;1	1;1	1;1	Pyridoxine-5-phosphate oxidase	PNPO	tr|J3QQV6|J3QQV6_HUMAN Pyridoxine-5-phosphate oxidase (Fragment) OS=Homo sapiens GN=PNPO PE=1 SV=1;sp|Q9NVS9|PNPO_HUMAN Pyridoxine-5-phosphate oxidase OS=Homo sapiens GN=PNPO PE=1 SV=1	2	1	1	1	0	0	0	1	0	0	0	0	0	0	0	0	0	0	0	1	0	0	0	0	0	0	0	0	0	0	0	1	0	0	0	0	0	0	0	0	15	15
J3QR44;A0A0D9SEI3;B7ZVY7;A0A0D9SER5;A0A0D9SEN2;P21127;J3QR29;Q9UQ88;Q5QPR3;Q5QPR4;E7ESP2;J3KS35;E9PFJ2;Q5QPQ9;Q13882	J3QR44;A0A0D9SEI3;B7ZVY7;A0A0D9SER5;A0A0D9SEN2;P21127;J3QR29;Q9UQ88;Q5QPR3;Q5QPR4	26;25;25;25;25;25;24;24;23;22;7;6;4;1;1	26;25;25;25;25;25;24;24;23;22;7;6;4;1;1	22;21;21;21;21;21;21;20;19;19;3;2;0;0;1	Cyclin-dependent kinase 11B;Cyclin-dependent kinase 11A	CDK11B;CDC2L1;CDK11A	tr|J3QR44|J3QR44_HUMAN Cyclin-dependent kinase 11B OS=Homo sapiens GN=CDK11B PE=1 SV=2;tr|A0A0D9SEI3|A0A0D9SEI3_HUMAN Cyclin-dependent kinase 11B OS=Homo sapiens GN=CDK11B PE=1 SV=1;tr|B7ZVY7|B7ZVY7_HUMAN Cell division cycle 2-like 1 (PITSLRE proteins) OS=	15	26	26	22	25	23	23	21	24	23	21	23	21	24	20	22	25	23	23	21	24	23	21	23	21	24	20	22	21	20	20	18	20	20	18	19	18	21	17	19	33.7	33.7
J3QRS3;P19105;O14950;P24844;J3KTJ1	J3QRS3;P19105;O14950;P24844;J3KTJ1	5;5;5;4;3	5;5;5;4;3	5;5;5;4;3	Myosin regulatory light chain 12A;Myosin regulatory light chain 12B;Myosin regulatory light polypeptide 9	MYL12A;MYL12B;MYL9	tr|J3QRS3|J3QRS3_HUMAN Myosin regulatory light chain 12A OS=Homo sapiens GN=MYL12A PE=1 SV=1;sp|P19105|ML12A_HUMAN Myosin regulatory light chain 12A OS=Homo sapiens GN=MYL12A PE=1 SV=2;sp|O14950|ML12B_HUMAN Myosin regulatory light chain 12B OS=Homo sapiens	5	5	5	5	5	5	4	1	2	3	3	4	3	3	3	2	5	5	4	1	2	3	3	4	3	3	3	2	5	5	4	1	2	3	3	4	3	3	3	2	33.3	33.3
J9JID7;Q03252	J9JID7;Q03252	2;2	1;1	1;1	Lamin-B2	LMNB2	tr|J9JID7|J9JID7_HUMAN Lamin B2, isoform CRA_a OS=Homo sapiens GN=LMNB2 PE=1 SV=1;sp|Q03252|LMNB2_HUMAN Lamin-B2 OS=Homo sapiens GN=LMNB2 PE=1 SV=4	2	2	1	1	2	2	2	1	2	2	2	1	2	2	0	0	1	1	1	1	1	1	1	0	1	1	0	0	1	1	1	1	1	1	1	0	1	1	0	0	2.9	1.6
K7EKE5;K7EIS0;Q9NRH3;P23258	K7EKE5;K7EIS0;Q9NRH3;P23258	1;1;1;1	1;1;1;1	1;1;1;1	Tubulin gamma chain;Tubulin gamma-2 chain;Tubulin gamma-1 chain	TUBG1;TUBG2	tr|K7EKE5|K7EKE5_HUMAN Tubulin gamma-1 chain OS=Homo sapiens GN=TUBG1 PE=4 SV=1;tr|K7EIS0|K7EIS0_HUMAN Tubulin gamma chain (Fragment) OS=Homo sapiens GN=TUBG1 PE=1 SV=1;sp|Q9NRH3|TBG2_HUMAN Tubulin gamma-2 chain OS=Homo sapiens GN=TUBG2 PE=2 SV=1;sp|P23258	4	1	1	1	0	1	1	1	1	1	0	0	1	0	1	0	0	1	1	1	1	1	0	0	1	0	1	0	0	1	1	1	1	1	0	0	1	0	1	0	11.1	11.1
K7EJP7;K7EQ06	K7EJP7;K7EQ06	2;1	1;1	1;1		HDGFRP2	tr|K7EJP7|K7EJP7_HUMAN Hepatoma-derived growth factor-related protein 2 (Fragment) OS=Homo sapiens GN=HDGFRP2 PE=1 SV=1;tr|K7EQ06|K7EQ06_HUMAN Hepatoma-derived growth factor-related protein 2 (Fragment) OS=Homo sapiens GN=HDGFRP2 PE=1 SV=1	2	2	1	1	1	1	1	1	2	1	2	2	2	2	2	2	0	0	0	0	1	0	1	1	1	1	1	1	0	0	0	0	1	0	1	1	1	1	1	1	16.5	10.7
K7EK06;K7ER16;Q9Y285	K7EK06;K7ER16;Q9Y285	1;1;1	1;1;1	1;1;1	Phenylalanine--tRNA ligase alpha subunit	FARSA	tr|K7EK06|K7EK06_HUMAN Phenylalanine--tRNA ligase alpha subunit (Fragment) OS=Homo sapiens GN=FARSA PE=1 SV=7;tr|K7ER16|K7ER16_HUMAN Phenylalanine--tRNA ligase alpha subunit OS=Homo sapiens GN=FARSA PE=1 SV=1;sp|Q9Y285|SYFA_HUMAN Phenylalanine--tRNA ligase	3	1	1	1	1	1	1	1	1	1	1	1	1	1	1	1	1	1	1	1	1	1	1	1	1	1	1	1	1	1	1	1	1	1	1	1	1	1	1	1	6.5	6.5
K7EK77;P25705;K7EQH4;K7EJP1;K7ERX7;K7ENJ4;K7ESA0	K7EK77;P25705;K7EQH4;K7EJP1;K7ERX7;K7ENJ4	4;4;3;3;3;2;1	4;4;3;3;3;2;1	4;4;3;3;3;2;1	ATP synthase subunit alpha, mitochondrial	ATP5A1	tr|K7EK77|K7EK77_HUMAN ATP synthase subunit alpha, mitochondrial (Fragment) OS=Homo sapiens GN=ATP5A1 PE=1 SV=1;sp|P25705|ATPA_HUMAN ATP synthase subunit alpha, mitochondrial OS=Homo sapiens GN=ATP5A1 PE=1 SV=1;tr|K7EQH4|K7EQH4_HUMAN ATP synthase subunit a	7	4	4	4	3	3	2	2	2	3	3	3	2	3	3	2	3	3	2	2	2	3	3	3	2	3	3	2	3	3	2	2	2	3	3	3	2	3	3	2	23.7	23.7
K7EL20;O75821;K7ER90;K7ENA8;K7EP16	K7EL20;O75821;K7ER90;K7ENA8	5;5;4;3;2	5;5;4;3;2	5;5;4;3;2	Eukaryotic translation initiation factor 3 subunit G	EIF3G	tr|K7EL20|K7EL20_HUMAN Eukaryotic translation initiation factor 3 subunit G (Fragment) OS=Homo sapiens GN=EIF3G PE=1 SV=7;sp|O75821|EIF3G_HUMAN Eukaryotic translation initiation factor 3 subunit G OS=Homo sapiens GN=EIF3G PE=1 SV=2;tr|K7ER90|K7ER90_HUMAN E	5	5	5	5	5	3	4	5	4	4	4	4	3	3	4	4	5	3	4	5	4	4	4	4	3	3	4	4	5	3	4	5	4	4	4	4	3	3	4	4	22.4	22.4
M0R0E6;K7ELM3	M0R0E6;K7ELM3	1;1	1;1	1;1		CGB2;CGB1	tr|M0R0E6|M0R0E6_HUMAN Choriogonadotropin subunit beta variant 2 (Fragment) OS=Homo sapiens GN=CGB2 PE=3 SV=7;tr|K7ELM3|K7ELM3_HUMAN Choriogonadotropin subunit beta variant 1 (Fragment) OS=Homo sapiens GN=CGB1 PE=3 SV=7	2	1	1	1	1	1	1	1	1	1	1	1	1	1	1	1	1	1	1	1	1	1	1	1	1	1	1	1	1	1	1	1	1	1	1	1	1	1	1	1	10	10
K7ELW0;Q99497;K7EN27	K7ELW0;Q99497;K7EN27	3;3;2	3;3;2	3;3;2	Protein deglycase DJ-1	PARK7	tr|K7ELW0|K7ELW0_HUMAN Protein deglycase DJ-1 OS=Homo sapiens GN=PARK7 PE=1 SV=1;sp|Q99497|PARK7_HUMAN Protein deglycase DJ-1 OS=Homo sapiens GN=PARK7 PE=1 SV=2;tr|K7EN27|K7EN27_HUMAN Protein deglycase DJ-1 (Fragment) OS=Homo sapiens GN=PARK7 PE=1 SV=1	3	3	3	3	3	3	3	1	2	1	2	2	3	2	1	1	3	3	3	1	2	1	2	2	3	2	1	1	3	3	3	1	2	1	2	2	3	2	1	1	17.8	17.8
K7EM18;P41567;O60739;K7EQP2	K7EM18;P41567;O60739	5;5;4;1	5;5;4;1	5;5;4;1	Eukaryotic translation initiation factor 1;Eukaryotic translation initiation factor 1b	EIF1;EIF1B	tr|K7EM18|K7EM18_HUMAN Eukaryotic translation initiation factor 1 OS=Homo sapiens GN=EIF1 PE=1 SV=1;sp|P41567|EIF1_HUMAN Eukaryotic translation initiation factor 1 OS=Homo sapiens GN=EIF1 PE=1 SV=1;sp|O60739|EIF1B_HUMAN Eukaryotic translation initiation fa	4	5	5	5	5	5	5	4	4	5	4	4	4	5	5	4	5	5	5	4	4	5	4	4	4	5	5	4	5	5	5	4	4	5	4	4	4	5	5	4	59.5	59.5
K7EQW8	K7EQW8	2	1	1		TPM4	tr|K7EQW8|K7EQW8_HUMAN Tropomyosin alpha-4 chain (Fragment) OS=Homo sapiens GN=TPM4 PE=1 SV=1	1	2	1	1	1	2	1	2	2	2	2	2	2	1	2	1	1	1	1	1	1	1	1	1	1	1	1	1	1	1	1	1	1	1	1	1	1	1	1	1	49.2	27.1
M0QY97;Q9UPT8	M0QY97;Q9UPT8	3;3	3;3	3;3	Zinc finger CCCH domain-containing protein 4	ZC3H4	tr|M0QY97|M0QY97_HUMAN Zinc finger CCCH domain-containing protein 4 (Fragment) OS=Homo sapiens GN=ZC3H4 PE=1 SV=1;sp|Q9UPT8|ZC3H4_HUMAN Zinc finger CCCH domain-containing protein 4 OS=Homo sapiens GN=ZC3H4 PE=1 SV=3	2	3	3	3	1	1	2	1	2	1	3	2	2	3	1	1	1	1	2	1	2	1	3	2	2	3	1	1	1	1	2	1	2	1	3	2	2	3	1	1	4.4	4.4
M0R0F0;M0R0R2;P46782;M0QZN2	M0R0F0;M0R0R2;P46782;M0QZN2	4;4;4;3	4;4;4;3	4;4;4;3	40S ribosomal protein S5;40S ribosomal protein S5, N-terminally processed	RPS5	tr|M0R0F0|M0R0F0_HUMAN 40S ribosomal protein S5 (Fragment) OS=Homo sapiens GN=RPS5 PE=1 SV=1;tr|M0R0R2|M0R0R2_HUMAN 40S ribosomal protein S5 OS=Homo sapiens GN=RPS5 PE=1 SV=1;sp|P46782|RS5_HUMAN 40S ribosomal protein S5 OS=Homo sapiens GN=RPS5 PE=1 SV=4;tr	4	4	4	4	3	3	3	2	3	3	3	3	3	3	3	3	3	3	3	2	3	3	3	3	3	3	3	3	3	3	3	2	3	3	3	3	3	3	3	3	24.5	24.5
M0R3D6;M0R1A7;M0R117;Q02543;M0R0P7	M0R3D6;M0R1A7;M0R117;Q02543;M0R0P7	5;5;5;5;3	5;5;5;5;3	5;5;5;5;3	60S ribosomal protein L18a	RPL18A	tr|M0R3D6|M0R3D6_HUMAN 60S ribosomal protein L18a (Fragment) OS=Homo sapiens GN=RPL18A PE=1 SV=1;tr|M0R1A7|M0R1A7_HUMAN 60S ribosomal protein L18a OS=Homo sapiens GN=RPL18A PE=1 SV=1;tr|M0R117|M0R117_HUMAN 60S ribosomal protein L18a OS=Homo sapiens GN=RPL1	5	5	5	5	5	5	5	4	5	5	5	5	5	5	5	5	5	5	5	4	5	5	5	5	5	5	5	5	5	5	5	4	5	5	5	5	5	5	5	5	33.3	33.3
O00151	O00151	7	7	7	PDZ and LIM domain protein 1	PDLIM1	sp|O00151|PDLI1_HUMAN PDZ and LIM domain protein 1 OS=Homo sapiens GN=PDLIM1 PE=1 SV=4	1	7	7	7	6	7	7	6	7	6	6	4	6	6	7	7	6	7	7	6	7	6	6	4	6	6	7	7	6	7	7	6	7	6	6	4	6	6	7	7	27.7	27.7
O00170;E9PMH2	O00170;E9PMH2	2;1	2;1	2;1	AH receptor-interacting protein	AIP	sp|O00170|AIP_HUMAN AH receptor-interacting protein OS=Homo sapiens GN=AIP PE=1 SV=2;tr|E9PMH2|E9PMH2_HUMAN AH receptor-interacting protein (Fragment) OS=Homo sapiens GN=AIP PE=1 SV=2	2	2	2	2	1	0	0	0	1	0	2	1	1	1	0	1	1	0	0	0	1	0	2	1	1	1	0	1	1	0	0	0	1	0	2	1	1	1	0	1	8.8	8.8
O00203;Q13367;H0YBD0	O00203	23;3;2	23;3;2	23;3;2	AP-3 complex subunit beta-1	AP3B1	sp|O00203|AP3B1_HUMAN AP-3 complex subunit beta-1 OS=Homo sapiens GN=AP3B1 PE=1 SV=3	3	23	23	23	21	19	20	19	19	17	19	17	15	16	17	16	21	19	20	19	19	17	19	17	15	16	17	16	21	19	20	19	19	17	19	17	15	16	17	16	22.5	22.5
O00264;U3KQM0;O15173	O00264;U3KQM0;O15173	2;1;1	2;1;1	2;1;1	Membrane-associated progesterone receptor component 1;Membrane-associated progesterone receptor component 2	PGRMC1;PGRMC2	sp|O00264|PGRC1_HUMAN Membrane-associated progesterone receptor component 1 OS=Homo sapiens GN=PGRMC1 PE=1 SV=3;tr|U3KQM0|U3KQM0_HUMAN Membrane-associated progesterone receptor component 2 OS=Homo sapiens GN=PGRMC2 PE=1 SV=1;sp|O15173|PGRC2_HUMAN Membrane-	3	2	2	2	2	0	1	0	1	1	1	0	0	1	0	0	2	0	1	0	1	1	1	0	0	1	0	0	2	0	1	0	1	1	1	0	0	1	0	0	8.7	8.7
O00267	O00267	5	5	5	Transcription elongation factor SPT5	SUPT5H	sp|O00267|SPT5H_HUMAN Transcription elongation factor SPT5 OS=Homo sapiens GN=SUPT5H PE=1 SV=1	1	5	5	5	4	3	2	1	3	3	3	3	3	5	4	4	4	3	2	1	3	3	3	3	3	5	4	4	4	3	2	1	3	3	3	3	3	5	4	4	6.3	6.3
O00273;K7ERT1	O00273;K7ERT1	2;1	2;1	2;1	DNA fragmentation factor subunit alpha	DFFA	sp|O00273|DFFA_HUMAN DNA fragmentation factor subunit alpha OS=Homo sapiens GN=DFFA PE=1 SV=1;tr|K7ERT1|K7ERT1_HUMAN DNA fragmentation factor subunit alpha OS=Homo sapiens GN=DFFA PE=1 SV=1	2	2	2	2	2	1	0	0	0	0	0	1	0	0	0	0	2	1	0	0	0	0	0	1	0	0	0	0	2	1	0	0	0	0	0	1	0	0	0	0	9.1	9.1
O00299	O00299	5	5	5	Chloride intracellular channel protein 1	CLIC1	sp|O00299|CLIC1_HUMAN Chloride intracellular channel protein 1 OS=Homo sapiens GN=CLIC1 PE=1 SV=4	1	5	5	5	2	1	3	3	3	2	2	1	1	2	3	1	2	1	3	3	3	2	2	1	1	2	3	1	2	1	3	3	3	2	2	1	1	2	3	1	31.1	31.1
O00459;E9PFP1;V9GYJ4	O00459;E9PFP1	12;6;2	11;6;2	11;6;2	Phosphatidylinositol 3-kinase regulatory subunit beta	PIK3R2	sp|O00459|P85B_HUMAN Phosphatidylinositol 3-kinase regulatory subunit beta OS=Homo sapiens GN=PIK3R2 PE=1 SV=2;tr|E9PFP1|E9PFP1_HUMAN Phosphatidylinositol 3-kinase regulatory subunit beta OS=Homo sapiens GN=PIK3R2 PE=1 SV=1	3	12	11	11	8	9	11	4	6	6	6	7	9	10	10	9	7	8	10	3	5	5	5	6	8	9	9	8	7	8	10	3	5	5	5	6	8	9	9	8	19.2	17.7
O00499;S4R418;F5H0W4;A0A0A0MT10;A0A087X188;Q9UBW5;P49418	O00499	7;1;1;1;1;1;1	7;1;1;1;1;1;1	7;1;1;1;1;1;1	Myc box-dependent-interacting protein 1	BIN1	sp|O00499|BIN1_HUMAN Myc box-dependent-interacting protein 1 OS=Homo sapiens GN=BIN1 PE=1 SV=1	7	7	7	7	4	5	4	4	6	6	5	6	5	4	4	5	4	5	4	4	6	6	5	6	5	4	4	5	4	5	4	4	6	6	5	6	5	4	4	5	16	16
O14530;F8WCJ3;B8ZZX4;F8WBV5;G3XAJ4	O14530;F8WCJ3;B8ZZX4	3;2;2;1;1	3;2;2;1;1	3;2;2;1;1	Thioredoxin domain-containing protein 9	TXNDC9	sp|O14530|TXND9_HUMAN Thioredoxin domain-containing protein 9 OS=Homo sapiens GN=TXNDC9 PE=1 SV=2;tr|F8WCJ3|F8WCJ3_HUMAN Thioredoxin domain-containing protein 9 OS=Homo sapiens GN=TXNDC9 PE=1 SV=1;tr|B8ZZX4|B8ZZX4_HUMAN Thioredoxin domain-containing protei	5	3	3	3	1	1	1	1	2	2	2	2	1	2	3	2	1	1	1	1	2	2	2	2	1	2	3	2	1	1	1	1	2	2	2	2	1	2	3	2	13.7	13.7
O14617;K7ERW8	O14617	8;1	8;1	8;1	AP-3 complex subunit delta-1	AP3D1	sp|O14617|AP3D1_HUMAN AP-3 complex subunit delta-1 OS=Homo sapiens GN=AP3D1 PE=1 SV=1	2	8	8	8	4	5	5	5	7	5	4	8	3	4	4	5	4	5	5	5	7	5	4	8	3	4	4	5	4	5	5	5	7	5	4	8	3	4	4	5	9.2	9.2
O14646;O14647	O14646	8;1	8;1	8;1	Chromodomain-helicase-DNA-binding protein 1	CHD1	sp|O14646|CHD1_HUMAN Chromodomain-helicase-DNA-binding protein 1 OS=Homo sapiens GN=CHD1 PE=1 SV=2	2	8	8	8	7	5	6	5	7	6	7	6	5	7	5	7	7	5	6	5	7	6	7	6	5	7	5	7	7	5	6	5	7	6	7	6	5	7	5	7	5	5
O14654;H3BTC1	O14654	75;5	75;5	75;5	Insulin receptor substrate 4	IRS4	sp|O14654|IRS4_HUMAN Insulin receptor substrate 4 OS=Homo sapiens GN=IRS4 PE=1 SV=1	2	75	75	75	71	73	73	71	71	73	72	70	70	72	71	71	71	73	73	71	71	73	72	70	70	72	71	71	71	73	73	71	71	73	72	70	70	72	71	71	68.1	68.1
O14737;K7ESJ4;K7EQA1;Q3HM38;X6R2P6	O14737;K7ESJ4;K7EQA1	3;2;2;1;1	3;2;2;1;1	3;2;2;1;1	Programmed cell death protein 5	PDCD5	sp|O14737|PDCD5_HUMAN Programmed cell death protein 5 OS=Homo sapiens GN=PDCD5 PE=1 SV=3;tr|K7ESJ4|K7ESJ4_HUMAN Programmed cell death protein 5 OS=Homo sapiens GN=PDCD5 PE=1 SV=1;tr|K7EQA1|K7EQA1_HUMAN Programmed cell death protein 5 OS=Homo sapiens GN=PDC	5	3	3	3	3	3	3	2	3	3	3	3	2	3	3	3	3	3	3	2	3	3	3	3	2	3	3	3	3	3	3	2	3	3	3	3	2	3	3	3	29.6	29.6
O14776	O14776	2	2	2	Transcription elongation regulator 1	TCERG1	sp|O14776|TCRG1_HUMAN Transcription elongation regulator 1 OS=Homo sapiens GN=TCERG1 PE=1 SV=2	1	2	2	2	2	2	2	2	2	2	2	2	2	2	2	1	2	2	2	2	2	2	2	2	2	2	2	1	2	2	2	2	2	2	2	2	2	2	2	1	2.2	2.2
O15042;H0Y8D9;E7EW00	O15042	39;17;15	39;17;15	2;1;1	U2 snRNP-associated SURP motif-containing protein	U2SURP	sp|O15042|SR140_HUMAN U2 snRNP-associated SURP motif-containing protein OS=Homo sapiens GN=U2SURP PE=1 SV=2	3	39	39	2	36	33	37	35	35	37	35	38	35	36	34	34	36	33	37	35	35	37	35	38	35	36	34	34	2	2	2	2	2	2	2	2	2	2	2	2	45.3	45.3
O15047;C9J2Z9	O15047	26;3	26;3	25;3	Histone-lysine N-methyltransferase SETD1A	SETD1A	sp|O15047|SET1A_HUMAN Histone-lysine N-methyltransferase SETD1A OS=Homo sapiens GN=SETD1A PE=1 SV=3	2	26	26	25	18	20	21	21	23	22	23	25	22	19	17	17	18	20	21	21	23	22	23	25	22	19	17	17	17	19	20	20	22	21	22	24	21	18	16	16	21.3	21.3
O15212;A2AB88	O15212;A2AB88	3;2	3;2	3;2	Prefoldin subunit 6	PFDN6	sp|O15212|PFD6_HUMAN Prefoldin subunit 6 OS=Homo sapiens GN=PFDN6 PE=1 SV=1;tr|A2AB88|A2AB88_HUMAN Prefoldin subunit 6 OS=Homo sapiens GN=PFDN6 PE=1 SV=1	2	3	3	3	2	1	2	1	1	2	1	1	1	1	2	0	2	1	2	1	1	2	1	1	1	1	2	0	2	1	2	1	1	2	1	1	1	1	2	0	27.1	27.1
O15479	O15479	1	1	1	Melanoma-associated antigen B2	MAGEB2	sp|O15479|MAGB2_HUMAN Melanoma-associated antigen B2 OS=Homo sapiens GN=MAGEB2 PE=1 SV=3	1	1	1	1	1	1	1	0	1	0	1	1	1	0	1	1	1	1	1	0	1	0	1	1	1	0	1	1	1	1	1	0	1	0	1	1	1	0	1	1	5	5
O43175;Q5SZU1	O43175;Q5SZU1	6;4	6;4	6;4	D-3-phosphoglycerate dehydrogenase	PHGDH	sp|O43175|SERA_HUMAN D-3-phosphoglycerate dehydrogenase OS=Homo sapiens GN=PHGDH PE=1 SV=4;tr|Q5SZU1|Q5SZU1_HUMAN D-3-phosphoglycerate dehydrogenase OS=Homo sapiens GN=PHGDH PE=1 SV=1	2	6	6	6	6	5	6	4	6	6	6	6	6	6	6	5	6	5	6	4	6	6	6	6	6	6	6	5	6	5	6	4	6	6	6	6	6	6	6	5	12.9	12.9
O43390;B4DT28	O43390;B4DT28	8;6	3;3	3;3	Heterogeneous nuclear ribonucleoprotein R	HNRNPR	sp|O43390|HNRPR_HUMAN Heterogeneous nuclear ribonucleoprotein R OS=Homo sapiens GN=HNRNPR PE=1 SV=1;tr|B4DT28|B4DT28_HUMAN Heterogeneous nuclear ribonucleoprotein R OS=Homo sapiens GN=HNRNPR PE=1 SV=1	2	8	3	3	5	4	5	7	5	6	7	5	7	6	5	5	2	1	2	2	1	1	2	1	2	1	1	1	2	1	2	2	1	1	2	1	2	1	1	1	13.6	6
O43491;E9PHY5;E9PK52;E9PII3;I6L9B1;Q6R5J7;Q6ZSX4;H0Y5B0;E9PMV8;E9PPC9;E9PQD2;E9PMG5;E9PN54;B2RB02;A8K968;A0A0A0MRA8;Q9Y2J2;E9PJP4;E9PQN0;J3KT37;E9PRG1;E9PIG0;J3QS55	O43491;E9PHY5;E9PK52;E9PII3;I6L9B1	13;12;11;9;7;6;4;4;3;2;2;2;2;2;2;2;2;1;1;1;1;1;1	13;12;11;9;7;6;4;4;3;2;2;2;2;2;2;2;2;1;1;1;1;1;1	13;12;11;9;7;6;4;4;3;2;2;2;2;2;2;2;2;1;1;1;1;1;1	Band 4.1-like protein 2	EPB41L2	sp|O43491|E41L2_HUMAN Band 4.1-like protein 2 OS=Homo sapiens GN=EPB41L2 PE=1 SV=1;tr|E9PHY5|E9PHY5_HUMAN Band 4.1-like protein 2 OS=Homo sapiens GN=EPB41L2 PE=1 SV=1;tr|E9PK52|E9PK52_HUMAN Band 4.1-like protein 2 OS=Homo sapiens GN=EPB41L2 PE=1 SV=1;tr|E9	23	13	13	13	11	11	9	7	10	10	8	8	7	9	7	8	11	11	9	7	10	10	8	8	7	9	7	8	11	11	9	7	10	10	8	8	7	9	7	8	16.8	16.8
O43678	O43678	1	1	1	NADH dehydrogenase [ubiquinone] 1 alpha subcomplex subunit 2	NDUFA2	sp|O43678|NDUA2_HUMAN NADH dehydrogenase [ubiquinone] 1 alpha subcomplex subunit 2 OS=Homo sapiens GN=NDUFA2 PE=1 SV=3	1	1	1	1	1	1	1	1	1	1	1	1	1	1	1	1	1	1	1	1	1	1	1	1	1	1	1	1	1	1	1	1	1	1	1	1	1	1	1	1	8.1	8.1
O43707;F5GXS2;H7C144;K7EJH8;K7EP19	O43707	21;8;5;4;3	21;8;5;4;3	10;3;2;3;1	Alpha-actinin-4	ACTN4	sp|O43707|ACTN4_HUMAN Alpha-actinin-4 OS=Homo sapiens GN=ACTN4 PE=1 SV=2	5	21	21	10	17	13	18	14	16	16	14	16	15	14	17	15	17	13	18	14	16	16	14	16	15	14	17	15	9	5	8	6	7	7	7	8	8	7	8	8	28.3	28.3
O43719;Q5H919;Q5H918	O43719	30;8;8	30;8;8	30;8;8	HIV Tat-specific factor 1	HTATSF1	sp|O43719|HTSF1_HUMAN HIV Tat-specific factor 1 OS=Homo sapiens GN=HTATSF1 PE=1 SV=1	3	30	30	30	27	30	30	22	28	30	29	29	21	27	26	26	27	30	30	22	28	30	29	29	21	27	26	26	27	30	30	22	28	30	29	29	21	27	26	26	44.9	44.9
O60361	O60361	6	1	1	Putative nucleoside diphosphate kinase	NME2P1	sp|O60361|NDK8_HUMAN Putative nucleoside diphosphate kinase OS=Homo sapiens GN=NME2P1 PE=5 SV=1	1	6	1	1	5	5	5	5	5	5	6	5	5	5	5	5	0	0	0	0	0	0	1	0	0	0	0	0	0	0	0	0	0	0	1	0	0	0	0	0	43.1	7.3
O60506;B7Z645;F6UXX1	O60506;B7Z645	12;9;4	12;9;4	7;5;2	Heterogeneous nuclear ribonucleoprotein Q	SYNCRIP	sp|O60506|HNRPQ_HUMAN Heterogeneous nuclear ribonucleoprotein Q OS=Homo sapiens GN=SYNCRIP PE=1 SV=2;tr|B7Z645|B7Z645_HUMAN Heterogeneous nuclear ribonucleoprotein Q OS=Homo sapiens GN=SYNCRIP PE=1 SV=1	3	12	12	7	8	8	9	11	10	10	11	9	11	10	11	9	8	8	9	11	10	10	11	9	11	10	11	9	5	5	6	6	6	5	6	5	6	5	7	5	23.9	23.9
O60749;D6RC15	O60749	11;5	11;5	9;5	Sorting nexin-2	SNX2	sp|O60749|SNX2_HUMAN Sorting nexin-2 OS=Homo sapiens GN=SNX2 PE=1 SV=2	2	11	11	9	9	8	9	8	9	10	7	10	8	6	8	6	9	8	9	8	9	10	7	10	8	6	8	6	7	6	7	6	7	8	6	8	6	4	6	4	25.6	25.6
O60783	O60783	1	1	1	28S ribosomal protein S14, mitochondrial	MRPS14	sp|O60783|RT14_HUMAN 28S ribosomal protein S14, mitochondrial OS=Homo sapiens GN=MRPS14 PE=1 SV=1	1	1	1	1	1	1	1	1	1	1	1	1	1	1	1	1	1	1	1	1	1	1	1	1	1	1	1	1	1	1	1	1	1	1	1	1	1	1	1	1	10.2	10.2
O60869	O60869	1	1	1	Endothelial differentiation-related factor 1	EDF1	sp|O60869|EDF1_HUMAN Endothelial differentiation-related factor 1 OS=Homo sapiens GN=EDF1 PE=1 SV=1	1	1	1	1	1	1	1	1	0	1	1	1	1	1	1	1	1	1	1	1	0	1	1	1	1	1	1	1	1	1	1	1	0	1	1	1	1	1	1	1	10.1	10.1
O60884;A0A087WT48;I3L320	O60884	11;3;1	11;3;1	11;3;1	DnaJ homolog subfamily A member 2	DNAJA2	sp|O60884|DNJA2_HUMAN DnaJ homolog subfamily A member 2 OS=Homo sapiens GN=DNAJA2 PE=1 SV=1	3	11	11	11	8	7	7	8	9	9	10	9	8	10	11	9	8	7	7	8	9	9	10	9	8	10	11	9	8	7	7	8	9	9	10	9	8	10	11	9	31.8	31.8
O60885;M0QZD9;M0QYW0;M0R0H4;Q58F21	O60885;M0QZD9	26;14;2;1;1	24;13;2;1;1	19;9;2;1;0	Bromodomain-containing protein 4	BRD4	sp|O60885|BRD4_HUMAN Bromodomain-containing protein 4 OS=Homo sapiens GN=BRD4 PE=1 SV=2;tr|M0QZD9|M0QZD9_HUMAN Bromodomain-containing protein 4 (Fragment) OS=Homo sapiens GN=BRD4 PE=1 SV=1	5	26	24	19	25	24	23	21	24	24	21	22	22	21	22	24	23	22	21	19	22	22	20	21	21	20	21	23	18	17	17	15	17	17	15	16	16	15	16	18	21.6	20.4
O75116;Q14DU5;E9PF63;D6REE7	O75116;Q14DU5;E9PF63	5;3;3;2	4;3;3;1	4;3;3;1	Rho-associated protein kinase 2	ROCK2	sp|O75116|ROCK2_HUMAN Rho-associated protein kinase 2 OS=Homo sapiens GN=ROCK2 PE=1 SV=4;tr|Q14DU5|Q14DU5_HUMAN ROCK2 protein OS=Homo sapiens GN=ROCK2 PE=1 SV=1;tr|E9PF63|E9PF63_HUMAN Rho-associated protein kinase 2 OS=Homo sapiens GN=ROCK2 PE=1 SV=1	4	5	4	4	3	1	2	3	4	3	3	3	4	4	2	4	2	1	2	3	3	3	3	3	4	3	2	3	2	1	2	3	3	3	3	3	4	3	2	3	4.6	4
O75348;F2Z307;O95670	O75348;F2Z307;O95670	2;1;1	2;1;1	2;1;1	V-type proton ATPase subunit G 1;V-type proton ATPase subunit G 2	ATP6V1G1;ATP6V1G2-DDX39B;ATP6V1G2	sp|O75348|VATG1_HUMAN V-type proton ATPase subunit G 1 OS=Homo sapiens GN=ATP6V1G1 PE=1 SV=3;tr|F2Z307|F2Z307_HUMAN Protein ATP6V1G2-DDX39B OS=Homo sapiens GN=ATP6V1G2-DDX39B PE=4 SV=1;sp|O95670|VATG2_HUMAN V-type proton ATPase subunit G 2 OS=Homo sapiens	3	2	2	2	1	1	1	0	0	0	0	1	0	0	1	0	1	1	1	0	0	0	0	1	0	0	1	0	1	1	1	0	0	0	0	1	0	0	1	0	22	22
O75369;F8WE98;E7EN95;Q14315	O75369;F8WE98;E7EN95;Q14315	2;1;1;1	2;1;1;1	1;0;1;0	Filamin-B;Filamin-C	FLNB;FLNA;FLNC	sp|O75369|FLNB_HUMAN Filamin-B OS=Homo sapiens GN=FLNB PE=1 SV=2;tr|F8WE98|F8WE98_HUMAN Filamin-A (Fragment) OS=Homo sapiens GN=FLNA PE=1 SV=2;tr|E7EN95|E7EN95_HUMAN Filamin-B OS=Homo sapiens GN=FLNB PE=1 SV=1;sp|Q14315|FLNC_HUMAN Filamin-C OS=Homo sapiens	4	2	2	1	1	2	2	1	1	2	0	1	1	2	2	0	1	2	2	1	1	2	0	1	1	2	2	0	0	1	1	0	0	1	0	0	0	1	1	0	0.9	0.9
O75400	O75400	3	3	3	Pre-mRNA-processing factor 40 homolog A	PRPF40A	sp|O75400|PR40A_HUMAN Pre-mRNA-processing factor 40 homolog A OS=Homo sapiens GN=PRPF40A PE=1 SV=2	1	3	3	3	0	1	2	2	2	3	2	3	2	2	3	2	0	1	2	2	2	3	2	3	2	2	3	2	0	1	2	2	2	3	2	3	2	2	3	2	3.7	3.7
Q5JRI1;O75494;Q6IQ42;R4GMP8	Q5JRI1;O75494	8;8;3;1	8;8;3;1	6;6;3;1	Serine/arginine-rich splicing factor 10	SRSF10	tr|Q5JRI1|Q5JRI1_HUMAN Serine/arginine-rich-splicing factor 10 OS=Homo sapiens GN=SRSF10 PE=1 SV=1;sp|O75494|SRS10_HUMAN Serine/arginine-rich splicing factor 10 OS=Homo sapiens GN=SRSF10 PE=1 SV=1	4	8	8	6	8	8	8	8	8	8	7	8	8	8	8	8	8	8	8	8	8	8	7	8	8	8	8	8	6	6	6	6	6	6	5	6	6	6	6	6	47.7	47.7
O75534;E9PLT0;E9PJK7;E9PKN4;E9PLD4;E9PNG3	O75534;E9PLT0	8;7;1;1;1;1	8;7;1;1;1;1	8;7;1;1;1;1	Cold shock domain-containing protein E1	CSDE1	sp|O75534|CSDE1_HUMAN Cold shock domain-containing protein E1 OS=Homo sapiens GN=CSDE1 PE=1 SV=2;tr|E9PLT0|E9PLT0_HUMAN Cold shock domain-containing protein E1 OS=Homo sapiens GN=CSDE1 PE=1 SV=1	6	8	8	8	4	3	4	5	4	5	6	4	4	6	4	3	4	3	4	5	4	5	6	4	4	6	4	3	4	3	4	5	4	5	6	4	4	6	4	3	12.9	12.9
O75592	O75592	1	1	1	E3 ubiquitin-protein ligase MYCBP2	MYCBP2	sp|O75592|MYCB2_HUMAN E3 ubiquitin-protein ligase MYCBP2 OS=Homo sapiens GN=MYCBP2 PE=1 SV=3	1	1	1	1	0	1	1	0	0	0	0	0	0	0	0	0	0	1	1	0	0	0	0	0	0	0	0	0	0	1	1	0	0	0	0	0	0	0	0	0	0.3	0.3
O75643;B4E0P5	O75643	15;3	15;3	15;3	U5 small nuclear ribonucleoprotein 200 kDa helicase	SNRNP200	sp|O75643|U520_HUMAN U5 small nuclear ribonucleoprotein 200 kDa helicase OS=Homo sapiens GN=SNRNP200 PE=1 SV=2	2	15	15	15	10	5	8	6	9	9	5	6	7	6	5	8	10	5	8	6	9	9	5	6	7	6	5	8	10	5	8	6	9	9	5	6	7	6	5	8	8.8	8.8
O75683	O75683	3	3	3	Surfeit locus protein 6	SURF6	sp|O75683|SURF6_HUMAN Surfeit locus protein 6 OS=Homo sapiens GN=SURF6 PE=1 SV=3	1	3	3	3	3	3	3	2	3	1	3	2	2	1	2	2	3	3	3	2	3	1	3	2	2	1	2	2	3	3	3	2	3	1	3	2	2	1	2	2	12.2	12.2
O75822;H0YGJ7;H0YLP3	O75822	3;1;1	3;1;1	3;1;1	Eukaryotic translation initiation factor 3 subunit J	EIF3J	sp|O75822|EIF3J_HUMAN Eukaryotic translation initiation factor 3 subunit J OS=Homo sapiens GN=EIF3J PE=1 SV=2	3	3	3	3	2	2	3	2	2	2	2	3	1	3	1	1	2	2	3	2	2	2	2	3	1	3	1	1	2	2	3	2	2	2	2	3	1	3	1	1	11.6	11.6
O75874;C9J4N6;P48735	O75874;C9J4N6;P48735	2;1;1	2;1;1	2;1;1	Isocitrate dehydrogenase [NADP] cytoplasmic;Isocitrate dehydrogenase [NADP], mitochondrial	IDH1;IDH2	sp|O75874|IDHC_HUMAN Isocitrate dehydrogenase [NADP] cytoplasmic OS=Homo sapiens GN=IDH1 PE=1 SV=2;tr|C9J4N6|C9J4N6_HUMAN Isocitrate dehydrogenase [NADP] cytoplasmic (Fragment) OS=Homo sapiens GN=IDH1 PE=1 SV=1;sp|P48735|IDHP_HUMAN Isocitrate dehydrogenase	3	2	2	2	1	1	1	2	1	1	2	1	1	1	0	1	1	1	1	2	1	1	2	1	1	1	0	1	1	1	1	2	1	1	2	1	1	1	0	1	5.3	5.3
O75937	O75937	1	1	1	DnaJ homolog subfamily C member 8	DNAJC8	sp|O75937|DNJC8_HUMAN DnaJ homolog subfamily C member 8 OS=Homo sapiens GN=DNAJC8 PE=1 SV=2	1	1	1	1	1	1	1	1	0	1	1	1	0	1	1	0	1	1	1	1	0	1	1	1	0	1	1	0	1	1	1	1	0	1	1	1	0	1	1	0	6.3	6.3
O76003	O76003	7	7	7	Glutaredoxin-3	GLRX3	sp|O76003|GLRX3_HUMAN Glutaredoxin-3 OS=Homo sapiens GN=GLRX3 PE=1 SV=2	1	7	7	7	6	7	7	6	6	5	7	6	6	7	7	7	6	7	7	6	6	5	7	6	6	7	7	7	6	7	7	6	6	5	7	6	6	7	7	7	23.9	23.9
O94776;E9PCS8;E7EQY4;E7EV10;Q9BTC8;D6W5A2;H0YIT0;E9PF88	O94776	40;5;5;5;5;4;1;1	40;5;5;5;5;4;1;1	36;2;2;2;2;2;0;0	Metastasis-associated protein MTA2	MTA2	sp|O94776|MTA2_HUMAN Metastasis-associated protein MTA2 OS=Homo sapiens GN=MTA2 PE=1 SV=1	8	40	40	36	40	40	40	40	39	39	40	39	39	38	39	37	40	40	40	40	39	39	40	39	39	38	39	37	36	36	36	36	35	35	36	35	35	34	35	34	60.9	60.9
O95104	O95104	11	8	8	Splicing factor, arginine/serine-rich 15	SCAF4	sp|O95104|SFR15_HUMAN Splicing factor, arginine/serine-rich 15 OS=Homo sapiens GN=SCAF4 PE=1 SV=3	1	11	8	8	11	10	10	11	11	11	11	11	10	10	10	10	8	7	7	8	8	8	8	8	8	7	8	7	8	7	7	8	8	8	8	8	8	7	8	7	15.9	13.6
O95391;A0A0C4DGD2;E5RGM7;E5RK41	O95391	9;1;1;1	9;1;1;1	9;1;1;1	Pre-mRNA-splicing factor SLU7	SLU7	sp|O95391|SLU7_HUMAN Pre-mRNA-splicing factor SLU7 OS=Homo sapiens GN=SLU7 PE=1 SV=2	4	9	9	9	7	8	8	7	9	6	7	9	9	9	6	9	7	8	8	7	9	6	7	9	9	9	6	9	7	8	8	7	9	6	7	9	9	9	6	9	23.5	23.5
O95394;A0A087WT27;J3KN95;D6RCQ8;D6RF77;D6RCD1;H0Y8I3;D6RC77;D6RIS6;H0Y987	O95394;A0A087WT27;J3KN95	5;4;4;2;2;1;1;1;1;1	5;4;4;2;2;1;1;1;1;1	5;4;4;2;2;1;1;1;1;1	Phosphoacetylglucosamine mutase	PGM3	sp|O95394|AGM1_HUMAN Phosphoacetylglucosamine mutase OS=Homo sapiens GN=PGM3 PE=1 SV=1;tr|A0A087WT27|A0A087WT27_HUMAN Phosphoacetylglucosamine mutase OS=Homo sapiens GN=PGM3 PE=1 SV=1;tr|J3KN95|J3KN95_HUMAN Phosphoacetylglucosamine mutase OS=Homo sapiens G	10	5	5	5	2	2	3	1	2	2	2	2	3	4	4	4	2	2	3	1	2	2	2	2	3	4	4	4	2	2	3	1	2	2	2	2	3	4	4	4	8.7	8.7
O95433;G3V438;H0YJG7;H0YJ63;G3V3W9;H0YJU2	O95433;G3V438;H0YJG7	6;3;3;2;2;2	6;3;3;2;2;2	6;3;3;2;2;2	Activator of 90 kDa heat shock protein ATPase homolog 1	AHSA1	sp|O95433|AHSA1_HUMAN Activator of 90 kDa heat shock protein ATPase homolog 1 OS=Homo sapiens GN=AHSA1 PE=1 SV=1;tr|G3V438|G3V438_HUMAN Activator of 90 kDa heat shock protein ATPase homolog 1 (Fragment) OS=Homo sapiens GN=AHSA1 PE=1 SV=1;tr|H0YJG7|H0YJG7_H	6	6	6	6	5	5	6	5	6	6	5	5	4	4	4	4	5	5	6	5	6	6	5	5	4	4	4	4	5	5	6	5	6	6	5	5	4	4	4	4	25.4	25.4
O95801	O95801	7	7	7	Tetratricopeptide repeat protein 4	TTC4	sp|O95801|TTC4_HUMAN Tetratricopeptide repeat protein 4 OS=Homo sapiens GN=TTC4 PE=1 SV=3	1	7	7	7	5	6	5	6	4	5	4	5	3	5	4	6	5	6	5	6	4	5	4	5	3	5	4	6	5	6	5	6	4	5	4	5	3	5	4	6	27.9	27.9
O96007	O96007	2	2	2	Molybdopterin synthase catalytic subunit	MOCS2	sp|O96007|MOC2B_HUMAN Molybdopterin synthase catalytic subunit OS=Homo sapiens GN=MOCS2 PE=1 SV=1	1	2	2	2	1	1	2	0	1	1	1	2	1	0	1	1	1	1	2	0	1	1	1	2	1	0	1	1	1	1	2	0	1	1	1	2	1	0	1	1	18.6	18.6
P00338;F5GXH2;F5GYU2;F5GXY2;F5H5J4;F5H6W8;F5GZQ4;F5H8H6;F5GXC7;F5GWW2;F5GXU1	P00338	9;4;4;4;3;3;2;1;1;1;1	8;4;4;4;3;3;2;1;1;1;1	8;4;4;4;3;3;2;1;1;1;1	L-lactate dehydrogenase A chain	LDHA	sp|P00338|LDHA_HUMAN L-lactate dehydrogenase A chain OS=Homo sapiens GN=LDHA PE=1 SV=2	11	9	8	8	8	8	8	9	8	9	8	8	8	9	9	9	7	7	7	8	7	8	7	7	7	8	8	8	7	7	7	8	7	8	7	7	7	8	8	8	31.9	28.3
P00374;B4DM58;C9JJ68;Q86XF0	P00374;B4DM58	13;10;4;4	13;10;4;4	13;10;4;4	Dihydrofolate reductase	DHFR	sp|P00374|DYR_HUMAN Dihydrofolate reductase OS=Homo sapiens GN=DHFR PE=1 SV=2;tr|B4DM58|B4DM58_HUMAN Dihydrofolate reductase OS=Homo sapiens GN=DHFR PE=1 SV=1	4	13	13	13	11	10	10	9	13	11	11	9	10	11	12	11	11	10	10	9	13	11	11	9	10	11	12	11	11	10	10	9	13	11	11	9	10	11	12	11	78.6	78.6
P00390;H0YC68;E5RI06	P00390	7;2;1	7;2;1	7;2;1	Glutathione reductase, mitochondrial	GSR	sp|P00390|GSHR_HUMAN Glutathione reductase, mitochondrial OS=Homo sapiens GN=GSR PE=1 SV=2	3	7	7	7	6	4	5	6	4	5	5	6	5	3	5	5	6	4	5	6	4	5	5	6	5	3	5	5	6	4	5	6	4	5	5	6	5	3	5	5	21.3	21.3
P00492	P00492	8	8	8	Hypoxanthine-guanine phosphoribosyltransferase	HPRT1	sp|P00492|HPRT_HUMAN Hypoxanthine-guanine phosphoribosyltransferase OS=Homo sapiens GN=HPRT1 PE=1 SV=2	1	8	8	8	7	8	7	7	8	6	6	6	7	6	7	6	7	8	7	7	8	6	6	6	7	6	7	6	7	8	7	7	8	6	6	6	7	6	7	6	43.6	43.6
P00505	P00505	2	2	2	Aspartate aminotransferase, mitochondrial	GOT2	sp|P00505|AATM_HUMAN Aspartate aminotransferase, mitochondrial OS=Homo sapiens GN=GOT2 PE=1 SV=3	1	2	2	2	2	1	1	0	1	0	2	1	2	2	1	1	2	1	1	0	1	0	2	1	2	2	1	1	2	1	1	0	1	0	2	1	2	2	1	1	5.8	5.8
P00558;P07205	P00558	12;2	12;2	12;2	Phosphoglycerate kinase 1	PGK1	sp|P00558|PGK1_HUMAN Phosphoglycerate kinase 1 OS=Homo sapiens GN=PGK1 PE=1 SV=3	2	12	12	12	10	7	8	6	7	7	9	9	8	6	7	7	10	7	8	6	7	7	9	9	8	6	7	7	10	7	8	6	7	7	9	9	8	6	7	7	33.3	33.3
P00918;E5RID5;E5RK37	P00918	10;4;4	10;4;4	10;4;4	Carbonic anhydrase 2	CA2	sp|P00918|CAH2_HUMAN Carbonic anhydrase 2 OS=Homo sapiens GN=CA2 PE=1 SV=2	3	10	10	10	8	10	9	9	9	10	9	9	9	8	10	9	8	10	9	9	9	10	9	9	9	8	10	9	8	10	9	9	9	10	9	9	9	8	10	9	48.5	48.5
Q5TCI8;P02545;A0A0C4DGC5;Q3BDU5	Q5TCI8;P02545;A0A0C4DGC5;Q3BDU5	3;3;2;2	2;2;1;1	2;2;1;1	Prelamin-A/C;Lamin-A/C	LMNA	tr|Q5TCI8|Q5TCI8_HUMAN Prelamin-A/C OS=Homo sapiens GN=LMNA PE=1 SV=1;sp|P02545|LMNA_HUMAN Prelamin-A/C OS=Homo sapiens GN=LMNA PE=1 SV=1;tr|A0A0C4DGC5|A0A0C4DGC5_HUMAN Prelamin-A/C (Fragment) OS=Homo sapiens GN=LMNA PE=1 SV=1;tr|Q3BDU5|Q3BDU5_HUMAN Prelam	4	3	2	2	2	3	2	2	2	3	2	3	3	2	1	0	1	2	1	2	1	2	1	2	2	1	1	0	1	2	1	2	1	2	1	2	2	1	1	0	7.1	5.5
P04075;H3BQN4;J3KPS3;H3BPS8;H3BUH7;H3BR04;H3BMQ8;H3BU78;H3BR68;P09972;A0A087WXX2;P05062	P04075;H3BQN4;J3KPS3;H3BPS8;H3BUH7;H3BR04;H3BMQ8	13;12;12;10;8;8;7;4;2;2;1;1	13;12;12;10;8;8;7;4;2;2;1;1	13;12;12;10;8;8;7;4;2;2;1;1	Fructose-bisphosphate aldolase A;Fructose-bisphosphate aldolase	ALDOA	sp|P04075|ALDOA_HUMAN Fructose-bisphosphate aldolase A OS=Homo sapiens GN=ALDOA PE=1 SV=2;tr|H3BQN4|H3BQN4_HUMAN Fructose-bisphosphate aldolase OS=Homo sapiens GN=ALDOA PE=1 SV=1;tr|J3KPS3|J3KPS3_HUMAN Fructose-bisphosphate aldolase OS=Homo sapiens GN=ALDO	12	13	13	13	10	10	11	11	12	10	11	11	9	13	9	9	10	10	11	11	12	10	11	11	9	13	9	9	10	10	11	11	12	10	11	11	9	13	9	9	45.3	45.3
P04259	P04259	28	1	1	Keratin, type II cytoskeletal 6B	KRT6B	sp|P04259|K2C6B_HUMAN Keratin, type II cytoskeletal 6B OS=Homo sapiens GN=KRT6B PE=1 SV=5	1	28	1	1	24	22	20	21	24	22	24	22	23	21	22	23	1	1	1	1	1	1	1	1	1	1	1	1	1	1	1	1	1	1	1	1	1	1	1	1	41.8	1.6
P04264;CON__P04264;CON__H-INV:HIT000016045	P04264;CON__P04264	37;36;4	37;36;4	21;20;0	Keratin, type II cytoskeletal 1	KRT1	sp|P04264|K2C1_HUMAN Keratin, type II cytoskeletal 1 OS=Homo sapiens GN=KRT1 PE=1 SV=6;	3	37	37	21	33	33	33	35	35	33	34	31	34	31	34	35	33	33	33	35	35	33	34	31	34	31	34	35	19	19	20	20	20	20	19	18	20	18	20	19	52.3	52.3
P04406;E7EUT5;O14556	P04406;E7EUT5	14;12;1	14;12;1	14;12;1	Glyceraldehyde-3-phosphate dehydrogenase	GAPDH	sp|P04406|G3P_HUMAN Glyceraldehyde-3-phosphate dehydrogenase OS=Homo sapiens GN=GAPDH PE=1 SV=3;tr|E7EUT5|E7EUT5_HUMAN Glyceraldehyde-3-phosphate dehydrogenase OS=Homo sapiens GN=GAPDH PE=1 SV=1	3	14	14	14	13	13	13	14	14	14	14	14	14	13	14	13	13	13	13	14	14	14	14	14	14	13	14	13	13	13	13	14	14	14	14	14	14	13	14	13	57.3	57.3
P05023;M0R116;B1AKY9;A0A0A0MT26;P13637;P50993;H0Y7C1;Q13733;Q5TC01;M0QXF2;E9PRA5;P20648;P54707;Q5TC02	P05023	22;9;9;9;9;9;7;4;2;2;2;2;2;1	22;9;9;9;9;9;7;4;2;2;2;2;2;1	22;9;9;9;9;9;7;4;2;2;2;2;2;1	Sodium/potassium-transporting ATPase subunit alpha-1	ATP1A1	sp|P05023|AT1A1_HUMAN Sodium/potassium-transporting ATPase subunit alpha-1 OS=Homo sapiens GN=ATP1A1 PE=1 SV=1	14	22	22	22	13	12	15	14	17	12	15	16	14	17	17	16	13	12	15	14	17	12	15	16	14	17	17	16	13	12	15	14	17	12	15	16	14	17	17	16	27.9	27.9
P05141;P12236;V9GYG0;P12235;Q9H0C2	P05141;P12236;V9GYG0;P12235	8;5;4;4;3	8;5;4;4;3	8;5;4;4;3	ADP/ATP translocase 2;ADP/ATP translocase 2, N-terminally processed;ADP/ATP translocase 3;ADP/ATP translocase 3, N-terminally processed;ADP/ATP translocase 1	SLC25A5;SLC25A6;SLC25A4	sp|P05141|ADT2_HUMAN ADP/ATP translocase 2 OS=Homo sapiens GN=SLC25A5 PE=1 SV=7;sp|P12236|ADT3_HUMAN ADP/ATP translocase 3 OS=Homo sapiens GN=SLC25A6 PE=1 SV=4;tr|V9GYG0|V9GYG0_HUMAN ADP/ATP translocase 1 OS=Homo sapiens GN=SLC25A4 PE=1 SV=1;sp|P12235|ADT1	5	8	8	8	6	6	7	3	6	7	6	6	7	6	5	5	6	6	7	3	6	7	6	6	7	6	5	5	6	6	7	3	6	7	6	6	7	6	5	5	27.9	27.9
P05165;Q5JVH2;H0Y5U0	P05165	13;1;1	13;1;1	13;1;1	Propionyl-CoA carboxylase alpha chain, mitochondrial	PCCA	sp|P05165|PCCA_HUMAN Propionyl-CoA carboxylase alpha chain, mitochondrial OS=Homo sapiens GN=PCCA PE=1 SV=4	3	13	13	13	8	4	8	5	4	7	6	8	10	5	7	5	8	4	8	5	4	7	6	8	10	5	7	5	8	4	8	5	4	7	6	8	10	5	7	5	24	24
P05386	P05386	1	1	1	60S acidic ribosomal protein P1	RPLP1	sp|P05386|RLA1_HUMAN 60S acidic ribosomal protein P1 OS=Homo sapiens GN=RPLP1 PE=1 SV=1	1	1	1	1	1	1	1	1	1	1	1	1	1	1	1	1	1	1	1	1	1	1	1	1	1	1	1	1	1	1	1	1	1	1	1	1	1	1	1	1	14	14
P05387;H0YDD8	P05387	5;2	5;2	5;2	60S acidic ribosomal protein P2	RPLP2	sp|P05387|RLA2_HUMAN 60S acidic ribosomal protein P2 OS=Homo sapiens GN=RPLP2 PE=1 SV=1	2	5	5	5	5	4	4	4	4	5	5	4	5	5	3	3	5	4	4	4	4	5	5	4	5	5	3	3	5	4	4	4	4	5	5	4	5	5	3	3	73.9	73.9
P05455;E9PGX9;E7ERC4;E9PFL9	P05455;E9PGX9;E7ERC4	6;3;3;1	6;3;3;1	6;3;3;1	Lupus La protein	SSB	sp|P05455|LA_HUMAN Lupus La protein OS=Homo sapiens GN=SSB PE=1 SV=2;tr|E9PGX9|E9PGX9_HUMAN Lupus La protein (Fragment) OS=Homo sapiens GN=SSB PE=1 SV=1;tr|E7ERC4|E7ERC4_HUMAN Lupus La protein (Fragment) OS=Homo sapiens GN=SSB PE=1 SV=1	4	6	6	6	3	2	3	4	3	2	4	3	3	2	3	3	3	2	3	4	3	2	4	3	3	2	3	3	3	2	3	4	3	2	4	3	3	2	3	3	17.6	17.6
P06733;K7EM90;F5H1C3;E5RI09;E5RG95;K7EPM1;K7EKN2;E5RGZ4;P13929	P06733;K7EM90	15;8;1;1;1;1;1;1;1	15;8;1;1;1;1;1;1;1	14;7;0;0;0;0;0;0;0	Alpha-enolase;Enolase	ENO1	sp|P06733|ENOA_HUMAN Alpha-enolase OS=Homo sapiens GN=ENO1 PE=1 SV=2;tr|K7EM90|K7EM90_HUMAN Alpha-enolase (Fragment) OS=Homo sapiens GN=ENO1 PE=1 SV=1	9	15	15	14	13	11	12	9	11	13	12	10	12	12	12	12	13	11	12	9	11	13	12	10	12	12	12	12	12	10	11	8	10	12	11	9	11	11	11	11	42.4	42.4
P06748;E5RGW4	P06748	4;1	4;1	4;1	Nucleophosmin	NPM1	sp|P06748|NPM_HUMAN Nucleophosmin OS=Homo sapiens GN=NPM1 PE=1 SV=2	2	4	4	4	4	3	3	3	3	3	4	3	4	3	4	3	4	3	3	3	3	3	4	3	4	3	4	3	4	3	3	3	3	3	4	3	4	3	4	3	18.7	18.7
P06753	P06753	11	1	0	Tropomyosin alpha-3 chain	TPM3	sp|P06753|TPM3_HUMAN Tropomyosin alpha-3 chain OS=Homo sapiens GN=TPM3 PE=1 SV=2	1	11	1	0	8	10	9	10	9	11	10	11	9	9	10	9	0	1	0	1	1	1	1	1	1	0	1	0	0	0	0	0	0	0	0	0	0	0	0	0	30.2	4.6
P07195;A8MW50;C9J7H8;F5H793;F5H5G7;F5H155;A0A087WUM2;G3XAP5;F5H245;Q6ZMR3;P07864	P07195;A8MW50;C9J7H8	15;9;8;7;1;1;1;1;1;1;1	15;9;8;7;1;1;1;1;1;1;1	14;8;8;7;0;0;0;0;0;0;0	L-lactate dehydrogenase B chain;L-lactate dehydrogenase	LDHB	sp|P07195|LDHB_HUMAN L-lactate dehydrogenase B chain OS=Homo sapiens GN=LDHB PE=1 SV=2;tr|A8MW50|A8MW50_HUMAN L-lactate dehydrogenase (Fragment) OS=Homo sapiens GN=LDHB PE=1 SV=1;tr|C9J7H8|C9J7H8_HUMAN L-lactate dehydrogenase B chain (Fragment) OS=Homo sap	11	15	15	14	13	13	13	15	15	14	15	15	14	15	15	15	13	13	13	15	15	14	15	15	14	15	15	15	12	12	12	14	14	13	14	14	13	14	14	14	48.2	48.2
P07384;E9PIA9;E9PLX0;E9PJJ3;E9PLC9;E9PMC6;E9PJA6;E9PSA6;E9PQB3;E9PRM1	P07384;E9PIA9;E9PLX0;E9PJJ3;E9PLC9;E9PMC6;E9PJA6;E9PSA6;E9PQB3;E9PRM1	2;1;1;1;1;1;1;1;1;1	2;1;1;1;1;1;1;1;1;1	2;1;1;1;1;1;1;1;1;1	Calpain-1 catalytic subunit	CAPN1	sp|P07384|CAN1_HUMAN Calpain-1 catalytic subunit OS=Homo sapiens GN=CAPN1 PE=1 SV=1;tr|E9PIA9|E9PIA9_HUMAN Calpain-1 catalytic subunit (Fragment) OS=Homo sapiens GN=CAPN1 PE=1 SV=1;tr|E9PLX0|E9PLX0_HUMAN Calpain-1 catalytic subunit (Fragment) OS=Homo sapie	10	2	2	2	2	1	1	2	2	1	2	2	2	2	2	2	2	1	1	2	2	1	2	2	2	2	2	2	2	1	1	2	2	1	2	2	2	2	2	2	3.2	3.2
Q5JP53;P07437;Q5ST81;A0A0B4J269;Q13509;A0A075B736;Q5SQY0;A6NNZ2;K7ESM5;Q9BUF5;G3V2A3;CON__ENSEMBL:ENSBTAP00000025008;Q9H4B7;M0R1I1;G3V5W4;G3V2R8;M0R042;G3V3R4;G3V2N6	Q5JP53;P07437;Q5ST81	17;17;14;8;8;6;6;6;5;5;3;3;3;1;1;1;1;1;1	17;17;14;8;8;6;6;6;5;5;3;3;3;1;1;1;1;1;1	3;3;1;0;0;0;0;0;0;0;0;0;0;0;0;0;0;0;0	Tubulin beta chain	TUBB	tr|Q5JP53|Q5JP53_HUMAN Tubulin beta chain OS=Homo sapiens GN=TUBB PE=1 SV=1;sp|P07437|TBB5_HUMAN Tubulin beta chain OS=Homo sapiens GN=TUBB PE=1 SV=2;tr|Q5ST81|Q5ST81_HUMAN Tubulin beta chain OS=Homo sapiens GN=TUBB PE=1 SV=1	19	17	17	3	14	13	14	10	14	12	13	13	13	12	12	13	14	13	14	10	14	12	13	13	13	12	12	13	3	2	3	1	2	2	3	2	2	2	2	2	54	54
P07737;K7EJ44;CON__P02584;I3L3D5	P07737;K7EJ44	5;4;2;1	5;4;2;1	5;4;2;1	Profilin-1	PFN1	sp|P07737|PROF1_HUMAN Profilin-1 OS=Homo sapiens GN=PFN1 PE=1 SV=2;tr|K7EJ44|K7EJ44_HUMAN Profilin OS=Homo sapiens GN=PFN1 PE=1 SV=1	4	5	5	5	4	3	3	4	4	4	5	5	4	4	4	5	4	3	3	4	4	4	5	5	4	4	4	5	4	3	3	4	4	4	5	5	4	4	4	5	43.6	43.6
P07741;H3BQF1;H3BQZ9;H3BQB1;H3BSW3	P07741;H3BQF1;H3BQZ9;H3BQB1	3;2;2;2;1	3;2;2;2;1	3;2;2;2;1	Adenine phosphoribosyltransferase	APRT	sp|P07741|APT_HUMAN Adenine phosphoribosyltransferase OS=Homo sapiens GN=APRT PE=1 SV=2;tr|H3BQF1|H3BQF1_HUMAN Adenine phosphoribosyltransferase (Fragment) OS=Homo sapiens GN=APRT PE=1 SV=7;tr|H3BQZ9|H3BQZ9_HUMAN Adenine phosphoribosyltransferase OS=Homo s	5	3	3	3	1	2	2	2	1	2	2	2	1	2	3	2	1	2	2	2	1	2	2	2	1	2	3	2	1	2	2	2	1	2	2	2	1	2	3	2	22.8	22.8
P07814;V9GYZ6	P07814;V9GYZ6	10;6	10;6	10;6	Bifunctional glutamate/proline--tRNA ligase;Glutamate--tRNA ligase;Proline--tRNA ligase	EPRS	sp|P07814|SYEP_HUMAN Bifunctional glutamate/proline--tRNA ligase OS=Homo sapiens GN=EPRS PE=1 SV=5;tr|V9GYZ6|V9GYZ6_HUMAN Bifunctional glutamate/proline--tRNA ligase (Fragment) OS=Homo sapiens GN=EPRS PE=1 SV=1	2	10	10	10	7	6	4	3	5	6	10	6	7	6	5	3	7	6	4	3	5	6	10	6	7	6	5	3	7	6	4	3	5	6	10	6	7	6	5	3	8.8	8.8
P07900;Q14568;G3V2J8;Q58FG0	P07900	35;7;6;5	23;3;4;2	22;3;4;2	Heat shock protein HSP 90-alpha	HSP90AA1	sp|P07900|HS90A_HUMAN Heat shock protein HSP 90-alpha OS=Homo sapiens GN=HSP90AA1 PE=1 SV=5	4	35	23	22	33	34	34	33	34	34	34	34	33	34	33	35	21	22	23	21	23	22	23	22	21	22	22	23	20	21	22	20	22	21	22	21	20	21	21	22	51.9	35.7
Q5TCU3;Q5TCU8;P07951;CON__Q3SX28	Q5TCU3;Q5TCU8;P07951;CON__Q3SX28	9;9;9;8	2;2;2;2	1;1;1;1	Tropomyosin beta chain	TPM2	tr|Q5TCU3|Q5TCU3_HUMAN Tropomyosin beta chain OS=Homo sapiens GN=TPM2 PE=1 SV=1;tr|Q5TCU8|Q5TCU8_HUMAN Tropomyosin beta chain OS=Homo sapiens GN=TPM2 PE=1 SV=1;sp|P07951|TPM2_HUMAN Tropomyosin beta chain OS=Homo sapiens GN=TPM2 PE=1 SV=1;	4	9	2	1	7	8	7	9	7	7	7	8	7	8	8	8	1	1	0	2	0	0	0	1	0	1	1	1	0	0	0	1	0	0	0	0	0	0	0	0	28.5	7.7
P08238;Q58FF7;F8W026;Q96GW1	P08238	35;14;1;1	35;14;1;1	19;6;0;0	Heat shock protein HSP 90-beta	HSP90AB1	sp|P08238|HS90B_HUMAN Heat shock protein HSP 90-beta OS=Homo sapiens GN=HSP90AB1 PE=1 SV=4	4	35	35	19	33	33	32	32	32	31	31	32	33	31	30	32	33	33	32	32	32	31	31	32	33	31	30	32	17	17	17	16	18	15	17	17	17	16	16	17	54	54
P08243	P08243	3	3	3	Asparagine synthetase [glutamine-hydrolyzing]	ASNS	sp|P08243|ASNS_HUMAN Asparagine synthetase [glutamine-hydrolyzing] OS=Homo sapiens GN=ASNS PE=1 SV=4	1	3	3	3	2	0	1	2	2	2	3	2	1	2	2	1	2	0	1	2	2	2	3	2	1	2	2	1	2	0	1	2	2	2	3	2	1	2	2	1	5.3	5.3
P08621;M0QYR1;M0QX04	P08621	23;10;2	23;10;2	23;10;2	U1 small nuclear ribonucleoprotein 70 kDa	SNRNP70	sp|P08621|RU17_HUMAN U1 small nuclear ribonucleoprotein 70 kDa OS=Homo sapiens GN=SNRNP70 PE=1 SV=2	3	23	23	23	18	18	19	20	21	19	20	22	22	18	21	21	18	18	19	20	21	19	20	22	22	18	21	21	18	18	19	20	21	19	20	22	22	18	21	21	48.1	48.1
P08708;H0YN88;A0A075B716;H0YN73	P08708;H0YN88;A0A075B716	3;2;2;1	3;2;2;1	3;2;2;1	40S ribosomal protein S17	RPS17	sp|P08708|RS17_HUMAN 40S ribosomal protein S17 OS=Homo sapiens GN=RPS17 PE=1 SV=2;tr|H0YN88|H0YN88_HUMAN 40S ribosomal protein S17 OS=Homo sapiens GN=RPS17 PE=1 SV=1;tr|A0A075B716|A0A075B716_HUMAN 40S ribosomal protein S17 OS=Homo sapiens GN=RPS17 PE=1 SV=	4	3	3	3	1	0	0	0	1	2	2	0	3	3	1	1	1	0	0	0	1	2	2	0	3	3	1	1	1	0	0	0	1	2	2	0	3	3	1	1	31.9	31.9
P08758;D6RBL5;D6RBE9;E9PHT9;D6RCN3	P08758;D6RBL5;D6RBE9;E9PHT9	8;6;5;4;1	8;6;5;4;1	8;6;5;4;1	Annexin A5;Annexin	ANXA5	sp|P08758|ANXA5_HUMAN Annexin A5 OS=Homo sapiens GN=ANXA5 PE=1 SV=2;tr|D6RBL5|D6RBL5_HUMAN Annexin OS=Homo sapiens GN=ANXA5 PE=1 SV=1;tr|D6RBE9|D6RBE9_HUMAN Annexin OS=Homo sapiens GN=ANXA5 PE=1 SV=1;tr|E9PHT9|E9PHT9_HUMAN Annexin OS=Homo sapiens GN=ANXA5	5	8	8	8	7	6	6	5	6	6	5	6	5	4	8	6	7	6	6	5	6	6	5	6	5	4	8	6	7	6	6	5	6	6	5	6	5	4	8	6	25.9	25.9
Q5T7C4;P09429;B2RPK0;P23497	Q5T7C4;P09429;B2RPK0	12;12;8;2	12;12;8;2	11;11;7;2	High mobility group protein B1;Putative high mobility group protein B1-like 1	HMGB1;HMGB1P1	tr|Q5T7C4|Q5T7C4_HUMAN High mobility group protein B1 OS=Homo sapiens GN=HMGB1 PE=1 SV=1;sp|P09429|HMGB1_HUMAN High mobility group protein B1 OS=Homo sapiens GN=HMGB1 PE=1 SV=3;sp|B2RPK0|HGB1A_HUMAN Putative high mobility group protein B1-like 1 OS=Homo sa	4	12	12	11	12	11	11	11	12	12	10	11	11	11	10	11	12	11	11	11	12	12	10	11	11	11	10	11	11	10	11	11	11	11	10	11	11	11	10	11	54.4	54.4
P09874	P09874	8	8	8	Poly [ADP-ribose] polymerase 1	PARP1	sp|P09874|PARP1_HUMAN Poly [ADP-ribose] polymerase 1 OS=Homo sapiens GN=PARP1 PE=1 SV=4	1	8	8	8	5	5	5	4	2	2	5	3	2	4	5	3	5	5	5	4	2	2	5	3	2	4	5	3	5	5	5	4	2	2	5	3	2	4	5	3	11.1	11.1
P09936;D6R956;D6R974;D6RE83;D6RF53	P09936;D6R956;D6R974;D6RE83	10;9;8;8;3	10;9;8;8;3	10;9;8;8;3	Ubiquitin carboxyl-terminal hydrolase isozyme L1;Ubiquitin carboxyl-terminal hydrolase	UCHL1	sp|P09936|UCHL1_HUMAN Ubiquitin carboxyl-terminal hydrolase isozyme L1 OS=Homo sapiens GN=UCHL1 PE=1 SV=2;tr|D6R956|D6R956_HUMAN Ubiquitin carboxyl-terminal hydrolase OS=Homo sapiens GN=UCHL1 PE=1 SV=1;tr|D6R974|D6R974_HUMAN Ubiquitin carboxyl-terminal hyd	5	10	10	10	8	8	9	8	10	8	8	8	8	9	8	8	8	8	9	8	10	8	8	8	8	9	8	8	8	8	9	8	10	8	8	8	8	9	8	8	49.3	49.3
P09960;B4DEH5	P09960	3;1	3;1	3;1	Leukotriene A-4 hydrolase	LTA4H	sp|P09960|LKHA4_HUMAN Leukotriene A-4 hydrolase OS=Homo sapiens GN=LTA4H PE=1 SV=2	2	3	3	3	2	2	2	2	1	1	1	1	2	1	2	0	2	2	2	2	1	1	1	1	2	1	2	0	2	2	2	2	1	1	1	1	2	1	2	0	7	7
P0DN76;Q01081;Q8WU68;M0QYK5;M0R2N4;K7EJH3;K7EJM7	P0DN76;Q01081	11;11;4;3;3;1;1	11;11;4;3;3;1;1	11;11;4;3;3;1;1	Splicing factor U2AF 35 kDa subunit	U2AF1	sp|P0DN76|U2AF5_HUMAN Splicing factor U2AF 35 kDa subunit-like protein OS=Homo sapiens GN=U2AF1L5 PE=1 SV=1;sp|Q01081|U2AF1_HUMAN Splicing factor U2AF 35 kDa subunit OS=Homo sapiens GN=U2AF1 PE=1 SV=3	7	11	11	11	11	11	11	11	10	10	11	10	10	11	11	9	11	11	11	11	10	10	11	10	10	11	11	9	11	11	11	11	10	10	11	10	10	11	11	9	55.8	55.8
P10412	P10412	8	1	1	Histone H1.4	HIST1H1E	sp|P10412|H14_HUMAN Histone H1.4 OS=Homo sapiens GN=HIST1H1E PE=1 SV=2	1	8	1	1	8	7	7	7	7	7	8	7	8	7	8	8	1	1	1	1	1	1	1	1	1	1	1	1	1	1	1	1	1	1	1	1	1	1	1	1	30.1	7.3
P10599	P10599	6	6	6	Thioredoxin	TXN	sp|P10599|THIO_HUMAN Thioredoxin OS=Homo sapiens GN=TXN PE=1 SV=3	1	6	6	6	5	5	5	5	5	6	5	5	5	5	5	6	5	5	5	5	5	6	5	5	5	5	5	6	5	5	5	5	5	6	5	5	5	5	5	6	48.6	48.6
P10768;X6RA14;H7BZT7;U3KQT1	P10768;X6RA14;H7BZT7	11;8;7;5	11;8;7;5	11;8;7;5	S-formylglutathione hydrolase	ESD	sp|P10768|ESTD_HUMAN S-formylglutathione hydrolase OS=Homo sapiens GN=ESD PE=1 SV=2;tr|X6RA14|X6RA14_HUMAN S-formylglutathione hydrolase OS=Homo sapiens GN=ESD PE=1 SV=1;tr|H7BZT7|H7BZT7_HUMAN S-formylglutathione hydrolase (Fragment) OS=Homo sapiens GN=ESD	4	11	11	11	8	8	8	7	8	9	7	9	6	7	7	8	8	8	8	7	8	9	7	9	6	7	7	8	8	8	8	7	8	9	7	9	6	7	7	8	55	55
P10809;E7EXB4;E7ESH4;C9JL25;C9JL19;C9JCQ4	P10809	9;3;3;2;1;1	9;3;3;2;1;1	9;3;3;2;1;1	60 kDa heat shock protein, mitochondrial	HSPD1	sp|P10809|CH60_HUMAN 60 kDa heat shock protein, mitochondrial OS=Homo sapiens GN=HSPD1 PE=1 SV=2	6	9	9	9	7	4	7	4	4	5	8	7	8	7	6	3	7	4	7	4	4	5	8	7	8	7	6	3	7	4	7	4	4	5	8	7	8	7	6	3	20.9	20.9
P11021	P11021	6	5	5	78 kDa glucose-regulated protein	HSPA5	sp|P11021|GRP78_HUMAN 78 kDa glucose-regulated protein OS=Homo sapiens GN=HSPA5 PE=1 SV=2	1	6	5	5	4	3	4	1	2	2	4	3	3	5	1	1	3	2	3	0	1	1	3	2	2	4	0	0	3	2	3	0	1	1	3	2	2	4	0	0	13.1	10.7
P11142;E9PKE3;E9PNE6;A8K7Q2;E9PS65;E9PN89;E9PM13;E9PLF4;E9PQQ4;E9PQK7;E9PK54;P54652;E9PPY6;E9PI65;E9PN25	P11142;E9PKE3;E9PNE6;A8K7Q2	35;34;27;22;16;15;13;11;10;10;10;9;8;8;7	35;34;27;22;16;15;13;11;10;10;10;9;8;8;7	28;27;21;17;12;13;10;9;9;9;9;4;7;6;6	Heat shock cognate 71 kDa protein	HSPA8	sp|P11142|HSP7C_HUMAN Heat shock cognate 71 kDa protein OS=Homo sapiens GN=HSPA8 PE=1 SV=1;tr|E9PKE3|E9PKE3_HUMAN Heat shock cognate 71 kDa protein OS=Homo sapiens GN=HSPA8 PE=1 SV=1;tr|E9PNE6|E9PNE6_HUMAN Heat shock cognate 71 kDa protein OS=Homo sapiens	15	35	35	28	32	35	34	33	34	34	34	31	33	34	33	34	32	35	34	33	34	34	34	31	33	34	33	34	25	28	27	26	27	27	27	25	26	27	27	27	55.1	55.1
P11172;E9PFD2	P11172;E9PFD2	2;1	2;1	2;1	Uridine 5-monophosphate synthase;Orotate phosphoribosyltransferase;Orotidine 5-phosphate decarboxylase	UMPS	sp|P11172|UMPS_HUMAN Uridine 5-monophosphate synthase OS=Homo sapiens GN=UMPS PE=1 SV=1;tr|E9PFD2|E9PFD2_HUMAN Uridine 5-monophosphate synthase OS=Homo sapiens GN=UMPS PE=1 SV=1	2	2	2	2	1	1	1	1	2	2	1	2	1	1	2	2	1	1	1	1	2	2	1	2	1	1	2	2	1	1	1	1	2	2	1	2	1	1	2	2	6	6
P11387;E5RIC7;Q969P6	P11387	4;1;1	4;1;1	4;1;1	DNA topoisomerase 1	TOP1	sp|P11387|TOP1_HUMAN DNA topoisomerase 1 OS=Homo sapiens GN=TOP1 PE=1 SV=2	3	4	4	4	3	2	2	2	1	2	3	2	3	1	1	1	3	2	2	2	1	2	3	2	3	1	1	1	3	2	2	2	1	2	3	2	3	1	1	1	5.6	5.6
P11498;E9PRE7;E9PS68	P11498	43;19;11	43;19;11	43;19;11	Pyruvate carboxylase, mitochondrial	PC	sp|P11498|PYC_HUMAN Pyruvate carboxylase, mitochondrial OS=Homo sapiens GN=PC PE=1 SV=2	3	43	43	43	39	38	41	41	41	41	40	37	39	37	39	41	39	38	41	41	41	41	40	37	39	37	39	41	39	38	41	41	41	41	40	37	39	37	39	41	52	52
P11766;H0YAG8;D6RFE4;D6RAY0;D6R9G2	P11766	13;6;4;3;3	13;6;4;3;3	13;6;4;3;3	Alcohol dehydrogenase class-3	ADH5	sp|P11766|ADHX_HUMAN Alcohol dehydrogenase class-3 OS=Homo sapiens GN=ADH5 PE=1 SV=4	5	13	13	13	8	9	11	9	11	12	12	12	10	10	13	11	8	9	11	9	11	12	12	12	10	10	13	11	8	9	11	9	11	12	12	12	10	10	13	11	33.2	33.2
P12004	P12004	6	6	6	Proliferating cell nuclear antigen	PCNA	sp|P12004|PCNA_HUMAN Proliferating cell nuclear antigen OS=Homo sapiens GN=PCNA PE=1 SV=1	1	6	6	6	5	6	5	3	5	5	5	6	6	6	4	4	5	6	5	3	5	5	5	6	6	6	4	4	5	6	5	3	5	5	5	6	6	6	4	4	34.9	34.9
P12277;G3V4N7;H0YJG0;G3V461;G3V2I1;P06732	P12277;G3V4N7	18;10;7;5;1;1	18;10;7;5;1;1	18;10;7;5;1;1	Creatine kinase B-type	CKB	sp|P12277|KCRB_HUMAN Creatine kinase B-type OS=Homo sapiens GN=CKB PE=1 SV=1;tr|G3V4N7|G3V4N7_HUMAN Creatine kinase B-type (Fragment) OS=Homo sapiens GN=CKB PE=1 SV=1	6	18	18	18	15	15	16	18	16	16	15	16	15	16	15	15	15	15	16	18	16	16	15	16	15	16	15	15	15	15	16	18	16	16	15	16	15	16	15	15	62.5	62.5
P12532;C9JSQ1;F8WCN3;P17540	P12532;C9JSQ1;F8WCN3;P17540	2;1;1;1	2;1;1;1	2;1;1;1	Creatine kinase U-type, mitochondrial;Creatine kinase S-type, mitochondrial	CKMT1A;CKMT1B;CKMT2	sp|P12532|KCRU_HUMAN Creatine kinase U-type, mitochondrial OS=Homo sapiens GN=CKMT1A PE=1 SV=1;tr|C9JSQ1|C9JSQ1_HUMAN Creatine kinase U-type, mitochondrial (Fragment) OS=Homo sapiens GN=CKMT1B PE=1 SV=1;tr|F8WCN3|F8WCN3_HUMAN Creatine kinase U-type, mitoch	4	2	2	2	1	1	1	1	1	1	1	2	1	1	1	1	1	1	1	1	1	1	1	2	1	1	1	1	1	1	1	1	1	1	1	2	1	1	1	1	6.2	6.2
P13010	P13010	2	2	2	X-ray repair cross-complementing protein 5	XRCC5	sp|P13010|XRCC5_HUMAN X-ray repair cross-complementing protein 5 OS=Homo sapiens GN=XRCC5 PE=1 SV=3	1	2	2	2	2	2	1	1	1	2	2	2	1	1	1	1	2	2	1	1	1	2	2	2	1	1	1	1	2	2	1	1	1	2	2	2	1	1	1	1	4	4
P13489;E9PMJ3;E9PLZ3;E9PIM9;H0YCR7	P13489	4;1;1;1;1	4;1;1;1;1	4;1;1;1;1	Ribonuclease inhibitor	RNH1	sp|P13489|RINI_HUMAN Ribonuclease inhibitor OS=Homo sapiens GN=RNH1 PE=1 SV=2	5	4	4	4	2	3	2	3	2	3	1	3	2	2	3	4	2	3	2	3	2	3	1	3	2	2	3	4	2	3	2	3	2	3	1	3	2	2	3	4	10	10
P13639;M0R0I6;K7EJ74;K7EP67;Q15029	P13639	31;1;1;1;1	31;1;1;1;1	31;1;1;1;1	Elongation factor 2	EEF2	sp|P13639|EF2_HUMAN Elongation factor 2 OS=Homo sapiens GN=EEF2 PE=1 SV=4	5	31	31	31	27	25	23	21	24	23	30	26	24	26	28	25	27	25	23	21	24	23	30	26	24	26	28	25	27	25	23	21	24	23	30	26	24	26	28	25	38.5	38.5
P13667	P13667	2	2	2	Protein disulfide-isomerase A4	PDIA4	sp|P13667|PDIA4_HUMAN Protein disulfide-isomerase A4 OS=Homo sapiens GN=PDIA4 PE=1 SV=2	1	2	2	2	1	0	0	0	0	0	1	0	0	0	0	0	1	0	0	0	0	0	1	0	0	0	0	0	1	0	0	0	0	0	1	0	0	0	0	0	3.3	3.3
P14174	P14174	3	3	3	Macrophage migration inhibitory factor	MIF	sp|P14174|MIF_HUMAN Macrophage migration inhibitory factor OS=Homo sapiens GN=MIF PE=1 SV=4	1	3	3	3	1	3	1	2	2	3	2	3	3	2	1	2	1	3	1	2	2	3	2	3	3	2	1	2	1	3	1	2	2	3	2	3	3	2	1	2	20.9	20.9
P14618;B4DNK4;H3BTN5;H3BQ34;H3BR70;H3BUW1;H3BTJ2;H3BT25;H3BU13;P30613	P14618;B4DNK4;H3BTN5;H3BQ34	19;15;14;10;8;7;7;6;1;1	19;15;14;10;8;7;7;6;1;1	19;15;14;10;8;7;7;6;1;1	Pyruvate kinase PKM;Pyruvate kinase	PKM	sp|P14618|KPYM_HUMAN Pyruvate kinase PKM OS=Homo sapiens GN=PKM PE=1 SV=4;tr|B4DNK4|B4DNK4_HUMAN Pyruvate kinase OS=Homo sapiens GN=PKM PE=1 SV=1;tr|H3BTN5|H3BTN5_HUMAN Pyruvate kinase (Fragment) OS=Homo sapiens GN=PKM PE=1 SV=1;tr|H3BQ34|H3BQ34_HUMAN Pyru	10	19	19	19	13	11	11	9	16	15	15	12	14	17	14	12	13	11	11	9	16	15	15	12	14	17	14	12	13	11	11	9	16	15	15	12	14	17	14	12	47.5	47.5
P14625	P14625	3	2	2	Endoplasmin	HSP90B1	sp|P14625|ENPL_HUMAN Endoplasmin OS=Homo sapiens GN=HSP90B1 PE=1 SV=1	1	3	2	2	2	1	1	1	1	2	2	2	2	2	2	1	1	0	0	0	0	1	1	1	1	1	1	0	1	0	0	0	0	1	1	1	1	1	1	0	4.5	3
P14923;C9JTX4;C9J826;C9JK18;C9JKY1	P14923;C9JTX4;C9J826;C9JK18;C9JKY1	6;4;4;4;4	6;4;4;4;4	6;4;4;4;4	Junction plakoglobin	JUP	sp|P14923|PLAK_HUMAN Junction plakoglobin OS=Homo sapiens GN=JUP PE=1 SV=3;tr|C9JTX4|C9JTX4_HUMAN Junction plakoglobin (Fragment) OS=Homo sapiens GN=JUP PE=1 SV=1;tr|C9J826|C9J826_HUMAN Junction plakoglobin (Fragment) OS=Homo sapiens GN=JUP PE=1 SV=7;tr|C9	5	6	6	6	5	4	4	6	4	3	3	2	3	3	4	4	5	4	4	6	4	3	3	2	3	3	4	4	5	4	4	6	4	3	3	2	3	3	4	4	10.2	10.2
P15374;A0A087WTB8;Q5TBK7	P15374;A0A087WTB8;Q5TBK7	6;5;3	6;5;3	6;5;3	Ubiquitin carboxyl-terminal hydrolase isozyme L3;Ubiquitin carboxyl-terminal hydrolase	UCHL3	sp|P15374|UCHL3_HUMAN Ubiquitin carboxyl-terminal hydrolase isozyme L3 OS=Homo sapiens GN=UCHL3 PE=1 SV=1;tr|A0A087WTB8|A0A087WTB8_HUMAN Ubiquitin carboxyl-terminal hydrolase OS=Homo sapiens GN=UCHL3 PE=1 SV=1;tr|Q5TBK7|Q5TBK7_HUMAN Ubiquitin carboxyl-term	3	6	6	6	5	4	4	4	4	5	4	4	4	4	4	5	5	4	4	4	4	5	4	4	4	4	4	5	5	4	4	4	4	5	4	4	4	4	4	5	37.4	37.4
P15531;E7ERL0;J3KPD9;E5RHP0;C9K028;F6XY72	P15531;E7ERL0;J3KPD9;E5RHP0	6;5;5;3;2;2	1;0;0;0;0;0	1;0;0;0;0;0	Nucleoside diphosphate kinase A	NME1;NME2	sp|P15531|NDKA_HUMAN Nucleoside diphosphate kinase A OS=Homo sapiens GN=NME1 PE=1 SV=1;tr|E7ERL0|E7ERL0_HUMAN Nucleoside diphosphate kinase A OS=Homo sapiens GN=NME1 PE=1 SV=1;tr|J3KPD9|J3KPD9_HUMAN Protein NME1-NME2 OS=Homo sapiens GN=NME1-NME2 PE=1 SV=1;	6	6	1	1	6	5	5	6	5	5	6	6	6	6	5	5	1	1	1	1	1	1	1	1	1	1	1	1	1	1	1	1	1	1	1	1	1	1	1	1	46.1	9.2
P15880;H0YEN5;E9PQD7;E9PMM9;I3L404;E9PM36;E9PPT0;H3BNG3;H0YE27	P15880;H0YEN5;E9PQD7;E9PMM9;I3L404;E9PM36	11;10;8;7;6;6;5;1;1	11;10;8;7;6;6;5;1;1	11;10;8;7;6;6;5;1;1	40S ribosomal protein S2	RPS2	sp|P15880|RS2_HUMAN 40S ribosomal protein S2 OS=Homo sapiens GN=RPS2 PE=1 SV=2;tr|H0YEN5|H0YEN5_HUMAN 40S ribosomal protein S2 (Fragment) OS=Homo sapiens GN=RPS2 PE=1 SV=1;tr|E9PQD7|E9PQD7_HUMAN 40S ribosomal protein S2 OS=Homo sapiens GN=RPS2 PE=1 SV=1;tr	9	11	11	11	9	9	9	9	11	10	10	10	9	10	9	9	9	9	9	9	11	10	10	10	9	10	9	9	9	9	9	9	11	10	10	10	9	10	9	9	41.6	41.6
P15924	P15924	60	60	60	Desmoplakin	DSP	sp|P15924|DESP_HUMAN Desmoplakin OS=Homo sapiens GN=DSP PE=1 SV=3	1	60	60	60	38	44	41	47	51	42	39	37	41	43	41	47	38	44	41	47	51	42	39	37	41	43	41	47	38	44	41	47	51	42	39	37	41	43	41	47	24.2	24.2
P16403;Q02539;P22492;P16401	P16403	9;4;3;2	9;4;3;2	2;0;0;0	Histone H1.2	HIST1H1C	sp|P16403|H12_HUMAN Histone H1.2 OS=Homo sapiens GN=HIST1H1C PE=1 SV=2	4	9	9	2	9	8	8	8	8	8	9	8	9	8	9	9	9	8	8	8	8	8	9	8	9	8	9	9	2	2	2	2	2	2	2	2	2	2	2	2	35.2	35.2
P16989;A0A0D9SEI8	P16989	10;3	6;1	6;1	Y-box-binding protein 3	YBX3	sp|P16989|YBOX3_HUMAN Y-box-binding protein 3 OS=Homo sapiens GN=YBX3 PE=1 SV=4	2	10	6	6	8	10	10	9	9	7	10	9	9	9	8	9	5	6	6	6	5	4	6	5	5	5	4	5	5	6	6	6	5	4	6	5	5	5	4	5	29.6	18.8
P17066;P48741	P17066;P48741	9;5	1;1	1;1	Heat shock 70 kDa protein 6;Putative heat shock 70 kDa protein 7	HSPA6;HSPA7	sp|P17066|HSP76_HUMAN Heat shock 70 kDa protein 6 OS=Homo sapiens GN=HSPA6 PE=1 SV=2;sp|P48741|HSP77_HUMAN Putative heat shock 70 kDa protein 7 OS=Homo sapiens GN=HSPA7 PE=5 SV=2	2	9	1	1	9	9	9	8	9	9	9	9	8	9	9	9	1	1	1	1	1	1	1	1	1	1	1	1	1	1	1	1	1	1	1	1	1	1	1	1	15.1	1.7
P17096	P17096	2	2	2	High mobility group protein HMG-I/HMG-Y	HMGA1	sp|P17096|HMGA1_HUMAN High mobility group protein HMG-I/HMG-Y OS=Homo sapiens GN=HMGA1 PE=1 SV=3	1	2	2	2	2	2	2	2	2	2	2	2	2	2	2	2	2	2	2	2	2	2	2	2	2	2	2	2	2	2	2	2	2	2	2	2	2	2	2	2	23.4	23.4
P17480	P17480	43	43	3	Nucleolar transcription factor 1	UBTF	sp|P17480|UBF1_HUMAN Nucleolar transcription factor 1 OS=Homo sapiens GN=UBTF PE=1 SV=1	1	43	43	3	40	40	40	40	42	41	40	42	39	42	41	42	40	40	40	40	42	41	40	42	39	42	41	42	3	3	3	3	3	3	3	3	2	3	2	2	49.5	49.5
P17812;Q9NRF8	P17812	12;2	12;2	12;2	CTP synthase 1	CTPS1	sp|P17812|PYRG1_HUMAN CTP synthase 1 OS=Homo sapiens GN=CTPS1 PE=1 SV=2	2	12	12	12	10	10	10	8	9	6	5	5	6	6	5	7	10	10	10	8	9	6	5	5	6	6	5	7	10	10	10	8	9	6	5	5	6	6	5	7	26.1	26.1
P17987;F5H282;E7EQR6;F5H726;F5GZI8;F5H676;F5H136;E7ERF2	P17987;F5H282;E7EQR6	3;2;2;1;1;1;1;1	3;2;2;1;1;1;1;1	3;2;2;1;1;1;1;1	T-complex protein 1 subunit alpha	TCP1	sp|P17987|TCPA_HUMAN T-complex protein 1 subunit alpha OS=Homo sapiens GN=TCP1 PE=1 SV=1;tr|F5H282|F5H282_HUMAN T-complex protein 1 subunit alpha OS=Homo sapiens GN=TCP1 PE=1 SV=1;tr|E7EQR6|E7EQR6_HUMAN T-complex protein 1 subunit alpha OS=Homo sapiens GN=	8	3	3	3	3	2	2	1	2	2	3	2	2	3	1	2	3	2	2	1	2	2	3	2	2	3	1	2	3	2	2	1	2	2	3	2	2	3	1	2	6.8	6.8
P18124;A8MUD9;C9JIJ5;C9JZ88	P18124;A8MUD9	11;9;3;2	11;9;3;2	11;9;3;2	60S ribosomal protein L7	RPL7	sp|P18124|RL7_HUMAN 60S ribosomal protein L7 OS=Homo sapiens GN=RPL7 PE=1 SV=1;tr|A8MUD9|A8MUD9_HUMAN 60S ribosomal protein L7 OS=Homo sapiens GN=RPL7 PE=1 SV=1	4	11	11	11	10	9	10	8	9	8	9	9	9	9	8	10	10	9	10	8	9	8	9	9	9	9	8	10	10	9	10	8	9	8	9	9	9	9	8	10	44.4	44.4
P18206;Q5JQ13	P18206;Q5JQ13	3;2	3;2	3;2	Vinculin	VCL	sp|P18206|VINC_HUMAN Vinculin OS=Homo sapiens GN=VCL PE=1 SV=4;tr|Q5JQ13|Q5JQ13_HUMAN Vinculin (Fragment) OS=Homo sapiens GN=VCL PE=1 SV=1	2	3	3	3	3	0	2	1	1	3	2	1	2	1	2	1	3	0	2	1	1	3	2	1	2	1	2	1	3	0	2	1	1	3	2	1	2	1	2	1	3.2	3.2
P18583;J3QSZ5	P18583;J3QSZ5	41;21	41;21	8;2	Protein SON	SON	sp|P18583|SON_HUMAN Protein SON OS=Homo sapiens GN=SON PE=1 SV=4;tr|J3QSZ5|J3QSZ5_HUMAN Protein SON OS=Homo sapiens GN=SON PE=1 SV=1	2	41	41	8	34	28	34	31	31	33	37	37	36	33	29	38	34	28	34	31	31	33	37	37	36	33	29	38	6	3	6	3	5	5	7	6	5	5	3	8	24.4	24.4
P18669;P15259;Q8N0Y7	P18669;P15259	8;4;3	8;4;3	8;4;3	Phosphoglycerate mutase 1;Phosphoglycerate mutase 2	PGAM1;PGAM2	sp|P18669|PGAM1_HUMAN Phosphoglycerate mutase 1 OS=Homo sapiens GN=PGAM1 PE=1 SV=2;sp|P15259|PGAM2_HUMAN Phosphoglycerate mutase 2 OS=Homo sapiens GN=PGAM2 PE=1 SV=3	3	8	8	8	8	7	7	7	7	7	8	8	8	6	6	7	8	7	7	7	7	7	8	8	8	6	6	7	8	7	7	7	7	7	8	8	8	6	6	7	44.1	44.1
P19338;H7BY16;C9JYW2;C9JLB1;C9J1H7;C9JWL1	P19338;H7BY16	18;12;2;2;2;2	18;12;2;2;2;2	18;12;2;2;2;2	Nucleolin	NCL	sp|P19338|NUCL_HUMAN Nucleolin OS=Homo sapiens GN=NCL PE=1 SV=3;tr|H7BY16|H7BY16_HUMAN Nucleolin (Fragment) OS=Homo sapiens GN=NCL PE=1 SV=7	6	18	18	18	18	18	18	17	15	17	16	16	15	17	16	16	18	18	18	17	15	17	16	16	15	17	16	16	18	18	18	17	15	17	16	16	15	17	16	16	24.4	24.4
P20042	P20042	12	12	12	Eukaryotic translation initiation factor 2 subunit 2	EIF2S2	sp|P20042|IF2B_HUMAN Eukaryotic translation initiation factor 2 subunit 2 OS=Homo sapiens GN=EIF2S2 PE=1 SV=2	1	12	12	12	6	7	9	7	7	8	7	8	8	6	7	6	6	7	9	7	7	8	7	8	8	6	7	6	6	7	9	7	7	8	7	8	8	6	7	6	42.3	42.3
P20073	P20073	2	2	2	Annexin A7	ANXA7	sp|P20073|ANXA7_HUMAN Annexin A7 OS=Homo sapiens GN=ANXA7 PE=1 SV=3	1	2	2	2	1	0	1	0	1	1	0	1	1	1	2	2	1	0	1	0	1	1	0	1	1	1	2	2	1	0	1	0	1	1	0	1	1	1	2	2	5.5	5.5
P22102;C9JBJ1;C9JTV6;F8WD69;C9JZG2;C9JKQ7;H7C366	P22102	9;4;4;4;3;3;1	9;4;4;4;3;3;1	9;4;4;4;3;3;1	Trifunctional purine biosynthetic protein adenosine-3;Phosphoribosylamine--glycine ligase;Phosphoribosylformylglycinamidine cyclo-ligase;Phosphoribosylglycinamide formyltransferase	GART	sp|P22102|PUR2_HUMAN Trifunctional purine biosynthetic protein adenosine-3 OS=Homo sapiens GN=GART PE=1 SV=1	7	9	9	9	7	6	5	7	7	5	7	6	5	6	7	6	7	6	5	7	7	5	7	6	5	6	7	6	7	6	5	7	7	5	7	6	5	6	7	6	10.7	10.7
P22314;Q5JRR6;Q5JRR9;Q5JRS0;Q5JRS1;Q5JRS3;Q5JRS2	P22314	12;4;2;2;1;1;1	12;4;2;2;1;1;1	12;4;2;2;1;1;1	Ubiquitin-like modifier-activating enzyme 1	UBA1	sp|P22314|UBA1_HUMAN Ubiquitin-like modifier-activating enzyme 1 OS=Homo sapiens GN=UBA1 PE=1 SV=3	7	12	12	12	9	8	10	7	10	8	8	10	10	8	8	8	9	8	10	7	10	8	8	10	10	8	8	8	9	8	10	7	10	8	8	10	10	8	8	8	17.4	17.4
P22626;A0A087WUI2	P22626;A0A087WUI2	6;4	5;3	5;3	Heterogeneous nuclear ribonucleoproteins A2/B1	HNRNPA2B1	sp|P22626|ROA2_HUMAN Heterogeneous nuclear ribonucleoproteins A2/B1 OS=Homo sapiens GN=HNRNPA2B1 PE=1 SV=2;tr|A0A087WUI2|A0A087WUI2_HUMAN Heterogeneous nuclear ribonucleoproteins A2/B1 OS=Homo sapiens GN=HNRNPA2B1 PE=1 SV=1	2	6	5	5	4	5	5	2	4	3	5	4	5	5	4	3	3	4	4	1	3	2	4	3	4	4	3	2	3	4	4	1	3	2	4	3	4	4	3	2	17.3	14.7
P23246;H0Y9K7	P23246	11;4	11;4	11;4	Splicing factor, proline- and glutamine-rich	SFPQ	sp|P23246|SFPQ_HUMAN Splicing factor, proline- and glutamine-rich OS=Homo sapiens GN=SFPQ PE=1 SV=2	2	11	11	11	9	8	6	8	8	6	11	6	10	8	7	4	9	8	6	8	8	6	11	6	10	8	7	4	9	8	6	8	8	6	11	6	10	8	7	4	22.1	22.1
P23284	P23284	3	3	3	Peptidyl-prolyl cis-trans isomerase B	PPIB	sp|P23284|PPIB_HUMAN Peptidyl-prolyl cis-trans isomerase B OS=Homo sapiens GN=PPIB PE=1 SV=2	1	3	3	3	2	0	0	0	0	0	0	2	0	1	0	0	2	0	0	0	0	0	0	2	0	1	0	0	2	0	0	0	0	0	0	2	0	1	0	0	15.3	15.3
P23396;F2Z2S8;H0YCJ7;E9PPU1;E9PL09;H0YF32;H0YEU2;E9PQ96;E9PJH4;E9PK82;E9PQX2;H0YES8;E9PSF4	P23396;F2Z2S8;H0YCJ7;E9PPU1;E9PL09;H0YF32;H0YEU2	9;7;7;7;7;6;5;4;4;4;2;1;1	9;7;7;7;7;6;5;4;4;4;2;1;1	9;7;7;7;7;6;5;4;4;4;2;1;1	40S ribosomal protein S3	RPS3	sp|P23396|RS3_HUMAN 40S ribosomal protein S3 OS=Homo sapiens GN=RPS3 PE=1 SV=2;tr|F2Z2S8|F2Z2S8_HUMAN 40S ribosomal protein S3 OS=Homo sapiens GN=RPS3 PE=1 SV=1;tr|H0YCJ7|H0YCJ7_HUMAN 40S ribosomal protein S3 (Fragment) OS=Homo sapiens GN=RPS3 PE=1 SV=1;tr	13	9	9	9	8	9	8	5	7	7	9	7	8	9	7	5	8	9	8	5	7	7	9	7	8	9	7	5	8	9	8	5	7	7	9	7	8	9	7	5	42	42
P23526	P23526	4	4	4	Adenosylhomocysteinase	AHCY	sp|P23526|SAHH_HUMAN Adenosylhomocysteinase OS=Homo sapiens GN=AHCY PE=1 SV=4	1	4	4	4	3	3	2	3	2	2	3	3	3	4	3	2	3	3	2	3	2	2	3	3	3	4	3	2	3	3	2	3	2	2	3	3	3	4	3	2	12	12
P23528;E9PP50;G3V1A4;E9PK25;E9PQB7;E9PLJ3;E9PS23;Q9Y281	P23528;E9PP50;G3V1A4;E9PK25;E9PQB7	13;12;11;11;8;6;6;4	13;12;11;11;8;6;6;4	12;11;10;10;7;6;6;3	Cofilin-1	CFL1	sp|P23528|COF1_HUMAN Cofilin-1 OS=Homo sapiens GN=CFL1 PE=1 SV=3;tr|E9PP50|E9PP50_HUMAN Cofilin-1 (Fragment) OS=Homo sapiens GN=CFL1 PE=1 SV=7;tr|G3V1A4|G3V1A4_HUMAN Cofilin 1 (Non-muscle), isoform CRA_a OS=Homo sapiens GN=CFL1 PE=1 SV=1;tr|E9PK25|E9PK25_H	8	13	13	12	12	11	11	10	12	13	11	11	10	12	13	11	12	11	11	10	12	13	11	11	10	12	13	11	11	10	10	10	12	12	10	11	10	11	12	10	74.1	74.1
P24534;C9JZW3;F8WF65;F2Z2G2	P24534	6;2;1;1	5;2;1;1	5;2;1;1	Elongation factor 1-beta	EEF1B2	sp|P24534|EF1B_HUMAN Elongation factor 1-beta OS=Homo sapiens GN=EEF1B2 PE=1 SV=3	4	6	5	5	6	6	5	5	5	5	6	4	5	5	6	5	5	5	4	4	4	4	5	4	4	4	5	4	5	5	4	4	4	4	5	4	4	4	5	4	37.3	32.4
P24666;G5E9R5;F2Z2Q9	P24666;G5E9R5	4;3;1	4;3;1	4;3;1	Low molecular weight phosphotyrosine protein phosphatase	ACP1	sp|P24666|PPAC_HUMAN Low molecular weight phosphotyrosine protein phosphatase OS=Homo sapiens GN=ACP1 PE=1 SV=3;tr|G5E9R5|G5E9R5_HUMAN Acid phosphatase 1, soluble, isoform CRA_d OS=Homo sapiens GN=ACP1 PE=1 SV=1	3	4	4	4	2	2	1	2	1	2	3	3	1	3	3	2	2	2	1	2	1	2	3	3	1	3	3	2	2	2	1	2	1	2	3	3	1	3	3	2	32.3	32.3
P25205;J3KQ69	P25205	3;1	3;1	3;1	DNA replication licensing factor MCM3	MCM3	sp|P25205|MCM3_HUMAN DNA replication licensing factor MCM3 OS=Homo sapiens GN=MCM3 PE=1 SV=3	2	3	3	3	1	3	0	0	1	1	1	1	1	1	1	1	1	3	0	0	1	1	1	1	1	1	1	1	1	3	0	0	1	1	1	1	1	1	1	1	3.6	3.6
P25398	P25398	3	3	3	40S ribosomal protein S12	RPS12	sp|P25398|RS12_HUMAN 40S ribosomal protein S12 OS=Homo sapiens GN=RPS12 PE=1 SV=3	1	3	3	3	2	2	2	1	1	1	2	3	1	2	2	2	2	2	2	1	1	1	2	3	1	2	2	2	2	2	2	1	1	1	2	3	1	2	2	2	24.2	24.2
P26038	P26038	10	4	4	Moesin	MSN	sp|P26038|MOES_HUMAN Moesin OS=Homo sapiens GN=MSN PE=1 SV=3	1	10	4	4	6	4	5	5	3	5	6	6	5	3	6	6	3	1	2	2	1	2	3	2	2	1	3	2	3	1	2	2	1	2	3	2	2	1	3	2	16.1	8
P26368;K7ENG2;K7ELP8	P26368;K7ENG2	16;12;2	16;12;2	16;12;2	Splicing factor U2AF 65 kDa subunit	U2AF2	sp|P26368|U2AF2_HUMAN Splicing factor U2AF 65 kDa subunit OS=Homo sapiens GN=U2AF2 PE=1 SV=4;tr|K7ENG2|K7ENG2_HUMAN Splicing factor U2AF 65 kDa subunit OS=Homo sapiens GN=U2AF2 PE=1 SV=1	3	16	16	16	16	16	16	16	16	15	16	16	15	15	16	16	16	16	16	16	16	15	16	16	15	15	16	16	16	16	16	16	16	15	16	16	15	15	16	16	49.5	49.5
P26373;J3QSB4;H3BTH3;J3KS98;H3BUK8	P26373;J3QSB4	10;6;2;2;1	10;6;2;2;1	10;6;2;2;1	60S ribosomal protein L13	RPL13	sp|P26373|RL13_HUMAN 60S ribosomal protein L13 OS=Homo sapiens GN=RPL13 PE=1 SV=4;tr|J3QSB4|J3QSB4_HUMAN 60S ribosomal protein L13 (Fragment) OS=Homo sapiens GN=RPL13 PE=1 SV=1	5	10	10	10	10	10	10	10	10	10	10	10	9	10	10	10	10	10	10	10	10	10	10	10	9	10	10	10	10	10	10	10	10	10	10	10	9	10	10	10	46.9	46.9
P26583;D6R9A6	P26583;D6R9A6	6;4	5;3	5;3	High mobility group protein B2	HMGB2	sp|P26583|HMGB2_HUMAN High mobility group protein B2 OS=Homo sapiens GN=HMGB2 PE=1 SV=2;tr|D6R9A6|D6R9A6_HUMAN High mobility group protein B2 (Fragment) OS=Homo sapiens GN=HMGB2 PE=1 SV=1	2	6	5	5	5	5	4	3	5	6	3	5	3	3	5	4	4	4	4	3	4	5	3	5	3	3	5	4	4	4	4	3	4	5	3	5	3	3	5	4	24.4	18.7
P26639;D6RCA5;D6R9F8;D6RDJ6;D6RBR8;D6RJ97;D6RHV7;D6RCS6;B7ZLP8;A2RTX5	P26639	24;5;5;5;2;1;1;1;1;1	24;5;5;5;2;1;1;1;1;1	24;5;5;5;2;1;1;1;1;1	Threonine--tRNA ligase, cytoplasmic	TARS	sp|P26639|SYTC_HUMAN Threonine--tRNA ligase, cytoplasmic OS=Homo sapiens GN=TARS PE=1 SV=3	10	24	24	24	20	15	18	16	22	22	20	22	20	18	19	19	20	15	18	16	22	22	20	22	20	18	19	19	20	15	18	16	22	22	20	22	20	18	19	19	39.7	39.7
P26640;A0A140T936;A0A140T954;A2ABF4;A0A0G2JJT9;A0A140T904	P26640;A0A140T936	7;6;3;2;2;1	7;6;3;2;2;1	7;6;3;2;2;1	Valine--tRNA ligase	VARS	sp|P26640|SYVC_HUMAN Valine--tRNA ligase OS=Homo sapiens GN=VARS PE=1 SV=4;tr|A0A140T936|A0A140T936_HUMAN Valine--tRNA ligase (Fragment) OS=Homo sapiens GN=VARS PE=1 SV=1	6	7	7	7	4	5	5	3	3	6	4	4	3	4	6	4	4	5	5	3	3	6	4	4	3	4	6	4	4	5	5	3	3	6	4	4	3	4	6	4	6.6	6.6
P26641	P26641	8	8	8	Elongation factor 1-gamma	EEF1G	sp|P26641|EF1G_HUMAN Elongation factor 1-gamma OS=Homo sapiens GN=EEF1G PE=1 SV=3	1	8	8	8	7	6	7	5	5	6	7	6	6	6	6	5	7	6	7	5	5	6	7	6	6	6	6	5	7	6	7	5	5	6	7	6	6	6	6	5	19.5	19.5
P27348;E9PG15	P27348;E9PG15	14;8	9;6	9;6	14-3-3 protein theta	YWHAQ	sp|P27348|1433T_HUMAN 14-3-3 protein theta OS=Homo sapiens GN=YWHAQ PE=1 SV=1;tr|E9PG15|E9PG15_HUMAN 14-3-3 protein theta (Fragment) OS=Homo sapiens GN=YWHAQ PE=1 SV=1	2	14	9	9	14	14	14	14	14	13	13	14	14	14	14	14	9	9	9	9	9	8	8	9	9	9	9	9	9	9	9	9	9	8	8	9	9	9	9	9	53.5	39.2
P27797;K7EJB9	P27797	3;1	3;1	3;1	Calreticulin	CALR	sp|P27797|CALR_HUMAN Calreticulin OS=Homo sapiens GN=CALR PE=1 SV=1	2	3	3	3	1	0	1	0	0	0	2	0	0	0	1	0	1	0	1	0	0	0	2	0	0	0	1	0	1	0	1	0	0	0	2	0	0	0	1	0	8.4	8.4
P27824;H0Y9Q7;D6RAU8;D6RB85;D6RDP7;D6RGY2;D6RAQ8;D6RHJ3;D6RD16;D6RFL1;H0Y9H1	P27824;H0Y9Q7	8;4;3;3;3;3;2;1;1;1;1	8;4;3;3;3;3;2;1;1;1;1	8;4;3;3;3;3;2;1;1;1;1	Calnexin	CANX	sp|P27824|CALX_HUMAN Calnexin OS=Homo sapiens GN=CANX PE=1 SV=2;tr|H0Y9Q7|H0Y9Q7_HUMAN Calnexin (Fragment) OS=Homo sapiens GN=CANX PE=1 SV=1	11	8	8	8	6	7	6	5	6	6	8	7	8	6	7	7	6	7	6	5	6	6	8	7	8	6	7	7	6	7	6	5	6	6	8	7	8	6	7	7	16.2	16.2
P27986;H0YBC2;E5RJY0;E5RGI8;H0YB27;E5RHI0;A0A0A0MRF9;P16885	P27986	25;9;7;3;3;2;1;1	25;9;7;3;3;2;1;1	22;7;5;3;3;2;1;1	Phosphatidylinositol 3-kinase regulatory subunit alpha	PIK3R1	sp|P27986|P85A_HUMAN Phosphatidylinositol 3-kinase regulatory subunit alpha OS=Homo sapiens GN=PIK3R1 PE=1 SV=2	8	25	25	22	22	22	22	20	16	19	18	20	20	20	21	21	22	22	22	20	16	19	18	20	20	20	21	21	19	19	19	17	13	16	15	17	17	17	18	18	40.9	40.9
P28066	P28066	3	3	3	Proteasome subunit alpha type-5	PSMA5	sp|P28066|PSA5_HUMAN Proteasome subunit alpha type-5 OS=Homo sapiens GN=PSMA5 PE=1 SV=3	1	3	3	3	3	2	3	3	3	2	1	3	3	2	3	2	3	2	3	3	3	2	1	3	3	2	3	2	3	2	3	3	3	2	1	3	3	2	3	2	19.1	19.1
Q5SYZ4;P29373	Q5SYZ4;P29373	2;2	2;2	2;2	Cellular retinoic acid-binding protein 2	CRABP2	tr|Q5SYZ4|Q5SYZ4_HUMAN Cellular retinoic acid-binding protein 2 (Fragment) OS=Homo sapiens GN=CRABP2 PE=1 SV=1;sp|P29373|RABP2_HUMAN Cellular retinoic acid-binding protein 2 OS=Homo sapiens GN=CRABP2 PE=1 SV=2	2	2	2	2	1	1	1	0	2	1	1	1	1	0	0	1	1	1	1	0	2	1	1	1	1	0	0	1	1	1	1	0	2	1	1	1	1	0	0	1	25.6	25.6
P29401;E9PFF2;A0A0B4J1R6;F8W888	P29401;E9PFF2;A0A0B4J1R6	4;3;3;1	4;3;3;1	4;3;3;1	Transketolase	TKT	sp|P29401|TKT_HUMAN Transketolase OS=Homo sapiens GN=TKT PE=1 SV=3;tr|E9PFF2|E9PFF2_HUMAN Transketolase OS=Homo sapiens GN=TKT PE=1 SV=1;tr|A0A0B4J1R6|A0A0B4J1R6_HUMAN Transketolase OS=Homo sapiens GN=TKT PE=1 SV=1	4	4	4	4	4	3	2	3	4	3	4	3	3	4	4	2	4	3	2	3	4	3	4	3	3	4	4	2	4	3	2	3	4	3	4	3	3	4	4	2	9.8	9.8
P29692;E9PRY8;E9PK01;E9PQZ1;E9PPR1;E9PL12;E9PQ49;E9PI39;A0A087X1X7;E9PMW7;E9PL71;E9PN91;E9PIZ1;H0YE72;H0YCK7;H0YE58;E9PK06;E9PKK3;E9PK72;E9PNW6;E9PQC9;E9PJD0	P29692;E9PRY8;E9PK01;E9PQZ1;E9PPR1;E9PL12;E9PQ49;E9PI39;A0A087X1X7;E9PMW7;E9PL71	10;9;8;7;6;6;6;6;6;5;5;4;4;4;4;3;3;2;2;1;1;1	10;9;8;7;6;6;6;6;6;5;5;4;4;4;4;3;3;2;2;1;1;1	9;8;7;6;6;6;6;6;6;5;5;4;4;3;4;2;3;2;2;1;1;1	Elongation factor 1-delta	EEF1D	sp|P29692|EF1D_HUMAN Elongation factor 1-delta OS=Homo sapiens GN=EEF1D PE=1 SV=5;tr|E9PRY8|E9PRY8_HUMAN Elongation factor 1-delta OS=Homo sapiens GN=EEF1D PE=1 SV=1;tr|E9PK01|E9PK01_HUMAN Elongation factor 1-delta (Fragment) OS=Homo sapiens GN=EEF1D PE=1	22	10	10	9	8	10	9	8	9	7	9	7	8	7	9	9	8	10	9	8	9	7	9	7	8	7	9	9	7	9	8	7	8	6	8	7	7	6	8	8	48	48
P30041	P30041	9	9	9	Peroxiredoxin-6	PRDX6	sp|P30041|PRDX6_HUMAN Peroxiredoxin-6 OS=Homo sapiens GN=PRDX6 PE=1 SV=3	1	9	9	9	6	5	4	8	5	5	6	5	6	7	5	7	6	5	4	8	5	5	6	5	6	7	5	7	6	5	4	8	5	5	6	5	6	7	5	7	54.9	54.9
P30050	P30050	5	5	5	60S ribosomal protein L12	RPL12	sp|P30050|RL12_HUMAN 60S ribosomal protein L12 OS=Homo sapiens GN=RPL12 PE=1 SV=1	1	5	5	5	4	4	3	2	3	4	2	3	3	3	2	3	4	4	3	2	3	4	2	3	3	3	2	3	4	4	3	2	3	4	2	3	3	3	2	3	45.5	45.5
P30085;Q5T0D2	P30085;Q5T0D2	7;5	7;5	7;5	UMP-CMP kinase	CMPK1	sp|P30085|KCY_HUMAN UMP-CMP kinase OS=Homo sapiens GN=CMPK1 PE=1 SV=3;tr|Q5T0D2|Q5T0D2_HUMAN UMP-CMP kinase OS=Homo sapiens GN=CMPK1 PE=1 SV=1	2	7	7	7	5	6	5	5	6	5	6	4	5	4	5	5	5	6	5	5	6	5	6	4	5	4	5	5	5	6	5	5	6	5	6	4	5	4	5	5	33.7	33.7
P30086	P30086	9	9	9	Phosphatidylethanolamine-binding protein 1;Hippocampal cholinergic neurostimulating peptide	PEBP1	sp|P30086|PEBP1_HUMAN Phosphatidylethanolamine-binding protein 1 OS=Homo sapiens GN=PEBP1 PE=1 SV=3	1	9	9	9	8	8	8	9	9	9	8	9	9	8	8	9	8	8	8	9	9	9	8	9	9	8	8	9	8	8	8	9	9	9	8	9	9	8	8	9	71.7	71.7
P30101	P30101	3	3	3	Protein disulfide-isomerase A3	PDIA3	sp|P30101|PDIA3_HUMAN Protein disulfide-isomerase A3 OS=Homo sapiens GN=PDIA3 PE=1 SV=4	1	3	3	3	2	0	0	0	0	0	3	2	0	0	0	0	2	0	0	0	0	0	3	2	0	0	0	0	2	0	0	0	0	0	3	2	0	0	0	0	9.1	9.1
P31153	P31153	2	2	2	S-adenosylmethionine synthase isoform type-2	MAT2A	sp|P31153|METK2_HUMAN S-adenosylmethionine synthase isoform type-2 OS=Homo sapiens GN=MAT2A PE=1 SV=1	1	2	2	2	2	1	1	1	1	1	1	1	1	1	2	1	2	1	1	1	1	1	1	1	1	1	2	1	2	1	1	1	1	1	1	1	1	1	2	1	7.6	7.6
P31689	P31689	23	23	23	DnaJ homolog subfamily A member 1	DNAJA1	sp|P31689|DNJA1_HUMAN DnaJ homolog subfamily A member 1 OS=Homo sapiens GN=DNAJA1 PE=1 SV=2	1	23	23	23	19	21	21	21	21	20	20	21	20	21	22	22	19	21	21	21	21	20	20	21	20	21	22	22	19	21	21	21	21	20	20	21	20	21	22	22	61.2	61.2
P31939;H7C1S2;F8WEF0;C9JLK0	P31939;H7C1S2	8;4;1;1	8;4;1;1	8;4;1;1	Bifunctional purine biosynthesis protein PURH;Phosphoribosylaminoimidazolecarboxamide formyltransferase;IMP cyclohydrolase	ATIC	sp|P31939|PUR9_HUMAN Bifunctional purine biosynthesis protein PURH OS=Homo sapiens GN=ATIC PE=1 SV=3;tr|H7C1S2|H7C1S2_HUMAN Bifunctional purine biosynthesis protein PURH (Fragment) OS=Homo sapiens GN=ATIC PE=1 SV=1	4	8	8	8	5	7	6	6	6	7	6	7	7	6	7	7	5	7	6	6	6	7	6	7	7	6	7	7	5	7	6	6	6	7	6	7	7	6	7	7	19.6	19.6
P31946;Q4VY20;Q4VY19;A0A0J9YWE8;P61981;A0A0J9YWZ2	P31946	10;4;4;4;4;2	5;2;2;2;1;1	5;2;2;2;1;1	14-3-3 protein beta/alpha;14-3-3 protein beta/alpha, N-terminally processed	YWHAB	sp|P31946|1433B_HUMAN 14-3-3 protein beta/alpha OS=Homo sapiens GN=YWHAB PE=1 SV=3	6	10	5	5	10	10	10	9	10	10	10	10	10	10	10	10	5	5	5	4	5	5	5	5	5	5	5	5	5	5	5	4	5	5	5	5	5	5	5	5	43.5	29.3
P31947	P31947	6	3	3	14-3-3 protein sigma	SFN	sp|P31947|1433S_HUMAN 14-3-3 protein sigma OS=Homo sapiens GN=SFN PE=1 SV=1	1	6	3	3	4	6	4	4	4	4	4	4	4	4	4	4	1	3	1	1	1	1	1	1	1	1	1	1	1	3	1	1	1	1	1	1	1	1	1	1	21.4	11.3
P31948;F5H783;F5GXD8;H0YGI8	P31948;F5H783	16;8;7;3	16;8;7;3	16;8;7;3	Stress-induced-phosphoprotein 1	STIP1	sp|P31948|STIP1_HUMAN Stress-induced-phosphoprotein 1 OS=Homo sapiens GN=STIP1 PE=1 SV=1;tr|F5H783|F5H783_HUMAN Stress-induced-phosphoprotein 1 OS=Homo sapiens GN=STIP1 PE=1 SV=1	4	16	16	16	10	12	13	11	13	13	11	12	9	11	14	13	10	12	13	11	13	13	11	12	9	11	14	13	10	12	13	11	13	13	11	12	9	11	14	13	28.9	28.9
P31949	P31949	5	5	5	Protein S100-A11;Protein S100-A11, N-terminally processed	S100A11	sp|P31949|S10AB_HUMAN Protein S100-A11 OS=Homo sapiens GN=S100A11 PE=1 SV=2	1	5	5	5	4	4	4	4	4	4	5	4	5	5	5	5	4	4	4	4	4	4	5	4	5	5	5	5	4	4	4	4	4	4	5	4	5	5	5	5	49.5	49.5
P32119;A6NIW5	P32119;A6NIW5	7;4	6;4	6;4	Peroxiredoxin-2	PRDX2	sp|P32119|PRDX2_HUMAN Peroxiredoxin-2 OS=Homo sapiens GN=PRDX2 PE=1 SV=5;tr|A6NIW5|A6NIW5_HUMAN Peroxiredoxin 2, isoform CRA_a OS=Homo sapiens GN=PRDX2 PE=1 SV=2	2	7	6	6	3	5	6	5	2	5	4	4	5	3	4	6	2	4	5	4	1	4	3	3	4	2	3	5	2	4	5	4	1	4	3	3	4	2	3	5	45.5	39.9
P32969;E7ESE0;D6RAN4;H0Y9V9;H0Y9R4	P32969;E7ESE0;D6RAN4;H0Y9V9	5;4;4;4;2	5;4;4;4;2	5;4;4;4;2	60S ribosomal protein L9	RPL9	sp|P32969|RL9_HUMAN 60S ribosomal protein L9 OS=Homo sapiens GN=RPL9 PE=1 SV=1;tr|E7ESE0|E7ESE0_HUMAN 60S ribosomal protein L9 (Fragment) OS=Homo sapiens GN=RPL9 PE=1 SV=1;tr|D6RAN4|D6RAN4_HUMAN 60S ribosomal protein L9 (Fragment) OS=Homo sapiens GN=RPL9 P	5	5	5	5	4	4	4	2	4	3	4	4	3	3	3	2	4	4	4	2	4	3	4	4	3	3	3	2	4	4	4	2	4	3	4	4	3	3	3	2	31.8	31.8
P33176;A0A0G2JMZ6;J3KNA1;O60282;Q12840	P33176	19;4;4;4;4	19;4;4;4;4	19;4;4;4;4	Kinesin-1 heavy chain	KIF5B	sp|P33176|KINH_HUMAN Kinesin-1 heavy chain OS=Homo sapiens GN=KIF5B PE=1 SV=1	5	19	19	19	8	8	9	12	12	10	13	13	13	12	12	14	8	8	9	12	12	10	13	13	13	12	12	14	8	8	9	12	12	10	13	13	13	12	12	14	27.4	27.4
P34932;A0A087WYC1;A0A087WTS8	P34932;A0A087WYC1;A0A087WTS8	27;21;15	27;21;15	25;19;13	Heat shock 70 kDa protein 4	HSPA4	sp|P34932|HSP74_HUMAN Heat shock 70 kDa protein 4 OS=Homo sapiens GN=HSPA4 PE=1 SV=4;tr|A0A087WYC1|A0A087WYC1_HUMAN Heat shock 70 kDa protein 4 OS=Homo sapiens GN=HSPA4 PE=1 SV=1;tr|A0A087WTS8|A0A087WTS8_HUMAN Heat shock 70 kDa protein 4 OS=Homo sapiens GN	3	27	27	25	26	22	22	22	22	20	20	20	21	21	24	22	26	22	22	22	22	20	20	20	21	21	24	22	25	21	21	22	21	20	19	19	19	20	22	21	43	43
P35268;K7EJT5;K7EP65;K7EKS7;K7ELC4;K7EMH1;K7ERI7	P35268;K7EJT5;K7EP65;K7EKS7;K7ELC4;K7EMH1;K7ERI7	3;2;2;2;2;2;2	3;2;2;2;2;2;2	3;2;2;2;2;2;2	60S ribosomal protein L22	RPL22	sp|P35268|RL22_HUMAN 60S ribosomal protein L22 OS=Homo sapiens GN=RPL22 PE=1 SV=2;tr|K7EJT5|K7EJT5_HUMAN 60S ribosomal protein L22 (Fragment) OS=Homo sapiens GN=RPL22 PE=1 SV=1;tr|K7EP65|K7EP65_HUMAN 60S ribosomal protein L22 (Fragment) OS=Homo sapiens GN=	7	3	3	3	3	2	2	2	2	2	2	2	2	2	2	2	3	2	2	2	2	2	2	2	2	2	2	2	3	2	2	2	2	2	2	2	2	2	2	2	39.1	39.1
P35269;M0QXD6;M0R0R9;M0R0Z3	P35269;M0QXD6;M0R0R9	11;9;7;4	11;9;7;4	11;9;7;4	General transcription factor IIF subunit 1	GTF2F1	sp|P35269|T2FA_HUMAN General transcription factor IIF subunit 1 OS=Homo sapiens GN=GTF2F1 PE=1 SV=2;tr|M0QXD6|M0QXD6_HUMAN General transcription factor IIF subunit 1 (Fragment) OS=Homo sapiens GN=GTF2F1 PE=1 SV=1;tr|M0R0R9|M0R0R9_HUMAN General transcriptio	4	11	11	11	9	9	9	7	9	9	9	9	7	9	10	11	9	9	9	7	9	9	9	9	7	9	10	11	9	9	9	7	9	9	9	9	7	9	10	11	26.7	26.7
P35527;CON__P35527;K7EQQ3	P35527;CON__P35527;K7EQQ3	30;29;15	30;29;15	29;28;15	Keratin, type I cytoskeletal 9	KRT9	sp|P35527|K1C9_HUMAN Keratin, type I cytoskeletal 9 OS=Homo sapiens GN=KRT9 PE=1 SV=3;;tr|K7EQQ3|K7EQQ3_HUMAN Keratin, type I cytoskeletal 9 OS=Homo sapiens GN=KRT9 PE=1 SV=1	3	30	30	29	29	29	28	30	29	29	30	28	28	28	28	30	29	29	28	30	29	29	30	28	28	28	28	30	28	28	27	29	28	28	29	27	27	27	27	29	60.8	60.8
P35579;Q5BKV1;B1AH99;A0A0C4DFM8;A0A087X0T3;P12883;P13535;Q9UKX3;Q9Y623;P13533;P12882;P11055;Q9UKX2;A7E2Y1	P35579	73;7;5;3;1;1;1;1;1;1;1;1;1;1	73;7;5;3;1;1;1;1;1;1;1;1;1;1	56;5;4;0;0;0;0;0;0;0;0;0;0;0	Myosin-9	MYH9	sp|P35579|MYH9_HUMAN Myosin-9 OS=Homo sapiens GN=MYH9 PE=1 SV=4	14	73	73	56	59	59	59	58	60	61	62	58	55	56	61	64	59	59	59	58	60	61	62	58	55	56	61	64	45	45	44	43	47	46	48	44	41	42	46	50	43.2	43.2
P35580;E7ERA5	P35580	68;8	56;6	51;6	Myosin-10	MYH10	sp|P35580|MYH10_HUMAN Myosin-10 OS=Homo sapiens GN=MYH10 PE=1 SV=3	2	68	56	51	52	54	55	54	50	52	48	57	58	56	59	56	42	45	45	44	42	42	39	47	48	47	48	46	37	40	41	39	38	37	35	43	44	42	44	41	39.9	33.6
P35659;B4DFG0;D6RDA2;D6R9L5;H0Y993;H0Y8X0	P35659;B4DFG0;D6RDA2;D6R9L5	6;5;3;3;2;1	6;5;3;3;2;1	6;5;3;3;2;1	Protein DEK	DEK	sp|P35659|DEK_HUMAN Protein DEK OS=Homo sapiens GN=DEK PE=1 SV=1;tr|B4DFG0|B4DFG0_HUMAN Protein DEK OS=Homo sapiens GN=DEK PE=1 SV=1;tr|D6RDA2|D6RDA2_HUMAN Protein DEK (Fragment) OS=Homo sapiens GN=DEK PE=1 SV=1;tr|D6R9L5|D6R9L5_HUMAN Protein DEK (Fragment	6	6	6	6	5	6	4	5	5	3	4	4	3	5	4	3	5	6	4	5	5	3	4	4	3	5	4	3	5	6	4	5	5	3	4	4	3	5	4	3	18.9	18.9
P35908;CON__P35908	P35908;CON__P35908	34;33	30;29	22;21	Keratin, type II cytoskeletal 2 epidermal	KRT2	sp|P35908|K22E_HUMAN Keratin, type II cytoskeletal 2 epidermal OS=Homo sapiens GN=KRT2 PE=1 SV=2;	2	34	30	22	29	30	31	32	34	33	32	30	29	33	32	32	25	26	27	28	30	29	28	26	25	29	28	28	19	20	21	21	22	22	20	20	19	21	22	20	65.6	62.4
P36405	P36405	2	2	2	ADP-ribosylation factor-like protein 3	ARL3	sp|P36405|ARL3_HUMAN ADP-ribosylation factor-like protein 3 OS=Homo sapiens GN=ARL3 PE=1 SV=2	1	2	2	2	0	1	0	1	0	0	1	2	1	1	2	2	0	1	0	1	0	0	1	2	1	1	2	2	0	1	0	1	0	0	1	2	1	1	2	2	12.6	12.6
P36507;G5E9C7	P36507;G5E9C7	2;1	2;1	2;1	Dual specificity mitogen-activated protein kinase kinase 2	MAP2K2	sp|P36507|MP2K2_HUMAN Dual specificity mitogen-activated protein kinase kinase 2 OS=Homo sapiens GN=MAP2K2 PE=1 SV=1;tr|G5E9C7|G5E9C7_HUMAN Dual-specificity mitogen-activated protein kinase kinase 2 OS=Homo sapiens GN=MAP2K2 PE=1 SV=1	2	2	2	2	1	1	1	0	0	0	0	0	1	0	1	1	1	1	1	0	0	0	0	0	1	0	1	1	1	1	1	0	0	0	0	0	1	0	1	1	7.5	7.5
P36578;H3BM89;H3BTP7;H3BU31	P36578;H3BM89	17;12;7;6	17;12;7;6	17;12;7;6	60S ribosomal protein L4	RPL4	sp|P36578|RL4_HUMAN 60S ribosomal protein L4 OS=Homo sapiens GN=RPL4 PE=1 SV=5;tr|H3BM89|H3BM89_HUMAN 60S ribosomal protein L4 OS=Homo sapiens GN=RPL4 PE=1 SV=1	4	17	17	17	17	17	17	16	16	17	17	17	16	17	16	17	17	17	17	16	16	17	17	17	16	17	16	17	17	17	17	16	16	17	17	17	16	17	16	17	44.5	44.5
P36871	P36871	2	2	2	Phosphoglucomutase-1	PGM1	sp|P36871|PGM1_HUMAN Phosphoglucomutase-1 OS=Homo sapiens GN=PGM1 PE=1 SV=3	1	2	2	2	0	0	1	1	1	1	2	1	0	2	1	1	0	0	1	1	1	1	2	1	0	2	1	1	0	0	1	1	1	1	2	1	0	2	1	1	5.5	5.5
P36915;A0A140T8Y2;A2AB27	P36915;A0A140T8Y2	9;5;4	9;5;4	9;5;4	Guanine nucleotide-binding protein-like 1	GNL1	sp|P36915|GNL1_HUMAN Guanine nucleotide-binding protein-like 1 OS=Homo sapiens GN=GNL1 PE=1 SV=2;tr|A0A140T8Y2|A0A140T8Y2_HUMAN Guanine nucleotide-binding protein-like 1 (Fragment) OS=Homo sapiens GN=GNL1 PE=1 SV=1	3	9	9	9	8	5	7	8	7	8	6	8	5	6	8	7	8	5	7	8	7	8	6	8	5	6	8	7	8	5	7	8	7	8	6	8	5	6	8	7	17.1	17.1
X6RJP6;P37802	X6RJP6;P37802	6;6	6;6	6;6	Transgelin-2	TAGLN2	tr|X6RJP6|X6RJP6_HUMAN Transgelin-2 (Fragment) OS=Homo sapiens GN=TAGLN2 PE=1 SV=1;sp|P37802|TAGL2_HUMAN Transgelin-2 OS=Homo sapiens GN=TAGLN2 PE=1 SV=3	2	6	6	6	4	4	5	4	4	5	6	4	5	5	4	3	4	4	5	4	4	5	6	4	5	5	4	3	4	4	5	4	4	5	6	4	5	5	4	3	37.4	37.4
P38432	P38432	2	2	2	Coilin	COIL	sp|P38432|COIL_HUMAN Coilin OS=Homo sapiens GN=COIL PE=1 SV=1	1	2	2	2	2	1	2	0	2	1	1	2	0	2	1	2	2	1	2	0	2	1	1	2	0	2	1	2	2	1	2	0	2	1	1	2	0	2	1	2	5.4	5.4
P38606;C9JA17;C9JVW8	P38606;C9JA17;C9JVW8	2;1;1	2;1;1	2;1;1	V-type proton ATPase catalytic subunit A	ATP6V1A	sp|P38606|VATA_HUMAN V-type proton ATPase catalytic subunit A OS=Homo sapiens GN=ATP6V1A PE=1 SV=2;tr|C9JA17|C9JA17_HUMAN V-type proton ATPase catalytic subunit A (Fragment) OS=Homo sapiens GN=ATP6V1A PE=1 SV=7;tr|C9JVW8|C9JVW8_HUMAN V-type proton ATPase c	3	2	2	2	0	0	2	0	0	0	1	1	1	0	0	1	0	0	2	0	0	0	1	1	1	0	0	1	0	0	2	0	0	0	1	1	1	0	0	1	5.8	5.8
P38646	P38646	3	2	2	Stress-70 protein, mitochondrial	HSPA9	sp|P38646|GRP75_HUMAN Stress-70 protein, mitochondrial OS=Homo sapiens GN=HSPA9 PE=1 SV=2	1	3	2	2	1	1	1	1	1	1	3	1	3	2	1	1	0	0	0	0	0	0	2	1	2	1	1	0	0	0	0	0	0	0	2	1	2	1	1	0	4.4	3.4
P39019;M0R2L9;M0QXK4;M0QYF7;M0R140;A0A075B6E2	P39019;M0R2L9;M0QXK4;M0QYF7;M0R140	5;3;3;3;3;2	5;3;3;3;3;2	5;3;3;3;3;2	40S ribosomal protein S19	RPS19	sp|P39019|RS19_HUMAN 40S ribosomal protein S19 OS=Homo sapiens GN=RPS19 PE=1 SV=2;tr|M0R2L9|M0R2L9_HUMAN 40S ribosomal protein S19 (Fragment) OS=Homo sapiens GN=RPS19 PE=1 SV=1;tr|M0QXK4|M0QXK4_HUMAN 40S ribosomal protein S19 (Fragment) OS=Homo sapiens GN=	6	5	5	5	3	4	4	3	3	3	3	4	4	3	3	4	3	4	4	3	3	3	3	4	4	3	3	4	3	4	4	3	3	3	3	4	4	3	3	4	33.1	33.1
P39023;G5E9G0;B5MCW2;H7C422;H7C3M2;F8WCR1;Q92901	P39023;G5E9G0;B5MCW2;H7C422	13;11;7;7;6;4;1	13;11;7;7;6;4;1	13;11;7;7;6;4;1	60S ribosomal protein L3	RPL3	sp|P39023|RL3_HUMAN 60S ribosomal protein L3 OS=Homo sapiens GN=RPL3 PE=1 SV=2;tr|G5E9G0|G5E9G0_HUMAN 60S ribosomal protein L3 OS=Homo sapiens GN=RPL3 PE=1 SV=1;tr|B5MCW2|B5MCW2_HUMAN 60S ribosomal protein L3 (Fragment) OS=Homo sapiens GN=RPL3 PE=1 SV=1;tr	7	13	13	13	11	11	11	9	12	10	12	11	11	13	12	8	11	11	11	9	12	10	12	11	11	13	12	8	11	11	11	9	12	10	12	11	11	13	12	8	35.7	35.7
P39748;I3L3E9;F5H1Y3	P39748;I3L3E9;F5H1Y3	4;2;2	4;2;2	4;2;2	Flap endonuclease 1	FEN1	sp|P39748|FEN1_HUMAN Flap endonuclease 1 OS=Homo sapiens GN=FEN1 PE=1 SV=1;tr|I3L3E9|I3L3E9_HUMAN Flap endonuclease 1 (Fragment) OS=Homo sapiens GN=FEN1 PE=1 SV=1;tr|F5H1Y3|F5H1Y3_HUMAN Flap endonuclease 1 (Fragment) OS=Homo sapiens GN=FEN1 PE=1 SV=1	3	4	4	4	2	4	3	3	3	4	4	4	3	4	4	4	2	4	3	3	3	4	4	4	3	4	4	4	2	4	3	3	3	4	4	4	3	4	4	4	15.3	15.3
P40222	P40222	10	10	10	Alpha-taxilin	TXLNA	sp|P40222|TXLNA_HUMAN Alpha-taxilin OS=Homo sapiens GN=TXLNA PE=1 SV=3	1	10	10	10	7	9	7	7	8	8	8	9	8	8	8	8	7	9	7	7	8	8	8	9	8	8	8	8	7	9	7	7	8	8	8	9	8	8	8	8	23.3	23.3
P40227	P40227	2	2	2	T-complex protein 1 subunit zeta	CCT6A	sp|P40227|TCPZ_HUMAN T-complex protein 1 subunit zeta OS=Homo sapiens GN=CCT6A PE=1 SV=3	1	2	2	2	0	0	1	0	0	1	1	2	1	1	1	0	0	0	1	0	0	1	1	2	1	1	1	0	0	0	1	0	0	1	1	2	1	1	1	0	5.8	5.8
P40429;M0QYS1;Q8J015;Q6NVV1;M0QZU1;A0A096LPE0	P40429;M0QYS1;Q8J015;Q6NVV1	6;5;4;3;1;1	6;5;4;3;1;1	6;5;4;3;1;1	60S ribosomal protein L13a;Putative 60S ribosomal protein L13a protein RPL13AP3	RPL13A;RPL13a;RPL13AP3	sp|P40429|RL13A_HUMAN 60S ribosomal protein L13a OS=Homo sapiens GN=RPL13A PE=1 SV=2;tr|M0QYS1|M0QYS1_HUMAN 60S ribosomal protein L13a (Fragment) OS=Homo sapiens GN=RPL13A PE=1 SV=2;tr|Q8J015|Q8J015_HUMAN 60S ribosomal protein L13a OS=Homo sapiens GN=RPL13	6	6	6	6	6	6	6	6	6	6	6	6	6	6	6	6	6	6	6	6	6	6	6	6	6	6	6	6	6	6	6	6	6	6	6	6	6	6	6	6	30	30
P40926;G3XAL0	P40926;G3XAL0	4;3	4;3	4;3	Malate dehydrogenase, mitochondrial;Malate dehydrogenase	MDH2	sp|P40926|MDHM_HUMAN Malate dehydrogenase, mitochondrial OS=Homo sapiens GN=MDH2 PE=1 SV=3;tr|G3XAL0|G3XAL0_HUMAN Malate dehydrogenase OS=Homo sapiens GN=MDH2 PE=1 SV=1	2	4	4	4	3	2	2	0	1	2	3	3	3	3	4	1	3	2	2	0	1	2	3	3	3	3	4	1	3	2	2	0	1	2	3	3	3	3	4	1	12.7	12.7
P41227;C9JN83;F8W808;A8MWP7;C9JW55;Q9BSU3;H0Y8T0	P41227;C9JN83;F8W808;A8MWP7	6;3;3;3;2;2;1	6;3;3;3;2;2;1	6;3;3;3;2;2;1	N-alpha-acetyltransferase 10	NAA10	sp|P41227|NAA10_HUMAN N-alpha-acetyltransferase 10 OS=Homo sapiens GN=NAA10 PE=1 SV=1;tr|C9JN83|C9JN83_HUMAN N-alpha-acetyltransferase 10 (Fragment) OS=Homo sapiens GN=NAA10 PE=1 SV=1;tr|F8W808|F8W808_HUMAN N-alpha-acetyltransferase 10 OS=Homo sapiens GN=N	7	6	6	6	4	4	4	3	5	4	5	6	6	5	5	6	4	4	4	3	5	4	5	6	6	5	5	6	4	4	4	3	5	4	5	6	6	5	5	6	31.9	31.9
P41250	P41250	2	2	2	Glycine--tRNA ligase	GARS	sp|P41250|SYG_HUMAN Glycine--tRNA ligase OS=Homo sapiens GN=GARS PE=1 SV=3	1	2	2	2	2	1	2	2	2	0	2	2	2	2	2	1	2	1	2	2	2	0	2	2	2	2	2	1	2	1	2	2	2	0	2	2	2	2	2	1	3.2	3.2
P42568	P42568	6	6	6	Protein AF-9	MLLT3	sp|P42568|AF9_HUMAN Protein AF-9 OS=Homo sapiens GN=MLLT3 PE=1 SV=2	1	6	6	6	4	4	5	4	6	4	5	6	4	4	3	3	4	4	5	4	6	4	5	6	4	4	3	3	4	4	5	4	6	4	5	6	4	4	3	3	14.8	14.8
P42766;F2Z388	P42766;F2Z388	3;2	3;2	3;2	60S ribosomal protein L35	RPL35	sp|P42766|RL35_HUMAN 60S ribosomal protein L35 OS=Homo sapiens GN=RPL35 PE=1 SV=2;tr|F2Z388|F2Z388_HUMAN 60S ribosomal protein L35 OS=Homo sapiens GN=RPL35 PE=1 SV=1	2	3	3	3	3	3	3	3	3	3	3	3	3	3	2	3	3	3	3	3	3	3	3	3	3	3	2	3	3	3	3	3	3	3	3	3	3	3	2	3	21.1	21.1
P43487;C9JJ34;F6WQW2;C9JXG8;C9JGV6;C9JDM3;C9JIC6	P43487;C9JJ34;F6WQW2;C9JXG8;C9JGV6	5;4;4;3;3;2;1	5;4;4;3;3;2;1	5;4;4;3;3;2;1	Ran-specific GTPase-activating protein	RANBP1	sp|P43487|RANG_HUMAN Ran-specific GTPase-activating protein OS=Homo sapiens GN=RANBP1 PE=1 SV=1;tr|C9JJ34|C9JJ34_HUMAN Ran-specific GTPase-activating protein (Fragment) OS=Homo sapiens GN=RANBP1 PE=1 SV=1;tr|F6WQW2|F6WQW2_HUMAN Ran-specific GTPase-activati	7	5	5	5	4	4	5	5	5	3	4	5	4	4	4	3	4	4	5	5	5	3	4	5	4	4	4	3	4	4	5	5	5	3	4	5	4	4	4	3	43.8	43.8
P45973;F8VNY3	P45973;F8VNY3	3;2	3;2	3;2	Chromobox protein homolog 5	CBX5	sp|P45973|CBX5_HUMAN Chromobox protein homolog 5 OS=Homo sapiens GN=CBX5 PE=1 SV=1;tr|F8VNY3|F8VNY3_HUMAN Chromobox protein homolog 5 (Fragment) OS=Homo sapiens GN=CBX5 PE=1 SV=1	2	3	3	3	2	2	1	1	1	1	1	1	2	2	2	2	2	2	1	1	1	1	1	1	2	2	2	2	2	2	1	1	1	1	1	1	2	2	2	2	20.4	20.4
P46060;B0QYT5;B0QYT4;H0Y4Q3;B0QYT6	P46060	10;3;3;3;1	10;3;3;3;1	10;3;3;3;1	Ran GTPase-activating protein 1	RANGAP1	sp|P46060|RAGP1_HUMAN Ran GTPase-activating protein 1 OS=Homo sapiens GN=RANGAP1 PE=1 SV=1	5	10	10	10	7	6	7	7	7	6	6	8	5	7	8	6	7	6	7	7	7	6	6	8	5	7	8	6	7	6	7	7	7	6	6	8	5	7	8	6	20.1	20.1
P46777;Q5T7N0	P46777	8;1	8;1	8;1	60S ribosomal protein L5	RPL5	sp|P46777|RL5_HUMAN 60S ribosomal protein L5 OS=Homo sapiens GN=RPL5 PE=1 SV=3	2	8	8	8	6	7	8	6	8	7	8	7	8	7	8	6	6	7	8	6	8	7	8	7	8	7	8	6	6	7	8	6	8	7	8	7	8	7	8	6	25.3	25.3
P46778;G3V1B3;M0R181	P46778;G3V1B3;M0R181	3;2;2	3;2;2	3;2;2	60S ribosomal protein L21	RPL21	sp|P46778|RL21_HUMAN 60S ribosomal protein L21 OS=Homo sapiens GN=RPL21 PE=1 SV=2;tr|G3V1B3|G3V1B3_HUMAN 60S ribosomal protein L21 OS=Homo sapiens GN=RPL21 PE=1 SV=1;tr|M0R181|M0R181_HUMAN 60S ribosomal protein L21 (Fragment) OS=Homo sapiens GN=RPL21 PE=1	3	3	3	3	2	2	3	3	3	3	3	3	3	3	3	3	2	2	3	3	3	3	3	3	3	3	3	3	2	2	3	3	3	3	3	3	3	3	3	3	20.6	20.6
P46783;F6U211;S4R435;Q9NQ39	P46783;F6U211;S4R435	3;2;2;1	3;2;2;1	3;2;2;1	40S ribosomal protein S10	RPS10;RPS10-NUDT3	sp|P46783|RS10_HUMAN 40S ribosomal protein S10 OS=Homo sapiens GN=RPS10 PE=1 SV=1;tr|F6U211|F6U211_HUMAN 40S ribosomal protein S10 OS=Homo sapiens GN=RPS10 PE=4 SV=1;tr|S4R435|S4R435_HUMAN Protein RPS10-NUDT3 (Fragment) OS=Homo sapiens GN=RPS10-NUDT3 PE=4	4	3	3	3	3	2	2	2	2	2	2	1	2	1	1	1	3	2	2	2	2	2	2	1	2	1	1	1	3	2	2	2	2	2	2	1	2	1	1	1	23	23
P47813;X6RAC9;O14602;A6NJH9	P47813;X6RAC9;O14602;A6NJH9	5;4;4;3	5;4;4;3	5;4;4;3	Eukaryotic translation initiation factor 1A, X-chromosomal;Eukaryotic translation initiation factor 1A, Y-chromosomal	EIF1AX;EIF1AY	sp|P47813|IF1AX_HUMAN Eukaryotic translation initiation factor 1A, X-chromosomal OS=Homo sapiens GN=EIF1AX PE=1 SV=2;tr|X6RAC9|X6RAC9_HUMAN Eukaryotic translation initiation factor 1A, X-chromosomal OS=Homo sapiens GN=EIF1AX PE=1 SV=1;sp|O14602|IF1AY_HUMAN	4	5	5	5	4	3	4	5	4	3	3	4	4	2	3	4	4	3	4	5	4	3	3	4	4	2	3	4	4	3	4	5	4	3	3	4	4	2	3	4	36.1	36.1
P47914	P47914	2	2	2	60S ribosomal protein L29	RPL29	sp|P47914|RL29_HUMAN 60S ribosomal protein L29 OS=Homo sapiens GN=RPL29 PE=1 SV=2	1	2	2	2	2	2	2	2	2	2	2	2	2	2	2	2	2	2	2	2	2	2	2	2	2	2	2	2	2	2	2	2	2	2	2	2	2	2	2	2	14.5	14.5
P48059;A0A0J9YXC7;A0A0M3HER1;A0A087X2F9;Q7Z4I7;C9JF46;F8WB59;A0A0J9YYC1;F8WE10;F8WC86;H0Y592	P48059;A0A0J9YXC7;A0A0M3HER1	12;9;7;4;4;3;2;1;1;1;1	12;9;7;4;4;3;2;1;1;1;1	12;9;7;4;4;3;2;1;1;1;1	LIM and senescent cell antigen-like-containing domain protein 1	LIMS1	sp|P48059|LIMS1_HUMAN LIM and senescent cell antigen-like-containing domain protein 1 OS=Homo sapiens GN=LIMS1 PE=1 SV=4;tr|A0A0J9YXC7|A0A0J9YXC7_HUMAN LIM and senescent cell antigen-like-containing domain protein 3 OS=Homo sapiens GN=LIMS4 PE=1 SV=1;tr|A0	11	12	12	12	9	6	9	10	10	9	8	9	11	10	8	11	9	6	9	10	10	9	8	9	11	10	8	11	9	6	9	10	10	9	8	9	11	10	8	11	44	44
P48643;E7ENZ3;B7ZAR1;E9PCA1;D6RIZ7;H0Y914	P48643;E7ENZ3;B7ZAR1;E9PCA1	9;8;8;8;1;1	9;8;8;8;1;1	9;8;8;8;1;1	T-complex protein 1 subunit epsilon	CCT5	sp|P48643|TCPE_HUMAN T-complex protein 1 subunit epsilon OS=Homo sapiens GN=CCT5 PE=1 SV=1;tr|E7ENZ3|E7ENZ3_HUMAN T-complex protein 1 subunit epsilon OS=Homo sapiens GN=CCT5 PE=1 SV=1;tr|B7ZAR1|B7ZAR1_HUMAN T-complex protein 1 subunit epsilon OS=Homo sapie	6	9	9	9	7	6	7	6	6	4	7	6	7	5	7	6	7	6	7	6	6	4	7	6	7	5	7	6	7	6	7	6	6	4	7	6	7	5	7	6	21.6	21.6
P49006	P49006	2	2	2	MARCKS-related protein	MARCKSL1	sp|P49006|MRP_HUMAN MARCKS-related protein OS=Homo sapiens GN=MARCKSL1 PE=1 SV=2	1	2	2	2	2	2	2	2	2	2	2	2	2	2	2	1	2	2	2	2	2	2	2	2	2	2	2	1	2	2	2	2	2	2	2	2	2	2	2	1	14.4	14.4
P49207	P49207	5	5	5	60S ribosomal protein L34	RPL34	sp|P49207|RL34_HUMAN 60S ribosomal protein L34 OS=Homo sapiens GN=RPL34 PE=1 SV=3	1	5	5	5	5	4	5	3	3	3	3	3	3	4	2	3	5	4	5	3	3	3	3	3	3	4	2	3	5	4	5	3	3	3	3	3	3	4	2	3	35.9	35.9
P49368;B4DUR8;E9PRC8;Q5SZX6;Q5SZX9;E9PQ35;E9PM09;Q5SZW8	P49368;B4DUR8	26;24;7;6;5;3;3;2	26;24;7;6;5;3;3;2	26;24;7;6;5;3;3;2	T-complex protein 1 subunit gamma	CCT3	sp|P49368|TCPG_HUMAN T-complex protein 1 subunit gamma OS=Homo sapiens GN=CCT3 PE=1 SV=4;tr|B4DUR8|B4DUR8_HUMAN T-complex protein 1 subunit gamma OS=Homo sapiens GN=CCT3 PE=1 SV=1	8	26	26	26	25	24	23	24	22	25	23	22	22	23	22	21	25	24	23	24	22	25	23	22	22	23	22	21	25	24	23	24	22	25	23	22	22	23	22	21	53.8	53.8
P49458;E9PE20	P49458;E9PE20	2;1	2;1	2;1	Signal recognition particle 9 kDa protein	SRP9	sp|P49458|SRP09_HUMAN Signal recognition particle 9 kDa protein OS=Homo sapiens GN=SRP9 PE=1 SV=2;tr|E9PE20|E9PE20_HUMAN Signal recognition particle 9 kDa protein OS=Homo sapiens GN=SRP9 PE=1 SV=1	2	2	2	2	1	1	1	2	2	2	2	2	2	2	2	2	1	1	1	2	2	2	2	2	2	2	2	2	1	1	1	2	2	2	2	2	2	2	2	2	25.6	25.6
P49588;H3BPK7	P49588;H3BPK7	2;1	2;1	2;1	Alanine--tRNA ligase, cytoplasmic	AARS	sp|P49588|SYAC_HUMAN Alanine--tRNA ligase, cytoplasmic OS=Homo sapiens GN=AARS PE=1 SV=2;tr|H3BPK7|H3BPK7_HUMAN Alanine--tRNA ligase, cytoplasmic (Fragment) OS=Homo sapiens GN=AARS PE=1 SV=3	2	2	2	2	2	0	1	0	1	1	2	0	1	1	0	0	2	0	1	0	1	1	2	0	1	1	0	0	2	0	1	0	1	1	2	0	1	1	0	0	2.8	2.8
Q5T5C7;P49591	Q5T5C7;P49591	4;4	4;4	4;4	Serine--tRNA ligase, cytoplasmic	SARS	tr|Q5T5C7|Q5T5C7_HUMAN Serine--tRNA ligase, cytoplasmic OS=Homo sapiens GN=SARS PE=1 SV=1;sp|P49591|SYSC_HUMAN Serine--tRNA ligase, cytoplasmic OS=Homo sapiens GN=SARS PE=1 SV=3	2	4	4	4	4	2	4	3	3	1	2	3	3	3	3	3	4	2	4	3	3	1	2	3	3	3	3	3	4	2	4	3	3	1	2	3	3	3	3	3	8.6	8.6
P49675	P49675	1	1	1	Steroidogenic acute regulatory protein, mitochondrial	STAR	sp|P49675|STAR_HUMAN Steroidogenic acute regulatory protein, mitochondrial OS=Homo sapiens GN=STAR PE=1 SV=2	1	1	1	1	1	1	1	0	0	1	0	0	0	0	1	0	1	1	1	0	0	1	0	0	0	0	1	0	1	1	1	0	0	1	0	0	0	0	1	0	3.9	3.9
P49756;E9PQU5;H0YE46;E9PSE8	P49756	31;12;4;4	31;12;4;4	31;12;4;4	RNA-binding protein 25	RBM25	sp|P49756|RBM25_HUMAN RNA-binding protein 25 OS=Homo sapiens GN=RBM25 PE=1 SV=3	4	31	31	31	28	27	28	28	30	29	29	27	27	27	28	31	28	27	28	28	30	29	29	27	27	27	28	31	28	27	28	28	30	29	29	27	27	27	28	31	33.9	33.9
P50395;Q5SX91;Q5SX87	P50395;Q5SX91;Q5SX87	2;1;1	2;1;1	2;1;1	Rab GDP dissociation inhibitor beta	GDI2	sp|P50395|GDIB_HUMAN Rab GDP dissociation inhibitor beta OS=Homo sapiens GN=GDI2 PE=1 SV=2;tr|Q5SX91|Q5SX91_HUMAN Rab GDP dissociation inhibitor beta (Fragment) OS=Homo sapiens GN=GDI2 PE=1 SV=1;tr|Q5SX87|Q5SX87_HUMAN Rab GDP dissociation inhibitor beta (F	3	2	2	2	2	1	2	2	1	2	2	2	1	2	2	2	2	1	2	2	1	2	2	2	1	2	2	2	2	1	2	2	1	2	2	2	1	2	2	2	7	7
P50402;Q5HY57	P50402;Q5HY57	5;4	5;4	5;4	Emerin	EMD	sp|P50402|EMD_HUMAN Emerin OS=Homo sapiens GN=EMD PE=1 SV=1;tr|Q5HY57|Q5HY57_HUMAN Emerin OS=Homo sapiens GN=EMD PE=1 SV=1	2	5	5	5	4	2	3	3	2	5	2	5	3	3	4	4	4	2	3	3	2	5	2	5	3	3	4	4	4	2	3	3	2	5	2	5	3	3	4	4	24	24
P50502;Q3KNR6;H7C3I1;A0A087X1H6;Q8NFI4;F6VDH7;Q8IZP2;F8WAQ7	P50502;Q3KNR6;H7C3I1;A0A087X1H6;Q8NFI4;F6VDH7;Q8IZP2	9;7;6;6;6;5;5;1	9;7;6;6;6;5;5;1	9;7;6;6;6;5;5;1	Hsc70-interacting protein;Putative protein FAM10A5;Putative protein FAM10A4	ST13;ST13P5;ST13P4	sp|P50502|F10A1_HUMAN Hsc70-interacting protein OS=Homo sapiens GN=ST13 PE=1 SV=2;tr|Q3KNR6|Q3KNR6_HUMAN Hsc70-interacting protein OS=Homo sapiens GN=ST13 PE=1 SV=1;tr|H7C3I1|H7C3I1_HUMAN Hsc70-interacting protein (Fragment) OS=Homo sapiens GN=ST13 PE=1 SV	8	9	9	9	9	9	8	9	9	7	8	8	8	9	9	9	9	9	8	9	9	7	8	8	8	9	9	9	9	9	8	9	9	7	8	8	8	9	9	9	34.4	34.4
P50990;H7C4C8;H7C2U0	P50990	21;10;3	21;10;3	21;10;3	T-complex protein 1 subunit theta	CCT8	sp|P50990|TCPQ_HUMAN T-complex protein 1 subunit theta OS=Homo sapiens GN=CCT8 PE=1 SV=4	3	21	21	21	20	16	18	16	20	18	19	14	16	18	19	15	20	16	18	16	20	18	19	14	16	18	19	15	20	16	18	16	20	18	19	14	16	18	19	15	42.2	42.2
P50995;H0Y6E1	P50995	9;3	9;3	9;3	Annexin A11	ANXA11	sp|P50995|ANX11_HUMAN Annexin A11 OS=Homo sapiens GN=ANXA11 PE=1 SV=1	2	9	9	9	6	4	6	3	5	6	0	5	3	7	8	9	6	4	6	3	5	6	0	5	3	7	8	9	6	4	6	3	5	6	0	5	3	7	8	9	22.4	22.4
P51149;C9J4V0;C9J8S3;C9J4S4;C9IZZ0;C9J592;C9J7D1	P51149;C9J4V0;C9J8S3;C9J4S4;C9IZZ0;C9J592	5;4;4;3;3;3;2	5;4;4;3;3;3;2	5;4;4;3;3;3;2	Ras-related protein Rab-7a	RAB7A	sp|P51149|RAB7A_HUMAN Ras-related protein Rab-7a OS=Homo sapiens GN=RAB7A PE=1 SV=1;tr|C9J4V0|C9J4V0_HUMAN Ras-related protein Rab-7a OS=Homo sapiens GN=RAB7A PE=1 SV=1;tr|C9J8S3|C9J8S3_HUMAN Ras-related protein Rab-7a OS=Homo sapiens GN=RAB7A PE=1 SV=1;tr	7	5	5	5	4	4	4	2	4	3	5	3	5	4	4	4	4	4	4	2	4	3	5	3	5	4	4	4	4	4	4	2	4	3	5	3	5	4	4	4	27.1	27.1
P51572;C9JMD7;C9JSP1;C9JQ75;C9J0M4	P51572	3;1;1;1;1	3;1;1;1;1	3;1;1;1;1	B-cell receptor-associated protein 31	BCAP31	sp|P51572|BAP31_HUMAN B-cell receptor-associated protein 31 OS=Homo sapiens GN=BCAP31 PE=1 SV=3	5	3	3	3	3	3	3	3	3	3	3	3	3	3	2	2	3	3	3	3	3	3	3	3	3	3	2	2	3	3	3	3	3	3	3	3	3	3	2	2	11.8	11.8
P51589	P51589	1	1	1	Cytochrome P450 2J2	CYP2J2	sp|P51589|CP2J2_HUMAN Cytochrome P450 2J2 OS=Homo sapiens GN=CYP2J2 PE=1 SV=2	1	1	1	1	0	1	0	0	0	0	0	0	0	0	0	0	0	1	0	0	0	0	0	0	0	0	0	0	0	1	0	0	0	0	0	0	0	0	0	0	2.4	2.4
P51991	P51991	3	3	3	Heterogeneous nuclear ribonucleoprotein A3	HNRNPA3	sp|P51991|ROA3_HUMAN Heterogeneous nuclear ribonucleoprotein A3 OS=Homo sapiens GN=HNRNPA3 PE=1 SV=2	1	3	3	3	2	2	1	1	2	1	2	2	1	2	3	0	2	2	1	1	2	1	2	2	1	2	3	0	2	2	1	1	2	1	2	2	1	2	3	0	8.5	8.5
P52209;K7EM49;K7EPF6;K7EMN2	P52209;K7EM49;K7EPF6;K7EMN2	6;5;5;4	6;5;5;4	6;5;5;4	6-phosphogluconate dehydrogenase, decarboxylating	PGD	sp|P52209|6PGD_HUMAN 6-phosphogluconate dehydrogenase, decarboxylating OS=Homo sapiens GN=PGD PE=1 SV=3;tr|K7EM49|K7EM49_HUMAN 6-phosphogluconate dehydrogenase, decarboxylating (Fragment) OS=Homo sapiens GN=PGD PE=1 SV=1;tr|K7EPF6|K7EPF6_HUMAN 6-phosphoglu	4	6	6	6	6	6	6	6	4	4	5	4	5	4	3	4	6	6	6	6	4	4	5	4	5	4	3	4	6	6	6	6	4	4	5	4	5	4	3	4	16.4	16.4
P52292;J3QLL0;J3KS65;J3QL07	P52292	15;7;7;1	15;7;7;1	15;7;7;1	Importin subunit alpha-1	KPNA2	sp|P52292|IMA1_HUMAN Importin subunit alpha-1 OS=Homo sapiens GN=KPNA2 PE=1 SV=1	4	15	15	15	13	14	11	13	14	15	14	14	15	13	14	13	13	14	11	13	14	15	14	14	15	13	14	13	13	14	11	13	14	15	14	14	15	13	14	13	38.8	38.8
P52597	P52597	1	1	1	Heterogeneous nuclear ribonucleoprotein F;Heterogeneous nuclear ribonucleoprotein F, N-terminally processed	HNRNPF	sp|P52597|HNRPF_HUMAN Heterogeneous nuclear ribonucleoprotein F OS=Homo sapiens GN=HNRNPF PE=1 SV=3	1	1	1	1	1	1	1	1	1	1	1	1	1	1	1	1	1	1	1	1	1	1	1	1	1	1	1	1	1	1	1	1	1	1	1	1	1	1	1	1	3.9	3.9
P52701;A0A087WWJ1;A0A087WYT6	P52701;A0A087WWJ1	7;6;1	7;6;1	7;6;1	DNA mismatch repair protein Msh6	MSH6	sp|P52701|MSH6_HUMAN DNA mismatch repair protein Msh6 OS=Homo sapiens GN=MSH6 PE=1 SV=2;tr|A0A087WWJ1|A0A087WWJ1_HUMAN DNA mismatch repair protein Msh6 OS=Homo sapiens GN=MSH6 PE=1 SV=1	3	7	7	7	6	2	4	2	2	3	4	2	3	3	3	4	6	2	4	2	2	3	4	2	3	3	3	4	6	2	4	2	2	3	4	2	3	3	3	4	6.6	6.6
P52907	P52907	1	1	1	F-actin-capping protein subunit alpha-1	CAPZA1	sp|P52907|CAZA1_HUMAN F-actin-capping protein subunit alpha-1 OS=Homo sapiens GN=CAPZA1 PE=1 SV=3	1	1	1	1	0	0	0	0	1	0	1	0	1	0	1	0	0	0	0	0	1	0	1	0	1	0	1	0	0	0	0	0	1	0	1	0	1	0	1	0	6.3	6.3
P53396;K7ESG8	P53396	7;2	7;2	7;2	ATP-citrate synthase	ACLY	sp|P53396|ACLY_HUMAN ATP-citrate synthase OS=Homo sapiens GN=ACLY PE=1 SV=3	2	7	7	7	5	7	7	7	6	6	6	5	6	5	5	6	5	7	7	7	6	6	6	5	6	5	5	6	5	7	7	7	6	6	6	5	6	5	5	6	9.6	9.6
P53582;H0Y955;H0Y9L0;D6RF24;H0Y903	P53582	7;3;1;1;1	7;3;1;1;1	7;3;1;1;1	Methionine aminopeptidase 1	METAP1	sp|P53582|MAP11_HUMAN Methionine aminopeptidase 1 OS=Homo sapiens GN=METAP1 PE=1 SV=2	5	7	7	7	4	3	4	6	6	5	4	5	3	3	6	5	4	3	4	6	6	5	4	5	3	3	6	5	4	3	4	6	6	5	4	5	3	3	6	5	30.1	30.1
P53621	P53621	3	3	3	Coatomer subunit alpha;Xenin;Proxenin	COPA	sp|P53621|COPA_HUMAN Coatomer subunit alpha OS=Homo sapiens GN=COPA PE=1 SV=2	1	3	3	3	2	1	2	2	2	1	2	2	2	2	2	3	2	1	2	2	2	1	2	2	2	2	2	3	2	1	2	2	2	1	2	2	2	2	2	3	3	3
P53999	P53999	4	4	4	Activated RNA polymerase II transcriptional coactivator p15	SUB1	sp|P53999|TCP4_HUMAN Activated RNA polymerase II transcriptional coactivator p15 OS=Homo sapiens GN=SUB1 PE=1 SV=3	1	4	4	4	3	3	3	3	3	3	4	3	3	3	3	3	3	3	3	3	3	3	4	3	3	3	3	3	3	3	3	3	3	3	4	3	3	3	3	3	37	37
P54136;E5RH09;E5RJM9	P54136	6;1;1	6;1;1	6;1;1	Arginine--tRNA ligase, cytoplasmic	RARS	sp|P54136|SYRC_HUMAN Arginine--tRNA ligase, cytoplasmic OS=Homo sapiens GN=RARS PE=1 SV=2	3	6	6	6	3	2	1	1	0	0	4	2	2	3	4	5	3	2	1	1	0	0	4	2	2	3	4	5	3	2	1	1	0	0	4	2	2	3	4	5	10.3	10.3
P54577;A0A0C4DGZ5	P54577;A0A0C4DGZ5	11;8	11;8	11;8	Tyrosine--tRNA ligase, cytoplasmic;Tyrosine--tRNA ligase, cytoplasmic, N-terminally processed;Tyrosine--tRNA ligase	YARS	sp|P54577|SYYC_HUMAN Tyrosine--tRNA ligase, cytoplasmic OS=Homo sapiens GN=YARS PE=1 SV=4;tr|A0A0C4DGZ5|A0A0C4DGZ5_HUMAN Tyrosine--tRNA ligase OS=Homo sapiens GN=YARS PE=1 SV=1	2	11	11	11	8	4	7	6	7	7	6	7	5	5	6	4	8	4	7	6	7	7	6	7	5	5	6	4	8	4	7	6	7	7	6	7	5	5	6	4	21.8	21.8
P55010;H0YLZ1;H0YN40;H0YMJ8;H0YM54	P55010;H0YLZ1;H0YN40	4;2;2;1;1	4;2;2;1;1	4;2;2;1;1	Eukaryotic translation initiation factor 5	EIF5	sp|P55010|IF5_HUMAN Eukaryotic translation initiation factor 5 OS=Homo sapiens GN=EIF5 PE=1 SV=2;tr|H0YLZ1|H0YLZ1_HUMAN Eukaryotic translation initiation factor 5 (Fragment) OS=Homo sapiens GN=EIF5 PE=1 SV=1;tr|H0YN40|H0YN40_HUMAN Eukaryotic translation in	5	4	4	4	4	4	4	3	4	3	4	3	3	4	3	4	4	4	4	3	4	3	4	3	3	4	3	4	4	4	4	3	4	3	4	3	3	4	3	4	11.1	11.1
P55081	P55081	2	2	2	Microfibrillar-associated protein 1	MFAP1	sp|P55081|MFAP1_HUMAN Microfibrillar-associated protein 1 OS=Homo sapiens GN=MFAP1 PE=1 SV=2	1	2	2	2	2	2	2	2	2	2	2	2	2	2	2	2	2	2	2	2	2	2	2	2	2	2	2	2	2	2	2	2	2	2	2	2	2	2	2	2	8.7	8.7
P55201;Q9ULD4	P55201	6;2	6;2	6;2	Peregrin	BRPF1	sp|P55201|BRPF1_HUMAN Peregrin OS=Homo sapiens GN=BRPF1 PE=1 SV=2	2	6	6	6	3	4	5	4	4	3	3	3	1	4	6	5	3	4	5	4	4	3	3	3	1	4	6	5	3	4	5	4	4	3	3	3	1	4	6	5	5.2	5.2
P56192;H0YI94;H0YIP0;H0YIC2;H0YHL6;H0YI27;F5H2V6;H0YHV5	P56192;H0YI94;H0YIP0	4;2;2;1;1;1;1;1	4;2;2;1;1;1;1;1	4;2;2;1;1;1;1;1	Methionine--tRNA ligase, cytoplasmic	MARS	sp|P56192|SYMC_HUMAN Methionine--tRNA ligase, cytoplasmic OS=Homo sapiens GN=MARS PE=1 SV=2;tr|H0YI94|H0YI94_HUMAN Methionine--tRNA ligase, cytoplasmic (Fragment) OS=Homo sapiens GN=MARS PE=1 SV=1;tr|H0YIP0|H0YIP0_HUMAN Methionine--tRNA ligase, cytoplasmic	8	4	4	4	2	2	1	1	3	2	3	4	3	3	3	3	2	2	1	1	3	2	3	4	3	3	3	3	2	2	1	1	3	2	3	4	3	3	3	3	4.9	4.9
P56537;A0A0U1RQV5	P56537;A0A0U1RQV5	2;1	2;1	2;1	Eukaryotic translation initiation factor 6	EIF6	sp|P56537|IF6_HUMAN Eukaryotic translation initiation factor 6 OS=Homo sapiens GN=EIF6 PE=1 SV=1;tr|A0A0U1RQV5|A0A0U1RQV5_HUMAN Uncharacterized protein (Fragment) OS=Homo sapiens PE=1 SV=1	2	2	2	2	2	1	1	2	2	2	1	1	2	2	1	2	2	1	1	2	2	2	1	1	2	2	1	2	2	1	1	2	2	2	1	1	2	2	1	2	10.2	10.2
P57076;C9JX57;D3DSE6;C9J818;F8VZ95;H7BZW1;H7C2R6;Q9NX33	P57076;C9JX57;D3DSE6;C9J818;F8VZ95;H7BZW1;H7C2R6	4;3;3;3;3;3;2;1	4;3;3;3;3;3;2;1	4;3;3;3;3;3;2;1	UPF0769 protein C21orf59	C21orf59	sp|P57076|CU059_HUMAN UPF0769 protein C21orf59 OS=Homo sapiens GN=C21orf59 PE=1 SV=1;tr|C9JX57|C9JX57_HUMAN UPF0769 protein C21orf59 (Fragment) OS=Homo sapiens GN=C21orf59 PE=4 SV=7;tr|D3DSE6|D3DSE6_HUMAN Chromosome 21 open reading frame 59, isoform CRA_b	8	4	4	4	1	2	2	1	3	2	2	2	2	2	3	2	1	2	2	1	3	2	2	2	2	2	3	2	1	2	2	1	3	2	2	2	2	2	3	2	18.6	18.6
P60174;U3KPZ0;U3KQF3;U3KPS5	P60174;U3KPZ0	20;10;9;3	20;10;9;3	20;10;9;3	Triosephosphate isomerase	TPI1	sp|P60174|TPIS_HUMAN Triosephosphate isomerase OS=Homo sapiens GN=TPI1 PE=1 SV=3;tr|U3KPZ0|U3KPZ0_HUMAN Triosephosphate isomerase (Fragment) OS=Homo sapiens GN=TPI1 PE=1 SV=1	4	20	20	20	20	19	19	19	19	18	19	19	19	19	18	19	20	19	19	19	19	18	19	19	19	19	18	19	20	19	19	19	19	18	19	19	19	19	18	19	78	78
P60228;E5RGA2;H0YBR5;E5RIT4;E5RHS5;H0YAW4	P60228;E5RGA2;H0YBR5	6;4;3;2;2;1	6;4;3;2;2;1	6;4;3;2;2;1	Eukaryotic translation initiation factor 3 subunit E	EIF3E	sp|P60228|EIF3E_HUMAN Eukaryotic translation initiation factor 3 subunit E OS=Homo sapiens GN=EIF3E PE=1 SV=1;tr|E5RGA2|E5RGA2_HUMAN Eukaryotic translation initiation factor 3 subunit E OS=Homo sapiens GN=EIF3E PE=1 SV=1;tr|H0YBR5|H0YBR5_HUMAN Eukaryotic t	6	6	6	6	3	1	5	2	4	3	2	4	2	5	4	3	3	1	5	2	4	3	2	4	2	5	4	3	3	1	5	2	4	3	2	4	2	5	4	3	15.3	15.3
P60709;G5E9R0;E7EVS6;C9JZR7;Q6S8J3;C9JTX5;C9JUM1;A5A3E0;P0CG38;Q9BYX7;P0CG39;F8WCH0	P60709	16;7;7;6;6;5;5;5;4;3;3;2	1;1;1;1;0;1;0;0;0;0;0;0	1;1;1;1;0;1;0;0;0;0;0;0	Actin, cytoplasmic 1;Actin, cytoplasmic 1, N-terminally processed	ACTB	sp|P60709|ACTB_HUMAN Actin, cytoplasmic 1 OS=Homo sapiens GN=ACTB PE=1 SV=1	12	16	1	1	15	15	16	15	16	15	16	16	16	16	15	14	1	1	1	1	1	1	1	1	1	1	1	1	1	1	1	1	1	1	1	1	1	1	1	1	59.7	4.5
P60842;J3KT12;J3QS69;J3KTB5;J3KSZ0;J3QL43;E7EQG2;Q14240;J3QR64;J3KTN0;J3QLN6;J3KS25;J3QKZ9;J3QL52;J3KT04;J3KS93;E7EMV8;J3KSN7	P60842;J3KT12;J3QS69;J3KTB5;J3KSZ0;J3QL43;E7EQG2;Q14240	21;17;15;13;12;12;11;11;9;8;8;8;7;4;4;4;4;4	21;17;15;13;12;12;11;11;9;8;8;8;7;4;4;4;4;4	16;12;10;10;10;7;6;6;6;6;5;5;4;2;1;1;1;1	Eukaryotic initiation factor 4A-I;Eukaryotic initiation factor 4A-II;Eukaryotic initiation factor 4A-II, N-terminally processed	EIF4A1;EIF4A2	sp|P60842|IF4A1_HUMAN Eukaryotic initiation factor 4A-I OS=Homo sapiens GN=EIF4A1 PE=1 SV=1;tr|J3KT12|J3KT12_HUMAN Eukaryotic initiation factor 4A-I OS=Homo sapiens GN=EIF4A1 PE=1 SV=1;tr|J3QS69|J3QS69_HUMAN Eukaryotic initiation factor 4A-I (Fragment) OS=	18	21	21	16	18	14	15	18	12	18	20	14	18	15	16	17	18	14	15	18	12	18	20	14	18	15	16	17	14	13	14	14	10	14	15	13	16	12	12	13	47.5	47.5
P60866;E5RIP1;E5RJX2;G3XAN0	P60866;E5RIP1;E5RJX2;G3XAN0	2;1;1;1	2;1;1;1	2;1;1;1	40S ribosomal protein S20	RPS20	sp|P60866|RS20_HUMAN 40S ribosomal protein S20 OS=Homo sapiens GN=RPS20 PE=1 SV=1;tr|E5RIP1|E5RIP1_HUMAN 40S ribosomal protein S20 OS=Homo sapiens GN=RPS20 PE=1 SV=1;tr|E5RJX2|E5RJX2_HUMAN 40S ribosomal protein S20 OS=Homo sapiens GN=RPS20 PE=1 SV=1;tr|G3X	4	2	2	2	2	1	1	2	1	2	2	2	2	2	2	2	2	1	1	2	1	2	2	2	2	2	2	2	2	1	1	2	1	2	2	2	2	2	2	2	19.3	19.3
P60981;F6RFD5	P60981;F6RFD5	5;4	4;3	4;3	Destrin	DSTN	sp|P60981|DEST_HUMAN Destrin OS=Homo sapiens GN=DSTN PE=1 SV=3;tr|F6RFD5|F6RFD5_HUMAN Destrin OS=Homo sapiens GN=DSTN PE=1 SV=1	2	5	4	4	4	4	4	4	3	5	4	4	4	5	4	5	3	3	3	4	3	4	3	4	4	4	3	4	3	3	3	4	3	4	3	4	4	4	3	4	31.5	27.3
P61081;M0QX69;M0QYI6	P61081	6;2;1	6;2;1	6;2;1	NEDD8-conjugating enzyme Ubc12	UBE2M	sp|P61081|UBC12_HUMAN NEDD8-conjugating enzyme Ubc12 OS=Homo sapiens GN=UBE2M PE=1 SV=1	3	6	6	6	4	4	5	4	5	4	5	6	4	5	4	4	4	4	5	4	5	4	5	6	4	5	4	4	4	4	5	4	5	4	5	6	4	5	4	4	35.5	35.5
P84077;P61204;C9J1Z8;F5H423;P84085;F5H1V1;F5H6T5;F8WDB3;H0YGG7;F5H0C7	P84077;P61204;C9J1Z8;F5H423;P84085	3;3;2;2;2;1;1;1;1;1	2;2;1;1;1;0;0;0;1;0	2;2;1;1;1;0;0;0;1;0	ADP-ribosylation factor 1;ADP-ribosylation factor 3;ADP-ribosylation factor 5	ARF1;ARF3;ARF5	sp|P84077|ARF1_HUMAN ADP-ribosylation factor 1 OS=Homo sapiens GN=ARF1 PE=1 SV=2;sp|P61204|ARF3_HUMAN ADP-ribosylation factor 3 OS=Homo sapiens GN=ARF3 PE=1 SV=2;tr|C9J1Z8|C9J1Z8_HUMAN ADP-ribosylation factor 5 (Fragment) OS=Homo sapiens GN=ARF5 PE=1 SV=1;	10	3	2	2	3	3	3	2	3	3	3	3	3	3	3	3	2	2	2	1	2	2	2	2	2	2	2	2	2	2	2	1	2	2	2	2	2	2	2	2	19.9	13.8
P61247;D6RG13;D6RAT0;H0Y9Y4;D6R9B6;D6RB09;E9PFI5;H0Y8L7;D6RAS7;D6RED7;D6RI02;D6RGE0	P61247;D6RG13;D6RAT0;H0Y9Y4;D6R9B6;D6RB09;E9PFI5;H0Y8L7	11;10;10;9;8;8;8;7;5;3;2;1	11;10;10;9;8;8;8;7;5;3;2;1	11;10;10;9;8;8;8;7;5;3;2;1	40S ribosomal protein S3a	RPS3A	sp|P61247|RS3A_HUMAN 40S ribosomal protein S3a OS=Homo sapiens GN=RPS3A PE=1 SV=2;tr|D6RG13|D6RG13_HUMAN 40S ribosomal protein S3a (Fragment) OS=Homo sapiens GN=RPS3A PE=1 SV=1;tr|D6RAT0|D6RAT0_HUMAN 40S ribosomal protein S3a OS=Homo sapiens GN=RPS3A PE=1	12	11	11	11	9	8	10	5	9	7	11	10	10	7	9	8	9	8	10	5	9	7	11	10	10	7	9	8	9	8	10	5	9	7	11	10	10	7	9	8	44.7	44.7
P61313;E7EQV9;E7ENU7;E7EX53;E7ERA2	P61313;E7EQV9;E7ENU7;E7EX53	13;11;10;7;2	13;11;10;7;2	13;11;10;7;2	60S ribosomal protein L15;Ribosomal protein L15	RPL15	sp|P61313|RL15_HUMAN 60S ribosomal protein L15 OS=Homo sapiens GN=RPL15 PE=1 SV=2;tr|E7EQV9|E7EQV9_HUMAN Ribosomal protein L15 (Fragment) OS=Homo sapiens GN=RPL15 PE=1 SV=1;tr|E7ENU7|E7ENU7_HUMAN Ribosomal protein L15 (Fragment) OS=Homo sapiens GN=RPL15 PE	5	13	13	13	10	12	12	9	10	12	13	11	11	12	10	10	10	12	12	9	10	12	13	11	11	12	10	10	10	12	12	9	10	12	13	11	11	12	10	10	50	50
P61353;K7ELC7;K7EQQ9;K7ERY7	P61353;K7ELC7;K7EQQ9	4;3;2;1	4;3;2;1	4;3;2;1	60S ribosomal protein L27	RPL27	sp|P61353|RL27_HUMAN 60S ribosomal protein L27 OS=Homo sapiens GN=RPL27 PE=1 SV=2;tr|K7ELC7|K7ELC7_HUMAN 60S ribosomal protein L27 (Fragment) OS=Homo sapiens GN=RPL27 PE=1 SV=1;tr|K7EQQ9|K7EQQ9_HUMAN 60S ribosomal protein L27 OS=Homo sapiens GN=RPL27 PE=1	4	4	4	4	4	4	4	4	4	4	4	4	4	4	4	4	4	4	4	4	4	4	4	4	4	4	4	4	4	4	4	4	4	4	4	4	4	4	4	4	36	36
P61586;Q5JR08;P08134;Q5JR07;C9JNR4;E9PQH6;C9JX21;Q5JR05;Q5JR06;E9PN11;U3KQA9;U3KQV3;P62745	P61586;Q5JR08;P08134;Q5JR07;C9JNR4;E9PQH6;C9JX21;Q5JR05	4;3;3;2;2;2;2;2;1;1;1;1;1	4;3;3;2;2;2;2;2;1;1;1;1;1	4;3;3;2;2;2;2;2;1;1;1;1;1	Transforming protein RhoA;Rho-related GTP-binding protein RhoC	RHOA;RHOC	sp|P61586|RHOA_HUMAN Transforming protein RhoA OS=Homo sapiens GN=RHOA PE=1 SV=1;tr|Q5JR08|Q5JR08_HUMAN Rho-related GTP-binding protein RhoC (Fragment) OS=Homo sapiens GN=RHOC PE=1 SV=7;sp|P08134|RHOC_HUMAN Rho-related GTP-binding protein RhoC OS=Homo sapi	13	4	4	4	3	3	2	2	3	3	2	3	2	2	3	2	3	3	2	2	3	3	2	3	2	2	3	2	3	3	2	2	3	3	2	3	2	2	3	2	26.4	26.4
P61604;B8ZZL8;B8ZZ54;S4R3N1	P61604;B8ZZL8;B8ZZ54	5;4;3;2	5;4;3;2	5;4;3;2	10 kDa heat shock protein, mitochondrial	HSPE1	sp|P61604|CH10_HUMAN 10 kDa heat shock protein, mitochondrial OS=Homo sapiens GN=HSPE1 PE=1 SV=2;tr|B8ZZL8|B8ZZL8_HUMAN 10 kDa heat shock protein, mitochondrial OS=Homo sapiens GN=HSPE1 PE=1 SV=1;tr|B8ZZ54|B8ZZ54_HUMAN 10 kDa heat shock protein, mitochondr	4	5	5	5	5	4	5	4	3	4	4	4	2	4	4	5	5	4	5	4	3	4	4	4	2	4	4	5	5	4	5	4	3	4	4	4	2	4	4	5	52	52
P61978;Q5T6W2;S4R457;S4R359	P61978;Q5T6W2	9;7;2;2	9;7;2;2	9;7;2;2	Heterogeneous nuclear ribonucleoprotein K	HNRNPK	sp|P61978|HNRPK_HUMAN Heterogeneous nuclear ribonucleoprotein K OS=Homo sapiens GN=HNRNPK PE=1 SV=1;tr|Q5T6W2|Q5T6W2_HUMAN Heterogeneous nuclear ribonucleoprotein K (Fragment) OS=Homo sapiens GN=HNRNPK PE=1 SV=1	4	9	9	9	7	5	7	6	6	5	8	7	7	7	7	5	7	5	7	6	6	5	8	7	7	7	7	5	7	5	7	6	6	5	8	7	7	7	7	5	28.1	28.1
P62081;B5MCP9	P62081;B5MCP9	5;4	5;4	5;4	40S ribosomal protein S7	RPS7	sp|P62081|RS7_HUMAN 40S ribosomal protein S7 OS=Homo sapiens GN=RPS7 PE=1 SV=1;tr|B5MCP9|B5MCP9_HUMAN 40S ribosomal protein S7 OS=Homo sapiens GN=RPS7 PE=1 SV=1	2	5	5	5	5	5	5	4	5	4	5	5	5	5	5	5	5	5	5	4	5	4	5	5	5	5	5	5	5	5	5	4	5	4	5	5	5	5	5	5	41.8	41.8
P62191	P62191	3	3	3	26S protease regulatory subunit 4	PSMC1	sp|P62191|PRS4_HUMAN 26S protease regulatory subunit 4 OS=Homo sapiens GN=PSMC1 PE=1 SV=1	1	3	3	3	1	0	2	1	2	2	1	1	2	1	2	1	1	0	2	1	2	2	1	1	2	1	2	1	1	0	2	1	2	2	1	1	2	1	2	1	10.5	10.5
P62241;Q5JR95	P62241;Q5JR95	8;7	8;7	8;7	40S ribosomal protein S8	RPS8	sp|P62241|RS8_HUMAN 40S ribosomal protein S8 OS=Homo sapiens GN=RPS8 PE=1 SV=2;tr|Q5JR95|Q5JR95_HUMAN 40S ribosomal protein S8 OS=Homo sapiens GN=RPS8 PE=1 SV=1	2	8	8	8	8	8	7	7	8	8	8	8	7	8	8	7	8	8	7	7	8	8	8	8	7	8	8	7	8	8	7	7	8	8	8	8	7	8	8	7	45.7	45.7
P62249;M0R3H0;M0R210;A0A087WZ27;Q6IPX4;M0R1M5;M0QX76	P62249;M0R3H0;M0R210;A0A087WZ27;Q6IPX4;M0R1M5	5;4;4;4;4;3;2	5;4;4;4;4;3;2	5;4;4;4;4;3;2	40S ribosomal protein S16	RPS16;ZNF90	sp|P62249|RS16_HUMAN 40S ribosomal protein S16 OS=Homo sapiens GN=RPS16 PE=1 SV=2;tr|M0R3H0|M0R3H0_HUMAN 40S ribosomal protein S16 OS=Homo sapiens GN=RPS16 PE=1 SV=1;tr|M0R210|M0R210_HUMAN 40S ribosomal protein S16 OS=Homo sapiens GN=RPS16 PE=1 SV=1;tr|A0A	7	5	5	5	2	4	3	3	5	5	4	4	4	4	4	3	2	4	3	3	5	5	4	4	4	4	4	3	2	4	3	3	5	5	4	4	4	4	4	3	30.1	30.1
P62258;B4DJF2;I3L3T1;K7EM20;K7EIT4;I3L0W5;F8WEB6;A2IDB1	P62258	16;5;5;5;4;3;1;1	13;3;3;4;3;2;0;0	13;3;3;4;3;2;0;0	14-3-3 protein epsilon	YWHAE	sp|P62258|1433E_HUMAN 14-3-3 protein epsilon OS=Homo sapiens GN=YWHAE PE=1 SV=1	8	16	13	13	15	14	13	13	14	14	14	16	14	14	15	15	12	11	10	10	11	11	11	13	11	11	12	12	12	11	10	10	11	11	11	13	11	11	12	12	66.7	56.9
P62263;H0YB22;E5RH77	P62263;H0YB22;E5RH77	2;1;1	2;1;1	2;1;1	40S ribosomal protein S14	RPS14	sp|P62263|RS14_HUMAN 40S ribosomal protein S14 OS=Homo sapiens GN=RPS14 PE=1 SV=3;tr|H0YB22|H0YB22_HUMAN 40S ribosomal protein S14 (Fragment) OS=Homo sapiens GN=RPS14 PE=1 SV=1;tr|E5RH77|E5RH77_HUMAN 40S ribosomal protein S14 OS=Homo sapiens GN=RPS14 PE=1	3	2	2	2	2	2	2	2	2	2	2	2	2	2	2	2	2	2	2	2	2	2	2	2	2	2	2	2	2	2	2	2	2	2	2	2	2	2	2	2	15.9	15.9
P62266;D6RD47;D6RDJ2;D6RIX0;D6R9I7	P62266;D6RD47;D6RDJ2;D6RIX0;D6R9I7	4;3;2;2;2	4;3;2;2;2	4;3;2;2;2	40S ribosomal protein S23	RPS23	sp|P62266|RS23_HUMAN 40S ribosomal protein S23 OS=Homo sapiens GN=RPS23 PE=1 SV=3;tr|D6RD47|D6RD47_HUMAN 40S ribosomal protein S23 OS=Homo sapiens GN=RPS23 PE=1 SV=1;tr|D6RDJ2|D6RDJ2_HUMAN 40S ribosomal protein S23 OS=Homo sapiens GN=RPS23 PE=1 SV=1;tr|D6R	5	4	4	4	4	4	4	4	4	4	4	4	4	4	4	4	4	4	4	4	4	4	4	4	4	4	4	4	4	4	4	4	4	4	4	4	4	4	4	4	28.7	28.7
P62269;A0A0G2JQH2;Q5GGW2;J3JS69	P62269	8;2;2;2	8;2;2;2	8;2;2;2	40S ribosomal protein S18	RPS18	sp|P62269|RS18_HUMAN 40S ribosomal protein S18 OS=Homo sapiens GN=RPS18 PE=1 SV=3	4	8	8	8	5	5	5	4	5	4	4	5	6	6	6	6	5	5	5	4	5	4	4	5	6	6	6	6	5	5	5	4	5	4	4	5	6	6	6	6	44.1	44.1
P62277;J3KMX5;E9PS50	P62277;J3KMX5	5;3;1	5;3;1	5;3;1	40S ribosomal protein S13	RPS13	sp|P62277|RS13_HUMAN 40S ribosomal protein S13 OS=Homo sapiens GN=RPS13 PE=1 SV=2;tr|J3KMX5|J3KMX5_HUMAN 40S ribosomal protein S13 OS=Homo sapiens GN=RPS13 PE=1 SV=1	3	5	5	5	5	5	5	4	5	5	5	5	5	5	4	4	5	5	5	4	5	5	5	5	5	5	4	4	5	5	5	4	5	5	5	5	5	5	4	4	36.4	36.4
P62280;M0QZC5;M0R1H5;M0R1H6	P62280;M0QZC5	11;10;3;3	11;10;3;3	11;10;3;3	40S ribosomal protein S11	RPS11	sp|P62280|RS11_HUMAN 40S ribosomal protein S11 OS=Homo sapiens GN=RPS11 PE=1 SV=3;tr|M0QZC5|M0QZC5_HUMAN 40S ribosomal protein S11 OS=Homo sapiens GN=RPS11 PE=1 SV=1	4	11	11	11	9	8	9	3	8	9	8	8	7	8	7	6	9	8	9	3	8	9	8	8	7	8	7	6	9	8	9	3	8	9	8	8	7	8	7	6	60.8	60.8
P62314;J3QLR7;J3QLI9	P62314	3;1;1	3;1;1	3;1;1	Small nuclear ribonucleoprotein Sm D1	SNRPD1	sp|P62314|SMD1_HUMAN Small nuclear ribonucleoprotein Sm D1 OS=Homo sapiens GN=SNRPD1 PE=1 SV=1	3	3	3	3	2	3	2	3	2	3	2	3	3	3	3	3	2	3	2	3	2	3	2	3	3	3	3	3	2	3	2	3	2	3	2	3	3	3	3	3	36.1	36.1
P62316;K7ERG4;K7EJB5	P62316;K7ERG4	4;2;1	4;2;1	4;2;1	Small nuclear ribonucleoprotein Sm D2	SNRPD2	sp|P62316|SMD2_HUMAN Small nuclear ribonucleoprotein Sm D2 OS=Homo sapiens GN=SNRPD2 PE=1 SV=1;tr|K7ERG4|K7ERG4_HUMAN Small nuclear ribonucleoprotein Sm D2 OS=Homo sapiens GN=SNRPD2 PE=1 SV=1	3	4	4	4	1	1	0	0	2	2	3	2	1	2	1	2	1	1	0	0	2	2	3	2	1	2	1	2	1	1	0	0	2	2	3	2	1	2	1	2	29.7	29.7
P62318;H3BT13	P62318;H3BT13	2;1	2;1	2;1	Small nuclear ribonucleoprotein Sm D3	SNRPD3	sp|P62318|SMD3_HUMAN Small nuclear ribonucleoprotein Sm D3 OS=Homo sapiens GN=SNRPD3 PE=1 SV=1;tr|H3BT13|H3BT13_HUMAN Small nuclear ribonucleoprotein Sm D3 OS=Homo sapiens GN=SNRPD3 PE=1 SV=1	2	2	2	2	2	1	2	0	1	0	1	1	1	1	1	1	2	1	2	0	1	0	1	1	1	1	1	1	2	1	2	0	1	0	1	1	1	1	1	1	23.8	23.8
P62424;Q5T8U3;Q5T8U2	P62424;Q5T8U3	11;8;4	11;8;4	11;8;4	60S ribosomal protein L7a	RPL7A	sp|P62424|RL7A_HUMAN 60S ribosomal protein L7a OS=Homo sapiens GN=RPL7A PE=1 SV=2;tr|Q5T8U3|Q5T8U3_HUMAN 60S ribosomal protein L7a (Fragment) OS=Homo sapiens GN=RPL7A PE=1 SV=1	3	11	11	11	11	10	11	10	10	10	10	11	11	11	11	10	11	10	11	10	10	10	10	11	11	11	11	10	11	10	11	10	10	10	10	11	11	11	11	10	37.2	37.2
P62633	P62633	5	5	5	Cellular nucleic acid-binding protein	CNBP	sp|P62633|CNBP_HUMAN Cellular nucleic acid-binding protein OS=Homo sapiens GN=CNBP PE=1 SV=1	1	5	5	5	3	4	4	4	3	3	4	4	5	5	4	5	3	4	4	4	3	3	4	4	5	5	4	5	3	4	4	4	3	3	4	4	5	5	4	5	35	35
P62701;C9JEH7;P22090;Q8TD47	P62701	14;6;6;5	14;6;6;5	14;6;6;5	40S ribosomal protein S4, X isoform	RPS4X	sp|P62701|RS4X_HUMAN 40S ribosomal protein S4, X isoform OS=Homo sapiens GN=RPS4X PE=1 SV=2	4	14	14	14	12	12	12	11	12	13	13	12	13	12	11	12	12	12	12	11	12	13	13	12	13	12	11	12	12	12	12	11	12	13	13	12	13	12	11	12	53.6	53.6
P62753;A2A3R5;A2A3R7	P62753;A2A3R5	8;6;3	8;6;3	8;6;3	40S ribosomal protein S6	RPS6	sp|P62753|RS6_HUMAN 40S ribosomal protein S6 OS=Homo sapiens GN=RPS6 PE=1 SV=1;tr|A2A3R5|A2A3R5_HUMAN 40S ribosomal protein S6 OS=Homo sapiens GN=RPS6 PE=1 SV=1	3	8	8	8	8	8	8	5	7	7	7	8	7	6	8	7	8	8	8	5	7	7	7	8	7	6	8	7	8	8	8	5	7	7	7	8	7	6	8	7	35.7	35.7
P62805	P62805	7	7	7	Histone H4	HIST1H4A	sp|P62805|H4_HUMAN Histone H4 OS=Homo sapiens GN=HIST1H4A PE=1 SV=2	1	7	7	7	7	7	7	7	4	5	5	5	7	6	6	7	7	7	7	7	4	5	5	5	7	6	6	7	7	7	7	7	4	5	5	5	7	6	6	7	57.3	57.3
P62829;C9JD32;B9ZVP7;J3KT29;J3KTJ3	P62829;C9JD32;B9ZVP7;J3KT29	3;2;2;2;1	3;2;2;2;1	3;2;2;2;1	60S ribosomal protein L23	RPL23	sp|P62829|RL23_HUMAN 60S ribosomal protein L23 OS=Homo sapiens GN=RPL23 PE=1 SV=1;tr|C9JD32|C9JD32_HUMAN 60S ribosomal protein L23 (Fragment) OS=Homo sapiens GN=RPL23 PE=1 SV=1;tr|B9ZVP7|B9ZVP7_HUMAN 60S ribosomal protein L23 OS=Homo sapiens GN=RPL23 PE=1	5	3	3	3	2	2	2	0	2	3	3	1	1	1	2	2	2	2	2	0	2	3	3	1	1	1	2	2	2	2	2	0	2	3	3	1	1	1	2	2	27.1	27.1
P62851	P62851	5	5	5	40S ribosomal protein S25	RPS25	sp|P62851|RS25_HUMAN 40S ribosomal protein S25 OS=Homo sapiens GN=RPS25 PE=1 SV=1	1	5	5	5	5	5	5	5	5	5	5	5	5	5	5	5	5	5	5	5	5	5	5	5	5	5	5	5	5	5	5	5	5	5	5	5	5	5	5	5	29.6	29.6
P62854;Q5JNZ5	P62854;Q5JNZ5	3;2	3;2	3;2	40S ribosomal protein S26;Putative 40S ribosomal protein S26-like 1	RPS26;RPS26P11	sp|P62854|RS26_HUMAN 40S ribosomal protein S26 OS=Homo sapiens GN=RPS26 PE=1 SV=3;sp|Q5JNZ5|RS26L_HUMAN Putative 40S ribosomal protein S26-like 1 OS=Homo sapiens GN=RPS26P11 PE=5 SV=1	2	3	3	3	2	2	3	3	3	2	2	3	3	3	2	3	2	2	3	3	3	2	2	3	3	3	2	3	2	2	3	3	3	2	2	3	3	3	2	3	27	27
P62857	P62857	1	1	1	40S ribosomal protein S28	RPS28	sp|P62857|RS28_HUMAN 40S ribosomal protein S28 OS=Homo sapiens GN=RPS28 PE=1 SV=1	1	1	1	1	1	1	0	1	0	0	1	1	1	1	1	1	1	1	0	1	0	0	1	1	1	1	1	1	1	1	0	1	0	0	1	1	1	1	1	1	17.4	17.4
Q59GN2;P62891	Q59GN2;P62891	2;2	2;2	2;2	Putative 60S ribosomal protein L39-like 5;60S ribosomal protein L39	RPL39P5;RPL39	sp|Q59GN2|R39L5_HUMAN Putative 60S ribosomal protein L39-like 5 OS=Homo sapiens GN=RPL39P5 PE=5 SV=2;sp|P62891|RL39_HUMAN 60S ribosomal protein L39 OS=Homo sapiens GN=RPL39 PE=1 SV=2	2	2	2	2	2	2	2	2	2	2	2	2	2	2	2	2	2	2	2	2	2	2	2	2	2	2	2	2	2	2	2	2	2	2	2	2	2	2	2	2	19.6	19.6
P62899;H7C2W9;C9JU56;B7Z4E3;B7Z4C8;B8ZZK4	P62899;H7C2W9;C9JU56;B7Z4E3;B7Z4C8;B8ZZK4	5;4;4;4;4;3	5;4;4;4;4;3	5;4;4;4;4;3	60S ribosomal protein L31	RPL31	sp|P62899|RL31_HUMAN 60S ribosomal protein L31 OS=Homo sapiens GN=RPL31 PE=1 SV=1;tr|H7C2W9|H7C2W9_HUMAN 60S ribosomal protein L31 (Fragment) OS=Homo sapiens GN=RPL31 PE=1 SV=1;tr|C9JU56|C9JU56_HUMAN 60S ribosomal protein L31 (Fragment) OS=Homo sapiens GN=	6	5	5	5	5	5	5	5	5	5	5	5	5	5	5	5	5	5	5	5	5	5	5	5	5	5	5	5	5	5	5	5	5	5	5	5	5	5	5	5	38.4	38.4
P62906	P62906	5	5	5	60S ribosomal protein L10a	RPL10A	sp|P62906|RL10A_HUMAN 60S ribosomal protein L10a OS=Homo sapiens GN=RPL10A PE=1 SV=2	1	5	5	5	2	3	3	1	4	5	5	5	4	5	3	4	2	3	3	1	4	5	5	5	4	5	3	4	2	3	3	1	4	5	5	5	4	5	3	4	27.2	27.2
P62913;Q5VVC9;Q5VVC8	P62913;Q5VVC9;Q5VVC8	3;2;2	3;2;2	3;2;2	60S ribosomal protein L11	RPL11	sp|P62913|RL11_HUMAN 60S ribosomal protein L11 OS=Homo sapiens GN=RPL11 PE=1 SV=2;tr|Q5VVC9|Q5VVC9_HUMAN 60S ribosomal protein L11 (Fragment) OS=Homo sapiens GN=RPL11 PE=1 SV=1;tr|Q5VVC8|Q5VVC8_HUMAN 60S ribosomal protein L11 (Fragment) OS=Homo sapiens GN=	3	3	3	3	2	1	2	1	2	2	1	3	1	2	2	1	2	1	2	1	2	2	1	3	1	2	2	1	2	1	2	1	2	2	1	3	1	2	2	1	16.9	16.9
P62917;E9PKU4;E9PKZ0;E9PP36;G3V1A1	P62917;E9PKU4;E9PKZ0;E9PP36;G3V1A1	7;6;5;4;4	7;6;5;4;4	7;6;5;4;4	60S ribosomal protein L8	RPL8	sp|P62917|RL8_HUMAN 60S ribosomal protein L8 OS=Homo sapiens GN=RPL8 PE=1 SV=2;tr|E9PKU4|E9PKU4_HUMAN 60S ribosomal protein L8 (Fragment) OS=Homo sapiens GN=RPL8 PE=1 SV=1;tr|E9PKZ0|E9PKZ0_HUMAN 60S ribosomal protein L8 (Fragment) OS=Homo sapiens GN=RPL8 P	5	7	7	7	5	7	7	5	6	4	6	6	4	6	7	6	5	7	7	5	6	4	6	6	4	6	7	6	5	7	7	5	6	4	6	6	4	6	7	6	38.1	38.1
P62937;F8WE65;C9J5S7;E5RIZ5;P0DN26;A0A0H2UH34;A0A0B4J2A2;A0A075B767;A0A075B759;Q9Y536;F5H284	P62937;F8WE65;C9J5S7	8;5;5;1;1;1;1;1;1;1;1	8;5;5;1;1;1;1;1;1;1;1	8;5;5;1;1;1;1;1;1;1;1	Peptidyl-prolyl cis-trans isomerase A;Peptidyl-prolyl cis-trans isomerase A, N-terminally processed;Peptidyl-prolyl cis-trans isomerase	PPIA	sp|P62937|PPIA_HUMAN Peptidyl-prolyl cis-trans isomerase A OS=Homo sapiens GN=PPIA PE=1 SV=2;tr|F8WE65|F8WE65_HUMAN Peptidyl-prolyl cis-trans isomerase OS=Homo sapiens GN=PPIA PE=1 SV=1;tr|C9J5S7|C9J5S7_HUMAN Peptidyl-prolyl cis-trans isomerase OS=Homo sap	11	8	8	8	8	6	7	5	7	6	8	8	7	8	8	7	8	6	7	5	7	6	8	8	7	8	8	7	8	6	7	5	7	6	8	8	7	8	8	7	60	60
P62942;Q5W0X3;A0A087WZM5;Q1JUQ5;Q1JUQ3;A0A087WTS4;Q5VVH2;A0A087WV48	P62942;Q5W0X3;A0A087WZM5;Q1JUQ5	4;3;3;2;1;1;1;1	4;3;3;2;1;1;1;1	4;3;3;2;1;1;1;1	Peptidyl-prolyl cis-trans isomerase FKBP1A;Peptidyl-prolyl cis-trans isomerase	FKBP1A;FKBP12-Exip2	sp|P62942|FKB1A_HUMAN Peptidyl-prolyl cis-trans isomerase FKBP1A OS=Homo sapiens GN=FKBP1A PE=1 SV=2;tr|Q5W0X3|Q5W0X3_HUMAN Peptidyl-prolyl cis-trans isomerase OS=Homo sapiens GN=FKBP1A PE=1 SV=1;tr|A0A087WZM5|A0A087WZM5_HUMAN Peptidyl-prolyl cis-trans iso	8	4	4	4	1	0	1	2	0	2	1	3	0	2	3	2	1	0	1	2	0	2	1	3	0	2	3	2	1	0	1	2	0	2	1	3	0	2	3	2	50	50
P62979;J3QS39;J3QTR3;F5H6Q2;F5GYU3;F5H2Z3;F5H265;B4DV12;F5H388;F5H747;F5GXK7;J3QKN0;Q5PY61;Q96C32;P62987;P0CG47;P0CG48;M0R1V7;M0R1M6;M0R2S1;J3QSA3;F5GZ39	P62979;J3QS39;J3QTR3;F5H6Q2;F5GYU3;F5H2Z3;F5H265;B4DV12;F5H388;F5H747;F5GXK7;J3QKN0;Q5PY61;Q96C32;P62987;P0CG47;P0CG48	5;3;3;3;3;3;3;3;3;3;3;3;3;3;3;3;3;2;2;2;1;1	5;3;3;3;3;3;3;3;3;3;3;3;3;3;3;3;3;2;2;2;1;1	5;3;3;3;3;3;3;3;3;3;3;3;3;3;3;3;3;2;2;2;1;1	Ubiquitin-40S ribosomal protein S27a;Ubiquitin;40S ribosomal protein S27a;Ubiquitin-60S ribosomal protein L40;Ubiquitin;60S ribosomal protein L40;Polyubiquitin-B;Ubiquitin;Polyubiquitin-C;Ubiquitin	RPS27A;UBB;UBC;UBA52	sp|P62979|RS27A_HUMAN Ubiquitin-40S ribosomal protein S27a OS=Homo sapiens GN=RPS27A PE=1 SV=2;tr|J3QS39|J3QS39_HUMAN Polyubiquitin-B (Fragment) OS=Homo sapiens GN=UBB PE=1 SV=1;tr|J3QTR3|J3QTR3_HUMAN Ubiquitin-40S ribosomal protein S27a (Fragment) OS=Homo	22	5	5	5	5	5	5	5	5	5	5	5	5	5	5	5	5	5	5	5	5	5	5	5	5	5	5	5	5	5	5	5	5	5	5	5	5	5	5	5	42.3	42.3
P62993;J3KT38;J3QRL5;J3QLF6	P62993	10;4;3;1	10;4;3;1	10;4;3;1	Growth factor receptor-bound protein 2	GRB2	sp|P62993|GRB2_HUMAN Growth factor receptor-bound protein 2 OS=Homo sapiens GN=GRB2 PE=1 SV=1	4	10	10	10	10	9	9	10	6	7	7	9	6	7	8	8	10	9	9	10	6	7	7	9	6	7	8	8	10	9	9	10	6	7	7	9	6	7	8	8	48.8	48.8
P62995;H7C2L4;H7BXF3	P62995;H7C2L4;H7BXF3	12;7;7	12;7;7	11;7;6	Transformer-2 protein homolog beta	TRA2B	sp|P62995|TRA2B_HUMAN Transformer-2 protein homolog beta OS=Homo sapiens GN=TRA2B PE=1 SV=1;tr|H7C2L4|H7C2L4_HUMAN Transformer-2 protein homolog beta (Fragment) OS=Homo sapiens GN=TRA2B PE=1 SV=1;tr|H7BXF3|H7BXF3_HUMAN Transformer-2 protein homolog beta (F	3	12	12	11	12	12	12	12	12	12	11	12	12	12	12	12	12	12	12	12	12	12	11	12	12	12	12	12	11	11	11	11	11	11	10	11	11	11	11	11	44.4	44.4
P63104;E7EX29;B0AZS6;B7Z2E6;H0YB80;E7ESK7;E5RIR4;E9PD24;E7EVZ2;E5RGE1	P63104;E7EX29;B0AZS6;B7Z2E6;H0YB80;E7ESK7	16;14;10;8;8;8;6;6;6;5	16;14;10;8;8;8;6;6;6;5	11;9;7;5;5;6;4;4;4;3	14-3-3 protein zeta/delta	YWHAZ	sp|P63104|1433Z_HUMAN 14-3-3 protein zeta/delta OS=Homo sapiens GN=YWHAZ PE=1 SV=1;tr|E7EX29|E7EX29_HUMAN 14-3-3 protein zeta/delta (Fragment) OS=Homo sapiens GN=YWHAZ PE=1 SV=1;tr|B0AZS6|B0AZS6_HUMAN 14-3-3 protein zeta/delta OS=Homo sapiens GN=YWHAZ PE=1	10	16	16	11	15	15	15	16	16	15	16	15	16	16	16	16	15	15	15	16	16	15	16	15	16	16	16	16	10	10	10	11	11	10	11	10	11	11	11	11	60.4	60.4
P63173;J3KT73;J3QL01;J3KSP2	P63173;J3KT73;J3QL01	3;2;2;1	3;2;2;1	3;2;2;1	60S ribosomal protein L38	RPL38	sp|P63173|RL38_HUMAN 60S ribosomal protein L38 OS=Homo sapiens GN=RPL38 PE=1 SV=2;tr|J3KT73|J3KT73_HUMAN 60S ribosomal protein L38 OS=Homo sapiens GN=RPL38 PE=1 SV=1;tr|J3QL01|J3QL01_HUMAN 60S ribosomal protein L38 OS=Homo sapiens GN=RPL38 PE=1 SV=1	4	3	3	3	3	3	3	3	3	2	3	3	3	3	2	3	3	3	3	3	3	2	3	3	3	3	2	3	3	3	3	3	3	2	3	3	3	3	2	3	38.6	38.6
P63261;I3L3I0;I3L1U9;I3L4N8;K7EM38;I3L3R2;J3KT65	P63261;I3L3I0;I3L1U9;I3L4N8	16;9;9;8;7;7;7	16;9;9;8;7;7;7	1;1;1;1;1;1;1	Actin, cytoplasmic 2;Actin, cytoplasmic 2, N-terminally processed	ACTG1	sp|P63261|ACTG_HUMAN Actin, cytoplasmic 2 OS=Homo sapiens GN=ACTG1 PE=1 SV=1;tr|I3L3I0|I3L3I0_HUMAN Actin, cytoplasmic 2 (Fragment) OS=Homo sapiens GN=ACTG1 PE=1 SV=1;tr|I3L1U9|I3L1U9_HUMAN Actin, cytoplasmic 2 (Fragment) OS=Homo sapiens GN=ACTG1 PE=1 SV=1	7	16	16	1	15	15	16	15	16	15	16	16	16	16	15	14	15	15	16	15	16	15	16	16	16	16	15	14	1	1	1	1	1	1	1	1	1	1	1	1	59.7	59.7
P63313	P63313	1	1	1	Thymosin beta-10	TMSB10	sp|P63313|TYB10_HUMAN Thymosin beta-10 OS=Homo sapiens GN=TMSB10 PE=1 SV=2	1	1	1	1	1	1	1	1	1	1	1	1	1	1	1	1	1	1	1	1	1	1	1	1	1	1	1	1	1	1	1	1	1	1	1	1	1	1	1	1	31.8	31.8
P67809;A0A087X1S2;H0Y449;C9J5V9;Q9Y2T7	P67809;A0A087X1S2;H0Y449	14;11;11;6;4	14;11;11;6;4	10;7;9;5;0	Nuclease-sensitive element-binding protein 1	YBX1	sp|P67809|YBOX1_HUMAN Nuclease-sensitive element-binding protein 1 OS=Homo sapiens GN=YBX1 PE=1 SV=3;tr|A0A087X1S2|A0A087X1S2_HUMAN Nuclease-sensitive element-binding protein 1 OS=Homo sapiens GN=YBX1 PE=1 SV=2;tr|H0Y449|H0Y449_HUMAN Nuclease-sensitive ele	5	14	14	10	12	14	14	13	14	13	13	14	13	14	14	14	12	14	14	13	14	13	13	14	13	14	14	14	9	10	10	10	10	10	9	10	9	10	10	10	58.6	58.6
P67936;K7ENT6;K7ERG3;K7EMU5;K7EPV9;K7EPB9;U3KQK2	P67936;K7ENT6;K7ERG3	11;7;6;4;3;3;3	5;2;1;2;2;2;2	3;0;0;0;0;1;0	Tropomyosin alpha-4 chain	TPM4	sp|P67936|TPM4_HUMAN Tropomyosin alpha-4 chain OS=Homo sapiens GN=TPM4 PE=1 SV=3;tr|K7ENT6|K7ENT6_HUMAN Tropomyosin alpha-4 chain (Fragment) OS=Homo sapiens GN=TPM4 PE=1 SV=1;tr|K7ERG3|K7ERG3_HUMAN Tropomyosin alpha-4 chain (Fragment) OS=Homo sapiens GN=TP	7	11	5	3	10	10	10	9	9	10	9	9	7	8	8	9	4	4	4	3	4	4	3	3	2	3	2	3	3	2	2	1	2	2	1	1	0	1	0	1	39.9	20.6
P68133;P68032;P63267;P62736;A6NL76;F8WB63;B8ZZJ2;C9JFL5;F6UVQ4;F6QUT6	P68133;P68032;P63267;P62736;A6NL76;F8WB63;B8ZZJ2;C9JFL5;F6UVQ4;F6QUT6	10;10;9;9;8;5;5;5;5;5	1;1;1;1;1;1;1;1;1;1	1;1;1;1;1;1;1;1;1;1	Actin, alpha skeletal muscle;Actin, alpha cardiac muscle 1;Actin, gamma-enteric smooth muscle;Actin, aortic smooth muscle	ACTA1;ACTC1;ACTG2;ACTA2	sp|P68133|ACTS_HUMAN Actin, alpha skeletal muscle OS=Homo sapiens GN=ACTA1 PE=1 SV=1;sp|P68032|ACTC_HUMAN Actin, alpha cardiac muscle 1 OS=Homo sapiens GN=ACTC1 PE=1 SV=1;sp|P63267|ACTH_HUMAN Actin, gamma-enteric smooth muscle OS=Homo sapiens GN=ACTG2 PE=1	10	10	1	1	10	10	10	10	10	9	10	10	10	10	10	8	1	1	1	1	1	1	1	1	1	1	1	1	1	1	1	1	1	1	1	1	1	1	1	1	29.2	4.2
Q5VTE0;P68104;A0A087WVQ9;A0A087WV01;Q05639;A6PW80;Q5JR01	Q5VTE0;P68104;A0A087WVQ9;A0A087WV01	16;16;14;11;7;3;3	16;16;14;11;7;3;3	16;16;14;11;7;3;3	Putative elongation factor 1-alpha-like 3;Elongation factor 1-alpha 1;Elongation factor 1-alpha	EEF1A1P5;EEF1A1	sp|Q5VTE0|EF1A3_HUMAN Putative elongation factor 1-alpha-like 3 OS=Homo sapiens GN=EEF1A1P5 PE=5 SV=1;sp|P68104|EF1A1_HUMAN Elongation factor 1-alpha 1 OS=Homo sapiens GN=EEF1A1 PE=1 SV=1;tr|A0A087WVQ9|A0A087WVQ9_HUMAN Elongation factor 1-alpha 1 OS=Homo s	7	16	16	16	16	16	15	14	15	14	15	15	16	15	15	15	16	16	15	14	15	14	15	15	16	15	15	15	16	16	15	14	15	14	15	15	16	15	15	15	37.4	37.4
P68363;P68366;C9JDS9	P68363;P68366	16;12;4	16;12;4	1;1;0	Tubulin alpha-1B chain;Tubulin alpha-4A chain	TUBA1B;TUBA4A	sp|P68363|TBA1B_HUMAN Tubulin alpha-1B chain OS=Homo sapiens GN=TUBA1B PE=1 SV=1;sp|P68366|TBA4A_HUMAN Tubulin alpha-4A chain OS=Homo sapiens GN=TUBA4A PE=1 SV=1	3	16	16	1	15	15	13	14	16	15	16	14	15	14	16	16	15	15	13	14	16	15	16	14	15	14	16	16	1	1	1	1	1	1	1	1	1	1	1	1	50.1	50.1
P68371;P04350;Q3ZCM7;M0QY85;M0R2D3;M0QZL7;M0R278;M0R0X0;M0QY37;M0QX14;M0QYM7;A0A075B724	P68371;P04350	16;12;7;3;3;3;3;2;2;2;2;1	3;2;1;2;1;2;2;2;2;2;1;1	3;2;1;2;1;2;2;2;2;2;1;1	Tubulin beta-4B chain;Tubulin beta-4A chain	TUBB4B;TUBB4A	sp|P68371|TBB4B_HUMAN Tubulin beta-4B chain OS=Homo sapiens GN=TUBB4B PE=1 SV=1;sp|P04350|TBB4A_HUMAN Tubulin beta-4A chain OS=Homo sapiens GN=TUBB4A PE=1 SV=2	12	16	3	3	12	12	12	10	13	11	12	12	12	11	11	12	2	2	2	2	2	2	3	2	2	2	2	2	2	2	2	2	2	2	3	2	2	2	2	2	48.3	12.1
P78371;F5GWF6;F8VQ14	P78371;F5GWF6;F8VQ14	12;11;10	12;11;10	12;11;10	T-complex protein 1 subunit beta	CCT2	sp|P78371|TCPB_HUMAN T-complex protein 1 subunit beta OS=Homo sapiens GN=CCT2 PE=1 SV=4;tr|F5GWF6|F5GWF6_HUMAN T-complex protein 1 subunit beta OS=Homo sapiens GN=CCT2 PE=1 SV=2;tr|F8VQ14|F8VQ14_HUMAN T-complex protein 1 subunit beta OS=Homo sapiens GN=CCT	3	12	12	12	10	10	11	9	11	11	12	12	10	11	12	11	10	10	11	9	11	11	12	12	10	11	12	11	10	10	11	9	11	11	12	12	10	11	12	11	34	34
Q5TA02;P78417;Q5TA01	Q5TA02;P78417;Q5TA01	4;4;2	4;4;2	4;4;2	Glutathione S-transferase omega-1	GSTO1	tr|Q5TA02|Q5TA02_HUMAN Glutathione S-transferase omega-1 (Fragment) OS=Homo sapiens GN=GSTO1 PE=1 SV=1;sp|P78417|GSTO1_HUMAN Glutathione S-transferase omega-1 OS=Homo sapiens GN=GSTO1 PE=1 SV=2;tr|Q5TA01|Q5TA01_HUMAN Glutathione S-transferase omega-1 (Frag	3	4	4	4	3	3	3	2	2	2	1	3	1	1	2	1	3	3	3	2	2	2	1	3	1	1	2	1	3	3	3	2	2	2	1	3	1	1	2	1	18	18
P81605	P81605	2	2	2	Dermcidin;Survival-promoting peptide;DCD-1	DCD	sp|P81605|DCD_HUMAN Dermcidin OS=Homo sapiens GN=DCD PE=1 SV=2	1	2	2	2	2	2	2	2	2	2	2	2	2	2	2	2	2	2	2	2	2	2	2	2	2	2	2	2	2	2	2	2	2	2	2	2	2	2	2	2	20	20
P84103;A0A087X2D0	P84103;A0A087X2D0	8;5	7;4	7;4	Serine/arginine-rich splicing factor 3	SRSF3	sp|P84103|SRSF3_HUMAN Serine/arginine-rich splicing factor 3 OS=Homo sapiens GN=SRSF3 PE=1 SV=1;tr|A0A087X2D0|A0A087X2D0_HUMAN Serine/arginine-rich-splicing factor 3 OS=Homo sapiens GN=SRSF3 PE=1 SV=1	2	8	7	7	8	8	8	8	8	8	8	8	7	8	8	8	7	7	7	7	7	7	7	7	6	7	7	7	7	7	7	7	7	7	7	7	6	7	7	7	41.5	32.9
Q00688	Q00688	5	5	5	Peptidyl-prolyl cis-trans isomerase FKBP3	FKBP3	sp|Q00688|FKBP3_HUMAN Peptidyl-prolyl cis-trans isomerase FKBP3 OS=Homo sapiens GN=FKBP3 PE=1 SV=1	1	5	5	5	5	5	4	5	4	5	5	5	4	4	4	4	5	5	4	5	4	5	5	5	4	4	4	4	5	5	4	5	4	5	5	5	4	4	4	4	27.7	27.7
Q00839;Q5RI18	Q00839	8;1	8;1	8;1	Heterogeneous nuclear ribonucleoprotein U	HNRNPU	sp|Q00839|HNRPU_HUMAN Heterogeneous nuclear ribonucleoprotein U OS=Homo sapiens GN=HNRNPU PE=1 SV=6	2	8	8	8	5	5	3	3	4	4	6	5	5	5	6	5	5	5	3	3	4	4	6	5	5	5	6	5	5	5	3	3	4	4	6	5	5	5	6	5	13.7	13.7
Q01082;A0A087WUZ3;F8W6C1	Q01082;A0A087WUZ3	30;28;4	30;28;4	30;28;4	Spectrin beta chain, non-erythrocytic 1	SPTBN1	sp|Q01082|SPTB2_HUMAN Spectrin beta chain, non-erythrocytic 1 OS=Homo sapiens GN=SPTBN1 PE=1 SV=2;tr|A0A087WUZ3|A0A087WUZ3_HUMAN Spectrin beta chain, non-erythrocytic 1 OS=Homo sapiens GN=SPTBN1 PE=1 SV=1	3	30	30	30	21	18	22	15	17	19	18	17	21	21	21	17	21	18	22	15	17	19	18	17	21	21	21	17	21	18	22	15	17	19	18	17	21	21	21	17	16.7	16.7
Q01469;I6L8B7;A8MUU1	Q01469;I6L8B7	5;3;1	5;3;1	5;3;1	Fatty acid-binding protein, epidermal	FABP5	sp|Q01469|FABP5_HUMAN Fatty acid-binding protein, epidermal OS=Homo sapiens GN=FABP5 PE=1 SV=3;tr|I6L8B7|I6L8B7_HUMAN Fatty acid-binding protein, epidermal OS=Homo sapiens GN=FABP5 PE=1 SV=1	3	5	5	5	5	5	5	5	5	5	4	5	5	5	5	5	5	5	5	5	5	5	4	5	5	5	5	5	5	5	5	5	5	5	4	5	5	5	5	5	45.9	45.9
Q02413	Q02413	3	3	3	Desmoglein-1	DSG1	sp|Q02413|DSG1_HUMAN Desmoglein-1 OS=Homo sapiens GN=DSG1 PE=1 SV=2	1	3	3	3	2	2	2	2	2	1	1	1	2	0	1	3	2	2	2	2	2	1	1	1	2	0	1	3	2	2	2	2	2	1	1	1	2	0	1	3	3.9	3.9
Q02790;F5H1U3;H0YFG2	Q02790	9;3;1	9;3;1	9;3;1	Peptidyl-prolyl cis-trans isomerase FKBP4;Peptidyl-prolyl cis-trans isomerase FKBP4, N-terminally processed	FKBP4	sp|Q02790|FKBP4_HUMAN Peptidyl-prolyl cis-trans isomerase FKBP4 OS=Homo sapiens GN=FKBP4 PE=1 SV=3	3	9	9	9	8	8	8	6	9	7	7	8	9	7	8	7	8	8	8	6	9	7	7	8	9	7	8	7	8	8	8	6	9	7	7	8	9	7	8	7	26.8	26.8
Q02878;F8VZ45;U3KQR5;F8VR69;F8VZA3;F8VWR1;F8VU16	Q02878	15;4;4;2;2;2;2	15;4;4;2;2;2;2	15;4;4;2;2;2;2	60S ribosomal protein L6	RPL6	sp|Q02878|RL6_HUMAN 60S ribosomal protein L6 OS=Homo sapiens GN=RPL6 PE=1 SV=3	7	15	15	15	15	15	15	15	15	14	15	15	13	15	14	15	15	15	15	15	15	14	15	15	13	15	14	15	15	15	15	15	15	14	15	15	13	15	14	15	44.8	44.8
Q03111	Q03111	7	7	7	Protein ENL	MLLT1	sp|Q03111|ENL_HUMAN Protein ENL OS=Homo sapiens GN=MLLT1 PE=1 SV=2	1	7	7	7	7	7	5	7	6	7	6	7	3	4	5	7	7	7	5	7	6	7	6	7	3	4	5	7	7	7	5	7	6	7	6	7	3	4	5	7	15.6	15.6
Q04760	Q04760	5	5	5	Lactoylglutathione lyase	GLO1	sp|Q04760|LGUL_HUMAN Lactoylglutathione lyase OS=Homo sapiens GN=GLO1 PE=1 SV=4	1	5	5	5	5	3	5	5	5	4	2	5	4	5	4	4	5	3	5	5	5	4	2	5	4	5	4	4	5	3	5	5	5	4	2	5	4	5	4	4	22.3	22.3
Q04917;A2IDB2	Q04917;A2IDB2	7;4	4;3	4;3	14-3-3 protein eta	YWHAH	sp|Q04917|1433F_HUMAN 14-3-3 protein eta OS=Homo sapiens GN=YWHAH PE=1 SV=4;tr|A2IDB2|A2IDB2_HUMAN 14-3-3 protein eta (Fragment) OS=Homo sapiens GN=YWHAH PE=1 SV=1	2	7	4	4	6	5	5	5	4	4	5	5	4	5	5	4	3	2	2	2	1	1	2	2	1	2	2	1	3	2	2	2	1	1	2	2	1	2	2	1	28.9	18.7
Q05519;Q5T760;Q5T757;B4DWT1;S4R3C4	Q05519;Q5T760;Q5T757	11;9;7;3;1	11;9;7;3;1	11;9;7;3;1	Serine/arginine-rich splicing factor 11	SRSF11	sp|Q05519|SRS11_HUMAN Serine/arginine-rich splicing factor 11 OS=Homo sapiens GN=SRSF11 PE=1 SV=1;tr|Q5T760|Q5T760_HUMAN Serine/arginine-rich-splicing factor 11 (Fragment) OS=Homo sapiens GN=SRSF11 PE=1 SV=1;tr|Q5T757|Q5T757_HUMAN Serine/arginine-rich-spli	5	11	11	11	10	10	11	10	11	10	11	11	11	11	11	10	10	10	11	10	11	10	11	11	11	11	11	10	10	10	11	10	11	10	11	11	11	11	11	10	27.3	27.3
Q06830;A0A0A0MSI0;A0A0A0MRQ5;H7C3T4;Q13162	Q06830;A0A0A0MSI0;A0A0A0MRQ5	10;9;6;2;2	10;9;6;2;2	9;8;5;2;2	Peroxiredoxin-1	PRDX1	sp|Q06830|PRDX1_HUMAN Peroxiredoxin-1 OS=Homo sapiens GN=PRDX1 PE=1 SV=1;tr|A0A0A0MSI0|A0A0A0MSI0_HUMAN Peroxiredoxin-1 (Fragment) OS=Homo sapiens GN=PRDX1 PE=1 SV=1;tr|A0A0A0MRQ5|A0A0A0MRQ5_HUMAN Peroxiredoxin-1 OS=Homo sapiens GN=PRDX1 PE=1 SV=1	5	10	10	9	9	8	9	7	8	7	9	10	9	6	9	8	9	8	9	7	8	7	9	10	9	6	9	8	8	7	8	6	7	6	8	9	8	5	8	7	62.8	62.8
Q07021;I3L3Q7;I3L3B0	Q07021;I3L3Q7;I3L3B0	2;1;1	2;1;1	2;1;1	Complement component 1 Q subcomponent-binding protein, mitochondrial	C1QBP	sp|Q07021|C1QBP_HUMAN Complement component 1 Q subcomponent-binding protein, mitochondrial OS=Homo sapiens GN=C1QBP PE=1 SV=1;tr|I3L3Q7|I3L3Q7_HUMAN Complement component 1 Q subcomponent-binding protein, mitochondrial (Fragment) OS=Homo sapiens GN=C1QBP PE	3	2	2	2	2	1	1	1	1	1	1	1	1	1	2	1	2	1	1	1	1	1	1	1	1	1	2	1	2	1	1	1	1	1	1	1	1	1	2	1	8.5	8.5
Q07812;K4JQN1	Q07812;K4JQN1	2;1	2;1	2;1	Apoptosis regulator BAX	BAX	sp|Q07812|BAX_HUMAN Apoptosis regulator BAX OS=Homo sapiens GN=BAX PE=1 SV=1;tr|K4JQN1|K4JQN1_HUMAN Apoptosis regulator BAX OS=Homo sapiens GN=BAX PE=1 SV=1	2	2	2	2	2	2	1	0	0	1	2	0	1	1	1	1	2	2	1	0	0	1	2	0	1	1	1	1	2	2	1	0	0	1	2	0	1	1	1	1	13.5	13.5
Q08170;A0A0D9SEM4	Q08170;A0A0D9SEM4	11;10	6;5	6;5	Serine/arginine-rich splicing factor 4	SRSF4	sp|Q08170|SRSF4_HUMAN Serine/arginine-rich splicing factor 4 OS=Homo sapiens GN=SRSF4 PE=1 SV=2;tr|A0A0D9SEM4|A0A0D9SEM4_HUMAN Serine/arginine-rich-splicing factor 4 (Fragment) OS=Homo sapiens GN=SRSF4 PE=1 SV=1	2	11	6	6	11	11	11	11	11	11	11	11	11	11	11	11	6	6	6	6	6	6	6	6	6	6	6	6	6	6	6	6	6	6	6	6	6	6	6	6	21.7	12.1
Q08554	Q08554	1	1	1	Desmocollin-1	DSC1	sp|Q08554|DSC1_HUMAN Desmocollin-1 OS=Homo sapiens GN=DSC1 PE=1 SV=2	1	1	1	1	0	0	0	1	0	1	0	0	0	0	0	1	0	0	0	1	0	1	0	0	0	0	0	1	0	0	0	1	0	1	0	0	0	0	0	1	1.6	1.6
Q08752	Q08752	2	2	2	Peptidyl-prolyl cis-trans isomerase D	PPID	sp|Q08752|PPID_HUMAN Peptidyl-prolyl cis-trans isomerase D OS=Homo sapiens GN=PPID PE=1 SV=3	1	2	2	2	1	2	2	1	1	1	0	1	1	1	2	1	1	2	2	1	1	1	0	1	1	1	2	1	1	2	2	1	1	1	0	1	1	1	2	1	4.9	4.9
Q08945;E9PMD4;A0A0U1RRK2;E9PPZ7	Q08945	27;10;5;3	27;10;5;3	27;10;5;3	FACT complex subunit SSRP1	SSRP1	sp|Q08945|SSRP1_HUMAN FACT complex subunit SSRP1 OS=Homo sapiens GN=SSRP1 PE=1 SV=1	4	27	27	27	25	24	25	23	26	26	24	26	24	25	25	24	25	24	25	23	26	26	24	26	24	25	25	24	25	24	25	23	26	26	24	26	24	25	25	24	50.5	50.5
Q08J23;A0A140T9Y7	Q08J23	18;6	18;6	18;6	tRNA (cytosine(34)-C(5))-methyltransferase	NSUN2	sp|Q08J23|NSUN2_HUMAN tRNA (cytosine(34)-C(5))-methyltransferase OS=Homo sapiens GN=NSUN2 PE=1 SV=2	2	18	18	18	11	13	13	12	11	11	13	12	11	12	12	12	11	13	13	12	11	11	13	12	11	12	12	12	11	13	13	12	11	11	13	12	11	12	12	12	32.7	32.7
Q09028;Q5JP02;H0YCT5;H0YF10;H0YDK2;H0YEU5;E9PNS2;E9PIC4;E9PNS6	Q09028;Q5JP02;H0YCT5;H0YF10;H0YDK2	5;3;3;3;3;2;1;1;1	2;0;0;0;0;0;1;1;1	2;0;0;0;0;0;1;1;1	Histone-binding protein RBBP4	RBBP4;RBBP7	sp|Q09028|RBBP4_HUMAN Histone-binding protein RBBP4 OS=Homo sapiens GN=RBBP4 PE=1 SV=3;tr|Q5JP02|Q5JP02_HUMAN Histone-binding protein RBBP7 (Fragment) OS=Homo sapiens GN=RBBP7 PE=1 SV=1;tr|H0YCT5|H0YCT5_HUMAN Histone-binding protein RBBP4 (Fragment) OS=Hom	9	5	2	2	5	4	3	2	4	2	2	2	2	1	4	3	2	1	1	1	2	1	1	1	1	1	2	1	2	1	1	1	2	1	1	1	1	1	2	1	11.8	6.4
Q0JRZ9	Q0JRZ9	1	1	1	F-BAR domain only protein 2	FCHO2	sp|Q0JRZ9|FCHO2_HUMAN F-BAR domain only protein 2 OS=Homo sapiens GN=FCHO2 PE=1 SV=2	1	1	1	1	1	1	0	0	0	1	1	1	0	1	0	0	1	1	0	0	0	1	1	1	0	1	0	0	1	1	0	0	0	1	1	1	0	1	0	0	1.9	1.9
Q12872;H0YFR9;F5H1A5	Q12872	6;2;1	6;2;1	6;2;1	Splicing factor, suppressor of white-apricot homolog	SFSWAP	sp|Q12872|SFSWA_HUMAN Splicing factor, suppressor of white-apricot homolog OS=Homo sapiens GN=SFSWAP PE=1 SV=3	3	6	6	6	3	0	2	2	2	2	5	6	3	1	2	3	3	0	2	2	2	2	5	6	3	1	2	3	3	0	2	2	2	2	5	6	3	1	2	3	7.4	7.4
Q12906;Q96SI9	Q12906;Q96SI9	2;1	2;1	2;1	Interleukin enhancer-binding factor 3;Spermatid perinuclear RNA-binding protein	ILF3;STRBP	sp|Q12906|ILF3_HUMAN Interleukin enhancer-binding factor 3 OS=Homo sapiens GN=ILF3 PE=1 SV=3;sp|Q96SI9|STRBP_HUMAN Spermatid perinuclear RNA-binding protein OS=Homo sapiens GN=STRBP PE=1 SV=1	2	2	2	2	1	0	1	0	0	0	0	0	0	0	0	0	1	0	1	0	0	0	0	0	0	0	0	0	1	0	1	0	0	0	0	0	0	0	0	0	2.2	2.2
Q12986	Q12986	6	6	6	Transcriptional repressor NF-X1	NFX1	sp|Q12986|NFX1_HUMAN Transcriptional repressor NF-X1 OS=Homo sapiens GN=NFX1 PE=1 SV=2	1	6	6	6	3	3	4	4	3	4	4	3	6	6	4	6	3	3	4	4	3	4	4	3	6	6	4	6	3	3	4	4	3	4	4	3	6	6	4	6	8.8	8.8
Q13045;J3KS54;J3KS39	Q13045	5;2;1	5;2;1	5;2;1	Protein flightless-1 homolog	FLII	sp|Q13045|FLII_HUMAN Protein flightless-1 homolog OS=Homo sapiens GN=FLII PE=1 SV=2	3	5	5	5	3	3	3	3	4	2	2	3	1	2	3	2	3	3	3	3	4	2	2	3	1	2	3	2	3	3	3	3	4	2	2	3	1	2	3	2	4.4	4.4
Q13111;K7EPA1	Q13111	4;1	4;1	4;1	Chromatin assembly factor 1 subunit A	CHAF1A	sp|Q13111|CAF1A_HUMAN Chromatin assembly factor 1 subunit A OS=Homo sapiens GN=CHAF1A PE=1 SV=2	2	4	4	4	3	3	3	1	3	2	2	1	0	1	2	2	3	3	3	1	3	2	2	1	0	1	2	2	3	3	3	1	3	2	2	1	0	1	2	2	5.4	5.4
Q13131;Q96E92;A0A087WXX9;P54646	Q13131;Q96E92;A0A087WXX9;P54646	3;2;2;2	3;2;2;2	3;2;2;2	5-AMP-activated protein kinase catalytic subunit alpha-1;5-AMP-activated protein kinase catalytic subunit alpha-2	PRKAA1;PRKAA2	sp|Q13131|AAPK1_HUMAN 5-AMP-activated protein kinase catalytic subunit alpha-1 OS=Homo sapiens GN=PRKAA1 PE=1 SV=4;tr|Q96E92|Q96E92_HUMAN 5-AMP-activated protein kinase catalytic subunit alpha-1 OS=Homo sapiens GN=PRKAA1 PE=1 SV=1;tr|A0A087WXX9|A0A087WXX	4	3	3	3	2	1	1	1	2	1	2	3	1	2	3	2	2	1	1	1	2	1	2	3	1	2	3	2	2	1	1	1	2	1	2	3	1	2	3	2	7.7	7.7
Q13243;B4DJK0;B4DUA4;G3V5K8	Q13243;B4DJK0;B4DUA4;G3V5K8	10;6;6;5	9;5;5;5	9;5;5;5	Serine/arginine-rich splicing factor 5	SRSF5	sp|Q13243|SRSF5_HUMAN Serine/arginine-rich splicing factor 5 OS=Homo sapiens GN=SRSF5 PE=1 SV=1;tr|B4DJK0|B4DJK0_HUMAN Serine/arginine-rich-splicing factor 5 OS=Homo sapiens GN=SRSF5 PE=1 SV=1;tr|B4DUA4|B4DUA4_HUMAN Serine/arginine-rich-splicing factor 5 O	4	10	9	9	10	10	10	9	10	10	10	10	10	10	8	9	9	9	9	8	9	9	9	9	9	9	7	8	9	9	9	8	9	9	9	9	9	9	7	8	30.5	27.2
Q13247;A0A0D9SGD2	Q13247	15;1	15;1	10;0	Serine/arginine-rich splicing factor 6	SRSF6	sp|Q13247|SRSF6_HUMAN Serine/arginine-rich splicing factor 6 OS=Homo sapiens GN=SRSF6 PE=1 SV=2	2	15	15	10	15	15	14	15	15	15	15	14	15	15	15	15	15	15	14	15	15	15	15	14	15	15	15	15	10	10	9	10	10	10	10	9	10	10	10	10	37.8	37.8
Q13283;E5RI46;E5RIF8;E5RH42;E5RJU8;E5RH00;E5RIZ6;D6R9X5;D6R9A4;D6RBM9;D6REX8;D6RBR0;D6RE13;D6RBW8;D6RGJ4;D6RAC7;D6RB17;Q9UN86	Q13283	7;3;3;3;3;2;2;1;1;1;1;1;1;1;1;1;1;1	7;3;3;3;3;2;2;1;1;1;1;1;1;1;1;1;1;1	7;3;3;3;3;2;2;1;1;1;1;1;1;1;1;1;1;1	Ras GTPase-activating protein-binding protein 1	G3BP1	sp|Q13283|G3BP1_HUMAN Ras GTPase-activating protein-binding protein 1 OS=Homo sapiens GN=G3BP1 PE=1 SV=1	18	7	7	7	7	7	6	7	6	6	7	7	6	7	7	7	7	7	6	7	6	6	7	7	6	7	7	7	7	7	6	7	6	6	7	7	6	7	7	7	19.5	19.5
Q13347;Q5TFK1	Q13347	9;2	9;2	9;2	Eukaryotic translation initiation factor 3 subunit I	EIF3I	sp|Q13347|EIF3I_HUMAN Eukaryotic translation initiation factor 3 subunit I OS=Homo sapiens GN=EIF3I PE=1 SV=1	2	9	9	9	4	3	5	4	5	4	4	5	6	4	4	3	4	3	5	4	5	4	4	5	6	4	4	3	4	3	5	4	5	4	4	5	6	4	4	3	40	40
Q13427;E9PG73;C9JM79;C9JN15;C9JT64;C9J679	Q13427;E9PG73;C9JM79;C9JN15	16;14;11;9;2;2	16;14;11;9;2;2	16;14;11;9;2;2	Peptidyl-prolyl cis-trans isomerase G;Peptidyl-prolyl cis-trans isomerase	PPIG	sp|Q13427|PPIG_HUMAN Peptidyl-prolyl cis-trans isomerase G OS=Homo sapiens GN=PPIG PE=1 SV=2;tr|E9PG73|E9PG73_HUMAN Peptidyl-prolyl cis-trans isomerase G OS=Homo sapiens GN=PPIG PE=1 SV=1;tr|C9JM79|C9JM79_HUMAN Peptidyl-prolyl cis-trans isomerase G (Fragme	6	16	16	16	13	14	13	13	14	14	15	15	15	15	14	15	13	14	13	13	14	14	15	15	15	15	14	15	13	14	13	13	14	14	15	15	15	15	14	15	24.1	24.1
Q13428;J3KQ96	Q13428;J3KQ96	43;39	43;39	5;1	Treacle protein	TCOF1	sp|Q13428|TCOF_HUMAN Treacle protein OS=Homo sapiens GN=TCOF1 PE=1 SV=3;tr|J3KQ96|J3KQ96_HUMAN Treacle protein (Fragment) OS=Homo sapiens GN=TCOF1 PE=1 SV=1	2	43	43	5	38	38	39	37	40	38	35	39	34	38	36	34	38	38	39	37	40	38	35	39	34	38	36	34	5	5	5	5	5	5	5	5	4	5	4	4	29.2	29.2
Q13442;F8WBW6	Q13442	6;1	6;1	6;1	28 kDa heat- and acid-stable phosphoprotein	PDAP1	sp|Q13442|HAP28_HUMAN 28 kDa heat- and acid-stable phosphoprotein OS=Homo sapiens GN=PDAP1 PE=1 SV=1	2	6	6	6	3	5	4	6	5	6	6	6	6	5	5	5	3	5	4	6	5	6	6	6	6	5	5	5	3	5	4	6	5	6	6	6	6	5	5	5	27.1	27.1
Q13464;A0A0U1RQV4	Q13464;A0A0U1RQV4	8;7	8;7	7;6	Rho-associated protein kinase 1	ROCK1	sp|Q13464|ROCK1_HUMAN Rho-associated protein kinase 1 OS=Homo sapiens GN=ROCK1 PE=1 SV=1;tr|A0A0U1RQV4|A0A0U1RQV4_HUMAN Rho-associated protein kinase 1 OS=Homo sapiens GN=ROCK1 PE=1 SV=1	2	8	8	7	5	4	2	5	5	3	4	3	3	8	4	8	5	4	2	5	5	3	4	3	3	8	4	8	4	4	2	5	4	3	4	3	3	7	4	7	7.1	7.1
Q13523;H0YDJ3	Q13523;H0YDJ3	9;6	9;6	9;6	Serine/threonine-protein kinase PRP4 homolog	PRPF4B	sp|Q13523|PRP4B_HUMAN Serine/threonine-protein kinase PRP4 homolog OS=Homo sapiens GN=PRPF4B PE=1 SV=3;tr|H0YDJ3|H0YDJ3_HUMAN Serine/threonine-protein kinase PRP4 homolog (Fragment) OS=Homo sapiens GN=PRPF4B PE=1 SV=1	2	9	9	9	6	5	7	7	7	7	7	8	8	6	7	8	6	5	7	7	7	7	7	8	8	6	7	8	6	5	7	7	7	7	7	8	8	6	7	8	10	10
Q13526;K7EN45;K7EMU7	Q13526;K7EN45;K7EMU7	2;1;1	2;1;1	2;1;1	Peptidyl-prolyl cis-trans isomerase NIMA-interacting 1	PIN1	sp|Q13526|PIN1_HUMAN Peptidyl-prolyl cis-trans isomerase NIMA-interacting 1 OS=Homo sapiens GN=PIN1 PE=1 SV=1;tr|K7EN45|K7EN45_HUMAN Peptidylprolyl isomerase (Fragment) OS=Homo sapiens GN=PIN1 PE=1 SV=1;tr|K7EMU7|K7EMU7_HUMAN Peptidylprolyl isomerase OS=Ho	3	2	2	2	1	1	1	1	2	1	1	2	1	2	2	2	1	1	1	1	2	1	1	2	1	2	2	2	1	1	1	1	2	1	1	2	1	2	2	2	20.9	20.9
Q13546	Q13546	2	2	2	Receptor-interacting serine/threonine-protein kinase 1	RIPK1	sp|Q13546|RIPK1_HUMAN Receptor-interacting serine/threonine-protein kinase 1 OS=Homo sapiens GN=RIPK1 PE=1 SV=3	1	2	2	2	0	1	1	0	2	0	2	2	2	1	2	1	0	1	1	0	2	0	2	2	2	1	2	1	0	1	1	0	2	0	2	2	2	1	2	1	3	3
Q13572;G3V588;G3V5A3;G3V4M9;G3V3C0	Q13572;G3V588;G3V5A3;G3V4M9	8;5;4;4;3	8;5;4;4;3	8;5;4;4;3	Inositol-tetrakisphosphate 1-kinase	ITPK1	sp|Q13572|ITPK1_HUMAN Inositol-tetrakisphosphate 1-kinase OS=Homo sapiens GN=ITPK1 PE=1 SV=2;tr|G3V588|G3V588_HUMAN Inositol-tetrakisphosphate 1-kinase (Fragment) OS=Homo sapiens GN=ITPK1 PE=1 SV=1;tr|G3V5A3|G3V5A3_HUMAN Inositol-tetrakisphosphate 1-kinase	5	8	8	8	4	3	4	6	5	8	6	4	4	4	4	3	4	3	4	6	5	8	6	4	4	4	4	3	4	3	4	6	5	8	6	4	4	4	4	3	26.6	26.6
Q13595;F8WEH2	Q13595	8;1	7;1	7;1	Transformer-2 protein homolog alpha	TRA2A	sp|Q13595|TRA2A_HUMAN Transformer-2 protein homolog alpha OS=Homo sapiens GN=TRA2A PE=1 SV=1	2	8	7	7	8	8	8	8	8	7	8	8	8	8	8	8	7	7	7	7	7	6	7	7	7	7	7	7	7	7	7	7	7	6	7	7	7	7	7	7	31.9	28.7
Q13596;H0YK42	Q13596;H0YK42	10;9	8;7	8;7	Sorting nexin-1	SNX1	sp|Q13596|SNX1_HUMAN Sorting nexin-1 OS=Homo sapiens GN=SNX1 PE=1 SV=3;tr|H0YK42|H0YK42_HUMAN Sorting nexin-1 OS=Homo sapiens GN=SNX1 PE=1 SV=1	2	10	8	8	8	7	7	8	5	6	5	7	7	6	5	8	6	5	5	6	3	4	4	5	5	4	3	6	6	5	5	6	3	4	4	5	5	4	3	6	22.8	18.8
Q13813;A0A0D9SF54;A0A0D9SGF6;A0A0D9SFF6	Q13813;A0A0D9SF54;A0A0D9SGF6	23;22;22;1	23;22;22;1	23;22;22;1	Spectrin alpha chain, non-erythrocytic 1	SPTAN1	sp|Q13813|SPTN1_HUMAN Spectrin alpha chain, non-erythrocytic 1 OS=Homo sapiens GN=SPTAN1 PE=1 SV=3;tr|A0A0D9SF54|A0A0D9SF54_HUMAN Spectrin alpha chain, non-erythrocytic 1 OS=Homo sapiens GN=SPTAN1 PE=1 SV=1;tr|A0A0D9SGF6|A0A0D9SGF6_HUMAN Spectrin alpha cha	4	23	23	23	12	13	13	11	14	10	13	9	6	12	14	12	12	13	13	11	14	10	13	9	6	12	14	12	12	13	13	11	14	10	13	9	6	12	14	12	13.2	13.2
Q13838;F6S4E6;A0A0A0MT12;F6TRA5;F6WLT2;A0A0G2JJZ9;Q5STU3;O00148;A0A140T9L4;A0A140T973;A0A140T9K1;A0A140T9X9;K7EPJ3;A0A140T996;F6UJC5;A0A140TA18;A0A140T9X3;K7ENP6;A0A0G2JHN7;K7EL56;K7EIL8;F6U6E2;K7EN69;F6S2B7;F6SXL5;F6QYI9;A0A0G2JJL7;H0Y400;F6R6M7;K7EQN7	Q13838;F6S4E6;A0A0A0MT12;F6TRA5;F6WLT2;A0A0G2JJZ9;Q5STU3;O00148	7;5;5;5;5;5;5;5;3;3;3;3;3;3;3;3;3;2;2;2;2;2;2;2;2;2;2;2;2;2	7;5;5;5;5;5;5;5;3;3;3;3;3;3;3;3;3;2;2;2;2;2;2;2;2;2;2;2;2;2	7;5;5;5;5;5;5;5;3;3;3;3;3;3;3;3;3;2;2;2;2;2;2;2;2;2;2;2;2;2	Spliceosome RNA helicase DDX39B;ATP-dependent RNA helicase DDX39A	DDX39B;DDX39A	sp|Q13838|DX39B_HUMAN Spliceosome RNA helicase DDX39B OS=Homo sapiens GN=DDX39B PE=1 SV=1;tr|F6S4E6|F6S4E6_HUMAN Spliceosome RNA helicase DDX39B (Fragment) OS=Homo sapiens GN=DDX39B PE=1 SV=1;tr|A0A0A0MT12|A0A0A0MT12_HUMAN Spliceosome RNA helicase DDX39B (	30	7	7	7	4	5	3	2	3	2	4	4	5	3	3	4	4	5	3	2	3	2	4	4	5	3	3	4	4	5	3	2	3	2	4	4	5	3	3	4	21.7	21.7
Q9BVA1;Q13885	Q9BVA1;Q13885	13;13	1;1	1;1	Tubulin beta-2B chain;Tubulin beta-2A chain	TUBB2B;TUBB2A	sp|Q9BVA1|TBB2B_HUMAN Tubulin beta-2B chain OS=Homo sapiens GN=TUBB2B PE=1 SV=1;sp|Q13885|TBB2A_HUMAN Tubulin beta-2A chain OS=Homo sapiens GN=TUBB2A PE=1 SV=1	2	13	1	1	10	9	9	10	10	9	9	9	9	9	9	10	1	0	0	1	0	0	1	0	0	0	0	1	1	0	0	1	0	0	1	0	0	0	0	1	40.9	6.1
Q14137;A0A075B729	Q14137	15;6	15;6	15;6	Ribosome biogenesis protein BOP1	BOP1	sp|Q14137|BOP1_HUMAN Ribosome biogenesis protein BOP1 OS=Homo sapiens GN=BOP1 PE=1 SV=2	2	15	15	15	13	12	14	13	14	13	11	12	10	13	11	12	13	12	14	13	14	13	11	12	10	13	11	12	13	12	14	13	14	13	11	12	10	13	11	12	29.1	29.1
Q14151;K7ERX3;K7EQU4	Q14151	31;3;2	31;3;2	17;3;2	Scaffold attachment factor B2	SAFB2	sp|Q14151|SAFB2_HUMAN Scaffold attachment factor B2 OS=Homo sapiens GN=SAFB2 PE=1 SV=1	3	31	31	17	31	30	29	30	29	30	27	27	29	29	31	27	31	30	29	30	29	30	27	27	29	29	31	27	17	17	15	17	17	16	13	14	16	16	17	14	36.7	36.7
Q14152	Q14152	60	60	60	Eukaryotic translation initiation factor 3 subunit A	EIF3A	sp|Q14152|EIF3A_HUMAN Eukaryotic translation initiation factor 3 subunit A OS=Homo sapiens GN=EIF3A PE=1 SV=1	1	60	60	60	54	55	52	51	53	55	49	49	46	51	53	53	54	55	52	51	53	55	49	49	46	51	53	53	54	55	52	51	53	55	49	49	46	51	53	53	42.1	42.1
Q14247;H0YCD9;H0YEV2	Q14247	12;3;2	12;3;2	12;3;2	Src substrate cortactin	CTTN	sp|Q14247|SRC8_HUMAN Src substrate cortactin OS=Homo sapiens GN=CTTN PE=1 SV=2	3	12	12	12	10	9	7	7	10	8	7	9	9	8	8	7	10	9	7	7	10	8	7	9	9	8	8	7	10	9	7	7	10	8	7	9	9	8	8	7	25.1	25.1
Q14498;G3XAC6;H0Y4X3;A0A0U1RQH7;A0A0U1RQW2;Q5QP23;Q5QP22;F8WF24;F2Z2Z5;A8MYG5;Q86U06;F2Z3E6;F8WF73;G3V5Z6;H0YJJ3;G3XAP0;A0A087X122;H0Y6I9;G3V546	Q14498;G3XAC6;H0Y4X3;A0A0U1RQH7	20;15;13;11;7;7;6;3;3;3;3;2;2;2;2;2;1;1;1	20;15;13;11;7;7;6;3;3;3;3;2;2;2;2;2;1;1;1	20;15;13;11;7;7;6;3;3;3;3;2;2;2;2;2;1;1;1	RNA-binding protein 39	RBM39	sp|Q14498|RBM39_HUMAN RNA-binding protein 39 OS=Homo sapiens GN=RBM39 PE=1 SV=2;tr|G3XAC6|G3XAC6_HUMAN RNA-binding protein 39 OS=Homo sapiens GN=RBM39 PE=1 SV=1;tr|H0Y4X3|H0Y4X3_HUMAN RNA-binding protein 39 (Fragment) OS=Homo sapiens GN=RBM39 PE=1 SV=7;tr|	19	20	20	20	17	18	17	19	16	17	20	20	20	18	19	20	17	18	17	19	16	17	20	20	20	18	19	20	17	18	17	19	16	17	20	20	20	18	19	20	47.5	47.5
Q14532;CON__Q14532	Q14532;CON__Q14532	6;5	1;1	1;1	Keratin, type I cuticular Ha2	KRT32	sp|Q14532|K1H2_HUMAN Keratin, type I cuticular Ha2 OS=Homo sapiens GN=KRT32 PE=2 SV=3;	2	6	1	1	1	6	1	1	1	1	1	1	1	1	1	1	0	1	0	0	0	0	0	0	0	0	0	0	0	1	0	0	0	0	0	0	0	0	0	0	12.5	2
Q14566	Q14566	5	5	5	DNA replication licensing factor MCM6	MCM6	sp|Q14566|MCM6_HUMAN DNA replication licensing factor MCM6 OS=Homo sapiens GN=MCM6 PE=1 SV=1	1	5	5	5	2	3	5	3	3	3	3	4	2	4	5	3	2	3	5	3	3	3	3	4	2	4	5	3	2	3	5	3	3	3	3	4	2	4	5	3	8.5	8.5
Q14739;C9JXK0	Q14739;C9JXK0	4;3	4;3	4;3	Lamin-B receptor	LBR	sp|Q14739|LBR_HUMAN Lamin-B receptor OS=Homo sapiens GN=LBR PE=1 SV=2;tr|C9JXK0|C9JXK0_HUMAN Lamin-B receptor (Fragment) OS=Homo sapiens GN=LBR PE=1 SV=1	2	4	4	4	2	3	2	3	3	3	4	3	2	4	3	3	2	3	2	3	3	3	4	3	2	4	3	3	2	3	2	3	3	3	4	3	2	4	3	3	6.5	6.5
Q14964;C9JB90;C9JU14;J3KR73;Q9NRW1;P20340;Q96DA2	Q14964;C9JB90;C9JU14;J3KR73;Q9NRW1;P20340;Q96DA2	2;1;1;1;1;1;1	2;1;1;1;1;1;1	2;1;1;1;1;1;1	Ras-related protein Rab-39A;Ras-related protein Rab-6B;Ras-related protein Rab-6A;Ras-related protein Rab-39B	RAB39A;RAB6B;RAB6A;RAB39B	sp|Q14964|RB39A_HUMAN Ras-related protein Rab-39A OS=Homo sapiens GN=RAB39A PE=1 SV=2;tr|C9JB90|C9JB90_HUMAN Ras-related protein Rab-6B (Fragment) OS=Homo sapiens GN=RAB6B PE=4 SV=1;tr|C9JU14|C9JU14_HUMAN Ras-related protein Rab-6B (Fragment) OS=Homo sapie	7	2	2	2	1	1	2	1	1	2	2	1	1	1	1	1	1	1	2	1	1	2	2	1	1	1	1	1	1	1	2	1	1	2	2	1	1	1	1	1	10.1	10.1
Q14974;J3KTM9;J3QR48;J3QKQ5;J3QRG4	Q14974;J3KTM9	11;9;2;2;1	11;9;2;2;1	11;9;2;2;1	Importin subunit beta-1	KPNB1	sp|Q14974|IMB1_HUMAN Importin subunit beta-1 OS=Homo sapiens GN=KPNB1 PE=1 SV=2;tr|J3KTM9|J3KTM9_HUMAN Importin subunit beta-1 (Fragment) OS=Homo sapiens GN=KPNB1 PE=1 SV=1	5	11	11	11	9	8	9	9	9	9	10	9	9	8	6	9	9	8	9	9	9	9	10	9	9	8	6	9	9	8	9	9	9	9	10	9	9	8	6	9	18.2	18.2
Q15021;E7EN77	Q15021;E7EN77	9;5	9;5	9;5	Condensin complex subunit 1	NCAPD2	sp|Q15021|CND1_HUMAN Condensin complex subunit 1 OS=Homo sapiens GN=NCAPD2 PE=1 SV=3;tr|E7EN77|E7EN77_HUMAN Condensin complex subunit 1 (Fragment) OS=Homo sapiens GN=NCAPD2 PE=1 SV=2	2	9	9	9	7	8	5	6	5	6	5	4	3	4	6	6	7	8	5	6	5	6	5	4	3	4	6	6	7	8	5	6	5	6	5	4	3	4	6	6	9.6	9.6
Q15056	Q15056	3	3	3	Eukaryotic translation initiation factor 4H	EIF4H	sp|Q15056|IF4H_HUMAN Eukaryotic translation initiation factor 4H OS=Homo sapiens GN=EIF4H PE=1 SV=5	1	3	3	3	2	2	3	3	3	3	2	3	3	3	3	2	2	2	3	3	3	3	2	3	3	3	3	2	2	2	3	3	3	3	2	3	3	3	3	2	19.4	19.4
Q15059;A9J571	Q15059	23;3	16;3	16;3	Bromodomain-containing protein 3	BRD3	sp|Q15059|BRD3_HUMAN Bromodomain-containing protein 3 OS=Homo sapiens GN=BRD3 PE=1 SV=1	2	23	16	16	18	20	17	16	17	18	19	20	18	18	18	18	11	13	11	10	10	11	13	14	12	12	12	12	11	13	11	10	10	11	13	14	12	12	12	12	37.5	29.8
Q15084	Q15084	2	2	2	Protein disulfide-isomerase A6	PDIA6	sp|Q15084|PDIA6_HUMAN Protein disulfide-isomerase A6 OS=Homo sapiens GN=PDIA6 PE=1 SV=1	1	2	2	2	1	1	0	0	0	0	1	2	1	1	0	0	1	1	0	0	0	0	1	2	1	1	0	0	1	1	0	0	0	0	1	2	1	1	0	0	7	7
Q15181;Q5SQT6	Q15181;Q5SQT6	10;5	10;5	10;5	Inorganic pyrophosphatase	PPA1	sp|Q15181|IPYR_HUMAN Inorganic pyrophosphatase OS=Homo sapiens GN=PPA1 PE=1 SV=2;tr|Q5SQT6|Q5SQT6_HUMAN Inorganic pyrophosphatase OS=Homo sapiens GN=PPA1 PE=1 SV=1	2	10	10	10	7	8	8	7	9	8	8	8	7	8	8	9	7	8	8	7	9	8	8	8	7	8	8	9	7	8	8	7	9	8	8	8	7	8	8	9	50.2	50.2
Q15233;H7C367;C9JYS8;C9IZL7	Q15233;H7C367;C9JYS8	5;3;3;1	5;3;3;1	5;3;3;1	Non-POU domain-containing octamer-binding protein	NONO	sp|Q15233|NONO_HUMAN Non-POU domain-containing octamer-binding protein OS=Homo sapiens GN=NONO PE=1 SV=4;tr|H7C367|H7C367_HUMAN Non-POU domain-containing octamer-binding protein (Fragment) OS=Homo sapiens GN=NONO PE=1 SV=7;tr|C9JYS8|C9JYS8_HUMAN Non-POU do	4	5	5	5	5	2	3	2	2	2	4	3	3	3	3	3	5	2	3	2	2	2	4	3	3	3	3	3	5	2	3	2	2	2	4	3	3	3	3	3	15.3	15.3
Q15365	Q15365	2	1	1	Poly(rC)-binding protein 1	PCBP1	sp|Q15365|PCBP1_HUMAN Poly(rC)-binding protein 1 OS=Homo sapiens GN=PCBP1 PE=1 SV=2	1	2	1	1	2	2	2	1	1	2	2	1	2	1	2	1	1	1	1	0	0	1	1	0	1	0	1	0	1	1	1	0	0	1	1	0	1	0	1	0	7	3.9
Q15424;K7EII0;K7ES42	Q15424	31;5;3	17;3;3	17;3;3	Scaffold attachment factor B1	SAFB	sp|Q15424|SAFB1_HUMAN Scaffold attachment factor B1 OS=Homo sapiens GN=SAFB PE=1 SV=4	3	31	17	17	30	28	30	30	29	30	31	28	29	30	30	30	16	15	16	17	17	16	17	15	16	17	16	17	16	15	16	17	17	16	17	15	16	17	16	17	38.4	23.5
Q15545	Q15545	1	1	1	Transcription initiation factor TFIID subunit 7	TAF7	sp|Q15545|TAF7_HUMAN Transcription initiation factor TFIID subunit 7 OS=Homo sapiens GN=TAF7 PE=1 SV=1	1	1	1	1	1	1	1	1	1	1	1	1	1	1	1	1	1	1	1	1	1	1	1	1	1	1	1	1	1	1	1	1	1	1	1	1	1	1	1	1	2.3	2.3
Q15650	Q15650	1	1	1	Activating signal cointegrator 1	TRIP4	sp|Q15650|TRIP4_HUMAN Activating signal cointegrator 1 OS=Homo sapiens GN=TRIP4 PE=1 SV=4	1	1	1	1	0	0	1	0	0	0	0	1	0	0	1	0	0	0	1	0	0	0	0	1	0	0	1	0	0	0	1	0	0	0	0	1	0	0	1	0	2.4	2.4
Q15695;Q15696	Q15695;Q15696	2;2	2;2	2;2	U2 small nuclear ribonucleoprotein auxiliary factor 35 kDa subunit-related protein 1;U2 small nuclear ribonucleoprotein auxiliary factor 35 kDa subunit-related protein 2	ZRSR1;ZRSR2	sp|Q15695|U2AFL_HUMAN U2 small nuclear ribonucleoprotein auxiliary factor 35 kDa subunit-related protein 1 OS=Homo sapiens GN=ZRSR1 PE=2 SV=2;sp|Q15696|U2AFM_HUMAN U2 small nuclear ribonucleoprotein auxiliary factor 35 kDa subunit-related protein 2 OS=Homo	2	2	2	2	0	0	0	0	0	0	1	1	1	1	0	0	0	0	0	0	0	0	1	1	1	1	0	0	0	0	0	0	0	0	1	1	1	1	0	0	4.2	4.2
Q16204	Q16204	4	4	4	Coiled-coil domain-containing protein 6	CCDC6	sp|Q16204|CCDC6_HUMAN Coiled-coil domain-containing protein 6 OS=Homo sapiens GN=CCDC6 PE=1 SV=2	1	4	4	4	2	1	2	3	1	4	1	1	2	1	1	1	2	1	2	3	1	4	1	1	2	1	1	1	2	1	2	3	1	4	1	1	2	1	1	1	10.5	10.5
Q16543;K7EQA9;K7EL68;K7EIU0;K7EKQ2	Q16543;K7EQA9;K7EL68	5;4;3;2;2	5;4;3;2;2	5;4;3;2;2	Hsp90 co-chaperone Cdc37;Hsp90 co-chaperone Cdc37, N-terminally processed	CDC37	sp|Q16543|CDC37_HUMAN Hsp90 co-chaperone Cdc37 OS=Homo sapiens GN=CDC37 PE=1 SV=1;tr|K7EQA9|K7EQA9_HUMAN Hsp90 co-chaperone Cdc37 (Fragment) OS=Homo sapiens GN=CDC37 PE=1 SV=1;tr|K7EL68|K7EL68_HUMAN Hsp90 co-chaperone Cdc37 (Fragment) OS=Homo sapiens GN=CD	5	5	5	5	5	5	5	4	4	4	3	3	4	3	4	3	5	5	5	4	4	4	3	3	4	3	4	3	5	5	5	4	4	4	3	3	4	3	4	3	19	19
Q16629;A0A0B4J1Z1;C9JAB2;F8WEA1;H7BZZ6	Q16629;A0A0B4J1Z1;C9JAB2	10;9;9;4;1	10;9;9;4;1	9;8;8;4;1	Serine/arginine-rich splicing factor 7	SRSF7	sp|Q16629|SRSF7_HUMAN Serine/arginine-rich splicing factor 7 OS=Homo sapiens GN=SRSF7 PE=1 SV=1;tr|A0A0B4J1Z1|A0A0B4J1Z1_HUMAN Serine/arginine-rich-splicing factor 7 OS=Homo sapiens GN=SRSF7 PE=1 SV=1;tr|C9JAB2|C9JAB2_HUMAN Serine/arginine-rich-splicing fa	5	10	10	9	10	9	10	9	10	10	10	9	10	10	10	10	10	9	10	9	10	10	10	9	10	10	10	10	9	8	9	8	9	9	9	8	9	9	9	9	38.2	38.2
Q1ED39;H3BPL4	Q1ED39	3;1	3;1	2;1	Lysine-rich nucleolar protein 1	KNOP1	sp|Q1ED39|KNOP1_HUMAN Lysine-rich nucleolar protein 1 OS=Homo sapiens GN=KNOP1 PE=1 SV=1	2	3	3	2	2	1	1	2	3	2	2	3	2	0	2	2	2	1	1	2	3	2	2	3	2	0	2	2	1	1	1	1	2	2	1	2	1	0	2	1	9.6	9.6
Q32Q12;P22392	Q32Q12;P22392	9;8	9;8	1;1	Nucleoside diphosphate kinase;Nucleoside diphosphate kinase B	NME1-NME2;NME2	tr|Q32Q12|Q32Q12_HUMAN Nucleoside diphosphate kinase OS=Homo sapiens GN=NME1-NME2 PE=1 SV=1;sp|P22392|NDKB_HUMAN Nucleoside diphosphate kinase B OS=Homo sapiens GN=NME2 PE=1 SV=1	2	9	9	1	9	8	8	8	8	8	9	9	9	9	7	8	9	8	8	8	8	8	9	9	9	9	7	8	1	1	1	0	1	1	1	1	1	1	0	1	47.9	47.9
Q4KMP7	Q4KMP7	2	2	2	TBC1 domain family member 10B	TBC1D10B	sp|Q4KMP7|TB10B_HUMAN TBC1 domain family member 10B OS=Homo sapiens GN=TBC1D10B PE=1 SV=3	1	2	2	2	2	2	2	2	2	2	2	2	2	1	2	2	2	2	2	2	2	2	2	2	2	1	2	2	2	2	2	2	2	2	2	2	2	1	2	2	4	4
Q53F19;K7ELP6	Q53F19	8;1	8;1	8;1	Uncharacterized protein C17orf85	C17orf85	sp|Q53F19|NCBP3_HUMAN Nuclear cap-binding protein subunit 3 OS=Homo sapiens GN=NCBP3 PE=1 SV=2	2	8	8	8	7	7	5	5	7	7	3	6	1	5	4	7	7	7	5	5	7	7	3	6	1	5	4	7	7	7	5	5	7	7	3	6	1	5	4	7	15.6	15.6
Q53RE8	Q53RE8	3	3	3	Ankyrin repeat domain-containing protein 39	ANKRD39	sp|Q53RE8|ANR39_HUMAN Ankyrin repeat domain-containing protein 39 OS=Homo sapiens GN=ANKRD39 PE=1 SV=1	1	3	3	3	2	1	1	1	1	0	1	3	1	0	1	1	2	1	1	1	1	0	1	3	1	0	1	1	2	1	1	1	1	0	1	3	1	0	1	1	22.4	22.4
Q562R1	Q562R1	5	1	1	Beta-actin-like protein 2	ACTBL2	sp|Q562R1|ACTBL_HUMAN Beta-actin-like protein 2 OS=Homo sapiens GN=ACTBL2 PE=1 SV=2	1	5	1	1	5	4	4	4	4	3	4	4	4	4	4	2	1	0	0	0	0	0	0	0	0	0	0	0	1	0	0	0	0	0	0	0	0	0	0	0	16	4.8
Q58FF6	Q58FF6	6	2	2	Putative heat shock protein HSP 90-beta 4	HSP90AB4P	sp|Q58FF6|H90B4_HUMAN Putative heat shock protein HSP 90-beta 4 OS=Homo sapiens GN=HSP90AB4P PE=5 SV=1	1	6	2	2	6	6	6	6	5	5	5	5	5	5	6	5	2	2	2	2	1	1	1	1	1	1	2	1	2	2	2	2	1	1	1	1	1	1	2	1	12.5	6.1
Q58FF8	Q58FF8	7	1	1	Putative heat shock protein HSP 90-beta 2	HSP90AB2P	sp|Q58FF8|H90B2_HUMAN Putative heat shock protein HSP 90-beta 2 OS=Homo sapiens GN=HSP90AB2P PE=1 SV=2	1	7	1	1	7	7	7	7	6	7	6	6	7	6	6	6	1	1	1	1	1	1	1	1	1	1	1	1	1	1	1	1	1	1	1	1	1	1	1	1	20.5	3.9
Q5H907;Q5H909;Q9UNF1	Q5H907;Q5H909;Q9UNF1	1;1;1	1;1;1	1;1;1	Melanoma-associated antigen D2	MAGED2	tr|Q5H907|Q5H907_HUMAN Melanoma antigen family D, 2, isoform CRA_d OS=Homo sapiens GN=MAGED2 PE=1 SV=1;tr|Q5H909|Q5H909_HUMAN Melanoma-associated antigen D2 OS=Homo sapiens GN=MAGED2 PE=1 SV=2;sp|Q9UNF1|MAGD2_HUMAN Melanoma-associated antigen D2 OS=Homo sa	3	1	1	1	1	1	1	1	1	1	1	1	1	1	1	1	1	1	1	1	1	1	1	1	1	1	1	1	1	1	1	1	1	1	1	1	1	1	1	1	4.2	4.2
Q5HYB6	Q5HYB6	21	21	0		DKFZp686J1372	tr|Q5HYB6|Q5HYB6_HUMAN Epididymis luminal protein 189 OS=Homo sapiens GN=DKFZp686J1372 PE=1 SV=1	1	21	21	0	17	17	19	19	16	19	16	20	16	18	18	17	17	17	19	19	16	19	16	20	16	18	18	17	0	0	0	0	0	0	0	0	0	0	0	0	64.2	64.2
Q5JXI8;Q13642;A0A0D9SFZ9;Q5JXH8;Q5JXH7;Q5JXI3;A0A0D9SFI6;A0A0D9SFB0;Q5JXH9;Q5JXI2;A0A0D9SGB2;Q5JXI0;A0A0D9SG53;A0A0D9SGD1;A0A0D9SEY7;A0A0D9SGC5	Q5JXI8;Q13642;A0A0D9SFZ9;Q5JXH8;Q5JXH7;Q5JXI3;A0A0D9SFI6;A0A0D9SFB0;Q5JXH9;Q5JXI2;A0A0D9SGB2;Q5JXI0	11;9;8;8;8;8;7;7;7;7;6;6;5;3;2;1	11;9;8;8;8;8;7;7;7;7;6;6;5;3;2;1	11;9;8;8;8;8;7;7;7;7;6;6;5;3;2;1	Four and a half LIM domains protein 1	FHL1	tr|Q5JXI8|Q5JXI8_HUMAN Four and a half LIM domains protein 1 (Fragment) OS=Homo sapiens GN=FHL1 PE=1 SV=1;sp|Q13642|FHL1_HUMAN Four and a half LIM domains protein 1 OS=Homo sapiens GN=FHL1 PE=1 SV=4;tr|A0A0D9SFZ9|A0A0D9SFZ9_HUMAN Four and a half LIM domain	16	11	11	11	9	10	10	10	8	9	10	9	10	9	11	11	9	10	10	10	8	9	10	9	10	9	11	11	9	10	10	10	8	9	10	9	10	9	11	11	50.2	50.2
Q5SXM2	Q5SXM2	14	14	14	snRNA-activating protein complex subunit 4	SNAPC4	sp|Q5SXM2|SNPC4_HUMAN snRNA-activating protein complex subunit 4 OS=Homo sapiens GN=SNAPC4 PE=1 SV=1	1	14	14	14	5	10	8	7	11	9	10	7	8	8	7	11	5	10	8	7	11	9	10	7	8	8	7	11	5	10	8	7	11	9	10	7	8	8	7	11	12.3	12.3
Q5T200;A0A087WX14	Q5T200	6;1	6;1	6;1	Zinc finger CCCH domain-containing protein 13	ZC3H13	sp|Q5T200|ZC3HD_HUMAN Zinc finger CCCH domain-containing protein 13 OS=Homo sapiens GN=ZC3H13 PE=1 SV=1	2	6	6	6	2	1	1	2	2	2	3	4	3	3	4	4	2	1	1	2	2	2	3	4	3	3	4	4	2	1	1	2	2	2	3	4	3	3	4	4	5	5
Q5T3I0;A0A0A0MRK1;E9PAV9;F8W895;E9PPY4;F2Z3C6	Q5T3I0;A0A0A0MRK1;E9PAV9;F8W895	12;10;10;7;2;2	12;10;10;7;2;2	12;10;10;7;2;2	G patch domain-containing protein 4	GPATCH4	sp|Q5T3I0|GPTC4_HUMAN G patch domain-containing protein 4 OS=Homo sapiens GN=GPATCH4 PE=1 SV=2;tr|A0A0A0MRK1|A0A0A0MRK1_HUMAN G patch domain-containing protein 4 OS=Homo sapiens GN=GPATCH4 PE=1 SV=1;tr|E9PAV9|E9PAV9_HUMAN G patch domain-containing protein	6	12	12	12	9	10	10	7	11	9	11	10	11	9	10	10	9	10	10	7	11	9	11	10	11	9	10	10	9	10	10	7	11	9	11	10	11	9	10	10	33.4	33.4
Q5T749	Q5T749	2	2	2	Keratinocyte proline-rich protein	KPRP	sp|Q5T749|KPRP_HUMAN Keratinocyte proline-rich protein OS=Homo sapiens GN=KPRP PE=1 SV=1	1	2	2	2	2	2	1	2	1	2	1	1	1	1	1	1	2	2	1	2	1	2	1	1	1	1	1	1	2	2	1	2	1	2	1	1	1	1	1	1	6	6
Q5T8P6;A0A087X0H9;E2PSN0;U3KPZ7;Q9P2N5	Q5T8P6;A0A087X0H9	23;22;6;1;1	23;22;6;1;1	23;22;6;1;1	RNA-binding protein 26	RBM26	sp|Q5T8P6|RBM26_HUMAN RNA-binding protein 26 OS=Homo sapiens GN=RBM26 PE=1 SV=3;tr|A0A087X0H9|A0A087X0H9_HUMAN RNA-binding protein 26 OS=Homo sapiens GN=RBM26 PE=1 SV=1	5	23	23	23	18	18	17	18	20	20	15	18	19	17	19	19	18	18	17	18	20	20	15	18	19	17	19	19	18	18	17	18	20	20	15	18	19	17	19	19	25.1	25.1
Q5TEC6;K7EMV3;K7EP01;B4DEB1;K7EK07;K7ES00;Q6NXT2;Q71DI3;Q16695;P84243;P68431	Q5TEC6;K7EMV3;K7EP01;B4DEB1;K7EK07;K7ES00;Q6NXT2;Q71DI3;Q16695;P84243;P68431	2;1;1;1;1;1;1;1;1;1;1	2;1;1;1;1;1;1;1;1;1;1	2;1;1;1;1;1;1;1;1;1;1	Histone H3;Histone H3.3C;Histone H3.2;Histone H3.1t;Histone H3.3;Histone H3.1	HIST2H3PS2;H3F3B;H3F3A;H3F3C;HIST2H3A;HIST3H3;HIST1H3A	tr|Q5TEC6|Q5TEC6_HUMAN Histone H3 OS=Homo sapiens GN=HIST2H3PS2 PE=1 SV=1;tr|K7EMV3|K7EMV3_HUMAN Histone H3 OS=Homo sapiens GN=H3F3B PE=1 SV=1;tr|K7EP01|K7EP01_HUMAN Histone H3.3 OS=Homo sapiens GN=H3F3B PE=1 SV=1;tr|B4DEB1|B4DEB1_HUMAN Histone H3 OS=Homo	11	2	2	2	2	2	2	0	0	0	0	1	2	1	0	1	2	2	2	0	0	0	0	1	2	1	0	1	2	2	2	0	0	0	0	1	2	1	0	1	13.2	13.2
Q5VTL8;A0A0A0MRN0	Q5VTL8;A0A0A0MRN0	14;8	14;8	14;8	Pre-mRNA-splicing factor 38B	PRPF38B	sp|Q5VTL8|PR38B_HUMAN Pre-mRNA-splicing factor 38B OS=Homo sapiens GN=PRPF38B PE=1 SV=1;tr|A0A0A0MRN0|A0A0A0MRN0_HUMAN PRP38 pre-mRNA processing factor 38 (Yeast) domain containing B, isoform CRA_b OS=Homo sapiens GN=PRPF38B PE=1 SV=1	2	14	14	14	13	14	13	13	12	12	13	11	13	13	13	14	13	14	13	13	12	12	13	11	13	13	13	14	13	14	13	13	12	12	13	11	13	13	13	14	32.2	32.2
Q68CQ4	Q68CQ4	2	2	2	Digestive organ expansion factor homolog	DIEXF	sp|Q68CQ4|DIEXF_HUMAN Digestive organ expansion factor homolog OS=Homo sapiens GN=DIEXF PE=1 SV=2	1	2	2	2	2	2	2	1	2	2	1	1	1	1	1	1	2	2	2	1	2	2	1	1	1	1	1	1	2	2	2	1	2	2	1	1	1	1	1	1	2.9	2.9
Q68E01	Q68E01	1	1	1	Integrator complex subunit 3	INTS3	sp|Q68E01|INT3_HUMAN Integrator complex subunit 3 OS=Homo sapiens GN=INTS3 PE=1 SV=1	1	1	1	1	1	1	1	1	0	0	0	0	1	0	1	0	1	1	1	1	0	0	0	0	1	0	1	0	1	1	1	1	0	0	0	0	1	0	1	0	2.7	2.7
Q6FI81;H3BTZ8;H3BQ23;H3BUG4;H3BV90;H3BT65	Q6FI81;H3BTZ8;H3BQ23;H3BUG4;H3BV90;H3BT65	2;1;1;1;1;1	2;1;1;1;1;1	2;1;1;1;1;1	Anamorsin	CIAPIN1	sp|Q6FI81|CPIN1_HUMAN Anamorsin OS=Homo sapiens GN=CIAPIN1 PE=1 SV=2;tr|H3BTZ8|H3BTZ8_HUMAN Anamorsin (Fragment) OS=Homo sapiens GN=CIAPIN1 PE=1 SV=1;tr|H3BQ23|H3BQ23_HUMAN Anamorsin (Fragment) OS=Homo sapiens GN=CIAPIN1 PE=1 SV=1;tr|H3BUG4|H3BUG4_HUMAN An	6	2	2	2	1	1	2	0	1	0	1	1	0	0	1	1	1	1	2	0	1	0	1	1	0	0	1	1	1	1	2	0	1	0	1	1	0	0	1	1	7.7	7.7
Q6NXE6;B4E1N1;F5GWV0;F5H4P3;H0YH65;F5H6J3;F5H7V0;F5GZP0;F5H3X1;H0YGL0;F5H052;H0YGQ5;F5H2X2;F5H2K4	Q6NXE6;B4E1N1;F5GWV0;F5H4P3	8;7;5;5;2;2;1;1;1;1;1;1;1;1	8;7;5;5;2;2;1;1;1;1;1;1;1;1	8;7;5;5;2;2;1;1;1;1;1;1;1;1	Armadillo repeat-containing protein 6	ARMC6	sp|Q6NXE6|ARMC6_HUMAN Armadillo repeat-containing protein 6 OS=Homo sapiens GN=ARMC6 PE=1 SV=2;tr|B4E1N1|B4E1N1_HUMAN Armadillo repeat-containing protein 6 OS=Homo sapiens GN=ARMC6 PE=1 SV=1;tr|F5GWV0|F5GWV0_HUMAN Armadillo repeat-containing protein 6 (Fra	14	8	8	8	4	4	8	6	5	5	6	6	6	6	5	5	4	4	8	6	5	5	6	6	6	6	5	5	4	4	8	6	5	5	6	6	6	6	5	5	18.6	18.6
Q6NYC1;B2WTI3;B2WTI4;K7EJU9	Q6NYC1;B2WTI3;B2WTI4;K7EJU9	11;10;10;10	11;10;10;10	11;10;10;10	Bifunctional arginine demethylase and lysyl-hydroxylase JMJD6	JMJD6	sp|Q6NYC1|JMJD6_HUMAN Bifunctional arginine demethylase and lysyl-hydroxylase JMJD6 OS=Homo sapiens GN=JMJD6 PE=1 SV=1;tr|B2WTI3|B2WTI3_HUMAN Bifunctional arginine demethylase and lysyl-hydroxylase JMJD6 OS=Homo sapiens GN=JMJD6 PE=1 SV=1;tr|B2WTI4|B2WTI4_	4	11	11	11	10	10	9	8	9	10	10	9	9	9	8	10	10	10	9	8	9	10	10	9	9	9	8	10	10	10	9	8	9	10	10	9	9	9	8	10	36.2	36.2
Q6P1N9;E5RG17;A0A0D9SGD3;H0YBX2;G5EA19;E5RGF2;U3KQS5;E5RID7;E5RG62;E5RK70;E5RI69;E5RJY6	Q6P1N9;E5RG17;A0A0D9SGD3;H0YBX2;G5EA19;E5RGF2;U3KQS5	8;7;6;5;5;5;5;2;2;2;1;1	8;7;6;5;5;5;5;2;2;2;1;1	8;7;6;5;5;5;5;2;2;2;1;1	Putative deoxyribonuclease TATDN1	TATDN1	sp|Q6P1N9|TATD1_HUMAN Putative deoxyribonuclease TATDN1 OS=Homo sapiens GN=TATDN1 PE=1 SV=2;tr|E5RG17|E5RG17_HUMAN Putative deoxyribonuclease TATDN1 (Fragment) OS=Homo sapiens GN=TATDN1 PE=1 SV=1;tr|A0A0D9SGD3|A0A0D9SGD3_HUMAN Putative deoxyribonuclease TA	12	8	8	8	7	7	8	7	6	5	7	7	6	7	7	6	7	7	8	7	6	5	7	7	6	7	7	6	7	7	8	7	6	5	7	7	6	7	7	6	32.3	32.3
Q6PD62	Q6PD62	2	2	2	RNA polymerase-associated protein CTR9 homolog	CTR9	sp|Q6PD62|CTR9_HUMAN RNA polymerase-associated protein CTR9 homolog OS=Homo sapiens GN=CTR9 PE=1 SV=1	1	2	2	2	1	0	0	0	2	1	2	2	0	0	2	2	1	0	0	0	2	1	2	2	0	0	2	2	1	0	0	0	2	1	2	2	0	0	2	2	2.3	2.3
Q6PKG0;H0YC33;E5RH50;A0A0B4J210	Q6PKG0;H0YC33;E5RH50;A0A0B4J210	6;4;4;4	6;4;4;4	6;4;4;4	La-related protein 1	LARP1	sp|Q6PKG0|LARP1_HUMAN La-related protein 1 OS=Homo sapiens GN=LARP1 PE=1 SV=2;tr|H0YC33|H0YC33_HUMAN La-related protein 1 (Fragment) OS=Homo sapiens GN=LARP1 PE=1 SV=1;tr|E5RH50|E5RH50_HUMAN La-related protein 1 (Fragment) OS=Homo sapiens GN=LARP1 PE=1 SV=	4	6	6	6	4	3	4	3	5	4	5	5	4	5	4	4	4	3	4	3	5	4	5	5	4	5	4	4	4	3	4	3	5	4	5	5	4	5	4	4	6.9	6.9
Q6UN15;A0A0B4J203	Q6UN15;A0A0B4J203	3;2	3;2	3;2	Pre-mRNA 3-end-processing factor FIP1	FIP1L1	sp|Q6UN15|FIP1_HUMAN Pre-mRNA 3-end-processing factor FIP1 OS=Homo sapiens GN=FIP1L1 PE=1 SV=1;tr|A0A0B4J203|A0A0B4J203_HUMAN Uncharacterized protein OS=Homo sapiens PE=3 SV=1	2	3	3	3	2	3	2	2	3	3	2	3	3	3	3	3	2	3	2	2	3	3	2	3	3	3	3	3	2	3	2	2	3	3	2	3	3	3	3	3	7.2	7.2
Q6Y7W6;I1E4Y6;E7ESB6;C9JHW1;C9JH18	Q6Y7W6;I1E4Y6;E7ESB6	5;4;3;2;1	5;4;3;2;1	5;4;3;2;1	PERQ amino acid-rich with GYF domain-containing protein 2	GIGYF2	sp|Q6Y7W6|PERQ2_HUMAN PERQ amino acid-rich with GYF domain-containing protein 2 OS=Homo sapiens GN=GIGYF2 PE=1 SV=1;tr|I1E4Y6|I1E4Y6_HUMAN PERQ amino acid-rich with GYF domain-containing protein 2 OS=Homo sapiens GN=GIGYF2 PE=1 SV=1;tr|E7ESB6|E7ESB6_HUMAN	5	5	5	5	5	4	4	5	4	4	3	3	3	4	2	2	5	4	4	5	4	4	3	3	3	4	2	2	5	4	4	5	4	4	3	3	3	4	2	2	6.1	6.1
Q6ZN18;G5EA50;H0YH08;F5GZR7;H7BYT4	Q6ZN18;G5EA50	6;5;2;1;1	6;5;2;1;1	6;5;2;1;1	Zinc finger protein AEBP2	AEBP2	sp|Q6ZN18|AEBP2_HUMAN Zinc finger protein AEBP2 OS=Homo sapiens GN=AEBP2 PE=1 SV=2;tr|G5EA50|G5EA50_HUMAN AE binding protein 2, isoform CRA_a OS=Homo sapiens GN=AEBP2 PE=1 SV=1	5	6	6	6	5	5	5	4	5	6	4	4	4	5	5	5	5	5	5	4	5	6	4	4	4	5	5	5	5	5	5	4	5	6	4	4	4	5	5	5	16.6	16.6
Q6ZNA4;H0YLK9	Q6ZNA4;H0YLK9	4;2	4;2	4;2	E3 ubiquitin-protein ligase Arkadia	RNF111	sp|Q6ZNA4|RN111_HUMAN E3 ubiquitin-protein ligase Arkadia OS=Homo sapiens GN=RNF111 PE=1 SV=3;tr|H0YLK9|H0YLK9_HUMAN E3 ubiquitin-protein ligase Arkadia (Fragment) OS=Homo sapiens GN=RNF111 PE=4 SV=1	2	4	4	4	3	2	1	3	1	3	2	4	3	3	3	3	3	2	1	3	1	3	2	4	3	3	3	3	3	2	1	3	1	3	2	4	3	3	3	3	4.8	4.8
Q6ZUT1;E9PQL5;E9PSC8;E9PKA8	Q6ZUT1;E9PQL5;E9PSC8;E9PKA8	5;3;3;3	5;3;3;3	5;3;3;3	Uncharacterized protein C11orf57	C11orf57	sp|Q6ZUT1|CK057_HUMAN Uncharacterized protein C11orf57 OS=Homo sapiens GN=C11orf57 PE=1 SV=2;tr|E9PQL5|E9PQL5_HUMAN Uncharacterized protein C11orf57 (Fragment) OS=Homo sapiens GN=C11orf57 PE=1 SV=1;tr|E9PSC8|E9PSC8_HUMAN Uncharacterized protein C11orf57 (F	4	5	5	5	5	5	5	5	5	5	5	5	5	5	5	5	5	5	5	5	5	5	5	5	5	5	5	5	5	5	5	5	5	5	5	5	5	5	5	5	19.2	19.2
Q71U36;Q13748;Q6PEY2	Q71U36;Q13748;Q6PEY2	15;12;10	1;1;1	0;0;0	Tubulin alpha-1A chain;Tubulin alpha-3C/D chain;Tubulin alpha-3E chain	TUBA1A;TUBA3C;TUBA3E	sp|Q71U36|TBA1A_HUMAN Tubulin alpha-1A chain OS=Homo sapiens GN=TUBA1A PE=1 SV=1;sp|Q13748|TBA3C_HUMAN Tubulin alpha-3C/D chain OS=Homo sapiens GN=TUBA3C PE=1 SV=3;sp|Q6PEY2|TBA3E_HUMAN Tubulin alpha-3E chain OS=Homo sapiens GN=TUBA3E PE=1 SV=2	3	15	1	0	13	14	12	13	14	14	15	12	14	13	15	15	0	0	0	1	0	1	1	0	1	1	1	1	0	0	0	0	0	0	0	0	0	0	0	0	47	2.9
Q7KZF4	Q7KZF4	9	9	9	Staphylococcal nuclease domain-containing protein 1	SND1	sp|Q7KZF4|SND1_HUMAN Staphylococcal nuclease domain-containing protein 1 OS=Homo sapiens GN=SND1 PE=1 SV=1	1	9	9	9	3	3	4	3	4	3	4	5	6	5	6	6	3	3	4	3	4	3	4	5	6	5	6	6	3	3	4	3	4	3	4	5	6	5	6	6	13.1	13.1
Q7L014	Q7L014	58	1	1	Probable ATP-dependent RNA helicase DDX46	DDX46	sp|Q7L014|DDX46_HUMAN Probable ATP-dependent RNA helicase DDX46 OS=Homo sapiens GN=DDX46 PE=1 SV=2	1	58	1	1	56	55	55	56	56	54	56	55	56	56	56	56	1	1	1	1	1	1	1	1	1	1	1	1	1	1	1	1	1	1	1	1	1	1	1	1	55.8	1.8
Q7L4I2;H0YGP9;E1B6W4;E9PI52	Q7L4I2	9;2;2;1	9;2;2;1	9;2;2;1	Arginine/serine-rich coiled-coil protein 2	RSRC2	sp|Q7L4I2|RSRC2_HUMAN Arginine/serine-rich coiled-coil protein 2 OS=Homo sapiens GN=RSRC2 PE=1 SV=1	4	9	9	9	8	8	9	9	9	9	9	9	9	9	9	9	8	8	9	9	9	9	9	9	9	9	9	9	8	8	9	9	9	9	9	9	9	9	9	9	24.7	24.7
Q7RTV0	Q7RTV0	2	2	2	PHD finger-like domain-containing protein 5A	PHF5A	sp|Q7RTV0|PHF5A_HUMAN PHD finger-like domain-containing protein 5A OS=Homo sapiens GN=PHF5A PE=1 SV=1	1	2	2	2	1	1	1	1	1	1	1	2	1	1	1	1	1	1	1	1	1	1	1	2	1	1	1	1	1	1	1	1	1	1	1	2	1	1	1	1	20	20
Q7Z406;A1L2Z2;M0QY43	Q7Z406	11;5;5	5;3;2	5;3;2	Myosin-14	MYH14	sp|Q7Z406|MYH14_HUMAN Myosin-14 OS=Homo sapiens GN=MYH14 PE=1 SV=2	3	11	5	5	6	7	9	9	8	9	8	8	9	9	8	10	1	2	3	3	3	3	2	2	3	3	2	5	1	2	3	3	3	3	2	2	3	3	2	5	6	3
Q7Z4V5;A0A087WT54;K7EPS6;M0R0J3;K7ERA4;A0A087WX58;A0A087WZ99;A0A024R216;Q9Y3E1;H3BPQ6;O75475	Q7Z4V5	29;10;9;6;6;5;2;2;2;1;1	29;10;9;6;6;5;2;2;2;1;1	27;9;9;5;6;5;2;1;1;0;0	Hepatoma-derived growth factor-related protein 2	HDGFRP2	sp|Q7Z4V5|HDGR2_HUMAN Hepatoma-derived growth factor-related protein 2 OS=Homo sapiens GN=HDGFRP2 PE=1 SV=1	11	29	29	27	28	28	27	26	28	26	28	27	29	26	29	27	28	28	27	26	28	26	28	27	29	26	29	27	26	26	25	24	26	24	26	25	27	24	27	25	39.2	39.2
Q7Z6E9;H3BSK8;H3BUN0;A0A087WY32;I3L3Y2	Q7Z6E9;H3BSK8	10;5;2;1;1	10;5;2;1;1	10;5;2;1;1	E3 ubiquitin-protein ligase RBBP6	RBBP6	sp|Q7Z6E9|RBBP6_HUMAN E3 ubiquitin-protein ligase RBBP6 OS=Homo sapiens GN=RBBP6 PE=1 SV=1;tr|H3BSK8|H3BSK8_HUMAN E3 ubiquitin-protein ligase RBBP6 (Fragment) OS=Homo sapiens GN=RBBP6 PE=1 SV=1	5	10	10	10	7	5	6	6	8	6	7	9	7	6	4	5	7	5	6	6	8	6	7	9	7	6	4	5	7	5	6	6	8	6	7	9	7	6	4	5	6.6	6.6
Q86U42	Q86U42	1	1	1	Polyadenylate-binding protein 2	PABPN1	sp|Q86U42|PABP2_HUMAN Polyadenylate-binding protein 2 OS=Homo sapiens GN=PABPN1 PE=1 SV=3	1	1	1	1	1	0	0	0	0	0	1	0	1	1	0	0	1	0	0	0	0	0	1	0	1	1	0	0	1	0	0	0	0	0	1	0	1	1	0	0	5.2	5.2
Q86UK7;H3BQQ2;H3BR87	Q86UK7;H3BQQ2	33;30;5	33;30;5	33;30;5	Zinc finger protein 598	ZNF598	sp|Q86UK7|ZN598_HUMAN Zinc finger protein 598 OS=Homo sapiens GN=ZNF598 PE=1 SV=1;tr|H3BQQ2|H3BQQ2_HUMAN Zinc finger protein 598 OS=Homo sapiens GN=ZNF598 PE=1 SV=1	3	33	33	33	27	24	25	28	26	24	28	22	27	30	29	32	27	24	25	28	26	24	28	22	27	30	29	32	27	24	25	28	26	24	28	22	27	30	29	32	46.3	46.3
Q86W92;H0YFE4;A0A0A0MTP2	Q86W92;H0YFE4;A0A0A0MTP2	2;1;1	2;1;1	2;1;1	Liprin-beta-1	PPFIBP1	sp|Q86W92|LIPB1_HUMAN Liprin-beta-1 OS=Homo sapiens GN=PPFIBP1 PE=1 SV=2;tr|H0YFE4|H0YFE4_HUMAN Liprin-beta-1 (Fragment) OS=Homo sapiens GN=PPFIBP1 PE=1 SV=1;tr|A0A0A0MTP2|A0A0A0MTP2_HUMAN Liprin-beta-1 OS=Homo sapiens GN=PPFIBP1 PE=1 SV=1	3	2	2	2	1	0	1	1	1	0	1	1	1	1	2	1	1	0	1	1	1	0	1	1	1	1	2	1	1	0	1	1	1	0	1	1	1	1	2	1	2.3	2.3
Q86X95;H3BLY3	Q86X95	6;1	6;1	6;1	Corepressor interacting with RBPJ 1	CIR1	sp|Q86X95|CIR1_HUMAN Corepressor interacting with RBPJ 1 OS=Homo sapiens GN=CIR1 PE=1 SV=1	2	6	6	6	4	5	5	3	5	5	4	6	3	5	4	5	4	5	5	3	5	5	4	6	3	5	4	5	4	5	5	3	5	5	4	6	3	5	4	5	13.1	13.1
Q8IUR6	Q8IUR6	2	2	2	CREB3 regulatory factor	CREBRF	sp|Q8IUR6|CRERF_HUMAN CREB3 regulatory factor OS=Homo sapiens GN=CREBRF PE=1 SV=2	1	2	2	2	0	1	0	0	0	1	1	1	0	0	0	0	0	1	0	0	0	1	1	1	0	0	0	0	0	1	0	0	0	1	1	1	0	0	0	0	2.8	2.8
Q8IVM0	Q8IVM0	9	9	9	Coiled-coil domain-containing protein 50	CCDC50	sp|Q8IVM0|CCD50_HUMAN Coiled-coil domain-containing protein 50 OS=Homo sapiens GN=CCDC50 PE=1 SV=1	1	9	9	9	8	7	8	8	5	6	7	8	9	8	8	7	8	7	8	8	5	6	7	8	9	8	8	7	8	7	8	8	5	6	7	8	9	8	8	7	48	48
Q8IWJ2;B8ZZW2;A0A087WZR8;H7BYJ9;H7C010	Q8IWJ2;B8ZZW2	11;6;5;3;1	11;6;5;3;1	11;6;5;3;1	GRIP and coiled-coil domain-containing protein 2	GCC2	sp|Q8IWJ2|GCC2_HUMAN GRIP and coiled-coil domain-containing protein 2 OS=Homo sapiens GN=GCC2 PE=1 SV=4;tr|B8ZZW2|B8ZZW2_HUMAN GRIP and coiled-coil domain-containing protein 2 (Fragment) OS=Homo sapiens GN=GCC2 PE=1 SV=1	5	11	11	11	7	5	7	6	7	4	5	8	4	4	2	4	7	5	7	6	7	4	5	8	4	4	2	4	7	5	7	6	7	4	5	8	4	4	2	4	7.6	7.6
Q8IY47	Q8IY47	1	1	1	Kelch repeat and BTB domain-containing protein 2	KBTBD2	sp|Q8IY47|KBTB2_HUMAN Kelch repeat and BTB domain-containing protein 2 OS=Homo sapiens GN=KBTBD2 PE=1 SV=2	1	1	1	1	1	1	1	1	1	1	1	1	1	1	1	1	1	1	1	1	1	1	1	1	1	1	1	1	1	1	1	1	1	1	1	1	1	1	1	1	1.1	1.1
Q8IY81	Q8IY81	13	13	13	pre-rRNA processing protein FTSJ3	FTSJ3	sp|Q8IY81|SPB1_HUMAN pre-rRNA processing protein FTSJ3 OS=Homo sapiens GN=FTSJ3 PE=1 SV=2	1	13	13	13	12	8	9	6	9	7	7	9	6	6	7	8	12	8	9	6	9	7	7	9	6	6	7	8	12	8	9	6	9	7	7	9	6	6	7	8	21	21
Q8IZ21;A0A0J9YVR0	Q8IZ21	3;1	3;1	3;1	Phosphatase and actin regulator 4	PHACTR4	sp|Q8IZ21|PHAR4_HUMAN Phosphatase and actin regulator 4 OS=Homo sapiens GN=PHACTR4 PE=1 SV=1	2	3	3	3	2	2	2	2	1	3	2	3	2	2	2	3	2	2	2	2	1	3	2	3	2	2	2	3	2	2	2	2	1	3	2	3	2	2	2	3	7.3	7.3
Q8N1G0;H0Y5I5	Q8N1G0;H0Y5I5	2;1	2;1	2;1	Zinc finger protein 687	ZNF687	sp|Q8N1G0|ZN687_HUMAN Zinc finger protein 687 OS=Homo sapiens GN=ZNF687 PE=1 SV=1;tr|H0Y5I5|H0Y5I5_HUMAN Zinc finger protein 687 (Fragment) OS=Homo sapiens GN=ZNF687 PE=1 SV=1	2	2	2	2	1	1	1	2	2	1	1	2	2	1	2	1	1	1	1	2	2	1	1	2	2	1	2	1	1	1	1	2	2	1	1	2	2	1	2	1	2.1	2.1
Q8N1G4	Q8N1G4	2	2	2	Leucine-rich repeat-containing protein 47	LRRC47	sp|Q8N1G4|LRC47_HUMAN Leucine-rich repeat-containing protein 47 OS=Homo sapiens GN=LRRC47 PE=1 SV=1	1	2	2	2	1	0	0	0	1	1	0	1	0	0	0	0	1	0	0	0	1	1	0	1	0	0	0	0	1	0	0	0	1	1	0	1	0	0	0	0	3.9	3.9
Q8N5F7;Q5M9Q1	Q8N5F7	9;3	9;3	9;3	NF-kappa-B-activating protein	NKAP	sp|Q8N5F7|NKAP_HUMAN NF-kappa-B-activating protein OS=Homo sapiens GN=NKAP PE=1 SV=1	2	9	9	9	8	8	8	7	9	9	8	9	9	9	8	9	8	8	8	7	9	9	8	9	9	9	8	9	8	8	8	7	9	9	8	9	9	9	8	9	26.5	26.5
Q8N7H5;B4DGJ5;M0QYC7	Q8N7H5;B4DGJ5	19;10;2	19;10;2	19;10;2	RNA polymerase II-associated factor 1 homolog	PAF1	sp|Q8N7H5|PAF1_HUMAN RNA polymerase II-associated factor 1 homolog OS=Homo sapiens GN=PAF1 PE=1 SV=2;tr|B4DGJ5|B4DGJ5_HUMAN RNA polymerase II-associated factor 1 homolog OS=Homo sapiens GN=PAF1 PE=1 SV=1	3	19	19	19	17	13	6	16	15	14	16	14	12	17	17	17	17	13	6	16	15	14	16	14	12	17	17	17	17	13	6	16	15	14	16	14	12	17	17	17	42.9	42.9
Q8N9T8;H0YFD2;H0YH26;F8WFC1;H0YG91	Q8N9T8	20;5;5;5;2	20;5;5;5;2	20;5;5;5;2	Protein KRI1 homolog	KRI1	sp|Q8N9T8|KRI1_HUMAN Protein KRI1 homolog OS=Homo sapiens GN=KRI1 PE=1 SV=3	5	20	20	20	18	18	18	19	19	19	19	19	19	19	18	19	18	18	18	19	19	19	19	19	19	19	18	19	18	18	18	19	19	19	19	19	19	19	18	19	33.6	33.6
Q8NAV1	Q8NAV1	7	7	7	Pre-mRNA-splicing factor 38A	PRPF38A	sp|Q8NAV1|PR38A_HUMAN Pre-mRNA-splicing factor 38A OS=Homo sapiens GN=PRPF38A PE=1 SV=1	1	7	7	7	6	5	6	6	6	6	6	7	6	6	7	6	6	5	6	6	6	6	6	7	6	6	7	6	6	5	6	6	6	6	6	7	6	6	7	6	23.1	23.1
Q8NC51	Q8NC51	18	18	18	Plasminogen activator inhibitor 1 RNA-binding protein	SERBP1	sp|Q8NC51|PAIRB_HUMAN Plasminogen activator inhibitor 1 RNA-binding protein OS=Homo sapiens GN=SERBP1 PE=1 SV=2	1	18	18	18	16	15	14	14	15	15	17	14	15	16	14	16	16	15	14	14	15	15	17	14	15	16	14	16	16	15	14	14	15	15	17	14	15	16	14	16	56.9	56.9
Q8NI27;A0A0C4DG98;B7ZB98;F2Z2V2;B7ZBA0;H0Y594;H0Y815;H0Y7U4	Q8NI27;A0A0C4DG98	5;4;1;1;1;1;1;1	5;4;1;1;1;1;1;1	5;4;1;1;1;1;1;1	THO complex subunit 2	THOC2	sp|Q8NI27|THOC2_HUMAN THO complex subunit 2 OS=Homo sapiens GN=THOC2 PE=1 SV=2;tr|A0A0C4DG98|A0A0C4DG98_HUMAN THO complex subunit 2 OS=Homo sapiens GN=THOC2 PE=1 SV=1	8	5	5	5	3	3	3	3	4	4	3	3	5	5	3	4	3	3	3	3	4	4	3	3	5	5	3	4	3	3	3	3	4	4	3	3	5	5	3	4	3.5	3.5
Q8TA86;C9J6V2	Q8TA86;C9J6V2	8;4	8;4	8;4	Retinitis pigmentosa 9 protein	RP9	sp|Q8TA86|RP9_HUMAN Retinitis pigmentosa 9 protein OS=Homo sapiens GN=RP9 PE=1 SV=2;tr|C9J6V2|C9J6V2_HUMAN Retinitis pigmentosa 9 protein (Fragment) OS=Homo sapiens GN=RP9 PE=1 SV=1	2	8	8	8	7	8	7	8	8	8	6	8	8	4	5	8	7	8	7	8	8	8	6	8	8	4	5	8	7	8	7	8	8	8	6	8	8	4	5	8	38	38
Q8TAD8	Q8TAD8	6	6	6	Smad nuclear-interacting protein 1	SNIP1	sp|Q8TAD8|SNIP1_HUMAN Smad nuclear-interacting protein 1 OS=Homo sapiens GN=SNIP1 PE=1 SV=1	1	6	6	6	3	1	2	4	1	2	5	6	6	4	3	4	3	1	2	4	1	2	5	6	6	4	3	4	3	1	2	4	1	2	5	6	6	4	3	4	23	23
Q8TE73	Q8TE73	1	1	1	Dynein heavy chain 5, axonemal	DNAH5	sp|Q8TE73|DYH5_HUMAN Dynein heavy chain 5, axonemal OS=Homo sapiens GN=DNAH5 PE=1 SV=3	1	1	1	1	0	1	1	0	0	0	0	0	0	0	0	0	0	1	1	0	0	0	0	0	0	0	0	0	0	1	1	0	0	0	0	0	0	0	0	0	0.4	0.4
Q8TEA8	Q8TEA8	2	2	2	D-tyrosyl-tRNA(Tyr) deacylase 1	DTD1	sp|Q8TEA8|DTD1_HUMAN D-tyrosyl-tRNA(Tyr) deacylase 1 OS=Homo sapiens GN=DTD1 PE=1 SV=2	1	2	2	2	2	1	1	1	0	0	0	0	0	0	0	0	2	1	1	1	0	0	0	0	0	0	0	0	2	1	1	1	0	0	0	0	0	0	0	0	13.9	13.9
Q8TEX9;H0YN14;H0YMR4;H0YN07;H0YLV0;H0YL92;H0YKG5;H0YK93	Q8TEX9;H0YN14	17;13;8;6;4;4;3;2	17;13;8;6;4;4;3;2	17;13;8;6;4;4;3;2	Importin-4	IPO4	sp|Q8TEX9|IPO4_HUMAN Importin-4 OS=Homo sapiens GN=IPO4 PE=1 SV=2;tr|H0YN14|H0YN14_HUMAN Importin-4 OS=Homo sapiens GN=IPO4 PE=1 SV=1	8	17	17	17	12	12	10	12	10	11	12	11	12	11	13	11	12	12	10	12	10	11	12	11	12	11	13	11	12	12	10	12	10	11	12	11	12	11	13	11	20.4	20.4
Q8TF01	Q8TF01	4	4	4	Arginine/serine-rich protein PNISR	PNISR	sp|Q8TF01|PNISR_HUMAN Arginine/serine-rich protein PNISR OS=Homo sapiens GN=PNISR PE=1 SV=2	1	4	4	4	3	4	2	2	2	4	3	3	2	4	2	4	3	4	2	2	2	4	3	3	2	4	2	4	3	4	2	2	2	4	3	3	2	4	2	4	4.7	4.7
Q8WU90;H7C466;F8WB26	Q8WU90	6;1;1	6;1;1	6;1;1	Zinc finger CCCH domain-containing protein 15	ZC3H15	sp|Q8WU90|ZC3HF_HUMAN Zinc finger CCCH domain-containing protein 15 OS=Homo sapiens GN=ZC3H15 PE=1 SV=1	3	6	6	6	6	5	6	5	4	5	4	5	5	5	6	5	6	5	6	5	4	5	4	5	5	5	6	5	6	5	6	5	4	5	4	5	5	5	6	5	18.5	18.5
Q8WUA2	Q8WUA2	12	12	12	Peptidyl-prolyl cis-trans isomerase-like 4	PPIL4	sp|Q8WUA2|PPIL4_HUMAN Peptidyl-prolyl cis-trans isomerase-like 4 OS=Homo sapiens GN=PPIL4 PE=1 SV=1	1	12	12	12	9	10	11	11	10	10	12	12	12	11	11	11	9	10	11	11	10	10	12	12	12	11	11	11	9	10	11	11	10	10	12	12	12	11	11	11	30.7	30.7
Q8WUM4	Q8WUM4	1	1	1	Programmed cell death 6-interacting protein	PDCD6IP	sp|Q8WUM4|PDC6I_HUMAN Programmed cell death 6-interacting protein OS=Homo sapiens GN=PDCD6IP PE=1 SV=1	1	1	1	1	0	0	1	1	1	1	1	1	1	1	1	1	0	0	1	1	1	1	1	1	1	1	1	1	0	0	1	1	1	1	1	1	1	1	1	1	1.5	1.5
Q8WUQ7;K7ENY9;K7EIU6;K7EMQ0;K7EQE3	Q8WUQ7;K7ENY9	14;8;4;2;1	14;8;4;2;1	14;8;4;2;1	Cactin	CACTIN	sp|Q8WUQ7|CATIN_HUMAN Cactin OS=Homo sapiens GN=CACTIN PE=1 SV=3;tr|K7ENY9|K7ENY9_HUMAN Cactin (Fragment) OS=Homo sapiens GN=CACTIN PE=1 SV=1	5	14	14	14	11	9	10	14	10	11	13	14	12	11	13	14	11	9	10	14	10	11	13	14	12	11	13	14	11	9	10	14	10	11	13	14	12	11	13	14	24.3	24.3
Q8WVK2;B8ZZ98;H0YBW5	Q8WVK2;B8ZZ98	8;4;2	8;4;2	8;4;2	U4/U6.U5 small nuclear ribonucleoprotein 27 kDa protein	SNRNP27	sp|Q8WVK2|SNR27_HUMAN U4/U6.U5 small nuclear ribonucleoprotein 27 kDa protein OS=Homo sapiens GN=SNRNP27 PE=1 SV=1;tr|B8ZZ98|B8ZZ98_HUMAN U4/U6.U5 small nuclear ribonucleoprotein 27 kDa protein OS=Homo sapiens GN=SNRNP27 PE=1 SV=1	3	8	8	8	8	8	8	8	8	8	8	8	8	8	8	8	8	8	8	8	8	8	8	8	8	8	8	8	8	8	8	8	8	8	8	8	8	8	8	8	37.4	37.4
Q8WXA9;H0YC47	Q8WXA9	10;1	10;1	10;1	Splicing regulatory glutamine/lysine-rich protein 1	SREK1	sp|Q8WXA9|SREK1_HUMAN Splicing regulatory glutamine/lysine-rich protein 1 OS=Homo sapiens GN=SREK1 PE=1 SV=1	2	10	10	10	9	8	9	9	9	8	9	9	9	9	7	9	9	8	9	9	9	8	9	9	9	9	7	9	9	8	9	9	9	8	9	9	9	9	7	9	26.2	26.2
Q8WXF0	Q8WXF0	5	3	3	Serine/arginine-rich splicing factor 12	SRSF12	sp|Q8WXF0|SRS12_HUMAN Serine/arginine-rich splicing factor 12 OS=Homo sapiens GN=SRSF12 PE=2 SV=1	1	5	3	3	4	4	4	4	4	4	5	5	5	4	2	5	2	2	2	2	2	2	3	3	3	2	0	3	2	2	2	2	2	2	3	3	3	2	0	3	23.4	14.9
Q92541;H0YKX1	Q92541	30;8	30;8	30;8	RNA polymerase-associated protein RTF1 homolog	RTF1	sp|Q92541|RTF1_HUMAN RNA polymerase-associated protein RTF1 homolog OS=Homo sapiens GN=RTF1 PE=1 SV=4	2	30	30	30	29	29	27	29	30	29	30	30	28	29	29	29	29	29	27	29	30	29	30	30	28	29	29	29	29	29	27	29	30	29	30	30	28	29	29	29	39.6	39.6
Q92569;F6TDL0;Q5T4P3	Q92569;F6TDL0	20;19;8	17;16;7	17;16;7	Phosphatidylinositol 3-kinase regulatory subunit gamma	PIK3R3	sp|Q92569|P55G_HUMAN Phosphatidylinositol 3-kinase regulatory subunit gamma OS=Homo sapiens GN=PIK3R3 PE=1 SV=2;tr|F6TDL0|F6TDL0_HUMAN Phosphatidylinositol 3-kinase regulatory subunit gamma OS=Homo sapiens GN=PIK3R3 PE=1 SV=1	3	20	17	17	19	19	20	16	16	16	20	17	18	18	17	19	16	16	17	13	13	13	17	14	15	15	14	16	16	16	17	13	13	13	17	14	15	15	14	16	51.4	44.9
Q92598;A0A0A0MSM0;Q5TBM3;R4GN69	Q92598;A0A0A0MSM0	14;11;2;2	13;10;2;2	12;9;2;2	Heat shock protein 105 kDa	HSPH1	sp|Q92598|HS105_HUMAN Heat shock protein 105 kDa OS=Homo sapiens GN=HSPH1 PE=1 SV=1;tr|A0A0A0MSM0|A0A0A0MSM0_HUMAN Heat shock protein 105 kDa OS=Homo sapiens GN=HSPH1 PE=1 SV=1	4	14	13	12	10	8	10	10	11	9	9	11	11	9	10	9	10	8	10	10	11	9	8	11	10	9	9	9	10	8	10	10	11	9	8	10	10	9	9	9	21.7	20
Q92688	Q92688	6	6	5	Acidic leucine-rich nuclear phosphoprotein 32 family member B	ANP32B	sp|Q92688|AN32B_HUMAN Acidic leucine-rich nuclear phosphoprotein 32 family member B OS=Homo sapiens GN=ANP32B PE=1 SV=1	1	6	6	5	5	4	5	4	5	4	4	5	4	4	4	5	5	4	5	4	5	4	4	5	4	4	4	5	4	3	4	3	4	3	3	4	3	3	3	4	21.1	21.1
Q92900	Q92900	10	10	10	Regulator of nonsense transcripts 1	UPF1	sp|Q92900|RENT1_HUMAN Regulator of nonsense transcripts 1 OS=Homo sapiens GN=UPF1 PE=1 SV=2	1	10	10	10	9	7	8	6	8	6	7	10	7	8	8	9	9	7	8	6	8	6	7	10	7	8	8	9	9	7	8	6	8	6	7	10	7	8	8	9	11.7	11.7
Q93008;O00507	Q93008	8;1	8;1	8;1	Probable ubiquitin carboxyl-terminal hydrolase FAF-X	USP9X	sp|Q93008|USP9X_HUMAN Probable ubiquitin carboxyl-terminal hydrolase FAF-X OS=Homo sapiens GN=USP9X PE=1 SV=3	2	8	8	8	7	5	5	5	6	4	5	7	4	6	3	6	7	5	5	5	6	4	5	7	4	6	3	6	7	5	5	5	6	4	5	7	4	6	3	6	4.1	4.1
Q969S3	Q969S3	2	2	2	Zinc finger protein 622	ZNF622	sp|Q969S3|ZN622_HUMAN Zinc finger protein 622 OS=Homo sapiens GN=ZNF622 PE=1 SV=1	1	2	2	2	2	2	2	2	2	2	2	1	2	2	2	2	2	2	2	2	2	2	2	1	2	2	2	2	2	2	2	2	2	2	2	1	2	2	2	2	6.3	6.3
Q96AG4	Q96AG4	4	4	4	Leucine-rich repeat-containing protein 59	LRRC59	sp|Q96AG4|LRC59_HUMAN Leucine-rich repeat-containing protein 59 OS=Homo sapiens GN=LRRC59 PE=1 SV=1	1	4	4	4	2	0	1	2	2	3	4	4	1	3	2	3	2	0	1	2	2	3	4	4	1	3	2	3	2	0	1	2	2	3	4	4	1	3	2	3	15.6	15.6
Q96C19;H0Y4Y4	Q96C19	4;1	4;1	4;1	EF-hand domain-containing protein D2	EFHD2	sp|Q96C19|EFHD2_HUMAN EF-hand domain-containing protein D2 OS=Homo sapiens GN=EFHD2 PE=1 SV=1	2	4	4	4	4	2	2	1	2	1	2	2	2	2	2	2	4	2	2	1	2	1	2	2	2	2	2	2	4	2	2	1	2	1	2	2	2	2	2	2	18.8	18.8
Q96CT7;M0R2F5	Q96CT7;M0R2F5	6;3	6;3	6;3	Coiled-coil domain-containing protein 124	CCDC124	sp|Q96CT7|CC124_HUMAN Coiled-coil domain-containing protein 124 OS=Homo sapiens GN=CCDC124 PE=1 SV=1;tr|M0R2F5|M0R2F5_HUMAN Coiled-coil domain-containing protein 124 (Fragment) OS=Homo sapiens GN=CCDC124 PE=1 SV=7	2	6	6	6	6	5	6	6	6	5	5	6	4	5	5	4	6	5	6	6	6	5	5	6	4	5	5	4	6	5	6	6	6	5	5	6	4	5	5	4	31.4	31.4
Q96EY7;B8ZZQ4	Q96EY7;B8ZZQ4	3;2	3;2	3;2	Pentatricopeptide repeat domain-containing protein 3, mitochondrial	PTCD3	sp|Q96EY7|PTCD3_HUMAN Pentatricopeptide repeat domain-containing protein 3, mitochondrial OS=Homo sapiens GN=PTCD3 PE=1 SV=3;tr|B8ZZQ4|B8ZZQ4_HUMAN Pentatricopeptide repeat domain-containing protein 3, mitochondrial (Fragment) OS=Homo sapiens GN=PTCD3 PE=1	2	3	3	3	1	0	0	1	2	1	0	2	1	0	0	0	1	0	0	1	2	1	0	2	1	0	0	0	1	0	0	1	2	1	0	2	1	0	0	0	4.8	4.8
Q96GA3;A0A075B6Q4	Q96GA3	7;3	7;3	7;3	Protein LTV1 homolog	LTV1	sp|Q96GA3|LTV1_HUMAN Protein LTV1 homolog OS=Homo sapiens GN=LTV1 PE=1 SV=1	2	7	7	7	4	5	6	6	4	5	4	4	5	6	4	5	4	5	6	6	4	5	4	4	5	6	4	5	4	5	6	6	4	5	4	4	5	6	4	5	17.9	17.9
Q96HR8;D6RIB3	Q96HR8	5;1	5;1	5;1	H/ACA ribonucleoprotein complex non-core subunit NAF1	NAF1	sp|Q96HR8|NAF1_HUMAN H/ACA ribonucleoprotein complex non-core subunit NAF1 OS=Homo sapiens GN=NAF1 PE=1 SV=2	2	5	5	5	5	5	5	5	5	5	5	4	4	5	5	4	5	5	5	5	5	5	5	4	4	5	5	4	5	5	5	5	5	5	5	4	4	5	5	4	14.8	14.8
Q96IZ7;H7C5Q0;C9J713;C9J367;C9JVB3	Q96IZ7;H7C5Q0;C9J713	11;9;7;2;1	11;9;7;2;1	11;9;7;2;1	Serine/Arginine-related protein 53	RSRC1	sp|Q96IZ7|RSRC1_HUMAN Serine/Arginine-related protein 53 OS=Homo sapiens GN=RSRC1 PE=1 SV=1;tr|H7C5Q0|H7C5Q0_HUMAN Serine/Arginine-related protein 53 (Fragment) OS=Homo sapiens GN=RSRC1 PE=1 SV=1;tr|C9J713|C9J713_HUMAN Serine/Arginine-related protein 53 OS	5	11	11	11	10	11	11	10	10	10	8	10	10	8	10	10	10	11	11	10	10	10	8	10	10	8	10	10	10	11	11	10	10	10	8	10	10	8	10	10	34.7	34.7
Q96JC9;F8WFA5;F8WF04;F8WCI9	Q96JC9	10;3;1;1	10;3;1;1	9;2;0;0	ELL-associated factor 1	EAF1	sp|Q96JC9|EAF1_HUMAN ELL-associated factor 1 OS=Homo sapiens GN=EAF1 PE=1 SV=1	4	10	10	9	9	9	7	10	8	9	8	7	8	9	8	8	9	9	7	10	8	9	8	7	8	9	8	8	8	8	6	9	7	8	7	6	7	8	7	7	53.4	53.4
Q96JK2;Q8TBB7;G3V3S1	Q96JK2;Q8TBB7	8;6;3	8;6;3	8;6;3	DDB1- and CUL4-associated factor 5	DCAF5;WDR22	sp|Q96JK2|DCAF5_HUMAN DDB1- and CUL4-associated factor 5 OS=Homo sapiens GN=DCAF5 PE=1 SV=2;tr|Q8TBB7|Q8TBB7_HUMAN DDB1- and CUL4-associated factor 5 OS=Homo sapiens GN=WDR22 PE=1 SV=1	3	8	8	8	7	7	8	3	7	5	3	4	3	4	5	7	7	7	8	3	7	5	3	4	3	4	5	7	7	7	8	3	7	5	3	4	3	4	5	7	8.6	8.6
Q96LB3;E5RGX6;E5RJK3;E5RIF0;E5RH29	Q96LB3	6;1;1;1;1	6;1;1;1;1	6;1;1;1;1	Intraflagellar transport protein 74 homolog	IFT74	sp|Q96LB3|IFT74_HUMAN Intraflagellar transport protein 74 homolog OS=Homo sapiens GN=IFT74 PE=1 SV=1	5	6	6	6	3	4	2	3	4	2	3	4	5	4	4	6	3	4	2	3	4	2	3	4	5	4	4	6	3	4	2	3	4	2	3	4	5	4	4	6	12.8	12.8
Q96LR9	Q96LR9	1	1	1	Apolipoprotein L domain-containing protein 1	APOLD1	sp|Q96LR9|APLD1_HUMAN Apolipoprotein L domain-containing protein 1 OS=Homo sapiens GN=APOLD1 PE=2 SV=2	1	1	1	1	1	1	1	1	1	1	1	1	1	1	1	1	1	1	1	1	1	1	1	1	1	1	1	1	1	1	1	1	1	1	1	1	1	1	1	1	2.5	2.5
Q96QK1	Q96QK1	18	18	18	Vacuolar protein sorting-associated protein 35	VPS35	sp|Q96QK1|VPS35_HUMAN Vacuolar protein sorting-associated protein 35 OS=Homo sapiens GN=VPS35 PE=1 SV=2	1	18	18	18	16	17	15	16	15	15	15	15	15	15	14	14	16	17	15	16	15	15	15	15	15	15	14	14	16	17	15	16	15	15	15	15	15	15	14	14	27.5	27.5
Q96RQ3;G5E9X5;E9PHF7;E9PG35;F5GYT8;F8WDI3	Q96RQ3;G5E9X5;E9PHF7;E9PG35;F5GYT8	8;6;6;5;4;2	8;6;6;5;4;2	8;6;6;5;4;2	Methylcrotonoyl-CoA carboxylase subunit alpha, mitochondrial	MCCC1	sp|Q96RQ3|MCCA_HUMAN Methylcrotonoyl-CoA carboxylase subunit alpha, mitochondrial OS=Homo sapiens GN=MCCC1 PE=1 SV=3;tr|G5E9X5|G5E9X5_HUMAN Methylcrotonoyl-CoA carboxylase subunit alpha, mitochondrial OS=Homo sapiens GN=MCCC1 PE=1 SV=1;tr|E9PHF7|E9PHF7_HUM	6	8	8	8	6	6	5	6	7	4	5	5	4	4	4	6	6	6	5	6	7	4	5	5	4	4	4	6	6	6	5	6	7	4	5	5	4	4	4	6	14.8	14.8
Q96SB8	Q96SB8	1	1	1	Structural maintenance of chromosomes protein 6	SMC6	sp|Q96SB8|SMC6_HUMAN Structural maintenance of chromosomes protein 6 OS=Homo sapiens GN=SMC6 PE=1 SV=2	1	1	1	1	0	0	0	0	0	0	1	0	0	1	1	1	0	0	0	0	0	0	1	0	0	1	1	1	0	0	0	0	0	0	1	0	0	1	1	1	2.4	2.4
Q96T58;F6WRY4	Q96T58;F6WRY4	10;5	10;5	10;5	Msx2-interacting protein	SPEN	sp|Q96T58|MINT_HUMAN Msx2-interacting protein OS=Homo sapiens GN=SPEN PE=1 SV=1;tr|F6WRY4|F6WRY4_HUMAN Msx2-interacting protein (Fragment) OS=Homo sapiens GN=SPEN PE=1 SV=1	2	10	10	10	10	10	10	10	10	10	10	10	10	10	10	10	10	10	10	10	10	10	10	10	10	10	10	10	10	10	10	10	10	10	10	10	10	10	10	10	2.8	2.8
Q99543;H7C3L7	Q99543	5;1	5;1	5;1	DnaJ homolog subfamily C member 2;DnaJ homolog subfamily C member 2, N-terminally processed	DNAJC2	sp|Q99543|DNJC2_HUMAN DnaJ homolog subfamily C member 2 OS=Homo sapiens GN=DNAJC2 PE=1 SV=4	2	5	5	5	1	3	4	3	3	2	4	3	2	3	5	3	1	3	4	3	3	2	4	3	2	3	5	3	1	3	4	3	3	2	4	3	2	3	5	3	9.3	9.3
Q99613;B5ME19;H3BPE4;H3BPE3;H3BTY8	Q99613;B5ME19	25;23;4;3;2	25;23;4;3;2	25;23;4;3;2	Eukaryotic translation initiation factor 3 subunit C;Eukaryotic translation initiation factor 3 subunit C-like protein	EIF3C;EIF3CL	sp|Q99613|EIF3C_HUMAN Eukaryotic translation initiation factor 3 subunit C OS=Homo sapiens GN=EIF3C PE=1 SV=1;sp|B5ME19|EIFCL_HUMAN Eukaryotic translation initiation factor 3 subunit C-like protein OS=Homo sapiens GN=EIF3CL PE=3 SV=1	5	25	25	25	21	22	22	21	24	22	19	23	21	22	23	24	21	22	22	21	24	22	19	23	21	22	23	24	21	22	22	21	24	22	19	23	21	22	23	24	30.4	30.4
Q99615;K7ESP1;K7EIH8;K7EPP7;K7ELJ8;K7ER44;K7EJV7;K7EJL5;K7EN19;K7EJE9;K7EK03;K7EJ24;K7ENB7	Q99615;K7ESP1;K7EIH8;K7EPP7	30;18;18;15;10;9;8;7;7;5;5;4;1	30;18;18;15;10;9;8;7;7;5;5;4;1	30;18;18;15;10;9;8;7;7;5;5;4;1	DnaJ homolog subfamily C member 7	DNAJC7	sp|Q99615|DNJC7_HUMAN DnaJ homolog subfamily C member 7 OS=Homo sapiens GN=DNAJC7 PE=1 SV=2;tr|K7ESP1|K7ESP1_HUMAN DnaJ homolog subfamily C member 7 (Fragment) OS=Homo sapiens GN=DNAJC7 PE=1 SV=1;tr|K7EIH8|K7EIH8_HUMAN DnaJ homolog subfamily C member 7 (Fr	13	30	30	30	25	26	25	22	26	27	25	25	25	27	27	27	25	26	25	22	26	27	25	25	25	27	27	27	25	26	25	22	26	27	25	25	25	27	27	27	61.3	61.3
Q99832	Q99832	4	4	4	T-complex protein 1 subunit eta	CCT7	sp|Q99832|TCPH_HUMAN T-complex protein 1 subunit eta OS=Homo sapiens GN=CCT7 PE=1 SV=2	1	4	4	4	1	1	0	1	1	1	2	2	1	1	2	1	1	1	0	1	1	1	2	2	1	1	2	1	1	1	0	1	1	1	2	2	1	1	2	1	7.9	7.9
Q9BQ39;A0A087WVC1	Q9BQ39;A0A087WVC1	5;4	5;4	4;3	ATP-dependent RNA helicase DDX50	DDX50	sp|Q9BQ39|DDX50_HUMAN ATP-dependent RNA helicase DDX50 OS=Homo sapiens GN=DDX50 PE=1 SV=1;tr|A0A087WVC1|A0A087WVC1_HUMAN ATP-dependent RNA helicase DDX50 OS=Homo sapiens GN=DDX50 PE=1 SV=1	2	5	5	4	3	1	2	3	3	3	3	4	2	3	2	2	3	1	2	3	3	3	3	4	2	3	2	2	2	0	1	2	2	2	2	3	1	2	1	1	9.5	9.5
Q9BRA2;I3L0K2;I3L3M7;I3L2R6	Q9BRA2;I3L0K2;I3L3M7;I3L2R6	4;3;3;2	4;3;3;2	4;3;3;2	Thioredoxin domain-containing protein 17	TXNDC17	sp|Q9BRA2|TXD17_HUMAN Thioredoxin domain-containing protein 17 OS=Homo sapiens GN=TXNDC17 PE=1 SV=1;tr|I3L0K2|I3L0K2_HUMAN Thioredoxin domain-containing protein 17 OS=Homo sapiens GN=TXNDC17 PE=1 SV=1;tr|I3L3M7|I3L3M7_HUMAN Thioredoxin domain-containing pr	4	4	4	4	4	4	4	3	3	4	1	1	2	2	3	4	4	4	4	3	3	4	1	1	2	2	3	4	4	4	4	3	3	4	1	1	2	2	3	4	38.2	38.2
Q9BRL6	Q9BRL6	7	5	5	Serine/arginine-rich splicing factor 8	SRSF8	sp|Q9BRL6|SRSF8_HUMAN Serine/arginine-rich splicing factor 8 OS=Homo sapiens GN=SRSF8 PE=1 SV=1	1	7	5	5	7	6	7	7	7	7	6	7	7	6	7	7	5	4	5	5	5	5	4	5	5	4	5	5	5	4	5	5	5	5	4	5	5	4	5	5	25.2	19.9
Q9BRR8	Q9BRR8	6	6	6	G patch domain-containing protein 1	GPATCH1	sp|Q9BRR8|GPTC1_HUMAN G patch domain-containing protein 1 OS=Homo sapiens GN=GPATCH1 PE=1 SV=1	1	6	6	6	5	4	4	2	4	3	2	4	2	3	4	4	5	4	4	2	4	3	2	4	2	3	4	4	5	4	4	2	4	3	2	4	2	3	4	4	8.7	8.7
Q9BRS2	Q9BRS2	4	4	4	Serine/threonine-protein kinase RIO1	RIOK1	sp|Q9BRS2|RIOK1_HUMAN Serine/threonine-protein kinase RIO1 OS=Homo sapiens GN=RIOK1 PE=1 SV=2	1	4	4	4	2	1	2	1	2	2	1	1	1	3	1	1	2	1	2	1	2	2	1	1	1	3	1	1	2	1	2	1	2	2	1	1	1	3	1	1	8.3	8.3
Q9BRX2	Q9BRX2	7	7	7	Protein pelota homolog	PELO	sp|Q9BRX2|PELO_HUMAN Protein pelota homolog OS=Homo sapiens GN=PELO PE=1 SV=2	1	7	7	7	5	5	5	2	6	5	4	4	3	4	4	5	5	5	5	2	6	5	4	4	3	4	4	5	5	5	5	2	6	5	4	4	3	4	4	5	21.3	21.3
Q9BU76	Q9BU76	6	6	6	Multiple myeloma tumor-associated protein 2	MMTAG2	sp|Q9BU76|MMTA2_HUMAN Multiple myeloma tumor-associated protein 2 OS=Homo sapiens GN=MMTAG2 PE=1 SV=1	1	6	6	6	4	3	4	4	4	4	5	5	4	4	3	5	4	3	4	4	4	4	5	5	4	4	3	5	4	3	4	4	4	4	5	5	4	4	3	5	27	27
Q9BUQ8;H0YI52;H0YIL9;F8VVA2	Q9BUQ8	30;4;2;1	30;4;2;1	30;4;2;1	Probable ATP-dependent RNA helicase DDX23	DDX23	sp|Q9BUQ8|DDX23_HUMAN Probable ATP-dependent RNA helicase DDX23 OS=Homo sapiens GN=DDX23 PE=1 SV=3	4	30	30	30	26	23	27	25	26	27	29	29	27	27	26	26	26	23	27	25	26	27	29	29	27	27	26	26	26	23	27	25	26	27	29	29	27	27	26	26	41.5	41.5
Q9BW71	Q9BW71	9	9	9	HIRA-interacting protein 3	HIRIP3	sp|Q9BW71|HIRP3_HUMAN HIRA-interacting protein 3 OS=Homo sapiens GN=HIRIP3 PE=1 SV=3	1	9	9	9	8	8	8	6	8	8	7	7	6	7	5	9	8	8	8	6	8	8	7	7	6	7	5	9	8	8	8	6	8	8	7	7	6	7	5	9	18	18
Q9BXP5;H7C3A1;H7C1K0;H7C0U8;A0A0A0MSP6	Q9BXP5;H7C3A1	18;13;2;1;1	18;13;2;1;1	18;13;2;1;1	Serrate RNA effector molecule homolog	SRRT	sp|Q9BXP5|SRRT_HUMAN Serrate RNA effector molecule homolog OS=Homo sapiens GN=SRRT PE=1 SV=1;tr|H7C3A1|H7C3A1_HUMAN Serrate RNA effector molecule homolog (Fragment) OS=Homo sapiens GN=SRRT PE=1 SV=1	5	18	18	18	16	16	16	16	15	15	13	14	13	14	14	15	16	16	16	16	15	15	13	14	13	14	14	15	16	16	16	16	15	15	13	14	13	14	14	15	21.3	21.3
Q9BYV8;F8WF85;C9J6R3;C9J9X8;C9JCX6;C9JXA0	Q9BYV8	4;1;1;1;1;1	4;1;1;1;1;1	4;1;1;1;1;1	Centrosomal protein of 41 kDa	CEP41	sp|Q9BYV8|CEP41_HUMAN Centrosomal protein of 41 kDa OS=Homo sapiens GN=CEP41 PE=1 SV=1	6	4	4	4	2	1	3	4	4	2	3	3	4	3	2	3	2	1	3	4	4	2	3	3	4	3	2	3	2	1	3	4	4	2	3	3	4	3	2	3	17.2	17.2
Q9BZI7;A0A087WYC8	Q9BZI7;A0A087WYC8	7;4	7;4	7;4	Regulator of nonsense transcripts 3B	UPF3B	sp|Q9BZI7|REN3B_HUMAN Regulator of nonsense transcripts 3B OS=Homo sapiens GN=UPF3B PE=1 SV=1;tr|A0A087WYC8|A0A087WYC8_HUMAN Regulator of nonsense transcripts 3B OS=Homo sapiens GN=UPF3B PE=1 SV=1	2	7	7	7	6	4	7	7	6	7	7	7	7	7	7	7	6	4	7	7	6	7	7	7	7	7	7	7	6	4	7	7	6	7	7	7	7	7	7	7	16.4	16.4
Q9C0C9;K7ES11	Q9C0C9;K7ES11	3;2	3;2	3;2	E2/E3 hybrid ubiquitin-protein ligase UBE2O	UBE2O	sp|Q9C0C9|UBE2O_HUMAN (E3-independent) E2 ubiquitin-conjugating enzyme OS=Homo sapiens GN=UBE2O PE=1 SV=3;tr|K7ES11|K7ES11_HUMAN (E3-independent) E2 ubiquitin-conjugating enzyme (Fragment) OS=Homo sapiens GN=UBE2O PE=1 SV=1	2	3	3	3	3	3	3	1	3	3	2	2	1	2	2	3	3	3	3	1	3	3	2	2	1	2	2	3	3	3	3	1	3	3	2	2	1	2	2	3	4.3	4.3
Q9H2G2	Q9H2G2	8	8	8	STE20-like serine/threonine-protein kinase	SLK	sp|Q9H2G2|SLK_HUMAN STE20-like serine/threonine-protein kinase OS=Homo sapiens GN=SLK PE=1 SV=1	1	8	8	8	5	5	5	3	5	4	6	4	5	8	5	4	5	5	5	3	5	4	6	4	5	8	5	4	5	5	5	3	5	4	6	4	5	8	5	4	8.6	8.6
Q9H2U1;E7EWK3;H7C5F5	Q9H2U1;E7EWK3	3;2;1	3;2;1	3;2;1	ATP-dependent RNA helicase DHX36	DHX36	sp|Q9H2U1|DHX36_HUMAN ATP-dependent RNA helicase DHX36 OS=Homo sapiens GN=DHX36 PE=1 SV=2;tr|E7EWK3|E7EWK3_HUMAN ATP-dependent RNA helicase DHX36 (Fragment) OS=Homo sapiens GN=DHX36 PE=1 SV=1	3	3	3	3	1	3	0	1	1	2	0	1	1	2	2	1	1	3	0	1	1	2	0	1	1	2	2	1	1	3	0	1	1	2	0	1	1	2	2	1	3.6	3.6
Q9H307;G3V5F0;G3V579	Q9H307	26;5;5	25;5;5	25;5;5	Pinin	PNN	sp|Q9H307|PININ_HUMAN Pinin OS=Homo sapiens GN=PNN PE=1 SV=4	3	26	25	25	23	24	24	25	24	23	23	24	23	24	20	24	22	23	23	24	23	22	22	23	22	23	19	23	22	23	23	24	23	22	22	23	22	23	19	23	39.3	39.3
Q9H3U1	Q9H3U1	2	2	2	Protein unc-45 homolog A	UNC45A	sp|Q9H3U1|UN45A_HUMAN Protein unc-45 homolog A OS=Homo sapiens GN=UNC45A PE=1 SV=1	1	2	2	2	1	1	0	1	1	1	0	0	1	2	1	1	1	1	0	1	1	1	0	0	1	2	1	1	1	1	0	1	1	1	0	0	1	2	1	1	2.8	2.8
Q9H444;P59074	Q9H444	5;1	5;1	5;1	Charged multivesicular body protein 4b	CHMP4B	sp|Q9H444|CHM4B_HUMAN Charged multivesicular body protein 4b OS=Homo sapiens GN=CHMP4B PE=1 SV=1	2	5	5	5	4	4	4	4	4	4	3	4	4	4	4	5	4	4	4	4	4	4	3	4	4	4	4	5	4	4	4	4	4	4	3	4	4	4	4	5	25.9	25.9
Q9H501;A0A087WX71	Q9H501	3;1	3;1	3;1	ESF1 homolog	ESF1	sp|Q9H501|ESF1_HUMAN ESF1 homolog OS=Homo sapiens GN=ESF1 PE=1 SV=1	2	3	3	3	3	2	3	2	1	3	2	3	1	3	2	3	3	2	3	2	1	3	2	3	1	3	2	3	3	2	3	2	1	3	2	3	1	3	2	3	5.2	5.2
Q9H6T3	Q9H6T3	2	2	2	RNA polymerase II-associated protein 3	RPAP3	sp|Q9H6T3|RPAP3_HUMAN RNA polymerase II-associated protein 3 OS=Homo sapiens GN=RPAP3 PE=1 SV=2	1	2	2	2	0	1	0	1	1	1	1	1	2	1	1	1	0	1	0	1	1	1	1	1	2	1	1	1	0	1	0	1	1	1	1	1	2	1	1	1	5	5
Q9H7N4	Q9H7N4	2	2	2	Splicing factor, arginine/serine-rich 19	SCAF1	sp|Q9H7N4|SFR19_HUMAN Splicing factor, arginine/serine-rich 19 OS=Homo sapiens GN=SCAF1 PE=1 SV=3	1	2	2	2	1	1	1	1	0	1	0	1	1	0	0	0	1	1	1	1	0	1	0	1	1	0	0	0	1	1	1	1	0	1	0	1	1	0	0	0	1.9	1.9
Q9H8W4	Q9H8W4	7	7	7	Pleckstrin homology domain-containing family F member 2	PLEKHF2	sp|Q9H8W4|PKHF2_HUMAN Pleckstrin homology domain-containing family F member 2 OS=Homo sapiens GN=PLEKHF2 PE=1 SV=1	1	7	7	7	5	6	7	7	7	6	5	7	7	7	6	7	5	6	7	7	7	6	5	7	7	7	6	7	5	6	7	7	7	6	5	7	7	7	6	7	36.9	36.9
Q9HB71	Q9HB71	7	7	7	Calcyclin-binding protein	CACYBP	sp|Q9HB71|CYBP_HUMAN Calcyclin-binding protein OS=Homo sapiens GN=CACYBP PE=1 SV=2	1	7	7	7	5	5	4	5	5	5	6	5	7	5	5	6	5	5	4	5	5	5	6	5	7	5	5	6	5	5	4	5	5	5	6	5	7	5	5	6	39.9	39.9
Q9HC38	Q9HC38	15	1	0	Glyoxalase domain-containing protein 4	GLOD4	sp|Q9HC38|GLOD4_HUMAN Glyoxalase domain-containing protein 4 OS=Homo sapiens GN=GLOD4 PE=1 SV=1	1	15	1	0	11	12	10	12	13	14	12	15	12	13	12	13	0	0	0	1	1	1	1	1	1	1	1	1	0	0	0	0	0	0	0	0	0	0	0	0	56.2	2.2
Q9HC44	Q9HC44	3	3	3	Vasculin-like protein 1	GPBP1L1	sp|Q9HC44|GPBL1_HUMAN Vasculin-like protein 1 OS=Homo sapiens GN=GPBP1L1 PE=1 SV=1	1	3	3	3	3	3	3	2	2	2	1	2	2	2	0	2	3	3	3	2	2	2	1	2	2	2	0	2	3	3	3	2	2	2	1	2	2	2	0	2	10.5	10.5
Q9HCG8;B7WP74	Q9HCG8	5;1	5;1	5;1	Pre-mRNA-splicing factor CWC22 homolog	CWC22	sp|Q9HCG8|CWC22_HUMAN Pre-mRNA-splicing factor CWC22 homolog OS=Homo sapiens GN=CWC22 PE=1 SV=3	2	5	5	5	5	4	5	5	4	5	4	4	4	4	4	4	5	4	5	5	4	5	4	4	4	4	4	4	5	4	5	5	4	5	4	4	4	4	4	4	5.1	5.1
Q9HCK8;H0YJA4	Q9HCK8	19;9	19;9	19;9	Chromodomain-helicase-DNA-binding protein 8	CHD8	sp|Q9HCK8|CHD8_HUMAN Chromodomain-helicase-DNA-binding protein 8 OS=Homo sapiens GN=CHD8 PE=1 SV=5	2	19	19	19	17	15	14	16	18	18	15	15	15	15	15	16	17	15	14	16	18	18	15	15	15	15	15	16	17	15	14	16	18	18	15	15	15	15	15	16	9.8	9.8
Q9NPJ6;Q5T911;A0A087X0U0	Q9NPJ6;Q5T911	12;10;2	12;10;2	12;10;2	Mediator of RNA polymerase II transcription subunit 4	MED4	sp|Q9NPJ6|MED4_HUMAN Mediator of RNA polymerase II transcription subunit 4 OS=Homo sapiens GN=MED4 PE=1 SV=1;tr|Q5T911|Q5T911_HUMAN Mediator of RNA polymerase II transcription subunit 4 (Fragment) OS=Homo sapiens GN=MED4 PE=1 SV=1	3	12	12	12	10	9	9	8	9	9	8	11	7	10	10	11	10	9	9	8	9	9	8	11	7	10	10	11	10	9	9	8	9	9	8	11	7	10	10	11	60.7	60.7
Q9NQ29;A8MYV2;B8ZZ10;B8ZZ09;B8ZZ12;F8WBC1;F2Z322;B8ZZ08	Q9NQ29;A8MYV2;B8ZZ10	17;13;10;4;3;2;2;2	10;7;5;3;2;1;1;2	10;7;5;3;2;1;1;2	Putative RNA-binding protein Luc7-like 1	LUC7L	sp|Q9NQ29|LUC7L_HUMAN Putative RNA-binding protein Luc7-like 1 OS=Homo sapiens GN=LUC7L PE=1 SV=1;tr|A8MYV2|A8MYV2_HUMAN LUC7-like (S. cerevisiae) OS=Homo sapiens GN=LUC7L PE=1 SV=1;tr|B8ZZ10|B8ZZ10_HUMAN LUC7-like (S. cerevisiae) (Fragment) OS=Homo sapien	8	17	10	10	17	17	16	17	16	17	17	16	17	16	16	17	10	10	10	10	9	10	10	10	10	10	10	10	10	10	10	10	9	10	10	10	10	10	10	10	44.5	27.8
Q9NQ48;C9J0R9;H7C488	Q9NQ48;C9J0R9;H7C488	2;1;1	2;1;1	2;1;1	Leucine zipper transcription factor-like protein 1	LZTFL1	sp|Q9NQ48|LZTL1_HUMAN Leucine zipper transcription factor-like protein 1 OS=Homo sapiens GN=LZTFL1 PE=1 SV=1;tr|C9J0R9|C9J0R9_HUMAN Leucine zipper transcription factor-like protein 1 (Fragment) OS=Homo sapiens GN=LZTFL1 PE=1 SV=7;tr|H7C488|H7C488_HUMAN Leu	3	2	2	2	0	1	0	0	1	0	0	0	0	0	0	0	0	1	0	0	1	0	0	0	0	0	0	0	0	1	0	0	1	0	0	0	0	0	0	0	8	8
Q9NQ88	Q9NQ88	2	2	2	Fructose-2,6-bisphosphatase TIGAR	TIGAR	sp|Q9NQ88|TIGAR_HUMAN Fructose-2,6-bisphosphatase TIGAR OS=Homo sapiens GN=TIGAR PE=1 SV=1	1	2	2	2	1	1	1	1	1	2	1	1	0	1	1	1	1	1	1	1	1	2	1	1	0	1	1	1	1	1	1	1	1	2	1	1	0	1	1	1	11.1	11.1
Q9NR12;D6RF83;H7BYK4;D6RH06;D6RAN1	Q9NR12;D6RF83;H7BYK4;D6RH06	6;3;3;3;1	6;3;3;3;1	6;3;3;3;1	PDZ and LIM domain protein 7	PDLIM7	sp|Q9NR12|PDLI7_HUMAN PDZ and LIM domain protein 7 OS=Homo sapiens GN=PDLIM7 PE=1 SV=1;tr|D6RF83|D6RF83_HUMAN PDZ and LIM domain protein 7 (Fragment) OS=Homo sapiens GN=PDLIM7 PE=1 SV=1;tr|H7BYK4|H7BYK4_HUMAN PDZ and LIM domain protein 7 (Fragment) OS=Homo	5	6	6	6	5	5	5	6	4	6	5	5	4	6	4	6	5	5	5	6	4	6	5	5	4	6	4	6	5	5	5	6	4	6	5	5	4	6	4	6	15.1	15.1
Q9NR30	Q9NR30	5	4	4	Nucleolar RNA helicase 2	DDX21	sp|Q9NR30|DDX21_HUMAN Nucleolar RNA helicase 2 OS=Homo sapiens GN=DDX21 PE=1 SV=5	1	5	4	4	2	2	4	1	2	2	2	2	1	2	2	1	1	1	3	0	1	1	1	1	0	1	1	0	1	1	3	0	1	1	1	1	0	1	1	0	7.9	6
Q9NRN7;E9PLW6	Q9NRN7;E9PLW6	2;1	2;1	2;1	L-aminoadipate-semialdehyde dehydrogenase-phosphopantetheinyl transferase	AASDHPPT	sp|Q9NRN7|ADPPT_HUMAN L-aminoadipate-semialdehyde dehydrogenase-phosphopantetheinyl transferase OS=Homo sapiens GN=AASDHPPT PE=1 SV=2;tr|E9PLW6|E9PLW6_HUMAN L-aminoadipate-semialdehyde dehydrogenase-phosphopantetheinyl transferase (Fragment) OS=Homo sapien	2	2	2	2	2	2	2	2	2	2	2	2	1	2	2	2	2	2	2	2	2	2	2	2	1	2	2	2	2	2	2	2	2	2	2	2	1	2	2	2	8.7	8.7
Q9NRX4	Q9NRX4	2	2	2	14 kDa phosphohistidine phosphatase	PHPT1	sp|Q9NRX4|PHP14_HUMAN 14 kDa phosphohistidine phosphatase OS=Homo sapiens GN=PHPT1 PE=1 SV=1	1	2	2	2	2	2	2	2	2	2	2	2	2	2	2	1	2	2	2	2	2	2	2	2	2	2	2	1	2	2	2	2	2	2	2	2	2	2	2	1	24	24
Q9NW75	Q9NW75	2	2	2	G patch domain-containing protein 2	GPATCH2	sp|Q9NW75|GPTC2_HUMAN G patch domain-containing protein 2 OS=Homo sapiens GN=GPATCH2 PE=1 SV=1	1	2	2	2	1	2	1	0	1	0	0	0	0	0	0	0	1	2	1	0	1	0	0	0	0	0	0	0	1	2	1	0	1	0	0	0	0	0	0	0	5.1	5.1
Q9NW82;D6RIW8	Q9NW82;D6RIW8	9;5	9;5	9;5	WD repeat-containing protein 70	WDR70	sp|Q9NW82|WDR70_HUMAN WD repeat-containing protein 70 OS=Homo sapiens GN=WDR70 PE=1 SV=1;tr|D6RIW8|D6RIW8_HUMAN WD repeat-containing protein 70 OS=Homo sapiens GN=WDR70 PE=1 SV=1	2	9	9	9	6	5	5	6	4	6	5	7	7	7	9	6	6	5	5	6	4	6	5	7	7	7	9	6	6	5	5	6	4	6	5	7	7	7	9	6	17.4	17.4
Q9NWB6;X6R9F1	Q9NWB6	12;3	12;3	12;3	Arginine and glutamate-rich protein 1	ARGLU1	sp|Q9NWB6|ARGL1_HUMAN Arginine and glutamate-rich protein 1 OS=Homo sapiens GN=ARGLU1 PE=1 SV=1	2	12	12	12	9	10	12	11	11	10	12	10	11	11	12	11	9	10	12	11	11	10	12	10	11	11	12	11	9	10	12	11	11	10	12	10	11	11	12	11	27.8	27.8
Q9NWH9;H7BXE3;H0YL55;H7C3F4;H0YMW8;H0YNF3;H0YMR6;H0YLE6;H0YKU6;H0YLW7;H0YMM0;H0YKH2	Q9NWH9;H7BXE3	11;7;5;5;3;3;3;3;3;2;2;1	11;7;5;5;3;3;3;3;3;2;2;1	11;7;5;5;3;3;3;3;3;2;2;1	SAFB-like transcription modulator	SLTM	sp|Q9NWH9|SLTM_HUMAN SAFB-like transcription modulator OS=Homo sapiens GN=SLTM PE=1 SV=2;tr|H7BXE3|H7BXE3_HUMAN SAFB-like transcription modulator (Fragment) OS=Homo sapiens GN=SLTM PE=1 SV=1	12	11	11	11	4	4	6	10	4	8	7	4	10	4	6	5	4	4	6	10	4	8	7	4	10	4	6	5	4	4	6	10	4	8	7	4	10	4	6	5	14.3	14.3
Q9NX08	Q9NX08	1	1	1	COMM domain-containing protein 8	COMMD8	sp|Q9NX08|COMD8_HUMAN COMM domain-containing protein 8 OS=Homo sapiens GN=COMMD8 PE=1 SV=1	1	1	1	1	1	1	1	1	1	1	1	1	1	1	1	1	1	1	1	1	1	1	1	1	1	1	1	1	1	1	1	1	1	1	1	1	1	1	1	1	10.9	10.9
Q9NX58;D6RDJ1	Q9NX58	9;3	9;3	9;3	Cell growth-regulating nucleolar protein	LYAR	sp|Q9NX58|LYAR_HUMAN Cell growth-regulating nucleolar protein OS=Homo sapiens GN=LYAR PE=1 SV=2	2	9	9	9	6	5	7	8	7	6	9	8	8	7	6	8	6	5	7	8	7	6	9	8	8	7	6	8	6	5	7	8	7	6	9	8	8	7	6	8	30.6	30.6
Q9NXE8;A0A087WY60	Q9NXE8	4;1	4;1	4;1	Pre-mRNA-splicing factor CWC25 homolog	CWC25	sp|Q9NXE8|CWC25_HUMAN Pre-mRNA-splicing factor CWC25 homolog OS=Homo sapiens GN=CWC25 PE=1 SV=1	2	4	4	4	2	2	2	1	1	2	3	3	2	2	3	3	2	2	2	1	1	2	3	3	2	2	3	3	2	2	2	1	1	2	3	3	2	2	3	3	11.3	11.3
Q9NYF8;H0YF14	Q9NYF8	46;10	46;10	5;5	Bcl-2-associated transcription factor 1	BCLAF1	sp|Q9NYF8|BCLF1_HUMAN Bcl-2-associated transcription factor 1 OS=Homo sapiens GN=BCLAF1 PE=1 SV=2	2	46	46	5	42	42	43	44	44	44	43	43	43	43	46	44	42	42	43	44	44	44	43	43	43	43	46	44	5	5	5	5	5	5	4	4	5	5	5	5	45.5	45.5
Q9NZE8;D3YTC1	Q9NZE8;D3YTC1	2;1	2;1	2;1	39S ribosomal protein L35, mitochondrial	MRPL35	sp|Q9NZE8|RM35_HUMAN 39S ribosomal protein L35, mitochondrial OS=Homo sapiens GN=MRPL35 PE=1 SV=3;tr|D3YTC1|D3YTC1_HUMAN 39S ribosomal protein L35, mitochondrial OS=Homo sapiens GN=MRPL35 PE=1 SV=1	2	2	2	2	2	2	2	2	2	2	2	2	2	2	2	2	2	2	2	2	2	2	2	2	2	2	2	2	2	2	2	2	2	2	2	2	2	2	2	2	9	9
Q9NZI8	Q9NZI8	2	2	2	Insulin-like growth factor 2 mRNA-binding protein 1	IGF2BP1	sp|Q9NZI8|IF2B1_HUMAN Insulin-like growth factor 2 mRNA-binding protein 1 OS=Homo sapiens GN=IGF2BP1 PE=1 SV=2	1	2	2	2	1	0	1	2	1	0	2	1	1	1	0	1	1	0	1	2	1	0	2	1	1	1	0	1	1	0	1	2	1	0	2	1	1	1	0	1	4.7	4.7
Q9P1F3;Q5SZC9	Q9P1F3;Q5SZC9	2;1	2;1	2;1	Costars family protein ABRACL	ABRACL	sp|Q9P1F3|ABRAL_HUMAN Costars family protein ABRACL OS=Homo sapiens GN=ABRACL PE=1 SV=1;tr|Q5SZC9|Q5SZC9_HUMAN Costars family protein ABRACL OS=Homo sapiens GN=ABRACL PE=1 SV=1	2	2	2	2	2	2	2	2	2	2	2	2	2	2	2	2	2	2	2	2	2	2	2	2	2	2	2	2	2	2	2	2	2	2	2	2	2	2	2	2	39.5	39.5
Q9P258	Q9P258	12	12	12	Protein RCC2	RCC2	sp|Q9P258|RCC2_HUMAN Protein RCC2 OS=Homo sapiens GN=RCC2 PE=1 SV=2	1	12	12	12	9	9	10	8	8	9	10	8	8	7	8	10	9	9	10	8	8	9	10	8	8	7	8	10	9	9	10	8	8	9	10	8	8	7	8	10	29.1	29.1
Q9P2J5;A0A087WXY1	Q9P2J5	20;1	20;1	20;1	Leucine--tRNA ligase, cytoplasmic	LARS	sp|Q9P2J5|SYLC_HUMAN Leucine--tRNA ligase, cytoplasmic OS=Homo sapiens GN=LARS PE=1 SV=2	2	20	20	20	17	14	17	13	15	14	17	16	16	15	16	16	17	14	17	13	15	14	17	16	16	15	16	16	17	14	17	13	15	14	17	16	16	15	16	16	20.2	20.2
Q9UBB4;B1AHE4;B1AHE3	Q9UBB4	12;5;2	12;5;2	12;5;2	Ataxin-10	ATXN10	sp|Q9UBB4|ATX10_HUMAN Ataxin-10 OS=Homo sapiens GN=ATXN10 PE=1 SV=1	3	12	12	12	11	10	8	10	7	8	7	9	7	10	9	8	11	10	8	10	7	8	7	9	7	10	9	8	11	10	8	10	7	8	7	9	7	10	9	8	29.9	29.9
Q9UDY2;U3KQJ2;B1AN86;B1AN85	Q9UDY2	18;2;2;1	18;2;2;1	18;2;2;1	Tight junction protein ZO-2	TJP2	sp|Q9UDY2|ZO2_HUMAN Tight junction protein ZO-2 OS=Homo sapiens GN=TJP2 PE=1 SV=2	4	18	18	18	10	10	10	10	13	14	3	10	5	9	10	10	10	10	10	10	13	14	3	10	5	9	10	10	10	10	10	10	13	14	3	10	5	9	10	10	19.6	19.6
Q9UEU0;H0YJL5;H0YJJ5;J3KMW2;G3V5I2;H0YJ10	Q9UEU0	10;4;3;2;2;2	10;4;3;2;2;2	10;4;3;2;2;2	Vesicle transport through interaction with t-SNAREs homolog 1B	VTI1B	sp|Q9UEU0|VTI1B_HUMAN Vesicle transport through interaction with t-SNAREs homolog 1B OS=Homo sapiens GN=VTI1B PE=1 SV=3	6	10	10	10	10	10	10	9	9	10	8	7	8	9	8	8	10	10	10	9	9	10	8	7	8	9	8	8	10	10	10	9	9	10	8	7	8	9	8	8	55.6	55.6
Q9UG63;C9JHK9;C9JZV3	Q9UG63;C9JHK9;C9JZV3	4;2;2	4;2;2	4;2;2	ATP-binding cassette sub-family F member 2	ABCF2	sp|Q9UG63|ABCF2_HUMAN ATP-binding cassette sub-family F member 2 OS=Homo sapiens GN=ABCF2 PE=1 SV=2;tr|C9JHK9|C9JHK9_HUMAN ATP-binding cassette sub-family F member 2 (Fragment) OS=Homo sapiens GN=ABCF2 PE=1 SV=1;tr|C9JZV3|C9JZV3_HUMAN ATP-binding cassette	3	4	4	4	0	0	2	2	2	3	2	3	2	3	3	3	0	0	2	2	2	3	2	3	2	3	3	3	0	0	2	2	2	3	2	3	2	3	3	3	6.6	6.6
Q9UHB7	Q9UHB7	3	3	3	AF4/FMR2 family member 4	AFF4	sp|Q9UHB7|AFF4_HUMAN AF4/FMR2 family member 4 OS=Homo sapiens GN=AFF4 PE=1 SV=1	1	3	3	3	3	3	3	3	3	3	3	3	3	3	3	3	3	3	3	3	3	3	3	3	3	3	3	3	3	3	3	3	3	3	3	3	3	3	3	3	4.3	4.3
Q9UHD1;E9PPQ5;E9PIZ4;E9PSD5;E9PHZ2;E9PL00	Q9UHD1;E9PPQ5;E9PIZ4;E9PSD5	8;5;4;4;2;1	8;5;4;4;2;1	8;5;4;4;2;1	Cysteine and histidine-rich domain-containing protein 1	CHORDC1	sp|Q9UHD1|CHRD1_HUMAN Cysteine and histidine-rich domain-containing protein 1 OS=Homo sapiens GN=CHORDC1 PE=1 SV=2;tr|E9PPQ5|E9PPQ5_HUMAN Cysteine and histidine-rich domain-containing protein 1 OS=Homo sapiens GN=CHORDC1 PE=1 SV=1;tr|E9PIZ4|E9PIZ4_HUMAN Cy	6	8	8	8	5	6	4	5	7	4	7	7	5	8	6	7	5	6	4	5	7	4	7	7	5	8	6	7	5	6	4	5	7	4	7	7	5	8	6	7	38.9	38.9
Q9UHV9	Q9UHV9	3	3	3	Prefoldin subunit 2	PFDN2	sp|Q9UHV9|PFD2_HUMAN Prefoldin subunit 2 OS=Homo sapiens GN=PFDN2 PE=1 SV=1	1	3	3	3	2	2	3	2	2	2	2	3	3	2	2	2	2	2	3	2	2	2	2	3	3	2	2	2	2	2	3	2	2	2	2	3	3	2	2	2	20.8	20.8
Q9UJC3	Q9UJC3	12	12	12	Protein Hook homolog 1	HOOK1	sp|Q9UJC3|HOOK1_HUMAN Protein Hook homolog 1 OS=Homo sapiens GN=HOOK1 PE=1 SV=2	1	12	12	12	7	9	9	7	10	8	6	6	9	8	9	9	7	9	9	7	10	8	6	6	9	8	9	9	7	9	9	7	10	8	6	6	9	8	9	9	21.8	21.8
Q9UJW0;E5RGG1;H9KVE0;E5RI97;E5RK21	Q9UJW0;E5RGG1;H9KVE0	3;2;2;1;1	3;2;2;1;1	3;2;2;1;1	Dynactin subunit 4	DCTN4	sp|Q9UJW0|DCTN4_HUMAN Dynactin subunit 4 OS=Homo sapiens GN=DCTN4 PE=1 SV=1;tr|E5RGG1|E5RGG1_HUMAN Dynactin subunit 4 (Fragment) OS=Homo sapiens GN=DCTN4 PE=1 SV=1;tr|H9KVE0|H9KVE0_HUMAN Dynactin subunit 4 (Fragment) OS=Homo sapiens GN=DCTN4 PE=1 SV=1	5	3	3	3	1	1	1	2	2	2	2	2	2	3	2	2	1	1	1	2	2	2	2	2	2	3	2	2	1	1	1	2	2	2	2	2	2	3	2	2	8	8
Q9UKE5;C9J338;C9JVV1	Q9UKE5	11;4;1	11;4;1	9;2;1	TRAF2 and NCK-interacting protein kinase	TNIK	sp|Q9UKE5|TNIK_HUMAN TRAF2 and NCK-interacting protein kinase OS=Homo sapiens GN=TNIK PE=1 SV=1	3	11	11	9	9	6	10	8	8	8	7	8	7	8	11	10	9	6	10	8	8	8	7	8	7	8	11	10	7	4	8	6	6	6	5	6	6	6	9	8	10.2	10.2
Q9UKJ3	Q9UKJ3	7	7	7	G patch domain-containing protein 8	GPATCH8	sp|Q9UKJ3|GPTC8_HUMAN G patch domain-containing protein 8 OS=Homo sapiens GN=GPATCH8 PE=1 SV=2	1	7	7	7	5	5	5	5	7	5	6	6	6	5	5	5	5	5	5	5	7	5	6	6	6	5	5	5	5	5	5	5	7	5	6	6	6	5	5	5	6.9	6.9
Q9UMX1	Q9UMX1	4	4	4	Suppressor of fused homolog	SUFU	sp|Q9UMX1|SUFU_HUMAN Suppressor of fused homolog OS=Homo sapiens GN=SUFU PE=1 SV=2	1	4	4	4	2	1	3	2	2	2	3	3	2	3	3	2	2	1	3	2	2	2	3	3	2	3	3	2	2	1	3	2	2	2	3	3	2	3	3	2	11.4	11.4
Q9UN79	Q9UN79	1	1	1	Transcription factor SOX-13	SOX13	sp|Q9UN79|SOX13_HUMAN Transcription factor SOX-13 OS=Homo sapiens GN=SOX13 PE=1 SV=3	1	1	1	1	0	0	0	0	0	0	0	0	0	0	1	0	0	0	0	0	0	0	0	0	0	0	1	0	0	0	0	0	0	0	0	0	0	0	1	0	1.8	1.8
Q9UNE7;H3BS86;H3BTA3;H3BUD0	Q9UNE7;H3BS86;H3BTA3;H3BUD0	16;10;9;9	16;10;9;9	16;10;9;9	E3 ubiquitin-protein ligase CHIP	STUB1	sp|Q9UNE7|CHIP_HUMAN E3 ubiquitin-protein ligase CHIP OS=Homo sapiens GN=STUB1 PE=1 SV=2;tr|H3BS86|H3BS86_HUMAN E3 ubiquitin-protein ligase CHIP (Fragment) OS=Homo sapiens GN=STUB1 PE=1 SV=7;tr|H3BTA3|H3BTA3_HUMAN E3 ubiquitin-protein ligase CHIP (Fragment	4	16	16	16	15	12	13	14	14	14	13	15	14	12	14	15	15	12	13	14	14	14	13	15	14	12	14	15	15	12	13	14	14	14	13	15	14	12	14	15	60.7	60.7
Q9UNI6;V9GYV5;V9GY92	Q9UNI6;V9GYV5;V9GY92	3;2;2	3;2;2	3;2;2	Dual specificity protein phosphatase 12	DUSP12	sp|Q9UNI6|DUS12_HUMAN Dual specificity protein phosphatase 12 OS=Homo sapiens GN=DUSP12 PE=1 SV=1;tr|V9GYV5|V9GYV5_HUMAN Dual-specificity protein phosphatase 12 OS=Homo sapiens GN=DUSP12 PE=1 SV=1;tr|V9GY92|V9GY92_HUMAN Dual-specificity protein phosphatase	3	3	3	3	2	2	2	2	3	2	3	3	3	2	2	1	2	2	2	2	3	2	3	3	3	2	2	1	2	2	2	2	3	2	3	3	3	2	2	1	12.1	12.1
Q9UQ35;I3L4D8;I3L182;I3L1I8;A0A087X1W1;I3L0N7;I3L3Q8;I3L4U6;I3L1C0	Q9UQ35	86;27;19;12;10;6;4;3;3	86;27;19;12;10;6;4;3;3	86;27;19;12;10;6;4;3;3	Serine/arginine repetitive matrix protein 2	SRRM2	sp|Q9UQ35|SRRM2_HUMAN Serine/arginine repetitive matrix protein 2 OS=Homo sapiens GN=SRRM2 PE=1 SV=2	9	86	86	86	80	78	80	79	83	81	84	85	83	82	83	83	80	78	80	79	83	81	84	85	83	82	83	83	80	78	80	79	83	81	84	85	83	82	83	83	42.4	42.4
Q9UQ80;F8VR77;H0YIN7;F8W0A3	Q9UQ80;F8VR77	4;3;1;1	4;3;1;1	4;3;1;1	Proliferation-associated protein 2G4	PA2G4	sp|Q9UQ80|PA2G4_HUMAN Proliferation-associated protein 2G4 OS=Homo sapiens GN=PA2G4 PE=1 SV=3;tr|F8VR77|F8VR77_HUMAN Proliferation-associated protein 2G4 OS=Homo sapiens GN=PA2G4 PE=1 SV=1	4	4	4	4	3	3	2	4	3	3	4	4	4	4	4	3	3	3	2	4	3	3	4	4	4	4	4	3	3	3	2	4	3	3	4	4	4	4	4	3	12.2	12.2
Q9Y230;M0R0Y3;X6R2L4;M0QXI6;M0R0Z0	Q9Y230;M0R0Y3	16;11;5;3;1	16;11;5;3;1	16;11;5;3;1	RuvB-like 2	RUVBL2	sp|Q9Y230|RUVB2_HUMAN RuvB-like 2 OS=Homo sapiens GN=RUVBL2 PE=1 SV=3;tr|M0R0Y3|M0R0Y3_HUMAN RuvB-like helicase OS=Homo sapiens GN=RUVBL2 PE=1 SV=1	5	16	16	16	10	13	15	12	12	12	11	14	12	12	12	10	10	13	15	12	12	12	11	14	12	12	12	10	10	13	15	12	12	12	11	14	12	12	12	10	39.5	39.5
Q9Y237;H0Y4T6;J3KMW3;H0Y8P6;H0Y610	Q9Y237;H0Y4T6;J3KMW3;H0Y8P6;H0Y610	2;1;1;1;1	2;1;1;1;1	2;1;1;1;1	Peptidyl-prolyl cis-trans isomerase NIMA-interacting 4	PIN4	sp|Q9Y237|PIN4_HUMAN Peptidyl-prolyl cis-trans isomerase NIMA-interacting 4 OS=Homo sapiens GN=PIN4 PE=1 SV=1;tr|H0Y4T6|H0Y4T6_HUMAN Peptidyl-prolyl cis-trans isomerase NIMA-interacting 4 (Fragment) OS=Homo sapiens GN=PIN4 PE=1 SV=1;tr|J3KMW3|J3KMW3_HUMAN	5	2	2	2	1	1	0	0	0	0	1	1	2	2	1	0	1	1	0	0	0	0	1	1	2	2	1	0	1	1	0	0	0	0	1	1	2	2	1	0	17.6	17.6
Q9Y265;E7ETR0	Q9Y265;E7ETR0	2;1	2;1	2;1	RuvB-like 1	RUVBL1	sp|Q9Y265|RUVB1_HUMAN RuvB-like 1 OS=Homo sapiens GN=RUVBL1 PE=1 SV=1;tr|E7ETR0|E7ETR0_HUMAN RuvB-like helicase OS=Homo sapiens GN=RUVBL1 PE=1 SV=1	2	2	2	2	2	1	2	2	1	0	2	1	1	1	1	1	2	1	2	2	1	0	2	1	1	1	1	1	2	1	2	2	1	0	2	1	1	1	1	1	5	5
Q9Y266;A0A0A0MSU9;A0A0A0MSS4	Q9Y266	16;7;6	16;7;6	16;7;6	Nuclear migration protein nudC	NUDC	sp|Q9Y266|NUDC_HUMAN Nuclear migration protein nudC OS=Homo sapiens GN=NUDC PE=1 SV=1	3	16	16	16	16	16	15	14	14	14	13	14	15	15	14	14	16	16	15	14	14	14	13	14	15	15	14	14	16	16	15	14	14	14	13	14	15	15	14	14	52.6	52.6
Q9Y2I1;C9J715	Q9Y2I1	3;1	3;1	3;1	Nischarin	NISCH	sp|Q9Y2I1|NISCH_HUMAN Nischarin OS=Homo sapiens GN=NISCH PE=1 SV=3	2	3	3	3	2	2	1	2	2	2	2	1	3	2	2	2	2	2	1	2	2	2	2	1	3	2	2	2	2	2	1	2	2	2	2	1	3	2	2	2	2.2	2.2
Q9Y2V2	Q9Y2V2	1	1	1	Calcium-regulated heat stable protein 1	CARHSP1	sp|Q9Y2V2|CHSP1_HUMAN Calcium-regulated heat-stable protein 1 OS=Homo sapiens GN=CARHSP1 PE=1 SV=2	1	1	1	1	1	1	1	1	1	1	1	1	1	1	1	1	1	1	1	1	1	1	1	1	1	1	1	1	1	1	1	1	1	1	1	1	1	1	1	1	10.9	10.9
Q9Y2W1	Q9Y2W1	37	36	36	Thyroid hormone receptor-associated protein 3	THRAP3	sp|Q9Y2W1|TR150_HUMAN Thyroid hormone receptor-associated protein 3 OS=Homo sapiens GN=THRAP3 PE=1 SV=2	1	37	36	36	32	32	34	32	31	35	32	34	32	34	33	34	31	31	33	31	30	34	31	33	31	33	32	33	31	31	33	31	30	34	31	33	31	33	32	33	36.5	36.5
Q9Y2W2;F5H5G4;F5GXS9	Q9Y2W2	6;2;1	6;2;1	6;2;1	WW domain-binding protein 11	WBP11	sp|Q9Y2W2|WBP11_HUMAN WW domain-binding protein 11 OS=Homo sapiens GN=WBP11 PE=1 SV=1	3	6	6	6	4	4	3	2	3	4	1	5	1	3	1	3	4	4	3	2	3	4	1	5	1	3	1	3	4	4	3	2	3	4	1	5	1	3	1	3	17.5	17.5
Q9Y2Z0	Q9Y2Z0	6	6	6	Suppressor of G2 allele of SKP1 homolog	SUGT1	sp|Q9Y2Z0|SGT1_HUMAN Protein SGT1 homolog OS=Homo sapiens GN=SUGT1 PE=1 SV=3	1	6	6	6	4	4	3	4	3	4	5	3	4	4	4	3	4	4	3	4	3	4	5	3	4	4	4	3	4	4	3	4	3	4	5	3	4	4	4	3	20.8	20.8
Q9Y383;A0A0A6YYC3;A0A0A6YYJ8;V9GZ75;F8WEU3;REV__E5RJG4;REV__E5RH23;REV__U3KQK2;REV__E5RGU5;REV__E5RGP2;REV__E5RHF8;REV__E5RG21;REV__E5RJH1;REV__Q6P2R3;REV__Q5TCU3;REV__P07951;REV__CON__Q3SX28;REV__Q5TCU8;REV__Q5T6A0;REV__E5RIV2;REV__Q8IYX8;REV__G3V140;REV__E5RFY4;REV__O15078;REV__J3KNF5	Q9Y383;A0A0A6YYC3;A0A0A6YYJ8	20;18;18;2;2;1;1;1;1;1;1;1;1;1;1;1;1;1;1;1;1;1;1;1;1	20;18;18;2;2;1;1;1;1;1;1;1;1;1;1;1;1;1;1;1;1;1;1;1;1	13;12;12;1;1;1;1;1;1;1;1;1;1;1;1;1;1;1;1;1;1;1;1;1;1	Putative RNA-binding protein Luc7-like 2	LUC7L2;C7orf55-LUC7L2	sp|Q9Y383|LC7L2_HUMAN Putative RNA-binding protein Luc7-like 2 OS=Homo sapiens GN=LUC7L2 PE=1 SV=2;tr|A0A0A6YYC3|A0A0A6YYC3_HUMAN Protein C7orf55-LUC7L2 OS=Homo sapiens GN=C7orf55-LUC7L2 PE=4 SV=1;tr|A0A0A6YYJ8|A0A0A6YYJ8_HUMAN Putative RNA-binding protein	25	20	20	13	20	20	19	20	20	20	20	19	20	19	19	20	20	20	19	20	20	20	20	19	20	19	19	20	13	13	13	13	13	13	13	13	13	13	13	13	44.9	44.9
Q9Y3F4;H0YH33	Q9Y3F4	12;4	12;4	12;4	Serine-threonine kinase receptor-associated protein	STRAP	sp|Q9Y3F4|STRAP_HUMAN Serine-threonine kinase receptor-associated protein OS=Homo sapiens GN=STRAP PE=1 SV=1	2	12	12	12	9	8	12	7	9	11	10	10	9	10	11	9	9	8	12	7	9	11	10	10	9	10	11	9	9	8	12	7	9	11	10	10	9	10	11	9	47.1	47.1
Q9Y3I0	Q9Y3I0	8	8	8	tRNA-splicing ligase RtcB homolog	RTCB	sp|Q9Y3I0|RTCB_HUMAN tRNA-splicing ligase RtcB homolog OS=Homo sapiens GN=RTCB PE=1 SV=1	1	8	8	8	3	5	4	7	6	5	5	5	6	5	5	6	3	5	4	7	6	5	5	5	6	5	5	6	3	5	4	7	6	5	5	5	6	5	5	6	21.6	21.6
Q9Y3S2;D6RCK7;D6R9C8;D6R8Y9;D6RBR7	Q9Y3S2	3;1;1;1;1	3;1;1;1;1	3;1;1;1;1	Zinc finger protein 330	ZNF330	sp|Q9Y3S2|ZN330_HUMAN Zinc finger protein 330 OS=Homo sapiens GN=ZNF330 PE=1 SV=1	5	3	3	3	1	3	2	3	3	2	2	2	3	3	3	3	1	3	2	3	3	2	2	2	3	3	3	3	1	3	2	3	3	2	2	2	3	3	3	3	13.4	13.4
Q9Y3U8;J3QSB5;J3KTD3	Q9Y3U8;J3QSB5	3;2;1	3;2;1	3;2;1	60S ribosomal protein L36	RPL36	sp|Q9Y3U8|RL36_HUMAN 60S ribosomal protein L36 OS=Homo sapiens GN=RPL36 PE=1 SV=3;tr|J3QSB5|J3QSB5_HUMAN 60S ribosomal protein L36 OS=Homo sapiens GN=RPL36 PE=1 SV=1	3	3	3	3	3	3	3	3	3	3	3	3	3	3	3	3	3	3	3	3	3	3	3	3	3	3	3	3	3	3	3	3	3	3	3	3	3	3	3	3	28.6	28.6
X6R700;Q9Y3Y2;A0A087X1B7;Q5T7Y7	X6R700;Q9Y3Y2;A0A087X1B7	3;3;2;1	3;3;2;1	3;3;2;1	Chromatin target of PRMT1 protein	CHTOP	tr|X6R700|X6R700_HUMAN Chromatin target of PRMT1 protein OS=Homo sapiens GN=CHTOP PE=1 SV=1;sp|Q9Y3Y2|CHTOP_HUMAN Chromatin target of PRMT1 protein OS=Homo sapiens GN=CHTOP PE=1 SV=2;tr|A0A087X1B7|A0A087X1B7_HUMAN Chromatin target of PRMT1 protein OS=Homo	4	3	3	3	2	2	3	1	2	1	2	2	2	1	2	1	2	2	3	1	2	1	2	2	2	1	2	1	2	2	3	1	2	1	2	2	2	1	2	1	18.8	18.8
Q9Y5B9	Q9Y5B9	9	9	9	FACT complex subunit SPT16	SUPT16H	sp|Q9Y5B9|SP16H_HUMAN FACT complex subunit SPT16 OS=Homo sapiens GN=SUPT16H PE=1 SV=1	1	9	9	9	5	5	6	4	6	5	4	5	3	6	6	7	5	5	6	4	6	5	4	5	3	6	6	7	5	5	6	4	6	5	4	5	3	6	6	7	9.6	9.6
Q9Y5K6	Q9Y5K6	16	16	16	CD2-associated protein	CD2AP	sp|Q9Y5K6|CD2AP_HUMAN CD2-associated protein OS=Homo sapiens GN=CD2AP PE=1 SV=1	1	16	16	16	12	12	14	13	15	14	13	14	15	14	15	15	12	12	14	13	15	14	13	14	15	14	15	15	12	12	14	13	15	14	13	14	15	14	15	15	34	34
Q9Y5S2	Q9Y5S2	2	2	2	Serine/threonine-protein kinase MRCK beta	CDC42BPB	sp|Q9Y5S2|MRCKB_HUMAN Serine/threonine-protein kinase MRCK beta OS=Homo sapiens GN=CDC42BPB PE=1 SV=2	1	2	2	2	1	2	1	1	1	0	2	2	2	2	2	1	1	2	1	1	1	0	2	2	2	2	2	1	1	2	1	1	1	0	2	2	2	2	2	1	1.8	1.8
Q9Y5S9;A0A0J9YW13	Q9Y5S9	8;3	8;3	8;3	RNA-binding protein 8A	RBM8A	sp|Q9Y5S9|RBM8A_HUMAN RNA-binding protein 8A OS=Homo sapiens GN=RBM8A PE=1 SV=1	2	8	8	8	7	8	8	8	8	8	6	7	6	8	7	6	7	8	8	8	8	8	6	7	6	8	7	6	7	8	8	8	8	8	6	7	6	8	7	6	60.3	60.3
Q9Y5X3;Q5QPE4;Q5QPE5;A0A087WUY5;U3KQL0;U3KQP5;G3V2U1;H0YJF8;G3V4Z5	Q9Y5X3;Q5QPE4;Q5QPE5	23;14;13;11;1;1;1;1;1	23;14;13;11;1;1;1;1;1	22;13;12;11;1;1;0;0;0	Sorting nexin-5	SNX5	sp|Q9Y5X3|SNX5_HUMAN Sorting nexin-5 OS=Homo sapiens GN=SNX5 PE=1 SV=1;tr|Q5QPE4|Q5QPE4_HUMAN Sorting nexin-5 (Fragment) OS=Homo sapiens GN=SNX5 PE=1 SV=6;tr|Q5QPE5|Q5QPE5_HUMAN Sorting nexin-5 (Fragment) OS=Homo sapiens GN=SNX5 PE=1 SV=1	9	23	23	22	21	21	22	21	21	22	21	21	20	21	20	22	21	21	22	21	21	22	21	21	20	21	20	22	21	20	22	20	21	22	21	21	20	21	20	22	61.9	61.9
Q9Y617	Q9Y617	3	3	3	Phosphoserine aminotransferase	PSAT1	sp|Q9Y617|SERC_HUMAN Phosphoserine aminotransferase OS=Homo sapiens GN=PSAT1 PE=1 SV=2	1	3	3	3	3	3	2	3	2	1	2	1	3	2	3	1	3	3	2	3	2	1	2	1	3	2	3	1	3	3	2	3	2	1	2	1	3	2	3	1	8.9	8.9
Q9Y696	Q9Y696	11	11	11	Chloride intracellular channel protein 4	CLIC4	sp|Q9Y696|CLIC4_HUMAN Chloride intracellular channel protein 4 OS=Homo sapiens GN=CLIC4 PE=1 SV=4	1	11	11	11	10	8	10	8	7	9	7	9	9	9	8	10	10	8	10	8	7	9	7	9	9	9	8	10	10	8	10	8	7	9	7	9	9	9	8	10	57.7	57.7
Q9Y6W5	Q9Y6W5	4	4	4	Wiskott-Aldrich syndrome protein family member 2	WASF2	sp|Q9Y6W5|WASF2_HUMAN Wiskott-Aldrich syndrome protein family member 2 OS=Homo sapiens GN=WASF2 PE=1 SV=3	1	4	4	4	3	3	3	1	3	4	2	3	1	3	2	4	3	3	3	1	3	4	2	3	1	3	2	4	3	3	3	1	3	4	2	3	1	3	2	4	11	11
S4R3H4;E7EQT4;Q9UKV3;G3V3B0;A0A087WYN3;REV__A0A0J9YY76;REV__H0Y7L4;REV__A0A0J9YWQ8;REV__A0A0A0MSQ4;REV__G3V3B0;REV__B1AK53	S4R3H4;E7EQT4;Q9UKV3;G3V3B0	46;45;45;27;2;1;1;1;1;1;1	46;45;45;27;2;1;1;1;1;1;1	37;36;36;19;2;0;0;0;0;0;0	Apoptotic chromatin condensation inducer in the nucleus	ACIN1	tr|S4R3H4|S4R3H4_HUMAN Apoptotic chromatin condensation inducer in the nucleus OS=Homo sapiens GN=ACIN1 PE=1 SV=1;tr|E7EQT4|E7EQT4_HUMAN Apoptotic chromatin condensation inducer in the nucleus OS=Homo sapiens GN=ACIN1 PE=1 SV=2;sp|Q9UKV3|ACINU_HUMAN Apopto	11	46	46	37	43	45	45	44	46	44	38	38	39	42	40	43	43	45	45	44	46	44	38	38	39	42	40	43	34	36	36	35	37	35	29	29	30	33	31	34	45.8	45.8
[truncated: 82 more columns]
