# Supplementary material for: FER-mediated phosphorylation and PIK3R2 recruitment on IRS4 promotes AKT activation and tumorigenesis in ovarian cancer cells
Source: eLife. 2022 May 12;11:e76183. doi: 10.7554/eLife.76183 (PMC9098222; doi:10.7554/eLife.76183)
Supplement: Supplementary file 11. — The IRS4-WT, IRS4-Y656F, and IRS4-Y828F interactome is shown in this file. [file elife-76183-supp11.xlsx]

## Sheet: proteinGroups
	Groups	Samples
	IRS4-WT	A1	A2	A3
	IRS4-Y656F	B1	B2	B3
	IRS4-Y828F	C1	C2	C3
Protein IDs	Majority protein IDs	Peptide counts (all)	Peptide counts (razor+unique)	Peptide counts (unique)	Protein names	Gene names	Fasta headers	Number of proteins	Peptides	Razor + unique peptides	Unique peptides	Peptides A1	Peptides A2	Peptides A3	Peptides B1	Peptides B2	Peptides B3	Peptides C1	Peptides C2	Peptides C3	Razor + unique peptides A1	Razor + unique peptides A2	Razor + unique peptides A3	Razor + unique peptides B1	Razor + unique peptides B2	Razor + unique peptides B3	Razor + unique peptides C1	Razor + unique peptides C2	Razor + unique peptides C3	Unique peptides A1	Unique peptides A2	Unique peptides A3	Unique peptides B1	Unique peptides B2	Unique peptides B3	Unique peptides C1	Unique peptides C2	Unique peptides C3	Sequence coverage [%]	Unique + razor sequence coverage [%]	Unique sequence coverage [%]	Mol. weight [kDa]	Sequence length	Sequence lengths	Q-value	Score	Identification type A1	Identification type A2	Identification type A3
E5RIU6;A0A087WZZ9;A0A024QZP7;P06493;K7ELV5;E7ESI2;G3V5T9;P24941;Q00526;G3V317;F8VXD2;F8VYH9;F8VZZ0;F8VTV8;F8VWX7;F8VZ51;K7EJ83;H0YAZ9;Q9BVE2;E7EUK8;E5RGN0;A0A087X209;A0A087WZU2;F5H6Z0;J3QSD7;Q00535;P11802;Q00534;P50750;Q96Q40;O94921;Q07002;Q00536;Q00537;Q9NYV4;Q14004	E5RIU6;A0A087WZZ9;A0A024QZP7;P06493;K7ELV5;E7ESI2;G3V5T9;P24941;Q00526	4;4;4;4;2;2;2;2;2;1;1;1;1;1;1;1;1;1;1;1;1;1;1;1;1;1;1;1;1;1;1;1;1;1;1;1	4;4;4;4;2;2;2;2;2;1;1;1;1;1;1;1;1;1;1;1;1;1;1;1;1;1;1;1;1;1;1;1;1;1;1;1	4;4;4;4;2;2;2;2;2;1;1;1;1;1;1;1;1;1;1;1;1;1;1;1;1;1;1;1;1;1;1;1;1;1;1;1	Cyclin-dependent kinase 1;Cyclin-dependent kinase 2;Cyclin-dependent kinase 3	CDK1;CDC2;CDK3;CDK2	tr|E5RIU6|E5RIU6_HUMAN Cyclin-dependent kinase 1 (Fragment) OS=Homo sapiens GN=CDK1 PE=1 SV=2;tr|A0A087WZZ9|A0A087WZZ9_HUMAN Cyclin-dependent kinase 1 OS=Homo sapiens GN=CDK1 PE=1 SV=1;tr|A0A024QZP7|A0A024QZP7_HUMAN Cell division cycle 2, G1 to S and G2 to	36	4	4	4	2	3	4	2	3	1	3	3	3	2	3	4	2	3	1	3	3	3	2	3	4	2	3	1	3	3	3	22.2	22.2	22.2	21.738	189	189;224;297;297;165;238;346;298;305;39;132;170;186;201;203;208;213;260;324;340;393;418;448;470;1201;292;303;326;372;435;469;472;496;523;1490;1512	0	11.575	By MS/MS	By MS/MS	By MS/MS
A0A024R4E5;Q00341;H0Y394;C9JIZ1;H7C0A4;C9J5E5;C9JZI8;C9JHS7;C9JHZ8;C9JES8;H7BZC3;H7C2D1;C9JT62;C9JK79;C9JBS3;C9JEJ8;A0A0U1RVI6;C9JHN6;C9JQ82;C9JMQ6;C9JHS9;C9J739;H7C3D0	A0A024R4E5;Q00341;H0Y394	34;33;25;11;11;10;9;8;8;8;7;6;5;5;4;4;4;4;3;2;1;1;1	34;33;25;11;11;10;9;8;8;8;7;6;5;5;4;4;4;4;3;2;1;1;1	34;33;25;11;11;10;9;8;8;8;7;6;5;5;4;4;4;4;3;2;1;1;1	Vigilin	HDLBP	tr|A0A024R4E5|A0A024R4E5_HUMAN High density lipoprotein binding protein (Vigilin), isoform CRA_a OS=Homo sapiens GN=HDLBP PE=1 SV=1;sp|Q00341|VIGLN_HUMAN Vigilin OS=Homo sapiens GN=HDLBP PE=1 SV=2;tr|H0Y394|H0Y394_HUMAN Vigilin (Fragment) OS=Homo sapiens G	23	34	34	34	27	28	27	29	29	30	27	27	26	27	28	27	29	29	30	27	27	26	27	28	27	29	29	30	27	27	26	30.8	30.8	30.8	141.44	1268	1268;1268;973;224;333;221;164;126;141;147;267;308;96;128;69;79;81;82;54;47;17;19;126	0	150.56	By MS/MS	By MS/MS	By MS/MS
A0A024R4M0;P46781;B5MCT8;C9JM19;F2Z3C0;A8MXK4	A0A024R4M0;P46781;B5MCT8;C9JM19	12;12;8;8;3;3	12;12;8;8;3;3	12;12;8;8;3;3	40S ribosomal protein S9	RPS9	tr|A0A024R4M0|A0A024R4M0_HUMAN 40S ribosomal protein S9 OS=Homo sapiens GN=RPS9 PE=1 SV=1;sp|P46781|RS9_HUMAN 40S ribosomal protein S9 OS=Homo sapiens GN=RPS9 PE=1 SV=3;tr|B5MCT8|B5MCT8_HUMAN 40S ribosomal protein S9 OS=Homo sapiens GN=RPS9 PE=1 SV=1;tr|C9	6	12	12	12	12	12	12	12	12	12	12	12	12	12	12	12	12	12	12	12	12	12	12	12	12	12	12	12	12	12	12	52.1	52.1	52.1	22.591	194	194;194;139;156;77;79	0	38.396	By MS/MS	By MS/MS	By MS/MS
A0A075B6H6;A0A087WZW8;A0A087X1V9;P01834	A0A075B6H6;A0A087WZW8;A0A087X1V9;P01834	1;1;1;1	1;1;1;1	1;1;1;1	Ig kappa chain C region	IGKC;IGKV3-11	tr|A0A075B6H6|A0A075B6H6_HUMAN Ig kappa chain C region (Fragment) OS=Homo sapiens GN=IGKC PE=1 SV=1;tr|A0A087WZW8|A0A087WZW8_HUMAN Ig kappa chain C region OS=Homo sapiens GN=IGKC PE=1 SV=2;tr|A0A087X1V9|A0A087X1V9_HUMAN Ig kappa chain C region OS=Homo sapi	4	1	1	1	1	1	1	1	1	1	1	1	1	1	1	1	1	1	1	1	1	1	1	1	1	1	1	1	1	1	1	18.7	18.7	18.7	11.609	107	107;119;239;106	0.0035119	2.641	By MS/MS	By MS/MS	By matching
A0A075B6L1;A0A075B6L0;A0A075B6K9;A0A075B6K8;A0A0B4J231;P0CG06;P0CG05;P0CG04;P0CF74;A0M8Q6;B9A064	A0A075B6L1;A0A075B6L0;A0A075B6K9;A0A075B6K8;A0A0B4J231;P0CG06;P0CG05;P0CG04;P0CF74;A0M8Q6;B9A064	1;1;1;1;1;1;1;1;1;1;1	1;1;1;1;1;1;1;1;1;1;1	1;1;1;1;1;1;1;1;1;1;1	Ig lambda-3 chain C regions;Ig lambda-2 chain C regions;Ig lambda-1 chain C regions;Ig lambda-6 chain C region;Ig lambda-7 chain C region;Immunoglobulin lambda-like polypeptide 5	IGLC7;IGLC3;IGLC2;IGLC1;IGLL5;IGLC6	tr|A0A075B6L1|A0A075B6L1_HUMAN Ig lambda-7 chain C region (Fragment) OS=Homo sapiens GN=IGLC7 PE=1 SV=2;tr|A0A075B6L0|A0A075B6L0_HUMAN Ig lambda-3 chain C regions (Fragment) OS=Homo sapiens GN=IGLC3 PE=1 SV=2;tr|A0A075B6K9|A0A075B6K9_HUMAN Ig lambda-2 chai	11	1	1	1	1	0	0	0	1	1	0	1	1	1	0	0	0	1	1	0	1	1	1	0	0	0	1	1	0	1	1	14.2	14.2	14.2	11.196	106	106;106;106;106;215;106;106;106;106;106;214	0.0069025	2.5111	By MS/MS
A0A0G2JMB2;A0A075B6N7;P01877;P01876	A0A0G2JMB2;A0A075B6N7;P01877;P01876	1;1;1;1	1;1;1;1	1;1;1;1	Ig alpha-2 chain C region;Ig alpha-1 chain C region	IGHA2;IGHA1	tr|A0A0G2JMB2|A0A0G2JMB2_HUMAN Ig alpha-2 chain C region (Fragment) OS=Homo sapiens GN=IGHA2 PE=1 SV=1;tr|A0A075B6N7|A0A075B6N7_HUMAN Ig alpha-2 chain C region (Fragment) OS=Homo sapiens GN=IGHA2 PE=1 SV=1;sp|P01877|IGHA2_HUMAN Ig alpha-2 chain C region OS	4	1	1	1	1	1	1	1	0	1	0	1	1	1	1	1	1	0	1	0	1	1	1	1	1	1	0	1	0	1	1	2.9	2.9	2.9	36.508	340	340;340;340;353	0.0035492	2.7013	By matching	By matching	By MS/MS
A0A087WT45;A0A075B793;Q4V328;A0A087WXA6	A0A087WT45;A0A075B793;Q4V328;A0A087WXA6	2;2;2;1	2;2;2;1	2;2;2;1	GRIP1-associated protein 1	GRIPAP1	tr|A0A087WT45|A0A087WT45_HUMAN GRIP1-associated protein 1 OS=Homo sapiens GN=GRIPAP1 PE=1 SV=1;tr|A0A075B793|A0A075B793_HUMAN GRIP1-associated protein 1 OS=Homo sapiens GN=GRIPAP1 PE=1 SV=2;sp|Q4V328|GRAP1_HUMAN GRIP1-associated protein 1 OS=Homo sapiens G	4	2	2	2	0	1	1	0	0	2	2	0	1	0	1	1	0	0	2	2	0	1	0	1	1	0	0	2	2	0	1	2.6	2.6	2.6	90.856	796	796;810;841;302	0	3.4841		By matching	By MS/MS
A0A087WT19;A0A087X1C6;P60369;P60370;P60331;P60412;P60409	A0A087WT19;A0A087X1C6;P60369;P60370;P60331;P60412;P60409	1;1;1;1;1;1;1	1;1;1;1;1;1;1	1;1;1;1;1;1;1	Keratin-associated protein 10-3;Keratin-associated protein 10-5;Keratin-associated protein 10-1;Keratin-associated protein 10-11;Keratin-associated protein 10-7	KRTAP10-9;KRTAP10-6;KRTAP10-3;KRTAP10-5;KRTAP10-1;KRTAP10-11;KRTAP10-7	tr|A0A087WT19|A0A087WT19_HUMAN Keratin-associated protein 10-9 OS=Homo sapiens GN=KRTAP10-9 PE=4 SV=1;tr|A0A087X1C6|A0A087X1C6_HUMAN Keratin-associated protein 10-6 OS=Homo sapiens GN=KRTAP10-6 PE=4 SV=1;sp|P60369|KR103_HUMAN Keratin-associated protein 10-	7	1	1	1	0	0	0	0	0	0	0	0	1	0	0	0	0	0	0	0	0	1	0	0	0	0	0	0	0	0	1	5.2	5.2	5.2	19.72	192	192;244;221;271;282;298;375	0	3.3301
M0QYH3;A0A087WTP3;Q92945;M0QXW7;M0R0I5	M0QYH3;A0A087WTP3;Q92945;M0QXW7;M0R0I5	2;2;2;1;1	2;2;2;1;1	2;2;2;1;1	Far upstream element-binding protein 2	KHSRP	tr|M0QYH3|M0QYH3_HUMAN Far upstream element-binding protein 2 (Fragment) OS=Homo sapiens GN=KHSRP PE=1 SV=1;tr|A0A087WTP3|A0A087WTP3_HUMAN Far upstream element-binding protein 2 OS=Homo sapiens GN=KHSRP PE=1 SV=1;sp|Q92945|FUBP2_HUMAN Far upstream element-	5	2	2	2	1	1	1	1	0	0	1	2	1	1	1	1	1	0	0	1	2	1	1	1	1	1	0	0	1	2	1	15.4	15.4	15.4	18.017	169	169;711;711;116;279	0	3.4472	By matching	By matching	By MS/MS
A0A087WTY7;Q9H227	A0A087WTY7;Q9H227	1;1	1;1	1;1	Cytosolic beta-glucosidase	GBA3	tr|A0A087WTY7|A0A087WTY7_HUMAN Cytosolic beta-glucosidase OS=Homo sapiens GN=GBA3 PE=1 SV=1;sp|Q9H227|GBA3_HUMAN Cytosolic beta-glucosidase OS=Homo sapiens GN=GBA3 PE=1 SV=2	2	1	1	1	1	0	0	0	1	0	1	1	1	1	0	0	0	1	0	1	1	1	1	0	0	0	1	0	1	1	1	1.5	1.5	1.5	53.532	468	468;469	0.0035367	2.6902	By MS/MS
A0A087WU44;Q3L8U1;J3KRH9;J3KSW5	A0A087WU44;Q3L8U1	12;12;2;2	12;12;2;2	12;12;2;2	Chromodomain-helicase-DNA-binding protein 9	CHD9	tr|A0A087WU44|A0A087WU44_HUMAN Chromodomain-helicase-DNA-binding protein 9 OS=Homo sapiens GN=CHD9 PE=1 SV=1;sp|Q3L8U1|CHD9_HUMAN Chromodomain-helicase-DNA-binding protein 9 OS=Homo sapiens GN=CHD9 PE=1 SV=2	4	12	12	12	12	12	11	12	12	12	11	11	11	12	12	11	12	12	12	11	11	11	12	12	11	12	12	12	11	11	11	14.7	14.7	14.7	105.94	963	963;2897;113;122	0	78.845	By MS/MS	By MS/MS	By MS/MS
A0A087WUD3;Q9NRP0	A0A087WUD3;Q9NRP0	1;1	1;1	1;1	Oligosaccharyltransferase complex subunit OSTC	OSTC	tr|A0A087WUD3|A0A087WUD3_HUMAN Oligosaccharyltransferase complex subunit OSTC OS=Homo sapiens GN=OSTC PE=1 SV=1;sp|Q9NRP0|OSTC_HUMAN Oligosaccharyltransferase complex subunit OSTC OS=Homo sapiens GN=OSTC PE=1 SV=1	2	1	1	1	1	0	1	1	0	0	0	0	1	1	0	1	1	0	0	0	0	1	1	0	1	1	0	0	0	0	1	14.5	14.5	14.5	9.369	83	83;149	0	4.4713	By MS/MS		By MS/MS
E7ETK0;A0A087WUS0;P62847	E7ETK0;A0A087WUS0;P62847	4;4;4	4;4;4	4;4;4	40S ribosomal protein S24	RPS24	tr|E7ETK0|E7ETK0_HUMAN 40S ribosomal protein S24 OS=Homo sapiens GN=RPS24 PE=1 SV=1;tr|A0A087WUS0|A0A087WUS0_HUMAN 40S ribosomal protein S24 OS=Homo sapiens GN=RPS24 PE=1 SV=1;sp|P62847|RS24_HUMAN 40S ribosomal protein S24 OS=Homo sapiens GN=RPS24 PE=1 SV=	3	4	4	4	4	4	4	4	4	4	4	4	4	4	4	4	4	4	4	4	4	4	4	4	4	4	4	4	4	4	4	35.1	35.1	35.1	15.197	131	131;132;133	0	24.168	By MS/MS	By MS/MS	By MS/MS
A0A087WUT6;O60841	A0A087WUT6;O60841	29;29	29;29	29;29	Eukaryotic translation initiation factor 5B	EIF5B	tr|A0A087WUT6|A0A087WUT6_HUMAN Eukaryotic translation initiation factor 5B OS=Homo sapiens GN=EIF5B PE=1 SV=1;sp|O60841|IF2P_HUMAN Eukaryotic translation initiation factor 5B OS=Homo sapiens GN=EIF5B PE=1 SV=4	2	29	29	29	25	24	26	28	26	27	26	25	24	25	24	26	28	26	27	26	25	24	25	24	26	28	26	27	26	25	24	28.5	28.5	28.5	138.68	1220	1220;1220	0	169.93	By MS/MS	By MS/MS	By MS/MS
A0A087WUV8;A0A087X2B5;P35613;R4GN83;R4GMX5;I3L192	A0A087WUV8;A0A087X2B5;P35613;R4GN83;R4GMX5;I3L192	2;2;2;1;1;1	2;2;2;1;1;1	2;2;2;1;1;1	Basigin	BSG	tr|A0A087WUV8|A0A087WUV8_HUMAN Basigin OS=Homo sapiens GN=BSG PE=1 SV=1;tr|A0A087X2B5|A0A087X2B5_HUMAN Basigin (Fragment) OS=Homo sapiens GN=BSG PE=1 SV=1;sp|P35613|BASI_HUMAN Basigin OS=Homo sapiens GN=BSG PE=1 SV=2;tr|R4GN83|R4GN83_HUMAN Basigin (Fragmen	6	2	2	2	1	0	2	2	1	1	1	2	1	1	0	2	2	1	1	1	2	1	1	0	2	2	1	1	1	2	1	16.9	16.9	16.9	20.542	189	189;221;385;52;84;161	0	3.688	By MS/MS		By MS/MS
A0A0A0MS08;A0A087X1C7;A0A0G2JNK4;A0A087WV47;A0A087X079;A0A087WYC5;P01857;A0A0A0MS07;A0A075B6N8;A0A087WXL8;A0A087WVW2;P01860;A0A0G2JPD4;P01861	A0A0A0MS08;A0A087X1C7;A0A0G2JNK4;A0A087WV47;A0A087X079;A0A087WYC5;P01857;A0A0A0MS07;A0A075B6N8;A0A087WXL8;A0A087WVW2;P01860	4;4;4;4;4;4;4;2;2;2;2;2;1;1	4;4;4;4;4;4;4;2;2;2;2;2;1;1	4;4;4;4;4;4;4;2;2;2;2;2;1;1	Ig gamma-1 chain C region;Ig gamma-3 chain C region	IGHG1;IGHG3	tr|A0A0A0MS08|A0A0A0MS08_HUMAN Ig gamma-1 chain C region (Fragment) OS=Homo sapiens GN=IGHG1 PE=1 SV=1;tr|A0A087X1C7|A0A087X1C7_HUMAN Ig gamma-1 chain C region OS=Homo sapiens GN=IGHG1 PE=1 SV=1;tr|A0A0G2JNK4|A0A0G2JNK4_HUMAN Ig gamma-1 chain C region OS=H	14	4	4	4	2	3	3	2	1	4	3	3	3	2	3	3	2	1	4	3	3	3	2	3	3	2	1	4	3	3	3	12.5	12.5	12.5	43.911	399	399;462;464;466;473;475;330;295;377;517;521;377;327;327	0	17.43	By MS/MS	By MS/MS	By MS/MS
A0A087WV73;P46087;F5GWB7;F5H709;F5GYR3	A0A087WV73;P46087	5;5;1;1;1	5;5;1;1;1	5;5;1;1;1	Probable 28S rRNA (cytosine(4447)-C(5))-methyltransferase	NOP2	tr|A0A087WV73|A0A087WV73_HUMAN Probable 28S rRNA (cytosine(4447)-C(5))-methyltransferase OS=Homo sapiens GN=NOP2 PE=1 SV=1;sp|P46087|NOP2_HUMAN Probable 28S rRNA (cytosine(4447)-C(5))-methyltransferase OS=Homo sapiens GN=NOP2 PE=1 SV=2	5	5	5	5	1	1	3	1	2	1	0	4	2	1	1	3	1	2	1	0	4	2	1	1	3	1	2	1	0	4	2	7.7	7.7	7.7	94.095	855	855;812;159;177;275	0	12.651	By matching	By MS/MS	By MS/MS
A0A087WVC1;Q9BQ39	A0A087WVC1;Q9BQ39	3;3	2;2	2;2	ATP-dependent RNA helicase DDX50	DDX50	tr|A0A087WVC1|A0A087WVC1_HUMAN ATP-dependent RNA helicase DDX50 OS=Homo sapiens GN=DDX50 PE=1 SV=1;sp|Q9BQ39|DDX50_HUMAN ATP-dependent RNA helicase DDX50 OS=Homo sapiens GN=DDX50 PE=1 SV=1	2	3	2	2	3	2	3	3	1	2	3	2	2	2	1	2	2	0	1	2	1	1	2	1	2	2	0	1	2	1	1	6.4	4.4	4.4	82.226	730	730;737	0	3.6339	By MS/MS	By matching	By MS/MS
A0A087WVF7;Q9NZM3;E7EPJ2	A0A087WVF7;Q9NZM3;E7EPJ2	7;7;4	7;7;4	7;7;4	Intersectin-2	ITSN2	tr|A0A087WVF7|A0A087WVF7_HUMAN Intersectin-2 OS=Homo sapiens GN=ITSN2 PE=1 SV=1;sp|Q9NZM3|ITSN2_HUMAN Intersectin-2 OS=Homo sapiens GN=ITSN2 PE=1 SV=3;tr|E7EPJ2|E7EPJ2_HUMAN Intersectin-2 (Fragment) OS=Homo sapiens GN=ITSN2 PE=1 SV=1	3	7	7	7	6	4	3	6	4	5	4	5	7	6	4	3	6	4	5	4	5	7	6	4	3	6	4	5	4	5	7	5.1	5.1	5.1	191.6	1680	1680;1697;609	0	16.875	By MS/MS	By MS/MS	By MS/MS
A0A087WVQ6;Q00610;J3KS13;A0A087WX41;P53675;J3KRF5;K7EJJ5;J3KSQ2;F5H5N6	A0A087WVQ6;Q00610	15;15;5;5;5;2;2;1;1	15;15;5;5;5;2;2;1;1	15;15;5;5;5;2;2;1;1	Clathrin heavy chain;Clathrin heavy chain 1	CLTC	tr|A0A087WVQ6|A0A087WVQ6_HUMAN Clathrin heavy chain OS=Homo sapiens GN=CLTC PE=1 SV=1;sp|Q00610|CLH1_HUMAN Clathrin heavy chain 1 OS=Homo sapiens GN=CLTC PE=1 SV=5	9	15	15	15	6	8	13	10	10	8	8	14	8	6	8	13	10	10	8	8	14	8	6	8	13	10	10	8	8	14	8	10.7	10.7	10.7	192.06	1679	1679;1675;612;1260;1640;131;222;122;169	0	44.72	By MS/MS	By MS/MS	By MS/MS
A0A087WVV2;A0A0A0MRV0;Q9P2E9;F8W7S5;V9GY78;A0A087WU26	A0A087WVV2;A0A0A0MRV0;Q9P2E9;F8W7S5	5;5;5;4;1;1	5;5;5;4;1;1	5;5;5;4;1;1	Ribosome-binding protein 1	RRBP1	tr|A0A087WVV2|A0A087WVV2_HUMAN Ribosome-binding protein 1 OS=Homo sapiens GN=RRBP1 PE=1 SV=1;tr|A0A0A0MRV0|A0A0A0MRV0_HUMAN Ribosome-binding protein 1 OS=Homo sapiens GN=RRBP1 PE=1 SV=1;sp|Q9P2E9|RRBP1_HUMAN Ribosome-binding protein 1 OS=Homo sapiens GN=RR	6	5	5	5	1	2	3	3	1	2	1	2	0	1	2	3	3	1	2	1	2	0	1	2	3	3	1	2	1	2	0	7	7	7	102.77	934	934;1410;1410;751;229;346	0	8.4052	By matching	By MS/MS	By MS/MS
A0A087WWP4;Q96T37	A0A087WWP4;Q96T37	1;1	1;1	1;1	Putative RNA-binding protein 15	RBM15	tr|A0A087WWP4|A0A087WWP4_HUMAN Putative RNA-binding protein 15 OS=Homo sapiens GN=RBM15 PE=1 SV=1;sp|Q96T37|RBM15_HUMAN Putative RNA-binding protein 15 OS=Homo sapiens GN=RBM15 PE=1 SV=2	2	1	1	1	0	0	0	0	0	0	0	0	1	0	0	0	0	0	0	0	0	1	0	0	0	0	0	0	0	0	1	1.2	1.2	1.2	102.13	933	933;977	0.0043478	2.5814
I3L2Z5;A0A087WWR2;P56270;I3L411;H3BPU3;I3L4Y2;I3L0M3;H3BQS2;H3BQI4	I3L2Z5;A0A087WWR2;P56270;I3L411;H3BPU3;I3L4Y2;I3L0M3;H3BQS2;H3BQI4	2;2;2;1;1;1;1;1;1	2;2;2;1;1;1;1;1;1	2;2;2;1;1;1;1;1;1	Myc-associated zinc finger protein	MAZ	tr|I3L2Z5|I3L2Z5_HUMAN Myc-associated zinc finger protein (Fragment) OS=Homo sapiens GN=MAZ PE=1 SV=1;tr|A0A087WWR2|A0A087WWR2_HUMAN Myc-associated zinc finger protein OS=Homo sapiens GN=MAZ PE=1 SV=1;sp|P56270|MAZ_HUMAN Myc-associated zinc finger protein	9	2	2	2	2	2	2	2	2	2	2	2	2	2	2	2	2	2	2	2	2	2	2	2	2	2	2	2	2	2	2	15.8	15.8	15.8	22.187	202	202;252;477;53;78;79;94;152;196	0	4.2424	By matching	By matching	By MS/MS
A0A087WWU8;D6R904;K7EP68;D6RFM2;H0YL80	A0A087WWU8	22;9;6;4;4	1;1;1;0;1	0;0;0;0;0		TPM3	tr|A0A087WWU8|A0A087WWU8_HUMAN Tropomyosin alpha-3 chain OS=Homo sapiens GN=TPM3 PE=1 SV=1	5	22	1	0	21	19	20	22	20	21	18	21	21	1	1	1	1	1	1	1	1	1	0	0	0	0	0	0	0	0	0	69.6	5.7	0	26.42	227	227;95;138;49;68	0	3.2589	By matching	By MS/MS	By matching
A0A087WWY3;Q5HY54;Q60FE5;P21333	A0A087WWY3;Q5HY54;Q60FE5;P21333	3;3;3;3	2;2;2;2	2;2;2;2	Filamin-A	FLNA	tr|A0A087WWY3|A0A087WWY3_HUMAN Filamin-A OS=Homo sapiens GN=FLNA PE=1 SV=1;tr|Q5HY54|Q5HY54_HUMAN Filamin-A OS=Homo sapiens GN=FLNA PE=1 SV=1;tr|Q60FE5|Q60FE5_HUMAN Filamin A OS=Homo sapiens GN=FLNA PE=1 SV=1;sp|P21333|FLNA_HUMAN Filamin-A OS=Homo sapiens	4	3	2	2	3	2	2	3	2	2	2	3	3	2	1	1	2	1	1	1	2	2	2	1	1	2	1	1	1	2	2	1.9	1.4	1.4	245.85	2315	2315;2607;2620;2647	0	4.6445	By matching	By matching	By MS/MS
A0A087WX29;Q13148;A0A087WXQ5;K7EJM5;A0A087WV68;K7EN94;B1AKP7;G3V162;A0A087X260;A0A087WYY0;A0A087WW61;A0A087WX67;A0A087WXV3	A0A087WX29;Q13148;A0A087WXQ5;K7EJM5;A0A087WV68;K7EN94;B1AKP7;G3V162;A0A087X260;A0A087WYY0	3;3;2;2;2;2;2;2;2;2;1;1;1	3;3;2;2;2;2;2;2;2;2;1;1;1	3;3;2;2;2;2;2;2;2;2;1;1;1	TAR DNA-binding protein 43	TARDBP	tr|A0A087WX29|A0A087WX29_HUMAN TAR DNA-binding protein 43 (Fragment) OS=Homo sapiens GN=TARDBP PE=1 SV=1;sp|Q13148|TADBP_HUMAN TAR DNA-binding protein 43 OS=Homo sapiens GN=TARDBP PE=1 SV=1;tr|A0A087WXQ5|A0A087WXQ5_HUMAN TAR DNA-binding protein 43 (Fragmen	13	3	3	3	2	1	3	2	2	2	1	3	1	2	1	3	2	2	2	1	3	1	2	1	3	2	2	2	1	3	1	16	16	16	26.743	243	243;414;200;201;212;276;295;298;301;304;138;149;175	0	7.279	By matching	By matching	By MS/MS
A0A087WXD9;Q3V6T2	A0A087WXD9;Q3V6T2	1;1	1;1	1;1	Girdin	CCDC88A	tr|A0A087WXD9|A0A087WXD9_HUMAN Girdin OS=Homo sapiens GN=CCDC88A PE=1 SV=1;sp|Q3V6T2|GRDN_HUMAN Girdin OS=Homo sapiens GN=CCDC88A PE=1 SV=2	2	1	1	1	0	0	0	1	0	0	0	0	0	0	0	0	1	0	0	0	0	0	0	0	0	1	0	0	0	0	0	1.8	1.8	1.8	87.269	741	741;1871	0	4.0141
A0A087WYV3;E7EPF0;A0A0D9SEW3;A0A087WXF8;Q9NP64;A0A087WXU5	A0A087WYV3;E7EPF0;A0A0D9SEW3;A0A087WXF8;Q9NP64	3;3;3;3;3;1	3;3;3;3;3;1	3;3;3;3;3;1	Nucleolar protein of 40 kDa	ZCCHC17	tr|A0A087WYV3|A0A087WYV3_HUMAN Nucleolar protein of 40 kDa OS=Homo sapiens GN=ZCCHC17 PE=1 SV=1;tr|E7EPF0|E7EPF0_HUMAN Nucleolar protein of 40 kDa OS=Homo sapiens GN=ZCCHC17 PE=1 SV=2;tr|A0A0D9SEW3|A0A0D9SEW3_HUMAN Nucleolar protein of 40 kDa OS=Homo sapie	6	3	3	3	2	3	3	3	2	3	3	2	1	2	3	3	3	2	3	3	2	1	2	3	3	3	2	3	3	2	1	19.6	19.6	19.6	20.451	179	179;212;243;263;241;146	0	5.4256	By MS/MS	By MS/MS	By MS/MS
A0A087WXM6;J3QQT2;J3KRX5;A0A0A6YYL6;P18621;J3KRB3;A0A087WWH0;J3QS96;J3QLC8;A0A0A0MRF8;A0A087WY81;J3KSJ0	A0A087WXM6;J3QQT2;J3KRX5;A0A0A6YYL6;P18621;J3KRB3;A0A087WWH0;J3QS96;J3QLC8;A0A0A0MRF8;A0A087WY81	6;6;6;6;6;5;5;5;5;5;3;1	6;6;6;6;6;5;5;5;5;5;3;1	6;6;6;6;6;5;5;5;5;5;3;1	60S ribosomal protein L17	RPL17;RPL17-C18orf32	tr|A0A087WXM6|A0A087WXM6_HUMAN 60S ribosomal protein L17 (Fragment) OS=Homo sapiens GN=RPL17 PE=3 SV=1;tr|J3QQT2|J3QQT2_HUMAN 60S ribosomal protein L17 (Fragment) OS=Homo sapiens GN=RPL17 PE=3 SV=1;tr|J3KRX5|J3KRX5_HUMAN 60S ribosomal protein L17 (Fragment	12	6	6	6	5	5	5	5	5	5	6	5	4	5	5	5	5	5	5	6	5	4	5	5	5	5	5	5	6	5	4	39.6	39.6	39.6	19.586	169	169;171;174;228;184;129;132;138;174;190;98;56	0	25.784	By MS/MS	By MS/MS	By MS/MS
A0A087WXY2;B8QGS9;Q99959	A0A087WXY2;B8QGS9;Q99959	1;1;1	1;1;1	1;1;1	Plakophilin-2	PKP2	tr|A0A087WXY2|A0A087WXY2_HUMAN Plakophilin-2 (Fragment) OS=Homo sapiens GN=PKP2 PE=1 SV=1;tr|B8QGS9|B8QGS9_HUMAN Plakophilin-2 OS=Homo sapiens GN=PKP2 PE=1 SV=1;sp|Q99959|PKP2_HUMAN Plakophilin-2 OS=Homo sapiens GN=PKP2 PE=1 SV=2	3	1	1	1	1	1	0	1	1	1	1	1	1	1	1	0	1	1	1	1	1	1	1	1	0	1	1	1	1	1	1	30.6	30.6	30.6	3.7202	36	36;824;881	0.0027076	2.8743	By matching	By matching
A0A087WY03;E5RFV3	A0A087WY03;E5RFV3	3;3	3;3	3;3		SREK1	tr|A0A087WY03|A0A087WY03_HUMAN Splicing regulatory glutamine/lysine-rich protein 1 OS=Homo sapiens GN=SREK1 PE=1 SV=1;tr|E5RFV3|E5RFV3_HUMAN Splicing regulatory glutamine/lysine-rich protein 1 OS=Homo sapiens GN=SREK1 PE=1 SV=1	2	3	3	3	3	3	2	3	2	3	0	0	1	3	3	2	3	2	3	0	0	1	3	3	2	3	2	3	0	0	1	35	35	35	10.713	100	100;132	0	15.876	By MS/MS	By MS/MS	By MS/MS
A0A087WY55;Q9NP79;Q5TGM0	A0A087WY55;Q9NP79;Q5TGM0	2;2;1	2;2;1	2;2;1	Vacuolar protein sorting-associated protein VTA1 homolog	VTA1	tr|A0A087WY55|A0A087WY55_HUMAN Chromosome 6 open reading frame 55, isoform CRA_b OS=Homo sapiens GN=VTA1 PE=1 SV=1;sp|Q9NP79|VTA1_HUMAN Vacuolar protein sorting-associated protein VTA1 homolog OS=Homo sapiens GN=VTA1 PE=1 SV=1;tr|Q5TGM0|Q5TGM0_HUMAN Vacuol	3	2	2	2	2	1	1	1	2	1	1	2	2	2	1	1	1	2	1	1	2	2	2	1	1	1	2	1	1	2	2	12.1	12.1	12.1	31.102	280	280;307;249	0	3.8751	By MS/MS	By matching	By matching
D6RAW0;D6RFM0;D6RAH7;H9KV45;A0A0A0MQU3;A0A087WY85;P62837;P61077	D6RAW0;D6RFM0;D6RAH7;H9KV45;A0A0A0MQU3;A0A087WY85;P62837;P61077	1;1;1;1;1;1;1;1	1;1;1;1;1;1;1;1	1;1;1;1;1;1;1;1	Ubiquitin-conjugating enzyme E2 D2;Ubiquitin-conjugating enzyme E2 D3	UBE2D3;UBE2D2	tr|D6RAW0|D6RAW0_HUMAN Ubiquitin-conjugating enzyme E2 D3 (Fragment) OS=Homo sapiens GN=UBE2D3 PE=3 SV=1;tr|D6RFM0|D6RFM0_HUMAN Ubiquitin-conjugating enzyme E2 D2 (Fragment) OS=Homo sapiens GN=UBE2D2 PE=3 SV=1;tr|D6RAH7|D6RAH7_HUMAN Ubiquitin-conjugating e	8	1	1	1	1	1	1	1	1	1	1	1	1	1	1	1	1	1	1	1	1	1	1	1	1	1	1	1	1	1	1	15.3	15.3	15.3	8.2133	72	72;98;118;141;147;148;147;147	0.0035778	2.7578	By matching	By matching	By MS/MS
F2Z2I8;A0A087WYB4;Q9UJZ1	F2Z2I8;A0A087WYB4;Q9UJZ1	1;1;1	1;1;1	1;1;1	Stomatin-like protein 2, mitochondrial	STOML2	tr|F2Z2I8|F2Z2I8_HUMAN Stomatin-like protein 2, mitochondrial OS=Homo sapiens GN=STOML2 PE=1 SV=1;tr|A0A087WYB4|A0A087WYB4_HUMAN Stomatin-like protein 2, mitochondrial OS=Homo sapiens GN=STOML2 PE=1 SV=1;sp|Q9UJZ1|STML2_HUMAN Stomatin-like protein 2, mitoc	3	1	1	1	0	0	0	0	0	0	0	1	0	0	0	0	0	0	0	0	1	0	0	0	0	0	0	0	0	1	0	16.8	16.8	16.8	10.645	101	101;310;356	0	3.0916
A0A087WYR0;P09132;D6RBG4;A0A087WWU9	A0A087WYR0;P09132;D6RBG4;A0A087WWU9	2;2;1;1	2;2;1;1	2;2;1;1	Signal recognition particle 19 kDa protein	SRP19	tr|A0A087WYR0|A0A087WYR0_HUMAN Signal recognition particle 19 kDa protein OS=Homo sapiens GN=SRP19 PE=1 SV=1;sp|P09132|SRP19_HUMAN Signal recognition particle 19 kDa protein OS=Homo sapiens GN=SRP19 PE=1 SV=3;tr|D6RBG4|D6RBG4_HUMAN Uncharacterized protein	4	2	2	2	1	1	2	1	1	2	1	1	1	1	1	2	1	1	2	1	1	1	1	1	2	1	1	2	1	1	1	22.5	22.5	22.5	13.654	120	120;144;43;104	0	5.1769	By matching	By matching	By MS/MS
A0A087WZ51;A0A087WYR3;O43399	A0A087WZ51;A0A087WYR3;O43399	2;2;2	2;2;2	2;2;2	Tumor protein D54	TPD52L2	tr|A0A087WZ51|A0A087WZ51_HUMAN Tumor protein D54 OS=Homo sapiens GN=TPD52L2 PE=1 SV=1;tr|A0A087WYR3|A0A087WYR3_HUMAN Tumor protein D54 OS=Homo sapiens GN=TPD52L2 PE=1 SV=1;sp|O43399|TPD54_HUMAN Tumor protein D54 OS=Homo sapiens GN=TPD52L2 PE=1 SV=2	3	2	2	2	1	0	2	0	0	0	1	1	1	1	0	2	0	0	0	1	1	1	1	0	2	0	0	0	1	1	1	16.4	16.4	16.4	16.306	152	152;222;206	0	3.4224	By matching		By MS/MS
A0A087WYT3;Q15185;B4DDC6	A0A087WYT3;Q15185;B4DDC6	8;8;5	8;8;5	8;8;5	Prostaglandin E synthase 3	PTGES3	tr|A0A087WYT3|A0A087WYT3_HUMAN Prostaglandin E synthase 3 OS=Homo sapiens GN=PTGES3 PE=1 SV=1;sp|Q15185|TEBP_HUMAN Prostaglandin E synthase 3 OS=Homo sapiens GN=PTGES3 PE=1 SV=1;tr|B4DDC6|B4DDC6_HUMAN Prostaglandin E synthase 3 OS=Homo sapiens GN=PTGES3 PE	3	8	8	8	8	8	8	8	8	8	8	8	8	8	8	8	8	8	8	8	8	8	8	8	8	8	8	8	8	8	8	42.1	42.1	42.1	19.155	164	164;160;124	0	50.207	By MS/MS	By MS/MS	By MS/MS
A0A087WYY6;Q13835	A0A087WYY6;Q13835	7;7	7;7	7;7	Plakophilin-1	PKP1	tr|A0A087WYY6|A0A087WYY6_HUMAN Plakophilin-1 OS=Homo sapiens GN=PKP1 PE=1 SV=1;sp|Q13835|PKP1_HUMAN Plakophilin-1 OS=Homo sapiens GN=PKP1 PE=1 SV=2	2	7	7	7	5	5	6	2	3	5	6	6	3	5	5	6	2	3	5	6	6	3	5	5	6	2	3	5	6	6	3	11.7	11.7	11.7	80.532	725	725;747	0	27.926	By MS/MS	By MS/MS	By MS/MS
A0A087WZ40;Q14244	A0A087WZ40;Q14244	1;1	1;1	1;1	Ensconsin	MAP7	tr|A0A087WZ40|A0A087WZ40_HUMAN Ensconsin OS=Homo sapiens GN=MAP7 PE=1 SV=1;sp|Q14244|MAP7_HUMAN Ensconsin OS=Homo sapiens GN=MAP7 PE=1 SV=1	2	1	1	1	0	0	1	1	1	1	1	1	1	0	0	1	1	1	1	1	1	1	0	0	1	1	1	1	1	1	1	1.8	1.8	1.8	87.817	779	779;749	0.0094421	2.452			By matching
A0A087WZH7;P29966	A0A087WZH7;P29966	5;5	5;5	5;5	Myristoylated alanine-rich C-kinase substrate	MARCKS	tr|A0A087WZH7|A0A087WZH7_HUMAN Myristoylated alanine-rich C-kinase substrate OS=Homo sapiens GN=MARCKS PE=1 SV=1;sp|P29966|MARCS_HUMAN Myristoylated alanine-rich C-kinase substrate OS=Homo sapiens GN=MARCKS PE=1 SV=4	2	5	5	5	5	5	5	5	5	5	5	5	5	5	5	5	5	5	5	5	5	5	5	5	5	5	5	5	5	5	5	30.6	30.6	30.6	31.595	330	330;332	0	18.234	By MS/MS	By MS/MS	By MS/MS
A0A087WZK9;B3KS98;O15372;E5RHC7;E5RH59;E5RFW7;E5RFH0;E5RGU4;E5RJT0	A0A087WZK9;B3KS98;O15372;E5RHC7;E5RH59;E5RFW7;E5RFH0;E5RGU4;E5RJT0	2;2;2;1;1;1;1;1;1	2;2;2;1;1;1;1;1;1	2;2;2;1;1;1;1;1;1	Eukaryotic translation initiation factor 3 subunit H	EIF3H	tr|A0A087WZK9|A0A087WZK9_HUMAN Eukaryotic translation initiation factor 3 subunit H OS=Homo sapiens GN=EIF3H PE=1 SV=1;tr|B3KS98|B3KS98_HUMAN Eukaryotic translation initiation factor 3 subunit H OS=Homo sapiens GN=EIF3H PE=1 SV=1;sp|O15372|EIF3H_HUMAN Euka	9	2	2	2	1	1	2	1	1	1	1	1	1	1	1	2	1	1	1	1	1	1	1	1	2	1	1	1	1	1	1	9.5	9.5	9.5	39.589	349	349;366;352;46;56;97;170;235;244	0	4.884	By matching	By matching	By MS/MS
H3BV85;H3BTW0;A0A0B4J295;A0A087WZT3;H3BVE0;Q9H3K6	H3BV85;H3BTW0;A0A0B4J295;A0A087WZT3;H3BVE0;Q9H3K6	1;1;1;1;1;1	1;1;1;1;1;1	1;1;1;1;1;1	BolA-like protein 2	BOLA2B;BOLA2	tr|H3BV85|H3BV85_HUMAN BolA-like protein 2 (Fragment) OS=Homo sapiens GN=BOLA2B PE=1 SV=1;tr|H3BTW0|H3BTW0_HUMAN Uncharacterized protein (Fragment) OS=Homo sapiens PE=3 SV=1;tr|A0A0B4J295|A0A0B4J295_HUMAN Uncharacterized protein OS=Homo sapiens PE=3 SV=1;t	6	1	1	1	0	1	1	0	0	0	1	0	0	0	1	1	0	0	0	1	0	0	0	1	1	0	0	0	1	0	0	18.2	18.2	18.2	9.743	88	88;89;124;152;249;86	0	3.0444		By matching	By MS/MS
D6R9P3;D6RD18;D6RBZ0;A0A087WZV1;Q99729	D6R9P3;D6RD18;D6RBZ0;A0A087WZV1;Q99729	4;4;4;4;3	4;4;4;4;3	4;4;4;4;3	Heterogeneous nuclear ribonucleoprotein A/B	HNRNPAB	tr|D6R9P3|D6R9P3_HUMAN Heterogeneous nuclear ribonucleoprotein A/B OS=Homo sapiens GN=HNRNPAB PE=1 SV=1;tr|D6RD18|D6RD18_HUMAN Heterogeneous nuclear ribonucleoprotein A/B OS=Homo sapiens GN=HNRNPAB PE=1 SV=1;tr|D6RBZ0|D6RBZ0_HUMAN Heterogeneous nuclear rib	5	4	4	4	2	2	3	2	2	2	2	3	2	2	2	3	2	2	2	2	3	2	2	2	3	2	2	2	2	3	2	15.4	15.4	15.4	30.302	280	280;283;327;330;332	0	13.301	By MS/MS	By MS/MS	By MS/MS
A0A087X020;Q9Y3A5;F8WE72	A0A087X020;Q9Y3A5;F8WE72	6;6;3	6;6;3	6;6;3	Ribosome maturation protein SBDS	SBDS	tr|A0A087X020|A0A087X020_HUMAN Ribosome maturation protein SBDS OS=Homo sapiens GN=SBDS PE=1 SV=1;sp|Q9Y3A5|SBDS_HUMAN Ribosome maturation protein SBDS OS=Homo sapiens GN=SBDS PE=1 SV=4;tr|F8WE72|F8WE72_HUMAN Ribosome maturation protein SBDS OS=Homo sapien	3	6	6	6	5	4	6	5	5	5	5	6	5	5	4	6	5	5	5	5	6	5	5	4	6	5	5	5	5	6	5	28.4	28.4	28.4	28.864	250	250;250;86	0	16.237	By MS/MS	By MS/MS	By MS/MS
G3V153;A0A087X082;Q14444;E9PLA9	G3V153;A0A087X082;Q14444;E9PLA9	2;2;2;1	2;2;2;1	2;2;2;1	Caprin-1	CAPRIN1	tr|G3V153|G3V153_HUMAN Caprin-1 OS=Homo sapiens GN=CAPRIN1 PE=1 SV=1;tr|A0A087X082|A0A087X082_HUMAN Caprin-1 OS=Homo sapiens GN=CAPRIN1 PE=1 SV=1;sp|Q14444|CAPR1_HUMAN Caprin-1 OS=Homo sapiens GN=CAPRIN1 PE=1 SV=2;tr|E9PLA9|E9PLA9_HUMAN Caprin-1 (Fragment)	4	2	2	2	0	0	2	2	1	1	1	2	1	0	0	2	2	1	1	1	2	1	0	0	2	2	1	1	1	2	1	4	4	4	70.353	628	628;649;709;186	0	4.1502			By MS/MS
A0A087X0K9;G5E9E7;G3V1L9;Q07157;H0YKB1;H0YLT6	A0A087X0K9;G5E9E7;G3V1L9;Q07157;H0YKB1	3;3;3;3;2;1	3;3;3;3;2;1	3;3;3;3;2;1	Tight junction protein ZO-1	TJP1	tr|A0A087X0K9|A0A087X0K9_HUMAN Tight junction protein ZO-1 OS=Homo sapiens GN=TJP1 PE=1 SV=1;tr|G5E9E7|G5E9E7_HUMAN Tight junction protein 1 (Zona occludens 1), isoform CRA_e OS=Homo sapiens GN=TJP1 PE=1 SV=1;tr|G3V1L9|G3V1L9_HUMAN Tight junction protein 1	6	3	3	3	1	2	1	0	2	0	1	1	1	1	2	1	0	2	0	1	1	1	1	2	1	0	2	0	1	1	1	2.2	2.2	2.2	187.85	1676	1676;1692;1768;1748;383;231	0	7.5205	By MS/MS	By MS/MS	By matching
A0A087X0X3;P52272;M0QZM1;M0R019;M0R2T0;M0R2I7;M0R0Y6;M0QYQ7;M0R0N3;M0QY96;M0QYL3	A0A087X0X3;P52272;M0QZM1	15;15;8;6;6;5;3;3;3;2;1	15;15;8;6;6;5;3;3;3;2;1	15;15;8;6;6;5;3;3;3;2;1	Heterogeneous nuclear ribonucleoprotein M	HNRNPM	tr|A0A087X0X3|A0A087X0X3_HUMAN Heterogeneous nuclear ribonucleoprotein M OS=Homo sapiens GN=HNRNPM PE=1 SV=1;sp|P52272|HNRPM_HUMAN Heterogeneous nuclear ribonucleoprotein M OS=Homo sapiens GN=HNRNPM PE=1 SV=3;tr|M0QZM1|M0QZM1_HUMAN Heterogeneous nuclear ri	11	15	15	15	10	8	15	12	5	7	9	13	11	10	8	15	12	5	7	9	13	11	10	8	15	12	5	7	9	13	11	24.2	24.2	24.2	77.569	730	730;730;383;353;357;214;99;219;276;116;99	0	56.081	By MS/MS	By MS/MS	By MS/MS
A0A087X1A5;Q5JW30;O95793;F6UDC6;Q5JW28	A0A087X1A5;Q5JW30;O95793	4;4;4;1;1	2;2;2;1;1	2;2;2;1;1	Double-stranded RNA-binding protein Staufen homolog 1	STAU1	tr|A0A087X1A5|A0A087X1A5_HUMAN Double-stranded RNA-binding protein Staufen homolog 1 OS=Homo sapiens GN=STAU1 PE=1 SV=1;tr|Q5JW30|Q5JW30_HUMAN Double-stranded RNA-binding protein Staufen homolog 1 OS=Homo sapiens GN=STAU1 PE=1 SV=1;sp|O95793|STAU1_HUMAN Do	5	4	2	2	2	2	4	3	1	2	2	4	3	1	1	2	1	0	1	1	2	1	1	1	2	1	0	1	1	2	1	7.7	4.7	4.7	54.945	493	493;494;577;129;199	0	4.5433	By matching	By MS/MS	By MS/MS
A0A087X1B7;X6R700;Q9Y3Y2;Q5T7Y7	A0A087X1B7;X6R700;Q9Y3Y2;Q5T7Y7	2;2;2;1	2;2;2;1	2;2;2;1	Chromatin target of PRMT1 protein	CHTOP	tr|A0A087X1B7|A0A087X1B7_HUMAN Chromatin target of PRMT1 protein OS=Homo sapiens GN=CHTOP PE=1 SV=1;tr|X6R700|X6R700_HUMAN Chromatin target of PRMT1 protein OS=Homo sapiens GN=CHTOP PE=1 SV=1;sp|Q9Y3Y2|CHTOP_HUMAN Chromatin target of PRMT1 protein OS=Homo	4	2	2	2	2	1	1	1	1	1	1	1	1	2	1	1	1	1	1	1	1	1	2	1	1	1	1	1	1	1	1	38.2	38.2	38.2	8.5199	76	76;223;248;101	0	7.7014	By MS/MS	By MS/MS	By MS/MS
A0A087X295;Q9NNW5;E9PDU5;E9PBK6;E5RFX3;F8WE36;C9K020;Q6PKC6	A0A087X295;Q9NNW5;E9PDU5;E9PBK6	4;4;3;2;1;1;1;1	4;4;3;2;1;1;1;1	4;4;3;2;1;1;1;1	WD repeat-containing protein 6	WDR6	tr|A0A087X295|A0A087X295_HUMAN WD repeat-containing protein 6 OS=Homo sapiens GN=WDR6 PE=1 SV=1;sp|Q9NNW5|WDR6_HUMAN WD repeat-containing protein 6 OS=Homo sapiens GN=WDR6 PE=1 SV=1;tr|E9PDU5|E9PDU5_HUMAN WD repeat-containing protein 6 OS=Homo sapiens GN=W	8	4	4	4	4	4	4	3	3	4	4	4	3	4	4	4	3	3	4	4	4	3	4	4	4	3	3	4	4	4	3	6.3	6.3	6.3	125	1151	1151;1121;1070;569;61;68;271;289	0	13.214	By MS/MS	By MS/MS	By MS/MS
A0A087X2D8;O60271;H0YBE9	A0A087X2D8;O60271	3;3;1	3;3;1	3;3;1	C-Jun-amino-terminal kinase-interacting protein 4	SPAG9	tr|A0A087X2D8|A0A087X2D8_HUMAN C-Jun-amino-terminal kinase-interacting protein 4 OS=Homo sapiens GN=SPAG9 PE=1 SV=1;sp|O60271|JIP4_HUMAN C-Jun-amino-terminal kinase-interacting protein 4 OS=Homo sapiens GN=SPAG9 PE=1 SV=4	3	3	3	3	0	0	0	1	3	1	1	0	0	0	0	0	1	3	1	1	0	0	0	0	0	1	3	1	1	0	0	2.6	2.6	2.6	145.17	1312	1312;1321;174	0	4.6948
F1T0B3;A0A087X2G1;Q92499	F1T0B3;A0A087X2G1;Q92499	5;5;5	5;5;5	5;5;5	ATP-dependent RNA helicase DDX1	DDX1	tr|F1T0B3|F1T0B3_HUMAN ATP-dependent RNA helicase DDX1 OS=Homo sapiens GN=DDX1 PE=1 SV=1;tr|A0A087X2G1|A0A087X2G1_HUMAN ATP-dependent RNA helicase DDX1 OS=Homo sapiens GN=DDX1 PE=1 SV=1;sp|Q92499|DDX1_HUMAN ATP-dependent RNA helicase DDX1 OS=Homo sapiens G	3	5	5	5	2	3	4	2	4	5	4	4	3	2	3	4	2	4	5	4	4	3	2	3	4	2	4	5	4	4	3	8.2	8.2	8.2	73.915	659	659;659;740	0	12.197	By MS/MS	By MS/MS	By MS/MS
A0A096LPH6;Q14966;A0A096LNR2;A0A096LNX0;A0A096LPI0;A0A096LNQ0;A0A096LPB4;C9JWN0	A0A096LPH6;Q14966	4;4;1;1;1;1;1;1	4;4;1;1;1;1;1;1	4;4;1;1;1;1;1;1	Zinc finger protein 638	ZNF638	tr|A0A096LPH6|A0A096LPH6_HUMAN Zinc finger protein 638 OS=Homo sapiens GN=ZNF638 PE=1 SV=1;sp|Q14966|ZN638_HUMAN Zinc finger protein 638 OS=Homo sapiens GN=ZNF638 PE=1 SV=2	8	4	4	4	1	3	3	2	0	1	0	1	1	1	3	3	2	0	1	0	1	1	1	3	3	2	0	1	0	1	1	5.6	5.6	5.6	104.05	918	918;1978;90;98;153;171;184;197	0	6.2263	By matching	By MS/MS	By MS/MS
F5H0Q6;A0A0A0MQS2;Q8N2M8;K7EM61;K7EKC9;K7EKR8;K7EP11;Q8WXD2	F5H0Q6;A0A0A0MQS2;Q8N2M8	15;15;14;4;3;1;1;1	15;15;14;4;3;1;1;1	15;15;14;4;3;1;1;1	CLK4-associating serine/arginine rich protein	CLASRP	tr|F5H0Q6|F5H0Q6_HUMAN CLK4-associating serine/arginine-rich protein OS=Homo sapiens GN=CLASRP PE=1 SV=2;tr|A0A0A0MQS2|A0A0A0MQS2_HUMAN CLK4-associating serine/arginine-rich protein OS=Homo sapiens GN=CLASRP PE=1 SV=1;sp|Q8N2M8|CLASR_HUMAN CLK4-associating	8	15	15	15	15	15	14	15	15	15	11	13	15	15	15	14	15	15	15	11	13	15	15	15	14	15	15	15	11	13	15	22.3	22.3	22.3	74.824	655	655;674;674;188;86;81;131;468	0	77.851	By MS/MS	By MS/MS	By MS/MS
A0A0A0MQV9;Q9UPS6	A0A0A0MQV9;Q9UPS6	5;5	4;4	4;4	Histone-lysine N-methyltransferase;Histone-lysine N-methyltransferase SETD1B	SETD1B	tr|A0A0A0MQV9|A0A0A0MQV9_HUMAN Histone-lysine N-methyltransferase SETD1B OS=Homo sapiens GN=SETD1B PE=1 SV=1;sp|Q9UPS6|SET1B_HUMAN Histone-lysine N-methyltransferase SETD1B OS=Homo sapiens GN=SETD1B PE=1 SV=3	2	5	4	4	4	2	4	3	4	3	3	3	3	3	1	3	2	3	2	3	2	2	3	1	3	2	3	2	3	2	2	3.2	2.7	2.7	208.77	1923	1923;1966	0	17.555	By MS/MS	By MS/MS	By MS/MS
A0A0A0MR02;P45880;A2A3S1;Q5JSD2;Q5JSD1	A0A0A0MR02;P45880	3;3;1;1;1	3;3;1;1;1	3;3;1;1;1	Voltage-dependent anion-selective channel protein 2	VDAC2	tr|A0A0A0MR02|A0A0A0MR02_HUMAN Voltage-dependent anion-selective channel protein 2 (Fragment) OS=Homo sapiens GN=VDAC2 PE=1 SV=1;sp|P45880|VDAC2_HUMAN Voltage-dependent anion-selective channel protein 2 OS=Homo sapiens GN=VDAC2 PE=1 SV=2	5	3	3	3	1	1	3	2	2	3	2	3	1	1	1	3	2	2	3	2	3	1	1	1	3	2	2	3	2	3	1	15.2	15.2	15.2	30.348	282	282;294;109;195;204	0	10.677	By MS/MS	By matching	By MS/MS
A8K968;A0A0A0MRA8;Q9Y2J2;A0A0J9YY18	A8K968;A0A0A0MRA8;Q9Y2J2	4;4;4;1	1;1;1;1	1;1;1;1	Band 4.1-like protein 3;Band 4.1-like protein 3, N-terminally processed	EPB41L3	tr|A8K968|A8K968_HUMAN Band 4.1-like protein 3 OS=Homo sapiens GN=EPB41L3 PE=1 SV=1;tr|A0A0A0MRA8|A0A0A0MRA8_HUMAN Band 4.1-like protein 3 OS=Homo sapiens GN=EPB41L3 PE=1 SV=1;sp|Q9Y2J2|E41L3_HUMAN Band 4.1-like protein 3 OS=Homo sapiens GN=EPB41L3 PE=1 SV	4	4	1	1	1	1	1	2	4	4	4	1	0	0	1	0	0	1	1	1	0	0	0	1	0	0	1	1	1	0	0	5.6	1.7	1.7	84.711	756	756;918;1087;325	0	6.0521	By matching	By MS/MS	By matching
A0A0A0MRI1;Q8IXQ4	A0A0A0MRI1;Q8IXQ4	2;2	2;2	2;2	GPALPP motifs-containing protein 1	GPALPP1	tr|A0A0A0MRI1|A0A0A0MRI1_HUMAN GPALPP motifs-containing protein 1 OS=Homo sapiens GN=GPALPP1 PE=1 SV=1;sp|Q8IXQ4|GPAM1_HUMAN GPALPP motifs-containing protein 1 OS=Homo sapiens GN=GPALPP1 PE=1 SV=1	2	2	2	2	1	2	2	2	2	2	1	2	2	1	2	2	2	2	2	1	2	2	1	2	2	2	2	2	1	2	2	6.5	6.5	6.5	37.971	338	338;340	0	6.4994	By matching	By MS/MS	By MS/MS
A0A0A0MRI2;Q9UNH7;G3V5X9	A0A0A0MRI2;Q9UNH7;G3V5X9	6;6;4	5;5;3	5;5;3	Sorting nexin-6;Sorting nexin-6, N-terminally processed	SNX6	tr|A0A0A0MRI2|A0A0A0MRI2_HUMAN Sorting nexin 6, isoform CRA_b OS=Homo sapiens GN=SNX6 PE=1 SV=1;sp|Q9UNH7|SNX6_HUMAN Sorting nexin-6 OS=Homo sapiens GN=SNX6 PE=1 SV=1;tr|G3V5X9|G3V5X9_HUMAN Sorting nexin-6 (Fragment) OS=Homo sapiens GN=SNX6 PE=1 SV=1	3	6	5	5	5	4	4	4	6	4	5	6	4	4	3	3	3	5	3	4	5	3	4	3	3	3	5	3	4	5	3	16.5	14.1	14.1	47.804	418	418;406;239	0	12.655	By MS/MS	By MS/MS	By MS/MS
F6S8N6;A0A0A0MRJ6;H7BY58;P22061	F6S8N6;A0A0A0MRJ6;H7BY58;P22061	2;2;2;2	2;2;2;2	2;2;2;2	Protein-L-isoaspartate O-methyltransferase;Protein-L-isoaspartate(D-aspartate) O-methyltransferase	PCMT1	tr|F6S8N6|F6S8N6_HUMAN Protein-L-isoaspartate(D-aspartate) O-methyltransferase OS=Homo sapiens GN=PCMT1 PE=1 SV=1;tr|A0A0A0MRJ6|A0A0A0MRJ6_HUMAN Protein-L-isoaspartate O-methyltransferase OS=Homo sapiens GN=PCMT1 PE=1 SV=1;tr|H7BY58|H7BY58_HUMAN Protein-L-	4	2	2	2	2	1	2	2	2	1	1	2	1	2	1	2	2	2	1	1	2	1	2	1	2	2	2	1	1	2	1	21.2	21.2	21.2	26.626	250	250;285;286;227	0	4.5995	By matching	By matching	By matching
H0Y7N6;F6XFR5;J3QSX6;F8W8M4;A0A0A0MRL6;O14639	H0Y7N6;F6XFR5;J3QSX6;F8W8M4;A0A0A0MRL6;O14639	2;2;2;2;2;2	2;2;2;2;2;2	2;2;2;2;2;2	Actin-binding LIM protein 1	ABLIM1	tr|H0Y7N6|H0Y7N6_HUMAN Actin-binding LIM protein 1 (Fragment) OS=Homo sapiens GN=ABLIM1 PE=1 SV=1;tr|F6XFR5|F6XFR5_HUMAN Actin-binding LIM protein 1 (Fragment) OS=Homo sapiens GN=ABLIM1 PE=1 SV=1;tr|J3QSX6|J3QSX6_HUMAN Actin-binding LIM protein 1 OS=Homo s	6	2	2	2	2	1	0	1	1	2	0	1	2	2	1	0	1	1	2	0	1	2	2	1	0	1	1	2	0	1	2	13.4	13.4	13.4	19.642	172	172;173;401;718;746;778	0	3.1317	By matching	By matching
A0A0A0MRM8;A0A0D9SGC1;E7EW20;Q9UM54	A0A0A0MRM8;A0A0D9SGC1;E7EW20;Q9UM54	2;2;2;2	2;2;2;2	2;2;2;2	Unconventional myosin-VI	MYO6	tr|A0A0A0MRM8|A0A0A0MRM8_HUMAN Unconventional myosin-VI OS=Homo sapiens GN=MYO6 PE=1 SV=1;tr|A0A0D9SGC1|A0A0D9SGC1_HUMAN Unconventional myosin-VI OS=Homo sapiens GN=MYO6 PE=1 SV=1;tr|E7EW20|E7EW20_HUMAN Unconventional myosin-VI OS=Homo sapiens GN=MYO6 PE=1	4	2	2	2	1	1	2	1	0	0	0	1	0	1	1	2	1	0	0	0	1	0	1	1	2	1	0	0	0	1	0	2.2	2.2	2.2	145.01	1253	1253;1294;1295;1294	0	3.6823	By matching	By matching	By MS/MS
A0A0A0MRM9;Q14978;S4R349;S4R3C2;S4R402;S4R341	A0A0A0MRM9;Q14978	28;26;9;5;1;1	28;26;9;5;1;1	28;26;9;5;1;1	Nucleolar and coiled-body phosphoprotein 1	NOLC1	tr|A0A0A0MRM9|A0A0A0MRM9_HUMAN Nucleolar and coiled-body phosphoprotein 1 (Fragment) OS=Homo sapiens GN=NOLC1 PE=1 SV=1;sp|Q14978|NOLC1_HUMAN Nucleolar and coiled-body phosphoprotein 1 OS=Homo sapiens GN=NOLC1 PE=1 SV=2	6	28	28	28	28	28	27	28	28	28	26	28	28	28	28	27	28	28	28	26	28	28	28	28	27	28	28	28	26	28	28	29.9	29.9	29.9	74.543	708	708;699;258;281;46;73	0	128.63	By MS/MS	By MS/MS	By MS/MS
A0A0A0MRR7;P09234	A0A0A0MRR7;P09234	2;2	2;2	2;2	U1 small nuclear ribonucleoprotein C	SNRPC	tr|A0A0A0MRR7|A0A0A0MRR7_HUMAN U1 small nuclear ribonucleoprotein C OS=Homo sapiens GN=SNRPC PE=1 SV=1;sp|P09234|RU1C_HUMAN U1 small nuclear ribonucleoprotein C OS=Homo sapiens GN=SNRPC PE=1 SV=1	2	2	2	2	2	2	2	2	2	1	2	1	2	2	2	2	2	2	1	2	1	2	2	2	2	2	2	1	2	1	2	16.7	16.7	16.7	19.687	180	180;159	0	6.4623	By matching	By MS/MS	By MS/MS
J3KNW4;A0A0A0MSG2;Q14192	J3KNW4;A0A0A0MSG2;Q14192	2;2;2	2;2;2	2;2;2	Four and a half LIM domains protein 2	FHL2	tr|J3KNW4|J3KNW4_HUMAN Four and a half LIM domains protein 2 OS=Homo sapiens GN=FHL2 PE=1 SV=1;tr|A0A0A0MSG2|A0A0A0MSG2_HUMAN Four and a half LIM domains protein 2 OS=Homo sapiens GN=FHL2 PE=1 SV=1;sp|Q14192|FHL2_HUMAN Four and a half LIM domains protein 2	3	2	2	2	1	0	0	1	1	0	2	1	1	1	0	0	1	1	0	2	1	1	1	0	0	1	1	0	2	1	1	5.4	5.4	5.4	44.205	389	389;395;279	0	3.7567	By matching
A0A0A0MSQ0;P13797;U3KQI3;H7C4N2;Q5TBN3;P13796	A0A0A0MSQ0;P13797	8;8;3;2;2;2	8;8;3;2;2;2	8;8;3;2;2;2	Plastin-3	PLS3	tr|A0A0A0MSQ0|A0A0A0MSQ0_HUMAN Plastin-3 OS=Homo sapiens GN=PLS3 PE=1 SV=1;sp|P13797|PLST_HUMAN Plastin-3 OS=Homo sapiens GN=PLS3 PE=1 SV=4	6	8	8	8	4	4	7	7	7	3	6	5	5	4	4	7	7	7	3	6	5	5	4	4	7	7	7	3	6	5	5	19.6	19.6	19.6	69.334	617	617;630;164;190;246;627	0	27.564	By MS/MS	By MS/MS	By MS/MS
B3KYB6;A0A0A0MSW4;P48739	B3KYB6;A0A0A0MSW4;P48739	1;1;1	1;1;1	1;1;1	Phosphatidylinositol transfer protein beta isoform	PITPNB	tr|B3KYB6|B3KYB6_HUMAN Phosphatidylinositol transfer protein beta isoform (Fragment) OS=Homo sapiens GN=PITPNB PE=1 SV=1;tr|A0A0A0MSW4|A0A0A0MSW4_HUMAN Phosphatidylinositol transfer protein beta isoform OS=Homo sapiens GN=PITPNB PE=1 SV=1;sp|P48739|PIPNB_H	3	1	1	1	1	1	1	1	1	1	1	1	1	1	1	1	1	1	1	1	1	1	1	1	1	1	1	1	1	1	1	10	10	10	13.781	120	120;271;271	0	4.006	By MS/MS	By MS/MS	By matching
J3KR24;A0A0A0MSX9;P41252	J3KR24;A0A0A0MSX9;P41252	5;5;5	5;5;5	5;5;5	Isoleucine--tRNA ligase, cytoplasmic	IARS	tr|J3KR24|J3KR24_HUMAN Isoleucine--tRNA ligase, cytoplasmic OS=Homo sapiens GN=IARS PE=1 SV=1;tr|A0A0A0MSX9|A0A0A0MSX9_HUMAN Isoleucine--tRNA ligase, cytoplasmic OS=Homo sapiens GN=IARS PE=1 SV=1;sp|P41252|SYIC_HUMAN Isoleucine--tRNA ligase, cytoplasmic OS	3	5	5	5	1	1	5	3	0	2	1	3	0	1	1	5	3	0	2	1	3	0	1	1	5	3	0	2	1	3	0	5.7	5.7	5.7	131.76	1152	1152;1242;1262	0	11.419	By matching	By matching	By MS/MS
A0A0A0MT33;Q9UPN6	A0A0A0MT33;Q9UPN6	9;9	9;9	7;7	Protein SCAF8	SCAF8	tr|A0A0A0MT33|A0A0A0MT33_HUMAN Protein SCAF8 OS=Homo sapiens GN=SCAF8 PE=1 SV=1;sp|Q9UPN6|SCAF8_HUMAN Protein SCAF8 OS=Homo sapiens GN=SCAF8 PE=1 SV=1	2	9	9	7	5	4	5	6	6	5	7	5	5	5	4	5	6	6	5	7	5	5	3	3	4	4	4	3	5	4	4	8.5	8.5	7.1	148.86	1349	1349;1271	0	21.068	By MS/MS	By MS/MS	By MS/MS
Q9HBD4;A0A0A0MT49;P51532;A0A0U1RRF5;K7EP28;A0A0U1RRD6;A0A0U1RRF8;A0A0A0MSS5;F6UH26;A0A0U1RQU0;A0A0U1RR09;F6XE55;A0A0U1RQW7;A0A0U1RRN2;B1ALG1;A0A0U1RR83;A0A0U1RQX3;F6T8Q0;B1ALG2;A0A0U1RR26;A0A0U1RRG6;B4DNT1;B1ALF6;F6VDE0;P51531	Q9HBD4;A0A0A0MT49;P51532;A0A0U1RRF5;K7EP28;A0A0U1RRD6;A0A0U1RRF8;A0A0A0MSS5;F6UH26;A0A0U1RQU0;A0A0U1RR09;F6XE55;A0A0U1RQW7;A0A0U1RRN2;B1ALG1;A0A0U1RR83;A0A0U1RQX3;F6T8Q0;B1ALG2;A0A0U1RR26;A0A0U1RRG6;B4DNT1;B1ALF6;F6VDE0;P51531	2;2;2;1;1;1;1;1;1;1;1;1;1;1;1;1;1;1;1;1;1;1;1;1;1	2;2;2;1;1;1;1;1;1;1;1;1;1;1;1;1;1;1;1;1;1;1;1;1;1	2;2;2;1;1;1;1;1;1;1;1;1;1;1;1;1;1;1;1;1;1;1;1;1;1	Transcription activator BRG1;Probable global transcription activator SNF2L2	SMARCA4;SMARCA2	tr|Q9HBD4|Q9HBD4_HUMAN SMARCA4 isoform 2 OS=Homo sapiens GN=SMARCA4 PE=1 SV=1;tr|A0A0A0MT49|A0A0A0MT49_HUMAN Transcription activator BRG1 OS=Homo sapiens GN=SMARCA4 PE=1 SV=1;sp|P51532|SMCA4_HUMAN Transcription activator BRG1 OS=Homo sapiens GN=SMARCA4 PE=	25	2	2	2	0	0	2	1	1	1	0	2	1	0	0	2	1	1	1	0	2	1	0	0	2	1	1	1	0	2	1	1.5	1.5	1.5	188.15	1679	1679;1681;1647;38;136;149;169;183;192;200;202;228;229;232;236;244;245;248;254;260;270;276;278;1514;1590	0	8.2069			By MS/MS
B7Z4S1;Q5JRI7;A0A0A0MT58;Q15560;P23193	B7Z4S1;Q5JRI7;A0A0A0MT58;Q15560;P23193	1;1;1;1;1	1;1;1;1;1	1;1;1;1;1	Transcription elongation factor A protein 2;Transcription elongation factor A protein 1	TCEA1;TCEA2	tr|B7Z4S1|B7Z4S1_HUMAN Transcription elongation factor A protein 1 OS=Homo sapiens GN=TCEA1 PE=1 SV=1;tr|Q5JRI7|Q5JRI7_HUMAN Transcription elongation factor A protein 2 (Fragment) OS=Homo sapiens GN=TCEA2 PE=1 SV=1;tr|A0A0A0MT58|A0A0A0MT58_HUMAN Transcript	5	1	1	1	0	0	1	1	0	0	0	1	1	0	0	1	1	0	0	0	1	1	0	0	1	1	0	0	0	1	1	11.1	11.1	11.1	13.445	117	117;246;270;299;301	0	3.0998			By MS/MS
E5RJN7;A0A0A0MTC4;A0A0A0MTD1;F8VPI7;E7EPX0;A0A0A0MTC6;E7EVJ4;E9PH62;A0A0A0MTC5;Q9NUL3;G5EA18;E7EVI1;E5RJ67;H0YBY0;E5RFK1	E5RJN7;A0A0A0MTC4;A0A0A0MTD1;F8VPI7;E7EPX0;A0A0A0MTC6;E7EVJ4;E9PH62;A0A0A0MTC5;Q9NUL3;G5EA18;E7EVI1;E5RJ67	11;11;11;11;11;11;11;11;11;11;10;7;6;4;1	11;11;11;11;11;11;11;11;11;11;10;7;6;4;1	9;9;9;9;9;9;9;9;9;9;8;5;6;4;1	Double-stranded RNA-binding protein Staufen homolog 2	STAU2	tr|E5RJN7|E5RJN7_HUMAN Double-stranded RNA-binding protein Staufen homolog 2 (Fragment) OS=Homo sapiens GN=STAU2 PE=1 SV=1;tr|A0A0A0MTC4|A0A0A0MTC4_HUMAN Double-stranded RNA-binding protein Staufen homolog 2 OS=Homo sapiens GN=STAU2 PE=1 SV=1;tr|A0A0A0MTD1	15	11	11	9	7	7	8	8	6	7	6	7	8	7	7	8	8	6	7	6	7	8	6	6	6	6	5	6	5	5	6	40	40	35.3	34.861	320	320;398;473;479;491;504;511;538;570;570;291;390;135;162;204	0	39.002	By MS/MS	By MS/MS	By MS/MS
A0A0A0MTH3;Q13418	A0A0A0MTH3;Q13418	2;2	2;2	2;2	Integrin-linked protein kinase	ILK	tr|A0A0A0MTH3|A0A0A0MTH3_HUMAN Integrin-linked protein kinase OS=Homo sapiens GN=ILK PE=1 SV=1;sp|Q13418|ILK_HUMAN Integrin-linked protein kinase OS=Homo sapiens GN=ILK PE=1 SV=2	2	2	2	2	1	1	1	2	2	2	2	2	1	1	1	1	2	2	2	2	2	1	1	1	1	2	2	2	2	2	1	5.2	5.2	5.2	54.611	483	483;452	0	4.8726	By MS/MS	By MS/MS	By MS/MS
B8ZWD1;A0A0A0MTI5;P07108	B8ZWD1;A0A0A0MTI5;P07108	3;3;3	3;3;3	3;3;3	Acyl-CoA-binding protein	DBI	tr|B8ZWD1|B8ZWD1_HUMAN Acyl-CoA-binding protein OS=Homo sapiens GN=DBI PE=1 SV=1;tr|A0A0A0MTI5|A0A0A0MTI5_HUMAN Acyl-CoA-binding protein OS=Homo sapiens GN=DBI PE=1 SV=1;sp|P07108|ACBP_HUMAN Acyl-CoA-binding protein OS=Homo sapiens GN=DBI PE=1 SV=2	3	3	3	3	2	1	2	2	2	3	2	2	2	2	1	2	2	2	3	2	2	2	2	1	2	2	2	3	2	2	2	45.4	45.4	45.4	11.15	97	97;143;87	0	8.6415	By MS/MS	By matching	By MS/MS
K7EQ48;A0A0A0MTS2;P06744;A0A0J9YXP8;A0A0J9YX90;A0A0J9YYH3;K7EPY4;K7EP41;K7ELR7;K7ENA0;K7EIL4;K7ERK8;K7ERC6;K7ESF4;CON__Q3ZBD7;Q8N196	K7EQ48;A0A0A0MTS2;P06744;A0A0J9YXP8;A0A0J9YX90;A0A0J9YYH3	9;9;9;7;7;7;4;3;2;2;1;1;1;1;1;1	9;9;9;7;7;7;4;3;2;2;1;1;1;1;1;1	9;9;9;7;7;7;4;3;2;2;1;1;1;1;1;1	Glucose-6-phosphate isomerase	GPI	tr|K7EQ48|K7EQ48_HUMAN Glucose-6-phosphate isomerase OS=Homo sapiens GN=GPI PE=1 SV=2;tr|A0A0A0MTS2|A0A0A0MTS2_HUMAN Glucose-6-phosphate isomerase (Fragment) OS=Homo sapiens GN=GPI PE=1 SV=1;sp|P06744|G6PI_HUMAN Glucose-6-phosphate isomerase OS=Homo sapien	16	9	9	9	6	4	9	7	5	7	8	8	5	6	4	9	7	5	7	8	8	5	6	4	9	7	5	7	8	8	5	21.5	21.5	21.5	53.401	474	474;573;558;268;279;283;167;159;146;163;110;133;162;209;557;739	0	28.487	By MS/MS	By MS/MS	By MS/MS
A0A0A6YY92;P30566;B4DEP1;A0A096LP72;A0A096LNY4;A0A096LNY5;A0A096LNY6	A0A0A6YY92;P30566;B4DEP1;A0A096LP72;A0A096LNY4;A0A096LNY5;A0A096LNY6	2;2;1;1;1;1;1	2;2;1;1;1;1;1	2;2;1;1;1;1;1	Adenylosuccinate lyase	ADSL	tr|A0A0A6YY92|A0A0A6YY92_HUMAN Adenylosuccinate lyase OS=Homo sapiens GN=ADSL PE=1 SV=1;sp|P30566|PUR8_HUMAN Adenylosuccinate lyase OS=Homo sapiens GN=ADSL PE=1 SV=2;tr|B4DEP1|B4DEP1_HUMAN Adenylosuccinate lyase OS=Homo sapiens GN=ADSL PE=1 SV=1;tr|A0A096L	7	2	2	2	2	1	2	2	2	2	1	2	1	2	1	2	2	2	2	1	2	1	2	1	2	2	2	2	1	2	1	4.8	4.8	4.8	56.216	498	498;484;127;149;164;262;360	0	7.3985	By MS/MS	By MS/MS	By MS/MS
A0A0A6YYG5;Q53S48;P52655;Q9UNN4	A0A0A6YYG5;Q53S48;P52655;Q9UNN4	1;1;1;1	1;1;1;1	1;1;1;1	Transcription initiation factor IIA subunit 1;Transcription initiation factor IIA alpha chain;Transcription initiation factor IIA beta chain;TFIIA-alpha and beta-like factor	STON1-GTF2A1L;ALF;GTF2A1;GTF2A1L	tr|A0A0A6YYG5|A0A0A6YYG5_HUMAN Protein STON1-GTF2A1L OS=Homo sapiens GN=STON1-GTF2A1L PE=4 SV=1;tr|Q53S48|Q53S48_HUMAN Protein STON1-GTF2A1L OS=Homo sapiens GN=ALF PE=4 SV=1;sp|P52655|TF2AA_HUMAN Transcription initiation factor IIA subunit 1 OS=Homo sapien	4	1	1	1	1	1	1	0	0	1	1	1	0	1	1	1	0	0	1	1	1	0	1	1	1	0	0	1	1	1	0	0.6	0.6	0.6	127.32	1135	1135;1182;376;478	0.0035556	2.7202	By MS/MS	By MS/MS	By matching
A0A0A6YYG8;I3L0D1;Q9NYW8	A0A0A6YYG8;I3L0D1;Q9NYW8	2;2;2	2;2;2	2;2;2	RB-associated KRAB zinc finger protein	RBAK-RBAKDN;RBAK	tr|A0A0A6YYG8|A0A0A6YYG8_HUMAN Protein RBAK-RBAKDN OS=Homo sapiens GN=RBAK-RBAKDN PE=4 SV=1;tr|I3L0D1|I3L0D1_HUMAN HCG1647537, isoform CRA_b OS=Homo sapiens GN=RBAK-RBAKDN PE=4 SV=1;sp|Q9NYW8|RBAK_HUMAN RB-associated KRAB zinc finger protein OS=Homo sapien	3	2	2	2	2	2	2	1	2	2	2	2	2	2	2	2	1	2	2	2	2	2	2	2	2	1	2	2	2	2	2	20.4	20.4	20.4	12.251	113	113;243;714	0	3.1658	By MS/MS	By MS/MS	By matching
E9PLD3;A0A0B4J220;E9PRG8	E9PLD3;A0A0B4J220;E9PRG8	1;1;1	1;1;1	1;1;1	Uncharacterized protein C11orf98	C11orf98	tr|E9PLD3|E9PLD3_HUMAN Uncharacterized protein OS=Homo sapiens PE=4 SV=1;tr|A0A0B4J220|A0A0B4J220_HUMAN Chromosome 11 open reading frame 48, isoform CRA_c OS=Homo sapiens GN=C11orf98 PE=1 SV=1;sp|E9PRG8|CK098_HUMAN Uncharacterized protein C11orf98 OS=Homo	3	1	1	1	1	1	1	1	1	1	1	1	1	1	1	1	1	1	1	1	1	1	1	1	1	1	1	1	1	1	1	13.1	13.1	13.1	11.6	99	99;123;122	0	6.2119	By MS/MS	By MS/MS	By MS/MS
F5H895;A0A0B4J239;F5GXX5;P61803	F5H895;A0A0B4J239;F5GXX5;P61803	2;2;2;2	2;2;2;2	2;2;2;2	Dolichyl-diphosphooligosaccharide--protein glycosyltransferase subunit DAD1	DAD1	tr|F5H895|F5H895_HUMAN Dolichyl-diphosphooligosaccharide--protein glycosyltransferase subunit DAD1 OS=Homo sapiens GN=DAD1 PE=1 SV=1;tr|A0A0B4J239|A0A0B4J239_HUMAN Dolichyl-diphosphooligosaccharide--protein glycosyltransferase subunit DAD1 OS=Homo sapiens	4	2	2	2	2	1	2	1	1	1	1	1	1	2	1	2	1	1	1	1	1	1	2	1	2	1	1	1	1	1	1	33.8	33.8	33.8	7.2883	65	65;78;85;113	0	7.6639	By MS/MS	By matching	By MS/MS
F8VV32;A0A0B4J259;P61626	F8VV32;A0A0B4J259;P61626	2;2;2	2;2;2	2;2;2	Lysozyme;Lysozyme C	LYZ	tr|F8VV32|F8VV32_HUMAN Lysozyme C OS=Homo sapiens GN=LYZ PE=1 SV=1;tr|A0A0B4J259|A0A0B4J259_HUMAN Lysozyme C OS=Homo sapiens GN=LYZ PE=1 SV=1;sp|P61626|LYSC_HUMAN Lysozyme C OS=Homo sapiens GN=LYZ PE=1 SV=1	3	2	2	2	2	2	2	0	0	2	2	2	0	2	2	2	0	0	2	2	2	0	2	2	2	0	0	2	2	2	0	15.4	15.4	15.4	11.488	104	104;137;148	0	4.7209	By MS/MS	By matching	By MS/MS
Q5W0H4;A0A0B4J2C3;P13693;J3KPG2;E9PJF7;H0YCX0;Q56UQ5	Q5W0H4;A0A0B4J2C3;P13693;J3KPG2;E9PJF7	4;4;4;3;3;1;1	4;4;4;3;3;1;1	4;4;4;3;3;1;1	Translationally-controlled tumor protein	TPT1	tr|Q5W0H4|Q5W0H4_HUMAN Translationally-controlled tumor protein OS=Homo sapiens GN=TPT1 PE=1 SV=1;tr|A0A0B4J2C3|A0A0B4J2C3_HUMAN Translationally-controlled tumor protein OS=Homo sapiens GN=TPT1 PE=1 SV=1;sp|P13693|TCTP_HUMAN Translationally-controlled tumo	7	4	4	4	4	4	3	4	3	4	3	3	3	4	4	3	4	3	4	3	3	3	4	4	3	4	3	4	3	3	3	43.1	43.1	43.1	21.525	188	188;197;172;160;162;77;140	0	56.26	By MS/MS	By MS/MS	By MS/MS
A0A0C4DFV9;Q01105;A0A087X027;P0DME0	A0A0C4DFV9;Q01105;A0A087X027;P0DME0	4;4;3;3	4;4;3;3	4;4;3;3	Protein SET;Protein SETSIP	SET;SETSIP	tr|A0A0C4DFV9|A0A0C4DFV9_HUMAN Protein SET OS=Homo sapiens GN=SET PE=1 SV=1;sp|Q01105|SET_HUMAN Protein SET OS=Homo sapiens GN=SET PE=1 SV=3;tr|A0A087X027|A0A087X027_HUMAN Protein SETSIP OS=Homo sapiens GN=SETSIP PE=1 SV=1;sp|P0DME0|SETLP_HUMAN Protein SET	4	4	4	4	4	4	4	4	4	4	4	4	4	4	4	4	4	4	4	4	4	4	4	4	4	4	4	4	4	4	4	21.1	21.1	21.1	31.124	266	266;290;292;302	0	40.857	By MS/MS	By MS/MS	By MS/MS
C9J9K3;A0A0C4DG17;P08865;F8WD59	C9J9K3;A0A0C4DG17;P08865	8;8;8;3	8;8;8;3	8;8;8;3	40S ribosomal protein SA	RPSA	tr|C9J9K3|C9J9K3_HUMAN 40S ribosomal protein SA (Fragment) OS=Homo sapiens GN=RPSA PE=1 SV=7;tr|A0A0C4DG17|A0A0C4DG17_HUMAN 40S ribosomal protein SA OS=Homo sapiens GN=RPSA PE=1 SV=1;sp|P08865|RSSA_HUMAN 40S ribosomal protein SA OS=Homo sapiens GN=RPSA PE=	4	8	8	8	7	4	8	7	4	5	6	7	5	7	4	8	7	4	5	6	7	5	7	4	8	7	4	5	6	7	5	40.9	40.9	40.9	29.505	264	264;300;295;116	0	40.018	By MS/MS	By MS/MS	By MS/MS
A0A0C4DG89;D6RJA6;H0Y9U3	A0A0C4DG89	54;25;2	54;25;2	1;0;0		DDX46	tr|A0A0C4DG89|A0A0C4DG89_HUMAN Probable ATP-dependent RNA helicase DDX46 OS=Homo sapiens GN=DDX46 PE=1 SV=1	3	54	54	1	54	53	54	53	52	52	52	52	52	54	53	54	53	52	52	52	52	52	1	1	1	1	1	1	1	1	1	53.1	53.1	1.9	117.46	1032	1032;471;70	0	323.31	By MS/MS	By MS/MS	By MS/MS
A0A0C4DGB6;CON__P02768-1;P02768;H0YA55;D6RHD5;B7WNR0;C9JKR2;A0A087WWT3;H7C013	A0A0C4DGB6;CON__P02768-1;P02768;H0YA55;D6RHD5;B7WNR0;C9JKR2;A0A087WWT3	13;13;13;11;10;10;9;8;4	8;8;8;6;6;6;5;5;3	8;8;8;6;6;6;5;5;3	Serum albumin	ALB	tr|A0A0C4DGB6|A0A0C4DGB6_HUMAN Serum albumin OS=Homo sapiens GN=ALB PE=1 SV=1;;sp|P02768|ALBU_HUMAN Serum albumin OS=Homo sapiens GN=ALB PE=1 SV=2;tr|H0YA55|H0YA55_HUMAN Serum albumin (Fragment) OS=Homo sapiens GN=ALB PE=1 SV=1;tr|D6RHD5|D6RHD5_HUMAN Serum	9	13	8	8	12	13	12	11	10	12	13	13	10	7	8	7	6	5	7	8	8	5	7	8	7	6	5	7	8	8	5	20.4	14.1	14.1	69.226	604	604;609;609;454;459;494;417;396;197	0	22.275	By MS/MS	By MS/MS	By MS/MS
F5GWX5;A0A0C4DGG9;Q14839;K7EMY3;Q8TDI0;F2Z2R5	F5GWX5;A0A0C4DGG9;Q14839	20;20;20;5;5;2	20;20;20;5;5;2	17;17;17;2;2;1	Chromodomain-helicase-DNA-binding protein 4	CHD4	tr|F5GWX5|F5GWX5_HUMAN Chromodomain-helicase-DNA-binding protein 4 OS=Homo sapiens GN=CHD4 PE=1 SV=1;tr|A0A0C4DGG9|A0A0C4DGG9_HUMAN Chromodomain-helicase-DNA-binding protein 4 OS=Homo sapiens GN=CHD4 PE=1 SV=1;sp|Q14839|CHD4_HUMAN Chromodomain-helicase-DNA	6	20	20	17	17	13	16	18	18	16	15	16	15	17	13	16	18	18	16	15	16	15	15	12	14	16	16	14	13	14	13	13.5	13.5	12	217.1	1905	1905;1937;1912;1060;1954;1225	0	98.24	By MS/MS	By MS/MS	By MS/MS
I3L1H9;I3L3X0;A0A0C4DGN4;Q96DA0	I3L1H9;I3L3X0;A0A0C4DGN4;Q96DA0	1;1;1;1	1;1;1;1	1;1;1;1	Zymogen granule protein 16 homolog B	ZG16B	tr|I3L1H9|I3L1H9_HUMAN Zymogen granule protein 16 homolog B (Fragment) OS=Homo sapiens GN=ZG16B PE=1 SV=1;tr|I3L3X0|I3L3X0_HUMAN Zymogen granule protein 16 homolog B (Fragment) OS=Homo sapiens GN=ZG16B PE=1 SV=1;tr|A0A0C4DGN4|A0A0C4DGN4_HUMAN Zymogen granu	4	1	1	1	1	0	0	0	0	1	0	0	0	1	0	0	0	0	1	0	0	0	1	0	0	0	0	1	0	0	0	23.2	23.2	23.2	7.3695	69	69;95;178;208	0.003518	2.6512	By MS/MS
U3KQ84;A0A0C4DGS1;P39656	U3KQ84;A0A0C4DGS1;P39656	1;1;1	1;1;1	1;1;1	Dolichyl-diphosphooligosaccharide--protein glycosyltransferase 48 kDa subunit	DDOST	tr|U3KQ84|U3KQ84_HUMAN Dolichyl-diphosphooligosaccharide--protein glycosyltransferase 48 kDa subunit (Fragment) OS=Homo sapiens GN=DDOST PE=1 SV=7;tr|A0A0C4DGS1|A0A0C4DGS1_HUMAN Dolichyl-diphosphooligosaccharide--protein glycosyltransferase 48 kDa subunit	3	1	1	1	0	0	1	1	0	0	0	1	0	0	0	1	1	0	0	0	1	0	0	0	1	1	0	0	0	1	0	5.8	5.8	5.8	17.162	155	155;439;456	0.0035088	2.6303			By matching
A0A0C4DGV5;O95218	A0A0C4DGV5;O95218	16;16	16;16	16;16	Zinc finger Ran-binding domain-containing protein 2	ZRANB2	tr|A0A0C4DGV5|A0A0C4DGV5_HUMAN Zinc finger Ran-binding domain-containing protein 2 OS=Homo sapiens GN=ZRANB2 PE=1 SV=1;sp|O95218|ZRAB2_HUMAN Zinc finger Ran-binding domain-containing protein 2 OS=Homo sapiens GN=ZRANB2 PE=1 SV=2	2	16	16	16	15	16	16	15	16	15	13	16	16	15	16	16	15	16	15	13	16	16	15	16	16	15	16	15	13	16	16	40.1	40.1	40.1	38.223	337	337;330	0	82.47	By MS/MS	By MS/MS	By MS/MS
J3QR29;A0A0D9SEI3;B7ZVY7;A0A0D9SER5;A0A0D9SEN2;J3QR44;P21127;Q5QPR4;Q5QPR3;Q9UQ88;J3KS35;E7ESP2;E9PFJ2;A0A087WYI9;A0A087X1I0;Q13882	J3QR29;A0A0D9SEI3;B7ZVY7;A0A0D9SER5;A0A0D9SEN2;J3QR44;P21127;Q5QPR4;Q5QPR3;Q9UQ88	20;20;20;20;20;20;20;18;18;18;3;3;1;1;1;1	20;20;20;20;20;20;20;18;18;18;3;3;1;1;1;1	20;20;20;20;20;20;20;18;18;18;3;3;1;1;1;1	Cyclin-dependent kinase 11B;Cyclin-dependent kinase 11A	CDK11B;CDC2L1;CDK11A	tr|J3QR29|J3QR29_HUMAN Cyclin-dependent kinase 11B OS=Homo sapiens GN=CDK11B PE=1 SV=2;tr|A0A0D9SEI3|A0A0D9SEI3_HUMAN Cyclin-dependent kinase 11B OS=Homo sapiens GN=CDK11B PE=1 SV=1;tr|B7ZVY7|B7ZVY7_HUMAN Cell division cycle 2-like 1 (PITSLRE proteins) OS=	16	20	20	20	12	18	15	17	16	18	8	17	19	12	18	15	17	16	18	8	17	19	12	18	15	17	16	18	8	17	19	27.9	27.9	27.9	87.109	748	748;772;782;783;785;795;795;746;779;783;407;420;151;203;244;451	0	58.075	By MS/MS	By MS/MS	By MS/MS
A0A0D9SFB3;A0A0D9SG12;A0A0D9SF53;O00571;O15523;C9J081;A0A0J9YVQ7;C9J8G5;A0A087WVZ1;A0A0J9YYH6;D6RCM4;Q9NQI0;B4DLA0;H0Y960	A0A0D9SFB3;A0A0D9SG12;A0A0D9SF53;O00571;O15523	20;20;20;20;16;4;3;3;2;2;2;2;1;1	20;20;20;20;16;4;3;3;2;2;2;2;1;1	19;19;19;19;15;4;3;3;2;2;2;2;1;1	ATP-dependent RNA helicase DDX3X;ATP-dependent RNA helicase DDX3Y	DDX3X;DDX3Y	tr|A0A0D9SFB3|A0A0D9SFB3_HUMAN ATP-dependent RNA helicase DDX3X OS=Homo sapiens GN=DDX3X PE=1 SV=1;tr|A0A0D9SG12|A0A0D9SG12_HUMAN ATP-dependent RNA helicase DDX3X OS=Homo sapiens GN=DDX3X PE=1 SV=1;tr|A0A0D9SF53|A0A0D9SF53_HUMAN ATP-dependent RNA helicase	14	20	20	19	15	18	18	19	16	18	18	19	13	15	18	18	19	16	18	18	19	13	14	17	17	18	15	17	17	18	12	38	38	36.2	70.839	640	640;647;733;662;660;250;164;224;138;164;518;724;139;305	0	59.007	By MS/MS	By MS/MS	By MS/MS
A0A0D9SF54;A0A0D9SGF6;Q13813	A0A0D9SF54;A0A0D9SGF6;Q13813	17;17;17	17;17;17	17;17;17	Spectrin alpha chain, non-erythrocytic 1	SPTAN1	tr|A0A0D9SF54|A0A0D9SF54_HUMAN Spectrin alpha chain, non-erythrocytic 1 OS=Homo sapiens GN=SPTAN1 PE=1 SV=1;tr|A0A0D9SGF6|A0A0D9SGF6_HUMAN Spectrin alpha chain, non-erythrocytic 1 OS=Homo sapiens GN=SPTAN1 PE=1 SV=1;sp|Q13813|SPTN1_HUMAN Spectrin alpha cha	3	17	17	17	4	1	5	10	13	13	7	9	8	4	1	5	10	13	13	7	9	8	4	1	5	10	13	13	7	9	8	8.5	8.5	8.5	282.83	2457	2457;2498;2472	0	44.877	By matching	By matching	By matching
H7BY36;A0A0D9SFL3;B0QYK0;C9JGE3;Q01844	H7BY36;A0A0D9SFL3;B0QYK0;C9JGE3;Q01844	1;1;1;1;1	1;1;1;1;1	1;1;1;1;1	RNA-binding protein EWS	EWSR1	tr|H7BY36|H7BY36_HUMAN RNA-binding protein EWS (Fragment) OS=Homo sapiens GN=EWSR1 PE=1 SV=1;tr|A0A0D9SFL3|A0A0D9SFL3_HUMAN RNA-binding protein EWS OS=Homo sapiens GN=EWSR1 PE=1 SV=1;tr|B0QYK0|B0QYK0_HUMAN RNA-binding protein EWS OS=Homo sapiens GN=EWSR1 P	5	1	1	1	0	1	1	0	0	1	1	1	1	0	1	1	0	0	1	1	1	1	0	1	1	0	0	1	1	1	1	2.9	2.9	2.9	32.071	308	308;584;618;620;656	0.0094583	2.4559		By matching	By MS/MS
A0A0D9SFR6;Q86XP1	A0A0D9SFR6;Q86XP1	1;1	1;1	1;1	Diacylglycerol kinase eta	DGKH	tr|A0A0D9SFR6|A0A0D9SFR6_HUMAN Diacylglycerol kinase OS=Homo sapiens GN=DGKH PE=1 SV=1;sp|Q86XP1|DGKH_HUMAN Diacylglycerol kinase eta OS=Homo sapiens GN=DGKH PE=1 SV=1	2	1	1	1	1	1	1	1	1	1	1	1	1	1	1	1	1	1	1	1	1	1	1	1	1	1	1	1	1	1	1	1.4	1.4	1.4	114.09	1028	1028;1220	1	-2	By matching	By MS/MS	By MS/MS
Q5JRC6;A0A0D9SGE8;Q8IWS0	Q5JRC6;A0A0D9SGE8;Q8IWS0	3;3;3	3;3;3	3;3;3	PHD finger protein 6	PHF6	tr|Q5JRC6|Q5JRC6_HUMAN PHD finger protein 6 OS=Homo sapiens GN=PHF6 PE=1 SV=1;tr|A0A0D9SGE8|A0A0D9SGE8_HUMAN PHD finger protein 6 OS=Homo sapiens GN=PHF6 PE=1 SV=1;sp|Q8IWS0|PHF6_HUMAN PHD finger protein 6 OS=Homo sapiens GN=PHF6 PE=1 SV=1	3	3	3	3	2	2	3	3	3	2	2	3	3	2	2	3	3	3	2	2	3	3	2	2	3	3	3	2	2	3	3	12.7	12.7	12.7	36.43	324	324;366;365	0	6.7351	By MS/MS	By matching	By MS/MS
A0A0G2JIW1;P0DMV9;P0DMV8;V9GZ37	A0A0G2JIW1;P0DMV9;P0DMV8;V9GZ37	30;30;30;21	26;26;26;18	15;15;15;10	Heat shock 70 kDa protein 1B;Heat shock 70 kDa protein 1A	HSPA1B;HSPA1A	tr|A0A0G2JIW1|A0A0G2JIW1_HUMAN Heat shock 70 kDa protein 1B OS=Homo sapiens GN=HSPA1B PE=1 SV=1;sp|P0DMV9|HS71B_HUMAN Heat shock 70 kDa protein 1B OS=Homo sapiens GN=HSPA1B PE=1 SV=1;sp|P0DMV8|HS71A_HUMAN Heat shock 70 kDa protein 1A OS=Homo sapiens GN=HSP	4	30	26	15	27	29	29	30	28	28	29	29	28	23	25	25	26	24	24	25	25	24	14	14	15	15	14	14	15	15	14	57.3	54.2	33.3	70.108	642	642;641;641;476	0	197.88	By MS/MS	By MS/MS	By MS/MS
H0Y6K2;A0A140T9E9;A0A0G2JK44;P25440;A0A140T9V2;A0A0G2JHL0;A0A140T9F7;U3KQA6;A0A0G2JHN8;A0A140T9I1;E9PIQ3;H0YDJ7;U3KPW0;H0Y799;A0A140T9X8;E9PKQ9	H0Y6K2;A0A140T9E9;A0A0G2JK44;P25440;A0A140T9V2;A0A0G2JHL0;A0A140T9F7;U3KQA6	43;43;43;43;31;29;29;27;19;19;18;9;9;9;9;5	43;43;43;43;31;29;29;27;19;19;18;9;9;9;9;5	37;37;37;37;28;26;26;24;16;16;16;7;7;9;9;5	Bromodomain-containing protein 2	BRD2	tr|H0Y6K2|H0Y6K2_HUMAN Bromodomain-containing protein 2 (Fragment) OS=Homo sapiens GN=BRD2 PE=1 SV=1;tr|A0A140T9E9|A0A140T9E9_HUMAN Bromodomain-containing protein 2 (Fragment) OS=Homo sapiens GN=BRD2 PE=1 SV=1;tr|A0A0G2JK44|A0A0G2JK44_HUMAN Bromodomain-con	16	43	43	37	41	42	42	42	42	43	40	41	41	41	42	42	42	42	43	40	41	41	35	36	36	36	36	37	35	36	35	57.6	57.6	52.7	88.288	807	807;807;836;801;648;613;619;552;328;363;401;137;159;296;296;147	0	323.31	By MS/MS	By MS/MS	By MS/MS
A0A0G2JLD8;E7EUY5;Q04837;C9K0U8	A0A0G2JLD8;E7EUY5;Q04837;C9K0U8	3;3;3;2	3;3;3;2	3;3;3;2	Single-stranded DNA-binding protein, mitochondrial	SSBP1	tr|A0A0G2JLD8|A0A0G2JLD8_HUMAN Single-stranded DNA-binding protein, mitochondrial (Fragment) OS=Homo sapiens GN=SSBP1 PE=1 SV=1;tr|E7EUY5|E7EUY5_HUMAN Single-stranded DNA-binding protein, mitochondrial (Fragment) OS=Homo sapiens GN=SSBP1 PE=1 SV=1;sp|Q0483	4	3	3	3	1	2	3	1	0	1	0	2	1	1	2	3	1	0	1	0	2	1	1	2	3	1	0	1	0	2	1	23.9	23.9	23.9	15.598	134	134;135;148;121	0	7.2192	By MS/MS	By matching	By MS/MS
C9J2C4;A0A0J9YX62;O75190;C9JB42;C9JDR7;C9JDX6;F8WCZ4;C9J2P2;E9PH18;C9JRD2;C9JXB9;Q8WWF6;Q8NHS0;P25686	C9J2C4;A0A0J9YX62;O75190;C9JB42;C9JDR7;C9JDX6;F8WCZ4;C9J2P2;E9PH18;C9JRD2;C9JXB9;Q8WWF6;Q8NHS0;P25686	2;2;2;1;1;1;1;1;1;1;1;1;1;1	2;2;2;1;1;1;1;1;1;1;1;1;1;1	2;2;2;1;1;1;1;1;1;1;1;1;1;1	DnaJ homolog subfamily B member 6;DnaJ homolog subfamily B member 3;DnaJ homolog subfamily B member 8;DnaJ homolog subfamily B member 2	DNAJB6;DNAJB2;DNAJB3;DNAJB8	tr|C9J2C4|C9J2C4_HUMAN DnaJ homolog subfamily B member 6 (Fragment) OS=Homo sapiens GN=DNAJB6 PE=1 SV=1;tr|A0A0J9YX62|A0A0J9YX62_HUMAN DnaJ homolog subfamily B member 6 OS=Homo sapiens GN=DNAJB6 PE=1 SV=1;sp|O75190|DNJB6_HUMAN DnaJ homolog subfamily B memb	14	2	2	2	1	1	1	1	1	1	1	2	1	1	1	1	1	1	1	1	2	1	1	1	1	1	1	1	1	2	1	10.1	10.1	10.1	25.377	228	228;334;326;66;98;125;129;146;211;228;244;145;232;324	0	5.809	By MS/MS	By matching	By MS/MS
A0A0J9YXB3;P62834;P61224;A6NIZ1;F5H4H0;F5GYH7;F5H077;F5GWU8;F5H491;F5H0B7;F5H500;F5H823;B7ZB78;F5GZG1;F5H6R7;F5H004;A0A075B6Q0;F5GYB5;F5GX62;E7ESV4;F5H7Y6	A0A0J9YXB3;P62834;P61224;A6NIZ1;F5H4H0;F5GYH7;F5H077;F5GWU8;F5H491;F5H0B7;F5H500;F5H823;B7ZB78;F5GZG1;F5H6R7;F5H004;A0A075B6Q0;F5GYB5;F5GX62;E7ESV4;F5H7Y6	2;2;2;2;1;1;1;1;1;1;1;1;1;1;1;1;1;1;1;1;1	2;2;2;2;1;1;1;1;1;1;1;1;1;1;1;1;1;1;1;1;1	2;2;2;2;1;1;1;1;1;1;1;1;1;1;1;1;1;1;1;1;1	Ras-related protein Rap-1A;Ras-related protein Rap-1b;Ras-related protein Rap-1b-like protein	RAP1A;RAP1B	tr|A0A0J9YXB3|A0A0J9YXB3_HUMAN Uncharacterized protein OS=Homo sapiens PE=4 SV=1;sp|P62834|RAP1A_HUMAN Ras-related protein Rap-1A OS=Homo sapiens GN=RAP1A PE=1 SV=1;sp|P61224|RAP1B_HUMAN Ras-related protein Rap-1b OS=Homo sapiens GN=RAP1B PE=1 SV=1;sp|A6NI	21	2	2	2	1	1	1	1	1	1	0	2	1	1	1	1	1	1	1	0	2	1	1	1	1	1	1	1	0	2	1	13.3	13.3	13.3	18.85	165	165;184;184;184;48;53;85;87;93;98;101;103;118;122;122;127;129;136;139;157;179	0	5.5687	By matching	By matching	By matching
A0A0R4J2E8;A8MXP9;P43243;D6R991;D6REM6;Q68E03;B3KM87;D6RB45;D6R9F3;D6RAM9;D6RAY2;D6RBS2;D6RCM3;D6REK4;D6R8Z5;D6RBI2;D6RE02;D6RIA2;H0Y8T4	A0A0R4J2E8;A8MXP9;P43243;D6R991;D6REM6	6;6;6;5;5;2;2;1;1;1;1;1;1;1;1;1;1;1;1	6;6;6;5;5;2;2;1;1;1;1;1;1;1;1;1;1;1;1	6;6;6;5;5;2;2;1;1;1;1;1;1;1;1;1;1;1;1	Matrin-3	MATR3	tr|A0A0R4J2E8|A0A0R4J2E8_HUMAN Matrin-3 OS=Homo sapiens GN=MATR3 PE=1 SV=1;tr|A8MXP9|A8MXP9_HUMAN Matrin-3 OS=Homo sapiens GN=MATR3 PE=1 SV=1;sp|P43243|MATR3_HUMAN Matrin-3 OS=Homo sapiens GN=MATR3 PE=1 SV=2;tr|D6R991|D6R991_HUMAN Matrin-3 (Fragment) OS=Ho	19	6	6	6	3	4	6	5	4	4	3	4	3	3	4	6	5	4	4	3	4	3	3	4	6	5	4	4	3	4	3	8.4	8.4	8.4	94.622	847	847;895;847;433;794;283;509;47;78;81;86;87;99;100;107;109;125;172;334	0	16.07	By MS/MS	By MS/MS	By MS/MS
A0A0U1RQF0;P49327;A0A0U1RRG3	A0A0U1RQF0;P49327	34;34;3	34;34;3	34;34;3	Fatty acid synthase;[Acyl-carrier-protein] S-acetyltransferase;[Acyl-carrier-protein] S-malonyltransferase;3-oxoacyl-[acyl-carrier-protein] synthase;3-oxoacyl-[acyl-carrier-protein] reductase;3-hydroxyacyl-[acyl-carrier-protein] dehydratase;Enoyl-[acyl-carrier-protein] reductase;Oleoyl-[acyl-carrier-protein] hydrolase	FASN	tr|A0A0U1RQF0|A0A0U1RQF0_HUMAN Fatty acid synthase OS=Homo sapiens GN=FASN PE=1 SV=1;sp|P49327|FAS_HUMAN Fatty acid synthase OS=Homo sapiens GN=FASN PE=1 SV=3	3	34	34	34	20	21	29	24	21	23	18	26	18	20	21	29	24	21	23	18	26	18	20	21	29	24	21	23	18	26	18	18.2	18.2	18.2	273.2	2509	2509;2511;150	0	116.71	By MS/MS	By MS/MS	By MS/MS
A0A0U1RQV4;Q13464	A0A0U1RQV4;Q13464	10;10	10;10	8;8	Rho-associated protein kinase 1	ROCK1	tr|A0A0U1RQV4|A0A0U1RQV4_HUMAN Rho-associated protein kinase 1 OS=Homo sapiens GN=ROCK1 PE=1 SV=1;sp|Q13464|ROCK1_HUMAN Rho-associated protein kinase 1 OS=Homo sapiens GN=ROCK1 PE=1 SV=1	2	10	10	8	2	7	6	8	9	7	7	5	2	2	7	6	8	9	7	7	5	2	1	5	4	6	7	5	5	4	1	9.2	9.2	7.6	133.07	1137	1137;1354	0	24.148	By matching	By MS/MS	By MS/MS
A0A0U1RQY8;F5H562;E7ET55;F5H748;B7ZLR4;P35670	A0A0U1RQY8;F5H562;E7ET55;F5H748;B7ZLR4;P35670	1;1;1;1;1;1	1;1;1;1;1;1	1;1;1;1;1;1	Copper-transporting ATPase 2;WND/140 kDa	ATP7B	tr|A0A0U1RQY8|A0A0U1RQY8_HUMAN Copper-transporting ATPase 2 OS=Homo sapiens GN=ATP7B PE=1 SV=1;tr|F5H562|F5H562_HUMAN Copper-transporting ATPase 2 OS=Homo sapiens GN=ATP7B PE=1 SV=1;tr|E7ET55|E7ET55_HUMAN Copper-transporting ATPase 2 OS=Homo sapiens GN=ATP	6	1	1	1	1	1	0	1	1	1	1	1	1	1	1	0	1	1	1	1	1	1	1	1	0	1	1	1	1	1	1	1.5	1.5	1.5	96.206	894	894;1035;1387;1400;1417;1465	1	-2	By MS/MS	By MS/MS
C9J0D1;A0A0U1RR32;A0A0U1RRH7;Q99878;Q96KK5;Q71UI9;P0C0S5;Q9BTM1;Q16777;Q93077;Q7L7L0;Q6FI13;P20671;P0C0S8;P04908;Q96QV6;P16104;C9J386;H0YFX9;Q8IUE6	C9J0D1;A0A0U1RR32;A0A0U1RRH7;Q99878;Q96KK5;Q71UI9;P0C0S5;Q9BTM1;Q16777;Q93077;Q7L7L0;Q6FI13;P20671;P0C0S8;P04908;Q96QV6;P16104;C9J386;H0YFX9;Q8IUE6	2;2;2;2;2;2;2;2;2;2;2;2;2;2;2;2;2;1;1;1	2;2;2;2;2;2;2;2;2;2;2;2;2;2;2;2;2;1;1;1	2;2;2;2;2;2;2;2;2;2;2;2;2;2;2;2;2;1;1;1	Histone H2A;Histone H2A type 1-J;Histone H2A type 1-H;Histone H2A.V;Histone H2A.Z;Histone H2A.J;Histone H2A type 2-C;Histone H2A type 1-C;Histone H2A type 3;Histone H2A type 2-A;Histone H2A type 1-D;Histone H2A type 1;Histone H2A type 1-B/E;Histone H2A type 1-A;Histone H2AX;Histone H2A type 2-B	H2AFV;HIST1H2AJ;HIST1H2AH;H2AFZ;H2AFJ;HIST2H2AC;HIST1H2AC;HIST3H2A;HIST2H2AA3;HIST1H2AD;HIST1H2AG;HIST1H2AB;HIST1H2AA;H2AFX;HIST2H2AB	tr|C9J0D1|C9J0D1_HUMAN Histone H2A OS=Homo sapiens GN=H2AFV PE=1 SV=1;tr|A0A0U1RR32|A0A0U1RR32_HUMAN Histone H2A OS=Homo sapiens GN=hCG_2039566 PE=3 SV=1;tr|A0A0U1RRH7|A0A0U1RRH7_HUMAN Histone H2A OS=Homo sapiens PE=3 SV=1;sp|Q99878|H2A1J_HUMAN Histone H2A	20	2	2	2	0	0	1	0	0	1	2	1	2	0	0	1	0	0	1	2	1	2	0	0	1	0	0	1	2	1	2	13.1	13.1	13.1	13.163	122	122;169;170;128;128;128;128;129;129;130;130;130;130;130;130;131;143;76;92;130	0	5.2557			By MS/MS
A6NLN1;A0A0U1RRM4;P26599;A0A0D9SF20;O95758;A0A087WUW5;A0A087WU68;K7EK45	A6NLN1;A0A0U1RRM4;P26599;A0A0D9SF20;O95758	3;3;3;2;2;1;1;1	3;3;3;2;2;1;1;1	3;3;3;2;2;1;1;1	Polypyrimidine tract-binding protein 1;Polypyrimidine tract-binding protein 3	PTBP1;PTBP3	tr|A6NLN1|A6NLN1_HUMAN Polypyrimidine tract binding protein 1, isoform CRA_b OS=Homo sapiens GN=PTBP1 PE=1 SV=4;tr|A0A0U1RRM4|A0A0U1RRM4_HUMAN Polypyrimidine tract-binding protein 1 OS=Homo sapiens GN=PTBP1 PE=1 SV=1;sp|P26599|PTBP1_HUMAN Polypyrimidine tr	8	3	3	3	2	1	3	2	2	1	3	2	1	2	1	3	2	2	1	3	2	1	2	1	3	2	2	1	3	2	1	5.3	5.3	5.3	56.51	527	527;588;531;197;552;82;227;256	0	7.3979	By MS/MS	By matching	By MS/MS
A0A0U1RRM6;Q8N8S7;A0A075B6E5;A0A0U1RQP7	A0A0U1RRM6;Q8N8S7;A0A075B6E5;A0A0U1RQP7	4;4;3;2	4;4;3;2	4;4;3;2	Protein enabled homolog	ENAH	tr|A0A0U1RRM6|A0A0U1RRM6_HUMAN Protein enabled homolog OS=Homo sapiens GN=ENAH PE=1 SV=1;sp|Q8N8S7|ENAH_HUMAN Protein enabled homolog OS=Homo sapiens GN=ENAH PE=1 SV=2;tr|A0A075B6E5|A0A075B6E5_HUMAN Protein enabled homolog (Fragment) OS=Homo sapiens GN=ENA	4	4	4	4	2	1	2	3	2	2	1	4	3	2	1	2	3	2	2	1	4	3	2	1	2	3	2	2	1	4	3	5	5	5	87.399	802	802;591;213;242	0	10.625	By MS/MS	By MS/MS	By MS/MS
A0AVT1;H0Y8S8	A0AVT1;H0Y8S8	4;2	4;2	4;2	Ubiquitin-like modifier-activating enzyme 6	UBA6	sp|A0AVT1|UBA6_HUMAN Ubiquitin-like modifier-activating enzyme 6 OS=Homo sapiens GN=UBA6 PE=1 SV=1;tr|H0Y8S8|H0Y8S8_HUMAN Ubiquitin-like modifier-activating enzyme 6 (Fragment) OS=Homo sapiens GN=UBA6 PE=1 SV=1	2	4	4	4	3	2	2	2	3	3	2	2	2	3	2	2	2	3	3	2	2	2	3	2	2	2	3	3	2	2	2	4.9	4.9	4.9	117.97	1052	1052;271	0	8.968	By MS/MS	By MS/MS	By matching
H0YGJ6;A0JP02;B4DJX4;Q9HAU0	H0YGJ6;A0JP02;B4DJX4;Q9HAU0	1;1;1;1	1;1;1;1	1;1;1;1	Pleckstrin homology domain-containing family A member 5	PLEKHA5	tr|H0YGJ6|H0YGJ6_HUMAN Pleckstrin homology domain-containing family A member 5 (Fragment) OS=Homo sapiens GN=PLEKHA5 PE=1 SV=1;tr|A0JP02|A0JP02_HUMAN PLEKHA5 protein OS=Homo sapiens GN=PLEKHA5 PE=1 SV=1;tr|B4DJX4|B4DJX4_HUMAN Pleckstrin homology domain-con	4	1	1	1	1	0	0	1	1	1	0	0	1	1	0	0	1	1	1	0	0	1	1	0	0	1	1	1	0	0	1	5.5	5.5	5.5	45.24	397	397;874;977;1116	0	3.5084	By matching
A2AJT9;H7BXX2;F2Z385	A2AJT9;H7BXX2;F2Z385	3;2;2	3;2;2	3;2;2	Uncharacterized protein CXorf23	CXorf23	sp|A2AJT9|CX023_HUMAN Uncharacterized protein CXorf23 OS=Homo sapiens GN=CXorf23 PE=1 SV=1;tr|H7BXX2|H7BXX2_HUMAN Uncharacterized protein CXorf23 (Fragment) OS=Homo sapiens GN=CXorf23 PE=1 SV=1;tr|F2Z385|F2Z385_HUMAN Uncharacterized protein CXorf23 OS=Homo	3	3	3	3	3	3	3	2	1	1	0	0	1	3	3	3	2	1	1	0	0	1	3	3	3	2	1	1	0	0	1	5.9	5.9	5.9	83.87	711	711;234;240	0	9.5258	By MS/MS	By MS/MS	By MS/MS
A6NCQ0;A6NJU6;A6NFX8;Q9UKK9;H0YEY4;C9JYY9	A6NCQ0;A6NJU6;A6NFX8;Q9UKK9;H0YEY4	3;3;3;3;2;1	3;3;3;3;2;1	3;3;3;3;2;1	ADP-sugar pyrophosphatase	NUDT5	tr|A6NCQ0|A6NCQ0_HUMAN ADP-sugar pyrophosphatase OS=Homo sapiens GN=NUDT5 PE=1 SV=1;tr|A6NJU6|A6NJU6_HUMAN ADP-sugar pyrophosphatase OS=Homo sapiens GN=NUDT5 PE=1 SV=2;tr|A6NFX8|A6NFX8_HUMAN ADP-sugar pyrophosphatase OS=Homo sapiens GN=NUDT5 PE=1 SV=1;sp|Q	6	3	3	3	1	2	3	2	1	2	2	2	1	1	2	3	2	1	2	2	2	1	1	2	3	2	1	2	2	2	1	19.4	19.4	19.4	19.961	180	180;186;232;219;137;98	0	7.078	By MS/MS	By MS/MS	By MS/MS
A6NL93;A6NEL0;P05114	A6NL93;A6NEL0;P05114	1;1;1	1;1;1	1;1;1	Non-histone chromosomal protein HMG-14	HMGN1	tr|A6NL93|A6NL93_HUMAN Non-histone chromosomal protein HMG-14 OS=Homo sapiens GN=HMGN1 PE=1 SV=1;tr|A6NEL0|A6NEL0_HUMAN Non-histone chromosomal protein HMG-14 OS=Homo sapiens GN=HMGN1 PE=1 SV=1;sp|P05114|HMGN1_HUMAN Non-histone chromosomal protein HMG-14 O	3	1	1	1	1	1	1	1	1	1	1	1	1	1	1	1	1	1	1	1	1	1	1	1	1	1	1	1	1	1	1	14.4	14.4	14.4	9.5355	90	90;116;100	0	3.9209	By matching	By matching	By MS/MS
H3BMT0;H3BTV5;H3BU16;A6NGP5;H3BMV3;Q9H910	H3BMT0;H3BTV5;H3BU16;A6NGP5;H3BMV3;Q9H910	2;2;2;2;2;2	2;2;2;2;2;2	2;2;2;2;2;2	Hematological and neurological expressed 1-like protein	HN1L	tr|H3BMT0|H3BMT0_HUMAN Hematological and neurological-expressed 1-like protein (Fragment) OS=Homo sapiens GN=HN1L PE=1 SV=1;tr|H3BTV5|H3BTV5_HUMAN Hematological and neurological-expressed 1-like protein (Fragment) OS=Homo sapiens GN=HN1L PE=1 SV=1;tr|H3BU1	6	2	2	2	2	0	0	1	1	1	2	2	1	2	0	0	1	1	1	2	2	1	2	0	0	1	1	1	2	2	1	24.3	24.3	24.3	12.23	115	115;116;167;178;190;190	0	5.8456	By MS/MS
A6NHL2	A6NHL2	3	1	1	Tubulin alpha chain-like 3	TUBAL3	sp|A6NHL2|TBAL3_HUMAN Tubulin alpha chain-like 3 OS=Homo sapiens GN=TUBAL3 PE=1 SV=2	1	3	1	1	3	2	3	3	2	3	3	3	3	1	0	1	1	0	1	1	1	1	1	0	1	1	0	1	1	1	1	7.4	3.8	3.8	49.908	446	446	0	6.5377	By MS/MS	By matching	By MS/MS
A6NIE6	A6NIE6	1	1	1	Putative RRN3-like protein RRN3P2	RRN3P2	sp|A6NIE6|RN3P2_HUMAN Putative RRN3-like protein RRN3P2 OS=Homo sapiens GN=RRN3P2 PE=5 SV=3	1	1	1	1	1	1	1	1	1	1	1	1	1	1	1	1	1	1	1	1	1	1	1	1	1	1	1	1	1	1	1	3.2	3.2	3.2	38.034	340	340	0	3.9015	By matching	By MS/MS	By MS/MS
A6NMQ3;Q5T5H1;O43768	A6NMQ3;Q5T5H1;O43768	2;2;2	2;2;2	2;2;2	Alpha-endosulfine	ENSA	tr|A6NMQ3|A6NMQ3_HUMAN Alpha-endosulfine OS=Homo sapiens GN=ENSA PE=1 SV=2;tr|Q5T5H1|Q5T5H1_HUMAN Alpha-endosulfine OS=Homo sapiens GN=ENSA PE=1 SV=1;sp|O43768|ENSA_HUMAN Alpha-endosulfine OS=Homo sapiens GN=ENSA PE=1 SV=1	3	2	2	2	2	2	2	2	2	2	2	2	2	2	2	2	2	2	2	2	2	2	2	2	2	2	2	2	2	2	2	22.1	22.1	22.1	15.634	140	140;187;121	0	13.3	By MS/MS	By MS/MS	By MS/MS
A8MQ02;J3KN01;P55196;Q5TIG5;H0Y8L4;H0Y948;H0Y7R8;H0Y8U8;H0YA98;H0Y9I0;F8W9I4;E9PFY5	A8MQ02;J3KN01;P55196;Q5TIG5	15;15;15;11;5;3;3;2;2;1;1;1	15;15;15;11;5;3;3;2;2;1;1;1	15;15;15;11;5;3;3;2;2;1;1;1	Afadin	MLLT4	tr|A8MQ02|A8MQ02_HUMAN Afadin OS=Homo sapiens GN=MLLT4 PE=1 SV=2;tr|J3KN01|J3KN01_HUMAN Afadin OS=Homo sapiens GN=MLLT4 PE=1 SV=1;sp|P55196|AFAD_HUMAN Afadin OS=Homo sapiens GN=MLLT4 PE=1 SV=3;tr|Q5TIG5|Q5TIG5_HUMAN Afadin OS=Homo sapiens GN=MLLT4 PE=1 SV=	12	15	15	15	7	9	7	12	14	12	6	10	12	7	9	7	12	14	12	6	10	12	7	9	7	12	14	12	6	10	12	11.7	11.7	11.7	201.8	1781	1781;1831;1824;1665;313;191;389;124;167;129;247;250	0	36.919	By MS/MS	By MS/MS	By matching
J3QLE5;A8MT02;P63162;P14678;J3KRY3;S4R3P3	J3QLE5;A8MT02;P63162;P14678;J3KRY3;S4R3P3	3;3;3;3;2;2	3;3;3;3;2;2	3;3;3;3;2;2	Small nuclear ribonucleoprotein-associated protein N;Small nuclear ribonucleoprotein-associated proteins B and B	SNRPN;SNRPB	tr|J3QLE5|J3QLE5_HUMAN Small nuclear ribonucleoprotein-associated protein N (Fragment) OS=Homo sapiens GN=SNRPN PE=1 SV=1;tr|A8MT02|A8MT02_HUMAN Small nuclear ribonucleoprotein-associated proteins B and B OS=Homo sapiens GN=SNRPB PE=1 SV=3;sp|P63162|RSMN_	6	3	3	3	2	0	2	2	1	1	2	3	1	2	0	2	2	1	1	2	3	1	2	0	2	2	1	1	2	3	1	13.6	13.6	13.6	17.546	169	169;288;240;240;59;70	0	6.984	By MS/MS		By MS/MS
A8MUA9;A8MU27;Q6EEV6;P61956;P55854	A8MUA9;A8MU27;Q6EEV6;P61956;P55854	1;1;1;1;1	1;1;1;1;1	1;1;1;1;1	Small ubiquitin-related modifier 4;Small ubiquitin-related modifier 2;Small ubiquitin-related modifier 3	SUMO3;SUMO4;SUMO2	tr|A8MUA9|A8MUA9_HUMAN SMT3 suppressor of mif two 3 homolog 3 (Yeast), isoform CRA_d OS=Homo sapiens GN=SUMO3 PE=1 SV=1;tr|A8MU27|A8MU27_HUMAN Small ubiquitin-related modifier 3 OS=Homo sapiens GN=SUMO3 PE=1 SV=1;sp|Q6EEV6|SUMO4_HUMAN Small ubiquitin-relat	5	1	1	1	1	1	1	0	0	0	0	1	0	1	1	1	0	0	0	0	1	0	1	1	1	0	0	0	0	1	0	8.9	8.9	8.9	15.317	135	135;147;95;95;103	0	4.508	By MS/MS	By MS/MS	By MS/MS
H7BY10;K7EJV9;K7ERT8;A8MUS3;P62750;K7EMA7	H7BY10;K7EJV9;K7ERT8;A8MUS3;P62750;K7EMA7	6;6;6;6;6;4	6;6;6;6;6;4	6;6;6;6;6;4	60S ribosomal protein L23a	RPL23A	tr|H7BY10|H7BY10_HUMAN 60S ribosomal protein L23a (Fragment) OS=Homo sapiens GN=RPL23A PE=1 SV=1;tr|K7EJV9|K7EJV9_HUMAN 60S ribosomal protein L23a (Fragment) OS=Homo sapiens GN=RPL23A PE=1 SV=1;tr|K7ERT8|K7ERT8_HUMAN 60S ribosomal protein L23a (Fragment) O	6	6	6	6	6	6	6	6	6	6	6	6	6	6	6	6	6	6	6	6	6	6	6	6	6	6	6	6	6	6	6	32.3	32.3	32.3	17.692	158	158;170;175;194;156;70	0	25.593	By MS/MS	By MS/MS	By MS/MS
Q49AN9;F5H013;P62308;A8MWD9	Q49AN9;F5H013;P62308;A8MWD9	1;1;1;1	1;1;1;1	1;1;1;1	Small nuclear ribonucleoprotein G;Putative small nuclear ribonucleoprotein G-like protein 15	SNRPG;SNRPGP15	tr|Q49AN9|Q49AN9_HUMAN SNRPG protein OS=Homo sapiens GN=SNRPG PE=1 SV=1;tr|F5H013|F5H013_HUMAN Small nuclear ribonucleoprotein G OS=Homo sapiens GN=SNRPG PE=1 SV=1;sp|P62308|RUXG_HUMAN Small nuclear ribonucleoprotein G OS=Homo sapiens GN=SNRPG PE=1 SV=1;sp	4	1	1	1	0	1	1	1	0	0	1	0	0	0	1	1	1	0	0	1	0	0	0	1	1	1	0	0	1	0	0	18.8	18.8	18.8	7.1013	64	64;68;76;76	0.0018248	2.9753		By matching	By MS/MS
A8MX94;P09211;A0A087X2E9	A8MX94;P09211	3;3;1	3;3;1	3;3;1	Glutathione S-transferase P	GSTP1	tr|A8MX94|A8MX94_HUMAN Glutathione S-transferase P OS=Homo sapiens GN=GSTP1 PE=1 SV=1;sp|P09211|GSTP1_HUMAN Glutathione S-transferase P OS=Homo sapiens GN=GSTP1 PE=1 SV=2	3	3	3	3	3	3	3	3	1	3	3	3	2	3	3	3	3	1	3	3	3	2	3	3	3	3	1	3	3	3	2	23	23	23	19.48	174	174;210;79	0	7.5068	By MS/MS	By MS/MS	By MS/MS
A9Z1X7;Q8IYB3;E9PCT1;M0R088;M0R1E7;M0QXG5	A9Z1X7;Q8IYB3;E9PCT1;M0R088	19;19;17;13;2;2	19;19;17;13;2;2	19;19;17;13;2;2	Serine/arginine repetitive matrix protein 1	SRRM1	tr|A9Z1X7|A9Z1X7_HUMAN Serine/arginine repetitive matrix protein 1 OS=Homo sapiens GN=SRRM1 PE=1 SV=1;sp|Q8IYB3|SRRM1_HUMAN Serine/arginine repetitive matrix protein 1 OS=Homo sapiens GN=SRRM1 PE=1 SV=2;tr|E9PCT1|E9PCT1_HUMAN Serine/arginine repetitive mat	6	19	19	19	17	17	19	18	18	17	16	18	19	17	17	19	18	18	17	16	18	19	17	17	19	18	18	17	16	18	19	25.3	25.3	25.3	103.39	913	913;904;820;681;79;102	0	111.79	By MS/MS	By MS/MS	By MS/MS
B0QY89;Q9Y262;C9JHP4;C9K0Q7;H7C3A0;B0QY90	B0QY89;Q9Y262;C9JHP4;C9K0Q7	3;3;2;2;1;1	3;3;2;2;1;1	3;3;2;2;1;1	Eukaryotic translation initiation factor 3 subunit L	EIF3L	tr|B0QY89|B0QY89_HUMAN Eukaryotic translation initiation factor 3 subunit L OS=Homo sapiens GN=EIF3L PE=1 SV=1;sp|Q9Y262|EIF3L_HUMAN Eukaryotic translation initiation factor 3 subunit L OS=Homo sapiens GN=EIF3L PE=1 SV=1;tr|C9JHP4|C9JHP4_HUMAN Eukaryotic t	6	3	3	3	1	0	3	1	0	1	1	2	1	1	0	3	1	0	1	1	2	1	1	0	3	1	0	1	1	2	1	6.3	6.3	6.3	70.901	607	607;564;150;183;127;466	0	8.3885	By matching		By MS/MS
B0QZK9;B0QZK8;X6RGJ2;Q5SSJ5	B0QZK9;B0QZK8;X6RGJ2;Q5SSJ5	1;1;1;1	1;1;1;1	1;1;1;1	Heterochromatin protein 1-binding protein 3	HP1BP3	tr|B0QZK9|B0QZK9_HUMAN Heterochromatin protein 1-binding protein 3 (Fragment) OS=Homo sapiens GN=HP1BP3 PE=1 SV=7;tr|B0QZK8|B0QZK8_HUMAN Heterochromatin protein 1-binding protein 3 (Fragment) OS=Homo sapiens GN=HP1BP3 PE=1 SV=1;tr|X6RGJ2|X6RGJ2_HUMAN Heter	4	1	1	1	1	1	1	1	0	0	0	0	0	1	1	1	1	0	0	0	0	0	1	1	1	1	0	0	0	0	0	17.1	17.1	17.1	8.2371	76	76;124;327;553	0.0035587	2.7202	By matching	By matching	By MS/MS
B0S8I6;Q9Y247;Q14320	B0S8I6;Q9Y247;Q14320	1;1;1	1;1;1	1;1;1	Protein FAM50B;Protein FAM50A	FAM50A;FAM50B	tr|B0S8I6|B0S8I6_HUMAN Protein FAM50A (Fragment) OS=Homo sapiens GN=FAM50A PE=1 SV=1;sp|Q9Y247|FA50B_HUMAN Protein FAM50B OS=Homo sapiens GN=FAM50B PE=1 SV=1;sp|Q14320|FA50A_HUMAN Protein FAM50A OS=Homo sapiens GN=FAM50A PE=1 SV=2	3	1	1	1	1	0	1	1	1	1	0	1	1	1	0	1	1	1	1	0	1	1	1	0	1	1	1	1	0	1	1	5	5	5	30.693	260	260;325;339	0	5.1401	By matching		By MS/MS
B0YIW6;P48444;Q6P1Q5	B0YIW6;P48444;Q6P1Q5	4;4;2	4;4;2	4;4;2	Coatomer subunit delta	ARCN1	tr|B0YIW6|B0YIW6_HUMAN Archain 1, isoform CRA_a OS=Homo sapiens GN=ARCN1 PE=1 SV=1;sp|P48444|COPD_HUMAN Coatomer subunit delta OS=Homo sapiens GN=ARCN1 PE=1 SV=1;tr|Q6P1Q5|Q6P1Q5_HUMAN ARCN1 protein OS=Homo sapiens GN=ARCN1 PE=1 SV=1	3	4	4	4	3	2	4	2	2	1	3	3	1	3	2	4	2	2	1	3	3	1	3	2	4	2	2	1	3	3	1	8.2	8.2	8.2	61.626	552	552;511;189	0	9.6389	By MS/MS	By MS/MS	By MS/MS
B1AHC9;P12956	B1AHC9;P12956	15;15	15;15	15;15	X-ray repair cross-complementing protein 6	XRCC6	tr|B1AHC9|B1AHC9_HUMAN X-ray repair cross-complementing protein 6 OS=Homo sapiens GN=XRCC6 PE=1 SV=1;sp|P12956|XRCC6_HUMAN X-ray repair cross-complementing protein 6 OS=Homo sapiens GN=XRCC6 PE=1 SV=2	2	15	15	15	14	12	13	13	13	15	12	15	11	14	12	13	13	13	15	12	15	11	14	12	13	13	13	15	12	15	11	33.3	33.3	33.3	64.283	559	559;609	0	59.781	By MS/MS	By MS/MS	By MS/MS
B1AJY5;B1AJY7;O75832;B1AJY6	B1AJY5;B1AJY7;O75832;B1AJY6	2;2;2;1	2;2;2;1	2;2;2;1	26S proteasome non-ATPase regulatory subunit 10	PSMD10	tr|B1AJY5|B1AJY5_HUMAN 26S proteasome non-ATPase regulatory subunit 10 OS=Homo sapiens GN=PSMD10 PE=1 SV=1;tr|B1AJY7|B1AJY7_HUMAN 26S proteasome non-ATPase regulatory subunit 10 OS=Homo sapiens GN=PSMD10 PE=1 SV=1;sp|O75832|PSD10_HUMAN 26S proteasome non-A	4	2	2	2	0	1	2	1	1	1	1	2	0	0	1	2	1	1	1	1	2	0	0	1	2	1	1	1	1	2	0	17.3	17.3	17.3	20.217	185	185;193;226;110	0	3.6858		By MS/MS	By matching
B1AK87;B1AK85;B1AK88;P47756	B1AK87;B1AK85;B1AK88;P47756	3;3;3;3	3;3;3;3	3;3;3;3	F-actin-capping protein subunit beta	CAPZB	tr|B1AK87|B1AK87_HUMAN Capping protein (Actin filament) muscle Z-line, beta, isoform CRA_a OS=Homo sapiens GN=CAPZB PE=1 SV=1;tr|B1AK85|B1AK85_HUMAN F-actin-capping protein subunit beta OS=Homo sapiens GN=CAPZB PE=1 SV=1;tr|B1AK88|B1AK88_HUMAN Capping prot	4	3	3	3	1	3	2	1	2	0	2	3	0	1	3	2	1	2	0	2	3	0	1	3	2	1	2	0	2	3	0	14.2	14.2	14.2	29.295	260	260;260;301;277	0	6.6242	By MS/MS	By MS/MS	By MS/MS
B1AKN3;Q9P2R6	B1AKN3;Q9P2R6	1;1	1;1	1;1	Arginine-glutamic acid dipeptide repeats protein	RERE	tr|B1AKN3|B1AKN3_HUMAN Arginine-glutamic acid dipeptide (RE) repeats, isoform CRA_b OS=Homo sapiens GN=RERE PE=1 SV=1;sp|Q9P2R6|RERE_HUMAN Arginine-glutamic acid dipeptide repeats protein OS=Homo sapiens GN=RERE PE=1 SV=2	2	1	1	1	0	0	0	0	0	0	0	0	1	0	0	0	0	0	0	0	0	1	0	0	0	0	0	0	0	0	1	0.8	0.8	0.8	141.54	1298	1298;1566	0.0018349	3.022
B1ALA9;P60891;B7ZB02;P11908	B1ALA9;P60891;B7ZB02;P11908	2;2;1;1	2;2;1;1	2;2;1;1	Ribose-phosphate pyrophosphokinase 1;Ribose-phosphate pyrophosphokinase 2	PRPS1;PRPS2	tr|B1ALA9|B1ALA9_HUMAN Ribose-phosphate pyrophosphokinase 1 OS=Homo sapiens GN=PRPS1 PE=1 SV=1;sp|P60891|PRPS1_HUMAN Ribose-phosphate pyrophosphokinase 1 OS=Homo sapiens GN=PRPS1 PE=1 SV=2;tr|B7ZB02|B7ZB02_HUMAN Ribose-phosphate pyrophosphokinase 1 OS=Homo	4	2	2	2	0	0	2	1	1	0	1	1	0	0	0	2	1	1	0	1	1	0	0	0	2	1	1	0	1	1	0	9.6	9.6	9.6	24.084	218	218;318;114;318	0.0018365	3.0274			By MS/MS
B1AN99;P35030	B1AN99;P35030	1;1	1;1	1;1	Trypsin-3	PRSS3	tr|B1AN99|B1AN99_HUMAN Trypsin-3 (Fragment) OS=Homo sapiens GN=PRSS3 PE=1 SV=7;sp|P35030|TRY3_HUMAN Trypsin-3 OS=Homo sapiens GN=PRSS3 PE=1 SV=2	2	1	1	1	1	1	1	1	1	1	1	1	1	1	1	1	1	1	1	1	1	1	1	1	1	1	1	1	1	1	1	7.3	7.3	7.3	19.401	178	178;304	0	8.8667	By MS/MS	By MS/MS	By MS/MS
B1ANR0;Q13310;H0Y5F5;H0YEQ8;B1ANR1;H0YCC8;H0YEU6	B1ANR0;Q13310;H0Y5F5	5;5;3;2;2;2;1	1;1;1;0;0;1;0	1;1;1;0;0;1;0	Polyadenylate-binding protein;Polyadenylate-binding protein 4	PABPC4	tr|B1ANR0|B1ANR0_HUMAN Polyadenylate-binding protein OS=Homo sapiens GN=PABPC4 PE=1 SV=1;sp|Q13310|PABP4_HUMAN Polyadenylate-binding protein 4 OS=Homo sapiens GN=PABPC4 PE=1 SV=1;tr|H0Y5F5|H0Y5F5_HUMAN Polyadenylate-binding protein (Fragment) OS=Homo sapie	7	5	1	1	4	4	4	4	5	3	3	5	4	1	1	1	1	1	0	0	1	1	1	1	1	1	1	0	0	1	1	8.8	1.3	1.3	67.97	615	615;644;550;112;129;197;249	0.009434	2.4466	By matching	By matching	By MS/MS
B2R4S9;U3KQK0;Q99880;Q99879;Q99877;Q93079;Q5QNW6;P62807;P58876;P57053;O60814;Q96A08	B2R4S9;U3KQK0;Q99880;Q99879;Q99877;Q93079;Q5QNW6;P62807;P58876;P57053;O60814;Q96A08	5;5;5;5;5;5;5;5;5;5;5;3	5;5;5;5;5;5;5;5;5;5;5;3	1;1;1;1;1;1;1;1;1;1;1;0	Histone H2B;Histone H2B type 1-L;Histone H2B type 1-M;Histone H2B type 1-N;Histone H2B type 1-H;Histone H2B type 2-F;Histone H2B type 1-C/E/F/G/I;Histone H2B type 1-D;Histone H2B type F-S;Histone H2B type 1-K;Histone H2B type 1-A	HIST1H2BI;HIST1H2BN;HIST1H2BL;HIST1H2BM;HIST1H2BH;HIST2H2BF;HIST1H2BC;HIST1H2BD;H2BFS;HIST1H2BK;HIST1H2BA	tr|B2R4S9|B2R4S9_HUMAN Histone H2B OS=Homo sapiens GN=HIST1H2BF PE=2 SV=1;tr|U3KQK0|U3KQK0_HUMAN Histone H2B OS=Homo sapiens GN=HIST1H2BN PE=1 SV=1;sp|Q99880|H2B1L_HUMAN Histone H2B type 1-L OS=Homo sapiens GN=HIST1H2BL PE=1 SV=3;sp|Q99879|H2B1M_HUMAN Hist	12	5	5	1	3	4	5	5	5	5	4	4	5	3	4	5	5	5	5	4	4	5	0	1	1	1	1	1	1	1	1	40.5	40.5	7.1	13.906	126	126;166;126;126;126;126;126;126;126;126;126;127	0	11.618	By MS/MS	By MS/MS	By MS/MS
B2R5W2;G3V4C1;G3V2Q1;P07910;G3V4W0;B4DY08;G3V576;G3V555;G3V575;G3V2D6;G3V5X6;G3V3K6;G3V251;B4DSU6;G3V5V7;O60812;G3V4M8;A0A0G2JPF8;A0A0G2JNQ3;P0DMR1;B7ZW38;B2RXH8;G3V2H6	B2R5W2;G3V4C1;G3V2Q1;P07910;G3V4W0;B4DY08;G3V576;G3V555;G3V575;G3V2D6	7;7;7;7;6;6;5;4;4;4;3;3;3;3;3;3;2;2;2;2;2;2;1	7;7;7;7;6;6;5;4;4;4;3;3;3;3;3;3;2;2;2;2;2;2;1	7;7;7;7;6;6;5;4;4;4;3;3;3;3;3;3;2;2;2;2;2;2;1	Heterogeneous nuclear ribonucleoproteins C1/C2	HNRNPC	tr|B2R5W2|B2R5W2_HUMAN Heterogeneous nuclear ribonucleoproteins C1/C2 OS=Homo sapiens GN=HNRNPC PE=1 SV=1;tr|G3V4C1|G3V4C1_HUMAN Heterogeneous nuclear ribonucleoproteins C1/C2 OS=Homo sapiens GN=HNRNPC PE=1 SV=1;tr|G3V2Q1|G3V2Q1_HUMAN Heterogeneous nuclear	23	7	7	7	6	5	7	5	6	4	5	6	6	6	5	7	5	6	4	5	6	6	6	5	7	5	6	4	5	6	6	26.9	26.9	26.9	31.948	290	290;292;305;306;262;288;231;175;187;214;117;121;126;147;180;293;66;293;293;293;293;293;54	0	32.107	By MS/MS	By MS/MS	By MS/MS
B3KQV6;P30153;E9PH38;C9J9C1	B3KQV6;P30153;E9PH38	3;3;2;1	3;3;2;1	3;3;2;1	Serine/threonine-protein phosphatase 2A 65 kDa regulatory subunit A alpha isoform	PPP2R1A	tr|B3KQV6|B3KQV6_HUMAN Serine/threonine-protein phosphatase 2A 65 kDa regulatory subunit A alpha isoform OS=Homo sapiens GN=PPP2R1A PE=1 SV=1;sp|P30153|2AAA_HUMAN Serine/threonine-protein phosphatase 2A 65 kDa regulatory subunit A alpha isoform OS=Homo sap	4	3	3	3	0	2	0	1	1	1	2	3	0	0	2	0	1	1	1	2	3	0	0	2	0	1	1	1	2	3	0	9.3	9.3	9.3	45.604	410	410;589;132;395	0	6.8127		By MS/MS
B3KVL5;Q8TBK6;D6RHC2;D6R9G7;G3XAM1	B3KVL5;Q8TBK6;D6RHC2;D6R9G7;G3XAM1	2;2;1;1;1	2;2;1;1;1	2;2;1;1;1	Zinc finger CCHC domain-containing protein 10	ZCCHC10	tr|B3KVL5|B3KVL5_HUMAN Zinc finger CCHC domain-containing protein 10 OS=Homo sapiens GN=ZCCHC10 PE=1 SV=1;sp|Q8TBK6|ZCH10_HUMAN Zinc finger CCHC domain-containing protein 10 OS=Homo sapiens GN=ZCCHC10 PE=1 SV=1;tr|D6RHC2|D6RHC2_HUMAN Zinc finger CCHC domai	5	2	2	2	2	2	2	2	2	2	2	2	2	2	2	2	2	2	2	2	2	2	2	2	2	2	2	2	2	2	2	15.1	15.1	15.1	20.308	186	186;192;92;114;156	0	18.031	By MS/MS	By MS/MS	By MS/MS
H0Y5J4;B4DDD6;Q9UJU6	H0Y5J4;B4DDD6;Q9UJU6	1;1;1	1;1;1	1;1;1	Drebrin-like protein	DBNL	tr|H0Y5J4|H0Y5J4_HUMAN Drebrin-like protein (Fragment) OS=Homo sapiens GN=DBNL PE=1 SV=1;tr|B4DDD6|B4DDD6_HUMAN Drebrin-like protein OS=Homo sapiens GN=DBNL PE=1 SV=1;sp|Q9UJU6|DBNL_HUMAN Drebrin-like protein OS=Homo sapiens GN=DBNL PE=1 SV=1	3	1	1	1	0	0	0	0	0	0	0	1	1	0	0	0	0	0	0	0	1	1	0	0	0	0	0	0	0	1	1	3.1	3.1	3.1	40.16	359	359;406;430	0	3.6753
B4E1C5;B4DDD8;P12081;E7ETE2;B3KWE1;D6RF05	B4E1C5;B4DDD8;P12081;E7ETE2;B3KWE1	4;4;4;3;3;1	4;4;4;3;3;1	4;4;4;3;3;1	Histidine--tRNA ligase, cytoplasmic	HARS	tr|B4E1C5|B4E1C5_HUMAN Histidine--tRNA ligase, cytoplasmic OS=Homo sapiens GN=HARS PE=1 SV=1;tr|B4DDD8|B4DDD8_HUMAN Histidine--tRNA ligase, cytoplasmic OS=Homo sapiens GN=HARS PE=1 SV=1;sp|P12081|SYHC_HUMAN Histidine--tRNA ligase, cytoplasmic OS=Homo sapie	6	4	4	4	0	1	2	1	0	1	1	2	0	0	1	2	1	0	1	1	2	0	0	1	2	1	0	1	1	2	0	12.9	12.9	12.9	43.878	395	395;435;509;288;440;60	0	6.7825		By matching	By MS/MS
B4DDN1;P47897;A0A0U1RQX9;A0A0U1RRC8;A0A0U1RQX5;A0A0U1RQQ5;H7C0R3	B4DDN1;P47897;A0A0U1RQX9;A0A0U1RRC8;A0A0U1RQX5;A0A0U1RQQ5;H7C0R3	2;2;1;1;1;1;1	2;2;1;1;1;1;1	2;2;1;1;1;1;1	Glutamine--tRNA ligase	QARS	tr|B4DDN1|B4DDN1_HUMAN Glutamine--tRNA ligase OS=Homo sapiens GN=QARS PE=1 SV=1;sp|P47897|SYQ_HUMAN Glutamine--tRNA ligase OS=Homo sapiens GN=QARS PE=1 SV=1;tr|A0A0U1RQX9|A0A0U1RQX9_HUMAN Glutamine--tRNA ligase (Fragment) OS=Homo sapiens GN=QARS PE=1 SV=1;	7	2	2	2	0	1	1	1	0	0	0	1	1	0	1	1	1	0	0	0	1	1	0	1	1	1	0	0	0	1	1	3	3	3	71.738	630	630;775;83;91;134;195;253	0	3.2886		By matching	By MS/MS
K7EMV3;K7EP01;B4DEB1;K7EK07;Q5TEC6;K7ES00;Q6NXT2;Q71DI3;Q16695;P84243;P68431	K7EMV3;K7EP01;B4DEB1;K7EK07;Q5TEC6;K7ES00;Q6NXT2;Q71DI3;Q16695;P84243;P68431	1;1;1;1;1;1;1;1;1;1;1	1;1;1;1;1;1;1;1;1;1;1	1;1;1;1;1;1;1;1;1;1;1	Histone H3;Histone H3.3C;Histone H3.2;Histone H3.1t;Histone H3.3;Histone H3.1	H3F3B;H3F3A;HIST2H3PS2;H3F3C;HIST2H3A;HIST3H3;HIST1H3A	tr|K7EMV3|K7EMV3_HUMAN Histone H3 OS=Homo sapiens GN=H3F3B PE=1 SV=1;tr|K7EP01|K7EP01_HUMAN Histone H3.3 OS=Homo sapiens GN=H3F3B PE=1 SV=1;tr|B4DEB1|B4DEB1_HUMAN Histone H3 OS=Homo sapiens GN=H3F3A PE=1 SV=1;tr|K7EK07|K7EK07_HUMAN Histone H3 (Fragment) OS	11	1	1	1	0	0	0	0	0	1	1	0	1	0	0	0	0	0	1	1	0	1	0	0	0	0	0	1	1	0	1	7.6	7.6	7.6	10.334	92	92;113;123;132;136;151;135;136;136;136;136	0.0027051	2.8724
B4DJV2;O75390;F8VTT8;F8W4S1;A0A0C4DGI3;F8W642;F8W0J2;F8VZK9;F8VP03;F8VX07;F8VRP1;F8VX68;H0YIC4;F8VWQ5;F8VPF9;F8VU34;F8VPA1;F8VR34;F8W1S4;H0YH82;F8W031	B4DJV2;O75390;F8VTT8;F8W4S1;A0A0C4DGI3	3;3;2;2;2;1;1;1;1;1;1;1;1;1;1;1;1;1;1;1;1	3;3;2;2;2;1;1;1;1;1;1;1;1;1;1;1;1;1;1;1;1	3;3;2;2;2;1;1;1;1;1;1;1;1;1;1;1;1;1;1;1;1	Citrate synthase;Citrate synthase, mitochondrial	CS	tr|B4DJV2|B4DJV2_HUMAN Citrate synthase OS=Homo sapiens GN=CS PE=1 SV=1;sp|O75390|CISY_HUMAN Citrate synthase, mitochondrial OS=Homo sapiens GN=CS PE=1 SV=2;tr|F8VTT8|F8VTT8_HUMAN Citrate synthase, mitochondrial (Fragment) OS=Homo sapiens GN=CS PE=1 SV=1;t	21	3	3	3	2	1	1	1	1	1	1	2	2	2	1	1	1	1	1	1	2	2	2	1	1	1	1	1	1	2	2	7.9	7.9	7.9	50.431	453	453;466;149;178;400;66;75;81;105;114;118;120;123;132;141;142;144;146;157;190;263	0	6.262	By MS/MS	By MS/MS	By MS/MS
B4DKY1;P49589	B4DKY1;P49589	2;2	2;2	2;2	Cysteine--tRNA ligase, cytoplasmic	CARS	tr|B4DKY1|B4DKY1_HUMAN Cysteine--tRNA ligase, cytoplasmic OS=Homo sapiens GN=CARS PE=1 SV=1;sp|P49589|SYCC_HUMAN Cysteine--tRNA ligase, cytoplasmic OS=Homo sapiens GN=CARS PE=1 SV=3	2	2	2	2	1	1	0	1	2	0	1	2	1	1	1	0	1	2	0	1	2	1	1	1	0	1	2	0	1	2	1	3.5	3.5	3.5	84.277	739	739;748	0	4.4649	By matching	By matching
Q5JV99;Q5JV98;H0Y630;Q8NBY1;B4DR80;B4E0Y9;Q9P289;Q9Y6E0	Q5JV99;Q5JV98;H0Y630;Q8NBY1;B4DR80;B4E0Y9;Q9P289;Q9Y6E0	1;1;1;1;1;1;1;1	1;1;1;1;1;1;1;1	1;1;1;1;1;1;1;1	Serine/threonine-protein kinase 26;Serine/threonine-protein kinase 24;Serine/threonine-protein kinase 24 36 kDa subunit;Serine/threonine-protein kinase 24 12 kDa subunit	STK24;STK26	tr|Q5JV99|Q5JV99_HUMAN Serine/threonine-protein kinase 24 (Fragment) OS=Homo sapiens GN=STK24 PE=1 SV=1;tr|Q5JV98|Q5JV98_HUMAN Serine/threonine-protein kinase 24 (Fragment) OS=Homo sapiens GN=STK24 PE=1 SV=1;tr|H0Y630|H0Y630_HUMAN Serine/threonine-protein	8	1	1	1	0	0	0	0	0	1	0	0	0	0	0	0	0	0	1	0	0	0	0	0	0	0	0	1	0	0	0	7	7	7	15.768	142	142;209;369;392;412;438;416;443	0.004344	2.5811
F8WF04;F8WCI9;B4DWJ3;Q96CJ1	F8WF04;F8WCI9;B4DWJ3;Q96CJ1	2;2;2;2	1;1;1;1	1;1;1;1	ELL-associated factor 2	EAF2	tr|F8WF04|F8WF04_HUMAN ELL-associated factor 2 OS=Homo sapiens GN=EAF2 PE=4 SV=1;tr|F8WCI9|F8WCI9_HUMAN ELL-associated factor 2 OS=Homo sapiens GN=EAF2 PE=4 SV=1;tr|B4DWJ3|B4DWJ3_HUMAN ELL-associated factor 2 OS=Homo sapiens GN=EAF2 PE=1 SV=1;sp|Q96CJ1|EAF	4	2	1	1	1	2	1	1	1	1	0	1	0	0	1	0	0	0	0	0	0	0	0	1	0	0	0	0	0	0	0	54.3	34.3	34.3	4.0746	35	35;68;263;260	0	4.9353	By matching	By MS/MS	By matching
B4DWR3;P61758	B4DWR3;P61758	2;2	2;2	2;2	Prefoldin subunit 3	VBP1	tr|B4DWR3|B4DWR3_HUMAN Prefoldin subunit 3 OS=Homo sapiens GN=VBP1 PE=1 SV=1;sp|P61758|PFD3_HUMAN Prefoldin subunit 3 OS=Homo sapiens GN=VBP1 PE=1 SV=3	2	2	2	2	2	2	2	2	1	2	2	2	2	2	2	2	2	1	2	2	2	2	2	2	2	2	1	2	2	2	2	12	12	12	22.254	192	192;197	0	5.7293	By matching	By MS/MS	By MS/MS
B4DY09;Q12905;X6R6Z1;A0A0A0MRL0	B4DY09;Q12905;X6R6Z1;A0A0A0MRL0	4;4;3;2	4;4;3;2	4;4;3;2	Interleukin enhancer-binding factor 2	ILF2	tr|B4DY09|B4DY09_HUMAN Interleukin enhancer-binding factor 2 OS=Homo sapiens GN=ILF2 PE=1 SV=1;sp|Q12905|ILF2_HUMAN Interleukin enhancer-binding factor 2 OS=Homo sapiens GN=ILF2 PE=1 SV=2;tr|X6R6Z1|X6R6Z1_HUMAN Interleukin enhancer-binding factor 2 (Fragme	4	4	4	4	3	3	4	4	3	1	3	4	3	3	3	4	4	3	1	3	4	3	3	3	4	4	3	1	3	4	3	17.6	17.6	17.6	38.91	352	352;390;115;150	0	12.711	By MS/MS	By MS/MS	By MS/MS
B4DYP1;O94760	B4DYP1;O94760	2;2	2;2	2;2	N(G),N(G)-dimethylarginine dimethylaminohydrolase 1	DDAH1	tr|B4DYP1|B4DYP1_HUMAN N(G),N(G)-dimethylarginine dimethylaminohydrolase 1 OS=Homo sapiens GN=DDAH1 PE=1 SV=1;sp|O94760|DDAH1_HUMAN N(G),N(G)-dimethylarginine dimethylaminohydrolase 1 OS=Homo sapiens GN=DDAH1 PE=1 SV=3	2	2	2	2	1	0	2	2	2	1	2	0	1	1	0	2	2	2	1	2	0	1	1	0	2	2	2	1	2	0	1	17.3	17.3	17.3	20.535	185	185;285	0.0018399	3.0295	By MS/MS		By matching
C9J2Q4;B5MCX3;Q15019;B5MD47;C9IY94;C9IZU3;C9JQJ4;C9J938;C9JB25;C9JFT1;F8WB65;C9JZI2;H7C310;H7C2Y0	C9J2Q4;B5MCX3;Q15019;B5MD47;C9IY94;C9IZU3;C9JQJ4;C9J938;C9JB25	3;3;3;2;2;2;2;2;2;1;1;1;1;1	3;3;3;2;2;2;2;2;2;1;1;1;1;1	3;3;3;2;2;2;2;2;2;1;1;1;1;1	Septin-2	2019-09-02	tr|C9J2Q4|C9J2Q4_HUMAN Septin-2 (Fragment) OS=Homo sapiens GN=SEPT2 PE=1 SV=1;tr|B5MCX3|B5MCX3_HUMAN Septin-2 OS=Homo sapiens GN=SEPT2 PE=1 SV=1;sp|Q15019|SEPT2_HUMAN Septin-2 OS=Homo sapiens GN=SEPT2 PE=1 SV=1;tr|B5MD47|B5MD47_HUMAN Septin-2 (Fragment) OS	14	3	3	3	2	3	3	3	3	3	3	3	2	2	3	3	3	3	3	3	3	2	2	3	3	3	3	3	3	3	2	23.4	23.4	23.4	21.087	184	184;321;361;94;121;131;147;148;173;72;80;105;161;188	0	10.816	By MS/MS	By MS/MS	By MS/MS
B5MD38;F5GZQ3;P55084	B5MD38;F5GZQ3;P55084	1;1;1	1;1;1	1;1;1	Trifunctional enzyme subunit beta, mitochondrial;3-ketoacyl-CoA thiolase	HADHB	tr|B5MD38|B5MD38_HUMAN Trifunctional enzyme subunit beta, mitochondrial OS=Homo sapiens GN=HADHB PE=1 SV=1;tr|F5GZQ3|F5GZQ3_HUMAN Trifunctional enzyme subunit beta, mitochondrial OS=Homo sapiens GN=HADHB PE=1 SV=1;sp|P55084|ECHB_HUMAN Trifunctional enzyme	3	1	1	1	0	0	1	0	0	0	1	1	0	0	0	1	0	0	0	1	1	0	0	0	1	0	0	0	1	1	0	3.7	3.7	3.7	37.924	351	351;459;474	0	3.1295			By MS/MS
B5MDF5;P62826;J3KQE5;F5H018;H0YFC6;B4DV51;A0A087X0W0	B5MDF5;P62826;J3KQE5;F5H018	9;9;8;7;4;4;1	9;9;8;7;4;4;1	9;9;8;7;4;4;1	GTP-binding nuclear protein Ran	RAN	tr|B5MDF5|B5MDF5_HUMAN GTP-binding nuclear protein Ran OS=Homo sapiens GN=RAN PE=1 SV=1;sp|P62826|RAN_HUMAN GTP-binding nuclear protein Ran OS=Homo sapiens GN=RAN PE=1 SV=3;tr|J3KQE5|J3KQE5_HUMAN GTP-binding nuclear protein Ran (Fragment) OS=Homo sapiens G	7	9	9	9	8	7	8	8	8	8	8	8	8	8	7	8	8	8	8	8	8	8	8	7	8	8	8	8	8	8	8	41.2	41.2	41.2	26.224	233	233;216;234;199;103;128;53	0	44.562	By MS/MS	By MS/MS	By MS/MS
B7WPG3;C9IYN3;D6W592;Q8WVV9;C9JJZ7;H7BXH8	B7WPG3;C9IYN3;D6W592;Q8WVV9;C9JJZ7;H7BXH8	2;2;2;2;1;1	2;2;2;2;1;1	2;2;2;2;1;1	Heterogeneous nuclear ribonucleoprotein L-like	HNRNPLL;HNRPLL	tr|B7WPG3|B7WPG3_HUMAN Heterogeneous nuclear ribonucleoprotein L-like OS=Homo sapiens GN=HNRNPLL PE=1 SV=1;tr|C9IYN3|C9IYN3_HUMAN Heterogeneous nuclear ribonucleoprotein L-like OS=Homo sapiens GN=HNRNPLL PE=1 SV=2;tr|D6W592|D6W592_HUMAN Heterogeneous nucle	6	2	2	2	2	1	1	2	2	1	1	1	2	2	1	1	2	2	1	1	1	2	2	1	1	2	2	1	1	1	2	5.7	5.7	5.7	56.45	508	508;537;542;542;149;217	0	3.9724	By matching	By matching	By matching
C9J2P0;H7C061;B7Z306;P51965;A0A087X283;R4GND1;Q96LR5;Q969T4	C9J2P0;H7C061;B7Z306;P51965;A0A087X283;R4GND1;Q96LR5;Q969T4	2;2;2;2;1;1;1;1	2;2;2;2;1;1;1;1	2;2;2;2;1;1;1;1	Ubiquitin-conjugating enzyme E2 E1;Ubiquitin-conjugating enzyme E2 E2;Ubiquitin-conjugating enzyme E2 E3	UBE2E1;UBE2E2;UBE2E3	tr|C9J2P0|C9J2P0_HUMAN Ubiquitin-conjugating enzyme E2 E1 (Fragment) OS=Homo sapiens GN=UBE2E1 PE=1 SV=1;tr|H7C061|H7C061_HUMAN Ubiquitin-conjugating enzyme E2 E1 (Fragment) OS=Homo sapiens GN=UBE2E1 PE=1 SV=1;tr|B7Z306|B7Z306_HUMAN Ubiquitin-conjugating e	8	2	2	2	1	1	1	1	1	1	1	2	1	1	1	1	1	1	1	1	2	1	1	1	1	1	1	1	1	2	1	19.7	19.7	19.7	16.21	147	147;151;167;193;94;175;201;207	0	5.1985	By matching	By matching	By MS/MS
F5H7S3;H7BYY1;B7Z596;H0YK48;H0YNC7;H0YK20;H0YL42;H0YN06	F5H7S3;H7BYY1;B7Z596;H0YK48;H0YNC7	10;10;10;8;6;4;4;1	5;5;5;3;1;3;3;1	2;2;2;2;0;0;0;1		TPM1	tr|F5H7S3|F5H7S3_HUMAN Tropomyosin alpha-1 chain OS=Homo sapiens GN=TPM1 PE=1 SV=2;tr|H7BYY1|H7BYY1_HUMAN Tropomyosin 1 (Alpha), isoform CRA_m OS=Homo sapiens GN=TPM1 PE=1 SV=1;tr|B7Z596|B7Z596_HUMAN Tropomyosin alpha-1 chain OS=Homo sapiens GN=TPM1 PE=1 S	8	10	5	2	7	8	8	9	10	9	9	9	9	2	3	3	4	5	4	4	4	4	1	1	1	2	2	2	2	2	2	36.3	20.8	9.8	28.524	245	245;248;275;248;223;92;108;49	0	14.945	By matching	By MS/MS	By matching
B7Z7P8;P62495;D6RCB3;D6RJE8;I3L492	B7Z7P8;P62495	3;3;1;1;1	3;3;1;1;1	3;3;1;1;1	Eukaryotic peptide chain release factor subunit 1	ETF1	tr|B7Z7P8|B7Z7P8_HUMAN Eukaryotic peptide chain release factor subunit 1 OS=Homo sapiens GN=ETF1 PE=1 SV=1;sp|P62495|ERF1_HUMAN Eukaryotic peptide chain release factor subunit 1 OS=Homo sapiens GN=ETF1 PE=1 SV=3	5	3	3	3	1	1	3	1	1	2	2	2	2	1	1	3	1	1	2	2	2	2	1	1	3	1	1	2	2	2	2	8.5	8.5	8.5	47.475	423	423;437;95;120;208	0	5.8811	By matching	By matching	By MS/MS
B8ZZQ6;P06454;B8ZZA1;B8ZZW7;H7C2N1;A0A087WUT1	B8ZZQ6;P06454;B8ZZA1;B8ZZW7;H7C2N1;A0A087WUT1	4;4;3;3;3;2	4;4;3;3;3;2	4;4;3;3;3;2	Prothymosin alpha;Prothymosin alpha, N-terminally processed;Thymosin alpha-1	PTMA	tr|B8ZZQ6|B8ZZQ6_HUMAN Prothymosin alpha OS=Homo sapiens GN=PTMA PE=1 SV=1;sp|P06454|PTMA_HUMAN Prothymosin alpha OS=Homo sapiens GN=PTMA PE=1 SV=2;tr|B8ZZA1|B8ZZA1_HUMAN Prothymosin alpha OS=Homo sapiens GN=PTMA PE=1 SV=1;tr|B8ZZW7|B8ZZW7_HUMAN Prothymosi	6	4	4	4	4	3	4	4	4	4	4	3	4	4	3	4	4	4	4	4	3	4	4	3	4	4	4	4	4	3	4	35.5	35.5	35.5	11.758	107	107;111;131;136;148;135	0	19.813	By MS/MS	By MS/MS	By MS/MS
B8ZZT4;Q9BV40	B8ZZT4;Q9BV40	2;2	2;2	2;2	Vesicle-associated membrane protein 8	VAMP8	tr|B8ZZT4|B8ZZT4_HUMAN Vesicle-associated membrane protein 8 OS=Homo sapiens GN=VAMP8 PE=1 SV=1;sp|Q9BV40|VAMP8_HUMAN Vesicle-associated membrane protein 8 OS=Homo sapiens GN=VAMP8 PE=1 SV=1	2	2	2	2	2	2	1	2	1	2	0	2	0	2	2	1	2	1	2	0	2	0	2	2	1	2	1	2	0	2	0	19.2	19.2	19.2	11.191	99	99;100	0	3.5823	By MS/MS	By MS/MS	By matching
B8ZZU8;I3L0M9;Q15370	B8ZZU8;I3L0M9;Q15370	2;2;2	2;2;2	2;2;2	Transcription elongation factor B polypeptide 2	TCEB2	tr|B8ZZU8|B8ZZU8_HUMAN Transcription elongation factor B (SIII), polypeptide 2 (18kDa, elongin B), isoform CRA_b OS=Homo sapiens GN=TCEB2 PE=1 SV=1;tr|I3L0M9|I3L0M9_HUMAN Transcription elongation factor B polypeptide 2 (Fragment) OS=Homo sapiens GN=TCEB2 P	3	2	2	2	1	0	2	1	0	0	0	1	1	1	0	2	1	0	0	0	1	1	1	0	2	1	0	0	0	1	1	22.1	22.1	22.1	12.527	113	113;140;118	0	4.8653	By matching		By MS/MS
F8WCJ3;B8ZZX4;O14530;F8WBV5;G3XAJ4	F8WCJ3;B8ZZX4;O14530;F8WBV5;G3XAJ4	2;2;2;1;1	2;2;2;1;1	2;2;2;1;1	Thioredoxin domain-containing protein 9	TXNDC9	tr|F8WCJ3|F8WCJ3_HUMAN Thioredoxin domain-containing protein 9 OS=Homo sapiens GN=TXNDC9 PE=1 SV=1;tr|B8ZZX4|B8ZZX4_HUMAN Thioredoxin domain-containing protein 9 (Fragment) OS=Homo sapiens GN=TXNDC9 PE=1 SV=1;sp|O14530|TXND9_HUMAN Thioredoxin domain-contai	5	2	2	2	1	1	1	1	1	1	0	1	2	1	1	1	1	1	1	0	1	2	1	1	1	1	1	1	0	1	2	14.8	14.8	14.8	14.412	122	122;135;226;64;74	0	5.6017	By matching	By matching	By matching
B9A041;P40925;B8ZZ51;C9JF79;C9JRL4	B9A041;P40925;B8ZZ51;C9JF79	4;4;3;3;1	4;4;3;3;1	4;4;3;3;1	Malate dehydrogenase, cytoplasmic;Malate dehydrogenase	MDH1	tr|B9A041|B9A041_HUMAN Malate dehydrogenase, cytoplasmic OS=Homo sapiens GN=MDH1 PE=1 SV=1;sp|P40925|MDHC_HUMAN Malate dehydrogenase, cytoplasmic OS=Homo sapiens GN=MDH1 PE=1 SV=4;tr|B8ZZ51|B8ZZ51_HUMAN Malate dehydrogenase, cytoplasmic OS=Homo sapiens GN=	5	4	4	4	4	4	4	3	4	4	4	3	4	4	4	4	3	4	4	4	3	4	4	4	4	3	4	4	4	3	4	27.6	27.6	27.6	23.038	210	210;334;169;222;120	0	19.136	By MS/MS	By MS/MS	By MS/MS
B9ZVT1;Q8IXT5	B9ZVT1;Q8IXT5	2;2	2;2	2;2	RNA-binding protein 12B	RBM12B	tr|B9ZVT1|B9ZVT1_HUMAN RNA-binding protein 12B OS=Homo sapiens GN=RBM12B PE=1 SV=2;sp|Q8IXT5|RB12B_HUMAN RNA-binding protein 12B OS=Homo sapiens GN=RBM12B PE=1 SV=2	2	2	2	2	2	1	2	1	0	1	0	1	1	2	1	2	1	0	1	0	1	1	2	1	2	1	0	1	0	1	1	2.2	2.2	2.2	102.7	881	881;1001	0	4.9388	By MS/MS	By MS/MS	By MS/MS
C9IZG4;O60888	C9IZG4;O60888	1;1	1;1	1;1	Protein CutA	CUTA	tr|C9IZG4|C9IZG4_HUMAN Protein CutA OS=Homo sapiens GN=CUTA PE=1 SV=1;sp|O60888|CUTA_HUMAN Protein CutA OS=Homo sapiens GN=CUTA PE=1 SV=2	2	1	1	1	1	0	1	0	1	1	1	1	1	1	0	1	0	1	1	1	1	1	1	0	1	0	1	1	1	1	1	10.4	10.4	10.4	14.401	135	135;179	0	3.3209	By MS/MS		By MS/MS
C9J0E4;P01040	C9J0E4;P01040	3;3	3;3	3;3	Cystatin-A;Cystatin-A, N-terminally processed	CSTA	tr|C9J0E4|C9J0E4_HUMAN Cystatin-A OS=Homo sapiens GN=CSTA PE=1 SV=1;sp|P01040|CYTA_HUMAN Cystatin-A OS=Homo sapiens GN=CSTA PE=1 SV=1	2	3	3	3	3	3	3	3	2	3	3	3	2	3	3	3	3	2	3	3	3	2	3	3	3	3	2	3	3	3	2	49.2	49.2	49.2	7.0861	63	63;98	0	6.5048	By MS/MS	By MS/MS	By MS/MS
D6RBD7;C9J1V9;O43324	D6RBD7;C9J1V9;O43324	1;1;1	1;1;1	1;1;1	Eukaryotic translation elongation factor 1 epsilon-1	EEF1E1;EEF1E1-BLOC1S5	tr|D6RBD7|D6RBD7_HUMAN Eukaryotic translation elongation factor 1 epsilon-1 OS=Homo sapiens GN=EEF1E1 PE=4 SV=1;tr|C9J1V9|C9J1V9_HUMAN HCG2043275 OS=Homo sapiens GN=EEF1E1-BLOC1S5 PE=4 SV=2;sp|O43324|MCA3_HUMAN Eukaryotic translation elongation factor 1 ep	3	1	1	1	1	1	1	1	0	1	0	1	0	1	1	1	1	0	1	0	1	0	1	1	1	1	0	1	0	1	0	7.3	7.3	7.3	16.686	150	150;151;174	0	3.5922	By MS/MS	By MS/MS	By MS/MS
C9JRH2;C9JMJ4;C9J3R0;C9JQZ4;C9JW69;P18754	C9JRH2;C9JMJ4;C9J3R0;C9JQZ4;C9JW69;P18754	2;2;2;2;2;2	2;2;2;2;2;2	2;2;2;2;2;2	Regulator of chromosome condensation	RCC1	tr|C9JRH2|C9JRH2_HUMAN Regulator of chromosome condensation (Fragment) OS=Homo sapiens GN=RCC1 PE=1 SV=1;tr|C9JMJ4|C9JMJ4_HUMAN Regulator of chromosome condensation (Fragment) OS=Homo sapiens GN=RCC1 PE=1 SV=1;tr|C9J3R0|C9J3R0_HUMAN Regulator of chromosome	6	2	2	2	0	0	2	1	0	0	1	2	0	0	0	2	1	0	0	1	2	0	0	0	2	1	0	0	1	2	0	10.9	10.9	10.9	24.465	230	230;272;273;283;372;421	0	3.539			By MS/MS
C9J4Z3;P61513;M0R0A1;Q6P4E4;E9PEL3;M0R2L6;G5E9R3;A6NKH3	C9J4Z3;P61513;M0R0A1;Q6P4E4;E9PEL3;M0R2L6	3;3;2;2;2;2;1;1	3;3;2;2;2;2;1;1	3;3;2;2;2;2;1;1	60S ribosomal protein L37a	RPL37A	tr|C9J4Z3|C9J4Z3_HUMAN 60S ribosomal protein L37a OS=Homo sapiens GN=RPL37A PE=1 SV=1;sp|P61513|RL37A_HUMAN 60S ribosomal protein L37a OS=Homo sapiens GN=RPL37A PE=1 SV=2;tr|M0R0A1|M0R0A1_HUMAN 60S ribosomal protein L37a OS=Homo sapiens GN=RPL37A PE=1 SV=1	8	3	3	3	3	3	3	3	3	3	2	3	3	3	3	3	3	3	3	2	3	3	3	3	3	3	3	3	2	3	3	55.9	55.9	55.9	7.624	68	68;92;60;72;75;88;58;93	0	8.9141	By MS/MS	By MS/MS	By MS/MS
E9PKT8;C9J6D1;C9JZI7;Q99733;E9PNW0;E9PJJ2;E9PS34;E9PNJ7;A8MXH2;E9PKI2;C9J1B1;E9PP22;H0YCI4	E9PKT8;C9J6D1;C9JZI7;Q99733;E9PNW0;E9PJJ2;E9PS34;E9PNJ7;A8MXH2	4;4;4;4;3;3;3;3;3;1;1;1;1	3;3;3;3;2;2;2;2;2;1;1;1;1	3;3;3;3;2;2;2;2;2;1;1;1;1	Nucleosome assembly protein 1-like 4	NAP1L4	tr|E9PKT8|E9PKT8_HUMAN Nucleosome assembly protein 1-like 4 (Fragment) OS=Homo sapiens GN=NAP1L4 PE=1 SV=1;tr|C9J6D1|C9J6D1_HUMAN Nucleosome assembly protein 1-like 4 (Fragment) OS=Homo sapiens GN=NAP1L4 PE=1 SV=1;tr|C9JZI7|C9JZI7_HUMAN Nucleosome assembly	13	4	3	3	3	3	4	3	4	4	3	4	4	2	2	3	2	3	3	2	3	3	2	2	3	2	3	3	2	3	3	29.6	23.7	23.7	19.156	169	169;178;278;375;107;128;133;140;156;78;101;154;204	0	9.0918	By matching	By MS/MS	By MS/MS
C9J813;E9PGZ1;E7EX44;Q05682	C9J813;E9PGZ1;E7EX44;Q05682	3;3;3;3	3;3;3;3	3;3;3;3	Caldesmon	CALD1	tr|C9J813|C9J813_HUMAN Caldesmon (Fragment) OS=Homo sapiens GN=CALD1 PE=1 SV=1;tr|E9PGZ1|E9PGZ1_HUMAN Caldesmon OS=Homo sapiens GN=CALD1 PE=1 SV=1;tr|E7EX44|E7EX44_HUMAN Caldesmon OS=Homo sapiens GN=CALD1 PE=1 SV=1;sp|Q05682|CALD1_HUMAN Caldesmon OS=Homo s	4	3	3	3	3	3	2	2	2	3	2	2	3	3	3	2	2	2	3	2	2	3	3	3	2	2	2	3	2	2	3	8.9	8.9	8.9	54.158	459	459;536;557;793	0	9.0598	By MS/MS	By MS/MS	By MS/MS
C9J8M6;P33993	C9J8M6;P33993	1;1	1;1	1;1	DNA replication licensing factor MCM7	MCM7	tr|C9J8M6|C9J8M6_HUMAN DNA replication licensing factor MCM7 (Fragment) OS=Homo sapiens GN=MCM7 PE=1 SV=1;sp|P33993|MCM7_HUMAN DNA replication licensing factor MCM7 OS=Homo sapiens GN=MCM7 PE=1 SV=4	2	1	1	1	0	0	1	1	0	0	0	1	0	0	0	1	1	0	0	0	1	0	0	0	1	1	0	0	0	1	0	6.6	6.6	6.6	20.764	183	183;719	0	3.8126			By MS/MS
C9JA28;Q9UNL2	C9JA28;Q9UNL2	1;1	1;1	1;1	Translocon-associated protein subunit gamma	SSR3	tr|C9JA28|C9JA28_HUMAN Translocon-associated protein subunit gamma OS=Homo sapiens GN=SSR3 PE=1 SV=1;sp|Q9UNL2|SSRG_HUMAN Translocon-associated protein subunit gamma OS=Homo sapiens GN=SSR3 PE=1 SV=1	2	1	1	1	1	1	1	1	0	0	0	1	1	1	1	1	1	0	0	0	1	1	1	1	1	1	0	0	0	1	1	8	8	8	20.161	174	174;185	0	3.7423	By MS/MS	By MS/MS	By MS/MS
C9JA36;P54709;H7C4L9;C9JXZ1	C9JA36;P54709;H7C4L9;C9JXZ1	2;2;1;1	2;2;1;1	2;2;1;1	Sodium/potassium-transporting ATPase subunit beta-3	ATP1B3	tr|C9JA36|C9JA36_HUMAN Sodium/potassium-transporting ATPase subunit beta-3 (Fragment) OS=Homo sapiens GN=ATP1B3 PE=1 SV=1;sp|P54709|AT1B3_HUMAN Sodium/potassium-transporting ATPase subunit beta-3 OS=Homo sapiens GN=ATP1B3 PE=1 SV=1;tr|H7C4L9|H7C4L9_HUMAN S	4	2	2	2	2	1	2	2	2	2	0	2	2	2	1	2	2	2	2	0	2	2	2	1	2	2	2	2	0	2	2	16.5	16.5	16.5	14.968	133	133;279;27;119	0	5.8671	By MS/MS	By matching	By MS/MS
U3KPT1;C9JDJ7	U3KPT1;C9JDJ7	2;2	1;1	1;1		U2SURP	tr|U3KPT1|U3KPT1_HUMAN U2 snRNP-associated SURP motif-containing protein (Fragment) OS=Homo sapiens GN=U2SURP PE=1 SV=1;tr|C9JDJ7|C9JDJ7_HUMAN U2 snRNP-associated SURP motif-containing protein (Fragment) OS=Homo sapiens GN=U2SURP PE=1 SV=7	2	2	1	1	2	2	2	2	2	2	2	2	2	1	1	1	1	1	1	1	1	1	1	1	1	1	1	1	1	1	1	21.6	11.2	11.2	14.104	125	125;131	0	3.5636	By MS/MS	By MS/MS	By MS/MS
C9JDR0;Q15738	C9JDR0;Q15738	2;2	2;2	2;2	Sterol-4-alpha-carboxylate 3-dehydrogenase, decarboxylating	NSDHL	tr|C9JDR0|C9JDR0_HUMAN Sterol-4-alpha-carboxylate 3-dehydrogenase, decarboxylating (Fragment) OS=Homo sapiens GN=NSDHL PE=1 SV=1;sp|Q15738|NSDHL_HUMAN Sterol-4-alpha-carboxylate 3-dehydrogenase, decarboxylating OS=Homo sapiens GN=NSDHL PE=1 SV=2	2	2	2	2	0	1	2	1	1	0	1	2	0	0	1	2	1	1	0	1	2	0	0	1	2	1	1	0	1	2	0	7.5	7.5	7.5	28.146	254	254;373	0.0035149	2.6475		By matching	By MS/MS
C9JFR7;P99999;CON__P62894	C9JFR7;P99999	3;3;1	3;3;1	3;3;1	Cytochrome c	CYCS	tr|C9JFR7|C9JFR7_HUMAN Cytochrome c (Fragment) OS=Homo sapiens GN=CYCS PE=1 SV=1;sp|P99999|CYC_HUMAN Cytochrome c OS=Homo sapiens GN=CYCS PE=1 SV=2	3	3	3	3	3	2	3	3	1	1	3	3	2	3	2	3	3	1	1	3	3	2	3	2	3	3	1	1	3	3	2	32.7	32.7	32.7	11.333	101	101;105;105	0	9.685	By MS/MS	By MS/MS	By MS/MS
C9JLK2;H7C393;H7C1U0;C9JIF9;P13798	C9JLK2;H7C393;H7C1U0;C9JIF9;P13798	1;1;1;1;1	1;1;1;1;1	1;1;1;1;1	Acylamino-acid-releasing enzyme	APEH	tr|C9JLK2|C9JLK2_HUMAN Acylamino-acid-releasing enzyme (Fragment) OS=Homo sapiens GN=APEH PE=1 SV=1;tr|H7C393|H7C393_HUMAN Acylamino-acid-releasing enzyme (Fragment) OS=Homo sapiens GN=APEH PE=1 SV=1;tr|H7C1U0|H7C1U0_HUMAN Acylamino-acid-releasing enzyme (	5	1	1	1	1	1	1	0	0	1	1	1	0	1	1	1	0	0	1	1	1	0	1	1	1	0	0	1	1	1	0	5.6	5.6	5.6	26.028	232	232;284;308;737;732	0.004363	2.6066	By MS/MS	By matching	By matching
C9JJT5;C9JU26;G3V325;P56134	C9JJT5;C9JU26;G3V325;P56134	2;2;2;2	2;2;2;2	2;2;2;2	ATP synthase subunit f, mitochondrial	ATP5J2-PTCD1;ATP5J2	tr|C9JJT5|C9JJT5_HUMAN Protein ATP5J2-PTCD1 OS=Homo sapiens GN=ATP5J2-PTCD1 PE=4 SV=2;tr|C9JU26|C9JU26_HUMAN ATP synthase subunit f, mitochondrial OS=Homo sapiens GN=ATP5J2 PE=1 SV=1;tr|G3V325|G3V325_HUMAN Protein ATP5J2-PTCD1 OS=Homo sapiens GN=ATP5J2-PTC	4	2	2	2	1	0	1	2	1	1	0	1	1	1	0	1	2	1	1	0	1	1	1	0	1	2	1	1	0	1	1	44.4	44.4	44.4	5.9149	54	54;98;749;94	0	5.3868	By matching		By MS/MS
C9JXB8;C9JNW5;P83731	C9JXB8;C9JNW5;P83731	6;6;6	6;6;6	6;6;6	60S ribosomal protein L24	RPL24	tr|C9JXB8|C9JXB8_HUMAN 60S ribosomal protein L24 OS=Homo sapiens GN=RPL24 PE=1 SV=1;tr|C9JNW5|C9JNW5_HUMAN 60S ribosomal protein L24 OS=Homo sapiens GN=RPL24 PE=1 SV=1;sp|P83731|RL24_HUMAN 60S ribosomal protein L24 OS=Homo sapiens GN=RPL24 PE=1 SV=1	3	6	6	6	6	6	6	6	6	6	5	6	6	6	6	6	6	6	6	5	6	6	6	6	6	6	6	6	5	6	6	38.8	38.8	38.8	14.369	121	121;150;157	0	21.409	By MS/MS	By MS/MS	By MS/MS
C9JRJ5;Q9UGP4	C9JRJ5;Q9UGP4	1;1	1;1	1;1	LIM domain-containing protein 1	LIMD1	tr|C9JRJ5|C9JRJ5_HUMAN LIM domain-containing protein 1 OS=Homo sapiens GN=LIMD1 PE=1 SV=1;sp|Q9UGP4|LIMD1_HUMAN LIM domain-containing protein 1 OS=Homo sapiens GN=LIMD1 PE=1 SV=1	2	1	1	1	1	0	0	1	1	0	0	1	1	1	0	0	1	1	0	0	1	1	1	0	0	1	1	0	0	1	1	2.9	2.9	2.9	65.534	620	620;676	0.0027003	2.8312	By matching
C9JRZ6;F8WAR4;Q9NX63	C9JRZ6;F8WAR4;Q9NX63	3;3;3	3;3;3	3;3;3	MICOS complex subunit MIC19	CHCHD3	tr|C9JRZ6|C9JRZ6_HUMAN MICOS complex subunit OS=Homo sapiens GN=CHCHD3 PE=1 SV=1;tr|F8WAR4|F8WAR4_HUMAN MICOS complex subunit OS=Homo sapiens GN=CHCHD3 PE=1 SV=1;sp|Q9NX63|MIC19_HUMAN MICOS complex subunit MIC19 OS=Homo sapiens GN=CHCHD3 PE=1 SV=1	3	3	3	3	1	0	2	1	1	2	0	2	1	1	0	2	1	1	2	0	2	1	1	0	2	1	1	2	0	2	1	15.1	15.1	15.1	26.694	232	232;241;227	0	6.336	By MS/MS		By MS/MS
C9JU14;J3KR73;Q9NRW1;P20340;C9JB90;Q14964	C9JU14;J3KR73;Q9NRW1;P20340;C9JB90;Q14964	2;2;2;2;1;1	2;2;2;2;1;1	2;2;2;2;1;1	Ras-related protein Rab-6B;Ras-related protein Rab-6A;Ras-related protein Rab-39A	RAB6B;RAB6A;RAB39A	tr|C9JU14|C9JU14_HUMAN Ras-related protein Rab-6B (Fragment) OS=Homo sapiens GN=RAB6B PE=1 SV=3;tr|J3KR73|J3KR73_HUMAN Ras-related protein Rab-6B (Fragment) OS=Homo sapiens GN=RAB6B PE=1 SV=1;sp|Q9NRW1|RAB6B_HUMAN Ras-related protein Rab-6B OS=Homo sapiens	6	2	2	2	1	0	2	1	1	1	1	1	1	1	0	2	1	1	1	1	1	1	1	0	2	1	1	1	1	1	1	27.7	27.7	27.7	9.6668	83	83;124;208;208;49;217	0	4.5945	By MS/MS		By MS/MS
C9JW96;P35232;C9JZ20;E7ESE2;E9PCW0;D6RBK0	C9JW96;P35232;C9JZ20;E7ESE2;E9PCW0	7;7;6;6;6;2	7;7;6;6;6;2	7;7;6;6;6;2	Prohibitin	PHB	tr|C9JW96|C9JW96_HUMAN Prohibitin (Fragment) OS=Homo sapiens GN=PHB PE=1 SV=2;sp|P35232|PHB_HUMAN Prohibitin OS=Homo sapiens GN=PHB PE=1 SV=1;tr|C9JZ20|C9JZ20_HUMAN Prohibitin (Fragment) OS=Homo sapiens GN=PHB PE=1 SV=1;tr|E7ESE2|E7ESE2_HUMAN Prohibitin (F	6	7	7	7	5	4	7	6	4	3	5	6	5	5	4	7	6	4	3	5	6	5	5	4	7	6	4	3	5	6	5	27.6	27.6	27.6	26.891	246	246;272;201;202;216;124	0	15.491	By MS/MS	By MS/MS	By MS/MS
H0YC95;C9JZR2;O60716	H0YC95;C9JZR2;O60716	2;2;2	2;2;2	2;2;2	Catenin delta-1	CTNND1	tr|H0YC95|H0YC95_HUMAN Catenin delta-1 (Fragment) OS=Homo sapiens GN=CTNND1 PE=1 SV=1;tr|C9JZR2|C9JZR2_HUMAN Catenin delta-1 OS=Homo sapiens GN=CTNND1 PE=1 SV=2;sp|O60716|CTND1_HUMAN Catenin delta-1 OS=Homo sapiens GN=CTNND1 PE=1 SV=1	3	2	2	2	1	0	1	1	1	1	1	1	1	1	0	1	1	1	1	1	1	1	1	0	1	1	1	1	1	1	1	18.7	18.7	18.7	13.93	123	123;938;968	0	3.6223	By matching		By MS/MS
C9K025;P18077;F8WBS5;F8WB72	C9K025;P18077;F8WBS5;F8WB72	5;5;4;4	5;5;4;4	5;5;4;4	60S ribosomal protein L35a	RPL35A	tr|C9K025|C9K025_HUMAN 60S ribosomal protein L35a (Fragment) OS=Homo sapiens GN=RPL35A PE=1 SV=1;sp|P18077|RL35A_HUMAN 60S ribosomal protein L35a OS=Homo sapiens GN=RPL35A PE=1 SV=2;tr|F8WBS5|F8WBS5_HUMAN 60S ribosomal protein L35a OS=Homo sapiens GN=RPL35	4	5	5	5	4	5	5	4	3	3	5	4	4	4	5	5	4	3	3	5	4	4	4	5	5	4	3	3	5	4	4	44.7	44.7	44.7	10.645	94	94;110;55;57	0	11.008	By MS/MS	By MS/MS	By MS/MS
C9K0I0;Q9UJT2	C9K0I0;Q9UJT2	1;1	1;1	1;1	Testis-specific serine kinase substrate	TSKS	tr|C9K0I0|C9K0I0_HUMAN Testis-specific serine kinase substrate OS=Homo sapiens GN=TSKS PE=1 SV=1;sp|Q9UJT2|TSKS_HUMAN Testis-specific serine kinase substrate OS=Homo sapiens GN=TSKS PE=1 SV=3	2	1	1	1	0	0	0	0	1	0	0	1	0	0	0	0	0	1	0	0	1	0	0	0	0	0	1	0	0	1	0	3.6	3.6	3.6	43.099	392	392;592	0	3.4772
F5H1T9;CON__Q9BYR9;F5H6S0;Q9BYT5;Q9BYU5;Q9BYR9;P0C7H8	F5H1T9;CON__Q9BYR9;F5H6S0;Q9BYT5;Q9BYU5;Q9BYR9;P0C7H8	1;1;1;1;1;1;1	1;1;1;1;1;1;1	1;1;1;1;1;1;1	Keratin-associated protein 2-2;Keratin-associated protein 2-1;Keratin-associated protein 2-4;Keratin-associated protein 2-3	KRTAP2-1;KRTAP2-2;KRTAP2-4;KRTAP2-3	tr|F5H1T9|F5H1T9_HUMAN Keratin-associated protein 2-1 OS=Homo sapiens GN=KRTAP2-1 PE=4 SV=1;;tr|F5H6S0|F5H6S0_HUMAN Keratin-associated protein 2-2 OS=Homo sapiens GN=KRTAP2-2 PE=4 SV=1;sp|Q9BYT5|KRA22_HUMAN Keratin-associated protein 2-2 OS=Homo sapiens GN	7	1	1	1	0	0	0	0	0	0	0	0	1	0	0	0	0	0	0	0	0	1	0	0	0	0	0	0	0	0	1	8.1	8.1	8.1	13.054	124	124;128;129;123;128;128;128	0	3.2124
D3YTB1;F8W727;P62910;D3YTI8	D3YTB1;F8W727;P62910	8;8;8;1	8;8;8;1	8;8;8;1	60S ribosomal protein L32	RPL32	tr|D3YTB1|D3YTB1_HUMAN 60S ribosomal protein L32 (Fragment) OS=Homo sapiens GN=RPL32 PE=1 SV=1;tr|F8W727|F8W727_HUMAN 60S ribosomal protein L32 OS=Homo sapiens GN=RPL32 PE=1 SV=1;sp|P62910|RL32_HUMAN 60S ribosomal protein L32 OS=Homo sapiens GN=RPL32 PE=1	4	8	8	8	8	8	8	8	8	8	7	8	8	8	8	8	8	8	8	7	8	8	8	8	8	8	8	8	7	8	8	55.6	55.6	55.6	15.616	133	133;153;135;62	0	32.313	By MS/MS	By MS/MS	By MS/MS
D4PHA4;Q86WP2	D4PHA4;Q86WP2	4;4	4;4	4;4	Vasculin	GPBP1	tr|D4PHA4|D4PHA4_HUMAN GC-rich promoter binding protein 1, isoform CRA_c OS=Homo sapiens GN=GPBP1 PE=1 SV=1;sp|Q86WP2|GPBP1_HUMAN Vasculin OS=Homo sapiens GN=GPBP1 PE=1 SV=1	2	4	4	4	3	3	3	3	4	4	1	3	4	3	3	3	3	4	4	1	3	4	3	3	3	3	4	4	1	3	4	14	14	14	55.525	493	493;473	0	12.613	By MS/MS	By MS/MS	By matching
D6R956;P09936;D6R974;D6RE83;D6RF53	D6R956;P09936;D6R974;D6RE83	9;9;8;7;3	9;9;8;7;3	9;9;8;7;3	Ubiquitin carboxyl-terminal hydrolase;Ubiquitin carboxyl-terminal hydrolase isozyme L1	UCHL1	tr|D6R956|D6R956_HUMAN Ubiquitin carboxyl-terminal hydrolase OS=Homo sapiens GN=UCHL1 PE=1 SV=1;sp|P09936|UCHL1_HUMAN Ubiquitin carboxyl-terminal hydrolase isozyme L1 OS=Homo sapiens GN=UCHL1 PE=1 SV=2;tr|D6R974|D6R974_HUMAN Ubiquitin carboxyl-terminal hyd	5	9	9	9	9	9	9	9	9	8	9	9	9	9	9	9	9	9	8	9	9	9	9	9	9	9	9	8	9	9	9	42.3	42.3	42.3	26.839	241	241;223;156;207;58	0	103.25	By MS/MS	By MS/MS	By MS/MS
D6RAA6;P57088	D6RAA6;P57088	1;1	1;1	1;1	Transmembrane protein 33	TMEM33	tr|D6RAA6|D6RAA6_HUMAN Transmembrane protein 33 (Fragment) OS=Homo sapiens GN=TMEM33 PE=1 SV=1;sp|P57088|TMM33_HUMAN Transmembrane protein 33 OS=Homo sapiens GN=TMEM33 PE=1 SV=2	2	1	1	1	0	0	1	1	0	0	0	0	0	0	0	1	1	0	0	0	0	0	0	0	1	1	0	0	0	0	0	5.4	5.4	5.4	25.223	222	222;247	0.0018298	3.0165			By MS/MS
D6RBW1;P06730;D6RFJ3;H0Y8J7	D6RBW1;P06730;D6RFJ3;H0Y8J7	2;2;1;1	2;2;1;1	2;2;1;1	Eukaryotic translation initiation factor 4E	EIF4E	tr|D6RBW1|D6RBW1_HUMAN Eukaryotic translation initiation factor 4E OS=Homo sapiens GN=EIF4E PE=1 SV=1;sp|P06730|IF4E_HUMAN Eukaryotic translation initiation factor 4E OS=Homo sapiens GN=EIF4E PE=1 SV=2;tr|D6RFJ3|D6RFJ3_HUMAN Eukaryotic translation initiati	4	2	2	2	0	0	1	0	0	1	0	0	1	0	0	1	0	0	1	0	0	1	0	0	1	0	0	1	0	0	1	10.6	10.6	10.6	28.512	245	245;217;42;155	0	4.103			By MS/MS
E5RIF1;D6RG00;H0YBX6;I3L0A0;Q15819;Q13404	E5RIF1;D6RG00;H0YBX6;I3L0A0;Q15819;Q13404	1;1;1;1;1;1	1;1;1;1;1;1	1;1;1;1;1;1	Ubiquitin-conjugating enzyme E2 variant 2;Ubiquitin-conjugating enzyme E2 variant 1	UBE2V2;UBE2V1;TMEM189-UBE2V1	tr|E5RIF1|E5RIF1_HUMAN Ubiquitin-conjugating enzyme E2 variant 2 (Fragment) OS=Homo sapiens GN=UBE2V2 PE=4 SV=1;tr|D6RG00|D6RG00_HUMAN HCG2018358, isoform CRA_d OS=Homo sapiens GN=UBE2V1 PE=4 SV=2;tr|H0YBX6|H0YBX6_HUMAN Ubiquitin-conjugating enzyme E2 vari	6	1	1	1	1	1	1	1	1	1	1	1	1	1	1	1	1	1	1	1	1	1	1	1	1	1	1	1	1	1	1	19.2	19.2	19.2	5.7715	52	52;89;154;370;145;147	0	3.7428	By MS/MS	By MS/MS	By MS/MS
D6RIW8;Q9NW82	D6RIW8;Q9NW82	2;2	2;2	2;2	WD repeat-containing protein 70	WDR70	tr|D6RIW8|D6RIW8_HUMAN WD repeat-containing protein 70 OS=Homo sapiens GN=WDR70 PE=1 SV=1;sp|Q9NW82|WDR70_HUMAN WD repeat-containing protein 70 OS=Homo sapiens GN=WDR70 PE=1 SV=1	2	2	2	2	1	2	1	0	1	1	0	2	1	1	2	1	0	1	1	0	2	1	1	2	1	0	1	1	0	2	1	6.5	6.5	6.5	43.24	387	387;654	0	4.6315	By MS/MS	By MS/MS	By MS/MS
E2QRG8;Q00765	E2QRG8;Q00765	1;1	1;1	1;1	Receptor expression-enhancing protein;Receptor expression-enhancing protein 5	REEP5	tr|E2QRG8|E2QRG8_HUMAN Receptor expression-enhancing protein (Fragment) OS=Homo sapiens GN=REEP5 PE=1 SV=1;sp|Q00765|REEP5_HUMAN Receptor expression-enhancing protein 5 OS=Homo sapiens GN=REEP5 PE=1 SV=3	2	1	1	1	1	1	1	1	1	1	1	1	1	1	1	1	1	1	1	1	1	1	1	1	1	1	1	1	1	1	1	6.1	6.1	6.1	18.121	165	165;189	0	3.725	By matching	By MS/MS	By MS/MS
E5RG17;Q6P1N9;A0A0D9SGD3;G5EA19;U3KQS5;E5RGF2;H0YBX2;E5RID7;E5RG62;E5RK70;E5RI69;E5RJY6	E5RG17;Q6P1N9;A0A0D9SGD3;G5EA19;U3KQS5;E5RGF2;H0YBX2	9;9;7;6;6;6;5;2;2;2;1;1	9;9;7;6;6;6;5;2;2;2;1;1	9;9;7;6;6;6;5;2;2;2;1;1	Putative deoxyribonuclease TATDN1	TATDN1	tr|E5RG17|E5RG17_HUMAN Putative deoxyribonuclease TATDN1 (Fragment) OS=Homo sapiens GN=TATDN1 PE=1 SV=1;sp|Q6P1N9|TATD1_HUMAN Putative deoxyribonuclease TATDN1 OS=Homo sapiens GN=TATDN1 PE=1 SV=2;tr|A0A0D9SGD3|A0A0D9SGD3_HUMAN Putative deoxyribonuclease TA	12	9	9	9	7	8	6	8	7	8	8	8	8	7	8	6	8	7	8	8	8	8	7	8	6	8	7	8	8	8	8	33.9	33.9	33.9	36.418	322	322;297;243;207;210;210;202;62;93;110;56;75	0	35.093	By MS/MS	By MS/MS	By MS/MS
E5RGQ3;Q9H446;E5RGS5	E5RGQ3;Q9H446;E5RGS5	2;2;1	2;2;1	2;2;1	RWD domain-containing protein 1	RWDD1	tr|E5RGQ3|E5RGQ3_HUMAN RWD domain-containing protein 1 (Fragment) OS=Homo sapiens GN=RWDD1 PE=1 SV=1;sp|Q9H446|RWDD1_HUMAN RWD domain-containing protein 1 OS=Homo sapiens GN=RWDD1 PE=1 SV=1;tr|E5RGS5|E5RGS5_HUMAN RWD domain-containing protein 1 (Fragment)	3	2	2	2	1	2	1	2	1	2	2	2	1	1	2	1	2	1	2	2	2	1	1	2	1	2	1	2	2	2	1	36.1	36.1	36.1	8.5618	72	72;243;67	0	6.0639	By matching	By MS/MS	By MS/MS
E5RGX5;Q93045	E5RGX5;Q93045	3;3	1;1	1;1	Stathmin;Stathmin-2	STMN2	tr|E5RGX5|E5RGX5_HUMAN Stathmin OS=Homo sapiens GN=STMN2 PE=1 SV=1;sp|Q93045|STMN2_HUMAN Stathmin-2 OS=Homo sapiens GN=STMN2 PE=1 SV=3	2	3	1	1	2	3	3	3	3	3	2	3	3	1	1	1	1	1	1	1	1	1	1	1	1	1	1	1	1	1	1	15.5	6	6	19.574	168	168;179	0	3.3796	By MS/MS	By MS/MS	By MS/MS
E5RI99;P62888;A0A0B4J213;E5RJH3;A0A0C4DH44	E5RI99;P62888	5;5;2;2;2	5;5;2;2;2	5;5;2;2;2	60S ribosomal protein L30	RPL30	tr|E5RI99|E5RI99_HUMAN 60S ribosomal protein L30 (Fragment) OS=Homo sapiens GN=RPL30 PE=1 SV=1;sp|P62888|RL30_HUMAN 60S ribosomal protein L30 OS=Homo sapiens GN=RPL30 PE=1 SV=2	5	5	5	5	5	5	5	5	5	4	5	4	5	5	5	5	5	5	4	5	4	5	5	5	5	5	5	4	5	4	5	58.8	58.8	58.8	12.656	114	114;115;51;56;96	0	32.608	By MS/MS	By MS/MS	By MS/MS
E5RIW3;E5RJD8;O75347;E5RHG6;E5RIX8	E5RIW3;E5RJD8;O75347;E5RHG6	12;12;12;9;4	12;12;12;9;4	12;12;12;9;4	Tubulin-specific chaperone A	TBCA	tr|E5RIW3|E5RIW3_HUMAN Tubulin-specific chaperone A OS=Homo sapiens GN=TBCA PE=1 SV=1;tr|E5RJD8|E5RJD8_HUMAN Tubulin-specific chaperone A OS=Homo sapiens GN=TBCA PE=1 SV=1;sp|O75347|TBCA_HUMAN Tubulin-specific chaperone A OS=Homo sapiens GN=TBCA PE=1 SV=3;	5	12	12	12	12	11	11	11	12	11	11	12	12	12	11	11	11	12	11	11	12	12	12	11	11	11	12	11	11	12	12	76.2	76.2	76.2	10.08	84	84;119;108;131;79	0	88.594	By MS/MS	By MS/MS	By MS/MS
E5RJR5;P63208	E5RJR5;P63208	1;1	1;1	1;1	S-phase kinase-associated protein 1	SKP1	tr|E5RJR5|E5RJR5_HUMAN S-phase kinase-associated protein 1 OS=Homo sapiens GN=SKP1 PE=1 SV=1;sp|P63208|SKP1_HUMAN S-phase kinase-associated protein 1 OS=Homo sapiens GN=SKP1 PE=1 SV=2	2	1	1	1	1	1	1	1	1	1	1	1	1	1	1	1	1	1	1	1	1	1	1	1	1	1	1	1	1	1	1	7.4	7.4	7.4	18.72	163	163;163	0	4.2556	By MS/MS	By MS/MS	By MS/MS
E7EX83;E7ENQ1;H7C360;E7EN19;E7ESS2;O95819;C9J840;A0A0D9SG62;H7C0P6;G3XAA2;G5E948;A0A0D9SEY1;H7C3Z6;C9J338;I3L2I2;Q8N4C8	E7EX83;E7ENQ1;H7C360;E7EN19;E7ESS2;O95819;C9J840;A0A0D9SG62;H7C0P6;G3XAA2;G5E948;A0A0D9SEY1	5;5;5;5;5;5;4;4;4;4;4;4;1;1;1;1	4;4;4;4;4;4;3;3;4;3;3;3;1;0;0;0	4;4;4;4;4;4;3;3;4;3;3;3;1;0;0;0	Mitogen-activated protein kinase kinase kinase kinase 4	MAP4K4	tr|E7EX83|E7EX83_HUMAN Mitogen-activated protein kinase kinase kinase kinase 4 OS=Homo sapiens GN=MAP4K4 PE=1 SV=1;tr|E7ENQ1|E7ENQ1_HUMAN Mitogen-activated protein kinase kinase kinase kinase 4 OS=Homo sapiens GN=MAP4K4 PE=1 SV=1;tr|H7C360|H7C360_HUMAN Mit	16	5	4	4	3	3	4	3	4	4	4	4	5	2	2	3	2	3	3	3	3	4	2	2	3	2	3	3	3	3	4	6.4	5.1	5.1	119	1038	1038;1154;1170;1272;1273;1239;987;1044;1056;1165;1235;1320;258;350;381;1332	0	8.5164	By MS/MS	By MS/MS	By MS/MS
E7END7;P62820;Q92928;A0A087WTI1;H0YLJ8;H0YL94;H0YMN7;H0YNE9;Q92930;P61006;P59190	E7END7;P62820;Q92928	5;5;3;2;1;1;1;1;1;1;1	5;5;3;2;1;1;1;1;1;1;1	1;1;0;0;0;0;0;0;0;0;0	Ras-related protein Rab-1A;Putative Ras-related protein Rab-1C	RAB1A;RAB1C	tr|E7END7|E7END7_HUMAN Ras-related protein Rab-1A OS=Homo sapiens GN=RAB1A PE=1 SV=1;sp|P62820|RAB1A_HUMAN Ras-related protein Rab-1A OS=Homo sapiens GN=RAB1A PE=1 SV=3;sp|Q92928|RAB1C_HUMAN Putative Ras-related protein Rab-1C OS=Homo sapiens GN=RAB1C PE=5	11	5	5	1	4	4	5	5	4	5	5	5	5	4	4	5	5	4	5	5	5	5	1	1	1	1	1	1	1	1	1	31.8	31.8	6.9	19.018	173	173;205;201;162;47;48;92;188;207;207;212	0	13.176	By MS/MS	By MS/MS	By MS/MS
E7ENZ3;P48643;B7ZAR1;E9PCA1;D6RIZ7;H0Y914	E7ENZ3;P48643;B7ZAR1;E9PCA1	10;10;9;9;1;1	10;10;9;9;1;1	10;10;9;9;1;1	T-complex protein 1 subunit epsilon	CCT5	tr|E7ENZ3|E7ENZ3_HUMAN T-complex protein 1 subunit epsilon OS=Homo sapiens GN=CCT5 PE=1 SV=1;sp|P48643|TCPE_HUMAN T-complex protein 1 subunit epsilon OS=Homo sapiens GN=CCT5 PE=1 SV=1;tr|B7ZAR1|B7ZAR1_HUMAN T-complex protein 1 subunit epsilon OS=Homo sapie	6	10	10	10	6	7	6	8	6	6	6	9	6	6	7	6	8	6	6	6	9	6	6	7	6	8	6	6	6	9	6	24.9	24.9	24.9	53.848	486	486;541;503;520;44;62	0	31.152	By MS/MS	By MS/MS	By MS/MS
E7EPB3;P50914	E7EPB3;P50914	4;4	4;4	4;4	60S ribosomal protein L14	RPL14	tr|E7EPB3|E7EPB3_HUMAN 60S ribosomal protein L14 OS=Homo sapiens GN=RPL14 PE=1 SV=1;sp|P50914|RL14_HUMAN 60S ribosomal protein L14 OS=Homo sapiens GN=RPL14 PE=1 SV=4	2	4	4	4	4	3	4	4	4	4	4	4	4	4	3	4	4	4	4	4	4	4	4	3	4	4	4	4	4	4	4	36.3	36.3	36.3	14.558	124	124;215	0	18.896	By MS/MS	By MS/MS	By MS/MS
G3V1Q4;E7ES33;E7EPK1;Q16181;A0A0U1RRE1;A0A0U1RRH9;Q6ZU15	G3V1Q4;E7ES33;E7EPK1;Q16181;A0A0U1RRE1	5;5;5;5;3;2;1	5;5;5;5;3;2;1	5;5;5;5;3;2;1	Septin-7	2019-09-07	tr|G3V1Q4|G3V1Q4_HUMAN Septin-7 OS=Homo sapiens GN=SEPT7 PE=1 SV=2;tr|E7ES33|E7ES33_HUMAN Septin-7 OS=Homo sapiens GN=SEPT7 PE=1 SV=3;tr|E7EPK1|E7EPK1_HUMAN Septin-7 OS=Homo sapiens GN=SEPT7 PE=1 SV=2;sp|Q16181|SEPT7_HUMAN Septin-7 OS=Homo sapiens GN=SEPT7	7	5	5	5	3	4	4	4	4	5	4	4	4	3	4	4	4	4	5	4	4	4	3	4	4	4	4	5	4	4	4	14.5	14.5	14.5	46.566	401	401;417;437;437;157;147;432	0	13.555	By MS/MS	By MS/MS	By MS/MS
E7EPN9;Q9Y520;A0A0A0MS30	E7EPN9;Q9Y520	5;5;1	5;5;1	5;5;1	Protein PRRC2C	PRRC2C	tr|E7EPN9|E7EPN9_HUMAN Protein PRRC2C OS=Homo sapiens GN=PRRC2C PE=1 SV=1;sp|Q9Y520|PRC2C_HUMAN Protein PRRC2C OS=Homo sapiens GN=PRRC2C PE=1 SV=4	3	5	5	5	2	2	3	0	1	1	1	3	1	2	2	3	0	1	1	1	3	1	2	2	3	0	1	1	1	3	1	2.3	2.3	2.3	308.77	2819	2819;2896;299	0	10.535	By MS/MS	By MS/MS	By MS/MS
E7EQR4;P15311;V9GZ54;E9PQ82;E9PNV3	E7EQR4;P15311	14;14;2;2;2	14;14;2;2;2	9;9;0;0;0	Ezrin	EZR	tr|E7EQR4|E7EQR4_HUMAN Ezrin OS=Homo sapiens GN=EZR PE=1 SV=3;sp|P15311|EZRI_HUMAN Ezrin OS=Homo sapiens GN=EZR PE=1 SV=4	5	14	14	9	12	9	11	13	11	13	14	13	11	12	9	11	13	11	13	14	13	11	8	4	7	8	6	8	9	8	7	23.7	23.7	15.9	69.371	586	586;586;103;116;148	0	55.72	By MS/MS	By MS/MS	By MS/MS
E9PES6;E7ES08;E7EQU1;O15347	E9PES6;E7ES08;E7EQU1;O15347	3;3;3;3	3;3;3;3	3;3;3;3	High mobility group protein B3	HMGB3	tr|E9PES6|E9PES6_HUMAN High mobility group protein B3 (Fragment) OS=Homo sapiens GN=HMGB3 PE=1 SV=1;tr|E7ES08|E7ES08_HUMAN High mobility group protein B3 (Fragment) OS=Homo sapiens GN=HMGB3 PE=1 SV=1;tr|E7EQU1|E7EQU1_HUMAN High mobility group protein B3 (F	4	3	3	3	3	2	3	3	3	2	1	2	2	3	2	3	3	3	2	1	2	2	3	2	3	3	3	2	1	2	2	17.6	17.6	17.6	17.522	153	153;188;193;200	0	12.168	By MS/MS	By MS/MS	By MS/MS
E7ERS3;Q86VM9;H3BP01;H3BPD0;H3BRN6;H3BRH3	E7ERS3;Q86VM9	26;26;7;6;2;2	26;26;7;6;2;2	26;26;7;6;2;2	Zinc finger CCCH domain-containing protein 18	ZC3H18	tr|E7ERS3|E7ERS3_HUMAN Zinc finger CCCH domain-containing protein 18 OS=Homo sapiens GN=ZC3H18 PE=1 SV=1;sp|Q86VM9|ZCH18_HUMAN Zinc finger CCCH domain-containing protein 18 OS=Homo sapiens GN=ZC3H18 PE=1 SV=2	6	26	26	26	24	25	25	25	26	25	17	24	22	24	25	25	25	26	25	17	24	22	24	25	25	25	26	25	17	24	22	37.3	37.3	37.3	108.94	977	977;953;238;197;75;196	0	129.72	By MS/MS	By MS/MS	By MS/MS
E7ESY4;Q13330;H0Y4T7;H7C3F3;F8W9Y9	E7ESY4;Q13330;H0Y4T7	6;6;3;2;1	3;3;1;1;1	3;3;1;1;1	Metastasis-associated protein MTA1	MTA1	tr|E7ESY4|E7ESY4_HUMAN Metastasis-associated protein MTA1 OS=Homo sapiens GN=MTA1 PE=1 SV=1;sp|Q13330|MTA1_HUMAN Metastasis-associated protein MTA1 OS=Homo sapiens GN=MTA1 PE=1 SV=2;tr|H0Y4T7|H0Y4T7_HUMAN Metastasis-associated protein MTA1 (Fragment) OS=Ho	5	6	3	3	5	4	6	4	6	6	4	5	3	2	1	3	2	3	3	2	3	0	2	1	3	2	3	3	2	3	0	9.1	4.8	4.8	79.372	703	703;715;511;55;255	0	6.8939	By matching	By matching	By MS/MS
E7ETY2;H0YA99	E7ETY2	35;4	1;0	1;0		TCOF1	tr|E7ETY2|E7ETY2_HUMAN Treacle protein OS=Homo sapiens GN=TCOF1 PE=1 SV=1	2	35	1	1	32	32	30	31	34	32	32	31	31	1	1	1	1	1	1	1	1	1	1	1	1	1	1	1	1	1	1	25.2	0.8	0.8	152.3	1488	1488;188	0	5.0238	By MS/MS	By MS/MS	By MS/MS
Q75MG1;E7ETZ4;Q9Y6E2;E9PFE3;C9JF98;F8WDX8;E9PFD4;E7EMS9;B5MCE7;B5MCH7	Q75MG1;E7ETZ4;Q9Y6E2;E9PFE3;C9JF98;F8WDX8;E9PFD4;E7EMS9;B5MCE7;B5MCH7	2;2;2;1;1;1;1;1;1;1	2;2;2;1;1;1;1;1;1;1	2;2;2;1;1;1;1;1;1;1	Basic leucine zipper and W2 domain-containing protein 2	BZW2	tr|Q75MG1|Q75MG1_HUMAN Basic leucine zipper and W2 domain-containing protein 2 (Fragment) OS=Homo sapiens GN=BZW2 PE=1 SV=1;tr|E7ETZ4|E7ETZ4_HUMAN Basic leucine zipper and W2 domain-containing protein 2 (Fragment) OS=Homo sapiens GN=BZW2 PE=1 SV=1;sp|Q9Y6E	10	2	2	2	2	2	2	2	2	1	2	2	2	2	2	2	2	2	1	2	2	2	2	2	2	2	2	1	2	2	2	10.2	10.2	10.2	31.247	274	274;408;419;161;163;170;189;208;225;343	0	5.935	By matching	By MS/MS	By MS/MS
E7EUI8;P11413;E9PD92;E7EM57	E7EUI8;P11413;E9PD92;E7EM57	2;2;1;1	2;2;1;1	2;2;1;1	Glucose-6-phosphate 1-dehydrogenase	G6PD	tr|E7EUI8|E7EUI8_HUMAN Glucose-6-phosphate 1-dehydrogenase (Fragment) OS=Homo sapiens GN=G6PD PE=1 SV=7;sp|P11413|G6PD_HUMAN Glucose-6-phosphate 1-dehydrogenase OS=Homo sapiens GN=G6PD PE=1 SV=4;tr|E9PD92|E9PD92_HUMAN Glucose-6-phosphate 1-dehydrogenase (F	4	2	2	2	1	1	1	1	0	2	1	2	0	1	1	1	1	0	2	1	2	0	1	1	1	1	0	2	1	2	0	7.7	7.7	7.7	38.521	339	339;515;256;320	0	3.1915	By MS/MS	By matching	By matching
E7EX73;E9PGM1;E7EUU4;Q04637;A0A0A0MR52;H7C044;C9J6B6;C9J2Z7;C9K073;C9JF13;F8WCF2;C9JHW9;H7C0V6;A0A0A0MSA7;A0A0U1RQK7;O43432	E7EX73;E9PGM1;E7EUU4;Q04637;A0A0A0MR52;H7C044	10;10;10;10;7;5;3;3;3;3;1;1;1;1;1;1	10;10;10;10;7;5;3;3;3;3;1;1;1;1;1;1	10;10;10;10;7;5;3;3;3;3;1;1;1;1;1;1	Eukaryotic translation initiation factor 4 gamma 1	EIF4G1	tr|E7EX73|E7EX73_HUMAN Eukaryotic translation initiation factor 4 gamma 1 OS=Homo sapiens GN=EIF4G1 PE=1 SV=1;tr|E9PGM1|E9PGM1_HUMAN Eukaryotic translation initiation factor 4 gamma 1 OS=Homo sapiens GN=EIF4G1 PE=1 SV=1;tr|E7EUU4|E7EUU4_HUMAN Eukaryotic tr	16	10	10	10	8	7	8	10	7	8	6	8	7	8	7	8	10	7	8	6	8	7	8	7	8	10	7	8	6	8	7	8.1	8.1	8.1	158.64	1436	1436;1513;1560;1599;1395;226;757;834;869;903;50;160;180;1621;1774;1585	0	27.639	By MS/MS	By MS/MS	By MS/MS
E7EVA0;P27816;H0Y2V1;F8W9U4;H7C4C5;B5MEG9	E7EVA0;P27816	9;9;4;4;3;2	9;9;4;4;3;2	9;9;4;4;3;2	Microtubule-associated protein;Microtubule-associated protein 4	MAP4	tr|E7EVA0|E7EVA0_HUMAN Microtubule-associated protein OS=Homo sapiens GN=MAP4 PE=1 SV=1;sp|P27816|MAP4_HUMAN Microtubule-associated protein 4 OS=Homo sapiens GN=MAP4 PE=1 SV=3	6	9	9	9	8	6	9	7	6	8	7	7	7	8	6	9	7	6	8	7	7	7	8	6	9	7	6	8	7	7	7	5.1	5.1	5.1	245.44	2297	2297;1152;463;828;493;761	0	24.092	By MS/MS	By MS/MS	By MS/MS
E7EWC2;F5H7S7;Q13576;D6R939	E7EWC2;F5H7S7;Q13576;D6R939	2;2;2;1	2;2;2;1	2;2;2;1	Ras GTPase-activating-like protein IQGAP2	IQGAP2	tr|E7EWC2|E7EWC2_HUMAN Ras GTPase-activating-like protein IQGAP2 (Fragment) OS=Homo sapiens GN=IQGAP2 PE=1 SV=1;tr|F5H7S7|F5H7S7_HUMAN Ras GTPase-activating-like protein IQGAP2 OS=Homo sapiens GN=IQGAP2 PE=1 SV=2;sp|Q13576|IQGA2_HUMAN Ras GTPase-activating	4	2	2	2	0	0	0	0	0	0	1	1	0	0	0	0	0	0	0	1	1	0	0	0	0	0	0	0	1	1	0	1.5	1.5	1.5	160.33	1402	1402;1525;1575;825	0.0035211	2.6513
E7EX17;P23588;F8W0K0;F8VSC7;F8VP89;F8VRU1;F8VYE9;F8VX11	E7EX17;P23588;F8W0K0;F8VSC7;F8VP89	4;4;2;2;2;1;1;1	4;4;2;2;2;1;1;1	4;4;2;2;2;1;1;1	Eukaryotic translation initiation factor 4B	EIF4B	tr|E7EX17|E7EX17_HUMAN Eukaryotic translation initiation factor 4B OS=Homo sapiens GN=EIF4B PE=1 SV=1;sp|P23588|IF4B_HUMAN Eukaryotic translation initiation factor 4B OS=Homo sapiens GN=EIF4B PE=1 SV=2;tr|F8W0K0|F8W0K0_HUMAN Eukaryotic translation initiati	8	4	4	4	2	3	3	3	3	2	2	2	4	2	3	3	3	3	2	2	2	4	2	3	3	3	3	2	2	2	4	8	8	8	69.697	616	616;611;170;227;275;175;185;360	0	11.787	By MS/MS	By MS/MS	By MS/MS
Q6AWB1;E7EX90;Q14203	Q6AWB1;E7EX90;Q14203	2;2;2	2;2;2	2;2;2	Dynactin subunit 1	DKFZp686E0752;DCTN1	tr|Q6AWB1|Q6AWB1_HUMAN Dynactin subunit 1 OS=Homo sapiens GN=DKFZp686E0752 PE=1 SV=1;tr|E7EX90|E7EX90_HUMAN Dynactin subunit 1 OS=Homo sapiens GN=DCTN1 PE=1 SV=1;sp|Q14203|DCTN1_HUMAN Dynactin subunit 1 OS=Homo sapiens GN=DCTN1 PE=1 SV=3	3	2	2	2	2	1	2	1	1	1	0	2	2	2	1	2	1	1	1	0	2	2	2	1	2	1	1	1	0	2	2	2.5	2.5	2.5	98.517	890	890;1256;1278	0	4.0814	By MS/MS	By MS/MS	By MS/MS
F8VZJ2;F8W0W4;H0YHX9;Q13765;E9PAV3;F8W1N5;F8VNW4	F8VZJ2;F8W0W4;H0YHX9;Q13765;E9PAV3;F8W1N5;F8VNW4	3;3;3;3;3;2;2	3;3;3;3;3;2;2	3;3;3;3;3;2;2	Nascent polypeptide-associated complex subunit alpha;Nascent polypeptide-associated complex subunit alpha, muscle-specific form	NACA	tr|F8VZJ2|F8VZJ2_HUMAN Nascent polypeptide-associated complex subunit alpha OS=Homo sapiens GN=NACA PE=1 SV=1;tr|F8W0W4|F8W0W4_HUMAN Nascent polypeptide-associated complex subunit alpha (Fragment) OS=Homo sapiens GN=NACA PE=1 SV=1;tr|H0YHX9|H0YHX9_HUMAN Na	7	3	3	3	3	2	3	2	3	3	2	2	3	3	2	3	2	3	3	2	2	3	3	2	3	2	3	3	2	2	3	30.9	30.9	30.9	15.016	136	136;198;213;215;2078;71;148	0	41.663	By MS/MS	By MS/MS	By MS/MS
E9PB61;Q86V81	E9PB61;Q86V81	4;4	4;4	4;4	THO complex subunit 4	ALYREF	tr|E9PB61|E9PB61_HUMAN THO complex subunit 4 OS=Homo sapiens GN=ALYREF PE=1 SV=1;sp|Q86V81|THOC4_HUMAN THO complex subunit 4 OS=Homo sapiens GN=ALYREF PE=1 SV=3	2	4	4	4	2	2	2	3	1	2	2	4	3	2	2	2	3	1	2	2	4	3	2	2	2	3	1	2	2	4	3	22.7	22.7	22.7	27.557	264	264;257	0	13.122	By MS/MS	By matching	By MS/MS
E9PBF6;P20700;A0A0D9SFE5;A0A0D9SFY5	E9PBF6;P20700;A0A0D9SFE5	9;9;8;4	9;9;8;4	9;9;8;4	Lamin-B1	LMNB1	tr|E9PBF6|E9PBF6_HUMAN Lamin-B1 OS=Homo sapiens GN=LMNB1 PE=1 SV=1;sp|P20700|LMNB1_HUMAN Lamin-B1 OS=Homo sapiens GN=LMNB1 PE=1 SV=2;tr|A0A0D9SFE5|A0A0D9SFE5_HUMAN Lamin B1, isoform CRA_a OS=Homo sapiens GN=LMNB1 PE=1 SV=1	4	9	9	9	4	6	7	5	3	5	5	8	5	4	6	7	5	3	5	5	8	5	4	6	7	5	3	5	5	8	5	25.8	25.8	25.8	44.643	387	387;586;329;166	0	24.826	By MS/MS	By MS/MS	By MS/MS
E9PBS1;P22234;D6RF62	E9PBS1;P22234;D6RF62	10;10;7	10;10;7	10;10;7	Multifunctional protein ADE2;Phosphoribosylaminoimidazole-succinocarboxamide synthase;Phosphoribosylaminoimidazole carboxylase	PAICS	tr|E9PBS1|E9PBS1_HUMAN Multifunctional protein ADE2 (Fragment) OS=Homo sapiens GN=PAICS PE=1 SV=1;sp|P22234|PUR6_HUMAN Multifunctional protein ADE2 OS=Homo sapiens GN=PAICS PE=1 SV=3;tr|D6RF62|D6RF62_HUMAN Multifunctional protein ADE2 OS=Homo sapiens GN=PA	3	10	10	10	9	8	10	9	7	10	9	10	9	9	8	10	9	7	10	9	10	9	9	8	10	9	7	10	9	10	9	26.2	26.2	26.2	45.651	413	413;425;333	0	38.426	By MS/MS	By MS/MS	By MS/MS
E9PC52;Q16576;Q5JP01;C9J7L0;Q5JNZ6	E9PC52;Q16576;Q5JP01	5;5;3;1;1	5;5;3;1;1	3;3;2;1;1	Histone-binding protein RBBP7	RBBP7	tr|E9PC52|E9PC52_HUMAN Histone-binding protein RBBP7 OS=Homo sapiens GN=RBBP7 PE=1 SV=1;sp|Q16576|RBBP7_HUMAN Histone-binding protein RBBP7 OS=Homo sapiens GN=RBBP7 PE=1 SV=1;tr|Q5JP01|Q5JP01_HUMAN Histone-binding protein RBBP7 (Fragment) OS=Homo sapiens G	5	5	5	3	3	4	5	5	5	5	5	5	5	3	4	5	5	5	5	5	5	5	1	2	3	3	3	3	3	3	3	18.5	18.5	14.9	46.938	416	416;425;285;68;85	0	20.473	By MS/MS	By MS/MS	By MS/MS
E9PCK9	E9PCK9	1	1	1		MLIP	tr|E9PCK9|E9PCK9_HUMAN Muscular LMNA-interacting protein (Fragment) OS=Homo sapiens GN=MLIP PE=1 SV=1	1	1	1	1	1	0	0	0	0	1	1	1	0	1	0	0	0	0	1	1	1	0	1	0	0	0	0	1	1	1	0	2	2	2	59.111	561	561	0.0086207	2.4916	By matching
E9PCY7;G8JLB6;P31943;E5RGV0;D6RIU0;D6RBM0;H0YB39;P55795;E7EQJ0;D6RAM1;D6R9T0;D6RFM3;D6RIT2;E7EN40;D6RDU3;D6RJ04;D6RIH9;H0YBG7;H0YBD7;D6R9D3;D6RF17;D6RDL0;E5RGH4;E5RJ94;H0YAQ2	E9PCY7;G8JLB6;P31943;E5RGV0;D6RIU0;D6RBM0;H0YB39;P55795	7;7;7;4;4;4;4;4;3;3;3;3;3;3;3;3;3;3;3;2;2;2;2;1;1	7;7;7;4;4;4;4;4;3;3;3;3;3;3;3;3;3;3;3;2;2;2;2;1;1	5;5;5;4;4;4;2;3;3;3;3;3;3;3;3;3;3;1;1;2;2;2;2;1;1	Heterogeneous nuclear ribonucleoprotein H;Heterogeneous nuclear ribonucleoprotein H, N-terminally processed;Heterogeneous nuclear ribonucleoprotein H2	HNRNPH1;HNRNPH2	tr|E9PCY7|E9PCY7_HUMAN Heterogeneous nuclear ribonucleoprotein H OS=Homo sapiens GN=HNRNPH1 PE=1 SV=1;tr|G8JLB6|G8JLB6_HUMAN Heterogeneous nuclear ribonucleoprotein H OS=Homo sapiens GN=HNRNPH1 PE=1 SV=1;sp|P31943|HNRH1_HUMAN Heterogeneous nuclear ribonucl	25	7	7	5	5	5	6	6	4	6	5	5	5	5	5	6	6	4	6	5	5	5	3	4	4	4	3	4	5	4	3	23.3	23.3	17	47.087	429	429;472;449;155;168;212;277;449;115;130;162;163;164;166;171;172;184;185;195;40;49;84;100;28;131	0	34.808	By MS/MS	By MS/MS	By MS/MS
E9PEB5;Q96AE4;C9JSZ1	E9PEB5;Q96AE4;C9JSZ1	2;2;1	2;2;1	2;2;1	Far upstream element-binding protein 1	FUBP1	tr|E9PEB5|E9PEB5_HUMAN Far upstream element-binding protein 1 OS=Homo sapiens GN=FUBP1 PE=1 SV=1;sp|Q96AE4|FUBP1_HUMAN Far upstream element-binding protein 1 OS=Homo sapiens GN=FUBP1 PE=1 SV=3;tr|C9JSZ1|C9JSZ1_HUMAN Far upstream element-binding protein 1 (	3	2	2	2	0	0	1	1	0	1	0	2	1	0	0	1	1	0	1	0	2	1	0	0	1	1	0	1	0	2	1	4.3	4.3	4.3	68.903	655	655;644;232	0.0018315	3.0172			By MS/MS
E9PEX6;P09622	E9PEX6;P09622	3;3	3;3	3;3	Dihydrolipoyl dehydrogenase;Dihydrolipoyl dehydrogenase, mitochondrial	DLD	tr|E9PEX6|E9PEX6_HUMAN Dihydrolipoyl dehydrogenase OS=Homo sapiens GN=DLD PE=1 SV=1;sp|P09622|DLDH_HUMAN Dihydrolipoyl dehydrogenase, mitochondrial OS=Homo sapiens GN=DLD PE=1 SV=2	2	3	3	3	1	1	2	2	1	0	0	2	0	1	1	2	2	1	0	0	2	0	1	1	2	2	1	0	0	2	0	7.8	7.8	7.8	51.815	486	486;509	0	8.3757	By matching	By matching	By MS/MS
H0Y8C4;E9PFR3;Q14738	H0Y8C4;E9PFR3;Q14738	1;1;1	1;1;1	1;1;1	Serine/threonine-protein phosphatase 2A 56 kDa regulatory subunit delta isoform	PPP2R5D	tr|H0Y8C4|H0Y8C4_HUMAN Serine/threonine-protein phosphatase 2A 56 kDa regulatory subunit delta isoform (Fragment) OS=Homo sapiens GN=PPP2R5D PE=1 SV=1;tr|E9PFR3|E9PFR3_HUMAN Serine/threonine-protein phosphatase 2A 56 kDa regulatory subunit delta isoform OS	3	1	1	1	1	1	1	1	1	1	1	1	1	1	1	1	1	1	1	1	1	1	1	1	1	1	1	1	1	1	1	2.2	2.2	2.2	59.335	504	504;594;602	0	3.3525	By MS/MS	By MS/MS	By MS/MS
E9PGM4;Q04446	E9PGM4;Q04446	2;2	2;2	2;2	1,4-alpha-glucan-branching enzyme	GBE1	tr|E9PGM4|E9PGM4_HUMAN 1,4-alpha-glucan-branching enzyme OS=Homo sapiens GN=GBE1 PE=1 SV=1;sp|Q04446|GLGB_HUMAN 1,4-alpha-glucan-branching enzyme OS=Homo sapiens GN=GBE1 PE=1 SV=3	2	2	2	2	2	1	2	1	1	1	1	1	0	2	1	2	1	1	1	1	1	0	2	1	2	1	1	1	1	1	0	4.4	4.4	4.4	75.959	661	661;702	0	3.7811	By MS/MS	By matching	By matching
H7C1D4;E9PGT1;Q15631	H7C1D4;E9PGT1;Q15631	1;1;1	1;1;1	1;1;1	Translin	TSN	tr|H7C1D4|H7C1D4_HUMAN Translin (Fragment) OS=Homo sapiens GN=TSN PE=1 SV=1;tr|E9PGT1|E9PGT1_HUMAN Translin OS=Homo sapiens GN=TSN PE=1 SV=1;sp|Q15631|TSN_HUMAN Translin OS=Homo sapiens GN=TSN PE=1 SV=1	3	1	1	1	0	0	0	0	1	0	0	0	0	0	0	0	0	1	0	0	0	0	0	0	0	0	1	0	0	0	0	10.8	10.8	10.8	21.01	185	185;223;228	0.0035524	2.7073
E9PHI6;Q9Y6G9	E9PHI6;Q9Y6G9	3;3	3;3	3;3	Cytoplasmic dynein 1 light intermediate chain 1	DYNC1LI1	tr|E9PHI6|E9PHI6_HUMAN Cytoplasmic dynein 1 light intermediate chain 1 OS=Homo sapiens GN=DYNC1LI1 PE=1 SV=1;sp|Q9Y6G9|DC1L1_HUMAN Cytoplasmic dynein 1 light intermediate chain 1 OS=Homo sapiens GN=DYNC1LI1 PE=1 SV=3	2	3	3	3	2	2	2	2	2	2	3	2	1	2	2	2	2	2	2	3	2	1	2	2	2	2	2	2	3	2	1	11.3	11.3	11.3	43.193	407	407;523	0	5.9031	By MS/MS	By MS/MS	By MS/MS
E9PHY5;E9PK52;I6L9B1;E9PII3;E9PQD2;E9PQN0;E9PRG1;E9PIG0;Q6R5J7;E9PJP4;B2RB02;E9PMG5;J3KT37;J3QS55;Q4VXN0;A0A0D9SG07;A0A0C4DH22;Q9H4G0	E9PHY5;E9PK52;I6L9B1;E9PII3	17;16;13;13;5;4;4;4;4;3;3;2;1;1;1;1;1;1	1;1;1;0;0;0;0;0;0;0;0;1;0;0;0;0;0;0	0;0;0;0;0;0;0;0;0;0;0;0;0;0;0;0;0;0		EPB41L2	tr|E9PHY5|E9PHY5_HUMAN Band 4.1-like protein 2 OS=Homo sapiens GN=EPB41L2 PE=1 SV=1;tr|E9PK52|E9PK52_HUMAN Band 4.1-like protein 2 OS=Homo sapiens GN=EPB41L2 PE=1 SV=1;tr|I6L9B1|I6L9B1_HUMAN Band 4.1-like protein 2 OS=Homo sapiens GN=EPB41L2 PE=1 SV=1;tr|E	18	17	1	0	9	8	9	11	15	15	16	13	9	0	0	0	0	1	1	0	0	0	0	0	0	0	0	0	0	0	0	21.7	1.3	0	104.36	935	935;811;633;706;179;127;153;162;383;118;503;224;147;162;257;701;880;881	0.0018215	2.961	By matching	By matching	By matching
E9PK91;E9PK09;E9PQN2;E9PKI6;E9PJA7;H0YF63;H0YF00	E9PK91;E9PK09;E9PQN2;E9PKI6	43;36;36;36;15;7;5	2;0;0;0;0;2;0	2;0;0;0;0;2;0		BCLAF1	tr|E9PK91|E9PK91_HUMAN Bcl-2-associated transcription factor 1 OS=Homo sapiens GN=BCLAF1 PE=1 SV=1;tr|E9PK09|E9PK09_HUMAN Bcl-2-associated transcription factor 1 (Fragment) OS=Homo sapiens GN=BCLAF1 PE=1 SV=7;tr|E9PQN2|E9PQN2_HUMAN Bcl-2-associated transcr	7	43	2	2	43	43	43	42	42	43	40	41	42	2	2	2	2	2	2	2	2	2	2	2	2	2	2	2	2	2	2	44.7	1.8	1.8	100.4	871	871;726;750;752;467;126;118	0	13.685	By MS/MS	By MS/MS	By MS/MS
E9PKP7;E9PMM2;H0YDH7	E9PKP7	43;10;3	1;0;0	1;0;0		UBTF	tr|E9PKP7|E9PKP7_HUMAN Nucleolar transcription factor 1 OS=Homo sapiens GN=UBTF PE=1 SV=1	3	43	1	1	42	43	41	42	43	42	41	42	41	1	1	1	1	1	1	1	1	1	1	1	1	1	1	1	1	1	1	52.6	1.1	1.1	87.435	745	745;149;36	1	-2	By MS/MS	By MS/MS	By MS/MS
E9PNH1;F5H6X6;E9PKU7;Q14697	E9PNH1;F5H6X6;E9PKU7;Q14697	1;1;1;1	1;1;1;1	1;1;1;1	Neutral alpha-glucosidase AB	GANAB	tr|E9PNH1|E9PNH1_HUMAN Neutral alpha-glucosidase AB (Fragment) OS=Homo sapiens GN=GANAB PE=1 SV=1;tr|F5H6X6|F5H6X6_HUMAN Neutral alpha-glucosidase AB OS=Homo sapiens GN=GANAB PE=1 SV=1;tr|E9PKU7|E9PKU7_HUMAN Neutral alpha-glucosidase AB OS=Homo sapiens GN=	4	1	1	1	1	1	1	1	1	1	1	1	1	1	1	1	1	1	1	1	1	1	1	1	1	1	1	1	1	1	1	12.6	12.6	12.6	13.163	119	119;847;852;944	0	4.5345	By MS/MS	By MS/MS	By MS/MS
E9PL69;P23921	E9PL69;P23921	2;2	2;2	2;2	Ribonucleoside-diphosphate reductase large subunit	RRM1	tr|E9PL69|E9PL69_HUMAN Ribonucleoside-diphosphate reductase large subunit OS=Homo sapiens GN=RRM1 PE=1 SV=1;sp|P23921|RIR1_HUMAN Ribonucleoside-diphosphate reductase large subunit OS=Homo sapiens GN=RRM1 PE=1 SV=1	2	2	2	2	0	0	1	0	0	0	0	1	0	0	0	1	0	0	0	0	1	0	0	0	1	0	0	0	0	1	0	4.4	4.4	4.4	64.836	570	570;792	0.00271	2.8759			By MS/MS
E9PQD0;E9PS30;E9PLI6;E9PS76;Q8N9N8	E9PQD0;E9PS30;E9PLI6;E9PS76;Q8N9N8	1;1;1;1;1	1;1;1;1;1	1;1;1;1;1	Probable RNA-binding protein EIF1AD	EIF1AD	tr|E9PQD0|E9PQD0_HUMAN Probable RNA-binding protein EIF1AD OS=Homo sapiens GN=EIF1AD PE=1 SV=1;tr|E9PS30|E9PS30_HUMAN Probable RNA-binding protein EIF1AD (Fragment) OS=Homo sapiens GN=EIF1AD PE=1 SV=1;tr|E9PLI6|E9PLI6_HUMAN Probable RNA-binding protein EIF	5	1	1	1	0	0	1	1	1	0	0	1	1	0	0	1	1	1	0	0	1	1	0	0	1	1	1	0	0	1	1	25	25	25	7.3314	64	64;78;113;114;165	0.0034965	2.6151			By matching
E9PLL6;P46776;E9PJD9;E9PLX7	E9PLL6;P46776;E9PJD9	6;6;5;2	6;6;5;2	6;6;5;2	60S ribosomal protein L27a	RPL27A	tr|E9PLL6|E9PLL6_HUMAN 60S ribosomal protein L27a OS=Homo sapiens GN=RPL27A PE=1 SV=1;sp|P46776|RL27A_HUMAN 60S ribosomal protein L27a OS=Homo sapiens GN=RPL27A PE=1 SV=2;tr|E9PJD9|E9PJD9_HUMAN 60S ribosomal protein L27a OS=Homo sapiens GN=RPL27A PE=1 SV=1	4	6	6	6	5	5	6	6	6	5	5	6	5	5	5	6	6	6	5	5	6	5	5	5	6	6	6	5	5	6	5	40.7	40.7	40.7	12.201	108	108;148;91;113	0	20.021	By MS/MS	By MS/MS	By MS/MS
E9PLT0;O75534;E9PNG3;E9PJK7	E9PLT0;O75534	10;10;2;1	10;10;2;1	10;10;2;1	Cold shock domain-containing protein E1	CSDE1	tr|E9PLT0|E9PLT0_HUMAN Cold shock domain-containing protein E1 OS=Homo sapiens GN=CSDE1 PE=1 SV=1;sp|O75534|CSDE1_HUMAN Cold shock domain-containing protein E1 OS=Homo sapiens GN=CSDE1 PE=1 SV=2	4	10	10	10	7	5	8	6	6	6	8	8	3	7	5	8	6	6	6	8	8	3	7	5	8	6	6	6	8	8	3	18.6	18.6	18.6	74.583	668	668;798;137;36	0	29.19	By MS/MS	By MS/MS	By MS/MS
E9PLT2	E9PLT2	12	2	2		UBTF	tr|E9PLT2|E9PLT2_HUMAN Nucleolar transcription factor 1 (Fragment) OS=Homo sapiens GN=UBTF PE=1 SV=1	1	12	2	2	12	12	12	12	12	12	12	12	12	2	2	2	2	2	2	2	2	2	2	2	2	2	2	2	2	2	2	57.2	4.1	4.1	23.029	194	194	0	5.8773	By MS/MS	By MS/MS	By MS/MS
E9PM69;R4GNH3;P17980;E9PKD5	E9PM69;R4GNH3;P17980;E9PKD5	2;2;2;1	2;2;2;1	2;2;2;1	26S protease regulatory subunit 6A	PSMC3	tr|E9PM69|E9PM69_HUMAN 26S protease regulatory subunit 6A OS=Homo sapiens GN=PSMC3 PE=1 SV=1;tr|R4GNH3|R4GNH3_HUMAN 26S protease regulatory subunit 6A OS=Homo sapiens GN=PSMC3 PE=1 SV=1;sp|P17980|PRS6A_HUMAN 26S protease regulatory subunit 6A OS=Homo sapie	4	2	2	2	1	0	1	0	0	0	0	2	1	1	0	1	0	0	0	0	2	1	1	0	1	0	0	0	0	2	1	6	6	6	44.323	397	397;423;439;311	0.0018198	2.9582	By matching		By matching
E9PRZ9;E9PM92;O00193	E9PRZ9;E9PM92;O00193	1;1;1	1;1;1	1;1;1	Small acidic protein	C11orf58;SMAP	tr|E9PRZ9|E9PRZ9_HUMAN Small acidic protein (Fragment) OS=Homo sapiens GN=C11orf58 PE=1 SV=1;tr|E9PM92|E9PM92_HUMAN Small acidic protein OS=Homo sapiens GN=C11orf58 PE=1 SV=2;sp|O00193|SMAP_HUMAN Small acidic protein OS=Homo sapiens GN=SMAP PE=1 SV=1	3	1	1	1	1	1	1	1	1	1	1	1	1	1	1	1	1	1	1	1	1	1	1	1	1	1	1	1	1	1	1	17.8	17.8	17.8	10.038	90	90;157;183	0	4.0041	By MS/MS	By MS/MS	By matching
E9PN17;O75964	E9PN17;O75964	1;1	1;1	1;1	ATP synthase subunit g, mitochondrial	ATP5L	tr|E9PN17|E9PN17_HUMAN ATP synthase subunit g, mitochondrial OS=Homo sapiens GN=ATP5L PE=1 SV=1;sp|O75964|ATP5L_HUMAN ATP synthase subunit g, mitochondrial OS=Homo sapiens GN=ATP5L PE=1 SV=3	2	1	1	1	1	0	1	1	1	0	1	1	0	1	0	1	1	1	0	1	1	0	1	0	1	1	1	0	1	1	0	14.5	14.5	14.5	8.4518	76	76;103	0.003543	2.6951	By MS/MS		By MS/MS
E9PPH5;Q9BTT0	E9PPH5;Q9BTT0	2;2	2;2	2;2	Acidic leucine-rich nuclear phosphoprotein 32 family member E	ANP32E	tr|E9PPH5|E9PPH5_HUMAN Acidic leucine-rich nuclear phosphoprotein 32 family member E (Fragment) OS=Homo sapiens GN=ANP32E PE=1 SV=1;sp|Q9BTT0|AN32E_HUMAN Acidic leucine-rich nuclear phosphoprotein 32 family member E OS=Homo sapiens GN=ANP32E PE=1 SV=1	2	2	2	2	1	0	2	2	2	2	0	1	1	1	0	2	2	2	2	0	1	1	1	0	2	2	2	2	0	1	1	24.6	24.6	24.6	13.128	114	114;268	0	6.0499	By matching		By matching
E9PQI5;E9PQ80;E9PSI1;Q9BY43	E9PQI5;E9PQ80;E9PSI1;Q9BY43	1;1;1;1	1;1;1;1	1;1;1;1	Charged multivesicular body protein 4a	CHMP4A	tr|E9PQI5|E9PQI5_HUMAN Charged multivesicular body protein 4a OS=Homo sapiens GN=CHMP4A PE=1 SV=1;tr|E9PQ80|E9PQ80_HUMAN Charged multivesicular body protein 4a (Fragment) OS=Homo sapiens GN=CHMP4A PE=1 SV=1;tr|E9PSI1|E9PSI1_HUMAN Transmembrane 9 superfamil	4	1	1	1	1	0	1	1	1	1	0	1	1	1	0	1	1	1	1	0	1	1	1	0	1	1	1	1	0	1	1	8.4	8.4	8.4	18.845	166	166;213;815;222	0	3.8478	By MS/MS		By MS/MS
E9PQK6;G3V1C3;Q9BZZ5	E9PQK6;G3V1C3;Q9BZZ5	1;1;1	1;1;1	1;1;1	Apoptosis inhibitor 5	API5	tr|E9PQK6|E9PQK6_HUMAN Apoptosis inhibitor 5 OS=Homo sapiens GN=API5 PE=1 SV=1;tr|G3V1C3|G3V1C3_HUMAN Apoptosis inhibitor 5 OS=Homo sapiens GN=API5 PE=1 SV=1;sp|Q9BZZ5|API5_HUMAN Apoptosis inhibitor 5 OS=Homo sapiens GN=API5 PE=1 SV=3	3	1	1	1	0	1	1	0	0	0	0	0	1	0	1	1	0	0	0	0	0	1	0	1	1	0	0	0	0	0	1	13	13	13	13.841	123	123;510;524	0.0043403	2.5768		By matching	By MS/MS
E9PQY2;Q9NQP4	E9PQY2;Q9NQP4	1;1	1;1	1;1	Prefoldin subunit 4	PFDN4	tr|E9PQY2|E9PQY2_HUMAN Prefoldin subunit 4 OS=Homo sapiens GN=PFDN4 PE=1 SV=1;sp|Q9NQP4|PFD4_HUMAN Prefoldin subunit 4 OS=Homo sapiens GN=PFDN4 PE=1 SV=1	2	1	1	1	1	1	0	1	1	1	1	1	1	1	1	0	1	1	1	1	1	1	1	1	0	1	1	1	1	1	1	11	11	11	15.598	136	136;134	0.0035714	2.7485	By matching	By MS/MS
E9PR30;P62861;E9PM49	E9PR30;P62861	3;3;1	3;3;1	3;3;1	40S ribosomal protein S30	FAU	tr|E9PR30|E9PR30_HUMAN 40S ribosomal protein S30 OS=Homo sapiens GN=FAU PE=1 SV=1;sp|P62861|RS30_HUMAN 40S ribosomal protein S30 OS=Homo sapiens GN=FAU PE=1 SV=1	3	3	3	3	3	3	3	3	3	3	3	3	3	3	3	3	3	3	3	3	3	3	3	3	3	3	3	3	3	3	3	18.4	18.4	18.4	10.905	98	98;59;109	0	9.2126	By MS/MS	By MS/MS	By MS/MS
F2Z2C0;Q9Y2L1;G3V1J5	F2Z2C0;Q9Y2L1;G3V1J5	4;4;2	4;4;2	4;4;2	Exosome complex exonuclease RRP44	DIS3	tr|F2Z2C0|F2Z2C0_HUMAN Exosome complex exonuclease RRP44 OS=Homo sapiens GN=DIS3 PE=1 SV=1;sp|Q9Y2L1|RRP44_HUMAN Exosome complex exonuclease RRP44 OS=Homo sapiens GN=DIS3 PE=1 SV=2;tr|G3V1J5|G3V1J5_HUMAN Exosome complex exonuclease RRP44 OS=Homo sapiens GN	3	4	4	4	1	1	3	3	1	2	2	3	2	1	1	3	3	1	2	2	3	2	1	1	3	3	1	2	2	3	2	9.5	9.5	9.5	63.616	559	559;958;796	0	9.5958	By MS/MS	By matching	By MS/MS
F2Z2K0;Q9UNZ2	F2Z2K0;Q9UNZ2	1;1	1;1	1;1	NSFL1 cofactor p47	NSFL1C	tr|F2Z2K0|F2Z2K0_HUMAN NSFL1 cofactor p47 OS=Homo sapiens GN=NSFL1C PE=1 SV=1;sp|Q9UNZ2|NSF1C_HUMAN NSFL1 cofactor p47 OS=Homo sapiens GN=NSFL1C PE=1 SV=2	2	1	1	1	1	1	1	0	1	1	1	1	1	1	1	1	0	1	1	1	1	1	1	1	1	0	1	1	1	1	1	5.8	5.8	5.8	30.22	274	274;370	0.0086133	2.4841	By MS/MS	By MS/MS	By MS/MS
F2Z393;P37837	F2Z393;P37837	3;3	3;3	3;3	Transaldolase	TALDO1	tr|F2Z393|F2Z393_HUMAN Transaldolase OS=Homo sapiens GN=TALDO1 PE=1 SV=1;sp|P37837|TALDO_HUMAN Transaldolase OS=Homo sapiens GN=TALDO1 PE=1 SV=2	2	3	3	3	3	2	3	3	2	1	0	3	2	3	2	3	3	2	1	0	3	2	3	2	3	3	2	1	0	3	2	10.7	10.7	10.7	35.328	318	318;337	0	7.0763	By MS/MS	By matching	By MS/MS
F5GY37;J3KPX7;Q99623;F5GWA7;F5H3X6;F5H2D2;F5H0C5	F5GY37;J3KPX7;Q99623;F5GWA7;F5H3X6	10;10;10;7;6;1;1	10;10;10;7;6;1;1	10;10;10;7;6;1;1	Prohibitin-2	PHB2	tr|F5GY37|F5GY37_HUMAN Prohibitin-2 OS=Homo sapiens GN=PHB2 PE=1 SV=1;tr|J3KPX7|J3KPX7_HUMAN Prohibitin-2 OS=Homo sapiens GN=PHB2 PE=1 SV=2;sp|Q99623|PHB2_HUMAN Prohibitin-2 OS=Homo sapiens GN=PHB2 PE=1 SV=2;tr|F5GWA7|F5GWA7_HUMAN Prohibitin-2 (Fragment) O	7	10	10	10	5	7	10	6	4	6	6	9	7	5	7	10	6	4	6	6	9	7	5	7	10	6	4	6	6	9	7	37.1	37.1	37.1	29.723	267	267;298;299;261;213;87;112	0	38.818	By MS/MS	By MS/MS	By MS/MS
F5H4W5;F5H4X2;F5H0P4;F5GY90;F5H226;F5H345;P08397	F5H4W5;F5H4X2;F5H0P4;F5GY90;F5H226;F5H345;P08397	1;1;1;1;1;1;1	1;1;1;1;1;1;1	1;1;1;1;1;1;1	Porphobilinogen deaminase	HMBS	tr|F5H4W5|F5H4W5_HUMAN Porphobilinogen deaminase OS=Homo sapiens GN=HMBS PE=1 SV=1;tr|F5H4X2|F5H4X2_HUMAN Porphobilinogen deaminase OS=Homo sapiens GN=HMBS PE=1 SV=1;tr|F5H0P4|F5H0P4_HUMAN Porphobilinogen deaminase (Fragment) OS=Homo sapiens GN=HMBS PE=1 S	7	1	1	1	1	1	1	1	1	1	1	1	1	1	1	1	1	1	1	1	1	1	1	1	1	1	1	1	1	1	1	17.5	17.5	17.5	6.9278	63	63;81;119;187;191;330;361	0	3.1018	By matching	By matching	By matching
F5GYN4;J3KR44;F5GYJ8;Q96FW1;F5H6Q1;F5H3F0	F5GYN4;J3KR44;F5GYJ8;Q96FW1;F5H6Q1	4;4;4;4;3;1	4;4;4;4;3;1	4;4;4;4;3;1	Ubiquitin thioesterase OTUB1	OTUB1	tr|F5GYN4|F5GYN4_HUMAN Ubiquitin thioesterase OTUB1 OS=Homo sapiens GN=OTUB1 PE=1 SV=1;tr|J3KR44|J3KR44_HUMAN Ubiquitin thioesterase OTUB1 OS=Homo sapiens GN=OTUB1 PE=1 SV=2;tr|F5GYJ8|F5GYJ8_HUMAN Ubiquitin thioesterase OTUB1 OS=Homo sapiens GN=OTUB1 PE=1	6	4	4	4	3	4	4	3	3	4	3	4	1	3	4	4	3	3	4	3	4	1	3	4	4	3	3	4	3	4	1	21.2	21.2	21.2	28.05	241	241;272;286;271;280;170	0	10.55	By MS/MS	By MS/MS	By MS/MS
F5GZ78;P49023;F5H836;H0YIE4	F5GZ78;P49023;F5H836	4;4;2;1	4;4;2;1	4;4;2;1	Paxillin	PXN	tr|F5GZ78|F5GZ78_HUMAN Paxillin OS=Homo sapiens GN=PXN PE=1 SV=1;sp|P49023|PAXI_HUMAN Paxillin OS=Homo sapiens GN=PXN PE=1 SV=3;tr|F5H836|F5H836_HUMAN Paxillin (Fragment) OS=Homo sapiens GN=PXN PE=1 SV=7	4	4	4	4	4	4	3	4	3	4	4	4	3	4	4	3	4	3	4	4	4	3	4	4	3	4	3	4	4	4	3	10.4	10.4	10.4	64.232	589	589;591;177;171	0	13.8	By MS/MS	By MS/MS	By MS/MS
F5H867;F5H0E2;H0YFS2;F5GZS6;J3KPF3;P08195	F5H867;F5H0E2;H0YFS2;F5GZS6;J3KPF3;P08195	1;1;1;1;1;1	1;1;1;1;1;1	1;1;1;1;1;1	4F2 cell-surface antigen heavy chain	SLC3A2	tr|F5H867|F5H867_HUMAN 4F2 cell-surface antigen heavy chain (Fragment) OS=Homo sapiens GN=SLC3A2 PE=1 SV=1;tr|F5H0E2|F5H0E2_HUMAN 4F2 cell-surface antigen heavy chain (Fragment) OS=Homo sapiens GN=SLC3A2 PE=1 SV=1;tr|H0YFS2|H0YFS2_HUMAN 4F2 cell-surface an	6	1	1	1	1	0	1	1	1	1	1	1	1	1	0	1	1	1	1	1	1	1	1	0	1	1	1	1	1	1	1	9.6	9.6	9.6	14.757	135	135;145;247;599;631;630	0	3.2683	By matching		By MS/MS
F5H2F4;P11586;V9GYY3	F5H2F4;P11586	9;9;1	9;9;1	9;9;1	C-1-tetrahydrofolate synthase, cytoplasmic;Methylenetetrahydrofolate dehydrogenase;Methenyltetrahydrofolate cyclohydrolase;Formyltetrahydrofolate synthetase;C-1-tetrahydrofolate synthase, cytoplasmic, N-terminally processed	MTHFD1	tr|F5H2F4|F5H2F4_HUMAN C-1-tetrahydrofolate synthase, cytoplasmic OS=Homo sapiens GN=MTHFD1 PE=1 SV=1;sp|P11586|C1TC_HUMAN C-1-tetrahydrofolate synthase, cytoplasmic OS=Homo sapiens GN=MTHFD1 PE=1 SV=3	3	9	9	9	8	5	9	6	5	6	6	7	4	8	5	9	6	5	6	6	7	4	8	5	9	6	5	6	6	7	4	10.7	10.7	10.7	110.61	1020	1020;935;107	0	26.32	By MS/MS	By MS/MS	By MS/MS
F5H442;Q99816	F5H442;Q99816	2;2	2;2	2;2	Tumor susceptibility gene 101 protein	TSG101	tr|F5H442|F5H442_HUMAN Tumor susceptibility gene 101 protein OS=Homo sapiens GN=TSG101 PE=1 SV=1;sp|Q99816|TS101_HUMAN Tumor susceptibility gene 101 protein OS=Homo sapiens GN=TSG101 PE=1 SV=2	2	2	2	2	0	1	2	2	2	2	2	2	0	0	1	2	2	2	2	2	2	0	0	1	2	2	2	2	2	2	0	6.6	6.6	6.6	40.917	365	365;390	0	4.8574		By MS/MS	By MS/MS
F8W118;F8VY35;F8VV59;F5H4R6;H0YIV4;P55209;H0YH88;H0YHC3;F8W020;F8VXI6;F8VUX1;F8W543;B7Z9C2;F8W0J6;F8VRJ2;F8VVB5	F8W118;F8VY35;F8VV59;F5H4R6;H0YIV4;P55209;H0YH88;H0YHC3;F8W020;F8VXI6;F8VUX1;F8W543;B7Z9C2;F8W0J6;F8VRJ2	7;7;7;7;7;7;6;6;6;6;6;6;6;6;5;3	7;7;7;7;7;7;6;6;6;6;6;6;6;6;5;3	6;6;6;6;6;6;5;5;5;5;5;5;5;5;4;2	Nucleosome assembly protein 1-like 1	NAP1L1	tr|F8W118|F8W118_HUMAN Nucleosome assembly protein 1-like 1 (Fragment) OS=Homo sapiens GN=NAP1L1 PE=1 SV=1;tr|F8VY35|F8VY35_HUMAN Nucleosome assembly protein 1-like 1 (Fragment) OS=Homo sapiens GN=NAP1L1 PE=1 SV=1;tr|F8VV59|F8VV59_HUMAN Nucleosome assembly	16	7	7	6	5	6	5	7	7	5	6	7	6	5	6	5	7	7	5	6	7	6	4	5	4	6	6	4	5	6	5	46.9	46.9	42.1	24.694	209	209;264;327;383;385;391;177;198;207;215;237;328;349;379;114;161	0	48.798	By MS/MS	By MS/MS	By MS/MS
F5H5D3;Q9BQE3;F8VVB9;F8VQQ4;F8VRZ4;F8VS66;F8VX09;F8VWV9;C9JEV8;C9JQ00;C9JJQ8;C9K0S6;F8VRK0;C9JDL2;F8VXZ7;F8W0F6;Q9H853	F5H5D3;Q9BQE3;F8VVB9	15;15;8;7;5;5;4;4;3;3;3;2;2;2;1;1;1	1;1;0;0;0;0;0;0;0;0;0;0;0;0;0;0;0	1;1;0;0;0;0;0;0;0;0;0;0;0;0;0;0;0	Tubulin alpha-1C chain	TUBA1C;TUBA1B	tr|F5H5D3|F5H5D3_HUMAN Tubulin alpha-1C chain OS=Homo sapiens GN=TUBA1C PE=1 SV=1;sp|Q9BQE3|TBA1C_HUMAN Tubulin alpha-1C chain OS=Homo sapiens GN=TUBA1C PE=1 SV=1;tr|F8VVB9|F8VVB9_HUMAN Tubulin alpha-1B chain (Fragment) OS=Homo sapiens GN=TUBA1B PE=1 SV=7	17	15	1	1	12	13	14	12	14	15	14	14	14	1	1	1	0	1	1	1	1	1	1	1	1	0	1	1	1	1	1	39.1	4.6	4.6	57.73	519	519;449;247;219;112;130;75;81;153;180;198;47;49;120;26;231;241	0	3.1725	By matching	By matching	By MS/MS
F5H5G4;Q9Y2W2;F5GXS9	F5H5G4;Q9Y2W2;F5GXS9	2;2;1	2;2;1	2;2;1	WW domain-binding protein 11	WBP11	tr|F5H5G4|F5H5G4_HUMAN WW domain-binding protein 11 OS=Homo sapiens GN=WBP11 PE=1 SV=1;sp|Q9Y2W2|WBP11_HUMAN WW domain-binding protein 11 OS=Homo sapiens GN=WBP11 PE=1 SV=1;tr|F5GXS9|F5GXS9_HUMAN WW domain-binding protein 11 (Fragment) OS=Homo sapiens GN=W	3	2	2	2	0	2	2	2	0	2	0	1	1	0	2	2	2	0	2	0	1	1	0	2	2	2	0	2	0	1	1	13.4	13.4	13.4	23.162	194	194;641;53	0	3.6394		By MS/MS	By MS/MS
F5H6P7;P61326;Q96A72	F5H6P7;P61326;Q96A72	2;2;2	2;2;2	2;2;2	Protein mago nashi homolog;Protein mago nashi homolog 2	MAGOHB;MAGOH	tr|F5H6P7|F5H6P7_HUMAN Protein mago nashi homolog 2 OS=Homo sapiens GN=MAGOHB PE=4 SV=1;sp|P61326|MGN_HUMAN Protein mago nashi homolog OS=Homo sapiens GN=MAGOH PE=1 SV=1;sp|Q96A72|MGN2_HUMAN Protein mago nashi homolog 2 OS=Homo sapiens GN=MAGOHB PE=1 SV=1	3	2	2	2	1	0	1	0	1	0	1	1	0	1	0	1	0	1	0	1	1	0	1	0	1	0	1	0	1	1	0	20.6	20.6	20.6	11.799	102	102;146;148	0	5.3818	By MS/MS		By MS/MS
G5EA44;F5H7W8;Q96C57;F5H3K2;F5H8B7;E7ENF1	G5EA44;F5H7W8;Q96C57;F5H3K2;F5H8B7;E7ENF1	2;2;2;1;1;1	2;2;2;1;1;1	2;2;2;1;1;1	Uncharacterized protein C12orf43	C12orf43	tr|G5EA44|G5EA44_HUMAN Chromosome 12 open reading frame 43, isoform CRA_b OS=Homo sapiens GN=C12orf43 PE=1 SV=1;tr|F5H7W8|F5H7W8_HUMAN Chromosome 12 open reading frame 43, isoform CRA_a OS=Homo sapiens GN=C12orf43 PE=1 SV=2;sp|Q96C57|CL043_HUMAN Uncharacte	6	2	2	2	1	1	2	2	2	2	2	2	2	1	1	2	2	2	2	2	2	2	1	1	2	2	2	2	2	2	2	15.5	15.5	15.5	27.048	252	252;293;262;188;195;221	0	27.266	By MS/MS	By MS/MS	By MS/MS
H3BTB3;H3BMQ5;H3BN59;I3L0H8;F6QDS0;H3BQK0;Q9NUU7;Q9UMR2	H3BTB3;H3BMQ5;H3BN59;I3L0H8;F6QDS0;H3BQK0;Q9NUU7;Q9UMR2	1;1;1;1;1;1;1;1	1;1;1;1;1;1;1;1	1;1;1;1;1;1;1;1	ATP-dependent RNA helicase DDX19A;ATP-dependent RNA helicase DDX19B	DDX19A;DDX19B	tr|H3BTB3|H3BTB3_HUMAN ATP-dependent RNA helicase DDX19A OS=Homo sapiens GN=DDX19A PE=1 SV=1;tr|H3BMQ5|H3BMQ5_HUMAN ATP-dependent RNA helicase DDX19B (Fragment) OS=Homo sapiens GN=DDX19B PE=1 SV=1;tr|H3BN59|H3BN59_HUMAN Uncharacterized protein (Fragment) O	8	1	1	1	1	1	1	1	1	1	1	1	1	1	1	1	1	1	1	1	1	1	1	1	1	1	1	1	1	1	1	11.6	11.6	11.6	14.479	129	129;233;261;447;479;484;478;479	0	6.659	By MS/MS	By MS/MS	By MS/MS
F6TLX2;I3L1I0	F6TLX2	16;3	16;3	0;0		GLOD4	tr|F6TLX2|F6TLX2_HUMAN Glyoxalase domain-containing protein 4 OS=Homo sapiens GN=GLOD4 PE=1 SV=1	2	16	16	0	13	14	13	14	15	14	15	15	14	13	14	13	14	15	14	15	15	14	0	0	0	0	0	0	0	0	0	34.1	34.1	0	54.719	502	502;115	0	70.038	By MS/MS	By MS/MS	By MS/MS
F8VPD4;P27708	F8VPD4;P27708	2;2	2;2	2;2	CAD protein;Glutamine-dependent carbamoyl-phosphate synthase;Aspartate carbamoyltransferase;Dihydroorotase	CAD	tr|F8VPD4|F8VPD4_HUMAN CAD protein OS=Homo sapiens GN=CAD PE=1 SV=1;sp|P27708|PYR1_HUMAN CAD protein OS=Homo sapiens GN=CAD PE=1 SV=3	2	2	2	2	0	2	2	2	2	1	2	2	0	0	2	2	2	2	1	2	2	0	0	2	2	2	2	1	2	2	0	1.2	1.2	1.2	236.02	2162	2162;2225	0	6.0596		By MS/MS	By MS/MS
F8VVL1;O43583	F8VVL1;O43583	3;3	3;3	3;3	Density-regulated protein	DENR	tr|F8VVL1|F8VVL1_HUMAN Density-regulated protein OS=Homo sapiens GN=DENR PE=1 SV=1;sp|O43583|DENR_HUMAN Density-regulated protein OS=Homo sapiens GN=DENR PE=1 SV=2	2	3	3	3	1	3	2	3	2	2	1	3	1	1	3	2	3	2	2	1	3	1	1	3	2	3	2	2	1	3	1	24.4	24.4	24.4	17.77	160	160;198	0	7.0672	By matching	By MS/MS	By MS/MS
F8VYE8;F8W0W8;P36873;E9PMD7;F8VR82;P62140;P62136;A0A087WYY5	F8VYE8;F8W0W8;P36873;E9PMD7;F8VR82;P62140;P62136	3;3;3;2;2;2;2;1	3;3;3;2;2;2;2;1	3;3;3;2;2;2;2;1	Serine/threonine-protein phosphatase;Serine/threonine-protein phosphatase PP1-gamma catalytic subunit;Serine/threonine-protein phosphatase PP1-beta catalytic subunit;Serine/threonine-protein phosphatase PP1-alpha catalytic subunit	PPP1CC;PPP1CA;PPP1CB	tr|F8VYE8|F8VYE8_HUMAN Serine/threonine-protein phosphatase OS=Homo sapiens GN=PPP1CC PE=1 SV=1;tr|F8W0W8|F8W0W8_HUMAN Serine/threonine-protein phosphatase OS=Homo sapiens GN=PPP1CC PE=1 SV=1;sp|P36873|PP1G_HUMAN Serine/threonine-protein phosphatase PP1-ga	8	3	3	3	1	0	2	1	0	1	1	2	0	1	0	2	1	0	1	1	2	0	1	0	2	1	0	1	1	2	0	10.5	10.5	10.5	34.95	304	304;332;323;253;270;327;330;140	0	7.4317	By matching		By MS/MS
F8VZG5;F8W1A4;P54819;G3V213;F8VY04;F8VPP1	F8VZG5;F8W1A4;P54819;G3V213;F8VY04	5;5;5;4;4;2	5;5;5;4;4;2	5;5;5;4;4;2	Adenylate kinase 2, mitochondrial;Adenylate kinase 2, mitochondrial;Adenylate kinase 2, mitochondrial, N-terminally processed	AK2	tr|F8VZG5|F8VZG5_HUMAN Adenylate kinase 2, mitochondrial OS=Homo sapiens GN=AK2 PE=1 SV=1;tr|F8W1A4|F8W1A4_HUMAN Adenylate kinase 2, mitochondrial OS=Homo sapiens GN=AK2 PE=1 SV=1;sp|P54819|KAD2_HUMAN Adenylate kinase 2, mitochondrial OS=Homo sapiens GN=AK	6	5	5	5	0	2	4	1	1	1	1	3	2	0	2	4	1	1	1	1	3	2	0	2	4	1	1	1	1	3	2	34.6	34.6	34.6	17.499	162	162;232;239;133;190;42	0	13.25		By MS/MS	By MS/MS
F8W6I7;P09651;F8VZ49;Q32P51;F8VTQ5;F8VYN5;H0YH80;F8W646	F8W6I7;P09651;F8VZ49;Q32P51;F8VTQ5	11;11;9;8;6;5;5;4	11;11;9;8;6;5;5;4	10;10;8;7;5;4;5;4	Heterogeneous nuclear ribonucleoprotein A1;Heterogeneous nuclear ribonucleoprotein A1, N-terminally processed;Heterogeneous nuclear ribonucleoprotein A1-like 2	HNRNPA1;HNRNPA1L2	tr|F8W6I7|F8W6I7_HUMAN Heterogeneous nuclear ribonucleoprotein A1 OS=Homo sapiens GN=HNRNPA1 PE=1 SV=2;sp|P09651|ROA1_HUMAN Heterogeneous nuclear ribonucleoprotein A1 OS=Homo sapiens GN=HNRNPA1 PE=1 SV=5;tr|F8VZ49|F8VZ49_HUMAN Heterogeneous nuclear ribonuc	8	11	11	10	9	10	11	10	10	11	11	11	9	9	10	11	10	10	11	11	11	9	8	9	10	9	9	10	10	10	8	49.2	49.2	46.3	33.155	307	307;372;231;320;145;113;191;156	0	65.605	By MS/MS	By MS/MS	By MS/MS
F8W7C6;A0A087WV22;X1WI28;P27635;H7C123;H7C2C5;Q96L21;B8A6G2;A6QRI9	F8W7C6;A0A087WV22;X1WI28;P27635;H7C123;H7C2C5	7;6;6;6;4;4;3;1;1	7;6;6;6;4;4;3;1;1	7;6;6;6;4;4;3;1;1	60S ribosomal protein L10	RPL10	tr|F8W7C6|F8W7C6_HUMAN 60S ribosomal protein L10 OS=Homo sapiens GN=RPL10 PE=1 SV=2;tr|A0A087WV22|A0A087WV22_HUMAN 60S ribosomal protein L10 OS=Homo sapiens GN=RPL10 PE=1 SV=1;tr|X1WI28|X1WI28_HUMAN 60S ribosomal protein L10 (Fragment) OS=Homo sapiens GN=R	9	7	7	7	7	7	7	7	7	7	7	7	7	7	7	7	7	7	7	7	7	7	7	7	7	7	7	7	7	7	7	49.1	49.1	49.1	18.565	163	163;178;201;214;91;131;214;108;181	0	40.359	By MS/MS	By MS/MS	By MS/MS
F8W7Q4;Q96A26;E9PH05	F8W7Q4;Q96A26;E9PH05	2;2;1	2;2;1	2;2;1	Protein FAM162A	FAM162A	tr|F8W7Q4|F8W7Q4_HUMAN Protein FAM162A OS=Homo sapiens GN=FAM162A PE=1 SV=1;sp|Q96A26|F162A_HUMAN Protein FAM162A OS=Homo sapiens GN=FAM162A PE=1 SV=2;tr|E9PH05|E9PH05_HUMAN Protein FAM162A OS=Homo sapiens GN=FAM162A PE=1 SV=1	3	2	2	2	1	0	2	2	1	2	1	2	0	1	0	2	2	1	2	1	2	0	1	0	2	2	1	2	1	2	0	19.4	19.4	19.4	16.515	144	144;154;141	0	3.8524	By matching		By MS/MS
F8W7T0;Q9UGI8	F8W7T0;Q9UGI8	1;1	1;1	1;1	Testin	TES	tr|F8W7T0|F8W7T0_HUMAN Testin (Fragment) OS=Homo sapiens GN=TES PE=1 SV=1;sp|Q9UGI8|TES_HUMAN Testin OS=Homo sapiens GN=TES PE=1 SV=1	2	1	1	1	1	0	1	1	1	0	1	1	1	1	0	1	1	1	0	1	1	1	1	0	1	1	1	0	1	1	1	15.2	15.2	15.2	8.9703	79	79;421	0	3.1318	By matching		By MS/MS
F8WBL2;Q13895	F8WBL2;Q13895	2;2	2;2	2;2	Bystin	BYSL	tr|F8WBL2|F8WBL2_HUMAN Bystin OS=Homo sapiens GN=BYSL PE=1 SV=1;sp|Q13895|BYST_HUMAN Bystin OS=Homo sapiens GN=BYSL PE=1 SV=3	2	2	2	2	2	2	1	1	1	2	0	2	1	2	2	1	1	1	2	0	2	1	2	2	1	1	1	2	0	2	1	17	17	17	21.394	194	194;437	0	4.228	By MS/MS	By matching	By MS/MS
K7ENK9;K7EKX0;J3QRU4;F8WCA0;L7N2F9;Q15836;P63027	K7ENK9;K7EKX0;J3QRU4;F8WCA0;L7N2F9;Q15836;P63027	1;1;1;1;1;1;1	1;1;1;1;1;1;1	1;1;1;1;1;1;1	Vesicle-associated membrane protein 3;Vesicle-associated membrane protein 2	VAMP2;VAMP3	tr|K7ENK9|K7ENK9_HUMAN Vesicle-associated membrane protein 2 OS=Homo sapiens GN=VAMP2 PE=4 SV=1;tr|K7EKX0|K7EKX0_HUMAN Vesicle-associated membrane protein 3 OS=Homo sapiens GN=VAMP3 PE=4 SV=1;tr|J3QRU4|J3QRU4_HUMAN Vesicle-associated membrane protein 2 OS=	7	1	1	1	1	1	1	1	1	0	1	1	1	1	1	1	1	1	0	1	1	1	1	1	1	1	1	0	1	1	1	25	25	25	7.7752	68	68;72;113;118;121;100;116	0	3.8468	By MS/MS	By MS/MS	By MS/MS
F8WJN3;Q16630;F8W084	F8WJN3;Q16630	11;11;2	11;11;2	11;11;2	Cleavage and polyadenylation specificity factor subunit 6	CPSF6	tr|F8WJN3|F8WJN3_HUMAN Cleavage and polyadenylation-specificity factor subunit 6 OS=Homo sapiens GN=CPSF6 PE=1 SV=1;sp|Q16630|CPSF6_HUMAN Cleavage and polyadenylation specificity factor subunit 6 OS=Homo sapiens GN=CPSF6 PE=1 SV=2	3	11	11	11	11	10	11	10	11	10	9	11	10	11	10	11	10	11	10	9	11	10	11	10	11	10	11	10	9	11	10	29.1	29.1	29.1	52.269	478	478;551;107	0	99.253	By MS/MS	By MS/MS	By MS/MS
G3V279;P84090	G3V279;P84090	1;1	1;1	1;1	Enhancer of rudimentary homolog	ERH	tr|G3V279|G3V279_HUMAN Enhancer of rudimentary homolog OS=Homo sapiens GN=ERH PE=1 SV=1;sp|P84090|ERH_HUMAN Enhancer of rudimentary homolog OS=Homo sapiens GN=ERH PE=1 SV=1	2	1	1	1	0	0	0	0	1	0	0	0	0	0	0	0	0	1	0	0	0	0	0	0	0	0	1	0	0	0	0	15.5	15.5	15.5	8.2033	71	71;104	0	3.0606
G3V3A4;Q13573;G3V4X8;G3V5R3	G3V3A4;Q13573;G3V4X8	3;3;2;1	3;3;2;1	3;3;2;1	SNW domain-containing protein 1	SNW1	tr|G3V3A4|G3V3A4_HUMAN SNW domain-containing protein 1 OS=Homo sapiens GN=SNW1 PE=1 SV=1;sp|Q13573|SNW1_HUMAN SNW domain-containing protein 1 OS=Homo sapiens GN=SNW1 PE=1 SV=1;tr|G3V4X8|G3V4X8_HUMAN SNW domain-containing protein 1 OS=Homo sapiens GN=SNW1 P	4	3	3	3	0	0	2	1	2	2	1	2	2	0	0	2	1	2	2	1	2	2	0	0	2	1	2	2	1	2	2	8.4	8.4	8.4	65.391	571	571;536;374;185	0	5.4556			By MS/MS
H0YJF9;G3V5M3;G3V3F0;Q86SW4;P36957	H0YJF9;G3V5M3;G3V3F0;Q86SW4;P36957	1;1;1;1;1	1;1;1;1;1	1;1;1;1;1	Dihydrolipoyllysine-residue succinyltransferase component of 2-oxoglutarate dehydrogenase complex, mitochondrial	DLST	tr|H0YJF9|H0YJF9_HUMAN Dihydrolipoyllysine-residue succinyltransferase component of 2-oxoglutarate dehydrogenase complex, mitochondrial (Fragment) OS=Homo sapiens GN=DLST PE=1 SV=1;tr|G3V5M3|G3V5M3_HUMAN Dihydrolipoyllysine-residue succinyltransferase comp	5	1	1	1	0	1	1	0	0	0	1	1	0	0	1	1	0	0	0	1	1	0	0	1	1	0	0	0	1	1	0	18.9	18.9	18.9	8.3194	74	74;83;104;279;453	0	5.1379		By matching	By MS/MS
G3V3G9;Q5TAQ9;V9GY54;V9GYQ9;Q5TAQ8	G3V3G9;Q5TAQ9;V9GY54	4;4;3;1;1	4;4;3;1;1	4;4;3;1;1	DDB1- and CUL4-associated factor 8	DCAF8	tr|G3V3G9|G3V3G9_HUMAN Uncharacterized protein OS=Homo sapiens PE=4 SV=1;sp|Q5TAQ9|DCAF8_HUMAN DDB1- and CUL4-associated factor 8 OS=Homo sapiens GN=DCAF8 PE=1 SV=1;tr|V9GY54|V9GY54_HUMAN DDB1- and CUL4-associated factor 8 OS=Homo sapiens GN=DCAF8 PE=1 SV=	5	4	4	4	2	3	3	2	4	2	1	3	2	2	3	3	2	4	2	1	3	2	2	3	3	2	4	2	1	3	2	7.2	7.2	7.2	84.752	751	751;597;417;125;212	0	11.829	By MS/MS	By matching	By MS/MS
G3V5Q1;G3V3M6;P27695;A0A0C4DGK8;G3V3C7;G3V5M0;G3V359;G3V5D9;H7C4A8;G3V3Y6;G3V2D9	G3V5Q1;G3V3M6;P27695;A0A0C4DGK8;G3V3C7;G3V5M0;G3V359;G3V5D9;H7C4A8	8;8;8;6;6;5;5;4;4;1;1	8;8;8;6;6;5;5;4;4;1;1	8;8;8;6;6;5;5;4;4;1;1	DNA-(apurinic or apyrimidinic site) lyase;DNA-(apurinic or apyrimidinic site) lyase, mitochondrial	APEX1	tr|G3V5Q1|G3V5Q1_HUMAN DNA-(apurinic or apyrimidinic site) lyase (Fragment) OS=Homo sapiens GN=APEX1 PE=1 SV=1;tr|G3V3M6|G3V3M6_HUMAN DNA-(apurinic or apyrimidinic site) lyase (Fragment) OS=Homo sapiens GN=APEX1 PE=1 SV=1;sp|P27695|APEX1_HUMAN DNA-(apurini	11	8	8	8	5	5	7	5	7	7	7	7	5	5	5	7	5	7	7	7	7	5	5	5	7	5	7	7	7	7	5	45.5	45.5	45.5	27.125	242	242;263;318;146;174;162;172;108;150;42;49	0	22.399	By MS/MS	By MS/MS	By MS/MS
H0YJS4;G3V4T5;P05198	H0YJS4;G3V4T5;P05198	2;2;2	2;2;2	2;2;2	Eukaryotic translation initiation factor 2 subunit 1	EIF2S1	tr|H0YJS4|H0YJS4_HUMAN Eukaryotic translation initiation factor 2 subunit 1 (Fragment) OS=Homo sapiens GN=EIF2S1 PE=1 SV=1;tr|G3V4T5|G3V4T5_HUMAN Eukaryotic translation initiation factor 2 subunit 1 (Fragment) OS=Homo sapiens GN=EIF2S1 PE=1 SV=1;sp|P05198|	3	2	2	2	1	2	2	1	0	0	0	1	0	1	2	2	1	0	0	0	1	0	1	2	2	1	0	0	0	1	0	9.1	9.1	9.1	28.865	252	252;273;315	0	3.6513	By matching	By matching	By MS/MS
G3V5L5;G3V580;O14744;G3V2L6;G3V2X6;C9JSX3;H0YJX6	G3V5L5;G3V580;O14744;G3V2L6	3;3;3;2;1;1;1	3;3;3;2;1;1;1	3;3;3;2;1;1;1	Protein arginine N-methyltransferase 5;Protein arginine N-methyltransferase 5, N-terminally processed	PRMT5	tr|G3V5L5|G3V5L5_HUMAN Protein arginine N-methyltransferase 5 (Fragment) OS=Homo sapiens GN=PRMT5 PE=1 SV=7;tr|G3V580|G3V580_HUMAN Protein arginine N-methyltransferase 5 (Fragment) OS=Homo sapiens GN=PRMT5 PE=1 SV=1;sp|O14744|ANM5_HUMAN Protein arginine N-	7	3	3	3	2	2	2	2	2	1	1	3	1	2	2	2	2	2	1	1	3	1	2	2	2	2	2	1	1	3	1	21.8	21.8	21.8	19.73	170	170;180;637;183;185;186;279	0	6.8092	By matching	By MS/MS	By MS/MS
G3V5Z7;P60900;G3V3I1;G3V295;G3V3U4;H0YJC4;G3V4S5;G3V2S7	G3V5Z7;P60900;G3V3I1;G3V295;G3V3U4	5;5;4;4;3;2;1;1	5;5;4;4;3;2;1;1	5;5;4;4;3;2;1;1	Proteasome subunit alpha type;Proteasome subunit alpha type-6	PSMA6	tr|G3V5Z7|G3V5Z7_HUMAN Proteasome subunit alpha type OS=Homo sapiens GN=PSMA6 PE=1 SV=1;sp|P60900|PSA6_HUMAN Proteasome subunit alpha type-6 OS=Homo sapiens GN=PSMA6 PE=1 SV=1;tr|G3V3I1|G3V3I1_HUMAN Proteasome subunit alpha type OS=Homo sapiens GN=PSMA6 PE	8	5	5	5	2	1	4	2	3	0	1	3	1	2	1	4	2	3	0	1	3	1	2	1	4	2	3	0	1	3	1	25.4	25.4	25.4	28.147	252	252;246;148;203;107;85;41;67	0	12.303	By MS/MS	By MS/MS	By MS/MS
G3XAI9;Q5BKY9;Q8N9E0;C9JUX2	G3XAI9;Q5BKY9;Q8N9E0	6;6;3;2	6;6;3;2	6;6;3;2	Protein FAM133B;Protein FAM133A	FAM133B;FAM133A	tr|G3XAI9|G3XAI9_HUMAN Protein FAM133B OS=Homo sapiens GN=FAM133B PE=1 SV=1;sp|Q5BKY9|F133B_HUMAN Protein FAM133B OS=Homo sapiens GN=FAM133B PE=1 SV=1;sp|Q8N9E0|F133A_HUMAN Protein FAM133A OS=Homo sapiens GN=FAM133A PE=1 SV=1	4	6	6	6	6	6	5	6	5	6	6	6	6	6	6	5	6	5	6	6	6	6	6	6	5	6	5	6	6	6	6	41	41	41	12.41	105	105;247;248;30	0	44.21	By MS/MS	By MS/MS	By MS/MS
G5EA50;Q6ZN18;H0YH08;H7BYT4	G5EA50;Q6ZN18;H0YH08;H7BYT4	2;2;1;1	2;2;1;1	2;2;1;1	Zinc finger protein AEBP2	AEBP2	tr|G5EA50|G5EA50_HUMAN AE binding protein 2, isoform CRA_a OS=Homo sapiens GN=AEBP2 PE=1 SV=1;sp|Q6ZN18|AEBP2_HUMAN Zinc finger protein AEBP2 OS=Homo sapiens GN=AEBP2 PE=1 SV=2;tr|H0YH08|H0YH08_HUMAN Zinc finger protein AEBP2 (Fragment) OS=Homo sapiens GN=	4	2	2	2	0	1	2	2	1	1	1	1	2	0	1	2	2	1	1	1	1	2	0	1	2	2	1	1	1	1	2	9.1	9.1	9.1	30.729	274	274;517;130;140	0	4.8916		By MS/MS	By MS/MS
G8JLG1;Q14683	G8JLG1;Q14683	1;1	1;1	1;1	Structural maintenance of chromosomes protein;Structural maintenance of chromosomes protein 1A	SMC1A	tr|G8JLG1|G8JLG1_HUMAN Structural maintenance of chromosomes protein OS=Homo sapiens GN=SMC1A PE=1 SV=2;sp|Q14683|SMC1A_HUMAN Structural maintenance of chromosomes protein 1A OS=Homo sapiens GN=SMC1A PE=1 SV=2	2	1	1	1	0	0	0	0	0	0	1	1	0	0	0	0	0	0	0	1	1	0	0	0	0	0	0	0	1	1	0	1.1	1.1	1.1	140.86	1211	1211;1233	0	3.4341
Q2L6G8;G8JLG2;Q15517	Q2L6G8;G8JLG2;Q15517	2;2;2	2;2;2	2;2;2	Corneodesmosin	CDSN	tr|Q2L6G8|Q2L6G8_HUMAN Corneodesmosin OS=Homo sapiens GN=CDSN PE=1 SV=1;tr|G8JLG2|G8JLG2_HUMAN Corneodesmosin OS=Homo sapiens GN=CDSN PE=1 SV=1;sp|Q15517|CDSN_HUMAN Corneodesmosin OS=Homo sapiens GN=CDSN PE=1 SV=3	3	2	2	2	2	2	2	0	1	2	2	2	2	2	2	2	0	1	2	2	2	2	2	2	2	0	1	2	2	2	2	5.1	5.1	5.1	51.539	529	529;529;529	0	3.8911	By MS/MS	By MS/MS	By MS/MS
H0Y2V6;Q5SW79;H0YB92	H0Y2V6;Q5SW79	4;4;1	4;4;1	4;4;1	Centrosomal protein of 170 kDa	CEP170	tr|H0Y2V6|H0Y2V6_HUMAN Centrosomal protein of 170 kDa (Fragment) OS=Homo sapiens GN=CEP170 PE=1 SV=1;sp|Q5SW79|CE170_HUMAN Centrosomal protein of 170 kDa OS=Homo sapiens GN=CEP170 PE=1 SV=1	3	4	4	4	3	3	1	2	2	3	2	2	3	3	3	1	2	2	3	2	2	3	3	3	1	2	2	3	2	2	3	4.2	4.2	4.2	171.97	1558	1558;1584;173	0	9.3752	By MS/MS	By MS/MS	By MS/MS
H0Y3K0;O60684;O15131;P52294	H0Y3K0;O60684;O15131;P52294	1;1;1;1	1;1;1;1	1;1;1;1	Importin subunit alpha-7;Importin subunit alpha-6;Importin subunit alpha-5;Importin subunit alpha-5, N-terminally processed	KPNA5;KPNA6;KPNA1	tr|H0Y3K0|H0Y3K0_HUMAN Importin subunit alpha-6 (Fragment) OS=Homo sapiens GN=KPNA5 PE=1 SV=1;sp|O60684|IMA7_HUMAN Importin subunit alpha-7 OS=Homo sapiens GN=KPNA6 PE=1 SV=1;sp|O15131|IMA6_HUMAN Importin subunit alpha-6 OS=Homo sapiens GN=KPNA5 PE=1 SV=2;	4	1	1	1	0	0	0	0	0	0	0	1	1	0	0	0	0	0	0	0	1	1	0	0	0	0	0	0	0	1	1	12.3	12.3	12.3	13.778	122	122;536;536;538	0	3.1323
H0Y3Y9;Q5VWC4;P55036	H0Y3Y9;Q5VWC4;P55036	1;1;1	1;1;1	1;1;1	26S proteasome non-ATPase regulatory subunit 4	PSMD4	tr|H0Y3Y9|H0Y3Y9_HUMAN 26S proteasome non-ATPase regulatory subunit 4 (Fragment) OS=Homo sapiens GN=PSMD4 PE=1 SV=1;tr|Q5VWC4|Q5VWC4_HUMAN 26S proteasome non-ATPase regulatory subunit 4 OS=Homo sapiens GN=PSMD4 PE=1 SV=1;sp|P55036|PSMD4_HUMAN 26S proteasom	3	1	1	1	0	0	0	0	0	0	0	1	0	0	0	0	0	0	0	0	1	0	0	0	0	0	0	0	0	1	0	5.2	5.2	5.2	21.007	193	193;380;377	0	3.5205
H0YID2;H0Y4J6;Q5T9B7;P00568	H0YID2;H0Y4J6;Q5T9B7;P00568	1;1;1;1	1;1;1;1	1;1;1;1	Adenylate kinase isoenzyme 1	AK1	tr|H0YID2|H0YID2_HUMAN Adenylate kinase isoenzyme 1 (Fragment) OS=Homo sapiens GN=AK1 PE=1 SV=1;tr|H0Y4J6|H0Y4J6_HUMAN Adenylate kinase isoenzyme 1 (Fragment) OS=Homo sapiens GN=AK1 PE=1 SV=1;tr|Q5T9B7|Q5T9B7_HUMAN Adenylate kinase isoenzyme 1 OS=Homo sapi	4	1	1	1	0	0	1	1	1	0	0	0	1	0	0	1	1	1	0	0	0	1	0	0	1	1	1	0	0	0	1	19.6	19.6	19.6	5.8316	51	51;135;210;194	0	3.6859			By MS/MS
H0Y4R1;P12268;E7ETK5;C9K0R9;C9J381;P20839	H0Y4R1;P12268	7;7;3;1;1;1	7;7;3;1;1;1	7;7;3;1;1;1	Inosine-5-monophosphate dehydrogenase 2	IMPDH2	tr|H0Y4R1|H0Y4R1_HUMAN Inosine-5-monophosphate dehydrogenase 2 (Fragment) OS=Homo sapiens GN=IMPDH2 PE=1 SV=1;sp|P12268|IMDH2_HUMAN Inosine-5-monophosphate dehydrogenase 2 OS=Homo sapiens GN=IMPDH2 PE=1 SV=2	6	7	7	7	4	5	4	5	5	3	3	6	6	4	5	4	5	5	3	3	6	6	4	5	4	5	5	3	3	6	6	20.2	20.2	20.2	50.957	470	470;514;279;289;513;514	0	30.865	By MS/MS	By MS/MS	By MS/MS
H0Y4Y4;Q96C19	H0Y4Y4;Q96C19	1;1	1;1	1;1	EF-hand domain-containing protein D2	EFHD2	tr|H0Y4Y4|H0Y4Y4_HUMAN EF-hand domain-containing protein D2 (Fragment) OS=Homo sapiens GN=EFHD2 PE=1 SV=1;sp|Q96C19|EFHD2_HUMAN EF-hand domain-containing protein D2 OS=Homo sapiens GN=EFHD2 PE=1 SV=1	2	1	1	1	1	1	1	1	1	1	1	1	1	1	1	1	1	1	1	1	1	1	1	1	1	1	1	1	1	1	1	6.7	6.7	6.7	19.474	179	179;240	0	3.5366	By MS/MS	By MS/MS	By MS/MS
H0Y512;Q9HDC9	H0Y512;Q9HDC9	1;1	1;1	1;1	Adipocyte plasma membrane-associated protein	APMAP	tr|H0Y512|H0Y512_HUMAN Adipocyte plasma membrane-associated protein (Fragment) OS=Homo sapiens GN=APMAP PE=1 SV=1;sp|Q9HDC9|APMAP_HUMAN Adipocyte plasma membrane-associated protein OS=Homo sapiens GN=APMAP PE=1 SV=2	2	1	1	1	0	0	0	0	0	0	0	1	0	0	0	0	0	0	0	0	1	0	0	0	0	0	0	0	0	1	0	2.7	2.7	2.7	45.294	409	409;416	0.0043592	2.6044
H3BR27;H0Y6E7;H3BT71;Q96E39;P38159;H3BNC1;O75526;Q8N7X1	H3BR27;H0Y6E7;H3BT71;Q96E39;P38159;H3BNC1;O75526;Q8N7X1	2;2;2;2;2;1;1;1	2;2;2;2;2;1;1;1	2;2;2;2;2;1;1;1	RNA binding motif protein, X-linked-like-1;RNA-binding motif protein, X chromosome;RNA-binding motif protein, X chromosome, N-terminally processed;RNA-binding motif protein, X-linked-like-2;RNA-binding motif protein, X-linked-like-3	RBMX;RBMXL1;RBMXL2;RBMXL3	tr|H3BR27|H3BR27_HUMAN RNA-binding motif protein, X chromosome OS=Homo sapiens GN=RBMX PE=1 SV=1;tr|H0Y6E7|H0Y6E7_HUMAN RNA-binding motif protein, X chromosome (Fragment) OS=Homo sapiens GN=RBMX PE=1 SV=2;tr|H3BT71|H3BT71_HUMAN RNA-binding motif protein, X	8	2	2	2	1	1	2	1	0	1	1	2	1	1	1	2	1	0	1	1	2	1	1	1	2	1	0	1	1	2	1	34.6	34.6	34.6	8.6098	78	78;292;296;390;391;37;392;1067	0	6.3485	By MS/MS	By MS/MS	By MS/MS
H0Y6I0;Q13439;C9JHJ5	H0Y6I0;Q13439;C9JHJ5	4;4;3	4;4;3	4;4;3	Golgin subfamily A member 4	GOLGA4	tr|H0Y6I0|H0Y6I0_HUMAN Golgin subfamily A member 4 (Fragment) OS=Homo sapiens GN=GOLGA4 PE=1 SV=1;sp|Q13439|GOGA4_HUMAN Golgin subfamily A member 4 OS=Homo sapiens GN=GOLGA4 PE=1 SV=1;tr|C9JHJ5|C9JHJ5_HUMAN Golgin subfamily A member 4 (Fragment) OS=Homo sa	3	4	4	4	3	2	2	3	3	3	4	3	1	3	2	2	3	3	3	4	3	1	3	2	2	3	3	3	4	3	1	2	2	2	246.6	2099	2099;2230;585	0	10.649	By matching	By matching	By MS/MS
H0Y7A7;P62158;F8WBR5;M0QZ52;G3V479;E7ETZ0;E7EMB3;P27482;G3V226;G3V361;Q96HY3;C9J7T9;P02585	H0Y7A7;P62158;F8WBR5;M0QZ52;G3V479;E7ETZ0;E7EMB3	7;7;6;6;6;6;6;2;1;1;1;1;1	7;7;6;6;6;6;6;2;1;1;1;1;1	7;7;6;6;6;6;6;2;1;1;1;1;1	Calmodulin	CALM2;CALM1;CALM3	tr|H0Y7A7|H0Y7A7_HUMAN Calmodulin (Fragment) OS=Homo sapiens GN=CALM2 PE=1 SV=1;sp|P62158|CALM_HUMAN Calmodulin OS=Homo sapiens GN=CALM1 PE=1 SV=2;tr|F8WBR5|F8WBR5_HUMAN Calmodulin OS=Homo sapiens GN=CALM2 PE=1 SV=1;tr|M0QZ52|M0QZ52_HUMAN Calmodulin OS=Hom	13	7	7	7	7	7	6	7	7	7	6	7	7	7	7	6	7	7	7	6	7	7	7	7	6	7	7	7	6	7	7	25.7	25.7	25.7	20.762	187	187;149;65;83;83;150;196;149;76;98;113;145;160	0	30.74	By MS/MS	By MS/MS	By MS/MS
H0Y8C6;O00410;H0Y3V4	H0Y8C6;O00410	6;6;1	6;6;1	6;6;1	Importin-5	IPO5	tr|H0Y8C6|H0Y8C6_HUMAN Importin-5 (Fragment) OS=Homo sapiens GN=IPO5 PE=1 SV=1;sp|O00410|IPO5_HUMAN Importin-5 OS=Homo sapiens GN=IPO5 PE=1 SV=4	3	6	6	6	3	3	2	4	2	3	3	6	2	3	3	2	4	2	3	3	6	2	3	3	2	4	2	3	3	6	2	7.6	7.6	7.6	123.75	1099	1099;1097;182	0	17.498	By MS/MS	By MS/MS	By MS/MS
H0Y8E6;P49736	H0Y8E6;P49736	7;7	7;7	7;7	DNA replication licensing factor MCM2	MCM2	tr|H0Y8E6|H0Y8E6_HUMAN DNA helicase (Fragment) OS=Homo sapiens GN=MCM2 PE=1 SV=1;sp|P49736|MCM2_HUMAN DNA replication licensing factor MCM2 OS=Homo sapiens GN=MCM2 PE=1 SV=4	2	7	7	7	2	2	5	6	2	4	1	5	1	2	2	5	6	2	4	1	5	1	2	2	5	6	2	4	1	5	1	10.2	10.2	10.2	93.998	836	836;904	0	19.147	By MS/MS	By MS/MS	By MS/MS
H0YA96;H0Y8G5;Q14103;D6RAF8;D6RF44;D6RBQ9;D6RD83	H0YA96;H0Y8G5;Q14103;D6RAF8;D6RF44;D6RBQ9	7;7;7;6;5;4;3	7;7;7;6;5;4;3	6;6;6;5;4;3;3	Heterogeneous nuclear ribonucleoprotein D0	HNRNPD	tr|H0YA96|H0YA96_HUMAN Heterogeneous nuclear ribonucleoprotein D0 (Fragment) OS=Homo sapiens GN=HNRNPD PE=1 SV=1;tr|H0Y8G5|H0Y8G5_HUMAN Heterogeneous nuclear ribonucleoprotein D0 (Fragment) OS=Homo sapiens GN=HNRNPD PE=1 SV=7;sp|Q14103|HNRPD_HUMAN Heteroge	7	7	7	6	6	6	7	6	6	6	6	7	5	6	6	7	6	6	6	6	7	5	5	5	6	5	5	5	5	6	4	37.1	37.1	33.3	23.811	210	210;261;355;221;112;155;92	0	22.409	By MS/MS	By MS/MS	By MS/MS
H0Y9X1;Q96EY4;D6RA57;D6RE67;D6RC31	H0Y9X1;Q96EY4;D6RA57;D6RE67;D6RC31	4;4;3;2;2	4;4;3;2;2	4;4;3;2;2	Translation machinery-associated protein 16	TMA16	tr|H0Y9X1|H0Y9X1_HUMAN Translation machinery-associated protein 16 (Fragment) OS=Homo sapiens GN=TMA16 PE=1 SV=1;sp|Q96EY4|TMA16_HUMAN Translation machinery-associated protein 16 OS=Homo sapiens GN=TMA16 PE=1 SV=2;tr|D6RA57|D6RA57_HUMAN Translation machine	5	4	4	4	3	1	4	3	3	2	3	2	2	3	1	4	3	3	2	3	2	2	3	1	4	3	3	2	3	2	2	17.4	17.4	17.4	27.571	242	242;203;144;88;101	0	15.696	By matching	By matching	By MS/MS
H0YC79;H0YC11	H0YC79;H0YC11	1;1	1;1	1;1		MGAT4B	tr|H0YC79|H0YC79_HUMAN Alpha-1,3-mannosyl-glycoprotein 4-beta-N-acetylglucosaminyltransferase B (Fragment) OS=Homo sapiens GN=MGAT4B PE=1 SV=1;tr|H0YC11|H0YC11_HUMAN Alpha-1,3-mannosyl-glycoprotein 4-beta-N-acetylglucosaminyltransferase B (Fragment) OS=Hom	2	1	1	1	0	0	0	0	0	1	0	0	0	0	0	0	0	0	1	0	0	0	0	0	0	0	0	1	0	0	0	3.9	3.9	3.9	33.283	307	307;429	0.0035057	2.6263
H0YDU8;P53041;A8MU39	H0YDU8;P53041	7;7;3	7;7;3	7;7;3	Serine/threonine-protein phosphatase;Serine/threonine-protein phosphatase 5	PPP5C	tr|H0YDU8|H0YDU8_HUMAN Serine/threonine-protein phosphatase (Fragment) OS=Homo sapiens GN=PPP5C PE=1 SV=1;sp|P53041|PPP5_HUMAN Serine/threonine-protein phosphatase 5 OS=Homo sapiens GN=PPP5C PE=1 SV=1	3	7	7	7	5	5	5	5	6	6	5	6	6	5	5	5	5	6	6	5	6	6	5	5	5	5	6	6	5	6	6	17.9	17.9	17.9	55.096	485	485;499;371	0	16.952	By MS/MS	By MS/MS	By MS/MS
H0YHG0;P82979;F8VZQ9	H0YHG0;P82979;F8VZQ9	4;4;3	4;4;3	4;4;3	SAP domain-containing ribonucleoprotein	SARNP	tr|H0YHG0|H0YHG0_HUMAN Uncharacterized protein (Fragment) OS=Homo sapiens PE=1 SV=1;sp|P82979|SARNP_HUMAN SAP domain-containing ribonucleoprotein OS=Homo sapiens GN=SARNP PE=1 SV=3;tr|F8VZQ9|F8VZQ9_HUMAN SAP domain-containing ribonucleoprotein OS=Homo sapi	3	4	4	4	2	1	4	4	1	1	1	4	2	2	1	4	4	1	1	1	4	2	2	1	4	4	1	1	1	4	2	9.2	9.2	9.2	59.075	523	523;210;213	0	7.5218	By MS/MS	By matching	By MS/MS
H0YIB4;Q13242	H0YIB4;Q13242	2;2	2;2	2;2	Serine/arginine-rich splicing factor 9	SRSF9	tr|H0YIB4|H0YIB4_HUMAN Serine/arginine-rich-splicing factor 9 (Fragment) OS=Homo sapiens GN=SRSF9 PE=1 SV=7;sp|Q13242|SRSF9_HUMAN Serine/arginine-rich splicing factor 9 OS=Homo sapiens GN=SRSF9 PE=1 SV=1	2	2	2	2	2	1	2	2	2	2	1	2	2	2	1	2	2	2	2	1	2	2	2	1	2	2	2	2	1	2	2	20	20	20	12.727	110	110;221	0	4.9345	By MS/MS	By matching	By matching
H0YK42;Q13596	H0YK42;Q13596	6;6	4;4	4;4	Sorting nexin-1	SNX1	tr|H0YK42|H0YK42_HUMAN Sorting nexin-1 OS=Homo sapiens GN=SNX1 PE=1 SV=1;sp|Q13596|SNX1_HUMAN Sorting nexin-1 OS=Homo sapiens GN=SNX1 PE=1 SV=3	2	6	4	4	4	5	5	4	5	5	5	5	6	2	3	3	2	3	3	3	3	4	2	3	3	2	3	3	3	3	4	26	19.1	19.1	35.592	304	304;522	0	8.1495	By matching	By MS/MS	By MS/MS
H0YKD8;P46779;H0YMF4;H0YLP6	H0YKD8;P46779;H0YMF4;H0YLP6	9;9;7;6	9;9;7;6	9;9;7;6	60S ribosomal protein L28	RPL28	tr|H0YKD8|H0YKD8_HUMAN 60S ribosomal protein L28 OS=Homo sapiens GN=RPL28 PE=1 SV=1;sp|P46779|RL28_HUMAN 60S ribosomal protein L28 OS=Homo sapiens GN=RPL28 PE=1 SV=3;tr|H0YMF4|H0YMF4_HUMAN 60S ribosomal protein L28 OS=Homo sapiens GN=RPL28 PE=1 SV=1;tr|H0Y	4	9	9	9	9	9	8	9	9	8	8	9	8	9	9	8	9	9	8	8	9	8	9	9	8	9	9	8	8	9	8	41.2	41.2	41.2	19.072	170	170;137;112;89	0	26.606	By MS/MS	By MS/MS	By MS/MS
H0YL52;P09493;H0YKP3;H0YKZ6;A0A087WTJ7	H0YL52;P09493;H0YKP3	8;8;6;1;1	1;1;1;1;1	1;1;1;1;1	Tropomyosin alpha-1 chain	TPM1	tr|H0YL52|H0YL52_HUMAN Tropomyosin alpha-1 chain (Fragment) OS=Homo sapiens GN=TPM1 PE=1 SV=1;sp|P09493|TPM1_HUMAN Tropomyosin alpha-1 chain OS=Homo sapiens GN=TPM1 PE=1 SV=2;tr|H0YKP3|H0YKP3_HUMAN Tropomyosin alpha-1 chain OS=Homo sapiens GN=TPM1 PE=1 SV=	5	8	1	1	6	6	7	7	8	7	7	8	8	1	0	1	1	1	1	1	1	1	1	0	1	1	1	1	1	1	1	27.5	4.2	4.2	30.38	265	265;284;157;70;106	0	3.9736	By MS/MS	By matching	By MS/MS
H0YMA1;H0YMZ1;H0YL69;P25789;H0YKS0;H0YLC2;H0YKT8;H0YMI6;H0YN18;H0YMV3;H0YLS6	H0YMA1;H0YMZ1;H0YL69;P25789;H0YKS0;H0YLC2;H0YKT8;H0YMI6;H0YN18	3;3;3;3;2;2;2;2;2;1;1	3;3;3;3;2;2;2;2;2;1;1	3;3;3;3;2;2;2;2;2;1;1	Proteasome subunit alpha type;Proteasome subunit alpha type-4;Proteasome subunit beta type	PSMA4	tr|H0YMA1|H0YMA1_HUMAN Proteasome subunit alpha type (Fragment) OS=Homo sapiens GN=PSMA4 PE=1 SV=1;tr|H0YMZ1|H0YMZ1_HUMAN Proteasome subunit alpha type (Fragment) OS=Homo sapiens GN=PSMA4 PE=1 SV=7;tr|H0YL69|H0YL69_HUMAN Proteasome subunit alpha type (Frag	11	3	3	3	0	2	1	1	1	0	2	1	0	0	2	1	1	1	0	2	1	0	0	2	1	1	1	0	2	1	0	18.7	18.7	18.7	23.27	209	209;221;236;261;122;174;182;183;230;86;125	0	3.7072		By MS/MS	By matching
H0YLA2;P37108	H0YLA2;P37108	1;1	1;1	1;1	Signal recognition particle 14 kDa protein	SRP14	tr|H0YLA2|H0YLA2_HUMAN Signal recognition particle 14 kDa protein OS=Homo sapiens GN=SRP14 PE=1 SV=1;sp|P37108|SRP14_HUMAN Signal recognition particle 14 kDa protein OS=Homo sapiens GN=SRP14 PE=1 SV=2	2	1	1	1	1	0	1	1	0	0	1	1	1	1	0	1	1	0	0	1	1	1	1	0	1	1	0	0	1	1	1	11.3	11.3	11.3	13.058	115	115;136	0	4.2972	By matching		By MS/MS
H0YLR3;H0YMA0;P09661	H0YLR3;H0YMA0;P09661	2;2;2	2;2;2	2;2;2	U2 small nuclear ribonucleoprotein A	SNRPA1	tr|H0YLR3|H0YLR3_HUMAN U2 small nuclear ribonucleoprotein A (Fragment) OS=Homo sapiens GN=SNRPA1 PE=1 SV=1;tr|H0YMA0|H0YMA0_HUMAN U2 small nuclear ribonucleoprotein A (Fragment) OS=Homo sapiens GN=SNRPA1 PE=1 SV=1;sp|P09661|RU2A_HUMAN U2 small nuclear ri	3	2	2	2	1	1	1	1	1	0	2	2	1	1	1	1	1	1	0	2	2	1	1	1	1	1	1	0	2	2	1	28.1	28.1	28.1	9.4775	89	89;142;255	0	4.1803	By MS/MS	By MS/MS	By matching
H0YN26;P39687;O95626;O43423	H0YN26;P39687	5;5;2;2	3;3;2;2	3;3;2;2	Acidic leucine-rich nuclear phosphoprotein 32 family member A	ANP32A	tr|H0YN26|H0YN26_HUMAN Acidic leucine-rich nuclear phosphoprotein 32 family member A OS=Homo sapiens GN=ANP32A PE=1 SV=1;sp|P39687|AN32A_HUMAN Acidic leucine-rich nuclear phosphoprotein 32 family member A OS=Homo sapiens GN=ANP32A PE=1 SV=1	4	5	3	3	3	3	3	5	4	5	4	4	5	1	1	1	3	2	3	2	2	3	1	1	1	3	2	3	2	2	3	28.2	11.9	11.9	19.997	177	177;249;131;234	0	6.9992	By MS/MS	By MS/MS	By MS/MS
H3BLV9;Q5R363;Q96SB4;H7C2I2;D6RBF8;H7C521;H7C5L6;A8MPP7;A8MPY5;E7ETV6;Q9UPE1;P78362	H3BLV9;Q5R363;Q96SB4	3;3;3;1;1;1;1;1;1;1;1;1	3;3;3;1;1;1;1;1;1;1;1;1	3;3;3;1;1;1;1;1;1;1;1;1	SRSF protein kinase 1	SRPK1	tr|H3BLV9|H3BLV9_HUMAN SRSF protein kinase 1 (Fragment) OS=Homo sapiens GN=SRPK1 PE=1 SV=1;tr|Q5R363|Q5R363_HUMAN SRSF protein kinase 1 OS=Homo sapiens GN=SRPK1 PE=1 SV=2;sp|Q96SB4|SRPK1_HUMAN SRSF protein kinase 1 OS=Homo sapiens GN=SRPK1 PE=1 SV=2	12	3	3	3	2	3	3	2	3	3	3	3	3	2	3	3	2	3	3	3	3	3	2	3	3	2	3	3	3	3	3	5.4	5.4	5.4	76.039	671	671;826;655;129;146;204;295;492;534;634;567;688	0	8.3377	By matching	By matching	By MS/MS
H3BLZ8;Q92841;A0A0U1RQJ0	H3BLZ8;Q92841	13;13;2	12;12;2	9;9;1	Probable ATP-dependent RNA helicase DDX17	DDX17	tr|H3BLZ8|H3BLZ8_HUMAN Probable ATP-dependent RNA helicase DDX17 OS=Homo sapiens GN=DDX17 PE=1 SV=1;sp|Q92841|DDX17_HUMAN Probable ATP-dependent RNA helicase DDX17 OS=Homo sapiens GN=DDX17 PE=1 SV=2	3	13	12	9	8	6	11	11	8	4	9	13	8	7	5	10	10	7	3	8	12	7	4	2	7	7	4	1	5	9	4	22.4	20.9	16.1	80.439	731	731;729;56	0	31.897	By MS/MS	By MS/MS	By MS/MS
H3BMH2;H3BSC1;P62491;Q15907;B4DQU5	H3BMH2;H3BSC1;P62491;Q15907	5;5;5;5;2	5;5;5;5;2	5;5;5;5;2	Ras-related protein Rab-11A;Ras-related protein Rab-11B	RAB11A;RAB11B	tr|H3BMH2|H3BMH2_HUMAN Ras-related protein Rab-11A (Fragment) OS=Homo sapiens GN=RAB11A PE=4 SV=1;tr|H3BSC1|H3BSC1_HUMAN Ras-related protein Rab-11A OS=Homo sapiens GN=RAB11A PE=1 SV=1;sp|P62491|RB11A_HUMAN Ras-related protein Rab-11A OS=Homo sapiens GN=RA	5	5	5	5	4	4	4	5	4	5	4	4	3	4	4	4	5	4	5	4	4	3	4	4	4	5	4	5	4	4	3	33.5	33.5	33.5	17.668	155	155;198;216;218;146	0	12.561	By MS/MS	By MS/MS	By MS/MS
H3BV80;H3BMM9;H3BTC0;Q15287;H3BPG5;H3BMS0	H3BV80;H3BMM9;H3BTC0;Q15287;H3BPG5;H3BMS0	7;7;7;7;6;4	7;7;7;7;6;4	7;7;7;7;6;4	RNA-binding protein with serine-rich domain 1	RNPS1	tr|H3BV80|H3BV80_HUMAN RNA-binding protein with serine-rich domain 1 OS=Homo sapiens GN=RNPS1 PE=1 SV=2;tr|H3BMM9|H3BMM9_HUMAN RNA-binding protein with serine-rich domain 1 (Fragment) OS=Homo sapiens GN=RNPS1 PE=1 SV=1;tr|H3BTC0|H3BTC0_HUMAN RNA-binding pr	6	7	7	7	7	7	7	7	7	7	7	7	7	7	7	7	7	7	7	7	7	7	7	7	7	7	7	7	7	7	7	37	37	37	24.561	211	211;284;302;305;128;257	0	151.95	By MS/MS	By MS/MS	By MS/MS
H3BMQ1;H3BPF6;Q99471	H3BMQ1;H3BPF6;Q99471	1;1;1	1;1;1	1;1;1	Prefoldin subunit 5	PFDN5	tr|H3BMQ1|H3BMQ1_HUMAN Prefoldin subunit 5 OS=Homo sapiens GN=PFDN5 PE=1 SV=1;tr|H3BPF6|H3BPF6_HUMAN Prefoldin subunit 5 (Fragment) OS=Homo sapiens GN=PFDN5 PE=1 SV=1;sp|Q99471|PFD5_HUMAN Prefoldin subunit 5 OS=Homo sapiens GN=PFDN5 PE=1 SV=2	3	1	1	1	1	1	1	1	1	1	1	1	1	1	1	1	1	1	1	1	1	1	1	1	1	1	1	1	1	1	1	17.9	17.9	17.9	9.5351	84	84;152;154	0.00092081	3.0358	By matching	By MS/MS	By MS/MS
H3BMZ1;H3BRL8;H3BPZ1;H3BS72;Q9P035	H3BMZ1;H3BRL8;H3BPZ1;H3BS72;Q9P035	1;1;1;1;1	1;1;1;1;1	1;1;1;1;1	Very-long-chain (3R)-3-hydroxyacyl-CoA dehydratase 3	HACD3	tr|H3BMZ1|H3BMZ1_HUMAN Very-long-chain (3R)-3-hydroxyacyl-CoA dehydratase 3 (Fragment) OS=Homo sapiens GN=HACD3 PE=1 SV=1;tr|H3BRL8|H3BRL8_HUMAN Very-long-chain (3R)-3-hydroxyacyl-CoA dehydratase 3 OS=Homo sapiens GN=HACD3 PE=1 SV=1;tr|H3BPZ1|H3BPZ1_HUMAN	5	1	1	1	1	1	1	1	1	1	1	1	1	1	1	1	1	1	1	1	1	1	1	1	1	1	1	1	1	1	1	10.1	10.1	10.1	16.164	139	139;245;337;400;362	0	4.0837	By MS/MS	By MS/MS	By MS/MS
H3BPG0;H3BN72;H3BNV9;P13073;Q86WV2	H3BPG0;H3BN72;H3BNV9;P13073;Q86WV2	3;3;3;3;2	3;3;3;3;2	3;3;3;3;2	Cytochrome c oxidase subunit 4 isoform 1, mitochondrial	COX4I1	tr|H3BPG0|H3BPG0_HUMAN Cytochrome c oxidase subunit 4 isoform 1, mitochondrial (Fragment) OS=Homo sapiens GN=COX4I1 PE=1 SV=1;tr|H3BN72|H3BN72_HUMAN Cytochrome c oxidase subunit 4 isoform 1, mitochondrial OS=Homo sapiens GN=COX4I1 PE=1 SV=1;tr|H3BNV9|H3BNV	5	3	3	3	3	2	3	3	2	2	3	3	2	3	2	3	3	2	2	3	3	2	3	2	3	3	2	2	3	3	2	27.8	27.8	27.8	12.649	108	108;126;139;169;83	0	8.7538	By MS/MS	By MS/MS	By MS/MS
H3BPE1;H3BQK9;H0Y390;Q9UPN3;E9PNZ4;H0YD69;E9PLY5	H3BPE1;H3BQK9;H0Y390;Q9UPN3	15;15;13;13;3;2;1	15;15;13;13;3;2;1	15;15;13;13;3;2;1	Microtubule-actin cross-linking factor 1, isoforms 1/2/3/5	MACF1	tr|H3BPE1|H3BPE1_HUMAN Microtubule-actin cross-linking factor 1, isoforms 1/2/3/5 OS=Homo sapiens GN=MACF1 PE=1 SV=1;tr|H3BQK9|H3BQK9_HUMAN Microtubule-actin cross-linking factor 1, isoforms 1/2/3/5 OS=Homo sapiens GN=MACF1 PE=1 SV=1;tr|H0Y390|H0Y390_HUMAN	7	15	15	15	3	2	5	6	8	9	4	6	1	3	2	5	6	8	9	4	6	1	3	2	5	6	8	9	4	6	1	2.6	2.6	2.6	856.87	7555	7555;7592;4434;7388;2028;362;1375	0	31.067	By matching	By matching	By MS/MS
H3BPE7;P35637;A0A075B7D9;Q92804	H3BPE7;P35637;A0A075B7D9;Q92804	3;3;2;2	3;3;2;2	3;3;2;2	RNA-binding protein FUS;TATA-binding protein-associated factor 2N	FUS;TAF15	tr|H3BPE7|H3BPE7_HUMAN RNA-binding protein FUS OS=Homo sapiens GN=FUS PE=1 SV=1;sp|P35637|FUS_HUMAN RNA-binding protein FUS OS=Homo sapiens GN=FUS PE=1 SV=1;tr|A0A075B7D9|A0A075B7D9_HUMAN TATA-binding protein-associated factor 2N OS=Homo sapiens GN=TAF15 P	4	3	3	3	2	2	3	2	2	3	3	3	2	2	2	3	2	2	3	3	3	2	2	2	3	2	2	3	3	3	2	8.9	8.9	8.9	53.496	527	527;526;449;592	0	11.313	By MS/MS	By matching	By MS/MS
H3BPZ0;Q6PCT2;H7C112;H3BME1;H3BVB1;H3BQP6;H3BPI8	H3BPZ0;Q6PCT2;H7C112;H3BME1	9;9;8;7;3;1;1	9;9;8;7;3;1;1	9;9;8;7;3;1;1	F-box/LRR-repeat protein 19	FBXL19	tr|H3BPZ0|H3BPZ0_HUMAN F-box/LRR-repeat protein 19 OS=Homo sapiens GN=FBXL19 PE=1 SV=1;sp|Q6PCT2|FXL19_HUMAN F-box/LRR-repeat protein 19 OS=Homo sapiens GN=FBXL19 PE=1 SV=3;tr|H7C112|H7C112_HUMAN F-box/LRR-repeat protein 19 (Fragment) OS=Homo sapiens GN=FB	7	9	9	9	4	6	7	7	6	8	3	7	6	4	6	7	7	6	8	3	7	6	4	6	7	7	6	8	3	7	6	18.2	18.2	18.2	73.77	674	674;694;586;558;382;59;138	0	33.815	By MS/MS	By MS/MS	By MS/MS
H3BQZ9;P07741;H3BSW3;H3BQF1;H3BQB1	H3BQZ9;P07741;H3BSW3;H3BQF1;H3BQB1	5;5;3;3;3	5;5;3;3;3	5;5;3;3;3	Adenine phosphoribosyltransferase	APRT	tr|H3BQZ9|H3BQZ9_HUMAN Adenine phosphoribosyltransferase OS=Homo sapiens GN=APRT PE=1 SV=1;sp|P07741|APT_HUMAN Adenine phosphoribosyltransferase OS=Homo sapiens GN=APRT PE=1 SV=2;tr|H3BSW3|H3BSW3_HUMAN Adenine phosphoribosyltransferase OS=Homo sapiens GN=A	5	5	5	5	3	4	4	3	3	5	3	4	3	3	4	4	3	3	5	3	4	3	3	4	4	3	3	5	3	4	3	40.5	40.5	40.5	16.616	153	153;180;63;149;162	0	14.534	By matching	By MS/MS	By MS/MS
H3BRG4;P22695;H3BSJ9	H3BRG4;P22695;H3BSJ9	2;2;1	2;2;1	2;2;1	Cytochrome b-c1 complex subunit 2, mitochondrial	UQCRC2	tr|H3BRG4|H3BRG4_HUMAN Cytochrome b-c1 complex subunit 2, mitochondrial OS=Homo sapiens GN=UQCRC2 PE=1 SV=1;sp|P22695|QCR2_HUMAN Cytochrome b-c1 complex subunit 2, mitochondrial OS=Homo sapiens GN=UQCRC2 PE=1 SV=3;tr|H3BSJ9|H3BSJ9_HUMAN Cytochrome b-c1 com	3	2	2	2	1	1	2	1	1	1	1	2	1	1	1	2	1	1	1	1	2	1	1	1	2	1	1	1	1	2	1	7.3	7.3	7.3	44.634	412	412;453;336	0	5.9148	By matching	By matching	By MS/MS
H7BYH4;P00441	H7BYH4;P00441	3;3	3;3	3;3	Superoxide dismutase [Cu-Zn]	SOD1	tr|H7BYH4|H7BYH4_HUMAN Superoxide dismutase [Cu-Zn] OS=Homo sapiens GN=SOD1 PE=1 SV=1;sp|P00441|SODC_HUMAN Superoxide dismutase [Cu-Zn] OS=Homo sapiens GN=SOD1 PE=1 SV=2	2	3	3	3	0	1	2	1	3	0	1	1	1	0	1	2	1	3	0	1	1	1	0	1	2	1	3	0	1	1	1	40.7	40.7	40.7	13.909	135	135;154	0	8.1853		By MS/MS	By MS/MS
H7BZ94;P07237;I3L0S0;I3NI03;I3L3U6;H0Y3Z3	H7BZ94;P07237;I3L0S0;I3NI03;I3L3U6;H0Y3Z3	2;2;1;1;1;1	2;2;1;1;1;1	2;2;1;1;1;1	Protein disulfide-isomerase	P4HB	tr|H7BZ94|H7BZ94_HUMAN Protein disulfide-isomerase OS=Homo sapiens GN=P4HB PE=1 SV=2;sp|P07237|PDIA1_HUMAN Protein disulfide-isomerase OS=Homo sapiens GN=P4HB PE=1 SV=3;tr|I3L0S0|I3L0S0_HUMAN Protein disulfide-isomerase (Fragment) OS=Homo sapiens GN=P4HB P	6	2	2	2	1	1	2	1	0	0	0	2	2	1	1	2	1	0	0	0	2	2	1	1	2	1	0	0	0	2	2	6	6	6	52.502	464	464;508;148;166;188;274	0	6.508	By MS/MS	By MS/MS	By MS/MS
H7BZJ3	H7BZJ3	2	1	1		PDIA3	tr|H7BZJ3|H7BZJ3_HUMAN Protein disulfide-isomerase A3 (Fragment) OS=Homo sapiens GN=PDIA3 PE=1 SV=1	1	2	1	1	2	1	2	2	2	1	1	2	2	1	0	1	1	1	1	0	1	1	1	0	1	1	1	1	0	1	1	19.5	11.4	11.4	13.519	123	123	0	4.5468	By matching	By matching	By MS/MS
H7C1M2;H7C2G8;H7C1S4;H7C257	H7C1M2	26;11;1;1	1;0;0;0	1;0;0;0		SON	tr|H7C1M2|H7C1M2_HUMAN Protein SON (Fragment) OS=Homo sapiens GN=SON PE=1 SV=1	4	26	1	1	22	25	25	24	19	26	17	23	22	1	1	1	1	1	1	1	1	1	1	1	1	1	1	1	1	1	1	28	0.7	0.7	159.91	1454	1454;343;92;97	0	3.5696	By MS/MS	By MS/MS	By MS/MS
H7C1V0;P07339;H7C469	H7C1V0;P07339;H7C469	2;2;1	2;2;1	2;2;1	Cathepsin D;Cathepsin D light chain;Cathepsin D heavy chain	CTSD	tr|H7C1V0|H7C1V0_HUMAN Cathepsin D (Fragment) OS=Homo sapiens GN=CTSD PE=1 SV=1;sp|P07339|CATD_HUMAN Cathepsin D OS=Homo sapiens GN=CTSD PE=1 SV=1;tr|H7C469|H7C469_HUMAN Uncharacterized protein (Fragment) OS=Homo sapiens PE=1 SV=6	3	2	2	2	1	2	2	2	2	1	1	1	0	1	2	2	2	2	1	1	1	0	1	2	2	2	2	1	1	1	0	9	9	9	20.371	189	189;412;262	0.0034996	2.6194	By matching	By MS/MS	By matching
H7C2Q8;Q99848	H7C2Q8;Q99848	3;3	3;3	3;3	Probable rRNA-processing protein EBP2	EBNA1BP2	tr|H7C2Q8|H7C2Q8_HUMAN EBNA1 binding protein 2, isoform CRA_d OS=Homo sapiens GN=EBNA1BP2 PE=1 SV=1;sp|Q99848|EBP2_HUMAN Probable rRNA-processing protein EBP2 OS=Homo sapiens GN=EBNA1BP2 PE=1 SV=2	2	3	3	3	1	1	2	3	2	1	1	2	2	1	1	2	3	2	1	1	2	2	1	1	2	3	2	1	1	2	2	6.9	6.9	6.9	40.684	361	361;306	0	5.7564	By matching	By matching	By matching
H7C3P9;Q9UNS2	H7C3P9;Q9UNS2	1;1	1;1	1;1	COP9 signalosome complex subunit 3	COPS3	tr|H7C3P9|H7C3P9_HUMAN COP9 signalosome complex subunit 3 OS=Homo sapiens GN=COPS3 PE=1 SV=2;sp|Q9UNS2|CSN3_HUMAN COP9 signalosome complex subunit 3 OS=Homo sapiens GN=COPS3 PE=1 SV=3	2	1	1	1	0	0	1	1	1	0	0	1	0	0	0	1	1	1	0	0	1	0	0	0	1	1	1	0	0	1	0	4.3	4.3	4.3	39.036	345	345;423	0	3.3649			By MS/MS
H7C4H2;Q9Y5M8	H7C4H2;Q9Y5M8	3;3	3;3	3;3	Signal recognition particle receptor subunit beta	SRPRB	tr|H7C4H2|H7C4H2_HUMAN Signal recognition particle receptor subunit beta (Fragment) OS=Homo sapiens GN=SRPRB PE=1 SV=1;sp|Q9Y5M8|SRPRB_HUMAN Signal recognition particle receptor subunit beta OS=Homo sapiens GN=SRPRB PE=1 SV=3	2	3	3	3	2	3	3	3	2	2	1	3	1	2	3	3	3	2	2	1	3	1	2	3	3	3	2	2	1	3	1	25	25	25	17.502	160	160;271	0	9.9301	By MS/MS	By MS/MS	By MS/MS
H7C517;Q5TCS8	H7C517;Q5TCS8	1;1	1;1	1;1	Adenylate kinase 9	AK9	tr|H7C517|H7C517_HUMAN Adenylate kinase 9 (Fragment) OS=Homo sapiens GN=AK9 PE=1 SV=1;sp|Q5TCS8|KAD9_HUMAN Adenylate kinase 9 OS=Homo sapiens GN=AK9 PE=1 SV=2	2	1	1	1	1	1	1	1	1	1	1	1	1	1	1	1	1	1	1	1	1	1	1	1	1	1	1	1	1	1	1	1.1	1.1	1.1	87.225	749	749;1911	0.0026978	2.8282	By MS/MS	By MS/MS	By MS/MS
I3L1L3;Q9BQG0	I3L1L3;Q9BQG0	4;4	4;4	4;4	Myb-binding protein 1A	MYBBP1A	tr|I3L1L3|I3L1L3_HUMAN Myb-binding protein 1A (Fragment) OS=Homo sapiens GN=MYBBP1A PE=1 SV=1;sp|Q9BQG0|MBB1A_HUMAN Myb-binding protein 1A OS=Homo sapiens GN=MYBBP1A PE=1 SV=2	2	4	4	4	1	3	3	1	2	1	1	4	2	1	3	3	1	2	1	1	4	2	1	3	3	1	2	1	1	4	2	3.6	3.6	3.6	140.13	1252	1252;1328	0	9.4636	By matching	By MS/MS	By MS/MS
I3L1P8;Q02978	I3L1P8;Q02978	1;1	1;1	1;1	Mitochondrial 2-oxoglutarate/malate carrier protein	SLC25A11	tr|I3L1P8|I3L1P8_HUMAN Mitochondrial 2-oxoglutarate/malate carrier protein (Fragment) OS=Homo sapiens GN=SLC25A11 PE=1 SV=1;sp|Q02978|M2OM_HUMAN Mitochondrial 2-oxoglutarate/malate carrier protein OS=Homo sapiens GN=SLC25A11 PE=1 SV=3	2	1	1	1	1	1	1	1	1	1	1	1	1	1	1	1	1	1	1	1	1	1	1	1	1	1	1	1	1	1	1	5.4	5.4	5.4	32.182	296	296;314	0	9.9266	By MS/MS	By MS/MS	By MS/MS
I3L397;I3L504;P63241;Q6IS14;F8WCJ1;C9J7B5;C9J4W5;Q9GZV4	I3L397;I3L504;P63241;Q6IS14;F8WCJ1;C9J7B5;C9J4W5;Q9GZV4	11;11;11;7;6;6;6;6	11;11;11;7;6;6;6;6	11;11;11;7;6;6;6;6	Eukaryotic translation initiation factor 5A;Eukaryotic translation initiation factor 5A-1;Eukaryotic translation initiation factor 5A-1-like;Eukaryotic translation initiation factor 5A-2	EIF5A;EIF5AL1;EIF5A2	tr|I3L397|I3L397_HUMAN Eukaryotic translation initiation factor 5A (Fragment) OS=Homo sapiens GN=EIF5A PE=1 SV=7;tr|I3L504|I3L504_HUMAN Eukaryotic translation initiation factor 5A-1 OS=Homo sapiens GN=EIF5A PE=1 SV=1;sp|P63241|IF5A1_HUMAN Eukaryotic transl	8	11	11	11	10	9	11	9	9	10	9	9	9	10	9	11	9	9	10	9	9	9	10	9	11	9	9	10	9	9	9	59.2	59.2	59.2	16.118	147	147;186;154;154;105;109;115;153	0	78.98	By MS/MS	By MS/MS	By MS/MS
I3L4J1;Q9UN37;O75351;Q6PIW4	I3L4J1;Q9UN37;O75351;Q6PIW4	1;1;1;1	1;1;1;1	1;1;1;1	Vacuolar protein sorting-associated protein 4A;Vacuolar protein sorting-associated protein 4B;Fidgetin-like protein 1	VPS4A;VPS4B;FIGNL1	tr|I3L4J1|I3L4J1_HUMAN Uncharacterized protein (Fragment) OS=Homo sapiens PE=1 SV=3;sp|Q9UN37|VPS4A_HUMAN Vacuolar protein sorting-associated protein 4A OS=Homo sapiens GN=VPS4A PE=1 SV=1;sp|O75351|VPS4B_HUMAN Vacuolar protein sorting-associated protein 4B	4	1	1	1	0	0	1	0	1	0	0	0	1	0	0	1	0	1	0	0	0	1	0	0	1	0	1	0	0	0	1	2.8	2.8	2.8	48.07	428	428;437;444;674	0	3.6673			By MS/MS
J3KN16;Q5VYK3;R4GMY1	J3KN16;Q5VYK3;R4GMY1	4;4;2	4;4;2	4;4;2	Proteasome-associated protein ECM29 homolog	KIAA0368;ECM29	tr|J3KN16|J3KN16_HUMAN Proteasome-associated protein ECM29 homolog OS=Homo sapiens GN=KIAA0368 PE=1 SV=1;sp|Q5VYK3|ECM29_HUMAN Proteasome-associated protein ECM29 homolog OS=Homo sapiens GN=ECM29 PE=1 SV=2;tr|R4GMY1|R4GMY1_HUMAN Proteasome-associated prote	3	4	4	4	3	3	3	3	4	3	3	3	2	3	3	3	3	4	3	3	3	2	3	3	3	3	4	3	3	3	2	2.8	2.8	2.8	223.69	2017	2017;1845;890	0	9.5869	By MS/MS	By MS/MS	By MS/MS
J3KN67	J3KN67	20	1	0		TPM3	tr|J3KN67|J3KN67_HUMAN Tropomyosin alpha-3 chain OS=Homo sapiens GN=TPM3 PE=1 SV=1	1	20	1	0	18	18	19	19	19	18	16	18	19	0	1	1	0	1	0	1	0	1	0	0	0	0	0	0	0	0	0	51.6	4.6	0	33.222	285	285	0	6.1777	By matching	By MS/MS	By MS/MS
J3KNE3;P68402	J3KNE3;P68402	1;1	1;1	1;1	Platelet-activating factor acetylhydrolase IB subunit beta	PAFAH1B2	tr|J3KNE3|J3KNE3_HUMAN Platelet-activating factor acetylhydrolase IB subunit beta (Fragment) OS=Homo sapiens GN=PAFAH1B2 PE=1 SV=1;sp|P68402|PA1B2_HUMAN Platelet-activating factor acetylhydrolase IB subunit beta OS=Homo sapiens GN=PAFAH1B2 PE=1 SV=1	2	1	1	1	1	1	1	1	1	1	1	1	1	1	1	1	1	1	1	1	1	1	1	1	1	1	1	1	1	1	1	5.1	5.1	5.1	18.357	175	175;229	0.0043253	2.5514	By MS/MS	By MS/MS	By MS/MS
J3KNZ9;Q9HAH7;H3BRE6	J3KNZ9;Q9HAH7	4;2;1	4;2;1	4;2;1	Probable fibrosin-1	FBRS	tr|J3KNZ9|J3KNZ9_HUMAN Probable fibrosin-1 OS=Homo sapiens GN=FBRS PE=1 SV=1;sp|Q9HAH7|FBRS_HUMAN Probable fibrosin-1 OS=Homo sapiens GN=FBRS PE=1 SV=3	3	4	4	4	2	1	4	3	3	2	0	3	3	2	1	4	3	3	2	0	3	3	2	1	4	3	3	2	0	3	3	5.7	5.7	5.7	103.77	980	980;460;210	0	9.4577	By matching	By MS/MS	By MS/MS
J3KP15;Q01130;J3QL05	J3KP15;Q01130;J3QL05	9;9;8	9;9;8	7;7;6	Serine/arginine-rich splicing factor 2	SRSF2	tr|J3KP15|J3KP15_HUMAN Serine/arginine-rich-splicing factor 2 (Fragment) OS=Homo sapiens GN=SRSF2 PE=1 SV=7;sp|Q01130|SRSF2_HUMAN Serine/arginine-rich splicing factor 2 OS=Homo sapiens GN=SRSF2 PE=1 SV=4;tr|J3QL05|J3QL05_HUMAN Serine/arginine-rich-splicing	3	9	9	7	9	9	9	9	9	8	9	9	9	9	9	9	9	9	8	9	9	9	7	7	7	7	7	6	7	7	7	56	56	44.8	15.527	134	134;221;130	0	76.242	By MS/MS	By MS/MS	By MS/MS
J3KPP4;O95232;D6RDI2;C9JL41;H0YA81;H7C5U7;E7EN55;H0YBV7;H0YAR4;D6RHH0;U3KQT3	J3KPP4;O95232	19;19;8;4;3;2;2;2;2;1;1	19;19;8;4;3;2;2;2;2;1;1	19;19;8;4;3;2;2;2;2;1;1	Luc7-like protein 3	LUC7L3	tr|J3KPP4|J3KPP4_HUMAN Cisplatin resistance-associated overexpressed protein, isoform CRA_b OS=Homo sapiens GN=LUC7L3 PE=1 SV=1;sp|O95232|LC7L3_HUMAN Luc7-like protein 3 OS=Homo sapiens GN=LUC7L3 PE=1 SV=2	11	19	19	19	18	18	18	19	17	18	17	17	16	18	18	18	19	17	18	17	17	16	18	18	18	19	17	18	17	17	16	37.6	37.6	37.6	58.22	489	489;432;184;79;207;39;54;118;123;36;47	0	166.71	By MS/MS	By MS/MS	By MS/MS
J3KQ32;Q9NTK5;C9JTK6;C9JCJ9	J3KQ32;Q9NTK5	8;8;2;1	8;8;2;1	8;8;2;1	Obg-like ATPase 1	OLA1	tr|J3KQ32|J3KQ32_HUMAN Obg-like ATPase 1 OS=Homo sapiens GN=OLA1 PE=1 SV=1;sp|Q9NTK5|OLA1_HUMAN Obg-like ATPase 1 OS=Homo sapiens GN=OLA1 PE=1 SV=2	4	8	8	8	5	3	6	6	6	5	6	6	5	5	3	6	6	6	5	6	6	5	5	3	6	6	6	5	6	6	5	21.4	21.4	21.4	46.937	416	416;396;116;103	0	23.26	By MS/MS	By MS/MS	By MS/MS
J3KRE2;J3KTF8;J3QQX2;P52565;J3KS60;J3KRY1	J3KRE2;J3KTF8;J3QQX2;P52565;J3KS60;J3KRY1	5;5;5;5;3;3	5;5;5;5;3;3	5;5;5;5;3;3	Rho GDP-dissociation inhibitor 1	ARHGDIA	tr|J3KRE2|J3KRE2_HUMAN Rho GDP-dissociation inhibitor 1 OS=Homo sapiens GN=ARHGDIA PE=1 SV=1;tr|J3KTF8|J3KTF8_HUMAN Rho GDP-dissociation inhibitor 1 (Fragment) OS=Homo sapiens GN=ARHGDIA PE=1 SV=7;tr|J3QQX2|J3QQX2_HUMAN Rho GDP-dissociation inhibitor 1 OS=	6	5	5	5	5	5	5	5	5	5	5	5	4	5	5	5	5	5	5	5	5	4	5	5	5	5	5	5	5	5	4	33.3	33.3	33.3	14.814	129	129;194;235;204;92;249	0	29.911	By MS/MS	By MS/MS	By MS/MS
J3KRG2;Q96QA5	J3KRG2;Q96QA5	2;2	2;2	2;2	Gasdermin-A	GSDMA	tr|J3KRG2|J3KRG2_HUMAN Gasdermin-A (Fragment) OS=Homo sapiens GN=GSDMA PE=1 SV=7;sp|Q96QA5|GSDMA_HUMAN Gasdermin-A OS=Homo sapiens GN=GSDMA PE=1 SV=4	2	2	2	2	1	1	2	1	1	2	2	2	1	1	1	2	1	1	2	2	2	1	1	1	2	1	1	2	2	2	1	13.8	13.8	13.8	17.892	159	159;445	0.0018132	2.9491	By matching	By matching	By matching
J3QRR3;J3QLH6;J3KRP2;J3QSA9;J3QQM1;P62195;J3QRW1;Q8NB90	J3QRR3;J3QLH6;J3KRP2;J3QSA9;J3QQM1;P62195;J3QRW1;Q8NB90	2;2;2;2;2;2;1;1	2;2;2;2;2;2;1;1	2;2;2;2;2;2;1;1	26S protease regulatory subunit 8;Spermatogenesis-associated protein 5	PSMC5;SPATA5	tr|J3QRR3|J3QRR3_HUMAN 26S protease regulatory subunit 8 (Fragment) OS=Homo sapiens GN=PSMC5 PE=1 SV=1;tr|J3QLH6|J3QLH6_HUMAN 26S protease regulatory subunit 8 (Fragment) OS=Homo sapiens GN=PSMC5 PE=1 SV=1;tr|J3KRP2|J3KRP2_HUMAN 26S protease regulatory sub	8	2	2	2	0	1	1	2	2	2	1	2	1	0	1	1	2	2	2	1	2	1	0	1	1	2	2	2	1	2	1	16.5	16.5	16.5	13.671	127	127;215;241;257;263;406;143;893	0	3.0562		By matching	By MS/MS
J3KRR0;J3QQM5;Q9BT23	J3KRR0;J3QQM5;Q9BT23	1;1;1	1;1;1	1;1;1	LIM domain-containing protein 2	LIMD2	tr|J3KRR0|J3KRR0_HUMAN LIM domain containing 2, isoform CRA_b OS=Homo sapiens GN=LIMD2 PE=1 SV=1;tr|J3QQM5|J3QQM5_HUMAN LIM domain-containing protein 2 (Fragment) OS=Homo sapiens GN=LIMD2 PE=1 SV=1;sp|Q9BT23|LIMD2_HUMAN LIM domain-containing protein 2 OS=H	3	1	1	1	1	1	1	1	1	1	1	1	1	1	1	1	1	1	1	1	1	1	1	1	1	1	1	1	1	1	1	19.5	19.5	19.5	9.5175	87	87;109;127	0	4.9067	By MS/MS	By MS/MS	By MS/MS
J3KS31;J3QRS9;X6R4W8;O43670	J3KS31;J3QRS9;X6R4W8;O43670	1;1;1;1	1;1;1;1	1;1;1;1	BUB3-interacting and GLEBS motif-containing protein ZNF207	ZNF207	tr|J3KS31|J3KS31_HUMAN BUB3-interacting and GLEBS motif-containing protein ZNF207 (Fragment) OS=Homo sapiens GN=ZNF207 PE=1 SV=1;tr|J3QRS9|J3QRS9_HUMAN BUB3-interacting and GLEBS motif-containing protein ZNF207 OS=Homo sapiens GN=ZNF207 PE=1 SV=1;tr|X6R4W8	4	1	1	1	1	0	1	1	0	1	1	1	1	1	0	1	1	0	1	1	1	1	1	0	1	1	0	1	1	1	1	3.5	3.5	3.5	34.987	341	341;493;497;478	0.0018149	2.9498	By MS/MS		By MS/MS
J3KSI8;J3QQS1;J3QLS3;Q9Y2R9;J3QKW2	J3KSI8;J3QQS1;J3QLS3;Q9Y2R9;J3QKW2	2;2;2;2;1	2;2;2;2;1	2;2;2;2;1	28S ribosomal protein S7, mitochondrial	MRPS7	tr|J3KSI8|J3KSI8_HUMAN 28S ribosomal protein S7, mitochondrial (Fragment) OS=Homo sapiens GN=MRPS7 PE=1 SV=1;tr|J3QQS1|J3QQS1_HUMAN 28S ribosomal protein S7, mitochondrial (Fragment) OS=Homo sapiens GN=MRPS7 PE=1 SV=1;tr|J3QLS3|J3QLS3_HUMAN 28S ribosomal p	5	2	2	2	1	1	1	0	0	0	0	1	1	1	1	1	0	0	0	0	1	1	1	1	1	0	0	0	0	1	1	15.4	15.4	15.4	18.274	156	156;172;271;242;183	0	3.6016	By matching	By matching	By MS/MS
J3KTA4;P17844;J3KRZ1;J3QSF1;J3QRQ7;J3QR02;J3KRX8;X6RLV5	J3KTA4;P17844	12;12;5;4;4;2;2;1	8;8;2;3;2;2;2;1	8;8;2;3;2;2;2;1	Probable ATP-dependent RNA helicase DDX5	DDX5	tr|J3KTA4|J3KTA4_HUMAN Probable ATP-dependent RNA helicase DDX5 OS=Homo sapiens GN=DDX5 PE=1 SV=1;sp|P17844|DDX5_HUMAN Probable ATP-dependent RNA helicase DDX5 OS=Homo sapiens GN=DDX5 PE=1 SV=1	8	12	8	8	9	8	12	7	7	8	9	12	10	5	4	8	3	3	5	5	8	6	5	4	8	3	3	5	5	8	6	19.7	12.2	12.2	69.086	614	614;614;166;153;212;99;120;96	0	19.726	By MS/MS	By MS/MS	By MS/MS
J3KTD2;Q86VV8	J3KTD2;Q86VV8	1;1	1;1	1;1	Rotatin	RTTN	tr|J3KTD2|J3KTD2_HUMAN Rotatin OS=Homo sapiens GN=RTTN PE=1 SV=1;sp|Q86VV8|RTTN_HUMAN Rotatin OS=Homo sapiens GN=RTTN PE=1 SV=3	2	1	1	1	1	1	1	1	1	1	1	1	1	1	1	1	1	1	1	1	1	1	1	1	1	1	1	1	1	1	1	1.4	1.4	1.4	56.318	500	500;2226	0.0035398	2.6904	By MS/MS	By MS/MS	By MS/MS
J3QR09;J3KTE4;P84098;J3QL15	J3QR09;J3KTE4;P84098	5;5;5;2	5;5;5;2	5;5;5;2	Ribosomal protein L19;60S ribosomal protein L19	RPL19	tr|J3QR09|J3QR09_HUMAN Ribosomal protein L19 OS=Homo sapiens GN=RPL19 PE=1 SV=1;tr|J3KTE4|J3KTE4_HUMAN Ribosomal protein L19 OS=Homo sapiens GN=RPL19 PE=1 SV=1;sp|P84098|RL19_HUMAN 60S ribosomal protein L19 OS=Homo sapiens GN=RPL19 PE=1 SV=1	4	5	5	5	5	5	5	5	5	5	5	5	5	5	5	5	5	5	5	5	5	5	5	5	5	5	5	5	5	5	5	25.9	25.9	25.9	23.134	193	193;194;196;128	0	26.781	By MS/MS	By MS/MS	By MS/MS
J3KTL2;Q07955;J3KSR8;J3QQV5;J3KSW7	J3KTL2;Q07955	13;13;6;5;5	13;13;6;5;5	13;13;6;5;5	Serine/arginine-rich splicing factor 1	SRSF1	tr|J3KTL2|J3KTL2_HUMAN Serine/arginine-rich-splicing factor 1 OS=Homo sapiens GN=SRSF1 PE=1 SV=1;sp|Q07955|SRSF1_HUMAN Serine/arginine-rich splicing factor 1 OS=Homo sapiens GN=SRSF1 PE=1 SV=2	5	13	13	13	12	12	12	12	13	12	11	12	13	12	12	12	12	13	12	11	12	13	12	12	12	12	13	12	11	12	13	43.9	43.9	43.9	28.329	253	253;248;143;65;73	0	56.631	By MS/MS	By MS/MS	By MS/MS
J3QK89;Q8IWX8	J3QK89;Q8IWX8	19;19	19;19	19;19	Calcium homeostasis endoplasmic reticulum protein	CHERP	tr|J3QK89|J3QK89_HUMAN Calcium homeostasis endoplasmic reticulum protein OS=Homo sapiens GN=CHERP PE=1 SV=1;sp|Q8IWX8|CHERP_HUMAN Calcium homeostasis endoplasmic reticulum protein OS=Homo sapiens GN=CHERP PE=1 SV=3	2	19	19	19	19	17	17	18	19	17	13	18	19	19	17	17	18	19	17	13	18	19	19	17	17	18	19	17	13	18	19	27.7	27.7	27.7	104.93	927	927;916	0	91.698	By MS/MS	By MS/MS	By MS/MS
J3QQ67;Q07020;G3V203;H0YHA7;F8VYV2;F8VUA6;A0A075B7A0;F8VXR6	J3QQ67;Q07020;G3V203;H0YHA7;F8VYV2;F8VUA6;A0A075B7A0	8;8;7;7;6;5;5;1	8;8;7;7;6;5;5;1	8;8;7;7;6;5;5;1	60S ribosomal protein L18	RPL18	tr|J3QQ67|J3QQ67_HUMAN 60S ribosomal protein L18 (Fragment) OS=Homo sapiens GN=RPL18 PE=1 SV=1;sp|Q07020|RL18_HUMAN 60S ribosomal protein L18 OS=Homo sapiens GN=RPL18 PE=1 SV=2;tr|G3V203|G3V203_HUMAN 60S ribosomal protein L18 OS=Homo sapiens GN=RPL18 PE=1	8	8	8	8	7	7	7	7	7	7	7	8	7	7	7	7	7	7	7	7	8	7	7	7	7	7	7	7	7	8	7	42.1	42.1	42.1	21.728	190	190;188;164;167;133;130;138;84	0	55.044	By MS/MS	By MS/MS	By MS/MS
J3QRS3;P19105;O14950;P24844;J3KTJ1	J3QRS3;P19105;O14950;P24844	3;3;3;2;1	3;3;3;2;1	3;3;3;2;1	Myosin regulatory light chain 12A;Myosin regulatory light chain 12B;Myosin regulatory light polypeptide 9	MYL12A;MYL12B;MYL9	tr|J3QRS3|J3QRS3_HUMAN Myosin regulatory light chain 12A OS=Homo sapiens GN=MYL12A PE=1 SV=1;sp|P19105|ML12A_HUMAN Myosin regulatory light chain 12A OS=Homo sapiens GN=MYL12A PE=1 SV=2;sp|O14950|ML12B_HUMAN Myosin regulatory light chain 12B OS=Homo sapiens	5	3	3	3	2	2	2	1	2	1	1	3	2	2	2	2	1	2	1	1	3	2	2	2	2	1	2	1	1	3	2	16.9	16.9	16.9	20.457	177	177;171;172;172;114	0	8.1203	By MS/MS	By MS/MS	By MS/MS
J3QRY4;O00231	J3QRY4;O00231	2;2	2;2	2;2	26S proteasome non-ATPase regulatory subunit 11	PSMD11	tr|J3QRY4|J3QRY4_HUMAN 26S proteasome non-ATPase regulatory subunit 11 (Fragment) OS=Homo sapiens GN=PSMD11 PE=1 SV=7;sp|O00231|PSD11_HUMAN 26S proteasome non-ATPase regulatory subunit 11 OS=Homo sapiens GN=PSMD11 PE=1 SV=3	2	2	2	2	1	1	1	1	1	1	1	2	0	1	1	1	1	1	1	1	2	0	1	1	1	1	1	1	1	2	0	13.3	13.3	13.3	21.18	188	188;422	0	4.0949	By matching	By matching	By matching
J3QSV6;O76021;I3L234;I3L3C4;I3L3U9	J3QSV6;O76021;I3L234;I3L3C4;I3L3U9	2;2;1;1;1	2;2;1;1;1	2;2;1;1;1	Ribosomal L1 domain-containing protein 1	RSL1D1	tr|J3QSV6|J3QSV6_HUMAN Ribosomal L1 domain-containing protein 1 (Fragment) OS=Homo sapiens GN=RSL1D1 PE=1 SV=1;sp|O76021|RL1D1_HUMAN Ribosomal L1 domain-containing protein 1 OS=Homo sapiens GN=RSL1D1 PE=1 SV=3;tr|I3L234|I3L234_HUMAN Ribosomal L1 domain-con	5	2	2	2	1	1	1	1	1	2	1	1	1	1	1	1	1	1	2	1	1	1	1	1	1	1	1	2	1	1	1	5.6	5.6	5.6	48.208	430	430;490;98;158;296	0	4.8241	By matching	By matching	By matching
J3QT28;O43684;J3QSX4	J3QT28;O43684;J3QSX4	3;3;2	3;3;2	3;3;2	Mitotic checkpoint protein BUB3	BUB3	tr|J3QT28|J3QT28_HUMAN Mitotic checkpoint protein BUB3 (Fragment) OS=Homo sapiens GN=BUB3 PE=1 SV=1;sp|O43684|BUB3_HUMAN Mitotic checkpoint protein BUB3 OS=Homo sapiens GN=BUB3 PE=1 SV=1;tr|J3QSX4|J3QSX4_HUMAN Mitotic checkpoint protein BUB3 OS=Homo sapien	3	3	3	3	0	0	3	2	0	0	0	2	0	0	0	3	2	0	0	0	2	0	0	0	3	2	0	0	0	2	0	11.9	11.9	11.9	31.703	278	278;328;145	0	5.9771			By MS/MS
J9JID7;Q03252	J9JID7;Q03252	2;2	2;2	2;2	Lamin-B2	LMNB2	tr|J9JID7|J9JID7_HUMAN Lamin B2, isoform CRA_a OS=Homo sapiens GN=LMNB2 PE=1 SV=1;sp|Q03252|LMNB2_HUMAN Lamin-B2 OS=Homo sapiens GN=LMNB2 PE=1 SV=4	2	2	2	2	1	1	2	2	1	1	0	1	2	1	1	2	2	1	1	0	1	2	1	1	2	2	1	1	0	1	2	3.1	3.1	3.1	69.948	620	620;620	0	4.5549	By matching	By matching	By MS/MS
K4DI93;Q13620	K4DI93;Q13620	2;2	2;2	2;2	Cullin-4B	CUL4B	tr|K4DI93|K4DI93_HUMAN Cullin 4B, isoform CRA_e OS=Homo sapiens GN=CUL4B PE=1 SV=1;sp|Q13620|CUL4B_HUMAN Cullin-4B OS=Homo sapiens GN=CUL4B PE=1 SV=4	2	2	2	2	0	0	2	1	1	0	0	1	1	0	0	2	1	1	0	0	1	1	0	0	2	1	1	0	0	1	1	2.6	2.6	2.6	102.75	900	900;913	0	3.308			By MS/MS
K7EJT5;K7EP65;K7EKS7;K7ELC4;K7EMH1;K7ERI7;P35268	K7EJT5;K7EP65;K7EKS7;K7ELC4;K7EMH1;K7ERI7;P35268	1;1;1;1;1;1;1	1;1;1;1;1;1;1	1;1;1;1;1;1;1	60S ribosomal protein L22	RPL22	tr|K7EJT5|K7EJT5_HUMAN 60S ribosomal protein L22 (Fragment) OS=Homo sapiens GN=RPL22 PE=1 SV=1;tr|K7EP65|K7EP65_HUMAN 60S ribosomal protein L22 (Fragment) OS=Homo sapiens GN=RPL22 PE=1 SV=1;tr|K7EKS7|K7EKS7_HUMAN 60S ribosomal protein L22 OS=Homo sapiens G	7	1	1	1	1	1	1	1	1	1	1	1	1	1	1	1	1	1	1	1	1	1	1	1	1	1	1	1	1	1	1	27.7	27.7	27.7	5.0827	47	47;48;53;79;89;95;128	0	6.1983	By MS/MS	By MS/MS	By MS/MS
K7EL20;O75821;K7ER90;K7ENA8;K7EP16;K7ENH0;K7EL60	K7EL20;O75821;K7ER90;K7ENA8	6;6;5;4;2;1;1	6;6;5;4;2;1;1	6;6;5;4;2;1;1	Eukaryotic translation initiation factor 3 subunit G	EIF3G	tr|K7EL20|K7EL20_HUMAN Eukaryotic translation initiation factor 3 subunit G (Fragment) OS=Homo sapiens GN=EIF3G PE=1 SV=7;sp|O75821|EIF3G_HUMAN Eukaryotic translation initiation factor 3 subunit G OS=Homo sapiens GN=EIF3G PE=1 SV=2;tr|K7ER90|K7ER90_HUMAN E	7	6	6	6	5	5	6	6	6	5	5	6	6	5	5	6	6	6	5	5	6	6	5	5	6	6	6	5	5	6	6	25.5	25.5	25.5	29.38	263	263;320;227;289;118;52;149	0	27.656	By MS/MS	By MS/MS	By MS/MS
K7ELL7;P14314;A0A0C4DGP4	K7ELL7;P14314;A0A0C4DGP4	2;2;1	2;2;1	2;2;1	Glucosidase 2 subunit beta	PRKCSH	tr|K7ELL7|K7ELL7_HUMAN Glucosidase 2 subunit beta OS=Homo sapiens GN=PRKCSH PE=1 SV=1;sp|P14314|GLU2B_HUMAN Glucosidase 2 subunit beta OS=Homo sapiens GN=PRKCSH PE=1 SV=2;tr|A0A0C4DGP4|A0A0C4DGP4_HUMAN Glucosidase 2 subunit beta (Fragment) OS=Homo sapiens	3	2	2	2	0	0	2	0	0	0	1	1	0	0	0	2	0	0	0	1	1	0	0	0	2	0	0	0	1	1	0	4.7	4.7	4.7	60.192	535	535;528;200	0	6.16			By MS/MS
K7EM11;O14908;Q8TF64	K7EM11;O14908;Q8TF64	2;2;1	2;2;1	2;2;1	PDZ domain-containing protein GIPC1;PDZ domain-containing protein GIPC3	GIPC1;GIPC3	tr|K7EM11|K7EM11_HUMAN PDZ domain-containing protein GIPC1 (Fragment) OS=Homo sapiens GN=GIPC1 PE=1 SV=1;sp|O14908|GIPC1_HUMAN PDZ domain-containing protein GIPC1 OS=Homo sapiens GN=GIPC1 PE=1 SV=2;sp|Q8TF64|GIPC3_HUMAN PDZ domain-containing protein GIPC3	3	2	2	2	1	0	1	1	2	1	1	2	1	1	0	1	1	2	1	1	2	1	1	0	1	1	2	1	1	2	1	21.1	21.1	21.1	13.988	128	128;333;312	0	3.8241	By matching		By matching
K7EM18;P41567;O60739	K7EM18;P41567;O60739	2;2;2	2;2;2	2;2;2	Eukaryotic translation initiation factor 1;Eukaryotic translation initiation factor 1b	EIF1;EIF1B	tr|K7EM18|K7EM18_HUMAN Eukaryotic translation initiation factor 1 OS=Homo sapiens GN=EIF1 PE=1 SV=1;sp|P41567|EIF1_HUMAN Eukaryotic translation initiation factor 1 OS=Homo sapiens GN=EIF1 PE=1 SV=1;sp|O60739|EIF1B_HUMAN Eukaryotic translation initiation fa	3	2	2	2	2	2	2	2	2	2	2	2	2	2	2	2	2	2	2	2	2	2	2	2	2	2	2	2	2	2	2	24.8	24.8	24.8	13.607	121	121;113;113	0	10.523	By MS/MS	By MS/MS	By MS/MS
K7ENH2;K9J957;P61289;K7EMD0;K7EPX6;K7EKR3;B7Z8D3;A0A087WTV2;B3KQ25;K7ESG5	K7ENH2;K9J957;P61289;K7EMD0;K7EPX6;K7EKR3;B7Z8D3;A0A087WTV2;B3KQ25;K7ESG5	2;2;2;1;1;1;1;1;1;1	2;2;2;1;1;1;1;1;1;1	2;2;2;1;1;1;1;1;1;1	Proteasome activator complex subunit 3	PSME3	tr|K7ENH2|K7ENH2_HUMAN Proteasome activator complex subunit 3 (Fragment) OS=Homo sapiens GN=PSME3 PE=1 SV=1;tr|K9J957|K9J957_HUMAN Proteasome activator complex subunit 3 OS=Homo sapiens GN=PSME3 PE=1 SV=1;sp|P61289|PSME3_HUMAN Proteasome activator complex	10	2	2	2	2	1	2	1	0	0	1	2	0	2	1	2	1	0	0	1	2	0	2	1	2	1	0	0	1	2	0	11.2	11.2	11.2	20.593	179	179;231;254;96;111;119;130;170;193;198	0	3.1296	By MS/MS	By matching	By MS/MS
K7EQJ5;P62841;K7EM56;A0A0B4J2B4;K7EJ78;S4R417;K7ELC2;S4R456	K7EQJ5;P62841;K7EM56;A0A0B4J2B4;K7EJ78;S4R417;K7ELC2	3;3;2;2;2;2;2;1	3;3;2;2;2;2;2;1	3;3;2;2;2;2;2;1	40S ribosomal protein S15	RPS15	tr|K7EQJ5|K7EQJ5_HUMAN 40S ribosomal protein S15 OS=Homo sapiens GN=RPS15 PE=1 SV=2;sp|P62841|RS15_HUMAN 40S ribosomal protein S15 OS=Homo sapiens GN=RPS15 PE=1 SV=2;tr|K7EM56|K7EM56_HUMAN 40S ribosomal protein S15 OS=Homo sapiens GN=RPS15 PE=1 SV=2;tr|A0A	8	3	3	3	3	3	3	3	3	3	3	3	3	3	3	3	3	3	3	3	3	3	3	3	3	3	3	3	3	3	3	20.6	20.6	20.6	16.57	141	141;145;112;118;129;135;152;68	0	5.3968	By MS/MS	By MS/MS	By MS/MS
K7EQW8	K7EQW8	2	1	1		TPM4	tr|K7EQW8|K7EQW8_HUMAN Tropomyosin alpha-4 chain (Fragment) OS=Homo sapiens GN=TPM4 PE=1 SV=1	1	2	1	1	2	2	2	2	2	2	2	2	2	1	1	1	1	1	1	1	1	1	1	1	1	1	1	1	1	1	1	49.2	27.1	27.1	6.8126	59	59	0	4.0097	By MS/MS	By matching	By matching
K7ER58;Q6P6C2	K7ER58;Q6P6C2	1;1	1;1	1;1	RNA demethylase ALKBH5	ALKBH5	tr|K7ER58|K7ER58_HUMAN RNA demethylase ALKBH5 OS=Homo sapiens GN=ALKBH5 PE=1 SV=1;sp|Q6P6C2|ALKB5_HUMAN RNA demethylase ALKBH5 OS=Homo sapiens GN=ALKBH5 PE=1 SV=2	2	1	1	1	1	1	1	1	1	1	0	1	1	1	1	1	1	1	1	0	1	1	1	1	1	1	1	1	0	1	1	32.1	32.1	32.1	6.2999	53	53;394	0.0094664	2.4591	By matching	By matching	By MS/MS
K7ESE8;Q13867;J3KSD8;K7ES02	K7ESE8;Q13867;J3KSD8;K7ES02	3;3;2;2	3;3;2;2	3;3;2;2	Bleomycin hydrolase	BLMH	tr|K7ESE8|K7ESE8_HUMAN Bleomycin hydrolase (Fragment) OS=Homo sapiens GN=BLMH PE=1 SV=1;sp|Q13867|BLMH_HUMAN Bleomycin hydrolase OS=Homo sapiens GN=BLMH PE=1 SV=1;tr|J3KSD8|J3KSD8_HUMAN Bleomycin hydrolase (Fragment) OS=Homo sapiens GN=BLMH PE=1 SV=7;tr|K7	4	3	3	3	2	3	3	1	2	3	3	2	1	2	3	3	1	2	3	3	2	1	2	3	3	1	2	3	3	2	1	13.4	13.4	13.4	26.738	231	231;455;263;318	0	5.2116	By matching	By MS/MS	By MS/MS
K7ESJ4;O14737;Q3HM38;X6R2P6;K7EQA1	K7ESJ4;O14737;Q3HM38;X6R2P6;K7EQA1	2;2;1;1;1	2;2;1;1;1	2;2;1;1;1	Programmed cell death protein 5	PDCD5	tr|K7ESJ4|K7ESJ4_HUMAN Programmed cell death protein 5 OS=Homo sapiens GN=PDCD5 PE=1 SV=1;sp|O14737|PDCD5_HUMAN Programmed cell death protein 5 OS=Homo sapiens GN=PDCD5 PE=1 SV=3;tr|Q3HM38|Q3HM38_HUMAN Programmed cell death 5 short isoform OS=Homo sapiens	5	2	2	2	2	1	1	2	1	1	1	1	1	2	1	1	2	1	1	1	1	1	2	1	1	2	1	1	1	1	1	40	40	40	7.4683	65	65;125;40;55;87	0	7.3598	By MS/MS	By MS/MS	By MS/MS
M0QXS5;P14866;M0QYT0;M0R076;B4DVF8;M0R1W6	M0QXS5;P14866;M0QYT0	4;4;2;1;1;1	4;4;2;1;1;1	4;4;2;1;1;1	Heterogeneous nuclear ribonucleoprotein L	HNRNPL	tr|M0QXS5|M0QXS5_HUMAN Heterogeneous nuclear ribonucleoprotein L (Fragment) OS=Homo sapiens GN=HNRNPL PE=1 SV=1;sp|P14866|HNRPL_HUMAN Heterogeneous nuclear ribonucleoprotein L OS=Homo sapiens GN=HNRNPL PE=1 SV=2;tr|M0QYT0|M0QYT0_HUMAN Uncharacterized prote	6	4	4	4	0	1	3	1	2	2	1	4	2	0	1	3	1	2	2	1	4	2	0	1	3	1	2	2	1	4	2	14.3	14.3	14.3	58.362	530	530;589;321;114;179;220	0	8.0543		By MS/MS	By MS/MS
M0QY97;Q9UPT8	M0QY97;Q9UPT8	2;2	2;2	2;2	Zinc finger CCCH domain-containing protein 4	ZC3H4	tr|M0QY97|M0QY97_HUMAN Zinc finger CCCH domain-containing protein 4 (Fragment) OS=Homo sapiens GN=ZC3H4 PE=1 SV=1;sp|Q9UPT8|ZC3H4_HUMAN Zinc finger CCCH domain-containing protein 4 OS=Homo sapiens GN=ZC3H4 PE=1 SV=3	2	2	2	2	2	2	1	2	1	1	2	1	2	2	2	1	2	1	1	2	1	2	2	2	1	2	1	1	2	1	2	4.5	4.5	4.5	95.425	910	910;1303	0	3.7414	By MS/MS	By MS/MS	By MS/MS
M0QYE0;M0R0I3;Q99961;Q99962	M0QYE0;M0R0I3;Q99961;Q99962	2;2;2;1	2;2;2;1	2;2;2;1	Endophilin-A2;Endophilin-A1	SH3GL1;SH3GL2	tr|M0QYE0|M0QYE0_HUMAN Endophilin-A2 (Fragment) OS=Homo sapiens GN=SH3GL1 PE=1 SV=7;tr|M0R0I3|M0R0I3_HUMAN Endophilin-A2 (Fragment) OS=Homo sapiens GN=SH3GL1 PE=1 SV=1;sp|Q99961|SH3G1_HUMAN Endophilin-A2 OS=Homo sapiens GN=SH3GL1 PE=1 SV=1;sp|Q99962|SH3G2_	4	2	2	2	1	1	1	1	1	1	1	1	2	1	1	1	1	1	1	1	1	2	1	1	1	1	1	1	1	1	2	24.8	24.8	24.8	14.401	129	129;139;368;352	0	6.2741	By matching	By matching	By matching
M0QYU8;P49862	M0QYU8;P49862	1;1	1;1	1;1	Kallikrein-7	KLK7	tr|M0QYU8|M0QYU8_HUMAN Kallikrein-7 (Fragment) OS=Homo sapiens GN=KLK7 PE=1 SV=1;sp|P49862|KLK7_HUMAN Kallikrein-7 OS=Homo sapiens GN=KLK7 PE=1 SV=1	2	1	1	1	1	1	1	1	1	1	1	1	1	1	1	1	1	1	1	1	1	1	1	1	1	1	1	1	1	1	1	24.6	24.6	24.6	7.7959	69	69;253	0	10.988	By MS/MS	By matching	By MS/MS
M0QZK8;O75223;H7BZK5;B8ZZK2	M0QZK8;O75223;H7BZK5;B8ZZK2	4;4;2;2	4;4;2;2	4;4;2;2	Gamma-glutamylcyclotransferase	GGCT	tr|M0QZK8|M0QZK8_HUMAN Uncharacterized protein OS=Homo sapiens PE=4 SV=1;sp|O75223|GGCT_HUMAN Gamma-glutamylcyclotransferase OS=Homo sapiens GN=GGCT PE=1 SV=1;tr|H7BZK5|H7BZK5_HUMAN Gamma-glutamylcyclotransferase (Fragment) OS=Homo sapiens GN=GGCT PE=1 SV=	4	4	4	4	3	3	3	2	3	3	4	3	1	3	3	3	2	3	3	4	3	1	3	3	3	2	3	3	4	3	1	48.5	48.5	48.5	11.578	103	103;188;119;166	0	12.659	By MS/MS	By MS/MS	By MS/MS
M0R080;P25685;M0R1D6;M0QZD0;M0QYT3;M0QXK0;Q9UDY4	M0R080;P25685;M0R1D6;M0QZD0;M0QYT3;M0QXK0;Q9UDY4	2;2;1;1;1;1;1	2;2;1;1;1;1;1	2;2;1;1;1;1;1	DnaJ homolog subfamily B member 1;DnaJ homolog subfamily B member 4	DNAJB1;DNAJB4	tr|M0R080|M0R080_HUMAN DnaJ homolog subfamily B member 1 (Fragment) OS=Homo sapiens GN=DNAJB1 PE=1 SV=1;sp|P25685|DNJB1_HUMAN DnaJ homolog subfamily B member 1 OS=Homo sapiens GN=DNAJB1 PE=1 SV=4;tr|M0R1D6|M0R1D6_HUMAN DnaJ homolog subfamily B member 1 (Fr	7	2	2	2	2	0	1	1	0	1	1	1	0	2	0	1	1	0	1	1	1	0	2	0	1	1	0	1	1	1	0	12	12	12	20.497	183	183;340;91;107;116;162;337	0	3.7524	By MS/MS		By matching
M0R0F0;M0R0R2;P46782;M0QZN2	M0R0F0;M0R0R2;P46782;M0QZN2	5;5;5;4	5;5;5;4	5;5;5;4	40S ribosomal protein S5;40S ribosomal protein S5, N-terminally processed	RPS5	tr|M0R0F0|M0R0F0_HUMAN 40S ribosomal protein S5 (Fragment) OS=Homo sapiens GN=RPS5 PE=1 SV=1;tr|M0R0R2|M0R0R2_HUMAN 40S ribosomal protein S5 OS=Homo sapiens GN=RPS5 PE=1 SV=1;sp|P46782|RS5_HUMAN 40S ribosomal protein S5 OS=Homo sapiens GN=RPS5 PE=1 SV=4;tr	4	5	5	5	3	3	5	4	4	3	2	4	3	3	3	5	4	4	3	2	4	3	3	3	5	4	4	3	2	4	3	31	31	31	22.391	200	200;225;204;134	0	26.218	By MS/MS	By MS/MS	By MS/MS
M0R117;Q02543;M0R3D6;M0R1A7;M0R0P7	M0R117;Q02543;M0R3D6;M0R1A7;M0R0P7	7;7;6;6;4	7;7;6;6;4	7;7;6;6;4	60S ribosomal protein L18a	RPL18A	tr|M0R117|M0R117_HUMAN 60S ribosomal protein L18a OS=Homo sapiens GN=RPL18A PE=1 SV=1;sp|Q02543|RL18A_HUMAN 60S ribosomal protein L18a OS=Homo sapiens GN=RPL18A PE=1 SV=2;tr|M0R3D6|M0R3D6_HUMAN 60S ribosomal protein L18a (Fragment) OS=Homo sapiens GN=RPL18	5	7	7	7	7	7	7	7	7	7	7	7	4	7	7	7	7	7	7	7	7	4	7	7	7	7	7	7	7	7	4	40.9	40.9	40.9	18.079	154	154;176;141;147;137	0	23.441	By MS/MS	By MS/MS	By MS/MS
M0R3C3;Q9NZ01	M0R3C3;Q9NZ01	1;1	1;1	1;1	Very-long-chain enoyl-CoA reductase	TECR	tr|M0R3C3|M0R3C3_HUMAN Very-long-chain enoyl-CoA reductase OS=Homo sapiens GN=TECR PE=1 SV=1;sp|Q9NZ01|TECR_HUMAN Very-long-chain enoyl-CoA reductase OS=Homo sapiens GN=TECR PE=1 SV=1	2	1	1	1	1	1	0	0	1	1	0	1	1	1	1	0	0	1	1	0	1	1	1	1	0	0	1	1	0	1	1	9.5	9.5	9.5	11.773	105	105;308	0	8.4105	By matching	By matching
O00151	O00151	6	6	6	PDZ and LIM domain protein 1	PDLIM1	sp|O00151|PDLI1_HUMAN PDZ and LIM domain protein 1 OS=Homo sapiens GN=PDLIM1 PE=1 SV=4	1	6	6	6	3	3	5	5	4	5	4	4	5	3	3	5	5	4	5	4	4	5	3	3	5	5	4	5	4	4	5	22.8	22.8	22.8	36.071	329	329	0	16.994	By MS/MS	By MS/MS	By MS/MS
O00203;H0YBD0;Q13367	O00203	18;2;2	18;2;2	18;2;2	AP-3 complex subunit beta-1	AP3B1	sp|O00203|AP3B1_HUMAN AP-3 complex subunit beta-1 OS=Homo sapiens GN=AP3B1 PE=1 SV=3	3	18	18	18	15	15	15	16	17	17	18	15	13	15	15	15	16	17	17	18	15	13	15	15	15	16	17	17	18	15	13	17.9	17.9	17.9	121.32	1094	1094;154;1082	0	73.715	By MS/MS	By MS/MS	By MS/MS
O00222	O00222	1	1	1	Metabotropic glutamate receptor 8	GRM8	sp|O00222|GRM8_HUMAN Metabotropic glutamate receptor 8 OS=Homo sapiens GN=GRM8 PE=2 SV=2	1	1	1	1	1	0	0	1	0	1	0	1	0	1	0	0	1	0	1	0	1	0	1	0	0	1	0	1	0	1	0	1.3	1.3	1.3	101.74	908	908	0.0035273	2.6694	By matching
O00264	O00264	2	2	1	Membrane-associated progesterone receptor component 1	PGRMC1	sp|O00264|PGRC1_HUMAN Membrane-associated progesterone receptor component 1 OS=Homo sapiens GN=PGRMC1 PE=1 SV=3	1	2	2	1	1	0	2	1	0	1	1	1	0	1	0	2	1	0	1	1	1	0	0	0	1	0	0	0	0	0	0	11.8	11.8	7.2	21.671	195	195	0	6.2996	By matching		By MS/MS
O00267;M0QYL9	O00267	4;1	4;1	4;1	Transcription elongation factor SPT5	SUPT5H	sp|O00267|SPT5H_HUMAN Transcription elongation factor SPT5 OS=Homo sapiens GN=SUPT5H PE=1 SV=1	2	4	4	4	2	2	2	2	3	2	0	3	3	2	2	2	2	3	2	0	3	3	2	2	2	2	3	2	0	3	3	4.1	4.1	4.1	121	1087	1087;164	0	8.6575	By MS/MS	By MS/MS	By matching
O00299	O00299	5	5	5	Chloride intracellular channel protein 1	CLIC1	sp|O00299|CLIC1_HUMAN Chloride intracellular channel protein 1 OS=Homo sapiens GN=CLIC1 PE=1 SV=4	1	5	5	5	3	3	4	4	4	4	4	5	2	3	3	4	4	4	4	4	5	2	3	3	4	4	4	4	4	5	2	28.2	28.2	28.2	26.922	241	241	0	15.192	By MS/MS	By MS/MS	By MS/MS
O00459;E9PFP1;V9GYJ4	O00459;E9PFP1	16;8;3	15;8;3	15;8;3	Phosphatidylinositol 3-kinase regulatory subunit beta	PIK3R2	sp|O00459|P85B_HUMAN Phosphatidylinositol 3-kinase regulatory subunit beta OS=Homo sapiens GN=PIK3R2 PE=1 SV=2;tr|E9PFP1|E9PFP1_HUMAN Phosphatidylinositol 3-kinase regulatory subunit beta OS=Homo sapiens GN=PIK3R2 PE=1 SV=1	3	16	15	15	11	9	10	11	13	14	12	15	11	10	8	9	10	12	13	11	14	10	10	8	9	10	12	13	11	14	10	28.4	26.9	26.9	81.544	728	728;481;124	0	43.547	By MS/MS	By MS/MS	By MS/MS
O00499;S4R418;F5H0W4;A0A0A0MT10;A0A087X188;Q9UBW5;P49418	O00499	9;1;1;1;1;1;1	9;1;1;1;1;1;1	9;1;1;1;1;1;1	Myc box-dependent-interacting protein 1	BIN1	sp|O00499|BIN1_HUMAN Myc box-dependent-interacting protein 1 OS=Homo sapiens GN=BIN1 PE=1 SV=1	7	9	9	9	7	6	6	8	6	7	7	8	7	7	6	6	8	6	7	7	8	7	7	6	6	8	6	7	7	8	7	17.4	17.4	17.4	64.699	593	593;536;539;551;597;565;695	0	31.107	By MS/MS	By MS/MS	By MS/MS
O00505;H0Y4S9	O00505;H0Y4S9	2;1	2;1	2;1	Importin subunit alpha-4	KPNA3	sp|O00505|IMA4_HUMAN Importin subunit alpha-4 OS=Homo sapiens GN=KPNA3 PE=1 SV=2;tr|H0Y4S9|H0Y4S9_HUMAN Importin subunit alpha-4 (Fragment) OS=Homo sapiens GN=KPNA3 PE=1 SV=1	2	2	2	2	1	1	1	2	0	1	1	1	2	1	1	1	2	0	1	1	1	2	1	1	1	2	0	1	1	1	2	4.6	4.6	4.6	57.81	521	521;91	0	3.5929	By matching	By matching	By MS/MS
O14617;A0A087WYN6;K7ERW8;K7ELX8	O14617	14;2;1;1	14;2;1;1	14;2;1;1	AP-3 complex subunit delta-1	AP3D1	sp|O14617|AP3D1_HUMAN AP-3 complex subunit delta-1 OS=Homo sapiens GN=AP3D1 PE=1 SV=1	4	14	14	14	11	8	12	11	13	11	6	8	9	11	8	12	11	13	11	6	8	9	11	8	12	11	13	11	6	8	9	14.7	14.7	14.7	130.16	1153	1153;203;155;193	0	47.833	By MS/MS	By MS/MS	By MS/MS
O14646;H0Y8V4;A0A087WVF4;O14647	O14646	15;1;1;1	15;1;1;1	15;1;1;1	Chromodomain-helicase-DNA-binding protein 1	CHD1	sp|O14646|CHD1_HUMAN Chromodomain-helicase-DNA-binding protein 1 OS=Homo sapiens GN=CHD1 PE=1 SV=2	4	15	15	15	10	11	10	13	11	14	7	11	11	10	11	10	13	11	14	7	11	11	10	11	10	13	11	14	7	11	11	12.5	12.5	12.5	196.69	1710	1710;113;272;1828	0	38.826	By MS/MS	By MS/MS	By MS/MS
O14654;H3BTC1	O14654	70;6	70;6	70;6	Insulin receptor substrate 4	IRS4	sp|O14654|IRS4_HUMAN Insulin receptor substrate 4 OS=Homo sapiens GN=IRS4 PE=1 SV=1	2	70	70	70	69	68	69	66	66	67	66	68	65	69	68	69	66	66	67	66	68	65	69	68	69	66	66	67	66	68	65	59.7	59.7	59.7	133.77	1257	1257;37	0	323.31	By MS/MS	By MS/MS	By MS/MS
O14776	O14776	4	4	4	Transcription elongation regulator 1	TCERG1	sp|O14776|TCRG1_HUMAN Transcription elongation regulator 1 OS=Homo sapiens GN=TCERG1 PE=1 SV=2	1	4	4	4	2	3	3	3	4	3	3	3	3	2	3	3	3	4	3	3	3	3	2	3	3	3	4	3	3	3	3	4.5	4.5	4.5	123.9	1098	1098	0	6.9178	By MS/MS	By MS/MS	By MS/MS
O14818;H0Y586;A0A087WYS6;Q8TAA3	O14818	3;1;1;1	3;1;1;1	3;1;1;1	Proteasome subunit alpha type-7	PSMA7	sp|O14818|PSA7_HUMAN Proteasome subunit alpha type-7 OS=Homo sapiens GN=PSMA7 PE=1 SV=1	4	3	3	3	2	3	3	3	2	2	3	3	2	2	3	3	3	2	2	3	3	2	2	3	3	3	2	2	3	3	2	11.7	11.7	11.7	27.887	248	248;187;224;256	0	7.0497	By MS/MS	By MS/MS	By MS/MS
O14828	O14828	2	2	2	Secretory carrier-associated membrane protein 3	SCAMP3	sp|O14828|SCAM3_HUMAN Secretory carrier-associated membrane protein 3 OS=Homo sapiens GN=SCAMP3 PE=1 SV=3	1	2	2	2	2	2	2	2	1	1	1	2	2	2	2	2	2	1	1	1	2	2	2	2	2	2	1	1	1	2	2	8.4	8.4	8.4	38.287	347	347	0	11.436	By MS/MS	By MS/MS	By MS/MS
O14929	O14929	1	1	1	Histone acetyltransferase type B catalytic subunit	HAT1	sp|O14929|HAT1_HUMAN Histone acetyltransferase type B catalytic subunit OS=Homo sapiens GN=HAT1 PE=1 SV=1	1	1	1	1	1	1	1	1	0	0	1	0	1	1	1	1	1	0	0	1	0	1	1	1	1	1	0	0	1	0	1	3.1	3.1	3.1	49.512	419	419	0	3.1124	By matching	By matching	By matching
O15042;H0Y8D9;E7EW00	O15042	39;16;14	39;16;14	2;1;1	U2 snRNP-associated SURP motif-containing protein	U2SURP	sp|O15042|SR140_HUMAN U2 snRNP-associated SURP motif-containing protein OS=Homo sapiens GN=U2SURP PE=1 SV=2	3	39	39	2	37	38	38	38	37	38	36	38	39	37	38	38	38	37	38	36	38	39	1	2	1	2	2	2	2	2	2	44.5	44.5	5.3	118.29	1029	1029;439;425	0	323.31	By MS/MS	By MS/MS	By MS/MS
O15047;C9J2Z9	O15047	28;6	28;6	27;6	Histone-lysine N-methyltransferase SETD1A	SETD1A	sp|O15047|SET1A_HUMAN Histone-lysine N-methyltransferase SETD1A OS=Homo sapiens GN=SETD1A PE=1 SV=3	2	28	28	27	23	23	23	22	26	23	18	25	23	23	23	23	22	26	23	18	25	23	22	22	22	21	25	22	18	24	22	24	24	23.3	186.03	1707	1707;247	0	107.95	By MS/MS	By MS/MS	By MS/MS
O15067	O15067	1	1	1	Phosphoribosylformylglycinamidine synthase	PFAS	sp|O15067|PUR4_HUMAN Phosphoribosylformylglycinamidine synthase OS=Homo sapiens GN=PFAS PE=1 SV=4	1	1	1	1	0	0	1	1	1	1	0	1	1	0	0	1	1	1	1	0	1	1	0	0	1	1	1	1	0	1	1	1.4	1.4	1.4	144.73	1338	1338	0.0035619	2.7388			By MS/MS
Q5T8U5;O15260;B7Z1G8	Q5T8U5;O15260;B7Z1G8	3;3;2	3;3;2	3;3;2	Surfeit locus protein 4	SURF4	tr|Q5T8U5|Q5T8U5_HUMAN Surfeit 4 OS=Homo sapiens GN=SURF4 PE=1 SV=1;sp|O15260|SURF4_HUMAN Surfeit locus protein 4 OS=Homo sapiens GN=SURF4 PE=1 SV=3;tr|B7Z1G8|B7Z1G8_HUMAN Surfeit 4, isoform CRA_b OS=Homo sapiens GN=SURF4 PE=1 SV=1	3	3	3	3	2	2	2	2	1	0	2	2	2	2	2	2	2	1	0	2	2	2	2	2	2	2	1	0	2	2	2	17.2	17.2	17.2	21.127	186	186;269;226	0	5.4368	By matching	By matching	By MS/MS
O15371;B0QYA5;B0QYA4;B0QYA8;B0QYA6	O15371;B0QYA5	4;2;1;1;1	4;2;1;1;1	4;2;1;1;1	Eukaryotic translation initiation factor 3 subunit D	EIF3D	sp|O15371|EIF3D_HUMAN Eukaryotic translation initiation factor 3 subunit D OS=Homo sapiens GN=EIF3D PE=1 SV=1;tr|B0QYA5|B0QYA5_HUMAN Eukaryotic translation initiation factor 3 subunit D (Fragment) OS=Homo sapiens GN=EIF3D PE=1 SV=1	5	4	4	4	1	1	3	1	1	1	1	1	1	1	1	3	1	1	1	1	1	1	1	1	3	1	1	1	1	1	1	7.8	7.8	7.8	63.972	548	548;269;105;123;173	0	12.538	By MS/MS	By MS/MS	By MS/MS
O15446	O15446	2	2	2	DNA-directed RNA polymerase I subunit RPA34	CD3EAP	sp|O15446|RPA34_HUMAN DNA-directed RNA polymerase I subunit RPA34 OS=Homo sapiens GN=CD3EAP PE=1 SV=1	1	2	2	2	2	0	2	2	2	1	1	0	2	2	0	2	2	2	1	1	0	2	2	0	2	2	2	1	1	0	2	8.6	8.6	8.6	54.985	510	510	0	4.6492	By MS/MS		By matching
O15479	O15479	1	1	1	Melanoma-associated antigen B2	MAGEB2	sp|O15479|MAGB2_HUMAN Melanoma-associated antigen B2 OS=Homo sapiens GN=MAGEB2 PE=1 SV=3	1	1	1	1	1	1	1	1	1	1	1	1	1	1	1	1	1	1	1	1	1	1	1	1	1	1	1	1	1	1	1	5	5	5	35.277	319	319	0	10.744	By MS/MS	By MS/MS	By MS/MS
O43143	O43143	4	4	4	Pre-mRNA-splicing factor ATP-dependent RNA helicase DHX15	DHX15	sp|O43143|DHX15_HUMAN Pre-mRNA-splicing factor ATP-dependent RNA helicase DHX15 OS=Homo sapiens GN=DHX15 PE=1 SV=2	1	4	4	4	0	0	2	1	1	1	1	3	1	0	0	2	1	1	1	1	3	1	0	0	2	1	1	1	1	3	1	5.4	5.4	5.4	90.932	795	795	0	9.1242			By MS/MS
O43175;Q5SZU1	O43175;Q5SZU1	9;7	9;7	9;7	D-3-phosphoglycerate dehydrogenase	PHGDH	sp|O43175|SERA_HUMAN D-3-phosphoglycerate dehydrogenase OS=Homo sapiens GN=PHGDH PE=1 SV=4;tr|Q5SZU1|Q5SZU1_HUMAN D-3-phosphoglycerate dehydrogenase OS=Homo sapiens GN=PHGDH PE=1 SV=1	2	9	9	9	8	6	9	7	7	9	7	9	9	8	6	9	7	7	9	7	9	9	8	6	9	7	7	9	7	9	9	21.2	21.2	21.2	56.65	533	533;499	0	37.455	By MS/MS	By MS/MS	By MS/MS
O43242	O43242	4	4	4	26S proteasome non-ATPase regulatory subunit 3	PSMD3	sp|O43242|PSMD3_HUMAN 26S proteasome non-ATPase regulatory subunit 3 OS=Homo sapiens GN=PSMD3 PE=1 SV=2	1	4	4	4	4	1	4	4	3	3	4	4	3	4	1	4	4	3	3	4	4	3	4	1	4	4	3	3	4	4	3	9.9	9.9	9.9	60.977	534	534	0	10.661	By MS/MS	By MS/MS	By MS/MS
O43390;B4DT28	O43390;B4DT28	12;8	7;5	7;5	Heterogeneous nuclear ribonucleoprotein R	HNRNPR	sp|O43390|HNRPR_HUMAN Heterogeneous nuclear ribonucleoprotein R OS=Homo sapiens GN=HNRNPR PE=1 SV=1;tr|B4DT28|B4DT28_HUMAN Heterogeneous nuclear ribonucleoprotein R OS=Homo sapiens GN=HNRNPR PE=1 SV=1	2	12	7	7	7	8	8	11	9	9	6	7	9	3	3	4	6	4	5	1	3	4	3	3	4	6	4	5	1	3	4	21	13.4	13.4	70.942	633	633;494	0	19.706	By MS/MS	By MS/MS	By MS/MS
O43395	O43395	2	2	2	U4/U6 small nuclear ribonucleoprotein Prp3	PRPF3	sp|O43395|PRPF3_HUMAN U4/U6 small nuclear ribonucleoprotein Prp3 OS=Homo sapiens GN=PRPF3 PE=1 SV=2	1	2	2	2	0	0	1	2	1	0	0	2	1	0	0	1	2	1	0	0	2	1	0	0	1	2	1	0	0	2	1	3.4	3.4	3.4	77.528	683	683	0	6.082			By MS/MS
O43491;E9PMV8;Q6ZSX4;E9PPC9	O43491	18;5;3;2	18;5;3;2	0;0;0;0	Band 4.1-like protein 2	EPB41L2	sp|O43491|E41L2_HUMAN Band 4.1-like protein 2 OS=Homo sapiens GN=EPB41L2 PE=1 SV=1	4	18	18	0	10	9	11	13	16	16	18	14	11	10	9	11	13	16	16	18	14	11	0	0	0	0	0	0	0	0	0	21	21	0	112.59	1005	1005;268;201;126	0	57.585	By MS/MS	By MS/MS	By MS/MS
O43707;F5GXS2;H7C144;P35609;H7C5W8;G3V2W4;H0YJW3;F6THM6;Q08043;K7EP19;G3V2X9;K7EJH8;G3V2N5;A0A087WSZ2;D6RH00;G3V2E8;G3V5M4	O43707;F5GXS2	21;11;9;5;4;3;3;3;3;2;2;2;2;2;1;1;1	21;11;9;5;4;3;3;3;3;2;2;2;2;2;1;1;1	12;7;6;0;0;0;0;0;0;1;0;1;0;0;0;0;0	Alpha-actinin-4	ACTN4	sp|O43707|ACTN4_HUMAN Alpha-actinin-4 OS=Homo sapiens GN=ACTN4 PE=1 SV=2;tr|F5GXS2|F5GXS2_HUMAN Alpha-actinin-4 OS=Homo sapiens GN=ACTN4 PE=1 SV=2	17	21	21	12	17	14	17	20	20	19	16	16	19	17	14	17	20	20	19	16	16	19	9	8	9	11	11	10	7	9	10	30.8	30.8	20.2	104.85	911	911;521;342;894;297;238;251;686;901;105;144;182;261;944;72;85;126	0	82.023	By MS/MS	By MS/MS	By MS/MS
O43719;Q5H919;Q5H918	O43719	32;8;8	32;8;8	32;8;8	HIV Tat-specific factor 1	HTATSF1	sp|O43719|HTSF1_HUMAN HIV Tat-specific factor 1 OS=Homo sapiens GN=HTATSF1 PE=1 SV=1	3	32	32	32	21	24	23	28	27	28	21	25	30	21	24	23	28	27	28	21	25	30	21	24	23	28	27	28	21	25	30	45.3	45.3	45.3	85.852	755	755;223;244	0	189.99	By MS/MS	By MS/MS	By MS/MS
O43776	O43776	2	2	2	Asparagine--tRNA ligase, cytoplasmic	NARS	sp|O43776|SYNC_HUMAN Asparagine--tRNA ligase, cytoplasmic OS=Homo sapiens GN=NARS PE=1 SV=1	1	2	2	2	2	2	2	1	2	2	2	2	2	2	2	2	1	2	2	2	2	2	2	2	2	1	2	2	2	2	2	4.7	4.7	4.7	62.942	548	548	0	9.2222	By MS/MS	By MS/MS	By MS/MS
O43865;H0Y8B3;Q96HN2	O43865;H0Y8B3;Q96HN2	3;2;2	3;2;2	3;2;2	Putative adenosylhomocysteinase 2;Adenosylhomocysteinase;Putative adenosylhomocysteinase 3	AHCYL1;AHCYL2	sp|O43865|SAHH2_HUMAN Adenosylhomocysteinase 2 OS=Homo sapiens GN=AHCYL1 PE=1 SV=2;tr|H0Y8B3|H0Y8B3_HUMAN Adenosylhomocysteinase (Fragment) OS=Homo sapiens GN=AHCYL2 PE=1 SV=1;sp|Q96HN2|SAHH3_HUMAN Adenosylhomocysteinase 3 OS=Homo sapiens GN=AHCYL2 PE=1 SV	3	3	3	3	2	2	2	2	1	2	1	3	1	2	2	2	2	1	2	1	3	1	2	2	2	2	1	2	1	3	1	6.6	6.6	6.6	58.951	530	530;518;611	0	5.3439	By MS/MS	By matching	By MS/MS
O60506;B7Z645;F6UXX1	O60506;B7Z645	13;10;5	13;10;5	8;6;3	Heterogeneous nuclear ribonucleoprotein Q	SYNCRIP	sp|O60506|HNRPQ_HUMAN Heterogeneous nuclear ribonucleoprotein Q OS=Homo sapiens GN=SYNCRIP PE=1 SV=2;tr|B7Z645|B7Z645_HUMAN Heterogeneous nuclear ribonucleoprotein Q OS=Homo sapiens GN=SYNCRIP PE=1 SV=1	3	13	13	8	11	12	11	12	12	11	10	11	12	11	12	11	12	12	11	10	11	12	7	7	7	7	7	7	5	7	7	25.2	25.2	17.5	69.602	623	623;464;185	0	57.704	By MS/MS	By MS/MS	By MS/MS
O60749;D6RC15	O60749	6;1	6;1	4;1	Sorting nexin-2	SNX2	sp|O60749|SNX2_HUMAN Sorting nexin-2 OS=Homo sapiens GN=SNX2 PE=1 SV=2	2	6	6	4	6	6	6	6	6	6	6	6	6	6	6	6	6	6	6	6	6	6	4	4	4	4	4	4	4	4	4	14.3	14.3	10.2	58.47	519	519;266	0	34.012	By MS/MS	By MS/MS	By MS/MS
O60763	O60763	2	2	2	General vesicular transport factor p115	USO1	sp|O60763|USO1_HUMAN General vesicular transport factor p115 OS=Homo sapiens GN=USO1 PE=1 SV=2	1	2	2	2	0	0	1	1	2	1	1	2	0	0	0	1	1	2	1	1	2	0	0	0	1	1	2	1	1	2	0	2.5	2.5	2.5	107.89	962	962	0	4.0691			By MS/MS
O60783	O60783	2	2	2	28S ribosomal protein S14, mitochondrial	MRPS14	sp|O60783|RT14_HUMAN 28S ribosomal protein S14, mitochondrial OS=Homo sapiens GN=MRPS14 PE=1 SV=1	1	2	2	2	2	0	2	2	1	2	0	2	1	2	0	2	2	1	2	0	2	1	2	0	2	2	1	2	0	2	1	21.9	21.9	21.9	15.139	128	128	0	5.0898	By MS/MS		By MS/MS
O60832;H7C2Q9;H7C2Q2;H7C0M1;C9IYT0	O60832;H7C2Q9;H7C2Q2;H7C0M1;C9IYT0	2;1;1;1;1	2;1;1;1;1	2;1;1;1;1	H/ACA ribonucleoprotein complex subunit 4	DKC1	sp|O60832|DKC1_HUMAN H/ACA ribonucleoprotein complex subunit 4 OS=Homo sapiens GN=DKC1 PE=1 SV=3;tr|H7C2Q9|H7C2Q9_HUMAN H/ACA ribonucleoprotein complex subunit 4 (Fragment) OS=Homo sapiens GN=DKC1 PE=1 SV=1;tr|H7C2Q2|H7C2Q2_HUMAN H/ACA ribonucleoprotein co	5	2	2	2	0	1	1	1	1	1	0	1	2	0	1	1	1	1	1	0	1	2	0	1	1	1	1	1	0	1	2	6.8	6.8	6.8	57.673	514	514;169;207;229;259	0	3.9729		By matching	By matching
O60869	O60869	1	1	1	Endothelial differentiation-related factor 1	EDF1	sp|O60869|EDF1_HUMAN Endothelial differentiation-related factor 1 OS=Homo sapiens GN=EDF1 PE=1 SV=1	1	1	1	1	1	1	1	1	1	1	1	1	1	1	1	1	1	1	1	1	1	1	1	1	1	1	1	1	1	1	1	10.1	10.1	10.1	16.368	148	148	0	6.5215	By MS/MS	By matching	By MS/MS
O60884;A0A087WT48;I3L320	O60884	14;5;2	14;5;2	14;5;2	DnaJ homolog subfamily A member 2	DNAJA2	sp|O60884|DNJA2_HUMAN DnaJ homolog subfamily A member 2 OS=Homo sapiens GN=DNAJA2 PE=1 SV=1	3	14	14	14	11	13	13	12	12	10	13	14	14	11	13	13	12	12	10	13	14	14	11	13	13	12	12	10	13	14	14	33.5	33.5	33.5	45.745	412	412;134;47	0	38.455	By MS/MS	By MS/MS	By MS/MS
O60885;M0QZD9;M0QYW0;M0R0H4	O60885;M0QZD9	33;19;4;3	29;17;4;3	24;13;4;3	Bromodomain-containing protein 4	BRD4	sp|O60885|BRD4_HUMAN Bromodomain-containing protein 4 OS=Homo sapiens GN=BRD4 PE=1 SV=2;tr|M0QZD9|M0QZD9_HUMAN Bromodomain-containing protein 4 (Fragment) OS=Homo sapiens GN=BRD4 PE=1 SV=1	4	33	29	24	24	30	30	32	30	31	28	31	30	20	26	26	28	26	27	25	28	26	15	21	21	23	21	22	20	23	21	27.4	25.1	22.2	152.22	1362	1362;572;146;105	0	139.55	By MS/MS	By MS/MS	By MS/MS
O75116;E9PF63;D6REE7;Q14DU5;C9JFJ0	O75116;E9PF63;D6REE7;Q14DU5	8;5;4;4;1	6;5;2;4;0	6;5;2;4;0	Rho-associated protein kinase 2	ROCK2	sp|O75116|ROCK2_HUMAN Rho-associated protein kinase 2 OS=Homo sapiens GN=ROCK2 PE=1 SV=4;tr|E9PF63|E9PF63_HUMAN Rho-associated protein kinase 2 OS=Homo sapiens GN=ROCK2 PE=1 SV=1;tr|D6REE7|D6REE7_HUMAN Rho-associated protein kinase 2 OS=Homo sapiens GN=ROC	5	8	6	6	2	3	5	5	4	6	5	4	3	1	1	3	3	2	4	3	3	2	1	1	3	3	2	4	3	3	2	7.1	5.8	5.8	160.9	1388	1388;1145;446;703;203	0	15.243	By MS/MS	By matching	By MS/MS
O75342	O75342	3	3	3	Arachidonate 12-lipoxygenase, 12R-type	ALOX12B	sp|O75342|LX12B_HUMAN Arachidonate 12-lipoxygenase, 12R-type OS=Homo sapiens GN=ALOX12B PE=1 SV=1	1	3	3	3	1	3	1	2	1	2	3	1	0	1	3	1	2	1	2	3	1	0	1	3	1	2	1	2	3	1	0	5	5	5	80.355	701	701	0	9.9289	By matching	By MS/MS	By MS/MS
O75348	O75348	1	1	1	V-type proton ATPase subunit G 1	ATP6V1G1	sp|O75348|VATG1_HUMAN V-type proton ATPase subunit G 1 OS=Homo sapiens GN=ATP6V1G1 PE=1 SV=3	1	1	1	1	0	1	1	1	1	0	0	1	1	0	1	1	1	1	0	0	1	1	0	1	1	1	1	0	0	1	1	9.3	9.3	9.3	13.757	118	118	0	3.1018		By MS/MS	By MS/MS
O75369;E7EN95;H7C5L4;F8WE98;Q14315	O75369;E7EN95	8;7;2;1;1	8;7;2;1;1	7;7;2;0;0	Filamin-B	FLNB	sp|O75369|FLNB_HUMAN Filamin-B OS=Homo sapiens GN=FLNB PE=1 SV=2;tr|E7EN95|E7EN95_HUMAN Filamin-B OS=Homo sapiens GN=FLNB PE=1 SV=1	5	8	8	7	4	4	7	5	6	5	3	5	5	4	4	7	5	6	5	3	5	5	3	3	6	4	5	4	2	4	4	3.8	3.8	3.4	278.16	2602	2602;2409;135;604;2725	0	18.855	By MS/MS	By MS/MS	By MS/MS
O75396;A0A087X1A9	O75396;A0A087X1A9	2;1	2;1	2;1	Vesicle-trafficking protein SEC22b	SEC22B	sp|O75396|SC22B_HUMAN Vesicle-trafficking protein SEC22b OS=Homo sapiens GN=SEC22B PE=1 SV=4;tr|A0A087X1A9|A0A087X1A9_HUMAN Vesicle-trafficking protein SEC22b (Fragment) OS=Homo sapiens GN=SEC22B PE=1 SV=1	2	2	2	2	2	2	2	2	2	1	1	2	2	2	2	2	2	2	1	1	2	2	2	2	2	2	2	1	1	2	2	11.2	11.2	11.2	24.593	215	215;79	0	13.508	By MS/MS	By MS/MS	By MS/MS
O75400	O75400	1	1	1	Pre-mRNA-processing factor 40 homolog A	PRPF40A	sp|O75400|PR40A_HUMAN Pre-mRNA-processing factor 40 homolog A OS=Homo sapiens GN=PRPF40A PE=1 SV=2	1	1	1	1	1	1	0	1	0	0	0	0	0	1	1	0	1	0	0	0	0	0	1	1	0	1	0	0	0	0	0	1	1	1	108.8	957	957	0.0035874	2.7772	By MS/MS	By MS/MS
Q5JRI1;O75494;Q6IQ42;R4GMP8	Q5JRI1;O75494	6;6;2;1	6;6;2;1	4;4;2;1	Serine/arginine-rich splicing factor 10	SRSF10	tr|Q5JRI1|Q5JRI1_HUMAN Serine/arginine-rich-splicing factor 10 OS=Homo sapiens GN=SRSF10 PE=1 SV=1;sp|O75494|SRS10_HUMAN Serine/arginine-rich splicing factor 10 OS=Homo sapiens GN=SRSF10 PE=1 SV=1	4	6	6	4	5	5	5	6	6	5	5	6	5	5	5	5	6	6	5	5	6	5	3	3	3	4	4	3	3	4	3	39.5	39.5	26.7	20.913	172	172;262;69;40	0	88.72	By MS/MS	By MS/MS	By MS/MS
O75533	O75533	4	4	4	Splicing factor 3B subunit 1	SF3B1	sp|O75533|SF3B1_HUMAN Splicing factor 3B subunit 1 OS=Homo sapiens GN=SF3B1 PE=1 SV=3	1	4	4	4	1	1	3	0	0	0	1	3	1	1	1	3	0	0	0	1	3	1	1	1	3	0	0	0	1	3	1	4.2	4.2	4.2	145.83	1304	1304	0	8.0622	By matching	By matching	By MS/MS
O75643;B4E0P5	O75643	14;2	14;2	14;2	U5 small nuclear ribonucleoprotein 200 kDa helicase	SNRNP200	sp|O75643|U520_HUMAN U5 small nuclear ribonucleoprotein 200 kDa helicase OS=Homo sapiens GN=SNRNP200 PE=1 SV=2	2	14	14	14	10	6	10	9	9	10	7	10	5	10	6	10	9	9	10	7	10	5	10	6	10	9	9	10	7	10	5	7.8	7.8	7.8	244.5	2136	2136;595	0	36.15	By MS/MS	By MS/MS	By MS/MS
O75683	O75683	3	3	3	Surfeit locus protein 6	SURF6	sp|O75683|SURF6_HUMAN Surfeit locus protein 6 OS=Homo sapiens GN=SURF6 PE=1 SV=3	1	3	3	3	3	3	3	3	2	3	3	2	2	3	3	3	3	2	3	3	2	2	3	3	3	3	2	3	3	2	2	12.2	12.2	12.2	41.45	361	361	0	7.2696	By MS/MS	By MS/MS	By MS/MS
O75822;H0YGJ7;H0YLP3	O75822	4;1;1	4;1;1	4;1;1	Eukaryotic translation initiation factor 3 subunit J	EIF3J	sp|O75822|EIF3J_HUMAN Eukaryotic translation initiation factor 3 subunit J OS=Homo sapiens GN=EIF3J PE=1 SV=2	3	4	4	4	4	4	4	4	3	4	3	4	4	4	4	4	4	3	4	3	4	4	4	4	4	4	3	4	3	4	4	17.1	17.1	17.1	29.062	258	258;106;117	0	10.578	By MS/MS	By MS/MS	By MS/MS
O75874;C9JJE5;C9JLU6;C9J4N6	O75874	3;1;1;1	3;1;1;1	3;1;1;1	Isocitrate dehydrogenase [NADP] cytoplasmic	IDH1	sp|O75874|IDHC_HUMAN Isocitrate dehydrogenase [NADP] cytoplasmic OS=Homo sapiens GN=IDH1 PE=1 SV=2	4	3	3	3	2	2	2	2	2	2	2	2	3	2	2	2	2	2	2	2	2	3	2	2	2	2	2	2	2	2	3	10.1	10.1	10.1	46.659	414	414;62;74;157	0	6.9767	By matching	By MS/MS	By MS/MS
O75937	O75937	2	2	2	DnaJ homolog subfamily C member 8	DNAJC8	sp|O75937|DNJC8_HUMAN DnaJ homolog subfamily C member 8 OS=Homo sapiens GN=DNAJC8 PE=1 SV=2	1	2	2	2	1	0	1	1	0	0	0	1	0	1	0	1	1	0	0	0	1	0	1	0	1	1	0	0	0	1	0	9.5	9.5	9.5	29.841	253	253	0	4.727	By MS/MS		By MS/MS
O76003	O76003	9	9	9	Glutaredoxin-3	GLRX3	sp|O76003|GLRX3_HUMAN Glutaredoxin-3 OS=Homo sapiens GN=GLRX3 PE=1 SV=2	1	9	9	9	7	5	7	8	9	8	9	7	4	7	5	7	8	9	8	9	7	4	7	5	7	8	9	8	9	7	4	32.8	32.8	32.8	37.432	335	335	0	30.194	By MS/MS	By MS/MS	By MS/MS
O76094;D6RDY6	O76094;D6RDY6	3;2	3;2	3;2	Signal recognition particle subunit SRP72	SRP72	sp|O76094|SRP72_HUMAN Signal recognition particle subunit SRP72 OS=Homo sapiens GN=SRP72 PE=1 SV=3;tr|D6RDY6|D6RDY6_HUMAN Signal recognition particle subunit SRP72 (Fragment) OS=Homo sapiens GN=SRP72 PE=1 SV=2	2	3	3	3	2	1	3	3	2	2	2	3	1	2	1	3	3	2	2	2	3	1	2	1	3	3	2	2	2	3	1	6.1	6.1	6.1	74.605	671	671;357	0	10.98	By MS/MS	By matching	By MS/MS
O94776;E9PCS8;E7EQY4;E7EV10;Q9BTC8;D6W5A2;H0YIT0;E9PF88	O94776	39;5;5;5;5;4;1;1	39;5;5;5;5;4;1;1	36;2;2;2;2;2;0;0	Metastasis-associated protein MTA2	MTA2	sp|O94776|MTA2_HUMAN Metastasis-associated protein MTA2 OS=Homo sapiens GN=MTA2 PE=1 SV=1	8	39	39	36	38	37	36	36	37	37	36	36	38	38	37	36	36	37	37	36	36	38	35	34	33	34	34	34	34	34	35	62.3	62.3	57.8	75.022	668	668;392;514;590;594;537;57;91	0	238.07	By MS/MS	By MS/MS	By MS/MS
X6RI56;O94886	X6RI56;O94886	1;1	1;1	1;1	CSC1-like protein 1	TMEM63A	tr|X6RI56|X6RI56_HUMAN CSC1-like protein 1 (Fragment) OS=Homo sapiens GN=TMEM63A PE=1 SV=1;sp|O94886|CSCL1_HUMAN CSC1-like protein 1 OS=Homo sapiens GN=TMEM63A PE=1 SV=3	2	1	1	1	1	1	1	1	1	1	1	1	1	1	1	1	1	1	1	1	1	1	1	1	1	1	1	1	1	1	1	10.2	10.2	10.2	13.328	118	118;807	0.0043328	2.5684	By MS/MS	By matching	By matching
O94903;E5RFX7;E5RG77	O94903;E5RFX7;E5RG77	2;1;1	2;1;1	2;1;1	Proline synthase co-transcribed bacterial homolog protein	PROSC	sp|O94903|PROSC_HUMAN Proline synthase co-transcribed bacterial homolog protein OS=Homo sapiens GN=PROSC PE=1 SV=1;tr|E5RFX7|E5RFX7_HUMAN Proline synthase co-transcribed bacterial homolog protein (Fragment) OS=Homo sapiens GN=PROSC PE=1 SV=1;tr|E5RG77|E5RG	3	2	2	2	1	0	1	2	1	2	2	1	1	1	0	1	2	1	2	2	1	1	1	0	1	2	1	2	2	1	1	8	8	8	30.344	275	275;137;152	0	5.7113	By matching		By matching
O95104	O95104	6	4	4	Splicing factor, arginine/serine-rich 15	SCAF4	sp|O95104|SFR15_HUMAN Splicing factor, arginine/serine-rich 15 OS=Homo sapiens GN=SCAF4 PE=1 SV=3	1	6	4	4	6	4	4	5	5	6	6	4	3	4	3	3	3	3	4	4	3	2	4	3	3	3	3	4	4	3	2	10	8.4	8.4	125.87	1147	1147	0	14.88	By MS/MS	By MS/MS	By MS/MS
O95202	O95202	2	2	2	LETM1 and EF-hand domain-containing protein 1, mitochondrial	LETM1	sp|O95202|LETM1_HUMAN LETM1 and EF-hand domain-containing protein 1, mitochondrial OS=Homo sapiens GN=LETM1 PE=1 SV=1	1	2	2	2	1	1	2	1	0	0	1	2	1	1	1	2	1	0	0	1	2	1	1	1	2	1	0	0	1	2	1	3.2	3.2	3.2	83.353	739	739	0	5.3988	By matching	By matching	By MS/MS
O95391	O95391	5	5	5	Pre-mRNA-splicing factor SLU7	SLU7	sp|O95391|SLU7_HUMAN Pre-mRNA-splicing factor SLU7 OS=Homo sapiens GN=SLU7 PE=1 SV=2	1	5	5	5	4	1	4	5	5	5	3	4	3	4	1	4	5	5	5	3	4	3	4	1	4	5	5	5	3	4	3	10.6	10.6	10.6	68.386	586	586	0	12.032	By MS/MS	By MS/MS	By MS/MS
O95394;A0A087WT27;J3KN95;D6RCD1;H0Y8I3;D6RC77;D6RCQ8;D6RF77;D6RIS6;H0Y987	O95394;A0A087WT27;J3KN95	5;4;4;1;1;1;1;1;1;1	5;4;4;1;1;1;1;1;1;1	5;4;4;1;1;1;1;1;1;1	Phosphoacetylglucosamine mutase	PGM3	sp|O95394|AGM1_HUMAN Phosphoacetylglucosamine mutase OS=Homo sapiens GN=PGM3 PE=1 SV=1;tr|A0A087WT27|A0A087WT27_HUMAN Phosphoacetylglucosamine mutase OS=Homo sapiens GN=PGM3 PE=1 SV=1;tr|J3KN95|J3KN95_HUMAN Phosphoacetylglucosamine mutase OS=Homo sapiens G	10	5	5	5	0	3	1	3	5	4	4	4	1	0	3	1	3	5	4	4	4	1	0	3	1	3	5	4	4	4	1	9	9	9	59.851	542	542;441;461;71;113;114;147;157;173;197	0	15.731		By MS/MS	By matching
O95433;H0YJU2;G3V438;G3V3W9;H0YJG7;H0YJ63	O95433;H0YJU2;G3V438	7;4;4;2;2;1	7;4;4;2;2;1	7;4;4;2;2;1	Activator of 90 kDa heat shock protein ATPase homolog 1	AHSA1	sp|O95433|AHSA1_HUMAN Activator of 90 kDa heat shock protein ATPase homolog 1 OS=Homo sapiens GN=AHSA1 PE=1 SV=1;tr|H0YJU2|H0YJU2_HUMAN Activator of 90 kDa heat shock protein ATPase homolog 1 (Fragment) OS=Homo sapiens GN=AHSA1 PE=1 SV=1;tr|G3V438|G3V438_H	6	7	7	7	5	4	6	6	6	7	7	7	4	5	4	6	6	6	7	7	7	4	5	4	6	6	6	7	7	7	4	24.3	24.3	24.3	38.274	338	338;133;203;100;216;90	0	22.019	By MS/MS	By MS/MS	By MS/MS
O95757;E9PDE8;D6RJ96	O95757;E9PDE8;D6RJ96	7;6;5	5;4;3	5;4;3	Heat shock 70 kDa protein 4L	HSPA4L	sp|O95757|HS74L_HUMAN Heat shock 70 kDa protein 4L OS=Homo sapiens GN=HSPA4L PE=1 SV=3;tr|E9PDE8|E9PDE8_HUMAN Heat shock 70 kDa protein 4L OS=Homo sapiens GN=HSPA4L PE=1 SV=1;tr|D6RJ96|D6RJ96_HUMAN Heat shock 70 kDa protein 4L (Fragment) OS=Homo sapiens GN	3	7	5	5	3	1	5	3	2	4	1	3	1	2	0	3	2	1	2	0	2	1	2	0	3	2	1	2	0	2	1	11.1	7.5	7.5	94.511	839	839;813;531	0	8.6072	By matching	By matching	By MS/MS
O95801	O95801	7	7	7	Tetratricopeptide repeat protein 4	TTC4	sp|O95801|TTC4_HUMAN Tetratricopeptide repeat protein 4 OS=Homo sapiens GN=TTC4 PE=1 SV=3	1	7	7	7	5	4	5	7	5	6	5	7	4	5	4	5	7	5	6	5	7	4	5	4	5	7	5	6	5	7	4	26.9	26.9	26.9	44.678	387	387	0	21.316	By MS/MS	By MS/MS	By MS/MS
O95831;E9PMA0	O95831	6;2	6;2	6;2	Apoptosis-inducing factor 1, mitochondrial	AIFM1	sp|O95831|AIFM1_HUMAN Apoptosis-inducing factor 1, mitochondrial OS=Homo sapiens GN=AIFM1 PE=1 SV=1	2	6	6	6	5	3	6	4	2	1	3	5	4	5	3	6	4	2	1	3	5	4	5	3	6	4	2	1	3	5	4	11.9	11.9	11.9	66.9	613	613;274	0	13.713	By matching	By MS/MS	By MS/MS
P00338;F5GXH2;F5GYU2;F5GXY2;F5H5J4;F5H6W8;F5GZQ4;F5H8H6;F5GXC7;F5GWW2;F5GXU1	P00338	11;4;4;4;3;3;2;1;1;1;1	10;4;4;4;3;3;2;1;1;1;1	10;4;4;4;3;3;2;1;1;1;1	L-lactate dehydrogenase A chain	LDHA	sp|P00338|LDHA_HUMAN L-lactate dehydrogenase A chain OS=Homo sapiens GN=LDHA PE=1 SV=2	11	11	10	10	11	11	11	11	11	11	11	11	11	10	10	10	10	10	10	10	10	10	10	10	10	10	10	10	10	10	10	34.6	31	31	36.688	332	332;114;144;157;89;94;72;42;45;45;46	0	54.571	By MS/MS	By MS/MS	By MS/MS
P00367;P49448	P00367;P49448	2;1	2;1	2;1	Glutamate dehydrogenase 1, mitochondrial;Glutamate dehydrogenase 2, mitochondrial	GLUD1;GLUD2	sp|P00367|DHE3_HUMAN Glutamate dehydrogenase 1, mitochondrial OS=Homo sapiens GN=GLUD1 PE=1 SV=2;sp|P49448|DHE4_HUMAN Glutamate dehydrogenase 2, mitochondrial OS=Homo sapiens GN=GLUD2 PE=1 SV=2	2	2	2	2	0	0	2	0	0	0	0	2	1	0	0	2	0	0	0	0	2	1	0	0	2	0	0	0	0	2	1	5.7	5.7	5.7	61.397	558	558;558	0	3.9571			By MS/MS
P00374;B4DM58;C9JJ68;Q86XF0	P00374;B4DM58	11;8;3;3	11;8;3;3	11;8;3;3	Dihydrofolate reductase	DHFR	sp|P00374|DYR_HUMAN Dihydrofolate reductase OS=Homo sapiens GN=DHFR PE=1 SV=2;tr|B4DM58|B4DM58_HUMAN Dihydrofolate reductase OS=Homo sapiens GN=DHFR PE=1 SV=1	4	11	11	11	11	10	9	11	11	11	11	11	10	11	10	9	11	11	11	11	11	10	11	10	9	11	11	11	11	11	10	66.8	66.8	66.8	21.452	187	187;129;114;187	0	37.025	By MS/MS	By MS/MS	By MS/MS
P00387;B1AHF3	P00387;B1AHF3	4;2	4;2	4;2	NADH-cytochrome b5 reductase 3;NADH-cytochrome b5 reductase 3 membrane-bound form;NADH-cytochrome b5 reductase 3 soluble form	CYB5R3	sp|P00387|NB5R3_HUMAN NADH-cytochrome b5 reductase 3 OS=Homo sapiens GN=CYB5R3 PE=1 SV=3;tr|B1AHF3|B1AHF3_HUMAN NADH-cytochrome b5 reductase 3 (Fragment) OS=Homo sapiens GN=CYB5R3 PE=1 SV=1	2	4	4	4	3	3	3	4	4	4	4	4	3	3	3	3	4	4	4	4	4	3	3	3	3	4	4	4	4	4	3	19.9	19.9	19.9	34.234	301	301;147	0	10.459	By MS/MS	By MS/MS	By MS/MS
P00390;H0YC68;E5RI06	P00390	6;2;2	6;2;2	6;2;2	Glutathione reductase, mitochondrial	GSR	sp|P00390|GSHR_HUMAN Glutathione reductase, mitochondrial OS=Homo sapiens GN=GSR PE=1 SV=2	3	6	6	6	4	4	5	5	5	5	5	5	4	4	4	5	5	5	5	5	5	4	4	4	5	5	5	5	5	5	4	11.7	11.7	11.7	56.256	522	522;131;145	0	18.943	By MS/MS	By MS/MS	By MS/MS
P00403	P00403	2	2	2	Cytochrome c oxidase subunit 2	MT-CO2	sp|P00403|COX2_HUMAN Cytochrome c oxidase subunit 2 OS=Homo sapiens GN=MT-CO2 PE=1 SV=1	1	2	2	2	1	0	1	1	1	0	0	2	0	1	0	1	1	1	0	0	2	0	1	0	1	1	1	0	0	2	0	15.9	15.9	15.9	25.565	227	227	0	4.5857	By matching		By matching
P00491;G3V5M2;G3V2H3;G3V393	P00491;G3V5M2;G3V2H3	6;4;3;1	6;4;3;1	6;4;3;1	Purine nucleoside phosphorylase	PNP	sp|P00491|PNPH_HUMAN Purine nucleoside phosphorylase OS=Homo sapiens GN=PNP PE=1 SV=2;tr|G3V5M2|G3V5M2_HUMAN Purine nucleoside phosphorylase (Fragment) OS=Homo sapiens GN=PNP PE=1 SV=1;tr|G3V2H3|G3V2H3_HUMAN Purine nucleoside phosphorylase (Fragment) OS=Ho	4	6	6	6	3	4	5	4	3	2	5	3	1	3	4	5	4	3	2	5	3	1	3	4	5	4	3	2	5	3	1	28.7	28.7	28.7	32.118	289	289;221;93;61	0	11.982	By MS/MS	By MS/MS	By MS/MS
P00492	P00492	9	9	9	Hypoxanthine-guanine phosphoribosyltransferase	HPRT1	sp|P00492|HPRT_HUMAN Hypoxanthine-guanine phosphoribosyltransferase OS=Homo sapiens GN=HPRT1 PE=1 SV=2	1	9	9	9	8	8	9	9	8	9	9	9	9	8	8	9	9	8	9	9	9	9	8	8	9	9	8	9	9	9	9	49.5	49.5	49.5	24.579	218	218	0	37.018	By MS/MS	By MS/MS	By MS/MS
P00505	P00505	5	5	5	Aspartate aminotransferase, mitochondrial	GOT2	sp|P00505|AATM_HUMAN Aspartate aminotransferase, mitochondrial OS=Homo sapiens GN=GOT2 PE=1 SV=3	1	5	5	5	3	3	5	4	2	1	4	5	3	3	3	5	4	2	1	4	5	3	3	3	5	4	2	1	4	5	3	13.7	13.7	13.7	47.517	430	430	0	19.164	By MS/MS	By MS/MS	By MS/MS
P00558;P07205	P00558	19;5	19;5	19;5	Phosphoglycerate kinase 1	PGK1	sp|P00558|PGK1_HUMAN Phosphoglycerate kinase 1 OS=Homo sapiens GN=PGK1 PE=1 SV=3	2	19	19	19	16	14	17	19	17	16	17	18	13	16	14	17	19	17	16	17	18	13	16	14	17	19	17	16	17	18	13	53	53	53	44.614	417	417;417	0	72.831	By MS/MS	By MS/MS	By MS/MS
P00918;E5RID5;E5RK37	P00918	10;4;4	10;4;4	10;4;4	Carbonic anhydrase 2	CA2	sp|P00918|CAH2_HUMAN Carbonic anhydrase 2 OS=Homo sapiens GN=CA2 PE=1 SV=2	3	10	10	10	10	9	9	10	10	9	9	10	10	10	9	9	10	10	9	9	10	10	10	9	9	10	10	9	9	10	10	48.5	48.5	48.5	29.246	260	260;97;101	0	48.89	By MS/MS	By MS/MS	By MS/MS
P02545;Q3BDU5;Q5TCI8;A0A0C4DGC5	P02545;Q3BDU5;Q5TCI8	3;2;2;1	3;2;2;1	3;2;2;1	Prelamin-A/C;Lamin-A/C	LMNA	sp|P02545|LMNA_HUMAN Prelamin-A/C OS=Homo sapiens GN=LMNA PE=1 SV=1;tr|Q3BDU5|Q3BDU5_HUMAN Prelamin-A/C OS=Homo sapiens GN=LMNA PE=1 SV=1;tr|Q5TCI8|Q5TCI8_HUMAN Prelamin-A/C OS=Homo sapiens GN=LMNA PE=1 SV=1	4	3	3	3	3	1	2	3	1	2	0	2	3	3	1	2	3	1	2	0	2	3	3	1	2	3	1	2	0	2	3	5.1	5.1	5.1	74.139	664	664;487;491;260	0	10.965	By MS/MS	By MS/MS	By MS/MS
P04040	P04040	7	7	7	Catalase	CAT	sp|P04040|CATA_HUMAN Catalase OS=Homo sapiens GN=CAT PE=1 SV=3	1	7	7	7	6	5	5	4	5	5	7	7	4	6	5	5	4	5	5	7	7	4	6	5	5	4	5	5	7	7	4	17.5	17.5	17.5	59.755	527	527	0	29.798	By MS/MS	By MS/MS	By MS/MS
P04075;H3BQN4;J3KPS3;H3BPS8;H3BUH7;H3BR04;H3BMQ8;H3BR68;H3BU78;A0A087WXX2;P05062	P04075;H3BQN4;J3KPS3;H3BPS8	18;16;16;12;8;8;7;5;5;1;1	18;16;16;12;8;8;7;5;5;1;1	14;12;14;8;8;8;7;5;5;0;0	Fructose-bisphosphate aldolase A;Fructose-bisphosphate aldolase	ALDOA	sp|P04075|ALDOA_HUMAN Fructose-bisphosphate aldolase A OS=Homo sapiens GN=ALDOA PE=1 SV=2;tr|H3BQN4|H3BQN4_HUMAN Fructose-bisphosphate aldolase OS=Homo sapiens GN=ALDOA PE=1 SV=1;tr|J3KPS3|J3KPS3_HUMAN Fructose-bisphosphate aldolase OS=Homo sapiens GN=ALDO	11	18	18	14	17	17	18	18	17	18	17	18	16	17	17	18	18	17	18	17	18	16	14	13	14	14	14	14	13	14	14	59.9	59.9	48.4	39.42	364	364;361;368;278;155;162;140;130;204;316;364	0	121.18	By MS/MS	By MS/MS	By MS/MS
P04181	P04181	1	1	1	Ornithine aminotransferase, mitochondrial;Ornithine aminotransferase, hepatic form;Ornithine aminotransferase, renal form	OAT	sp|P04181|OAT_HUMAN Ornithine aminotransferase, mitochondrial OS=Homo sapiens GN=OAT PE=1 SV=1	1	1	1	1	1	0	1	0	0	0	0	1	0	1	0	1	0	0	0	0	1	0	1	0	1	0	0	0	0	1	0	3.2	3.2	3.2	48.534	439	439	0	5.6374	By matching		By MS/MS
P04259	P04259	29	1	1	Keratin, type II cytoskeletal 6B	KRT6B	sp|P04259|K2C6B_HUMAN Keratin, type II cytoskeletal 6B OS=Homo sapiens GN=KRT6B PE=1 SV=5	1	29	1	1	27	29	28	28	28	29	29	28	27	1	1	1	1	1	1	1	1	1	1	1	1	1	1	1	1	1	1	47.3	1.6	1.6	60.066	564	564	1	-2	By matching	By matching	By matching
P04264;CON__P04264	P04264;CON__P04264	40;39	36;35	24;23	Keratin, type II cytoskeletal 1	KRT1	sp|P04264|K2C1_HUMAN Keratin, type II cytoskeletal 1 OS=Homo sapiens GN=KRT1 PE=1 SV=6;	2	40	36	24	37	39	38	37	38	37	39	39	38	33	35	34	33	34	33	35	35	34	22	24	22	22	23	22	24	23	22	53.3	50.2	39	66.038	644	644;644	0	323.31	By MS/MS	By MS/MS	By MS/MS
P04406;E7EUT5;O14556	P04406;E7EUT5	14;12;1	14;12;1	14;12;1	Glyceraldehyde-3-phosphate dehydrogenase	GAPDH	sp|P04406|G3P_HUMAN Glyceraldehyde-3-phosphate dehydrogenase OS=Homo sapiens GN=GAPDH PE=1 SV=3;tr|E7EUT5|E7EUT5_HUMAN Glyceraldehyde-3-phosphate dehydrogenase OS=Homo sapiens GN=GAPDH PE=1 SV=1	3	14	14	14	14	14	14	14	14	14	13	14	14	14	14	14	14	14	14	13	14	14	14	14	14	14	14	14	13	14	14	57.3	57.3	57.3	36.053	335	335;260;408	0	127.77	By MS/MS	By MS/MS	By MS/MS
P04843;B7Z4L4;F8WF32	P04843;B7Z4L4	5;4;1	5;4;1	5;4;1	Dolichyl-diphosphooligosaccharide--protein glycosyltransferase subunit 1	RPN1	sp|P04843|RPN1_HUMAN Dolichyl-diphosphooligosaccharide--protein glycosyltransferase subunit 1 OS=Homo sapiens GN=RPN1 PE=1 SV=1;tr|B7Z4L4|B7Z4L4_HUMAN Dolichyl-diphosphooligosaccharide--protein glycosyltransferase subunit 1 OS=Homo sapiens GN=RPN1 PE=1 SV=	3	5	5	5	5	4	5	4	2	2	5	5	2	5	4	5	4	2	2	5	5	2	5	4	5	4	2	2	5	5	2	9.7	9.7	9.7	68.569	607	607;435;121	0	13.374	By MS/MS	By MS/MS	By MS/MS
P04844	P04844	2	2	2	Dolichyl-diphosphooligosaccharide--protein glycosyltransferase subunit 2	RPN2	sp|P04844|RPN2_HUMAN Dolichyl-diphosphooligosaccharide--protein glycosyltransferase subunit 2 OS=Homo sapiens GN=RPN2 PE=1 SV=3	1	2	2	2	0	0	2	0	0	0	0	1	2	0	0	2	0	0	0	0	1	2	0	0	2	0	0	0	0	1	2	3.6	3.6	3.6	69.283	631	631	0	5.0596			By MS/MS
P05023;M0R116;B1AKY9;A0A0A0MT26;P13637;P50993;H0Y7C1;Q13733;P20648;P54707;M0QXF2;E9PRA5;Q5TC01;Q5TC05	P05023;M0R116;B1AKY9;A0A0A0MT26;P13637;P50993	22;11;11;11;11;11;9;5;3;3;2;2;1;1	22;11;11;11;11;11;9;5;3;3;2;2;1;1	22;11;11;11;11;11;9;5;3;3;2;2;1;1	Sodium/potassium-transporting ATPase subunit alpha-1;Sodium/potassium-transporting ATPase subunit alpha-3;Sodium/potassium-transporting ATPase subunit alpha-2	ATP1A1;ATP1A3;ATP1A2	sp|P05023|AT1A1_HUMAN Sodium/potassium-transporting ATPase subunit alpha-1 OS=Homo sapiens GN=ATP1A1 PE=1 SV=1;tr|M0R116|M0R116_HUMAN Sodium/potassium-transporting ATPase subunit alpha OS=Homo sapiens GN=ATP1A3 PE=1 SV=1;tr|B1AKY9|B1AKY9_HUMAN Sodium/potas	14	22	22	22	18	16	18	22	20	21	18	21	15	18	16	18	22	20	21	18	21	15	18	16	18	22	20	21	18	21	15	26.4	26.4	26.4	112.89	1023	1023;983;1009;1226;1013;1020;714;1029;1035;1039;251;517;144;157	0	103.93	By MS/MS	By MS/MS	By MS/MS
P05089	P05089	5	5	5	Arginase-1	ARG1	sp|P05089|ARGI1_HUMAN Arginase-1 OS=Homo sapiens GN=ARG1 PE=1 SV=2	1	5	5	5	4	4	5	4	3	5	5	4	5	4	4	5	4	3	5	5	4	5	4	4	5	4	3	5	5	4	5	18.9	18.9	18.9	34.735	322	322	0	14.648	By MS/MS	By MS/MS	By MS/MS
P05141;P12235;V9GYG0;Q9H0C2	P05141;P12235	12;6;5;3	12;6;5;3	5;1;1;0	ADP/ATP translocase 2;ADP/ATP translocase 2, N-terminally processed;ADP/ATP translocase 1	SLC25A5;SLC25A4	sp|P05141|ADT2_HUMAN ADP/ATP translocase 2 OS=Homo sapiens GN=SLC25A5 PE=1 SV=7;sp|P12235|ADT1_HUMAN ADP/ATP translocase 1 OS=Homo sapiens GN=SLC25A4 PE=1 SV=4	4	12	12	5	11	10	10	9	9	10	10	11	7	11	10	10	9	9	10	10	11	7	5	4	4	4	4	3	4	5	3	39.6	39.6	18.5	32.852	298	298;298;208;315	0	39.696	By MS/MS	By MS/MS	By MS/MS
P05165;H0Y5U0	P05165	11;1	11;1	11;1	Propionyl-CoA carboxylase alpha chain, mitochondrial	PCCA	sp|P05165|PCCA_HUMAN Propionyl-CoA carboxylase alpha chain, mitochondrial OS=Homo sapiens GN=PCCA PE=1 SV=4	2	11	11	11	5	8	6	9	9	8	9	9	3	5	8	6	9	9	8	9	9	3	5	8	6	9	9	8	9	9	3	21.3	21.3	21.3	80.058	728	728;139	0	41.114	By MS/MS	By MS/MS	By MS/MS
P05386	P05386	1	1	1	60S acidic ribosomal protein P1	RPLP1	sp|P05386|RLA1_HUMAN 60S acidic ribosomal protein P1 OS=Homo sapiens GN=RPLP1 PE=1 SV=1	1	1	1	1	1	1	1	1	1	1	1	1	1	1	1	1	1	1	1	1	1	1	1	1	1	1	1	1	1	1	1	14	14	14	11.514	114	114	0	9.8658	By matching	By MS/MS	By MS/MS
P05387;H0YDD8	P05387;H0YDD8	4;2	4;2	4;2	60S acidic ribosomal protein P2	RPLP2	sp|P05387|RLA2_HUMAN 60S acidic ribosomal protein P2 OS=Homo sapiens GN=RPLP2 PE=1 SV=1;tr|H0YDD8|H0YDD8_HUMAN 60S acidic ribosomal protein P2 (Fragment) OS=Homo sapiens GN=RPLP2 PE=1 SV=1	2	4	4	4	4	4	4	4	3	4	4	4	4	4	4	4	4	3	4	4	4	4	4	4	4	4	3	4	4	4	4	67	67	67	11.665	115	115;92	0	16.5	By MS/MS	By MS/MS	By MS/MS
P05388;F8VU65;F8VWS0;F8VPE8;G3V210;Q8NHW5;F8VQY6;F8VRK7;F8VW21;F8VS58;F8VZS0;F8VWV4;F8W1K8	P05388;F8VU65;F8VWS0;F8VPE8;G3V210;Q8NHW5;F8VQY6;F8VRK7;F8VW21;F8VS58;F8VZS0	9;8;8;7;7;7;6;6;6;5;5;4;1	9;8;8;7;7;7;6;6;6;5;5;4;1	9;8;8;7;7;7;6;6;6;5;5;4;1	60S acidic ribosomal protein P0;60S acidic ribosomal protein P0-like	RPLP0;RPLP0P6	sp|P05388|RLA0_HUMAN 60S acidic ribosomal protein P0 OS=Homo sapiens GN=RPLP0 PE=1 SV=1;tr|F8VU65|F8VU65_HUMAN 60S acidic ribosomal protein P0 (Fragment) OS=Homo sapiens GN=RPLP0 PE=1 SV=1;tr|F8VWS0|F8VWS0_HUMAN 60S acidic ribosomal protein P0 OS=Homo sapi	13	9	9	9	7	7	8	7	6	6	7	7	5	7	7	8	7	6	6	7	7	5	7	7	8	7	6	6	7	7	5	40.1	40.1	40.1	34.273	317	317;247;281;153;166;317;142;156;244;121;246;111;107	0	34.557	By MS/MS	By MS/MS	By MS/MS
P05455;E7ERC4;E9PGX9;E9PFL9	P05455;E7ERC4	9;5;4;3	9;5;4;3	9;5;4;3	Lupus La protein	SSB	sp|P05455|LA_HUMAN Lupus La protein OS=Homo sapiens GN=SSB PE=1 SV=2;tr|E7ERC4|E7ERC4_HUMAN Lupus La protein (Fragment) OS=Homo sapiens GN=SSB PE=1 SV=1	4	9	9	9	6	5	8	8	6	8	7	9	7	6	5	8	8	6	8	7	9	7	6	5	8	8	6	8	7	9	7	27.5	27.5	27.5	46.836	408	408;184;120;134	0	34.587	By MS/MS	By MS/MS	By MS/MS
P06576;H0YH81;F8W0P7;F8W079;H0YI37	P06576;H0YH81	5;4;2;2;1	5;4;2;2;1	5;4;2;2;1	ATP synthase subunit beta, mitochondrial;ATP synthase subunit beta	ATP5B	sp|P06576|ATPB_HUMAN ATP synthase subunit beta, mitochondrial OS=Homo sapiens GN=ATP5B PE=1 SV=3;tr|H0YH81|H0YH81_HUMAN ATP synthase subunit beta (Fragment) OS=Homo sapiens GN=ATP5B PE=1 SV=1	5	5	5	5	4	4	5	5	3	4	4	5	3	4	4	5	5	3	4	4	5	3	4	4	5	5	3	4	4	5	3	14	14	14	56.559	529	529;362;270;284;133	0	16.72	By MS/MS	By MS/MS	By MS/MS
P06733;K7EM90;E5RI09;E5RG95;K7EPM1;K7EKN2;E5RGZ4;P13929	P06733;K7EM90	18;10;1;1;1;1;1;1	18;10;1;1;1;1;1;1	17;9;0;0;0;0;0;0	Alpha-enolase;Enolase	ENO1	sp|P06733|ENOA_HUMAN Alpha-enolase OS=Homo sapiens GN=ENO1 PE=1 SV=2;tr|K7EM90|K7EM90_HUMAN Alpha-enolase (Fragment) OS=Homo sapiens GN=ENO1 PE=1 SV=1	8	18	18	17	17	18	18	17	16	17	16	18	15	17	18	18	17	16	17	16	18	15	16	17	17	16	15	16	15	17	14	51.2	51.2	47	47.168	434	434;195;148;154;196;212;283;434	0	101.94	By MS/MS	By MS/MS	By MS/MS
P06748;E5RGW4;E5RI98	P06748	5;1;1	5;1;1	5;1;1	Nucleophosmin	NPM1	sp|P06748|NPM_HUMAN Nucleophosmin OS=Homo sapiens GN=NPM1 PE=1 SV=2	3	5	5	5	5	5	5	4	4	3	5	5	5	5	5	5	4	4	3	5	5	5	5	5	5	4	4	3	5	5	5	21.1	21.1	21.1	32.575	294	294;59;111	0	26.791	By MS/MS	By MS/MS	By MS/MS
P06753	P06753	13	1	0	Tropomyosin alpha-3 chain	TPM3	sp|P06753|TPM3_HUMAN Tropomyosin alpha-3 chain OS=Homo sapiens GN=TPM3 PE=1 SV=2	1	13	1	0	12	13	13	12	13	12	11	12	13	1	1	1	1	1	1	1	1	1	0	0	0	0	0	0	0	0	0	37.2	4.6	0	32.95	285	285	0	8.0007	By matching	By matching	By matching
P07195;A8MW50;C9J7H8;F5H793;F5H5G7;F5H155;A0A087WUM2;G3XAP5;F5H245;Q6ZMR3;P07864	P07195;A8MW50;C9J7H8;F5H793	16;10;9;8;1;1;1;1;1;1;1	16;10;9;8;1;1;1;1;1;1;1	15;9;9;8;0;0;0;0;0;0;0	L-lactate dehydrogenase B chain;L-lactate dehydrogenase	LDHB	sp|P07195|LDHB_HUMAN L-lactate dehydrogenase B chain OS=Homo sapiens GN=LDHB PE=1 SV=2;tr|A8MW50|A8MW50_HUMAN L-lactate dehydrogenase (Fragment) OS=Homo sapiens GN=LDHB PE=1 SV=1;tr|C9J7H8|C9J7H8_HUMAN L-lactate dehydrogenase B chain (Fragment) OS=Homo sap	11	16	16	15	15	14	15	15	15	16	15	15	15	15	14	15	15	15	16	15	15	15	14	13	14	14	14	15	14	14	14	48.8	48.8	45.2	36.638	334	334;232;137;102;183;225;233;241;318;332;332	0	90.591	By MS/MS	By MS/MS	By MS/MS
P07355;H0YMD0;H0YMU9;H0YN42;H0YKS4;H0YM50;A6NMY6;H0YNA0;H0YKV8;H0YKL9;H0YKZ7;H0YLV6;H0YMT9;H0YKX9;H0YN28;H0YL33;H0YMW4;H0YMM1;H0YNP5;H0YN52;H0YMD9;H0YNB8;H0YKN4	P07355;H0YMD0;H0YMU9;H0YN42;H0YKS4;H0YM50;A6NMY6	7;6;6;6;5;4;4;3;3;3;3;3;3;3;3;3;3;3;3;2;2;1;1	7;6;6;6;5;4;4;3;3;3;3;3;3;3;3;3;3;3;3;2;2;1;1	7;6;6;6;5;4;4;3;3;3;3;3;3;3;3;3;3;3;3;2;2;1;1	Annexin A2;Annexin;Putative annexin A2-like protein	ANXA2;ANXA2P2	sp|P07355|ANXA2_HUMAN Annexin A2 OS=Homo sapiens GN=ANXA2 PE=1 SV=2;tr|H0YMD0|H0YMD0_HUMAN Annexin (Fragment) OS=Homo sapiens GN=ANXA2 PE=1 SV=1;tr|H0YMU9|H0YMU9_HUMAN Annexin OS=Homo sapiens GN=ANXA2 PE=1 SV=1;tr|H0YN42|H0YN42_HUMAN Annexin (Fragment) OS=	23	7	7	7	5	4	5	3	5	2	4	5	3	5	4	5	3	5	2	4	5	3	5	4	5	3	5	2	4	5	3	22.1	22.1	22.1	38.604	339	339;227;230;256;176;248;339;79;81;110;119;132;133;134;139;142;146;149;175;59;65;47;69	0	18.271	By MS/MS	By MS/MS	By MS/MS
P07384;E9PIA9;E9PLX0;E9PJJ3;E9PLC9;E9PMC6;E9PJA6;E9PSA6;E9PQB3;E9PRM1	P07384;E9PIA9;E9PLX0;E9PJJ3;E9PLC9;E9PMC6;E9PJA6;E9PSA6;E9PQB3;E9PRM1	2;1;1;1;1;1;1;1;1;1	2;1;1;1;1;1;1;1;1;1	2;1;1;1;1;1;1;1;1;1	Calpain-1 catalytic subunit	CAPN1	sp|P07384|CAN1_HUMAN Calpain-1 catalytic subunit OS=Homo sapiens GN=CAPN1 PE=1 SV=1;tr|E9PIA9|E9PIA9_HUMAN Calpain-1 catalytic subunit (Fragment) OS=Homo sapiens GN=CAPN1 PE=1 SV=1;tr|E9PLX0|E9PLX0_HUMAN Calpain-1 catalytic subunit (Fragment) OS=Homo sapie	10	2	2	2	1	2	1	1	1	1	1	1	1	1	2	1	1	1	1	1	1	1	1	2	1	1	1	1	1	1	1	2.7	2.7	2.7	81.889	714	714;63;122;136;148;152;162;163;191;201	0	4.6166	By MS/MS	By MS/MS	By MS/MS
Q5JP53;P07437;Q5ST81;Q9BVA1;Q13885;M0R1I1	Q5JP53;P07437;Q5ST81;Q9BVA1;Q13885	16;16;13;11;11;1	16;16;13;11;11;1	3;3;1;0;0;0	Tubulin beta chain;Tubulin beta-2B chain;Tubulin beta-2A chain	TUBB;TUBB2B;TUBB2A	tr|Q5JP53|Q5JP53_HUMAN Tubulin beta chain OS=Homo sapiens GN=TUBB PE=1 SV=1;sp|P07437|TBB5_HUMAN Tubulin beta chain OS=Homo sapiens GN=TUBB PE=1 SV=2;tr|Q5ST81|Q5ST81_HUMAN Tubulin beta chain OS=Homo sapiens GN=TUBB PE=1 SV=1;sp|Q9BVA1|TBB2B_HUMAN Tubulin	6	16	16	3	16	15	16	15	14	16	16	16	15	16	15	16	15	14	16	16	16	15	3	2	3	3	2	3	3	3	3	52.1	52.1	12.7	47.766	426	426;444;372;445;445;74	0	156.76	By MS/MS	By MS/MS	By MS/MS
P07737;K7EJ44;CON__P02584;I3L3D5	P07737;K7EJ44;CON__P02584	6;4;3;2	6;4;3;2	6;4;3;2	Profilin-1	PFN1	sp|P07737|PROF1_HUMAN Profilin-1 OS=Homo sapiens GN=PFN1 PE=1 SV=2;tr|K7EJ44|K7EJ44_HUMAN Profilin OS=Homo sapiens GN=PFN1 PE=1 SV=1;	4	6	6	6	6	6	6	6	5	6	6	6	6	6	6	6	6	5	6	6	6	6	6	6	6	6	5	6	6	6	6	49.3	49.3	49.3	15.054	140	140;104;140;165	0	30.328	By MS/MS	By MS/MS	By MS/MS
P07814;V9GYZ6;V9GZ76	P07814;V9GYZ6	18;11;1	18;11;1	18;11;1	Bifunctional glutamate/proline--tRNA ligase;Glutamate--tRNA ligase;Proline--tRNA ligase	EPRS	sp|P07814|SYEP_HUMAN Bifunctional glutamate/proline--tRNA ligase OS=Homo sapiens GN=EPRS PE=1 SV=5;tr|V9GYZ6|V9GYZ6_HUMAN Bifunctional glutamate/proline--tRNA ligase (Fragment) OS=Homo sapiens GN=EPRS PE=1 SV=1	3	18	18	18	12	12	11	16	12	12	9	14	8	12	12	11	16	12	12	9	14	8	12	12	11	16	12	12	9	14	8	16	16	16	170.59	1512	1512;968;194	0	59.175	By MS/MS	By MS/MS	By MS/MS
P07900;Q14568;Q58FG0;G3V2J8	P07900	36;8;7;6	23;3;3;4	22;3;3;4	Heat shock protein HSP 90-alpha	HSP90AA1	sp|P07900|HS90A_HUMAN Heat shock protein HSP 90-alpha OS=Homo sapiens GN=HSP90AA1 PE=1 SV=5	4	36	23	22	35	32	35	35	34	36	35	35	32	22	21	22	22	21	23	22	22	19	21	20	21	21	20	22	21	21	18	46.6	29.4	28.4	84.659	732	732;343;334;174	0	191.52	By MS/MS	By MS/MS	By MS/MS
Q5TCU3;Q5TCU8;P07951;CON__Q3SX28	Q5TCU3;Q5TCU8;P07951;CON__Q3SX28	10;10;10;9	2;2;2;2	1;1;1;1	Tropomyosin beta chain	TPM2	tr|Q5TCU3|Q5TCU3_HUMAN Tropomyosin beta chain OS=Homo sapiens GN=TPM2 PE=1 SV=1;tr|Q5TCU8|Q5TCU8_HUMAN Tropomyosin beta chain OS=Homo sapiens GN=TPM2 PE=1 SV=1;sp|P07951|TPM2_HUMAN Tropomyosin beta chain OS=Homo sapiens GN=TPM2 PE=1 SV=1;	4	10	2	1	9	9	9	9	10	9	9	10	10	1	1	1	1	2	1	1	2	2	1	1	1	1	1	1	1	1	1	31	7.7	3.2	32.814	284	284;322;284;284	0	10.048	By MS/MS	By MS/MS	By MS/MS
P08238;Q58FF7	P08238	38;14	38;14	19;5	Heat shock protein HSP 90-beta	HSP90AB1	sp|P08238|HS90B_HUMAN Heat shock protein HSP 90-beta OS=Homo sapiens GN=HSP90AB1 PE=1 SV=4	2	38	38	19	37	33	38	35	37	35	37	36	36	37	33	38	35	37	35	37	36	36	18	18	19	18	18	17	18	17	17	52.9	52.9	28.2	83.263	724	724;597	0	323.31	By MS/MS	By MS/MS	By MS/MS
P08243;C9JT45;C9J057;F8WEJ5;C9JLN6;C9JM09	P08243;C9JT45;C9J057;F8WEJ5	4;2;2;2;1;1	4;2;2;2;1;1	4;2;2;2;1;1	Asparagine synthetase [glutamine-hydrolyzing]	ASNS	sp|P08243|ASNS_HUMAN Asparagine synthetase [glutamine-hydrolyzing] OS=Homo sapiens GN=ASNS PE=1 SV=4;tr|C9JT45|C9JT45_HUMAN Asparagine synthetase [glutamine-hydrolyzing] (Fragment) OS=Homo sapiens GN=ASNS PE=1 SV=1;tr|C9J057|C9J057_HUMAN Asparagine synthet	6	4	4	4	2	2	3	2	2	2	3	4	1	2	2	3	2	2	2	3	4	1	2	2	3	2	2	2	3	4	1	8.6	8.6	8.6	64.369	561	561;162;215;401;63;119	0	8.0529	By MS/MS	By MS/MS	By MS/MS
Q5JPU3;P08559	Q5JPU3;P08559	1;1	1;1	1;1	Pyruvate dehydrogenase E1 component subunit alpha, somatic form, mitochondrial	PDHA1	tr|Q5JPU3|Q5JPU3_HUMAN Pyruvate dehydrogenase E1 component subunit alpha, somatic form, mitochondrial OS=Homo sapiens GN=PDHA1 PE=1 SV=1;sp|P08559|ODPA_HUMAN Pyruvate dehydrogenase E1 component subunit alpha, somatic form, mitochondrial OS=Homo sapiens GN=	2	1	1	1	0	0	1	1	0	0	0	1	0	0	0	1	1	0	0	0	1	0	0	0	1	1	0	0	0	1	0	11.9	11.9	11.9	12.588	109	109;390	0	3.7956			By MS/MS
P08579;M0R268	P08579;M0R268	2;1	2;1	1;0	U2 small nuclear ribonucleoprotein B	SNRPB2;SNRPA	sp|P08579|RU2B_HUMAN U2 small nuclear ribonucleoprotein B OS=Homo sapiens GN=SNRPB2 PE=1 SV=1;tr|M0R268|M0R268_HUMAN U1 small nuclear ribonucleoprotein A (Fragment) OS=Homo sapiens GN=SNRPA PE=1 SV=1	2	2	2	1	0	0	2	1	0	0	0	0	0	0	0	2	1	0	0	0	0	0	0	0	1	0	0	0	0	0	0	8.4	8.4	4.9	25.486	225	225;256	0	4.2137			By MS/MS
P08621;M0QYR1;M0QX04	P08621	18;8;2	18;8;2	18;8;2	U1 small nuclear ribonucleoprotein 70 kDa	SNRNP70	sp|P08621|RU17_HUMAN U1 small nuclear ribonucleoprotein 70 kDa OS=Homo sapiens GN=SNRNP70 PE=1 SV=2	3	18	18	18	18	18	18	17	18	17	17	17	18	18	18	18	17	18	17	17	17	18	18	18	18	17	18	17	17	17	18	38.2	38.2	38.2	51.556	437	437;94;33	0	99.691	By MS/MS	By MS/MS	By MS/MS
P08708;H0YN88;A0A075B716;H0YN73	P08708;H0YN88;A0A075B716	3;2;2;1	3;2;2;1	3;2;2;1	40S ribosomal protein S17	RPS17	sp|P08708|RS17_HUMAN 40S ribosomal protein S17 OS=Homo sapiens GN=RPS17 PE=1 SV=2;tr|H0YN88|H0YN88_HUMAN 40S ribosomal protein S17 OS=Homo sapiens GN=RPS17 PE=1 SV=1;tr|A0A075B716|A0A075B716_HUMAN 40S ribosomal protein S17 OS=Homo sapiens GN=RPS17 PE=1 SV=	4	3	3	3	2	3	2	2	2	2	2	3	2	2	3	2	2	2	2	2	3	2	2	3	2	2	2	2	2	3	2	31.9	31.9	31.9	15.55	135	135;136;191;59	0	7.336	By MS/MS	By MS/MS	By MS/MS
P08754;A0A087WTB6;A2A2R6;Q5JWD1;H0Y7E8;A0A087WZE5;Q5JWE9;H0Y7F4;P11488;P63096;P19087;P09471;A8MTJ3;P04899;P38405;P63092;Q5JWF2	P08754;A0A087WTB6;A2A2R6;Q5JWD1;H0Y7E8;A0A087WZE5;Q5JWE9;H0Y7F4;P11488;P63096;P19087;P09471;A8MTJ3;P04899;P38405;P63092;Q5JWF2	2;1;1;1;1;1;1;1;1;1;1;1;1;1;1;1;1	2;1;1;1;1;1;1;1;1;1;1;1;1;1;1;1;1	2;1;1;1;1;1;1;1;1;1;1;1;1;1;1;1;1	Guanine nucleotide-binding protein G(k) subunit alpha;Guanine nucleotide-binding protein G(t) subunit alpha-1;Guanine nucleotide-binding protein G(i) subunit alpha-1;Guanine nucleotide-binding protein G(t) subunit alpha-2;Guanine nucleotide-binding protein G(o) subunit alpha;Guanine nucleotide-binding protein G(t) subunit alpha-3;Guanine nucleotide-binding protein G(i) subunit alpha-2;Guanine nuc…	GNAI3;GNAO1;GNAS;GNAT2;GNAT1;GNAI1;GNAT3;GNAI2;GNAL	sp|P08754|GNAI3_HUMAN Guanine nucleotide-binding protein G(k) subunit alpha OS=Homo sapiens GN=GNAI3 PE=1 SV=3;tr|A0A087WTB6|A0A087WTB6_HUMAN Guanine nucleotide-binding protein G(o) subunit alpha OS=Homo sapiens GN=GNAO1 PE=1 SV=1;tr|A2A2R6|A2A2R6_HUMAN Gu	17	2	2	2	1	0	2	1	2	2	1	2	2	1	0	2	1	2	2	1	2	2	1	0	2	1	2	2	1	2	2	7.3	7.3	7.3	40.532	354	354;54;61;87;93;124;193;199;350;354;354;354;354;355;381;394;1037	0	4.3723	By matching		By matching
P08758;D6RBL5;D6RBE9;E9PHT9;D6RCN3	P08758;D6RBL5;D6RBE9	9;7;6;4;1	9;7;6;4;1	9;7;6;4;1	Annexin A5;Annexin	ANXA5	sp|P08758|ANXA5_HUMAN Annexin A5 OS=Homo sapiens GN=ANXA5 PE=1 SV=2;tr|D6RBL5|D6RBL5_HUMAN Annexin OS=Homo sapiens GN=ANXA5 PE=1 SV=1;tr|D6RBE9|D6RBE9_HUMAN Annexin OS=Homo sapiens GN=ANXA5 PE=1 SV=1	5	9	9	9	6	6	7	8	6	5	5	9	4	6	6	7	8	6	5	5	9	4	6	6	7	8	6	5	5	9	4	31.9	31.9	31.9	35.936	320	320;260;220;163;35	0	27.21	By MS/MS	By MS/MS	By MS/MS
P09104;F5H0C8;F5H1C3;U3KQP4	P09104;F5H0C8	6;5;2;1	5;4;1;1	5;4;1;1	Gamma-enolase;Enolase	ENO2	sp|P09104|ENOG_HUMAN Gamma-enolase OS=Homo sapiens GN=ENO2 PE=1 SV=3;tr|F5H0C8|F5H0C8_HUMAN Gamma-enolase OS=Homo sapiens GN=ENO2 PE=1 SV=1	4	6	5	5	3	3	4	4	4	5	3	4	3	2	2	3	3	3	4	2	3	2	2	2	3	3	3	4	2	3	2	18.9	14.7	14.7	47.268	434	434;315;103;73	0	13.034	By matching	By MS/MS	By MS/MS
Q5T7C4;P09429;B2RPK0;P23497	Q5T7C4;P09429;B2RPK0	13;13;9;2	13;13;9;2	12;12;8;2	High mobility group protein B1;Putative high mobility group protein B1-like 1	HMGB1;HMGB1P1	tr|Q5T7C4|Q5T7C4_HUMAN High mobility group protein B1 OS=Homo sapiens GN=HMGB1 PE=1 SV=1;sp|P09429|HMGB1_HUMAN High mobility group protein B1 OS=Homo sapiens GN=HMGB1 PE=1 SV=3;sp|B2RPK0|HGB1A_HUMAN Putative high mobility group protein B1-like 1 OS=Homo sa	4	13	13	12	12	12	11	13	13	13	13	13	13	12	12	11	13	13	13	13	13	13	11	11	11	12	12	12	12	12	12	54.4	54.4	46.8	18.311	158	158;215;211;879	0	116.43	By MS/MS	By MS/MS	By MS/MS
P09669	P09669	2	2	2	Cytochrome c oxidase subunit 6C	COX6C	sp|P09669|COX6C_HUMAN Cytochrome c oxidase subunit 6C OS=Homo sapiens GN=COX6C PE=1 SV=2	1	2	2	2	1	0	2	1	1	1	1	1	1	1	0	2	1	1	1	1	1	1	1	0	2	1	1	1	1	1	1	20	20	20	8.7813	75	75	0	3.363	By matching		By MS/MS
P09874;Q5VX84;Q5VX85	P09874	21;1;1	21;1;1	21;1;1	Poly [ADP-ribose] polymerase 1	PARP1	sp|P09874|PARP1_HUMAN Poly [ADP-ribose] polymerase 1 OS=Homo sapiens GN=PARP1 PE=1 SV=4	3	21	21	21	16	12	21	15	15	10	16	19	14	16	12	21	15	15	10	16	19	14	16	12	21	15	15	10	16	19	14	25.9	25.9	25.9	113.08	1014	1014;108;155	0	80.493	By MS/MS	By MS/MS	By MS/MS
P09960;B4DEH5	P09960	6;1	6;1	6;1	Leukotriene A-4 hydrolase	LTA4H	sp|P09960|LKHA4_HUMAN Leukotriene A-4 hydrolase OS=Homo sapiens GN=LTA4H PE=1 SV=2	2	6	6	6	5	4	4	6	4	4	3	6	2	5	4	4	6	4	4	3	6	2	5	4	4	6	4	4	3	6	2	13.4	13.4	13.4	69.284	611	611;132	0	15.485	By MS/MS	By MS/MS	By matching
P09972;K7EKH5;C9J8F3;J3KSV6;J3QKP5;A8MVZ9	P09972	5;1;1;1;1;1	1;1;1;1;1;1	1;1;1;1;1;1	Fructose-bisphosphate aldolase C	ALDOC	sp|P09972|ALDOC_HUMAN Fructose-bisphosphate aldolase C OS=Homo sapiens GN=ALDOC PE=1 SV=2	6	5	1	1	4	5	5	4	4	5	4	5	3	1	1	1	0	1	1	0	1	1	1	1	1	0	1	1	0	1	1	17.9	6.3	6.3	39.455	364	364;135;149;175;180;336	0	3.5692	By matching	By matching	By matching
P0DN76;Q01081;Q8WU68;M0QYK5;M0R2N4	P0DN76;Q01081	8;8;2;1;1	8;8;2;1;1	8;8;2;1;1	Splicing factor U2AF 35 kDa subunit	U2AF1	sp|P0DN76|U2AF5_HUMAN Splicing factor U2AF 35 kDa subunit-like protein OS=Homo sapiens GN=U2AF1L5 PE=1 SV=1;sp|Q01081|U2AF1_HUMAN Splicing factor U2AF 35 kDa subunit OS=Homo sapiens GN=U2AF1 PE=1 SV=3	5	8	8	8	8	8	8	7	7	8	8	8	7	8	8	8	7	7	8	8	8	7	8	8	8	7	7	8	8	8	7	39.2	39.2	39.2	27.872	240	240;240;220;66;97	0	62.312	By MS/MS	By MS/MS	By MS/MS
P0DN79;P35520;C9JMA6	P0DN79;P35520;C9JMA6	2;2;1	2;2;1	2;2;1	Cystathionine beta-synthase	CBS	sp|P0DN79|CBSL_HUMAN Cystathionine beta-synthase-like protein OS=Homo sapiens GN=CBSL PE=1 SV=1;sp|P35520|CBS_HUMAN Cystathionine beta-synthase OS=Homo sapiens GN=CBS PE=1 SV=2;tr|C9JMA6|C9JMA6_HUMAN Cystathionine beta-synthase (Fragment) OS=Homo sapiens G	3	2	2	2	1	1	2	2	0	0	1	2	1	1	1	2	2	0	0	1	2	1	1	1	2	2	0	0	1	2	1	5.4	5.4	5.4	60.586	551	551;551;177	0	5.8934	By matching	By matching	By MS/MS
P10412;P16402;Q02539;P22492;P16401	P10412;P16402	7;6;3;2;2	7;6;3;2;2	1;0;0;0;0	Histone H1.4;Histone H1.3	HIST1H1E;HIST1H1D	sp|P10412|H14_HUMAN Histone H1.4 OS=Homo sapiens GN=HIST1H1E PE=1 SV=2;sp|P16402|H13_HUMAN Histone H1.3 OS=Homo sapiens GN=HIST1H1D PE=1 SV=2	5	7	7	1	7	6	7	6	7	6	7	7	7	7	6	7	6	7	6	7	7	7	1	1	1	1	1	1	1	1	1	29.7	29.7	7.3	21.865	219	219;221;215;207;226	0	34.84	By MS/MS	By MS/MS	By MS/MS
P10599	P10599	5	5	5	Thioredoxin	TXN	sp|P10599|THIO_HUMAN Thioredoxin OS=Homo sapiens GN=TXN PE=1 SV=3	1	5	5	5	5	5	4	5	5	5	5	5	4	5	5	4	5	5	5	5	5	4	5	5	4	5	5	5	5	5	4	40	40	40	11.737	105	105	0	22.681	By MS/MS	By MS/MS	By MS/MS
P10768;X6RA14;H7BZT7;U3KQT1	P10768;X6RA14;H7BZT7	7;6;5;3	7;6;5;3	7;6;5;3	S-formylglutathione hydrolase	ESD	sp|P10768|ESTD_HUMAN S-formylglutathione hydrolase OS=Homo sapiens GN=ESD PE=1 SV=2;tr|X6RA14|X6RA14_HUMAN S-formylglutathione hydrolase OS=Homo sapiens GN=ESD PE=1 SV=1;tr|H7BZT7|H7BZT7_HUMAN S-formylglutathione hydrolase (Fragment) OS=Homo sapiens GN=ESD	4	7	7	7	7	7	7	7	7	7	7	7	7	7	7	7	7	7	7	7	7	7	7	7	7	7	7	7	7	7	7	41.5	41.5	41.5	31.462	282	282;253;230;120	0	36.047	By MS/MS	By MS/MS	By MS/MS
P10809;E7EXB4;E7ESH4;C9JL25;C9JL19;C9JCQ4	P10809	15;5;5;2;1;1	15;5;5;2;1;1	15;5;5;2;1;1	60 kDa heat shock protein, mitochondrial	HSPD1	sp|P10809|CH60_HUMAN 60 kDa heat shock protein, mitochondrial OS=Homo sapiens GN=HSPD1 PE=1 SV=2	6	15	15	15	13	14	13	12	10	9	10	14	13	13	14	13	12	10	9	10	14	13	13	14	13	12	10	9	10	14	13	34.4	34.4	34.4	61.054	573	573;221;234;175;83;94	0	104.27	By MS/MS	By MS/MS	By MS/MS
P11021	P11021	8	7	7	78 kDa glucose-regulated protein	HSPA5	sp|P11021|GRP78_HUMAN 78 kDa glucose-regulated protein OS=Homo sapiens GN=HSPA5 PE=1 SV=2	1	8	7	7	7	5	7	6	2	4	1	7	6	6	4	6	5	1	3	0	6	5	6	4	6	5	1	3	0	6	5	16.5	14.1	14.1	72.332	654	654	0	23.025	By MS/MS	By MS/MS	By MS/MS
P11142;E9PKE3;E9PNE6;A8K7Q2;E9PN89;E9PS65;E9PM13;E9PLF4;E9PQQ4;E9PQK7;E9PK54;E9PPY6;E9PI65;P54652;E9PN25	P11142;E9PKE3;E9PNE6;A8K7Q2	33;32;25;20;15;14;11;11;10;10;10;8;8;8;7	33;32;25;20;15;14;11;11;10;10;10;8;8;8;7	26;25;19;15;13;10;8;9;9;9;9;7;6;3;6	Heat shock cognate 71 kDa protein	HSPA8	sp|P11142|HSP7C_HUMAN Heat shock cognate 71 kDa protein OS=Homo sapiens GN=HSPA8 PE=1 SV=1;tr|E9PKE3|E9PKE3_HUMAN Heat shock cognate 71 kDa protein OS=Homo sapiens GN=HSPA8 PE=1 SV=1;tr|E9PNE6|E9PNE6_HUMAN Heat shock cognate 71 kDa protein OS=Homo sapiens	15	33	33	26	30	32	31	33	32	32	33	31	32	30	32	31	33	32	32	33	31	32	23	25	24	26	25	25	26	24	25	52.9	52.9	47.4	70.897	646	646;627;500;410;312;223;151;187;171;178;184;137;168;639;132	0	258.55	By MS/MS	By MS/MS	By MS/MS
Q4VB86;P11171	Q4VB86;P11171	2;2	2;2	2;2	Protein 4.1	EPB41	tr|Q4VB86|Q4VB86_HUMAN EPB41 protein OS=Homo sapiens GN=EPB41 PE=1 SV=2;sp|P11171|41_HUMAN Protein 4.1 OS=Homo sapiens GN=EPB41 PE=1 SV=4	2	2	2	2	0	1	2	1	2	1	0	0	1	0	1	2	1	2	1	0	0	1	0	1	2	1	2	1	0	0	1	3.5	3.5	3.5	69.889	622	622;864	0.0018382	3.0293		By matching	By MS/MS
P11172;E9PFD2	P11172;E9PFD2	2;1	2;1	2;1	Uridine 5-monophosphate synthase;Orotate phosphoribosyltransferase;Orotidine 5-phosphate decarboxylase	UMPS	sp|P11172|UMPS_HUMAN Uridine 5-monophosphate synthase OS=Homo sapiens GN=UMPS PE=1 SV=1;tr|E9PFD2|E9PFD2_HUMAN Uridine 5-monophosphate synthase OS=Homo sapiens GN=UMPS PE=1 SV=1	2	2	2	2	1	0	2	2	2	1	2	2	1	1	0	2	2	2	1	2	2	1	1	0	2	2	2	1	2	2	1	6	6	6	52.221	480	480;342	0	6.3684	By matching		By MS/MS
P11387	P11387	5	5	5	DNA topoisomerase 1	TOP1	sp|P11387|TOP1_HUMAN DNA topoisomerase 1 OS=Homo sapiens GN=TOP1 PE=1 SV=2	1	5	5	5	2	1	2	2	1	1	1	3	1	2	1	2	2	1	1	1	3	1	2	1	2	2	1	1	1	3	1	7.3	7.3	7.3	90.725	765	765	0	9.9427	By MS/MS	By matching	By MS/MS
P11498;E9PRE7;E9PS68	P11498	43;17;13	43;17;13	43;17;13	Pyruvate carboxylase, mitochondrial	PC	sp|P11498|PYC_HUMAN Pyruvate carboxylase, mitochondrial OS=Homo sapiens GN=PC PE=1 SV=2	3	43	43	43	33	35	35	39	40	37	41	40	23	33	35	35	39	40	37	41	40	23	33	35	35	39	40	37	41	40	23	50	50	50	129.63	1178	1178;489;298	0	279.67	By MS/MS	By MS/MS	By MS/MS
P11766;H0YAG8;D6RFE4;D6RAY0;D6R9G2	P11766;H0YAG8	14;7;3;2;2	14;7;3;2;2	14;7;3;2;2	Alcohol dehydrogenase class-3	ADH5	sp|P11766|ADHX_HUMAN Alcohol dehydrogenase class-3 OS=Homo sapiens GN=ADH5 PE=1 SV=4;tr|H0YAG8|H0YAG8_HUMAN Alcohol dehydrogenase class-3 (Fragment) OS=Homo sapiens GN=ADH5 PE=1 SV=1	5	14	14	14	12	13	12	12	12	14	13	10	13	12	13	12	12	12	14	13	10	13	12	13	12	12	12	14	13	10	13	40.9	40.9	40.9	39.724	374	374;262;115;56;95	0	81.031	By MS/MS	By MS/MS	By MS/MS
P11940;A0A087WTT1;E7EQV3;E7ERJ7;H0YAR2;Q9H361;H0YAP2;H0YB86;H0YBN4;E5RH24;E5RJB9;Q4VXU2;E5RGH3;H0YAS6;H0YB75;E5RHG7;H0YAS7;H0YC10;E5RGC4;E5RFD8;Q5JQF8;Q96DU9	P11940;A0A087WTT1;E7EQV3;E7ERJ7;H0YAR2	17;16;16;16;10;8;5;5;5;4;4;4;3;3;3;2;2;1;1;1;1;1	17;16;16;16;10;8;5;5;5;4;4;4;3;3;3;2;2;1;1;1;1;1	13;12;12;12;8;7;5;4;2;2;2;3;1;3;3;1;2;1;1;1;1;1	Polyadenylate-binding protein 1;Polyadenylate-binding protein	PABPC1	sp|P11940|PABP1_HUMAN Polyadenylate-binding protein 1 OS=Homo sapiens GN=PABPC1 PE=1 SV=2;tr|A0A087WTT1|A0A087WTT1_HUMAN Polyadenylate-binding protein OS=Homo sapiens GN=PABPC1 PE=1 SV=1;tr|E7EQV3|E7EQV3_HUMAN Polyadenylate-binding protein OS=Homo sapiens	22	17	17	13	10	12	13	12	13	11	10	14	13	10	12	13	12	13	11	10	14	13	7	9	10	9	9	8	7	10	10	32.2	32.2	26.4	70.67	636	636;522;591;604;284;631;131;165;175;118;129;614;108;169;183;75;136;42;43;61;200;382	0	46.899	By MS/MS	By MS/MS	By MS/MS
P12004	P12004	6	6	6	Proliferating cell nuclear antigen	PCNA	sp|P12004|PCNA_HUMAN Proliferating cell nuclear antigen OS=Homo sapiens GN=PCNA PE=1 SV=1	1	6	6	6	5	5	6	5	4	5	5	6	4	5	5	6	5	4	5	5	6	4	5	5	6	5	4	5	5	6	4	30.7	30.7	30.7	28.768	261	261	0	19.461	By MS/MS	By MS/MS	By MS/MS
P12277;G3V4N7;H0YJG0;G3V461;P06732;G3V2I1	P12277;G3V4N7	18;10;8;5;2;1	18;10;8;5;2;1	18;10;8;5;2;1	Creatine kinase B-type	CKB	sp|P12277|KCRB_HUMAN Creatine kinase B-type OS=Homo sapiens GN=CKB PE=1 SV=1;tr|G3V4N7|G3V4N7_HUMAN Creatine kinase B-type (Fragment) OS=Homo sapiens GN=CKB PE=1 SV=1	6	18	18	18	13	16	16	17	17	17	16	16	16	13	16	16	17	17	17	16	16	16	13	16	16	17	17	17	16	16	16	62.5	62.5	62.5	42.644	381	381;217;179;128;381;58	0	203.47	By MS/MS	By MS/MS	By MS/MS
P12532;C9JSQ1;F8WCN3;C9JJX8;C9J995;C9J8F6;P17540	P12532;C9JSQ1;F8WCN3	4;2;2;1;1;1;1	4;2;2;1;1;1;1	4;2;2;1;1;1;1	Creatine kinase U-type, mitochondrial	CKMT1A;CKMT1B	sp|P12532|KCRU_HUMAN Creatine kinase U-type, mitochondrial OS=Homo sapiens GN=CKMT1A PE=1 SV=1;tr|C9JSQ1|C9JSQ1_HUMAN Creatine kinase U-type, mitochondrial (Fragment) OS=Homo sapiens GN=CKMT1B PE=1 SV=1;tr|F8WCN3|F8WCN3_HUMAN Creatine kinase U-type, mitoch	7	4	4	4	4	4	4	4	4	3	3	4	3	4	4	4	4	4	3	3	4	3	4	4	4	4	4	3	3	4	3	14.1	14.1	14.1	47.036	417	417;241;298;103;129;148;419	0	13.913	By MS/MS	By MS/MS	By MS/MS
P13010;C9JZ81	P13010	3;1	3;1	3;1	X-ray repair cross-complementing protein 5	XRCC5	sp|P13010|XRCC5_HUMAN X-ray repair cross-complementing protein 5 OS=Homo sapiens GN=XRCC5 PE=1 SV=3	2	3	3	3	2	3	3	3	1	3	1	3	2	2	3	3	3	1	3	1	3	2	2	3	3	3	1	3	1	3	2	4.9	4.9	4.9	82.704	732	732;131	0	8.2447	By MS/MS	By MS/MS	By MS/MS
P13489;E9PMJ3;E9PLZ3;E9PIM9;H0YCR7	P13489	4;1;1;1;1	4;1;1;1;1	4;1;1;1;1	Ribonuclease inhibitor	RNH1	sp|P13489|RINI_HUMAN Ribonuclease inhibitor OS=Homo sapiens GN=RNH1 PE=1 SV=2	5	4	4	4	4	1	3	3	4	3	4	1	2	4	1	3	3	4	3	4	1	2	4	1	3	3	4	3	4	1	2	10	10	10	49.973	461	461;189;194;199;285	0	13.379	By MS/MS	By MS/MS	By MS/MS
P13639;M0R0I6;K7EJ74;K7EP67;Q15029	P13639	29;1;1;1;1	29;1;1;1;1	29;1;1;1;1	Elongation factor 2	EEF2	sp|P13639|EF2_HUMAN Elongation factor 2 OS=Homo sapiens GN=EEF2 PE=1 SV=4	5	29	29	29	28	28	27	28	27	29	29	28	29	28	28	27	28	27	29	29	28	29	28	28	27	28	27	29	29	28	29	35.3	35.3	35.3	95.337	858	858;85;134;223;972	0	126.33	By MS/MS	By MS/MS	By MS/MS
P13667	P13667	4	4	4	Protein disulfide-isomerase A4	PDIA4	sp|P13667|PDIA4_HUMAN Protein disulfide-isomerase A4 OS=Homo sapiens GN=PDIA4 PE=1 SV=2	1	4	4	4	1	1	4	1	0	0	1	3	3	1	1	4	1	0	0	1	3	3	1	1	4	1	0	0	1	3	3	8.1	8.1	8.1	72.932	645	645	0	8.4625	By matching	By matching	By MS/MS
P14174	P14174	2	2	2	Macrophage migration inhibitory factor	MIF	sp|P14174|MIF_HUMAN Macrophage migration inhibitory factor OS=Homo sapiens GN=MIF PE=1 SV=4	1	2	2	2	1	1	1	1	1	1	2	1	1	1	1	1	1	1	1	2	1	1	1	1	1	1	1	1	2	1	1	20.9	20.9	20.9	12.476	115	115	0	5.3592	By MS/MS	By matching	By MS/MS
P14618;H3BTN5;B4DNK4;H3BQ34;H3BR70;H3BUW1;H3BTJ2;H3BT25;H3BU13;H3BN34;H3BQZ3;P30613	P14618;H3BTN5;B4DNK4;H3BQ34	23;19;18;12;10;9;9;8;2;1;1;1	23;19;18;12;10;9;9;8;2;1;1;1	23;19;18;12;10;9;9;8;2;1;1;1	Pyruvate kinase PKM;Pyruvate kinase	PKM	sp|P14618|KPYM_HUMAN Pyruvate kinase PKM OS=Homo sapiens GN=PKM PE=1 SV=4;tr|H3BTN5|H3BTN5_HUMAN Pyruvate kinase (Fragment) OS=Homo sapiens GN=PKM PE=1 SV=1;tr|B4DNK4|B4DNK4_HUMAN Pyruvate kinase OS=Homo sapiens GN=PKM PE=1 SV=1;tr|H3BQ34|H3BQ34_HUMAN Pyru	12	23	23	23	21	20	22	21	19	18	22	23	19	21	20	22	21	19	18	22	23	19	21	20	22	21	19	18	22	23	19	53.1	53.1	53.1	57.936	531	531;485;457;281;366;162;168;151;82;52;69;574	0	122.93	By MS/MS	By MS/MS	By MS/MS
P14625;Q96GW1;F8W026;F8VPC7	P14625;Q96GW1	7;5;2;1	6;4;1;1	6;4;1;1	Endoplasmin	HSP90B1	sp|P14625|ENPL_HUMAN Endoplasmin OS=Homo sapiens GN=HSP90B1 PE=1 SV=1;tr|Q96GW1|Q96GW1_HUMAN Endoplasmin OS=Homo sapiens GN=HSP90B1 PE=1 SV=1	4	7	6	6	4	3	6	5	4	3	1	7	4	3	2	5	4	3	2	0	6	3	3	2	5	4	3	2	0	6	3	9.8	8.3	8.3	92.468	803	803;315;49;53	0	16.02	By MS/MS	By MS/MS	By MS/MS
P14735;Q5T5N3	P14735;Q5T5N3	2;1	2;1	2;1	Insulin-degrading enzyme	IDE	sp|P14735|IDE_HUMAN Insulin-degrading enzyme OS=Homo sapiens GN=IDE PE=1 SV=4;tr|Q5T5N3|Q5T5N3_HUMAN Insulin-degrading enzyme (Fragment) OS=Homo sapiens GN=IDE PE=1 SV=1	2	2	2	2	1	1	2	1	1	2	1	1	1	1	1	2	1	1	2	1	1	1	1	1	2	1	1	2	1	1	1	2.9	2.9	2.9	117.97	1019	1019;257	0	3.0526	By matching	By MS/MS	By MS/MS
P14868;H7BZ35;C9J7S3;C9JLC1	P14868;H7BZ35	5;3;1;1	5;3;1;1	5;3;1;1	Aspartate--tRNA ligase, cytoplasmic	DARS	sp|P14868|SYDC_HUMAN Aspartate--tRNA ligase, cytoplasmic OS=Homo sapiens GN=DARS PE=1 SV=2;tr|H7BZ35|H7BZ35_HUMAN Aspartate--tRNA ligase, cytoplasmic (Fragment) OS=Homo sapiens GN=DARS PE=1 SV=1	4	5	5	5	1	1	5	3	2	3	2	3	2	1	1	5	3	2	3	2	3	2	1	1	5	3	2	3	2	3	2	13.4	13.4	13.4	57.136	501	501;188;176;182	0	10.445	By MS/MS	By matching	By MS/MS
P14923;C9J826;C9JK18;C9JKY1;C9JTX4;B4DGU4;P35222	P14923	14;4;4;4;3;1;1	14;4;4;4;3;1;1	14;4;4;4;3;1;1	Junction plakoglobin	JUP	sp|P14923|PLAK_HUMAN Junction plakoglobin OS=Homo sapiens GN=JUP PE=1 SV=3	7	14	14	14	8	11	8	10	11	11	13	11	10	8	11	8	10	11	11	13	11	10	8	11	8	10	11	11	13	11	10	22.4	22.4	22.4	81.744	745	745;277;296;298;235;774;781	0	40.42	By MS/MS	By MS/MS	By MS/MS
P15121;E9PCX2;E9PEF9;C9JRZ8	P15121;E9PCX2	3;2;1;1	3;2;1;1	3;2;1;1	Aldose reductase	AKR1B1	sp|P15121|ALDR_HUMAN Aldose reductase OS=Homo sapiens GN=AKR1B1 PE=1 SV=3;tr|E9PCX2|E9PCX2_HUMAN Aldose reductase OS=Homo sapiens GN=AKR1B1 PE=1 SV=1	4	3	3	3	1	1	2	2	2	2	3	2	1	1	1	2	2	2	2	3	2	1	1	1	2	2	2	2	3	2	1	14.9	14.9	14.9	35.853	316	316;263;102;316	0	5.2638	By MS/MS	By matching	By matching
P15374;A0A087WTB8;Q5TBK7	P15374;A0A087WTB8;Q5TBK7	7;6;4	7;6;4	7;6;4	Ubiquitin carboxyl-terminal hydrolase isozyme L3;Ubiquitin carboxyl-terminal hydrolase	UCHL3	sp|P15374|UCHL3_HUMAN Ubiquitin carboxyl-terminal hydrolase isozyme L3 OS=Homo sapiens GN=UCHL3 PE=1 SV=1;tr|A0A087WTB8|A0A087WTB8_HUMAN Ubiquitin carboxyl-terminal hydrolase OS=Homo sapiens GN=UCHL3 PE=1 SV=1;tr|Q5TBK7|Q5TBK7_HUMAN Ubiquitin carboxyl-term	3	7	7	7	6	6	5	7	6	6	5	6	5	6	6	5	7	6	6	5	6	5	6	6	5	7	6	6	5	6	5	47.8	47.8	47.8	26.182	230	230;194;228	0	23.592	By MS/MS	By MS/MS	By MS/MS
P15531	P15531	6	1	1	Nucleoside diphosphate kinase A	NME1	sp|P15531|NDKA_HUMAN Nucleoside diphosphate kinase A OS=Homo sapiens GN=NME1 PE=1 SV=1	1	6	1	1	5	5	6	6	5	6	5	6	5	1	1	1	1	1	1	1	1	1	1	1	1	1	1	1	1	1	1	46.1	9.2	9.2	17.149	152	152	0	6.8715	By MS/MS	By MS/MS	By MS/MS
P15880;H0YEN5;E9PQD7;E9PMM9;I3L404;E9PPT0;E9PM36;H3BNG3;H0YE27	P15880;H0YEN5;E9PQD7;E9PMM9	9;8;7;5;4;4;4;1;1	9;8;7;5;4;4;4;1;1	9;8;7;5;4;4;4;1;1	40S ribosomal protein S2	RPS2	sp|P15880|RS2_HUMAN 40S ribosomal protein S2 OS=Homo sapiens GN=RPS2 PE=1 SV=2;tr|H0YEN5|H0YEN5_HUMAN 40S ribosomal protein S2 (Fragment) OS=Homo sapiens GN=RPS2 PE=1 SV=1;tr|E9PQD7|E9PQD7_HUMAN 40S ribosomal protein S2 OS=Homo sapiens GN=RPS2 PE=1 SV=1;tr	9	9	9	9	8	9	9	9	8	9	8	9	8	8	9	9	9	8	9	8	9	8	8	9	9	9	8	9	8	9	8	35.8	35.8	35.8	31.324	293	293;195;235;218;155;197;209;44;63	0	50.551	By MS/MS	By MS/MS	By MS/MS
P15924	P15924	75	75	75	Desmoplakin	DSP	sp|P15924|DESP_HUMAN Desmoplakin OS=Homo sapiens GN=DSP PE=1 SV=3	1	75	75	75	62	64	65	58	60	62	70	66	61	62	64	65	58	60	62	70	66	61	62	64	65	58	60	62	70	66	61	29.2	29.2	29.2	331.77	2871	2871	0	247.35	By MS/MS	By MS/MS	By MS/MS
P16152;E9PQ63;A8MTM1;O75828	P16152;E9PQ63;A8MTM1;O75828	3;2;2;2	3;2;2;2	3;2;2;2	Carbonyl reductase [NADPH] 1;Carbonyl reductase [NADPH] 3	CBR1;CBR3	sp|P16152|CBR1_HUMAN Carbonyl reductase [NADPH] 1 OS=Homo sapiens GN=CBR1 PE=1 SV=3;tr|E9PQ63|E9PQ63_HUMAN Carbonyl reductase [NADPH] 1 OS=Homo sapiens GN=CBR1 PE=1 SV=1;tr|A8MTM1|A8MTM1_HUMAN Carbonyl reductase [NADPH] 1 OS=Homo sapiens GN=CBR1 PE=1 SV=1;	4	3	3	3	0	1	2	0	1	1	1	2	1	0	1	2	0	1	1	1	2	1	0	1	2	0	1	1	1	2	1	15.9	15.9	15.9	30.375	277	277;178;222;277	0	10.975		By MS/MS	By MS/MS
P16403	P16403	7	1	1	Histone H1.2	HIST1H1C	sp|P16403|H12_HUMAN Histone H1.2 OS=Homo sapiens GN=HIST1H1C PE=1 SV=2	1	7	1	1	7	6	7	6	7	6	7	7	7	1	1	1	1	1	1	1	1	1	1	1	1	1	1	1	1	1	1	30.5	7.5	7.5	21.364	213	213	0	5.4199	By MS/MS	By MS/MS	By MS/MS
P16615;H7C5W9;O14983;Q93084	P16615;H7C5W9;O14983;Q93084	2;1;1;1	2;1;1;1	2;1;1;1	Sarcoplasmic/endoplasmic reticulum calcium ATPase 2;Sarcoplasmic/endoplasmic reticulum calcium ATPase 1;Sarcoplasmic/endoplasmic reticulum calcium ATPase 3	ATP2A2;ATP2A1;ATP2A3	sp|P16615|AT2A2_HUMAN Sarcoplasmic/endoplasmic reticulum calcium ATPase 2 OS=Homo sapiens GN=ATP2A2 PE=1 SV=1;tr|H7C5W9|H7C5W9_HUMAN Sarcoplasmic/endoplasmic reticulum calcium ATPase 2 (Fragment) OS=Homo sapiens GN=ATP2A2 PE=1 SV=1;sp|O14983|AT2A1_HUMAN Sa	4	2	2	2	0	1	2	1	2	0	0	2	1	0	1	2	1	2	0	0	2	1	0	1	2	1	2	0	0	2	1	2.9	2.9	2.9	114.76	1042	1042;933;1001;1043	0	3.5632		By matching	By MS/MS
P16949;A2A2D0;A0A0J9YXY4;E5RIR6;A0A0J9YW36;E7EVN3;REV__B5MD58;REV__P36956;Q9NZ72;Q9H169;H7BZ55	P16949;A2A2D0	8;7;1;1;1;1;1;1;1;1;1	8;7;1;1;1;1;1;1;1;1;1	6;5;0;0;0;0;0;0;0;0;0	Stathmin	STMN1	sp|P16949|STMN1_HUMAN Stathmin OS=Homo sapiens GN=STMN1 PE=1 SV=3;tr|A2A2D0|A2A2D0_HUMAN Stathmin (Fragment) OS=Homo sapiens GN=STMN1 PE=1 SV=7	11	8	8	6	6	7	7	7	7	8	7	7	8	6	7	7	7	7	8	7	7	8	5	5	5	5	5	6	6	5	6	55	55	44.3	17.302	149	149;86;86;231;239;258;893;1147;180;189;1655	0	29.908	By MS/MS	By MS/MS	By MS/MS
P16989;A0A0D9SEI8	P16989	8;3	5;1	5;1	Y-box-binding protein 3	YBX3	sp|P16989|YBOX3_HUMAN Y-box-binding protein 3 OS=Homo sapiens GN=YBX3 PE=1 SV=4	2	8	5	5	7	7	7	7	7	7	7	7	7	4	4	4	4	4	4	5	4	4	4	4	4	4	4	4	5	4	4	28.5	18.8	18.8	40.089	372	372;92	0	21.79	By MS/MS	By MS/MS	By MS/MS
P17066;P48741	P17066;P48741	8;5	1;1	1;1	Heat shock 70 kDa protein 6;Putative heat shock 70 kDa protein 7	HSPA6;HSPA7	sp|P17066|HSP76_HUMAN Heat shock 70 kDa protein 6 OS=Homo sapiens GN=HSPA6 PE=1 SV=2;sp|P48741|HSP77_HUMAN Putative heat shock 70 kDa protein 7 OS=Homo sapiens GN=HSPA7 PE=5 SV=2	2	8	1	1	8	8	8	8	8	8	8	8	8	1	1	1	1	1	1	1	1	1	1	1	1	1	1	1	1	1	1	14	1.7	1.7	71.027	643	643;367	0	3.944	By MS/MS	By MS/MS	By MS/MS
P17096	P17096	2	2	2	High mobility group protein HMG-I/HMG-Y	HMGA1	sp|P17096|HMGA1_HUMAN High mobility group protein HMG-I/HMG-Y OS=Homo sapiens GN=HMGA1 PE=1 SV=3	1	2	2	2	2	2	2	2	2	2	2	2	2	2	2	2	2	2	2	2	2	2	2	2	2	2	2	2	2	2	2	23.4	23.4	23.4	11.676	107	107	0	7.5051	By MS/MS	By MS/MS	By MS/MS
P17480	P17480	46	46	4	Nucleolar transcription factor 1	UBTF	sp|P17480|UBF1_HUMAN Nucleolar transcription factor 1 OS=Homo sapiens GN=UBTF PE=1 SV=1	1	46	46	4	45	46	44	45	45	45	44	45	44	45	46	44	45	45	45	44	45	44	4	4	4	4	3	4	4	4	4	53.4	53.4	3.1	89.405	764	764	0	323.31	By MS/MS	By MS/MS	By MS/MS
P17812;Q9NRF8	P17812	14;2	14;2	14;2	CTP synthase 1	CTPS1	sp|P17812|PYRG1_HUMAN CTP synthase 1 OS=Homo sapiens GN=CTPS1 PE=1 SV=2	2	14	14	14	8	9	11	12	13	10	10	12	12	8	9	11	12	13	10	10	12	12	8	9	11	12	13	10	10	12	12	28.3	28.3	28.3	66.69	591	591;586	0	36.966	By MS/MS	By MS/MS	By MS/MS
P17987;F5H282;E7EQR6;F5GZ03;E7ERF2;F5GYL4;F5GZI8	P17987;F5H282;E7EQR6;F5GZ03;E7ERF2	7;6;6;4;4;1;1	7;6;6;4;4;1;1	7;6;6;4;4;1;1	T-complex protein 1 subunit alpha	TCP1	sp|P17987|TCPA_HUMAN T-complex protein 1 subunit alpha OS=Homo sapiens GN=TCP1 PE=1 SV=1;tr|F5H282|F5H282_HUMAN T-complex protein 1 subunit alpha OS=Homo sapiens GN=TCP1 PE=1 SV=1;tr|E7EQR6|E7EQR6_HUMAN T-complex protein 1 subunit alpha OS=Homo sapiens GN=	7	7	7	7	5	6	6	5	4	4	5	6	5	5	6	6	5	4	4	5	6	5	5	6	6	5	4	4	5	6	5	14.4	14.4	14.4	60.343	556	556;332;401;221;433;65;100	0	26.907	By MS/MS	By MS/MS	By MS/MS
P18085;C9JAK5;C9JPM4;U3KQF2	P18085;C9JAK5;C9JPM4;U3KQF2	7;6;5;4	7;6;5;4	5;5;3;4	ADP-ribosylation factor 4	ARF4	sp|P18085|ARF4_HUMAN ADP-ribosylation factor 4 OS=Homo sapiens GN=ARF4 PE=1 SV=3;tr|C9JAK5|C9JAK5_HUMAN ADP-ribosylation factor 4 OS=Homo sapiens GN=ARF4 PE=1 SV=1;tr|C9JPM4|C9JPM4_HUMAN ADP-ribosylation factor 4 (Fragment) OS=Homo sapiens GN=ARF4 PE=1 SV=	4	7	7	5	5	3	7	4	5	4	5	7	5	5	3	7	4	5	4	5	7	5	4	2	5	3	3	3	3	5	3	43.9	43.9	27.8	20.511	180	180;153;127;71	0	24.192	By MS/MS	By MS/MS	By MS/MS
P18124;A8MUD9;C9JIJ5;C9JZ88	P18124;A8MUD9	12;11;4;3	12;11;4;3	12;11;4;3	60S ribosomal protein L7	RPL7	sp|P18124|RL7_HUMAN 60S ribosomal protein L7 OS=Homo sapiens GN=RPL7 PE=1 SV=1;tr|A8MUD9|A8MUD9_HUMAN 60S ribosomal protein L7 OS=Homo sapiens GN=RPL7 PE=1 SV=1	4	12	12	12	10	9	10	11	10	9	10	11	10	10	9	10	11	10	9	10	11	10	10	9	10	11	10	9	10	11	10	42.3	42.3	42.3	29.225	248	248;208;99;88	0	58.58	By MS/MS	By MS/MS	By MS/MS
Q5JQ13;P18206	Q5JQ13;P18206	4;4	4;4	4;4	Vinculin	VCL	tr|Q5JQ13|Q5JQ13_HUMAN Vinculin (Fragment) OS=Homo sapiens GN=VCL PE=1 SV=1;sp|P18206|VINC_HUMAN Vinculin OS=Homo sapiens GN=VCL PE=1 SV=4	2	4	4	4	1	3	2	1	1	1	1	2	3	1	3	2	1	1	1	1	2	3	1	3	2	1	1	1	1	2	3	5.7	5.7	5.7	87.443	806	806;1134	0	9.3476	By matching	By MS/MS	By MS/MS
P18583;J3QSZ5	P18583	35;16	35;16	10;2	Protein SON	SON	sp|P18583|SON_HUMAN Protein SON OS=Homo sapiens GN=SON PE=1 SV=4	2	35	35	10	28	31	31	31	22	32	23	30	27	28	31	31	31	22	32	23	30	27	7	7	7	8	4	7	7	8	6	22.3	22.3	5.9	263.83	2426	2426;454	0	146.48	By MS/MS	By MS/MS	By MS/MS
P18669;P15259;Q8N0Y7	P18669;P15259	9;5;3	9;5;3	9;5;3	Phosphoglycerate mutase 1;Phosphoglycerate mutase 2	PGAM1;PGAM2	sp|P18669|PGAM1_HUMAN Phosphoglycerate mutase 1 OS=Homo sapiens GN=PGAM1 PE=1 SV=2;sp|P15259|PGAM2_HUMAN Phosphoglycerate mutase 2 OS=Homo sapiens GN=PGAM2 PE=1 SV=3	3	9	9	9	8	8	9	9	9	9	9	9	8	8	8	9	9	9	9	9	9	8	8	8	9	9	9	9	9	9	8	44.5	44.5	44.5	28.804	254	254;253;254	0	68.675	By MS/MS	By MS/MS	By MS/MS
V9GY71;V9GYH5;V9GY63;P19174	V9GY71;V9GYH5;V9GY63;P19174	1;1;1;1	1;1;1;1	1;1;1;1	Phosphoinositide phospholipase C;1-phosphatidylinositol 4,5-bisphosphate phosphodiesterase gamma-1	PLCG1	tr|V9GY71|V9GY71_HUMAN 1-phosphatidylinositol 4,5-bisphosphate phosphodiesterase gamma-1 (Fragment) OS=Homo sapiens GN=PLCG1 PE=1 SV=1;tr|V9GYH5|V9GYH5_HUMAN 1-phosphatidylinositol 4,5-bisphosphate phosphodiesterase gamma-1 (Fragment) OS=Homo sapiens GN=PL	4	1	1	1	1	1	1	1	1	1	1	1	1	1	1	1	1	1	1	1	1	1	1	1	1	1	1	1	1	1	1	13.9	13.9	13.9	12.411	108	108;133;219;1290	0	3.1208	By MS/MS	By MS/MS	By matching
P19338;H7BY16;C9JYW2;C9JLB1;C9J1H7;C9JWL1	P19338;H7BY16	14;9;2;2;2;2	14;9;2;2;2;2	14;9;2;2;2;2	Nucleolin	NCL	sp|P19338|NUCL_HUMAN Nucleolin OS=Homo sapiens GN=NCL PE=1 SV=3;tr|H7BY16|H7BY16_HUMAN Nucleolin (Fragment) OS=Homo sapiens GN=NCL PE=1 SV=7	6	14	14	14	13	13	14	14	14	13	13	13	14	13	13	14	14	14	13	13	13	14	13	13	14	14	14	13	13	13	14	18.3	18.3	18.3	76.613	710	710;297;141;151;166;170	0	45.484	By MS/MS	By MS/MS	By MS/MS
P19525;F8WBH4;C9JZT2	P19525;F8WBH4;C9JZT2	2;1;1	2;1;1	2;1;1	Interferon-induced, double-stranded RNA-activated protein kinase	EIF2AK2	sp|P19525|E2AK2_HUMAN Interferon-induced, double-stranded RNA-activated protein kinase OS=Homo sapiens GN=EIF2AK2 PE=1 SV=2;tr|F8WBH4|F8WBH4_HUMAN Interferon-induced, double-stranded RNA-activated protein kinase (Fragment) OS=Homo sapiens GN=EIF2AK2 PE=1 S	3	2	2	2	0	0	1	1	0	0	0	2	2	0	0	1	1	0	0	0	2	2	0	0	1	1	0	0	0	2	2	3.6	3.6	3.6	62.094	551	551;102;141	0	3.3422			By matching
P20042	P20042	11	11	11	Eukaryotic translation initiation factor 2 subunit 2	EIF2S2	sp|P20042|IF2B_HUMAN Eukaryotic translation initiation factor 2 subunit 2 OS=Homo sapiens GN=EIF2S2 PE=1 SV=2	1	11	11	11	8	9	9	10	9	8	9	8	6	8	9	9	10	9	8	9	8	6	8	9	9	10	9	8	9	8	6	36	36	36	38.388	333	333	0	35.619	By MS/MS	By MS/MS	By MS/MS
P20073	P20073	3	3	3	Annexin A7	ANXA7	sp|P20073|ANXA7_HUMAN Annexin A7 OS=Homo sapiens GN=ANXA7 PE=1 SV=3	1	3	3	3	0	0	1	0	0	2	1	2	1	0	0	1	0	0	2	1	2	1	0	0	1	0	0	2	1	2	1	8.2	8.2	8.2	52.739	488	488	0	6.686			By MS/MS
P20290	P20290	1	1	1	Transcription factor BTF3	BTF3	sp|P20290|BTF3_HUMAN Transcription factor BTF3 OS=Homo sapiens GN=BTF3 PE=1 SV=1	1	1	1	1	1	1	1	1	1	1	1	1	1	1	1	1	1	1	1	1	1	1	1	1	1	1	1	1	1	1	1	13.6	13.6	13.6	22.168	206	206	0	3.4047	By matching	By matching	By MS/MS
P20618	P20618	3	3	3	Proteasome subunit beta type-1	PSMB1	sp|P20618|PSB1_HUMAN Proteasome subunit beta type-1 OS=Homo sapiens GN=PSMB1 PE=1 SV=2	1	3	3	3	3	3	3	3	1	2	3	3	2	3	3	3	3	1	2	3	3	2	3	3	3	3	1	2	3	3	2	19.9	19.9	19.9	26.489	241	241	0	6.664	By matching	By matching	By MS/MS
P21796;C9JI87	P21796;C9JI87	4;3	4;3	4;3	Voltage-dependent anion-selective channel protein 1	VDAC1	sp|P21796|VDAC1_HUMAN Voltage-dependent anion-selective channel protein 1 OS=Homo sapiens GN=VDAC1 PE=1 SV=2;tr|C9JI87|C9JI87_HUMAN Voltage-dependent anion-selective channel protein 1 (Fragment) OS=Homo sapiens GN=VDAC1 PE=1 SV=5	2	4	4	4	3	2	4	4	1	2	4	4	3	3	2	4	4	1	2	4	4	3	3	2	4	4	1	2	4	4	3	14.8	14.8	14.8	30.772	283	283;184	0	14.142	By MS/MS	By MS/MS	By MS/MS
P22102;C9JBJ1;C9JTV6;F8WD69;C9JZG2;C9JKQ7;H7C366	P22102;C9JBJ1;C9JTV6;F8WD69;C9JZG2;C9JKQ7	7;5;5;5;4;4;1	7;5;5;5;4;4;1	7;5;5;5;4;4;1	Trifunctional purine biosynthetic protein adenosine-3;Phosphoribosylamine--glycine ligase;Phosphoribosylformylglycinamidine cyclo-ligase;Phosphoribosylglycinamide formyltransferase	GART	sp|P22102|PUR2_HUMAN Trifunctional purine biosynthetic protein adenosine-3 OS=Homo sapiens GN=GART PE=1 SV=1;tr|C9JBJ1|C9JBJ1_HUMAN Trifunctional purine biosynthetic protein adenosine-3 (Fragment) OS=Homo sapiens GN=GART PE=1 SV=7;tr|C9JTV6|C9JTV6_HUMAN Tr	7	7	7	7	5	7	7	7	6	5	5	7	6	5	7	7	7	6	5	5	7	6	5	7	7	7	6	5	5	7	6	11.3	11.3	11.3	107.77	1010	1010;232;241;306;136;138;145	0	28.934	By MS/MS	By MS/MS	By MS/MS
P22314;Q5JRR9;Q5JRS0;Q5JRR6;Q5JRS1;Q5JRS3;Q5JRS2	P22314	13;4;4;4;3;3;3	13;4;4;4;3;3;3	13;4;4;4;3;3;3	Ubiquitin-like modifier-activating enzyme 1	UBA1	sp|P22314|UBA1_HUMAN Ubiquitin-like modifier-activating enzyme 1 OS=Homo sapiens GN=UBA1 PE=1 SV=3	7	13	13	13	9	9	12	12	13	9	11	11	10	9	9	12	12	13	9	11	11	10	9	9	12	12	13	9	11	11	10	16.8	16.8	16.8	117.85	1058	1058;271;284;506;173;195;234	0	59.282	By MS/MS	By MS/MS	By MS/MS
P35326;P35325;P22532;P22531;Q9BYE4;Q96RM1	P35326;P35325;P22532;P22531;Q9BYE4;Q96RM1	2;2;2;2;2;1	2;2;2;2;2;1	2;2;2;2;2;1	Small proline-rich protein 2A;Small proline-rich protein 2B;Small proline-rich protein 2D;Small proline-rich protein 2E;Small proline-rich protein 2G;Small proline-rich protein 2F	SPRR2A;SPRR2B;SPRR2D;SPRR2E;SPRR2G;SPRR2F	sp|P35326|SPR2A_HUMAN Small proline-rich protein 2A OS=Homo sapiens GN=SPRR2A PE=1 SV=1;sp|P35325|SPR2B_HUMAN Small proline-rich protein 2B OS=Homo sapiens GN=SPRR2B PE=2 SV=1;sp|P22532|SPR2D_HUMAN Small proline-rich protein 2D OS=Homo sapiens GN=SPRR2D PE	6	2	2	2	1	0	1	0	0	0	2	0	0	1	0	1	0	0	0	2	0	0	1	0	1	0	0	0	2	0	0	43.1	43.1	43.1	7.9653	72	72;72;72;72;73;72	0	4.2309	By matching		By MS/MS
P22626;A0A087WUI2	P22626;A0A087WUI2	10;8	9;7	9;7	Heterogeneous nuclear ribonucleoproteins A2/B1	HNRNPA2B1	sp|P22626|ROA2_HUMAN Heterogeneous nuclear ribonucleoproteins A2/B1 OS=Homo sapiens GN=HNRNPA2B1 PE=1 SV=2;tr|A0A087WUI2|A0A087WUI2_HUMAN Heterogeneous nuclear ribonucleoproteins A2/B1 OS=Homo sapiens GN=HNRNPA2B1 PE=1 SV=1	2	10	9	9	7	6	8	10	7	8	8	8	7	6	5	7	9	6	7	7	7	6	6	5	7	9	6	7	7	7	6	30.3	27.8	27.8	37.429	353	353;261	0	27.55	By MS/MS	By MS/MS	By MS/MS
P22735;H0YMQ8;H0YN27;H0YLT9	P22735	5;1;1;1	5;1;1;1	5;1;1;1	Protein-glutamine gamma-glutamyltransferase K	TGM1	sp|P22735|TGM1_HUMAN Protein-glutamine gamma-glutamyltransferase K OS=Homo sapiens GN=TGM1 PE=1 SV=4	4	5	5	5	2	4	2	2	2	2	5	2	0	2	4	2	2	2	2	5	2	0	2	4	2	2	2	2	5	2	0	8.4	8.4	8.4	89.786	817	817;128;135;209	0	12.519	By MS/MS	By MS/MS	By MS/MS
P23246;H0Y9K7;H0Y9U2	P23246	13;3;1	13;3;1	12;3;1	Splicing factor, proline- and glutamine-rich	SFPQ	sp|P23246|SFPQ_HUMAN Splicing factor, proline- and glutamine-rich OS=Homo sapiens GN=SFPQ PE=1 SV=2	3	13	13	12	11	8	13	13	8	10	10	13	10	11	8	13	13	8	10	10	13	10	10	7	12	12	7	9	9	12	9	24.8	24.8	23.6	76.149	707	707;223;88	0	41.993	By MS/MS	By MS/MS	By MS/MS
P23258;K7EKE5;K7EIS0;Q9NRH3	P23258;K7EKE5;K7EIS0;Q9NRH3	2;1;1;1	2;1;1;1	2;1;1;1	Tubulin gamma-1 chain;Tubulin gamma chain;Tubulin gamma-2 chain	TUBG1;TUBG2	sp|P23258|TBG1_HUMAN Tubulin gamma-1 chain OS=Homo sapiens GN=TUBG1 PE=1 SV=2;tr|K7EKE5|K7EKE5_HUMAN Tubulin gamma-1 chain OS=Homo sapiens GN=TUBG1 PE=4 SV=1;tr|K7EIS0|K7EIS0_HUMAN Tubulin gamma chain (Fragment) OS=Homo sapiens GN=TUBG1 PE=1 SV=1;sp|Q9NRH3	4	2	2	2	0	0	0	0	0	0	0	1	1	0	0	0	0	0	0	0	1	1	0	0	0	0	0	0	0	1	1	4.2	4.2	4.2	51.169	451	451;135;265;451	0	3.6794
P23284	P23284	5	5	5	Peptidyl-prolyl cis-trans isomerase B	PPIB	sp|P23284|PPIB_HUMAN Peptidyl-prolyl cis-trans isomerase B OS=Homo sapiens GN=PPIB PE=1 SV=2	1	5	5	5	2	3	4	4	1	1	2	5	3	2	3	4	4	1	1	2	5	3	2	3	4	4	1	1	2	5	3	26.4	26.4	26.4	23.742	216	216	0	16.351	By MS/MS	By MS/MS	By MS/MS
P23381;H0YJP3	P23381;H0YJP3	3;2	3;2	3;2	Tryptophan--tRNA ligase, cytoplasmic;T1-TrpRS;T2-TrpRS	WARS	sp|P23381|SYWC_HUMAN Tryptophan--tRNA ligase, cytoplasmic OS=Homo sapiens GN=WARS PE=1 SV=2;tr|H0YJP3|H0YJP3_HUMAN Tryptophan--tRNA ligase, cytoplasmic (Fragment) OS=Homo sapiens GN=WARS PE=1 SV=1	2	3	3	3	0	0	1	2	2	1	2	2	0	0	0	1	2	2	1	2	2	0	0	0	1	2	2	1	2	2	0	10	10	10	53.165	471	471;185	0	7.3892			By matching
P23396;E9PL09;E9PPU1;H0YEU2;F2Z2S8;H0YCJ7;H0YF32;E9PQ96;E9PSF4;E9PJH4;E9PK82;E9PQX2;H0YES8;E9PJN9	P23396;E9PL09;E9PPU1;H0YEU2;F2Z2S8;H0YCJ7	14;12;10;9;8;8;6;5;5;5;5;3;1;1	14;12;10;9;8;8;6;5;5;5;5;3;1;1	14;12;10;9;8;8;6;5;5;5;5;3;1;1	40S ribosomal protein S3	RPS3	sp|P23396|RS3_HUMAN 40S ribosomal protein S3 OS=Homo sapiens GN=RPS3 PE=1 SV=2;tr|E9PL09|E9PL09_HUMAN 40S ribosomal protein S3 OS=Homo sapiens GN=RPS3 PE=1 SV=1;tr|E9PPU1|E9PPU1_HUMAN 40S ribosomal protein S3 OS=Homo sapiens GN=RPS3 PE=1 SV=1;tr|H0YEU2|H0Y	14	14	14	14	13	11	14	12	13	12	11	12	12	13	11	14	12	13	12	11	12	12	13	11	14	12	13	12	11	12	12	64.6	64.6	64.6	26.688	243	243;231;158;171;117;135;123;91;103;115;128;44;33;36	0	48.125	By MS/MS	By MS/MS	By MS/MS
P23526	P23526	4	4	4	Adenosylhomocysteinase	AHCY	sp|P23526|SAHH_HUMAN Adenosylhomocysteinase OS=Homo sapiens GN=AHCY PE=1 SV=4	1	4	4	4	3	4	4	4	4	4	4	4	4	3	4	4	4	4	4	4	4	4	3	4	4	4	4	4	4	4	4	12.3	12.3	12.3	47.716	432	432	0	17.567	By MS/MS	By MS/MS	By MS/MS
P23528;E9PP50;G3V1A4;E9PK25;E9PQB7;E9PLJ3;E9PS23;Q9Y281	P23528;E9PP50;G3V1A4;E9PK25;E9PQB7;E9PLJ3;E9PS23	12;11;10;10;8;6;6;4	12;11;10;10;8;6;6;4	11;10;9;9;7;6;6;3	Cofilin-1	CFL1	sp|P23528|COF1_HUMAN Cofilin-1 OS=Homo sapiens GN=CFL1 PE=1 SV=3;tr|E9PP50|E9PP50_HUMAN Cofilin-1 (Fragment) OS=Homo sapiens GN=CFL1 PE=1 SV=7;tr|G3V1A4|G3V1A4_HUMAN Cofilin 1 (Non-muscle), isoform CRA_a OS=Homo sapiens GN=CFL1 PE=1 SV=1;tr|E9PK25|E9PK25_H	8	12	12	11	12	11	12	12	11	11	12	11	11	12	11	12	12	11	11	12	11	11	11	11	11	11	11	11	11	11	10	72.9	72.9	68.7	18.502	166	166;160;149;204;122;79;91;166	0	61.115	By MS/MS	By MS/MS	By MS/MS
P24534;C9JZW3;F8WF65;F2Z2G2	P24534	7;2;1;1	5;2;1;1	5;2;1;1	Elongation factor 1-beta	EEF1B2	sp|P24534|EF1B_HUMAN Elongation factor 1-beta OS=Homo sapiens GN=EEF1B2 PE=1 SV=3	4	7	5	5	7	7	7	7	6	7	7	7	6	5	5	5	5	4	5	5	5	5	5	5	5	5	4	5	5	5	5	39.6	31.6	31.6	24.763	225	225;123;29;68	0	32.892	By MS/MS	By MS/MS	By MS/MS
Q5QNZ2;P24539	Q5QNZ2;P24539	2;2	2;2	2;2	ATP synthase F(0) complex subunit B1, mitochondrial	ATP5F1	tr|Q5QNZ2|Q5QNZ2_HUMAN ATP synthase F(0) complex subunit B1, mitochondrial OS=Homo sapiens GN=ATP5F1 PE=1 SV=1;sp|P24539|AT5F1_HUMAN ATP synthase F(0) complex subunit B1, mitochondrial OS=Homo sapiens GN=ATP5F1 PE=1 SV=2	2	2	2	2	2	1	2	2	2	2	2	2	2	2	1	2	2	2	2	2	2	2	2	1	2	2	2	2	2	2	2	13.8	13.8	13.8	22.275	195	195;256	0	5.6936	By MS/MS	By matching	By MS/MS
P24752;H0YEL7;E9PRQ6	P24752	3;1;1	3;1;1	3;1;1	Acetyl-CoA acetyltransferase, mitochondrial	ACAT1	sp|P24752|THIL_HUMAN Acetyl-CoA acetyltransferase, mitochondrial OS=Homo sapiens GN=ACAT1 PE=1 SV=1	3	3	3	3	2	1	2	1	0	0	0	3	0	2	1	2	1	0	0	0	3	0	2	1	2	1	0	0	0	3	0	10.3	10.3	10.3	45.199	427	427;136;141	0	4.8317	By matching	By matching	By MS/MS
P25205;J3KQ69	P25205;J3KQ69	4;2	4;2	4;2	DNA replication licensing factor MCM3	MCM3	sp|P25205|MCM3_HUMAN DNA replication licensing factor MCM3 OS=Homo sapiens GN=MCM3 PE=1 SV=3;tr|J3KQ69|J3KQ69_HUMAN DNA replication licensing factor MCM3 OS=Homo sapiens GN=MCM3 PE=1 SV=2	2	4	4	4	3	1	4	3	1	4	1	2	2	3	1	4	3	1	4	1	2	2	3	1	4	3	1	4	1	2	2	5.2	5.2	5.2	90.98	808	808;818	0	8.7853	By MS/MS	By matching	By MS/MS
P25311;C9JEV0;H7BZJ8	P25311;C9JEV0	5;4;1	5;4;1	5;4;1	Zinc-alpha-2-glycoprotein	AZGP1	sp|P25311|ZA2G_HUMAN Zinc-alpha-2-glycoprotein OS=Homo sapiens GN=AZGP1 PE=1 SV=2;tr|C9JEV0|C9JEV0_HUMAN Zinc-alpha-2-glycoprotein OS=Homo sapiens GN=AZGP1 PE=1 SV=1	3	5	5	5	4	3	3	4	1	4	3	5	3	4	3	3	4	1	4	3	5	3	4	3	3	4	1	4	3	5	3	22.8	22.8	22.8	34.258	298	298;227;85	0	13.387	By MS/MS	By MS/MS	By MS/MS
P25398	P25398	1	1	1	40S ribosomal protein S12	RPS12	sp|P25398|RS12_HUMAN 40S ribosomal protein S12 OS=Homo sapiens GN=RPS12 PE=1 SV=3	1	1	1	1	1	1	1	1	1	1	1	1	1	1	1	1	1	1	1	1	1	1	1	1	1	1	1	1	1	1	1	6.1	6.1	6.1	14.515	132	132	0.0043215	2.5451	By MS/MS	By MS/MS	By MS/MS
P25705;K7EK77;K7ERX7;K7EJP1;K7EQH4;K7ENJ4;K7ESA0	P25705;K7EK77;K7ERX7;K7EJP1	10;7;6;5;4;4;1	10;7;6;5;4;4;1	10;7;6;5;4;4;1	ATP synthase subunit alpha, mitochondrial	ATP5A1	sp|P25705|ATPA_HUMAN ATP synthase subunit alpha, mitochondrial OS=Homo sapiens GN=ATP5A1 PE=1 SV=1;tr|K7EK77|K7EK77_HUMAN ATP synthase subunit alpha, mitochondrial (Fragment) OS=Homo sapiens GN=ATP5A1 PE=1 SV=1;tr|K7ERX7|K7ERX7_HUMAN ATP synthase subunit a	7	10	10	10	5	7	8	7	7	6	8	9	7	5	7	8	7	7	6	8	9	7	5	7	8	7	7	6	8	9	7	22.6	22.6	22.6	59.75	553	553;207;205;145;111;199;77	0	34.401	By MS/MS	By MS/MS	By MS/MS
P25786;F5GX11;B4DEV8	P25786;F5GX11	5;3;2	5;3;2	5;3;2	Proteasome subunit alpha type-1	PSMA1	sp|P25786|PSA1_HUMAN Proteasome subunit alpha type-1 OS=Homo sapiens GN=PSMA1 PE=1 SV=1;tr|F5GX11|F5GX11_HUMAN Proteasome subunit alpha type-1 OS=Homo sapiens GN=PSMA1 PE=1 SV=1	3	5	5	5	3	2	4	3	1	3	3	3	2	3	2	4	3	1	3	3	3	2	3	2	4	3	1	3	3	3	2	20.9	20.9	20.9	29.555	263	263;238;164	0	9.3274	By MS/MS	By matching	By MS/MS
P26038	P26038	9	4	4	Moesin	MSN	sp|P26038|MOES_HUMAN Moesin OS=Homo sapiens GN=MSN PE=1 SV=3	1	9	4	4	7	7	8	9	9	8	9	8	7	3	2	4	4	4	3	4	3	3	3	2	4	4	4	3	4	3	3	15.9	8	8	67.819	577	577	0	9.7118	By MS/MS	By matching	By MS/MS
P26196;Q8IV96	P26196;Q8IV96	3;2	3;2	3;2	Probable ATP-dependent RNA helicase DDX6	DDX6	sp|P26196|DDX6_HUMAN Probable ATP-dependent RNA helicase DDX6 OS=Homo sapiens GN=DDX6 PE=1 SV=2;tr|Q8IV96|Q8IV96_HUMAN DDX6 protein OS=Homo sapiens GN=DDX6 PE=1 SV=1	2	3	3	3	1	1	3	1	1	1	1	1	0	1	1	3	1	1	1	1	1	0	1	1	3	1	1	1	1	1	0	9.5	9.5	9.5	54.416	483	483;187	0	6.2682	By matching	By matching	By MS/MS
P26358;K7ENW7	P26358;K7ENW7	2;1	2;1	2;1	DNA (cytosine-5)-methyltransferase 1	DNMT1	sp|P26358|DNMT1_HUMAN DNA (cytosine-5)-methyltransferase 1 OS=Homo sapiens GN=DNMT1 PE=1 SV=2;tr|K7ENW7|K7ENW7_HUMAN DNA (cytosine-5)-methyltransferase 1 (Fragment) OS=Homo sapiens GN=DNMT1 PE=1 SV=1	2	2	2	2	1	0	0	1	0	0	0	0	0	1	0	0	1	0	0	0	0	0	1	0	0	1	0	0	0	0	0	1.7	1.7	1.7	183.16	1616	1616;389	0	3.1661	By MS/MS
P26368;K7ENG2;K7ELP8	P26368;K7ENG2	15;12;2	15;12;2	15;12;2	Splicing factor U2AF 65 kDa subunit	U2AF2	sp|P26368|U2AF2_HUMAN Splicing factor U2AF 65 kDa subunit OS=Homo sapiens GN=U2AF2 PE=1 SV=4;tr|K7ENG2|K7ENG2_HUMAN Splicing factor U2AF 65 kDa subunit OS=Homo sapiens GN=U2AF2 PE=1 SV=1	3	15	15	15	14	15	13	14	15	14	15	14	14	14	15	13	14	15	14	15	14	14	14	15	13	14	15	14	15	14	14	47.8	47.8	47.8	53.5	475	475;307;86	0	176.47	By MS/MS	By MS/MS	By MS/MS
P26373;J3QSB4;H3BTH3;J3KS98;H3BUK8	P26373;J3QSB4	10;6;2;2;1	10;6;2;2;1	10;6;2;2;1	60S ribosomal protein L13	RPL13	sp|P26373|RL13_HUMAN 60S ribosomal protein L13 OS=Homo sapiens GN=RPL13 PE=1 SV=4;tr|J3QSB4|J3QSB4_HUMAN 60S ribosomal protein L13 (Fragment) OS=Homo sapiens GN=RPL13 PE=1 SV=1	5	10	10	10	10	10	10	10	10	10	10	8	10	10	10	10	10	10	10	10	8	10	10	10	10	10	10	10	10	8	10	46.9	46.9	46.9	24.261	211	211;126;63;78;54	0	79.175	By MS/MS	By MS/MS	By MS/MS
P26583;D6R9A6	P26583;D6R9A6	6;5	5;4	5;4	High mobility group protein B2	HMGB2	sp|P26583|HMGB2_HUMAN High mobility group protein B2 OS=Homo sapiens GN=HMGB2 PE=1 SV=2;tr|D6R9A6|D6R9A6_HUMAN High mobility group protein B2 (Fragment) OS=Homo sapiens GN=HMGB2 PE=1 SV=1	2	6	5	5	6	6	4	6	6	6	5	6	6	5	5	4	5	5	5	4	5	5	5	5	4	5	5	5	4	5	5	27.8	22	22	24.033	209	209;134	0	24.246	By MS/MS	By MS/MS	By MS/MS
P26639;D6RCA5;D6R9F8;D6RDJ6;D6RBR8;B7ZLP8;A2RTX5;D6RJ97;D6RHV7;D6RCS6	P26639	25;4;4;4;3;2;2;1;1;1	25;4;4;4;3;2;2;1;1;1	25;4;4;4;3;2;2;1;1;1	Threonine--tRNA ligase, cytoplasmic	TARS	sp|P26639|SYTC_HUMAN Threonine--tRNA ligase, cytoplasmic OS=Homo sapiens GN=TARS PE=1 SV=3	10	25	25	25	21	19	23	21	22	22	23	22	19	21	19	23	21	22	22	23	22	19	21	19	23	21	22	22	23	22	19	41.4	41.4	41.4	83.434	723	723;118;129;131;50;766;802;55;56;66	0	105.8	By MS/MS	By MS/MS	By MS/MS
P26640;A0A140T936;A0A140T954;A2ABF4;A0A0G2JJT9;A0A140T904;H0Y426	P26640;A0A140T936;A0A140T954	9;8;5;3;3;2;1	9;8;5;3;3;2;1	9;8;5;3;3;2;1	Valine--tRNA ligase	VARS	sp|P26640|SYVC_HUMAN Valine--tRNA ligase OS=Homo sapiens GN=VARS PE=1 SV=4;tr|A0A140T936|A0A140T936_HUMAN Valine--tRNA ligase (Fragment) OS=Homo sapiens GN=VARS PE=1 SV=1;tr|A0A140T954|A0A140T954_HUMAN Valine--tRNA ligase (Fragment) OS=Homo sapiens GN=VARS	7	9	9	9	6	6	7	5	7	6	6	5	6	6	6	7	5	7	6	6	5	6	6	6	7	5	7	6	6	5	6	9	9	9	140.47	1264	1264;1183;366;174;174;95;288	0	20.119	By MS/MS	By MS/MS	By MS/MS
P26641	P26641	15	15	15	Elongation factor 1-gamma	EEF1G	sp|P26641|EF1G_HUMAN Elongation factor 1-gamma OS=Homo sapiens GN=EEF1G PE=1 SV=3	1	15	15	15	13	11	13	12	12	12	11	14	12	13	11	13	12	12	12	11	14	12	13	11	13	12	12	12	11	14	12	33	33	33	50.118	437	437	0	50.319	By MS/MS	By MS/MS	By MS/MS
P27348;E9PG15	P27348;E9PG15	14;8	9;6	9;6	14-3-3 protein theta	YWHAQ	sp|P27348|1433T_HUMAN 14-3-3 protein theta OS=Homo sapiens GN=YWHAQ PE=1 SV=1;tr|E9PG15|E9PG15_HUMAN 14-3-3 protein theta (Fragment) OS=Homo sapiens GN=YWHAQ PE=1 SV=1	2	14	9	9	14	14	14	13	13	14	14	14	14	9	9	9	9	8	9	9	9	9	9	9	9	9	8	9	9	9	9	53.5	39.2	39.2	27.764	245	245;149	0	101.29	By MS/MS	By MS/MS	By MS/MS
P27797;K7EJB9;K7EL50	P27797;K7EJB9	4;2;1	4;2;1	4;2;1	Calreticulin	CALR	sp|P27797|CALR_HUMAN Calreticulin OS=Homo sapiens GN=CALR PE=1 SV=1;tr|K7EJB9|K7EJB9_HUMAN Calreticulin (Fragment) OS=Homo sapiens GN=CALR PE=1 SV=1	3	4	4	4	3	3	4	3	3	2	4	3	4	3	3	4	3	3	2	4	3	4	3	3	4	3	3	2	4	3	4	14.1	14.1	14.1	48.141	417	417;247;163	0	12.779	By matching	By MS/MS	By MS/MS
P27824;D6RGY2;H0Y9Q7;D6RAU8;D6RB85;D6RDP7;D6RAQ8;D6RHJ3;D6RD16;D6RFL1;H0Y9H1	P27824	15;5;4;3;3;3;2;1;1;1;1	15;5;4;3;3;3;2;1;1;1;1	15;5;4;3;3;3;2;1;1;1;1	Calnexin	CANX	sp|P27824|CALX_HUMAN Calnexin OS=Homo sapiens GN=CANX PE=1 SV=2	11	15	15	15	13	13	13	14	14	14	13	14	14	13	13	13	14	14	14	13	14	14	13	13	13	14	14	14	13	14	14	26.9	26.9	26.9	67.567	592	592;308;170;134;144;168;107;79;96;131;190	0	58.43	By MS/MS	By MS/MS	By MS/MS
P27986;H0YBC2;E5RJY0;H0YB27;E5RGI8;E5RHI0	P27986	21;8;7;3;2;1	21;8;7;3;2;1	18;6;5;3;2;1	Phosphatidylinositol 3-kinase regulatory subunit alpha	PIK3R1	sp|P27986|P85A_HUMAN Phosphatidylinositol 3-kinase regulatory subunit alpha OS=Homo sapiens GN=PIK3R1 PE=1 SV=2	6	21	21	18	17	16	20	18	19	20	19	20	20	17	16	20	18	19	20	19	20	20	14	13	17	15	16	17	16	17	17	31.8	31.8	27.6	83.597	724	724;189;137;132;117;102	0	71.8	By MS/MS	By MS/MS	By MS/MS
P28066	P28066	5	5	5	Proteasome subunit alpha type-5	PSMA5	sp|P28066|PSA5_HUMAN Proteasome subunit alpha type-5 OS=Homo sapiens GN=PSMA5 PE=1 SV=3	1	5	5	5	3	4	4	4	3	3	4	5	4	3	4	4	4	3	3	4	5	4	3	4	4	4	3	3	4	5	4	26.1	26.1	26.1	26.411	241	241	0	18.344	By matching	By MS/MS	By MS/MS
P28074;H0YJM8	P28074;H0YJM8	2;1	2;1	2;1	Proteasome subunit beta type-5	PSMB5	sp|P28074|PSB5_HUMAN Proteasome subunit beta type-5 OS=Homo sapiens GN=PSMB5 PE=1 SV=3;tr|H0YJM8|H0YJM8_HUMAN Proteasome subunit beta type-5 (Fragment) OS=Homo sapiens GN=PSMB5 PE=1 SV=1	2	2	2	2	2	2	2	2	1	2	2	2	2	2	2	2	2	1	2	2	2	2	2	2	2	2	1	2	2	2	2	8.4	8.4	8.4	28.48	263	263;118	0	5.8786	By MS/MS	By MS/MS	By MS/MS
P29401;A0A0B4J1R6;E9PFF2;F8W888	P29401;A0A0B4J1R6	9;8;4;1	9;8;4;1	9;8;4;1	Transketolase	TKT	sp|P29401|TKT_HUMAN Transketolase OS=Homo sapiens GN=TKT PE=1 SV=3;tr|A0A0B4J1R6|A0A0B4J1R6_HUMAN Transketolase OS=Homo sapiens GN=TKT PE=1 SV=1	4	9	9	9	6	5	8	6	4	5	6	7	6	6	5	8	6	4	5	6	7	6	6	5	8	6	4	5	6	7	6	20.5	20.5	20.5	67.877	623	623;457;334;153	0	46.786	By MS/MS	By MS/MS	By MS/MS
Q5K684;P29508;C9JZ65;H0Y5H9;P48594	Q5K684;P29508;C9JZ65;H0Y5H9;P48594	4;4;2;2;2	4;4;2;2;2	4;4;2;2;2	Serpin B3;Serpin B4	SERPINB3;SERPINB4	tr|Q5K684|Q5K684_HUMAN SCCA1/SCCA2 fusion protein OS=Homo sapiens GN=SERPINB3 PE=1 SV=1;sp|P29508|SPB3_HUMAN Serpin B3 OS=Homo sapiens GN=SERPINB3 PE=1 SV=2;tr|C9JZ65|C9JZ65_HUMAN Serpin B4 (Fragment) OS=Homo sapiens GN=SERPINB4 PE=1 SV=1;tr|H0Y5H9|H0Y5H9_	5	4	4	4	3	4	2	1	2	0	3	4	2	3	4	2	1	2	0	3	4	2	3	4	2	1	2	0	3	4	2	13.1	13.1	13.1	44.769	390	390;390;211;371;390	0	9.6638	By MS/MS	By MS/MS	By MS/MS
P29692;E9PK01;E9PRY8;E9PQZ1;E9PQ49;E9PI39;A0A087X1X7;E9PPR1;E9PL12;E9PL71;E9PMW7;H0YE72;E9PN91;H0YE58;E9PIZ1;E9PK06;H0YCK7;E9PKK3;E9PK72;E9PNW6;E9PQC9;E9PJD0	P29692;E9PK01;E9PRY8;E9PQZ1;E9PQ49;E9PI39;A0A087X1X7;E9PPR1;E9PL12;E9PL71	9;8;8;7;6;6;6;5;5;5;4;4;3;3;3;3;3;2;2;1;1;1	9;8;8;7;6;6;6;5;5;5;4;4;3;3;3;3;3;2;2;1;1;1	7;6;6;5;5;5;5;5;5;4;4;2;3;1;3;3;3;2;2;1;1;1	Elongation factor 1-delta	EEF1D	sp|P29692|EF1D_HUMAN Elongation factor 1-delta OS=Homo sapiens GN=EEF1D PE=1 SV=5;tr|E9PK01|E9PK01_HUMAN Elongation factor 1-delta (Fragment) OS=Homo sapiens GN=EEF1D PE=1 SV=1;tr|E9PRY8|E9PRY8_HUMAN Elongation factor 1-delta OS=Homo sapiens GN=EEF1D PE=1	22	9	9	7	7	8	8	8	9	9	9	8	7	7	8	8	8	9	9	9	8	7	5	6	6	6	7	7	7	6	6	42	42	35.6	31.121	281	281;261;697;238;199;204;631;166;168;187;130;156;106;119;137;140;210;39;63;35;36;99	0	40.725	By MS/MS	By MS/MS	By MS/MS
P30041	P30041	10	10	10	Peroxiredoxin-6	PRDX6	sp|P30041|PRDX6_HUMAN Peroxiredoxin-6 OS=Homo sapiens GN=PRDX6 PE=1 SV=3	1	10	10	10	9	9	10	9	9	6	10	10	9	9	9	10	9	9	6	10	10	9	9	9	10	9	9	6	10	10	9	58	58	58	25.035	224	224	0	43.954	By MS/MS	By MS/MS	By MS/MS
P30050	P30050	5	5	5	60S ribosomal protein L12	RPL12	sp|P30050|RL12_HUMAN 60S ribosomal protein L12 OS=Homo sapiens GN=RPL12 PE=1 SV=1	1	5	5	5	4	5	5	5	4	3	4	5	5	4	5	5	5	4	3	4	5	5	4	5	5	5	4	3	4	5	5	44.8	44.8	44.8	17.818	165	165	0	45.71	By MS/MS	By MS/MS	By MS/MS
P30085;Q5T0D2	P30085;Q5T0D2	3;2	3;2	3;2	UMP-CMP kinase	CMPK1	sp|P30085|KCY_HUMAN UMP-CMP kinase OS=Homo sapiens GN=CMPK1 PE=1 SV=3;tr|Q5T0D2|Q5T0D2_HUMAN UMP-CMP kinase OS=Homo sapiens GN=CMPK1 PE=1 SV=1	2	3	3	3	2	3	2	3	3	3	3	3	3	2	3	2	3	3	3	3	3	3	2	3	2	3	3	3	3	3	3	16.3	16.3	16.3	22.222	196	196;169	0	8.4794	By MS/MS	By MS/MS	By MS/MS
P30086	P30086	9	9	9	Phosphatidylethanolamine-binding protein 1;Hippocampal cholinergic neurostimulating peptide	PEBP1	sp|P30086|PEBP1_HUMAN Phosphatidylethanolamine-binding protein 1 OS=Homo sapiens GN=PEBP1 PE=1 SV=3	1	9	9	9	9	9	9	9	9	9	9	9	9	9	9	9	9	9	9	9	9	9	9	9	9	9	9	9	9	9	9	71.7	71.7	71.7	21.057	187	187	0	71.944	By MS/MS	By MS/MS	By MS/MS
P30101	P30101	11	11	10	Protein disulfide-isomerase A3	PDIA3	sp|P30101|PDIA3_HUMAN Protein disulfide-isomerase A3 OS=Homo sapiens GN=PDIA3 PE=1 SV=4	1	11	11	10	4	4	8	7	4	2	4	8	4	4	4	8	7	4	2	4	8	4	3	3	7	6	3	2	3	7	3	31.5	31.5	29.5	56.782	505	505	0	26.9	By matching	By MS/MS	By MS/MS
P31153	P31153	1	1	1	S-adenosylmethionine synthase isoform type-2	MAT2A	sp|P31153|METK2_HUMAN S-adenosylmethionine synthase isoform type-2 OS=Homo sapiens GN=MAT2A PE=1 SV=1	1	1	1	1	1	1	1	1	1	1	1	1	1	1	1	1	1	1	1	1	1	1	1	1	1	1	1	1	1	1	1	3.8	3.8	3.8	43.66	395	395	0	4.315	By MS/MS	By MS/MS	By MS/MS
P31689	P31689	21	21	21	DnaJ homolog subfamily A member 1	DNAJA1	sp|P31689|DNJA1_HUMAN DnaJ homolog subfamily A member 1 OS=Homo sapiens GN=DNAJA1 PE=1 SV=2	1	21	21	21	21	21	20	20	21	19	21	21	21	21	21	20	20	21	19	21	21	21	21	21	20	20	21	19	21	21	21	56.2	56.2	56.2	44.868	397	397	0	221.51	By MS/MS	By MS/MS	By MS/MS
P31930	P31930	2	2	2	Cytochrome b-c1 complex subunit 1, mitochondrial	UQCRC1	sp|P31930|QCR1_HUMAN Cytochrome b-c1 complex subunit 1, mitochondrial OS=Homo sapiens GN=UQCRC1 PE=1 SV=3	1	2	2	2	0	0	1	0	0	0	0	1	0	0	0	1	0	0	0	0	1	0	0	0	1	0	0	0	0	1	0	4.6	4.6	4.6	52.645	480	480	0	3.7612			By MS/MS
P31939;H7C1S2;C9JLK0;F8WEF0	P31939	13;5;2;1	13;5;2;1	13;5;2;1	Bifunctional purine biosynthesis protein PURH;Phosphoribosylaminoimidazolecarboxamide formyltransferase;IMP cyclohydrolase	ATIC	sp|P31939|PUR9_HUMAN Bifunctional purine biosynthesis protein PURH OS=Homo sapiens GN=ATIC PE=1 SV=3	4	13	13	13	10	9	13	11	11	12	12	13	12	10	9	13	11	11	12	12	13	12	10	9	13	11	11	12	12	13	12	33.6	33.6	33.6	64.615	592	592;231;170;84	0	38.728	By MS/MS	By MS/MS	By MS/MS
P31944	P31944	5	5	5	Caspase-14;Caspase-14 subunit p17, mature form;Caspase-14 subunit p10, mature form;Caspase-14 subunit p20, intermediate form;Caspase-14 subunit p8, intermediate form	CASP14	sp|P31944|CASPE_HUMAN Caspase-14 OS=Homo sapiens GN=CASP14 PE=1 SV=2	1	5	5	5	4	5	4	4	3	4	4	4	3	4	5	4	4	3	4	4	4	3	4	5	4	4	3	4	4	4	3	24.4	24.4	24.4	27.679	242	242	0	17.7	By MS/MS	By MS/MS	By MS/MS
P31946;Q4VY20;Q4VY19;A0A0J9YWE8;A0A0J9YWZ2	P31946	9;3;3;3;2	4;1;1;1;1	4;1;1;1;1	14-3-3 protein beta/alpha;14-3-3 protein beta/alpha, N-terminally processed	YWHAB	sp|P31946|1433B_HUMAN 14-3-3 protein beta/alpha OS=Homo sapiens GN=YWHAB PE=1 SV=3	5	9	4	4	9	9	9	8	9	9	9	9	9	4	4	4	4	4	4	4	4	4	4	4	4	4	4	4	4	4	4	39.8	25.6	25.6	28.082	246	246;74;100;149;81	0	46.811	By MS/MS	By MS/MS	By MS/MS
P31947	P31947	4	1	1	14-3-3 protein sigma	SFN	sp|P31947|1433S_HUMAN 14-3-3 protein sigma OS=Homo sapiens GN=SFN PE=1 SV=1	1	4	1	1	4	4	4	3	4	4	4	4	4	1	1	1	1	1	1	1	1	1	1	1	1	1	1	1	1	1	1	13.3	3.2	3.2	27.774	248	248	0	3.1631	By MS/MS	By MS/MS	By MS/MS
P31948;F5H783;H0YGI8;F5GXD8	P31948	18;7;6;5	18;7;6;5	18;7;6;5	Stress-induced-phosphoprotein 1	STIP1	sp|P31948|STIP1_HUMAN Stress-induced-phosphoprotein 1 OS=Homo sapiens GN=STIP1 PE=1 SV=1	4	18	18	18	14	15	14	13	13	15	15	16	15	14	15	14	13	13	15	15	16	15	14	15	14	13	13	15	15	16	15	35.2	35.2	35.2	62.639	543	543;236;137;138	0	63.382	By MS/MS	By MS/MS	By MS/MS
P31949	P31949	5	5	5	Protein S100-A11;Protein S100-A11, N-terminally processed	S100A11	sp|P31949|S10AB_HUMAN Protein S100-A11 OS=Homo sapiens GN=S100A11 PE=1 SV=2	1	5	5	5	5	5	4	5	5	5	5	5	5	5	5	4	5	5	5	5	5	5	5	5	4	5	5	5	5	5	5	49.5	49.5	49.5	11.74	105	105	0	13.841	By MS/MS	By MS/MS	By MS/MS
P32119;A6NIW5	P32119;A6NIW5	4;2	3;2	3;2	Peroxiredoxin-2	PRDX2	sp|P32119|PRDX2_HUMAN Peroxiredoxin-2 OS=Homo sapiens GN=PRDX2 PE=1 SV=5;tr|A6NIW5|A6NIW5_HUMAN Peroxiredoxin 2, isoform CRA_a OS=Homo sapiens GN=PRDX2 PE=1 SV=2	2	4	3	3	4	3	4	2	2	4	4	4	2	3	3	3	2	1	3	3	3	1	3	3	3	2	1	3	3	3	1	23.7	18.2	18.2	21.892	198	198;136	0	6.9387	By MS/MS	By MS/MS	By MS/MS
P32969;D6RAN4;H0Y9V9;E7ESE0;H0Y9R4	P32969;D6RAN4;H0Y9V9;E7ESE0;H0Y9R4	6;5;5;4;3	6;5;5;4;3	6;5;5;4;3	60S ribosomal protein L9	RPL9	sp|P32969|RL9_HUMAN 60S ribosomal protein L9 OS=Homo sapiens GN=RPL9 PE=1 SV=1;tr|D6RAN4|D6RAN4_HUMAN 60S ribosomal protein L9 (Fragment) OS=Homo sapiens GN=RPL9 PE=1 SV=7;tr|H0Y9V9|H0Y9V9_HUMAN 60S ribosomal protein L9 (Fragment) OS=Homo sapiens GN=RPL9 P	5	6	6	6	4	5	6	6	3	4	5	6	6	4	5	6	6	3	4	5	6	6	4	5	6	6	3	4	5	6	6	32.3	32.3	32.3	21.863	192	192;182;189;166;91	0	22.765	By MS/MS	By MS/MS	By MS/MS
P33176;A0A0G2JMZ6;J3KNA1;O60282;Q12840;C9JWB9	P33176	16;4;4;4;4;1	16;4;4;4;4;1	16;4;4;4;4;1	Kinesin-1 heavy chain	KIF5B	sp|P33176|KINH_HUMAN Kinesin-1 heavy chain OS=Homo sapiens GN=KIF5B PE=1 SV=1	6	16	16	16	9	13	14	15	11	13	9	13	13	9	13	14	15	11	13	9	13	13	9	13	14	15	11	13	9	13	13	21.8	21.8	21.8	109.68	963	963;860;943;957;1032;76	0	54.274	By MS/MS	By MS/MS	By MS/MS
P33764	P33764	1	1	1	Protein S100-A3	S100A3	sp|P33764|S10A3_HUMAN Protein S100-A3 OS=Homo sapiens GN=S100A3 PE=1 SV=1	1	1	1	1	0	0	0	0	0	0	0	0	1	0	0	0	0	0	0	0	0	1	0	0	0	0	0	0	0	0	1	8.9	8.9	8.9	11.713	101	101	0	3.259
P33991;E5RG31	P33991;E5RG31	2;1	2;1	2;1	DNA replication licensing factor MCM4	MCM4	sp|P33991|MCM4_HUMAN DNA replication licensing factor MCM4 OS=Homo sapiens GN=MCM4 PE=1 SV=5;tr|E5RG31|E5RG31_HUMAN DNA helicase (Fragment) OS=Homo sapiens GN=MCM4 PE=1 SV=7	2	2	2	2	0	0	2	1	1	0	1	2	0	0	0	2	1	1	0	1	2	0	0	0	2	1	1	0	1	2	0	2.3	2.3	2.3	96.557	863	863;279	0	3.4509			By MS/MS
P34897;G3V2D2;G3V540;G3V5L0;G3V2Y4;G3V4W5;H0YIZ0;P34896	P34897;G3V2D2;G3V540;G3V5L0;G3V2Y4;G3V4W5;H0YIZ0;P34896	2;1;1;1;1;1;1;1	2;1;1;1;1;1;1;1	2;1;1;1;1;1;1;1	Serine hydroxymethyltransferase, mitochondrial;Serine hydroxymethyltransferase;Serine hydroxymethyltransferase, cytosolic	SHMT2;SHMT1	sp|P34897|GLYM_HUMAN Serine hydroxymethyltransferase, mitochondrial OS=Homo sapiens GN=SHMT2 PE=1 SV=3;tr|G3V2D2|G3V2D2_HUMAN Serine hydroxymethyltransferase, mitochondrial OS=Homo sapiens GN=SHMT2 PE=1 SV=1;tr|G3V540|G3V540_HUMAN Serine hydroxymethyltrans	8	2	2	2	1	1	2	1	1	0	1	1	0	1	1	2	1	1	0	1	1	0	1	1	2	1	1	0	1	1	0	4.6	4.6	4.6	55.992	504	504;52;192;215;234;237;264;483	0	4.6481	By matching	By matching	By MS/MS
P34932;A0A087WYC1;A0A087WTS8	P34932;A0A087WYC1	23;16;11	23;16;11	22;15;10	Heat shock 70 kDa protein 4	HSPA4	sp|P34932|HSP74_HUMAN Heat shock 70 kDa protein 4 OS=Homo sapiens GN=HSPA4 PE=1 SV=4;tr|A0A087WYC1|A0A087WYC1_HUMAN Heat shock 70 kDa protein 4 OS=Homo sapiens GN=HSPA4 PE=1 SV=1	3	23	23	22	20	17	19	19	19	21	21	21	19	20	17	19	19	19	21	21	21	19	19	16	18	18	18	20	20	20	19	36.1	36.1	34.2	94.33	840	840;699;475	0	119.03	By MS/MS	By MS/MS	By MS/MS
P35221;G3XAM7;P26232;E5RIB1;E5RHV7;E5RGY6;E5RG03;A0A0A0MRI5;E5RJL0;E5RIE0;E5RJ41;A0A0A0MTJ6;E5RFM3;C9IZ88;H0YBB8;E5RGY7	P35221;G3XAM7	14;13;5;4;3;3;3;3;2;2;2;2;1;1;1;1	14;13;5;4;3;3;3;3;2;2;2;2;1;1;1;1	14;13;5;4;3;3;3;3;2;2;2;2;1;1;1;1	Catenin alpha-1	CTNNA1	sp|P35221|CTNA1_HUMAN Catenin alpha-1 OS=Homo sapiens GN=CTNNA1 PE=1 SV=1;tr|G3XAM7|G3XAM7_HUMAN Catenin (Cadherin-associated protein), alpha 1, 102kDa, isoform CRA_a OS=Homo sapiens GN=CTNNA1 PE=1 SV=1	16	14	14	14	8	8	7	13	13	13	13	11	13	8	8	7	13	13	13	13	11	13	8	8	7	13	13	13	13	11	13	20	20	20	100.07	906	906;841;953;215;123;139;156;569;101;118;161;476;94;117;129;136	0	53.352	By MS/MS	By MS/MS	By MS/MS
P35241	P35241	7	2	2	Radixin	RDX	sp|P35241|RADI_HUMAN Radixin OS=Homo sapiens GN=RDX PE=1 SV=1	1	7	2	2	4	7	4	6	7	7	5	6	5	0	2	0	1	2	2	0	1	1	0	2	0	1	2	2	0	1	1	11.8	3.9	3.9	68.563	583	583	0	10.896	By matching	By matching	By matching
P35269;M0QXD6;M0R0R9;M0R0Z3	P35269;M0QXD6;M0R0R9	11;9;6;4	11;9;6;4	11;9;6;4	General transcription factor IIF subunit 1	GTF2F1	sp|P35269|T2FA_HUMAN General transcription factor IIF subunit 1 OS=Homo sapiens GN=GTF2F1 PE=1 SV=2;tr|M0QXD6|M0QXD6_HUMAN General transcription factor IIF subunit 1 (Fragment) OS=Homo sapiens GN=GTF2F1 PE=1 SV=1;tr|M0R0R9|M0R0R9_HUMAN General transcriptio	4	11	11	11	9	9	10	10	10	11	8	11	11	9	9	10	10	10	11	8	11	11	9	9	10	10	10	11	8	11	11	29.6	29.6	29.6	58.24	517	517;433;381;127	0	78.881	By MS/MS	By MS/MS	By MS/MS
P35527;CON__P35527;K7EQQ3	P35527;CON__P35527;K7EQQ3	35;34;19	35;34;19	34;33;19	Keratin, type I cytoskeletal 9	KRT9	sp|P35527|K1C9_HUMAN Keratin, type I cytoskeletal 9 OS=Homo sapiens GN=KRT9 PE=1 SV=3;;tr|K7EQQ3|K7EQQ3_HUMAN Keratin, type I cytoskeletal 9 OS=Homo sapiens GN=KRT9 PE=1 SV=1	3	35	35	34	31	34	33	32	32	32	34	32	34	31	34	33	32	32	32	34	32	34	30	33	32	31	31	31	33	31	33	67.1	67.1	67.1	62.064	623	623;623;390	0	323.31	By MS/MS	By MS/MS	By MS/MS
P35579;Q5BKV1;B1AH99;A0A087X0T3;P12883;P13535;Q9UKX3;Q9Y623;P13533;P12882;P11055;Q9UKX2;A7E2Y1	P35579	75;8;4;1;1;1;1;1;1;1;1;1;1	75;8;4;1;1;1;1;1;1;1;1;1;1	58;7;4;0;0;0;0;0;0;0;0;0;0	Myosin-9	MYH9	sp|P35579|MYH9_HUMAN Myosin-9 OS=Homo sapiens GN=MYH9 PE=1 SV=4	13	75	75	58	66	65	70	71	70	70	67	71	70	66	65	70	71	70	70	67	71	70	53	49	54	55	55	55	52	56	56	45.3	45.3	36.4	226.53	1960	1960;218;103;1982;1935;1937;1938;1939;1939;1939;1940;1941;1941	0	323.31	By MS/MS	By MS/MS	By MS/MS
P35580;E7ERA5	P35580	52;7	41;6	37;6	Myosin-10	MYH10	sp|P35580|MYH10_HUMAN Myosin-10 OS=Homo sapiens GN=MYH10 PE=1 SV=3	2	52	41	37	43	48	49	45	45	47	44	41	43	36	38	38	35	36	38	35	32	35	33	34	34	31	32	34	31	28	31	30.2	24.7	22.8	229	1976	1976;188	0	235.64	By MS/MS	By MS/MS	By MS/MS
P35606	P35606	1	1	1	Coatomer subunit beta	COPB2	sp|P35606|COPB2_HUMAN Coatomer subunit beta OS=Homo sapiens GN=COPB2 PE=1 SV=2	1	1	1	1	1	1	1	1	1	1	1	1	1	1	1	1	1	1	1	1	1	1	1	1	1	1	1	1	1	1	1	1.1	1.1	1.1	102.49	906	906	0.0035842	2.775	By matching	By matching	By MS/MS
P35659;B4DFG0;D6R9L5;D6RDA2;H0Y993	P35659;B4DFG0;D6R9L5	5;4;3;2;2	5;4;3;2;2	5;4;3;2;2	Protein DEK	DEK	sp|P35659|DEK_HUMAN Protein DEK OS=Homo sapiens GN=DEK PE=1 SV=1;tr|B4DFG0|B4DFG0_HUMAN Protein DEK OS=Homo sapiens GN=DEK PE=1 SV=1;tr|D6R9L5|D6R9L5_HUMAN Protein DEK (Fragment) OS=Homo sapiens GN=DEK PE=1 SV=1	5	5	5	5	4	4	4	4	4	4	3	5	4	4	4	4	4	4	4	3	5	4	4	4	4	4	4	4	3	5	4	16.3	16.3	16.3	42.674	375	375;347;151;122;156	0	18	By MS/MS	By MS/MS	By MS/MS
P35908;CON__P35908;H0YID6	P35908;CON__P35908	41;40;2	41;40;2	28;27;0	Keratin, type II cytoskeletal 2 epidermal	KRT2	sp|P35908|K22E_HUMAN Keratin, type II cytoskeletal 2 epidermal OS=Homo sapiens GN=KRT2 PE=1 SV=2;	3	41	41	28	39	40	40	41	40	41	41	41	38	39	40	40	41	40	41	41	41	38	26	27	27	28	27	28	28	28	26	76.7	76.7	61	65.432	639	639;645;119	0	323.31	By MS/MS	By MS/MS	By MS/MS
P36405	P36405	3	3	3	ADP-ribosylation factor-like protein 3	ARL3	sp|P36405|ARL3_HUMAN ADP-ribosylation factor-like protein 3 OS=Homo sapiens GN=ARL3 PE=1 SV=2	1	3	3	3	2	1	3	1	3	3	3	3	2	2	1	3	1	3	3	3	3	2	2	1	3	1	3	3	3	3	2	21.4	21.4	21.4	20.455	182	182	0	5.8732	By MS/MS	By matching	By matching
P36542	P36542	1	1	1	ATP synthase subunit gamma, mitochondrial	ATP5C1	sp|P36542|ATPG_HUMAN ATP synthase subunit gamma, mitochondrial OS=Homo sapiens GN=ATP5C1 PE=1 SV=1	1	1	1	1	1	0	1	1	0	0	1	1	1	1	0	1	1	0	0	1	1	1	1	0	1	1	0	0	1	1	1	4	4	4	32.996	298	298	0	4.2295	By MS/MS		By MS/MS
P36578;H3BM89;H3BTP7;H3BU31	P36578;H3BM89	18;13;7;6	18;13;7;6	18;13;7;6	60S ribosomal protein L4	RPL4	sp|P36578|RL4_HUMAN 60S ribosomal protein L4 OS=Homo sapiens GN=RPL4 PE=1 SV=5;tr|H3BM89|H3BM89_HUMAN 60S ribosomal protein L4 OS=Homo sapiens GN=RPL4 PE=1 SV=1	4	18	18	18	17	17	16	16	17	17	17	18	16	17	17	16	16	17	17	17	18	16	17	17	16	16	17	17	17	18	16	44.7	44.7	44.7	47.697	427	427;333;170;171	0	98.603	By MS/MS	By MS/MS	By MS/MS
P36871	P36871	3	3	3	Phosphoglucomutase-1	PGM1	sp|P36871|PGM1_HUMAN Phosphoglucomutase-1 OS=Homo sapiens GN=PGM1 PE=1 SV=3	1	3	3	3	2	1	3	3	2	2	1	2	2	2	1	3	3	2	2	1	2	2	2	1	3	3	2	2	1	2	2	6.6	6.6	6.6	61.448	562	562	0	5.8434	By matching	By matching	By MS/MS
P36915;A2AB27;A0A140T8Y2	P36915;A2AB27;A0A140T8Y2	12;6;6	12;6;6	12;6;6	Guanine nucleotide-binding protein-like 1	GNL1	sp|P36915|GNL1_HUMAN Guanine nucleotide-binding protein-like 1 OS=Homo sapiens GN=GNL1 PE=1 SV=2;tr|A2AB27|A2AB27_HUMAN Guanine nucleotide-binding protein-like 1 (Fragment) OS=Homo sapiens GN=GNL1 PE=1 SV=1;tr|A0A140T8Y2|A0A140T8Y2_HUMAN Guanine nucleotide	3	12	12	12	9	10	10	11	10	10	7	8	11	9	10	10	11	10	10	7	8	11	9	10	10	11	10	10	7	8	11	25.4	25.4	25.4	68.66	607	607;264;407	0	54.513	By MS/MS	By MS/MS	By MS/MS
X6RJP6;P37802	X6RJP6;P37802	8;8	8;8	8;8	Transgelin-2	TAGLN2	tr|X6RJP6|X6RJP6_HUMAN Transgelin-2 (Fragment) OS=Homo sapiens GN=TAGLN2 PE=1 SV=1;sp|P37802|TAGL2_HUMAN Transgelin-2 OS=Homo sapiens GN=TAGLN2 PE=1 SV=3	2	8	8	8	6	7	7	6	6	5	7	6	6	6	7	7	6	6	5	7	6	6	6	7	7	6	6	5	7	6	6	51.9	51.9	51.9	21.086	187	187;199	0	23.621	By MS/MS	By MS/MS	By MS/MS
P38117	P38117	2	2	2	Electron transfer flavoprotein subunit beta	ETFB	sp|P38117|ETFB_HUMAN Electron transfer flavoprotein subunit beta OS=Homo sapiens GN=ETFB PE=1 SV=3	1	2	2	2	2	2	2	2	1	2	1	2	1	2	2	2	2	1	2	1	2	1	2	2	2	2	1	2	1	2	1	8.6	8.6	8.6	27.843	255	255	0	6.8148	By MS/MS	By MS/MS	By MS/MS
P38606;C9JA17;C9JVW8	P38606;C9JA17;C9JVW8	2;1;1	2;1;1	2;1;1	V-type proton ATPase catalytic subunit A	ATP6V1A	sp|P38606|VATA_HUMAN V-type proton ATPase catalytic subunit A OS=Homo sapiens GN=ATP6V1A PE=1 SV=2;tr|C9JA17|C9JA17_HUMAN V-type proton ATPase catalytic subunit A (Fragment) OS=Homo sapiens GN=ATP6V1A PE=1 SV=7;tr|C9JVW8|C9JVW8_HUMAN V-type proton ATPase c	3	2	2	2	1	2	1	0	1	0	1	1	0	1	2	1	0	1	0	1	1	0	1	2	1	0	1	0	1	1	0	4.1	4.1	4.1	68.303	617	617;185;221	0.0035305	2.6807	By MS/MS	By matching	By matching
P38646;D6RJI2;D6RA73;H0Y8S0;H0YBG6	P38646	11;3;2;2;1	10;3;2;2;1	10;3;2;2;1	Stress-70 protein, mitochondrial	HSPA9	sp|P38646|GRP75_HUMAN Stress-70 protein, mitochondrial OS=Homo sapiens GN=HSPA9 PE=1 SV=2	5	11	10	10	7	7	11	8	5	5	3	10	7	6	6	10	7	4	4	2	9	6	6	6	10	7	4	4	2	9	6	18.7	17.7	17.7	73.68	679	679;95;62;102;163	0	29.661	By MS/MS	By MS/MS	By MS/MS
P38919;I3L3H2	P38919;I3L3H2	4;3	1;1	1;1	Eukaryotic initiation factor 4A-III;Eukaryotic initiation factor 4A-III, N-terminally processed	EIF4A3	sp|P38919|IF4A3_HUMAN Eukaryotic initiation factor 4A-III OS=Homo sapiens GN=EIF4A3 PE=1 SV=4;tr|I3L3H2|I3L3H2_HUMAN Eukaryotic initiation factor 4A-III (Fragment) OS=Homo sapiens GN=EIF4A3 PE=1 SV=1	2	4	1	1	4	2	4	2	3	3	3	4	3	1	1	1	1	1	1	1	1	1	1	1	1	1	1	1	1	1	1	9	3.2	3.2	46.871	411	411;125	0	6.6095	By matching	By matching	By matching
P39019;M0R2L9;A0A075B6E2;M0QXK4;M0QYF7;M0R140	P39019	7;3;3;3;3;3	7;3;3;3;3;3	7;3;3;3;3;3	40S ribosomal protein S19	RPS19	sp|P39019|RS19_HUMAN 40S ribosomal protein S19 OS=Homo sapiens GN=RPS19 PE=1 SV=2	6	7	7	7	6	5	6	6	6	7	7	7	4	6	5	6	6	6	7	7	7	4	6	5	6	6	6	7	7	7	4	44.1	44.1	44.1	16.06	145	145;71;71;76;100;102	0	27.952	By MS/MS	By MS/MS	By MS/MS
P39023;G5E9G0;B5MCW2;H7C422;H7C3M2;F8WCR1;Q92901	P39023;G5E9G0;B5MCW2;H7C422	17;15;10;10;8;4;2	17;15;10;10;8;4;2	17;15;10;10;8;4;2	60S ribosomal protein L3	RPL3	sp|P39023|RL3_HUMAN 60S ribosomal protein L3 OS=Homo sapiens GN=RPL3 PE=1 SV=2;tr|G5E9G0|G5E9G0_HUMAN 60S ribosomal protein L3 OS=Homo sapiens GN=RPL3 PE=1 SV=1;tr|B5MCW2|B5MCW2_HUMAN 60S ribosomal protein L3 (Fragment) OS=Homo sapiens GN=RPL3 PE=1 SV=1;tr	7	17	17	17	13	16	16	15	15	15	14	17	15	13	16	16	15	15	15	14	17	15	13	16	16	15	15	15	14	17	15	41.7	41.7	41.7	46.108	403	403;351;272;305;261;180;407	0	75.205	By MS/MS	By MS/MS	By MS/MS
P39748;I3L3E9;F5H1Y3	P39748;I3L3E9;F5H1Y3	6;3;3	6;3;3	6;3;3	Flap endonuclease 1	FEN1	sp|P39748|FEN1_HUMAN Flap endonuclease 1 OS=Homo sapiens GN=FEN1 PE=1 SV=1;tr|I3L3E9|I3L3E9_HUMAN Flap endonuclease 1 (Fragment) OS=Homo sapiens GN=FEN1 PE=1 SV=1;tr|F5H1Y3|F5H1Y3_HUMAN Flap endonuclease 1 (Fragment) OS=Homo sapiens GN=FEN1 PE=1 SV=1	3	6	6	6	5	5	6	6	5	5	5	5	3	5	5	6	6	5	5	5	5	3	5	5	6	6	5	5	5	5	3	24.2	24.2	24.2	42.592	380	380;154;165	0	30.125	By MS/MS	By MS/MS	By MS/MS
P40222	P40222	6	6	6	Alpha-taxilin	TXLNA	sp|P40222|TXLNA_HUMAN Alpha-taxilin OS=Homo sapiens GN=TXLNA PE=1 SV=3	1	6	6	6	5	4	5	4	4	4	5	6	4	5	4	5	4	4	4	5	6	4	5	4	5	4	4	4	5	6	4	15	15	15	61.89	546	546	0	18.128	By MS/MS	By MS/MS	By MS/MS
P40227	P40227	4	4	4	T-complex protein 1 subunit zeta	CCT6A	sp|P40227|TCPZ_HUMAN T-complex protein 1 subunit zeta OS=Homo sapiens GN=CCT6A PE=1 SV=3	1	4	4	4	1	2	3	2	1	1	2	3	1	1	2	3	2	1	1	2	3	1	1	2	3	2	1	1	2	3	1	8.9	8.9	8.9	58.024	531	531	0	9.7359	By MS/MS	By MS/MS	By MS/MS
P40429;M0QYS1;Q8J015;Q6NVV1;M0QZU1;A0A096LPE0	P40429;M0QYS1;Q8J015	8;7;6;3;1;1	8;7;6;3;1;1	8;7;6;3;1;1	60S ribosomal protein L13a	RPL13A;RPL13a	sp|P40429|RL13A_HUMAN 60S ribosomal protein L13a OS=Homo sapiens GN=RPL13A PE=1 SV=2;tr|M0QYS1|M0QYS1_HUMAN 60S ribosomal protein L13a (Fragment) OS=Homo sapiens GN=RPL13A PE=1 SV=2;tr|Q8J015|Q8J015_HUMAN 60S ribosomal protein L13a OS=Homo sapiens GN=RPL13	6	8	8	8	8	6	8	7	7	7	6	7	7	8	6	8	7	7	7	6	7	7	8	6	8	7	7	7	6	7	7	36.9	36.9	36.9	23.577	203	203;210;142;102;46;48	0	40.568	By MS/MS	By MS/MS	By MS/MS
P40926;G3XAL0	P40926;G3XAL0	11;7	11;7	11;7	Malate dehydrogenase, mitochondrial;Malate dehydrogenase	MDH2	sp|P40926|MDHM_HUMAN Malate dehydrogenase, mitochondrial OS=Homo sapiens GN=MDH2 PE=1 SV=3;tr|G3XAL0|G3XAL0_HUMAN Malate dehydrogenase OS=Homo sapiens GN=MDH2 PE=1 SV=1	2	11	11	11	7	7	10	9	5	5	7	11	7	7	7	10	9	5	5	7	11	7	7	7	10	9	5	5	7	11	7	42.6	42.6	42.6	35.503	338	338;231	0	46.411	By MS/MS	By MS/MS	By MS/MS
P41091;Q2VIR3;F8W810;H7BZU1	P41091;Q2VIR3;F8W810	9;7;5;3	9;7;5;3	9;7;5;3	Eukaryotic translation initiation factor 2 subunit 3;Putative eukaryotic translation initiation factor 2 subunit 3-like protein	EIF2S3;EIF2S3L	sp|P41091|IF2G_HUMAN Eukaryotic translation initiation factor 2 subunit 3 OS=Homo sapiens GN=EIF2S3 PE=1 SV=3;sp|Q2VIR3|IF2GL_HUMAN Putative eukaryotic translation initiation factor 2 subunit 3-like protein OS=Homo sapiens GN=EIF2S3L PE=5 SV=2;tr|F8W810|F8	4	9	9	9	6	4	8	6	7	4	7	7	3	6	4	8	6	7	4	7	7	3	6	4	8	6	7	4	7	7	3	26.9	26.9	26.9	51.109	472	472;472;466;183	0	27.207	By MS/MS	By MS/MS	By MS/MS
P41227;C9JN83;F8W808;A8MWP7;C9JW55;Q9BSU3;H0Y8T0	P41227	7;3;3;3;2;2;1	7;3;3;3;2;2;1	7;3;3;3;2;2;1	N-alpha-acetyltransferase 10	NAA10	sp|P41227|NAA10_HUMAN N-alpha-acetyltransferase 10 OS=Homo sapiens GN=NAA10 PE=1 SV=1	7	7	7	7	4	5	6	4	5	4	4	5	5	4	5	6	4	5	4	4	5	5	4	5	6	4	5	4	4	5	5	37	37	37	26.458	235	235;142;169;184;146;229;111	0	19.648	By MS/MS	By MS/MS	By MS/MS
P41240;H3BUM9	P41240;H3BUM9	2;1	2;1	2;1	Tyrosine-protein kinase CSK	CSK	sp|P41240|CSK_HUMAN Tyrosine-protein kinase CSK OS=Homo sapiens GN=CSK PE=1 SV=1;tr|H3BUM9|H3BUM9_HUMAN Tyrosine-protein kinase CSK (Fragment) OS=Homo sapiens GN=CSK PE=1 SV=1	2	2	2	2	2	2	2	1	0	2	2	2	1	2	2	2	1	0	2	2	2	1	2	2	2	1	0	2	2	2	1	4.9	4.9	4.9	50.704	450	450;110	0	5.5019	By MS/MS	By matching	By MS/MS
P41250	P41250	7	7	7	Glycine--tRNA ligase	GARS	sp|P41250|SYG_HUMAN Glycine--tRNA ligase OS=Homo sapiens GN=GARS PE=1 SV=3	1	7	7	7	5	2	4	4	3	3	1	3	3	5	2	4	4	3	3	1	3	3	5	2	4	4	3	3	1	3	3	9.5	9.5	9.5	83.165	739	739	0	14.541	By MS/MS	By matching	By MS/MS
P42167;G5E972;H0YJH7;P42166	P42167;G5E972;H0YJH7	11;10;8;5	11;10;8;5	11;10;8;5	Lamina-associated polypeptide 2, isoforms beta/gamma;Thymopoietin;Thymopentin	TMPO	sp|P42167|LAP2B_HUMAN Lamina-associated polypeptide 2, isoforms beta/gamma OS=Homo sapiens GN=TMPO PE=1 SV=2;tr|G5E972|G5E972_HUMAN Lamina-associated polypeptide 2, isoforms beta/gamma OS=Homo sapiens GN=TMPO PE=1 SV=1;tr|H0YJH7|H0YJH7_HUMAN Lamina-associa	4	11	11	11	8	5	10	9	9	8	6	11	8	8	5	10	9	9	8	6	11	8	8	5	10	9	9	8	6	11	8	35.5	35.5	35.5	50.67	454	454;414;237;694	0	41.402	By MS/MS	By MS/MS	By MS/MS
P42568	P42568	4	4	4	Protein AF-9	MLLT3	sp|P42568|AF9_HUMAN Protein AF-9 OS=Homo sapiens GN=MLLT3 PE=1 SV=2	1	4	4	4	2	3	3	3	4	2	3	3	3	2	3	3	3	4	2	3	3	3	2	3	3	3	4	2	3	3	3	7.9	7.9	7.9	63.351	568	568	0	11.068	By MS/MS	By MS/MS	By MS/MS
P42677;Q5T4L4	P42677;Q5T4L4	2;1	2;1	1;1	40S ribosomal protein S27	RPS27	sp|P42677|RS27_HUMAN 40S ribosomal protein S27 OS=Homo sapiens GN=RPS27 PE=1 SV=3;tr|Q5T4L4|Q5T4L4_HUMAN 40S ribosomal protein S27 OS=Homo sapiens GN=RPS27 PE=1 SV=1	2	2	2	1	2	2	2	2	2	2	2	2	2	2	2	2	2	2	2	2	2	2	1	1	1	1	1	1	1	1	1	22.6	22.6	13.1	9.461	84	84;66	0	6.8063	By MS/MS	By MS/MS	By MS/MS
P42704;C9JCA9;B8ZZ38;A0A0C4DG06;H7C3W8	P42704;C9JCA9;B8ZZ38;A0A0C4DG06	3;2;2;2;1	3;2;2;2;1	3;2;2;2;1	Leucine-rich PPR motif-containing protein, mitochondrial	LRPPRC	sp|P42704|LPPRC_HUMAN Leucine-rich PPR motif-containing protein, mitochondrial OS=Homo sapiens GN=LRPPRC PE=1 SV=3;tr|C9JCA9|C9JCA9_HUMAN Leucine-rich PPR motif-containing protein, mitochondrial (Fragment) OS=Homo sapiens GN=LRPPRC PE=1 SV=1;tr|B8ZZ38|B8ZZ	5	3	3	3	1	0	3	1	0	0	0	2	0	1	0	3	1	0	0	0	2	0	1	0	3	1	0	0	0	2	0	3.1	3.1	3.1	157.9	1394	1394;359;504;531;77	0	5.4169	By matching		By MS/MS
P42766;F2Z388	P42766	3;1	3;1	3;1	60S ribosomal protein L35	RPL35	sp|P42766|RL35_HUMAN 60S ribosomal protein L35 OS=Homo sapiens GN=RPL35 PE=1 SV=2	2	3	3	3	3	3	3	3	3	3	3	3	3	3	3	3	3	3	3	3	3	3	3	3	3	3	3	3	3	3	3	22.8	22.8	22.8	14.551	123	123;96	0	7.401	By MS/MS	By MS/MS	By MS/MS
P43487;F6WQW2;C9JXG8;C9JJ34;C9JGV6;C9JDM3;C9JIC6;Q5T0Z6;Q9C010	P43487;F6WQW2;C9JXG8;C9JJ34;C9JGV6	6;5;4;4;3;2;1;1;1	6;5;4;4;3;2;1;1;1	6;5;4;4;3;2;1;1;1	Ran-specific GTPase-activating protein	RANBP1	sp|P43487|RANG_HUMAN Ran-specific GTPase-activating protein OS=Homo sapiens GN=RANBP1 PE=1 SV=1;tr|F6WQW2|F6WQW2_HUMAN Ran-specific GTPase-activating protein OS=Homo sapiens GN=RANBP1 PE=1 SV=1;tr|C9JXG8|C9JXG8_HUMAN Ran-specific GTPase-activating protein	9	6	6	6	5	5	6	6	6	6	6	6	6	5	5	6	6	6	6	6	6	6	5	5	6	6	6	6	6	6	6	47.3	47.3	47.3	23.31	201	201;278;145;163;205;166;53;87;78	0	24.612	By MS/MS	By MS/MS	By MS/MS
P45973;F8VNY3	P45973;F8VNY3	4;2	4;2	4;2	Chromobox protein homolog 5	CBX5	sp|P45973|CBX5_HUMAN Chromobox protein homolog 5 OS=Homo sapiens GN=CBX5 PE=1 SV=1;tr|F8VNY3|F8VNY3_HUMAN Chromobox protein homolog 5 (Fragment) OS=Homo sapiens GN=CBX5 PE=1 SV=1	2	4	4	4	1	1	1	3	3	2	2	4	4	1	1	1	3	3	2	2	4	4	1	1	1	3	3	2	2	4	4	25.1	25.1	25.1	22.225	191	191;91	0	9.538	By MS/MS	By MS/MS	By MS/MS
P46060;H0Y4Q3;B0QYT5;B0QYT4	P46060	9;4;2;2	9;4;2;2	9;4;2;2	Ran GTPase-activating protein 1	RANGAP1	sp|P46060|RAGP1_HUMAN Ran GTPase-activating protein 1 OS=Homo sapiens GN=RANGAP1 PE=1 SV=1	4	9	9	9	6	4	6	5	5	5	6	6	5	6	4	6	5	5	5	6	6	5	6	4	6	5	5	5	6	6	5	18.2	18.2	18.2	63.541	587	587;253;100;133	0	33.819	By MS/MS	By MS/MS	By MS/MS
P46777;Q5T7N0	P46777	9;1	9;1	9;1	60S ribosomal protein L5	RPL5	sp|P46777|RL5_HUMAN 60S ribosomal protein L5 OS=Homo sapiens GN=RPL5 PE=1 SV=3	2	9	9	9	9	9	9	9	9	9	9	8	9	9	9	9	9	9	9	9	8	9	9	9	9	9	9	9	9	8	9	25.6	25.6	25.6	34.362	297	297;130	0	37.389	By MS/MS	By MS/MS	By MS/MS
P46778;G3V1B3;M0R181	P46778;G3V1B3;M0R181	4;3;3	4;3;3	4;3;3	60S ribosomal protein L21	RPL21	sp|P46778|RL21_HUMAN 60S ribosomal protein L21 OS=Homo sapiens GN=RPL21 PE=1 SV=2;tr|G3V1B3|G3V1B3_HUMAN 60S ribosomal protein L21 OS=Homo sapiens GN=RPL21 PE=1 SV=1;tr|M0R181|M0R181_HUMAN 60S ribosomal protein L21 (Fragment) OS=Homo sapiens GN=RPL21 PE=1	3	4	4	4	4	4	4	4	4	4	4	4	4	4	4	4	4	4	4	4	4	4	4	4	4	4	4	4	4	4	4	25.6	25.6	25.6	18.565	160	160;87;122	0	18.882	By MS/MS	By MS/MS	By MS/MS
P46783;F6U211;S4R435;Q9NQ39	P46783;F6U211;S4R435;Q9NQ39	5;4;4;3	5;4;4;3	5;4;4;3	40S ribosomal protein S10;Putative 40S ribosomal protein S10-like	RPS10;RPS10-NUDT3;RPS10P5	sp|P46783|RS10_HUMAN 40S ribosomal protein S10 OS=Homo sapiens GN=RPS10 PE=1 SV=1;tr|F6U211|F6U211_HUMAN 40S ribosomal protein S10 OS=Homo sapiens GN=RPS10 PE=4 SV=1;tr|S4R435|S4R435_HUMAN Protein RPS10-NUDT3 (Fragment) OS=Homo sapiens GN=RPS10-NUDT3 PE=4	4	5	5	5	5	5	5	4	2	5	4	5	4	5	5	5	4	2	5	4	5	4	5	5	5	4	2	5	4	5	4	32.7	32.7	32.7	18.898	165	165;172;286;176	0	24.145	By MS/MS	By MS/MS	By MS/MS
P46939;Q5T097	P46939	4;1	4;1	4;1	Utrophin	UTRN	sp|P46939|UTRO_HUMAN Utrophin OS=Homo sapiens GN=UTRN PE=1 SV=2	2	4	4	4	3	3	2	3	4	3	3	3	3	3	3	2	3	4	3	3	3	3	3	3	2	3	4	3	3	3	3	1.5	1.5	1.5	394.46	3433	3433;988	0	6.3012	By matching	By MS/MS	By matching
P46940;H0YLE8;A0A0J9YXZ5	P46940;H0YLE8;A0A0J9YXZ5	2;1;1	2;1;1	2;1;1	Ras GTPase-activating-like protein IQGAP1	IQGAP1	sp|P46940|IQGA1_HUMAN Ras GTPase-activating-like protein IQGAP1 OS=Homo sapiens GN=IQGAP1 PE=1 SV=1;tr|H0YLE8|H0YLE8_HUMAN Ras GTPase-activating-like protein IQGAP1 OS=Homo sapiens GN=IQGAP1 PE=1 SV=1;tr|A0A0J9YXZ5|A0A0J9YXZ5_HUMAN Ras GTPase-activating-li	3	2	2	2	0	1	1	0	1	0	1	2	1	0	1	1	0	1	0	1	2	1	0	1	1	0	1	0	1	2	1	1.8	1.8	1.8	189.25	1657	1657;1085;1191	0.0018083	2.8971		By matching	By MS/MS
P46977	P46977	1	1	1	Dolichyl-diphosphooligosaccharide--protein glycosyltransferase subunit STT3A	STT3A	sp|P46977|STT3A_HUMAN Dolichyl-diphosphooligosaccharide--protein glycosyltransferase subunit STT3A OS=Homo sapiens GN=STT3A PE=1 SV=2	1	1	1	1	1	0	0	1	0	0	1	1	0	1	0	0	1	0	0	1	1	0	1	0	0	1	0	0	1	1	0	1.7	1.7	1.7	80.529	705	705	0.0018182	2.958	By matching
P47813;X6RAC9;A6NJH9;O14602	P47813;X6RAC9;A6NJH9;O14602	4;3;3;3	4;3;3;3	4;3;3;3	Eukaryotic translation initiation factor 1A, X-chromosomal;Eukaryotic translation initiation factor 1A, Y-chromosomal	EIF1AX;EIF1AY	sp|P47813|IF1AX_HUMAN Eukaryotic translation initiation factor 1A, X-chromosomal OS=Homo sapiens GN=EIF1AX PE=1 SV=2;tr|X6RAC9|X6RAC9_HUMAN Eukaryotic translation initiation factor 1A, X-chromosomal OS=Homo sapiens GN=EIF1AX PE=1 SV=1;tr|A6NJH9|A6NJH9_HUMA	4	4	4	4	3	3	4	3	3	3	3	3	3	3	3	4	3	3	3	3	3	3	3	3	4	3	3	3	3	3	3	26.4	26.4	26.4	16.46	144	144;116;127;144	0	12.24	By MS/MS	By MS/MS	By MS/MS
P47914	P47914	2	2	2	60S ribosomal protein L29	RPL29	sp|P47914|RL29_HUMAN 60S ribosomal protein L29 OS=Homo sapiens GN=RPL29 PE=1 SV=2	1	2	2	2	2	2	2	2	2	2	2	2	2	2	2	2	2	2	2	2	2	2	2	2	2	2	2	2	2	2	2	14.5	14.5	14.5	17.752	159	159	0	8.2005	By MS/MS	By MS/MS	By MS/MS
P48059;A0A0J9YXC7;A0A0M3HER1;A0A087X2F9;Q7Z4I7;C9JF46;F8WB59;H0Y592;A0A0J9YYC1;F8WE10;F8WC86	P48059;A0A0J9YXC7;A0A0M3HER1	11;8;6;5;5;3;2;2;1;1;1	11;8;6;5;5;3;2;2;1;1;1	11;8;6;5;5;3;2;2;1;1;1	LIM and senescent cell antigen-like-containing domain protein 1	LIMS1	sp|P48059|LIMS1_HUMAN LIM and senescent cell antigen-like-containing domain protein 1 OS=Homo sapiens GN=LIMS1 PE=1 SV=4;tr|A0A0J9YXC7|A0A0J9YXC7_HUMAN LIM and senescent cell antigen-like-containing domain protein 3 OS=Homo sapiens GN=LIMS4 PE=1 SV=1;tr|A0	11	11	11	11	9	8	8	8	10	9	8	8	8	9	8	8	8	10	9	8	8	8	9	8	8	8	10	9	8	8	8	38.5	38.5	38.5	37.251	325	325;398;209;249;341;177;55;169;55;100;117	0	34.389	By MS/MS	By MS/MS	By MS/MS
P48634	P48634	3	3	3	Protein PRRC2A	PRRC2A	sp|P48634|PRC2A_HUMAN Protein PRRC2A OS=Homo sapiens GN=PRRC2A PE=1 SV=3	1	3	3	3	0	0	2	1	1	1	0	1	0	0	0	2	1	1	1	0	1	0	0	0	2	1	1	1	0	1	0	2	2	2	228.86	2157	2157	0	4.1995			By MS/MS
P49006	P49006	2	2	2	MARCKS-related protein	MARCKSL1	sp|P49006|MRP_HUMAN MARCKS-related protein OS=Homo sapiens GN=MARCKSL1 PE=1 SV=2	1	2	2	2	2	2	2	2	2	2	2	2	2	2	2	2	2	2	2	2	2	2	2	2	2	2	2	2	2	2	2	14.4	14.4	14.4	19.529	195	195	0	15.673	By MS/MS	By MS/MS	By MS/MS
P49207	P49207	5	5	5	60S ribosomal protein L34	RPL34	sp|P49207|RL34_HUMAN 60S ribosomal protein L34 OS=Homo sapiens GN=RPL34 PE=1 SV=3	1	5	5	5	5	5	5	5	5	5	5	5	5	5	5	5	5	5	5	5	5	5	5	5	5	5	5	5	5	5	5	36.8	36.8	36.8	13.293	117	117	0	12.941	By MS/MS	By MS/MS	By MS/MS
P49368;B4DUR8;E9PRC8;Q5SZX6;Q5SZX9;E9PQ35;E9PM09;Q5SZW8	P49368;B4DUR8	24;23;6;6;4;3;2;2	24;23;6;6;4;3;2;2	24;23;6;6;4;3;2;2	T-complex protein 1 subunit gamma	CCT3	sp|P49368|TCPG_HUMAN T-complex protein 1 subunit gamma OS=Homo sapiens GN=CCT3 PE=1 SV=4;tr|B4DUR8|B4DUR8_HUMAN T-complex protein 1 subunit gamma OS=Homo sapiens GN=CCT3 PE=1 SV=1	8	24	24	24	20	19	21	22	22	22	21	21	20	20	19	21	22	22	22	21	21	20	20	19	21	22	22	22	21	21	20	51.6	51.6	51.6	60.533	545	545;500;234;276;161;144;154;188	0	106.92	By MS/MS	By MS/MS	By MS/MS
P49411	P49411	3	3	3	Elongation factor Tu, mitochondrial	TUFM	sp|P49411|EFTU_HUMAN Elongation factor Tu, mitochondrial OS=Homo sapiens GN=TUFM PE=1 SV=2	1	3	3	3	1	1	3	1	2	1	0	2	2	1	1	3	1	2	1	0	2	2	1	1	3	1	2	1	0	2	2	8.2	8.2	8.2	49.541	452	452	0	9.0315	By MS/MS	By matching	By MS/MS
P49458;E9PE20	P49458;E9PE20	2;1	2;1	2;1	Signal recognition particle 9 kDa protein	SRP9	sp|P49458|SRP09_HUMAN Signal recognition particle 9 kDa protein OS=Homo sapiens GN=SRP9 PE=1 SV=2;tr|E9PE20|E9PE20_HUMAN Signal recognition particle 9 kDa protein OS=Homo sapiens GN=SRP9 PE=1 SV=1	2	2	2	2	2	2	1	2	2	2	2	1	2	2	2	1	2	2	2	2	1	2	2	2	1	2	2	2	2	1	2	25.6	25.6	25.6	10.112	86	86;66	0	8.1214	By MS/MS	By MS/MS	By MS/MS
P49588;H3BPK7	P49588;H3BPK7	4;3	4;3	4;3	Alanine--tRNA ligase, cytoplasmic	AARS	sp|P49588|SYAC_HUMAN Alanine--tRNA ligase, cytoplasmic OS=Homo sapiens GN=AARS PE=1 SV=2;tr|H3BPK7|H3BPK7_HUMAN Alanine--tRNA ligase, cytoplasmic (Fragment) OS=Homo sapiens GN=AARS PE=1 SV=3	2	4	4	4	4	4	4	3	3	4	3	4	4	4	4	4	3	3	4	3	4	4	4	4	4	3	3	4	3	4	4	5.2	5.2	5.2	106.81	968	968;280	0	13.287	By MS/MS	By MS/MS	By MS/MS
Q5T5C7;P49591	Q5T5C7;P49591	8;8	8;8	8;8	Serine--tRNA ligase, cytoplasmic	SARS	tr|Q5T5C7|Q5T5C7_HUMAN Serine--tRNA ligase, cytoplasmic OS=Homo sapiens GN=SARS PE=1 SV=1;sp|P49591|SYSC_HUMAN Serine--tRNA ligase, cytoplasmic OS=Homo sapiens GN=SARS PE=1 SV=3	2	8	8	8	6	3	5	3	4	4	4	7	2	6	3	5	3	4	4	4	7	2	6	3	5	3	4	4	4	7	2	16.8	16.8	16.8	61.312	536	536;514	0	30.604	By MS/MS	By MS/MS	By MS/MS
P49721	P49721	2	2	2	Proteasome subunit beta type-2	PSMB2	sp|P49721|PSB2_HUMAN Proteasome subunit beta type-2 OS=Homo sapiens GN=PSMB2 PE=1 SV=1	1	2	2	2	1	1	2	1	0	1	0	1	0	1	1	2	1	0	1	0	1	0	1	1	2	1	0	1	0	1	0	12.4	12.4	12.4	22.836	201	201	0	4.0455	By MS/MS	By matching	By MS/MS
P49755;G3V2K7	P49755;G3V2K7	2;1	2;1	2;1	Transmembrane emp24 domain-containing protein 10	TMED10	sp|P49755|TMEDA_HUMAN Transmembrane emp24 domain-containing protein 10 OS=Homo sapiens GN=TMED10 PE=1 SV=2;tr|G3V2K7|G3V2K7_HUMAN Transmembrane emp24 domain-containing protein 10 OS=Homo sapiens GN=TMED10 PE=1 SV=1	2	2	2	2	2	1	2	2	1	0	0	2	1	2	1	2	2	1	0	0	2	1	2	1	2	2	1	0	0	2	1	9.1	9.1	9.1	24.976	219	219;153	0	5.2542	By MS/MS	By MS/MS	By MS/MS
P49756;E9PQU5;H0YE46;E9PSE8	P49756	20;9;3;3	20;9;3;3	20;9;3;3	RNA-binding protein 25	RBM25	sp|P49756|RBM25_HUMAN RNA-binding protein 25 OS=Homo sapiens GN=RBM25 PE=1 SV=3	4	20	20	20	20	18	19	16	16	16	14	15	17	20	18	19	16	16	16	14	15	17	20	18	19	16	16	16	14	15	17	26.8	26.8	26.8	100.18	843	843;243;73;127	0	86.745	By MS/MS	By MS/MS	By MS/MS
P49773;D6REP8;D6RE99;D6RD60;D6RC06	P49773;D6REP8;D6RE99;D6RD60	3;2;2;2;1	3;2;2;2;1	3;2;2;2;1	Histidine triad nucleotide-binding protein 1	HINT1	sp|P49773|HINT1_HUMAN Histidine triad nucleotide-binding protein 1 OS=Homo sapiens GN=HINT1 PE=1 SV=2;tr|D6REP8|D6REP8_HUMAN Histidine triad nucleotide-binding protein 1 OS=Homo sapiens GN=HINT1 PE=1 SV=1;tr|D6RE99|D6RE99_HUMAN Histidine triad nucleotide-b	5	3	3	3	2	2	2	2	3	2	1	2	2	2	2	2	2	3	2	1	2	2	2	2	2	2	3	2	1	2	2	31.7	31.7	31.7	13.802	126	126;78;78;103;65	0	11.695	By MS/MS	By MS/MS	By MS/MS
P50395;Q5SX87;V9GYJ7;V9GYF8;Q5SX90;Q5SX91;Q5SX86;P31150;G5E9U5	P50395;Q5SX87	8;4;3;3;3;3;2;2;1	8;4;3;3;3;3;2;2;1	8;4;3;3;3;3;2;2;1	Rab GDP dissociation inhibitor beta	GDI2	sp|P50395|GDIB_HUMAN Rab GDP dissociation inhibitor beta OS=Homo sapiens GN=GDI2 PE=1 SV=2;tr|Q5SX87|Q5SX87_HUMAN Rab GDP dissociation inhibitor beta (Fragment) OS=Homo sapiens GN=GDI2 PE=1 SV=1	9	8	8	8	5	5	7	7	4	3	3	5	6	5	5	7	7	4	3	3	5	6	5	5	7	7	4	3	3	5	6	22.2	22.2	22.2	50.663	445	445;263;126;130;148;203;155;447;147	0	19.134	By MS/MS	By MS/MS	By MS/MS
P50402;Q5HY57	P50402;Q5HY57	4;3	4;3	4;3	Emerin	EMD	sp|P50402|EMD_HUMAN Emerin OS=Homo sapiens GN=EMD PE=1 SV=1;tr|Q5HY57|Q5HY57_HUMAN Emerin OS=Homo sapiens GN=EMD PE=1 SV=1	2	4	4	4	3	4	3	4	2	4	2	4	3	3	4	3	4	2	4	2	4	3	3	4	3	4	2	4	2	4	3	19.7	19.7	19.7	28.994	254	254;219	0	9.1215	By MS/MS	By MS/MS	By MS/MS
P50502;Q3KNR6;Q8NFI4;H7C3I1;F6VDH7;A0A087X1H6;Q8IZP2;F8WAQ7	P50502;Q3KNR6;Q8NFI4;H7C3I1;F6VDH7;A0A087X1H6;Q8IZP2	10;8;7;6;6;6;5;1	10;8;7;6;6;6;5;1	10;8;7;6;6;6;5;1	Hsc70-interacting protein;Putative protein FAM10A5;Putative protein FAM10A4	ST13;ST13P5;ST13P4	sp|P50502|F10A1_HUMAN Hsc70-interacting protein OS=Homo sapiens GN=ST13 PE=1 SV=2;tr|Q3KNR6|Q3KNR6_HUMAN Hsc70-interacting protein OS=Homo sapiens GN=ST13 PE=1 SV=1;sp|Q8NFI4|F10A5_HUMAN Putative protein FAM10A5 OS=Homo sapiens GN=ST13P5 PE=5 SV=1;tr|H7C3I	8	10	10	10	9	10	9	10	10	10	10	10	10	9	10	9	10	10	10	10	10	10	9	10	9	10	10	10	10	10	10	36.3	36.3	36.3	41.331	369	369;211;369;146;162;254;240;38	0	53.446	By MS/MS	By MS/MS	By MS/MS
P50579;G3V1U3;F8VRR3;F8VQZ7;F8VSC4;F8VY03	P50579;G3V1U3;F8VRR3;F8VQZ7;F8VSC4	4;3;3;3;2;1	4;3;3;3;2;1	4;3;3;3;2;1	Methionine aminopeptidase 2	METAP2	sp|P50579|MAP2_HUMAN Methionine aminopeptidase 2 OS=Homo sapiens GN=METAP2 PE=1 SV=1;tr|G3V1U3|G3V1U3_HUMAN Methionine aminopeptidase OS=Homo sapiens GN=METAP2 PE=1 SV=1;tr|F8VRR3|F8VRR3_HUMAN Methionine aminopeptidase 2 OS=Homo sapiens GN=METAP2 PE=1 SV=1	6	4	4	4	2	2	3	3	3	2	3	2	2	2	2	3	3	3	2	3	2	2	2	2	3	3	3	2	3	2	2	12.6	12.6	12.6	52.891	478	478;328;442;477;161;178	0	24.657	By matching	By MS/MS	By matching
P50990;H7C4C8;H7C2U0	P50990	23;11;3	23;11;3	23;11;3	T-complex protein 1 subunit theta	CCT8	sp|P50990|TCPQ_HUMAN T-complex protein 1 subunit theta OS=Homo sapiens GN=CCT8 PE=1 SV=4	3	23	23	23	20	16	20	21	20	21	21	23	18	20	16	20	21	20	21	21	23	18	20	16	20	21	20	21	21	23	18	49.3	49.3	49.3	59.62	548	548;323;107	0	95.352	By MS/MS	By MS/MS	By MS/MS
P50991	P50991	9	9	9	T-complex protein 1 subunit delta	CCT4	sp|P50991|TCPD_HUMAN T-complex protein 1 subunit delta OS=Homo sapiens GN=CCT4 PE=1 SV=4	1	9	9	9	4	5	8	6	6	8	7	8	5	4	5	8	6	6	8	7	8	5	4	5	8	6	6	8	7	8	5	24.3	24.3	24.3	57.924	539	539	0	31.177	By MS/MS	By MS/MS	By MS/MS
P50995;H0Y6E1	P50995	9;3	9;3	9;3	Annexin A11	ANXA11	sp|P50995|ANX11_HUMAN Annexin A11 OS=Homo sapiens GN=ANXA11 PE=1 SV=1	2	9	9	9	5	6	6	6	9	7	8	8	7	5	6	6	6	9	7	8	8	7	5	6	6	6	9	7	8	8	7	22.4	22.4	22.4	54.389	505	505;148	0	33.257	By MS/MS	By MS/MS	By MS/MS
P51148;K7EIP6;F8WCY6;F8WD79;F8VPW9;F8VSF8;F8VWZ7;F8VWU4;F8VVZ0;F8VUA5;F8VVK3;K7ERI8;K7ERQ8;P61020;P20339	P51148;K7EIP6;F8WCY6;F8WD79;F8VPW9;F8VSF8;F8VWZ7;F8VWU4;F8VVZ0;F8VUA5;F8VVK3;K7ERI8;K7ERQ8;P61020;P20339	2;1;1;1;1;1;1;1;1;1;1;1;1;1;1	2;1;1;1;1;1;1;1;1;1;1;1;1;1;1	2;1;1;1;1;1;1;1;1;1;1;1;1;1;1	Ras-related protein Rab-5C;Ras-related protein Rab-5B;Ras-related protein Rab-5A	RAB5C;RAB5A;RAB5B	sp|P51148|RAB5C_HUMAN Ras-related protein Rab-5C OS=Homo sapiens GN=RAB5C PE=1 SV=2;tr|K7EIP6|K7EIP6_HUMAN Uncharacterized protein (Fragment) OS=Homo sapiens PE=4 SV=1;tr|F8WCY6|F8WCY6_HUMAN Ras-related protein Rab-5A OS=Homo sapiens GN=RAB5A PE=1 SV=1;tr|	15	2	2	2	1	2	2	2	2	2	2	2	2	1	2	2	2	2	2	2	2	2	1	2	2	2	2	2	2	2	2	10.6	10.6	10.6	23.482	216	216;27;62;65;73;74;79;92;100;115;124;161;282;215;215	0	7.1822	By matching	By matching	By MS/MS
P51149;C9J592;C9J8S3;C9IZZ0;C9J4V0;C9J4S4;C9J7D1	P51149;C9J592;C9J8S3;C9IZZ0;C9J4V0	11;8;8;6;6;5;3	11;8;8;6;6;5;3	11;8;8;6;6;5;3	Ras-related protein Rab-7a	RAB7A	sp|P51149|RAB7A_HUMAN Ras-related protein Rab-7a OS=Homo sapiens GN=RAB7A PE=1 SV=1;tr|C9J592|C9J592_HUMAN Ras-related protein Rab-7a (Fragment) OS=Homo sapiens GN=RAB7A PE=1 SV=1;tr|C9J8S3|C9J8S3_HUMAN Ras-related protein Rab-7a OS=Homo sapiens GN=RAB7A P	7	11	11	11	8	9	10	11	10	10	10	11	9	8	9	10	11	10	10	10	11	9	8	9	10	11	10	10	10	11	9	66.2	66.2	66.2	23.489	207	207;150;160;116;134;98;91	0	52.161	By MS/MS	By MS/MS	By MS/MS
P51572;C9JMD7;C9JSP1;C9JQ75;C9J0M4	P51572;C9JMD7;C9JSP1;C9JQ75;C9J0M4	5;3;3;3;3	5;3;3;3;3	5;3;3;3;3	B-cell receptor-associated protein 31	BCAP31	sp|P51572|BAP31_HUMAN B-cell receptor-associated protein 31 OS=Homo sapiens GN=BCAP31 PE=1 SV=3;tr|C9JMD7|C9JMD7_HUMAN B-cell receptor-associated protein 31 (Fragment) OS=Homo sapiens GN=BCAP31 PE=1 SV=1;tr|C9JSP1|C9JSP1_HUMAN B-cell receptor-associated pr	5	5	5	5	5	5	5	5	5	4	5	5	5	5	5	5	5	5	4	5	5	5	5	5	5	5	5	4	5	5	5	15.9	15.9	15.9	27.991	246	246;178;182;187;188	0	13.563	By MS/MS	By MS/MS	By MS/MS
P51659;E7ER27;E7EWE5;E7EPL9;G5E9S2;E7ET17	P51659;E7ER27;E7EWE5	4;3;3;1;1;1	4;3;3;1;1;1	4;3;3;1;1;1	Peroxisomal multifunctional enzyme type 2;(3R)-hydroxyacyl-CoA dehydrogenase;Enoyl-CoA hydratase 2	HSD17B4	sp|P51659|DHB4_HUMAN Peroxisomal multifunctional enzyme type 2 OS=Homo sapiens GN=HSD17B4 PE=1 SV=3;tr|E7ER27|E7ER27_HUMAN Peroxisomal multifunctional enzyme type 2 OS=Homo sapiens GN=HSD17B4 PE=1 SV=3;tr|E7EWE5|E7EWE5_HUMAN Peroxisomal multifunctional enz	6	4	4	4	1	0	2	1	0	1	1	2	1	1	0	2	1	0	1	1	2	1	1	0	2	1	0	1	1	2	1	6.8	6.8	6.8	79.685	736	736;500;712;474;596;599	0	8.8099	By matching		By MS/MS
P51665;H3BNT7;H3BTM8	P51665;H3BNT7;H3BTM8	2;1;1	2;1;1	2;1;1	26S proteasome non-ATPase regulatory subunit 7	PSMD7	sp|P51665|PSMD7_HUMAN 26S proteasome non-ATPase regulatory subunit 7 OS=Homo sapiens GN=PSMD7 PE=1 SV=2;tr|H3BNT7|H3BNT7_HUMAN 26S proteasome non-ATPase regulatory subunit 7 OS=Homo sapiens GN=PSMD7 PE=1 SV=1;tr|H3BTM8|H3BTM8_HUMAN 26S proteasome non-ATPas	3	2	2	2	0	1	1	1	1	1	0	2	0	0	1	1	1	1	1	0	2	0	0	1	1	1	1	1	0	2	0	11.1	11.1	11.1	37.025	324	324;177;198	0	4.8259		By matching	By MS/MS
P51858	P51858	3	2	2	Hepatoma-derived growth factor	HDGF	sp|P51858|HDGF_HUMAN Hepatoma-derived growth factor OS=Homo sapiens GN=HDGF PE=1 SV=1	1	3	2	2	2	2	3	3	2	2	2	3	3	1	1	2	2	1	1	1	2	2	1	1	2	2	1	1	1	2	2	18.3	15	15	26.788	240	240	0	3.7164	By matching	By MS/MS	By MS/MS
P51991;H7C1J8	P51991	5;1	5;1	4;1	Heterogeneous nuclear ribonucleoprotein A3	HNRNPA3	sp|P51991|ROA3_HUMAN Heterogeneous nuclear ribonucleoprotein A3 OS=Homo sapiens GN=HNRNPA3 PE=1 SV=2	2	5	5	4	4	4	4	4	4	4	4	4	3	4	4	4	4	4	4	4	4	3	4	4	4	4	4	4	4	4	3	18	18	13.8	39.594	378	378;115	0	12.432	By matching	By MS/MS	By MS/MS
P52209;K7EM49;K7EMN2;K7EPF6;K7ELN9	P52209;K7EM49;K7EMN2;K7EPF6	7;5;4;4;1	7;5;4;4;1	7;5;4;4;1	6-phosphogluconate dehydrogenase, decarboxylating	PGD	sp|P52209|6PGD_HUMAN 6-phosphogluconate dehydrogenase, decarboxylating OS=Homo sapiens GN=PGD PE=1 SV=3;tr|K7EM49|K7EM49_HUMAN 6-phosphogluconate dehydrogenase, decarboxylating (Fragment) OS=Homo sapiens GN=PGD PE=1 SV=1;tr|K7EMN2|K7EMN2_HUMAN 6-phosphoglu	5	7	7	7	5	6	6	6	7	6	7	7	7	5	6	6	6	7	6	7	7	7	5	6	6	6	7	6	7	7	7	19.7	19.7	19.7	53.139	483	483;205;160;256;224	0	31.111	By MS/MS	By MS/MS	By MS/MS
P52292;J3QLL0;J3KS65;J3QL07	P52292	16;7;7;1	16;7;7;1	16;7;7;1	Importin subunit alpha-1	KPNA2	sp|P52292|IMA1_HUMAN Importin subunit alpha-1 OS=Homo sapiens GN=KPNA2 PE=1 SV=1	4	16	16	16	11	12	14	15	13	14	15	14	13	11	12	14	15	13	14	15	14	13	11	12	14	15	13	14	15	14	13	38.8	38.8	38.8	57.861	529	529;134;143;50	0	88.551	By MS/MS	By MS/MS	By MS/MS
P52701;A0A087WWJ1;A0A087WYT6	P52701;A0A087WWJ1	7;6;1	7;6;1	7;6;1	DNA mismatch repair protein Msh6	MSH6	sp|P52701|MSH6_HUMAN DNA mismatch repair protein Msh6 OS=Homo sapiens GN=MSH6 PE=1 SV=2;tr|A0A087WWJ1|A0A087WWJ1_HUMAN DNA mismatch repair protein Msh6 OS=Homo sapiens GN=MSH6 PE=1 SV=1	3	7	7	7	5	4	6	4	5	6	0	5	4	5	4	6	4	5	6	0	5	4	5	4	6	4	5	6	0	5	4	7.1	7.1	7.1	152.78	1360	1360;1067;327	0	14.945	By MS/MS	By MS/MS	By MS/MS
P52907;C9JUG7;F8W9N7;A0A0D9SET8;P47755	P52907	3;1;1;1;1	3;1;1;1;1	3;1;1;1;1	F-actin-capping protein subunit alpha-1	CAPZA1	sp|P52907|CAZA1_HUMAN F-actin-capping protein subunit alpha-1 OS=Homo sapiens GN=CAPZA1 PE=1 SV=3	5	3	3	3	2	2	3	3	3	2	2	3	3	2	2	3	3	3	2	2	3	3	2	2	3	3	3	2	2	3	3	15.4	15.4	15.4	32.922	286	286;146;174;174;286	0	8.0308	By MS/MS	By matching	By MS/MS
P53396;K7ESG8;K7EIE7	P53396	18;2;1	18;2;1	18;2;1	ATP-citrate synthase	ACLY	sp|P53396|ACLY_HUMAN ATP-citrate synthase OS=Homo sapiens GN=ACLY PE=1 SV=3	3	18	18	18	11	13	14	14	11	14	17	14	10	11	13	14	14	11	14	17	14	10	11	13	14	14	11	14	17	14	10	21.9	21.9	21.9	120.84	1101	1101;109;133	0	55.968	By MS/MS	By MS/MS	By MS/MS
P53582;H0Y9L0;D6RF24;H0Y955;H0Y903	P53582	6;2;2;2;1	6;2;2;2;1	6;2;2;2;1	Methionine aminopeptidase 1	METAP1	sp|P53582|MAP11_HUMAN Methionine aminopeptidase 1 OS=Homo sapiens GN=METAP1 PE=1 SV=2	5	6	6	6	4	4	5	5	5	4	5	4	4	4	4	5	5	5	4	5	4	4	4	4	5	5	5	4	5	4	4	23.1	23.1	23.1	43.215	386	386;44;48;170;116	0	37.356	By MS/MS	By MS/MS	By MS/MS
P53621	P53621	11	11	11	Coatomer subunit alpha;Xenin;Proxenin	COPA	sp|P53621|COPA_HUMAN Coatomer subunit alpha OS=Homo sapiens GN=COPA PE=1 SV=2	1	11	11	11	7	6	7	6	5	6	11	9	6	7	6	7	6	5	6	11	9	6	7	6	7	6	5	6	11	9	6	12.3	12.3	12.3	138.34	1224	1224	0	28.154	By MS/MS	By MS/MS	By MS/MS
Q5T8R3;Q5T8R5;P53985	Q5T8R3;Q5T8R5;P53985	1;1;1	1;1;1	1;1;1	Monocarboxylate transporter 1	SLC16A1	tr|Q5T8R3|Q5T8R3_HUMAN Monocarboxylate transporter 1 (Fragment) OS=Homo sapiens GN=SLC16A1 PE=1 SV=1;tr|Q5T8R5|Q5T8R5_HUMAN Monocarboxylate transporter 1 (Fragment) OS=Homo sapiens GN=SLC16A1 PE=1 SV=1;sp|P53985|MOT1_HUMAN Monocarboxylate transporter 1 OS=	3	1	1	1	1	1	1	1	1	1	0	1	0	1	1	1	1	1	1	0	1	0	1	1	1	1	1	1	0	1	0	4.1	4.1	4.1	31.689	296	296;456;500	0	4.2356	By matching	By matching	By MS/MS
P53999;D6RC37;D6R970	P53999	4;1;1	4;1;1	4;1;1	Activated RNA polymerase II transcriptional coactivator p15	SUB1	sp|P53999|TCP4_HUMAN Activated RNA polymerase II transcriptional coactivator p15 OS=Homo sapiens GN=SUB1 PE=1 SV=3	3	4	4	4	4	4	4	4	4	4	4	4	4	4	4	4	4	4	4	4	4	4	4	4	4	4	4	4	4	4	4	33.9	33.9	33.9	14.395	127	127;66;84	0	15.436	By MS/MS	By MS/MS	By MS/MS
P54136	P54136	4	4	4	Arginine--tRNA ligase, cytoplasmic	RARS	sp|P54136|SYRC_HUMAN Arginine--tRNA ligase, cytoplasmic OS=Homo sapiens GN=RARS PE=1 SV=2	1	4	4	4	3	1	3	4	2	3	4	3	1	3	1	3	4	2	3	4	3	1	3	1	3	4	2	3	4	3	1	7.7	7.7	7.7	75.378	660	660	0	9.7124	By MS/MS	By matching	By MS/MS
P54577;A0A0C4DGZ5	P54577;A0A0C4DGZ5	12;9	12;9	12;9	Tyrosine--tRNA ligase, cytoplasmic;Tyrosine--tRNA ligase, cytoplasmic, N-terminally processed;Tyrosine--tRNA ligase	YARS	sp|P54577|SYYC_HUMAN Tyrosine--tRNA ligase, cytoplasmic OS=Homo sapiens GN=YARS PE=1 SV=4;tr|A0A0C4DGZ5|A0A0C4DGZ5_HUMAN Tyrosine--tRNA ligase OS=Homo sapiens GN=YARS PE=1 SV=1	2	12	12	12	3	4	8	7	8	5	7	11	7	3	4	8	7	8	5	7	11	7	3	4	8	7	8	5	7	11	7	22.7	22.7	22.7	59.143	528	528;388	0	33.36	By MS/MS	By MS/MS	By MS/MS
P54886	P54886	2	2	2	Delta-1-pyrroline-5-carboxylate synthase;Glutamate 5-kinase;Gamma-glutamyl phosphate reductase	ALDH18A1	sp|P54886|P5CS_HUMAN Delta-1-pyrroline-5-carboxylate synthase OS=Homo sapiens GN=ALDH18A1 PE=1 SV=2	1	2	2	2	1	0	2	0	0	0	0	2	1	1	0	2	0	0	0	0	2	1	1	0	2	0	0	0	0	2	1	3.9	3.9	3.9	87.301	795	795	0	5.4436	By matching		By MS/MS
P55010;H0YLZ1;H0YN40;H0YMJ8;H0YM54	P55010	6;2;2;1;1	6;2;2;1;1	6;2;2;1;1	Eukaryotic translation initiation factor 5	EIF5	sp|P55010|IF5_HUMAN Eukaryotic translation initiation factor 5 OS=Homo sapiens GN=EIF5 PE=1 SV=2	5	6	6	6	5	4	6	4	3	4	5	4	4	5	4	6	4	3	4	5	4	4	5	4	6	4	3	4	5	4	4	16.2	16.2	16.2	49.222	431	431;146;200;101;109	0	21.033	By MS/MS	By MS/MS	By MS/MS
P55060	P55060	4	4	4	Exportin-2	CSE1L	sp|P55060|XPO2_HUMAN Exportin-2 OS=Homo sapiens GN=CSE1L PE=1 SV=3	1	4	4	4	4	4	3	3	3	3	4	4	3	4	4	3	3	3	3	4	4	3	4	4	3	3	3	3	4	4	3	5.3	5.3	5.3	110.42	971	971	0	16.124	By MS/MS	By MS/MS	By MS/MS
P55072;C9JUP7;C9IZA5	P55072	10;2;2	10;2;2	10;2;2	Transitional endoplasmic reticulum ATPase	VCP	sp|P55072|TERA_HUMAN Transitional endoplasmic reticulum ATPase OS=Homo sapiens GN=VCP PE=1 SV=4	3	10	10	10	7	7	7	6	7	6	4	9	8	7	7	7	6	7	6	4	9	8	7	7	7	6	7	6	4	9	8	19	19	19	89.321	806	806;115;160	0	22.299	By MS/MS	By MS/MS	By MS/MS
P55081	P55081	2	2	2	Microfibrillar-associated protein 1	MFAP1	sp|P55081|MFAP1_HUMAN Microfibrillar-associated protein 1 OS=Homo sapiens GN=MFAP1 PE=1 SV=2	1	2	2	2	0	1	1	0	1	0	0	1	2	0	1	1	0	1	0	0	1	2	0	1	1	0	1	0	0	1	2	8.7	8.7	8.7	51.958	439	439	0	3.853		By matching	By matching
P55201;Q9ULD4	P55201	4;1	4;1	4;1	Peregrin	BRPF1	sp|P55201|BRPF1_HUMAN Peregrin OS=Homo sapiens GN=BRPF1 PE=1 SV=2	2	4	4	4	3	2	3	3	3	4	3	4	2	3	2	3	3	3	4	3	4	2	3	2	3	3	3	4	3	4	2	4.1	4.1	4.1	137.5	1214	1214;1205	0	10.174	By MS/MS	By MS/MS	By MS/MS
P55884;C9JZG1	P55884;C9JZG1	4;2	4;2	4;2	Eukaryotic translation initiation factor 3 subunit B	EIF3B	sp|P55884|EIF3B_HUMAN Eukaryotic translation initiation factor 3 subunit B OS=Homo sapiens GN=EIF3B PE=1 SV=3;tr|C9JZG1|C9JZG1_HUMAN Eukaryotic translation initiation factor 3 subunit B (Fragment) OS=Homo sapiens GN=EIF3B PE=1 SV=1	2	4	4	4	2	2	3	1	0	1	1	3	1	2	2	3	1	0	1	1	3	1	2	2	3	1	0	1	1	3	1	5.7	5.7	5.7	92.48	814	814;302	0	10.118	By matching	By MS/MS	By MS/MS
P56192;H0YI94;H0YIP0;H0YHV5;H0YIC2;H0YHL6;H0YI27;F5H2V6	P56192	5;2;2;2;1;1;1;1	5;2;2;2;1;1;1;1	5;2;2;2;1;1;1;1	Methionine--tRNA ligase, cytoplasmic	MARS	sp|P56192|SYMC_HUMAN Methionine--tRNA ligase, cytoplasmic OS=Homo sapiens GN=MARS PE=1 SV=2	8	5	5	5	4	4	4	5	3	3	5	4	3	4	4	4	5	3	3	5	4	3	4	4	4	5	3	3	5	4	3	6.1	6.1	6.1	101.11	900	900;119;219;233;58;81;124;140	0	16.354	By MS/MS	By MS/MS	By MS/MS
P56537;B7ZBH1;A0A0U1RQV5	P56537;B7ZBH1	3;2;1	3;2;1	3;2;1	Eukaryotic translation initiation factor 6	EIF6	sp|P56537|IF6_HUMAN Eukaryotic translation initiation factor 6 OS=Homo sapiens GN=EIF6 PE=1 SV=1;tr|B7ZBH1|B7ZBH1_HUMAN Eukaryotic translation initiation factor 6 (Fragment) OS=Homo sapiens GN=EIF6 PE=1 SV=1	3	3	3	3	1	1	2	2	1	1	3	2	0	1	1	2	2	1	1	3	2	0	1	1	2	2	1	1	3	2	0	17.1	17.1	17.1	26.599	245	245;108;110	0	8.1906	By MS/MS	By matching	By MS/MS
P57076;C9J818;H7C2R6;C9JX57;D3DSE6;F8VZ95;H7BZW1;Q9NX33	P57076;C9J818;H7C2R6;C9JX57;D3DSE6;F8VZ95;H7BZW1	4;3;2;2;2;2;2;1	4;3;2;2;2;2;2;1	4;3;2;2;2;2;2;1	UPF0769 protein C21orf59	C21orf59	sp|P57076|CU059_HUMAN UPF0769 protein C21orf59 OS=Homo sapiens GN=C21orf59 PE=1 SV=1;tr|C9J818|C9J818_HUMAN UPF0769 protein C21orf59 OS=Homo sapiens GN=C21orf59 PE=1 SV=1;tr|H7C2R6|H7C2R6_HUMAN UPF0769 protein C21orf59 (Fragment) OS=Homo sapiens GN=C21orf5	8	4	4	4	4	4	3	4	4	3	4	4	4	4	4	3	4	4	3	4	4	4	4	4	3	4	4	3	4	4	4	24.5	24.5	24.5	33.224	290	290;258;117;184;245;297;297;138	0	19.16	By MS/MS	By MS/MS	By MS/MS
P58546;C9JL85	P58546;C9JL85	4;2	4;2	4;2	Myotrophin	MTPN	sp|P58546|MTPN_HUMAN Myotrophin OS=Homo sapiens GN=MTPN PE=1 SV=2;tr|C9JL85|C9JL85_HUMAN Myotrophin OS=Homo sapiens GN=MTPN PE=1 SV=1	2	4	4	4	3	2	2	3	4	2	3	3	3	3	2	2	3	4	2	3	3	3	3	2	2	3	4	2	3	3	3	39.8	39.8	39.8	12.895	118	118;52	0	12.902	By MS/MS	By MS/MS	By MS/MS
P60174;U3KPZ0;U3KQF3;U3KPS5	P60174;U3KPZ0	20;10;9;3	20;10;9;3	20;10;9;3	Triosephosphate isomerase	TPI1	sp|P60174|TPIS_HUMAN Triosephosphate isomerase OS=Homo sapiens GN=TPI1 PE=1 SV=3;tr|U3KPZ0|U3KPZ0_HUMAN Triosephosphate isomerase (Fragment) OS=Homo sapiens GN=TPI1 PE=1 SV=1	4	20	20	20	19	19	20	19	20	20	20	20	20	19	19	20	19	20	20	20	20	20	19	19	20	19	20	20	20	20	20	78	78	78	30.791	286	286;113;98;39	0	211.55	By MS/MS	By MS/MS	By MS/MS
P60228;E5RGA2;H0YAW4;E5RHS5;H0YBR5;E5RIT4;E5RIP5;E5RJ25;E5RII3	P60228;E5RGA2	11;9;4;4;3;2;1;1;1	11;9;4;4;3;2;1;1;1	11;9;4;4;3;2;1;1;1	Eukaryotic translation initiation factor 3 subunit E	EIF3E	sp|P60228|EIF3E_HUMAN Eukaryotic translation initiation factor 3 subunit E OS=Homo sapiens GN=EIF3E PE=1 SV=1;tr|E5RGA2|E5RGA2_HUMAN Eukaryotic translation initiation factor 3 subunit E OS=Homo sapiens GN=EIF3E PE=1 SV=1	9	11	11	11	8	9	8	9	10	10	9	10	7	8	9	8	9	10	10	9	10	7	8	9	8	9	10	10	9	10	7	26.7	26.7	26.7	52.22	445	445;352;156;226;171;75;45;56;75	0	24.996	By MS/MS	By MS/MS	By MS/MS
P60468;S4R3B5	P60468	3;1	3;1	3;1	Protein transport protein Sec61 subunit beta	SEC61B	sp|P60468|SC61B_HUMAN Protein transport protein Sec61 subunit beta OS=Homo sapiens GN=SEC61B PE=1 SV=2	2	3	3	3	2	2	1	2	2	2	2	3	2	2	2	1	2	2	2	2	3	2	2	2	1	2	2	2	2	3	2	37.5	37.5	37.5	9.9743	96	96;42	0	9.0478	By MS/MS	By MS/MS	By MS/MS
P60709;G5E9R0;E7EVS6;C9JZR7;Q6S8J3;C9JTX5;C9JUM1;A5A3E0;Q562R1;P0CG38;Q9BYX7;P0CG39;F8WCH0	P60709	15;7;7;6;6;5;5;5;4;4;3;3;2	15;7;7;6;6;5;5;5;4;4;3;3;2	1;1;1;1;0;1;0;0;0;0;0;0;0	Actin, cytoplasmic 1;Actin, cytoplasmic 1, N-terminally processed	ACTB	sp|P60709|ACTB_HUMAN Actin, cytoplasmic 1 OS=Homo sapiens GN=ACTB PE=1 SV=1	13	15	15	1	15	14	15	14	15	15	15	15	15	15	14	15	14	15	15	15	15	15	1	1	1	1	1	1	1	1	1	52.3	52.3	4.5	41.736	375	375;125;164;103;1075;80;99;1075;376;1075;375;1038;52	0	118.77	By MS/MS	By MS/MS	By MS/MS
P60842;J3KT12;J3QS69;J3KTB5;J3KSZ0;J3QL43;J3QR64;E7EQG2;Q14240;J3KTN0;J3QLN6;J3KS25;J3QKZ9;J3QL52;J3KT04;J3KS93;E7EMV8;J3KSN7;J3QQP0;E9PBH4;F8WE11;C9JUF0	P60842;J3KT12;J3QS69;J3KTB5;J3KSZ0;J3QL43	18;15;13;12;11;10;8;8;8;7;7;7;6;3;3;3;3;3;2;2;2;1	18;15;13;12;11;10;8;8;8;7;7;7;6;3;3;3;3;3;2;2;2;1	15;12;10;10;10;7;6;5;5;6;5;5;4;2;1;1;1;1;0;0;0;0	Eukaryotic initiation factor 4A-I	EIF4A1	sp|P60842|IF4A1_HUMAN Eukaryotic initiation factor 4A-I OS=Homo sapiens GN=EIF4A1 PE=1 SV=1;tr|J3KT12|J3KT12_HUMAN Eukaryotic initiation factor 4A-I OS=Homo sapiens GN=EIF4A1 PE=1 SV=1;tr|J3QS69|J3QS69_HUMAN Eukaryotic initiation factor 4A-I (Fragment) OS=	22	18	18	15	18	16	18	15	17	17	17	18	17	18	16	18	15	17	17	17	18	17	15	15	15	14	15	15	15	15	15	42.9	42.9	36.9	46.153	406	406;341;300;257;230;271;214;362;407;117;163;188;135;68;85;85;98;109;95;96;97;57	0	86.909	By MS/MS	By MS/MS	By MS/MS
P60866;E5RJX2;G3XAN0	P60866;E5RJX2;G3XAN0	2;1;1	2;1;1	2;1;1	40S ribosomal protein S20	RPS20	sp|P60866|RS20_HUMAN 40S ribosomal protein S20 OS=Homo sapiens GN=RPS20 PE=1 SV=1;tr|E5RJX2|E5RJX2_HUMAN 40S ribosomal protein S20 OS=Homo sapiens GN=RPS20 PE=1 SV=1;tr|G3XAN0|G3XAN0_HUMAN 40S ribosomal protein S20 OS=Homo sapiens GN=RPS20 PE=1 SV=1	3	2	2	2	2	2	2	1	2	1	2	2	1	2	2	2	1	2	1	2	2	1	2	2	2	1	2	1	2	2	1	16	16	16	13.373	119	119;61;64	0	6.8185	By MS/MS	By MS/MS	By MS/MS
P60953;Q5JYX0;F8WET9;B1AH79;G3V4H1;G3V476;A0A0C4DH03;P84095;P17081;Q9H4E5	P60953;Q5JYX0	4;2;1;1;1;1;1;1;1;1	4;2;1;1;1;1;1;1;1;1	3;1;0;0;0;0;0;0;0;0	Cell division control protein 42 homolog	CDC42	sp|P60953|CDC42_HUMAN Cell division control protein 42 homolog OS=Homo sapiens GN=CDC42 PE=1 SV=2;tr|Q5JYX0|Q5JYX0_HUMAN Cell division control protein 42 homolog (Fragment) OS=Homo sapiens GN=CDC42 PE=1 SV=1	10	4	4	3	3	1	4	3	2	2	3	3	3	3	1	4	3	2	2	3	3	3	3	1	3	3	2	2	2	3	3	25.7	25.7	19.9	21.258	191	191;136;50;86;153;178;213;191;205;214	0	11.477	By MS/MS	By matching	By MS/MS
P60981;F6RFD5	P60981;F6RFD5	5;4	4;3	4;3	Destrin	DSTN	sp|P60981|DEST_HUMAN Destrin OS=Homo sapiens GN=DSTN PE=1 SV=3;tr|F6RFD5|F6RFD5_HUMAN Destrin OS=Homo sapiens GN=DSTN PE=1 SV=1	2	5	4	4	3	3	5	4	2	4	5	3	4	2	3	4	3	2	4	4	3	3	2	3	4	3	2	4	4	3	3	29.7	25.5	25.5	18.506	165	165;135	0	14.377	By MS/MS	By MS/MS	By MS/MS
P61019;Q5HYI5;Q8WUD1;E9PKL7;H7C125;Q6PIK3	P61019;Q5HYI5;Q8WUD1;E9PKL7	4;3;3;2;1;1	4;3;3;2;1;1	4;3;3;2;1;1	Ras-related protein Rab-2A;Ras-related protein Rab-2B	RAB2A;DKFZp313C1541;RAB2B	sp|P61019|RAB2A_HUMAN Ras-related protein Rab-2A OS=Homo sapiens GN=RAB2A PE=1 SV=1;tr|Q5HYI5|Q5HYI5_HUMAN Putative uncharacterized protein DKFZp313C1541 OS=Homo sapiens GN=DKFZp313C1541 PE=1 SV=1;sp|Q8WUD1|RAB2B_HUMAN Ras-related protein Rab-2B OS=Homo sa	6	4	4	4	0	0	3	2	0	0	0	3	2	0	0	3	2	0	0	0	3	2	0	0	3	2	0	0	0	3	2	25.5	25.5	25.5	23.545	212	212;209;216;181;104;121	0	9.5509			By MS/MS
P61026;P51153;A0A087WWB9	P61026;P51153	4;2;1	3;1;1	3;1;1	Ras-related protein Rab-10;Ras-related protein Rab-13	RAB10;RAB13	sp|P61026|RAB10_HUMAN Ras-related protein Rab-10 OS=Homo sapiens GN=RAB10 PE=1 SV=1;sp|P51153|RAB13_HUMAN Ras-related protein Rab-13 OS=Homo sapiens GN=RAB13 PE=1 SV=1	3	4	3	3	3	3	4	3	3	2	2	3	3	2	2	3	2	2	1	1	2	2	2	2	3	2	2	1	1	2	2	20.5	15	15	22.541	200	200;203;122	0	7.4857	By matching	By matching	By MS/MS
P61081;M0QX69;M0QYI6	P61081	7;2;2	7;2;2	7;2;2	NEDD8-conjugating enzyme Ubc12	UBE2M	sp|P61081|UBC12_HUMAN NEDD8-conjugating enzyme Ubc12 OS=Homo sapiens GN=UBE2M PE=1 SV=1	3	7	7	7	6	6	7	6	7	6	5	6	5	6	6	7	6	7	6	5	6	5	6	6	7	6	7	6	5	6	5	41.5	41.5	41.5	20.9	183	183;70;114	0	21.45	By MS/MS	By MS/MS	By MS/MS
P61088;F8VZ29;F8VSD4;F8VV71;Q5JXB2;F8VQQ8	P61088;F8VZ29;F8VSD4;F8VV71;Q5JXB2	3;2;2;2;2;1	3;2;2;2;2;1	3;2;2;2;2;1	Ubiquitin-conjugating enzyme E2 N;Putative ubiquitin-conjugating enzyme E2 N-like	UBE2N;UBE2NL	sp|P61088|UBE2N_HUMAN Ubiquitin-conjugating enzyme E2 N OS=Homo sapiens GN=UBE2N PE=1 SV=1;tr|F8VZ29|F8VZ29_HUMAN Ubiquitin-conjugating enzyme E2 N OS=Homo sapiens GN=UBE2N PE=1 SV=1;tr|F8VSD4|F8VSD4_HUMAN Ubiquitin-conjugating enzyme E2 N OS=Homo sapiens	6	3	3	3	2	3	3	2	1	1	2	3	1	2	3	3	2	1	1	2	3	1	2	3	3	2	1	1	2	3	1	23.7	23.7	23.7	17.138	152	152;87;105;152;153;89	0	8.2033	By MS/MS	By MS/MS	By MS/MS
X6RFL8;P61106	X6RFL8;P61106	1;1	1;1	1;1	Ras-related protein Rab-14	RAB14	tr|X6RFL8|X6RFL8_HUMAN Ras-related protein Rab-14 (Fragment) OS=Homo sapiens GN=RAB14 PE=1 SV=1;sp|P61106|RAB14_HUMAN Ras-related protein Rab-14 OS=Homo sapiens GN=RAB14 PE=1 SV=4	2	1	1	1	0	1	1	1	1	1	1	1	1	0	1	1	1	1	1	1	1	1	0	1	1	1	1	1	1	1	1	7.7	7.7	7.7	20.409	181	181;215	0	9.8587		By matching	By matching
P61160;F5H6T1	P61160;F5H6T1	4;3	4;3	4;3	Actin-related protein 2	ACTR2	sp|P61160|ARP2_HUMAN Actin-related protein 2 OS=Homo sapiens GN=ACTR2 PE=1 SV=1;tr|F5H6T1|F5H6T1_HUMAN ARP2 actin-related protein 2 homolog (Yeast), isoform CRA_d OS=Homo sapiens GN=ACTR2 PE=1 SV=2	2	4	4	4	3	2	4	4	4	3	2	3	2	3	2	4	4	4	3	2	3	2	3	2	4	4	4	3	2	3	2	12.4	12.4	12.4	44.76	394	394;339	0	9.1821	By MS/MS	By MS/MS	By MS/MS
P84077;P61204;F5H423;F5H0C7;F5H1V1;F5H6T5;F8WDB3;H0YGG7	P84077;P61204;F5H423	5;5;4;2;1;1;1;1	3;3;2;0;0;0;0;1	2;2;1;0;0;0;0;1	ADP-ribosylation factor 1;ADP-ribosylation factor 3	ARF1;ARF3	sp|P84077|ARF1_HUMAN ADP-ribosylation factor 1 OS=Homo sapiens GN=ARF1 PE=1 SV=2;sp|P61204|ARF3_HUMAN ADP-ribosylation factor 3 OS=Homo sapiens GN=ARF3 PE=1 SV=2;tr|F5H423|F5H423_HUMAN Uncharacterized protein OS=Homo sapiens PE=3 SV=1	8	5	3	2	4	3	5	4	4	4	5	5	5	3	2	3	3	2	3	3	3	3	2	1	2	2	1	2	2	2	2	34.3	18.2	12.7	20.697	181	181;181;210;102;40;50;59;62	0	15.801	By MS/MS	By MS/MS	By MS/MS
P61221;D6R9I9;D6RGF4;H0Y990	P61221;D6R9I9;D6RGF4	10;9;5;2	10;9;5;2	10;9;5;2	ATP-binding cassette sub-family E member 1	ABCE1	sp|P61221|ABCE1_HUMAN ATP-binding cassette sub-family E member 1 OS=Homo sapiens GN=ABCE1 PE=1 SV=1;tr|D6R9I9|D6R9I9_HUMAN ATP-binding cassette sub-family E member 1 OS=Homo sapiens GN=ABCE1 PE=1 SV=1;tr|D6RGF4|D6RGF4_HUMAN ATP-binding cassette sub-family	4	10	10	10	8	9	9	9	9	10	10	9	7	8	9	9	9	9	10	10	9	7	8	9	9	9	9	10	10	9	7	23.5	23.5	23.5	67.314	599	599;421;210;147	0	31.644	By MS/MS	By MS/MS	By MS/MS
P61247;D6RG13;D6RAT0;E9PFI5;H0Y9Y4;H0Y8L7;D6RB09;D6R9B6;D6RAS7;D6RED7;D6RI02;D6RGE0	P61247;D6RG13;D6RAT0;E9PFI5;H0Y9Y4;H0Y8L7;D6RB09;D6R9B6	13;11;11;10;10;9;9;8;6;4;3;2	13;11;11;10;10;9;9;8;6;4;3;2	13;11;11;10;10;9;9;8;6;4;3;2	40S ribosomal protein S3a	RPS3A	sp|P61247|RS3A_HUMAN 40S ribosomal protein S3a OS=Homo sapiens GN=RPS3A PE=1 SV=2;tr|D6RG13|D6RG13_HUMAN 40S ribosomal protein S3a (Fragment) OS=Homo sapiens GN=RPS3A PE=1 SV=1;tr|D6RAT0|D6RAT0_HUMAN 40S ribosomal protein S3a OS=Homo sapiens GN=RPS3A PE=1	12	13	13	13	12	11	10	12	11	10	11	12	9	12	11	10	12	11	10	11	12	9	12	11	10	12	11	10	11	12	9	50.8	50.8	50.8	29.945	264	264;223;227;205;208;190;194;145;125;101;95;65	0	65.275	By MS/MS	By MS/MS	By MS/MS
P61254;J3QRI7;J3QQQ9;J3QQV1;J3QRC4;J3KTJ8;E5RIT6;J3KSS0;E5RHH1;J3KS10	P61254;J3QRI7;J3QQQ9;J3QQV1;J3QRC4;J3KTJ8;E5RIT6	8;7;7;7;7;6;6;3;2;2	8;7;7;7;7;6;6;3;2;2	2;1;1;1;1;1;0;1;0;0	60S ribosomal protein L26	RPL26;RPL26L1	sp|P61254|RL26_HUMAN 60S ribosomal protein L26 OS=Homo sapiens GN=RPL26 PE=1 SV=1;tr|J3QRI7|J3QRI7_HUMAN 60S ribosomal protein L26 (Fragment) OS=Homo sapiens GN=RPL26 PE=4 SV=1;tr|J3QQQ9|J3QQQ9_HUMAN Uncharacterized protein OS=Homo sapiens PE=4 SV=1;tr|J3Q	10	8	8	2	7	7	7	5	7	8	7	7	5	7	7	7	5	7	8	7	7	5	2	2	2	1	2	2	2	2	1	44.1	44.1	11.7	17.258	145	145;107;107;110;135;97;128;63;39;63	0	26.177	By MS/MS	By MS/MS	By MS/MS
P61313;E7EQV9;E7ENU7;E7EX53;E7ERA2	P61313;E7EQV9;E7ENU7;E7EX53	11;9;8;6;2	11;9;8;6;2	11;9;8;6;2	60S ribosomal protein L15;Ribosomal protein L15	RPL15	sp|P61313|RL15_HUMAN 60S ribosomal protein L15 OS=Homo sapiens GN=RPL15 PE=1 SV=2;tr|E7EQV9|E7EQV9_HUMAN Ribosomal protein L15 (Fragment) OS=Homo sapiens GN=RPL15 PE=1 SV=1;tr|E7ENU7|E7ENU7_HUMAN Ribosomal protein L15 (Fragment) OS=Homo sapiens GN=RPL15 PE	5	11	11	11	11	10	10	11	11	10	9	10	10	11	10	10	11	11	10	9	10	10	11	10	10	11	11	10	9	10	10	44.6	44.6	44.6	24.146	204	204;174;175;133;59	0	34.884	By MS/MS	By MS/MS	By MS/MS
P61353;K7ELC7;K7EQQ9;K7ERY7	P61353;K7ELC7	5;4;2;1	5;4;2;1	5;4;2;1	60S ribosomal protein L27	RPL27	sp|P61353|RL27_HUMAN 60S ribosomal protein L27 OS=Homo sapiens GN=RPL27 PE=1 SV=2;tr|K7ELC7|K7ELC7_HUMAN 60S ribosomal protein L27 (Fragment) OS=Homo sapiens GN=RPL27 PE=1 SV=1	4	5	5	5	5	5	5	5	5	5	5	5	5	5	5	5	5	5	5	5	5	5	5	5	5	5	5	5	5	5	5	41.9	41.9	41.9	15.798	136	136;144;80;40	0	35.477	By MS/MS	By MS/MS	By MS/MS
P61457	P61457	2	2	2	Pterin-4-alpha-carbinolamine dehydratase	PCBD1	sp|P61457|PHS_HUMAN Pterin-4-alpha-carbinolamine dehydratase OS=Homo sapiens GN=PCBD1 PE=1 SV=2	1	2	2	2	2	0	2	1	0	0	1	2	1	2	0	2	1	0	0	1	2	1	2	0	2	1	0	0	1	2	1	20.2	20.2	20.2	11.999	104	104	0	3.2399	By MS/MS		By matching
P61586;Q5JR07;C9JNR4;E9PQH6;C9JX21;Q5JR08;Q5JR05;P08134	P61586	3;1;1;1;1;1;1;1	3;1;1;1;1;1;1;1	3;1;1;1;1;1;1;1	Transforming protein RhoA	RHOA	sp|P61586|RHOA_HUMAN Transforming protein RhoA OS=Homo sapiens GN=RHOA PE=1 SV=1	8	3	3	3	2	2	3	3	3	3	1	3	3	2	2	3	3	3	3	1	3	3	2	2	3	3	3	3	1	3	3	19.7	19.7	19.7	21.768	193	193;127;129;169;187;189;199;193	0	17.83	By MS/MS	By MS/MS	By MS/MS
P61604;B8ZZ54;B8ZZL8;S4R3N1	P61604;B8ZZ54;B8ZZL8	3;2;2;1	3;2;2;1	3;2;2;1	10 kDa heat shock protein, mitochondrial	HSPE1	sp|P61604|CH10_HUMAN 10 kDa heat shock protein, mitochondrial OS=Homo sapiens GN=HSPE1 PE=1 SV=2;tr|B8ZZ54|B8ZZ54_HUMAN 10 kDa heat shock protein, mitochondrial OS=Homo sapiens GN=HSPE1 PE=1 SV=1;tr|B8ZZL8|B8ZZL8_HUMAN 10 kDa heat shock protein, mitochondr	4	3	3	3	3	3	3	3	3	3	3	3	2	3	3	3	3	3	3	3	3	2	3	3	3	3	3	3	3	3	2	35.3	35.3	35.3	10.932	102	102;47;101;261	0	9.2525	By MS/MS	By MS/MS	By MS/MS
P61978;Q5T6W2;S4R359;S4R457	P61978;Q5T6W2	13;9;3;1	13;9;3;1	13;9;3;1	Heterogeneous nuclear ribonucleoprotein K	HNRNPK	sp|P61978|HNRPK_HUMAN Heterogeneous nuclear ribonucleoprotein K OS=Homo sapiens GN=HNRNPK PE=1 SV=1;tr|Q5T6W2|Q5T6W2_HUMAN Heterogeneous nuclear ribonucleoprotein K (Fragment) OS=Homo sapiens GN=HNRNPK PE=1 SV=1	4	13	13	13	7	8	12	10	7	7	7	10	8	7	8	12	10	7	7	7	10	8	7	8	12	10	7	7	7	10	8	42.3	42.3	42.3	50.976	463	463;379;100;77	0	83.361	By MS/MS	By MS/MS	By MS/MS
P61981	P61981	6	3	3	14-3-3 protein gamma;14-3-3 protein gamma, N-terminally processed	YWHAG	sp|P61981|1433G_HUMAN 14-3-3 protein gamma OS=Homo sapiens GN=YWHAG PE=1 SV=2	1	6	3	3	6	5	6	4	5	4	5	6	4	3	2	3	2	2	1	2	3	1	3	2	3	2	2	1	2	3	1	23.9	13.8	13.8	28.302	247	247	0	10.794	By MS/MS	By MS/MS	By MS/MS
P62081;B5MCP9	P62081;B5MCP9	5;4	5;4	5;4	40S ribosomal protein S7	RPS7	sp|P62081|RS7_HUMAN 40S ribosomal protein S7 OS=Homo sapiens GN=RPS7 PE=1 SV=1;tr|B5MCP9|B5MCP9_HUMAN 40S ribosomal protein S7 OS=Homo sapiens GN=RPS7 PE=1 SV=1	2	5	5	5	5	4	5	5	5	5	5	5	5	5	4	5	5	5	5	5	5	5	5	4	5	5	5	5	5	5	5	41.2	41.2	41.2	22.127	194	194;187	0	35.96	By MS/MS	By MS/MS	By MS/MS
P62191;G3V4X1	P62191	6;1	6;1	6;1	26S protease regulatory subunit 4	PSMC1	sp|P62191|PRS4_HUMAN 26S protease regulatory subunit 4 OS=Homo sapiens GN=PSMC1 PE=1 SV=1	2	6	6	6	4	5	4	4	4	4	4	6	4	4	5	4	4	4	4	4	6	4	4	5	4	4	4	4	4	6	4	20.9	20.9	20.9	49.184	440	440;84	0	21.307	By MS/MS	By MS/MS	By MS/MS
P62241;Q5JR95	P62241;Q5JR95	8;7	8;7	8;7	40S ribosomal protein S8	RPS8	sp|P62241|RS8_HUMAN 40S ribosomal protein S8 OS=Homo sapiens GN=RPS8 PE=1 SV=2;tr|Q5JR95|Q5JR95_HUMAN 40S ribosomal protein S8 OS=Homo sapiens GN=RPS8 PE=1 SV=1	2	8	8	8	8	8	8	8	8	8	8	8	8	8	8	8	8	8	8	8	8	8	8	8	8	8	8	8	8	8	8	45.7	45.7	45.7	24.205	208	208;188	0	82.237	By MS/MS	By MS/MS	By MS/MS
P62244;I3L3P7;I3L246;H3BN98;H3BV27;H3BT37;I3L303;H3BVC7	P62244;I3L3P7;I3L246;H3BN98	4;3;2;2;1;1;1;1	4;3;2;2;1;1;1;1	4;3;2;2;1;1;1;1	40S ribosomal protein S15a	RPS15A	sp|P62244|RS15A_HUMAN 40S ribosomal protein S15a OS=Homo sapiens GN=RPS15A PE=1 SV=2;tr|I3L3P7|I3L3P7_HUMAN 40S ribosomal protein S15a OS=Homo sapiens GN=RPS15A PE=1 SV=1;tr|I3L246|I3L246_HUMAN 40S ribosomal protein S15a OS=Homo sapiens GN=RPS15A PE=1 SV=1	8	4	4	4	3	3	3	4	3	3	3	4	3	3	3	3	4	3	3	3	4	3	3	3	3	4	3	3	3	4	3	40	40	40	14.839	130	130;100;111;237;49;50;52;58	0	17.694	By MS/MS	By MS/MS	By MS/MS
P62249;M0R3H0;M0R210;A0A087WZ27;Q6IPX4;M0R1M5;M0QX76	P62249;M0R3H0;M0R210;A0A087WZ27;Q6IPX4;M0R1M5	5;4;4;4;4;3;2	5;4;4;4;4;3;2	5;4;4;4;4;3;2	40S ribosomal protein S16	RPS16;ZNF90	sp|P62249|RS16_HUMAN 40S ribosomal protein S16 OS=Homo sapiens GN=RPS16 PE=1 SV=2;tr|M0R3H0|M0R3H0_HUMAN 40S ribosomal protein S16 OS=Homo sapiens GN=RPS16 PE=1 SV=1;tr|M0R210|M0R210_HUMAN 40S ribosomal protein S16 OS=Homo sapiens GN=RPS16 PE=1 SV=1;tr|A0A	7	5	5	5	4	5	5	4	4	4	5	4	5	4	5	5	4	4	4	5	4	5	4	5	5	4	4	4	5	4	5	30.1	30.1	30.1	16.445	146	146;100;129;129;152;85;50	0	15.27	By MS/MS	By MS/MS	By MS/MS
P62258;B4DJF2;I3L3T1;K7EM20;K7EIT4;I3L0W5	P62258	16;5;5;5;4;3	13;3;3;4;3;2	13;3;3;4;3;2	14-3-3 protein epsilon	YWHAE	sp|P62258|1433E_HUMAN 14-3-3 protein epsilon OS=Homo sapiens GN=YWHAE PE=1 SV=1	6	16	13	13	15	14	15	13	15	14	15	15	14	12	11	12	11	12	11	12	12	11	12	11	12	11	12	11	12	12	11	66.7	56.9	56.9	29.174	255	255;94;107;115;109;38	0	73.978	By MS/MS	By MS/MS	By MS/MS
P62263;H0YB22;E5RH77	P62263;H0YB22;E5RH77	4;3;3	4;3;3	4;3;3	40S ribosomal protein S14	RPS14	sp|P62263|RS14_HUMAN 40S ribosomal protein S14 OS=Homo sapiens GN=RPS14 PE=1 SV=3;tr|H0YB22|H0YB22_HUMAN 40S ribosomal protein S14 (Fragment) OS=Homo sapiens GN=RPS14 PE=1 SV=1;tr|E5RH77|E5RH77_HUMAN 40S ribosomal protein S14 OS=Homo sapiens GN=RPS14 PE=1	3	4	4	4	4	4	4	3	2	2	3	4	2	4	4	4	3	2	2	3	4	2	4	4	4	3	2	2	3	4	2	34.4	34.4	34.4	16.273	151	151;120;134	0	24.868	By MS/MS	By MS/MS	By MS/MS
P62266;D6RD47;D6RDJ2;D6RIX0;D6R9I7	P62266;D6RD47;D6RDJ2;D6RIX0;D6R9I7	4;3;2;2;2	4;3;2;2;2	4;3;2;2;2	40S ribosomal protein S23	RPS23	sp|P62266|RS23_HUMAN 40S ribosomal protein S23 OS=Homo sapiens GN=RPS23 PE=1 SV=3;tr|D6RD47|D6RD47_HUMAN 40S ribosomal protein S23 OS=Homo sapiens GN=RPS23 PE=1 SV=1;tr|D6RDJ2|D6RDJ2_HUMAN 40S ribosomal protein S23 OS=Homo sapiens GN=RPS23 PE=1 SV=1;tr|D6R	5	4	4	4	4	4	4	4	4	4	4	4	4	4	4	4	4	4	4	4	4	4	4	4	4	4	4	4	4	4	4	28.7	28.7	28.7	15.807	143	143;134;55;85;123	0	12.42	By MS/MS	By MS/MS	By MS/MS
P62269;A0A0G2JQH2;Q5GGW2;J3JS69	P62269	7;2;2;2	7;2;2;2	7;2;2;2	40S ribosomal protein S18	RPS18	sp|P62269|RS18_HUMAN 40S ribosomal protein S18 OS=Homo sapiens GN=RPS18 PE=1 SV=3	4	7	7	7	6	6	6	6	6	6	5	7	6	6	6	6	6	6	6	5	7	6	6	6	6	6	6	6	5	7	6	43.4	43.4	43.4	17.718	152	152;33;34;82	0	22.703	By MS/MS	By MS/MS	By MS/MS
P62273	P62273	1	1	1	40S ribosomal protein S29	RPS29	sp|P62273|RS29_HUMAN 40S ribosomal protein S29 OS=Homo sapiens GN=RPS29 PE=1 SV=2	1	1	1	1	1	0	1	1	1	1	1	1	1	1	0	1	1	1	1	1	1	1	1	0	1	1	1	1	1	1	1	19.6	19.6	19.6	6.6767	56	56	0	4.3196	By matching		By MS/MS
P62277;J3KMX5;E9PS50	P62277;J3KMX5	5;4;2	5;4;2	5;4;2	40S ribosomal protein S13	RPS13	sp|P62277|RS13_HUMAN 40S ribosomal protein S13 OS=Homo sapiens GN=RPS13 PE=1 SV=2;tr|J3KMX5|J3KMX5_HUMAN 40S ribosomal protein S13 OS=Homo sapiens GN=RPS13 PE=1 SV=1	3	5	5	5	4	5	5	5	5	5	5	5	5	4	5	5	5	5	5	5	5	5	4	5	5	5	5	5	5	5	5	35.1	35.1	35.1	17.222	151	151;148;116	0	19.314	By MS/MS	By MS/MS	By MS/MS
P62280;M0QZC5;M0R1H6;M0R1H5	P62280;M0QZC5	8;7;3;2	8;7;3;2	8;7;3;2	40S ribosomal protein S11	RPS11	sp|P62280|RS11_HUMAN 40S ribosomal protein S11 OS=Homo sapiens GN=RPS11 PE=1 SV=3;tr|M0QZC5|M0QZC5_HUMAN 40S ribosomal protein S11 OS=Homo sapiens GN=RPS11 PE=1 SV=1	4	8	8	8	6	6	8	7	7	6	6	7	6	6	6	8	7	7	6	6	7	6	6	6	8	7	7	6	6	7	6	47.5	47.5	47.5	18.431	158	158;118;88;79	0	24.526	By MS/MS	By MS/MS	By MS/MS
P62304	P62304	1	1	1	Small nuclear ribonucleoprotein E	SNRPE	sp|P62304|RUXE_HUMAN Small nuclear ribonucleoprotein E OS=Homo sapiens GN=SNRPE PE=1 SV=1	1	1	1	1	1	1	1	1	1	1	1	1	1	1	1	1	1	1	1	1	1	1	1	1	1	1	1	1	1	1	1	12	12	12	10.803	92	92	0	3.8087	By MS/MS	By MS/MS	By MS/MS
P62306	P62306	1	1	1	Small nuclear ribonucleoprotein F	SNRPF	sp|P62306|RUXF_HUMAN Small nuclear ribonucleoprotein F OS=Homo sapiens GN=SNRPF PE=1 SV=1	1	1	1	1	1	1	1	1	1	1	1	1	1	1	1	1	1	1	1	1	1	1	1	1	1	1	1	1	1	1	1	14	14	14	9.7251	86	86	0	4.0624	By matching	By matching	By MS/MS
P62314;J3QLI9;J3QLR7	P62314;J3QLI9	3;2;1	3;2;1	3;2;1	Small nuclear ribonucleoprotein Sm D1	SNRPD1	sp|P62314|SMD1_HUMAN Small nuclear ribonucleoprotein Sm D1 OS=Homo sapiens GN=SNRPD1 PE=1 SV=1;tr|J3QLI9|J3QLI9_HUMAN Small nuclear ribonucleoprotein Sm D1 OS=Homo sapiens GN=SNRPD1 PE=1 SV=1	3	3	3	3	1	2	3	3	3	2	3	3	3	1	2	3	3	3	2	3	3	3	1	2	3	3	3	2	3	3	3	20.2	20.2	20.2	13.281	119	119;75;44	0	11.879	By matching	By matching	By MS/MS
P62316;K7ERG4;K7EJB5	P62316;K7ERG4	5;3;1	5;3;1	5;3;1	Small nuclear ribonucleoprotein Sm D2	SNRPD2	sp|P62316|SMD2_HUMAN Small nuclear ribonucleoprotein Sm D2 OS=Homo sapiens GN=SNRPD2 PE=1 SV=1;tr|K7ERG4|K7ERG4_HUMAN Small nuclear ribonucleoprotein Sm D2 OS=Homo sapiens GN=SNRPD2 PE=1 SV=1	3	5	5	5	4	3	4	3	4	4	4	2	3	4	3	4	3	4	4	4	2	3	4	3	4	3	4	4	4	2	3	45.8	45.8	45.8	13.527	118	118;78;54	0	12.469	By MS/MS	By MS/MS	By MS/MS
P62318;H3BT13	P62318	3;1	3;1	3;1	Small nuclear ribonucleoprotein Sm D3	SNRPD3	sp|P62318|SMD3_HUMAN Small nuclear ribonucleoprotein Sm D3 OS=Homo sapiens GN=SNRPD3 PE=1 SV=1	2	3	3	3	3	3	3	3	2	2	3	3	3	3	3	3	3	2	2	3	3	3	3	3	3	3	2	2	3	3	3	31.7	31.7	31.7	13.916	126	126;62	0	28.219	By MS/MS	By MS/MS	By MS/MS
P62424;Q5T8U3;Q5T8U2	P62424;Q5T8U3	12;9;4	12;9;4	12;9;4	60S ribosomal protein L7a	RPL7A	sp|P62424|RL7A_HUMAN 60S ribosomal protein L7a OS=Homo sapiens GN=RPL7A PE=1 SV=2;tr|Q5T8U3|Q5T8U3_HUMAN 60S ribosomal protein L7a (Fragment) OS=Homo sapiens GN=RPL7A PE=1 SV=1	3	12	12	12	12	12	12	12	12	12	11	12	11	12	12	12	12	12	12	11	12	11	12	12	12	12	12	12	11	12	11	38	38	38	29.995	266	266;191;151	0	58.894	By MS/MS	By MS/MS	By MS/MS
P62633	P62633	5	5	5	Cellular nucleic acid-binding protein	CNBP	sp|P62633|CNBP_HUMAN Cellular nucleic acid-binding protein OS=Homo sapiens GN=CNBP PE=1 SV=1	1	5	5	5	5	4	5	5	5	4	4	4	5	5	4	5	5	5	4	4	4	5	5	4	5	5	5	4	4	4	5	35	35	35	19.463	177	177	0	26.751	By MS/MS	By MS/MS	By MS/MS
P62701;C9JEH7;Q8TD47;P22090	P62701	12;5;5;5	12;5;5;5	12;5;5;5	40S ribosomal protein S4, X isoform	RPS4X	sp|P62701|RS4X_HUMAN 40S ribosomal protein S4, X isoform OS=Homo sapiens GN=RPS4X PE=1 SV=2	4	12	12	12	12	12	12	12	11	12	12	12	11	12	12	12	12	11	12	12	12	11	12	12	12	12	11	12	12	12	11	47.9	47.9	47.9	29.597	263	263;262;263;263	0	42.139	By MS/MS	By MS/MS	By MS/MS
P67775;P62714;H0YBN9;H0YC23;E5RHC1	P67775;P62714;H0YBN9;H0YC23;E5RHC1	2;2;1;1;1	2;2;1;1;1	2;2;1;1;1	Serine/threonine-protein phosphatase 2A catalytic subunit alpha isoform;Serine/threonine-protein phosphatase 2A catalytic subunit beta isoform;Serine/threonine-protein phosphatase	PPP2CA;PPP2CB	sp|P67775|PP2AA_HUMAN Serine/threonine-protein phosphatase 2A catalytic subunit alpha isoform OS=Homo sapiens GN=PPP2CA PE=1 SV=1;sp|P62714|PP2AB_HUMAN Serine/threonine-protein phosphatase 2A catalytic subunit beta isoform OS=Homo sapiens GN=PPP2CB PE=1 SV	5	2	2	2	0	0	1	1	1	1	1	1	0	0	0	1	1	1	1	1	1	0	0	0	1	1	1	1	1	1	0	10.4	10.4	10.4	35.594	309	309;309;52;124;184	0	3.4486			By MS/MS
P62753;A2A3R5;A2A3R7	P62753;A2A3R5	8;7;2	8;7;2	8;7;2	40S ribosomal protein S6	RPS6	sp|P62753|RS6_HUMAN 40S ribosomal protein S6 OS=Homo sapiens GN=RPS6 PE=1 SV=1;tr|A2A3R5|A2A3R5_HUMAN 40S ribosomal protein S6 OS=Homo sapiens GN=RPS6 PE=1 SV=1	3	8	8	8	8	8	8	8	8	8	8	8	7	8	8	8	8	8	8	8	8	7	8	8	8	8	8	8	8	8	7	32.5	32.5	32.5	28.68	249	249;218;91	0	73.411	By MS/MS	By MS/MS	By MS/MS
P62805	P62805	5	5	5	Histone H4	HIST1H4A	sp|P62805|H4_HUMAN Histone H4 OS=Homo sapiens GN=HIST1H4A PE=1 SV=2	1	5	5	5	4	3	4	4	3	5	5	4	4	4	3	4	4	3	5	5	4	4	4	3	4	4	3	5	5	4	4	50.5	50.5	50.5	11.367	103	103	0	17.92	By MS/MS	By MS/MS	By MS/MS
P62829;C9JD32;B9ZVP7;J3KT29;J3KTJ3	P62829;C9JD32;B9ZVP7;J3KT29	3;2;2;2;1	3;2;2;2;1	3;2;2;2;1	60S ribosomal protein L23	RPL23	sp|P62829|RL23_HUMAN 60S ribosomal protein L23 OS=Homo sapiens GN=RPL23 PE=1 SV=1;tr|C9JD32|C9JD32_HUMAN 60S ribosomal protein L23 (Fragment) OS=Homo sapiens GN=RPL23 PE=1 SV=1;tr|B9ZVP7|B9ZVP7_HUMAN 60S ribosomal protein L23 OS=Homo sapiens GN=RPL23 PE=1	5	3	3	3	3	3	3	3	2	2	3	3	3	3	3	3	3	2	2	3	3	3	3	3	3	3	2	2	3	3	3	25.7	25.7	25.7	14.865	140	140;91;114;122;81	0	7.3223	By MS/MS	By MS/MS	By MS/MS
P62851	P62851	5	5	5	40S ribosomal protein S25	RPS25	sp|P62851|RS25_HUMAN 40S ribosomal protein S25 OS=Homo sapiens GN=RPS25 PE=1 SV=1	1	5	5	5	5	5	5	5	5	5	5	5	5	5	5	5	5	5	5	5	5	5	5	5	5	5	5	5	5	5	5	29.6	29.6	29.6	13.742	125	125	0	15.136	By MS/MS	By MS/MS	By MS/MS
P62854;Q5JNZ5	P62854;Q5JNZ5	3;2	3;2	3;2	40S ribosomal protein S26;Putative 40S ribosomal protein S26-like 1	RPS26;RPS26P11	sp|P62854|RS26_HUMAN 40S ribosomal protein S26 OS=Homo sapiens GN=RPS26 PE=1 SV=3;sp|Q5JNZ5|RS26L_HUMAN Putative 40S ribosomal protein S26-like 1 OS=Homo sapiens GN=RPS26P11 PE=5 SV=1	2	3	3	3	3	3	3	3	3	3	3	3	3	3	3	3	3	3	3	3	3	3	3	3	3	3	3	3	3	3	3	27	27	27	13.015	115	115;115	0	19.51	By MS/MS	By MS/MS	By MS/MS
P62857	P62857	2	2	2	40S ribosomal protein S28	RPS28	sp|P62857|RS28_HUMAN 40S ribosomal protein S28 OS=Homo sapiens GN=RPS28 PE=1 SV=1	1	2	2	2	2	2	2	2	1	2	2	2	2	2	2	2	2	1	2	2	2	2	2	2	2	2	1	2	2	2	2	30.4	30.4	30.4	7.8409	69	69	0	5.7849	By matching	By MS/MS	By matching
Q59GN2;P62891	Q59GN2;P62891	2;2	2;2	2;2	Putative 60S ribosomal protein L39-like 5;60S ribosomal protein L39	RPL39P5;RPL39	sp|Q59GN2|R39L5_HUMAN Putative 60S ribosomal protein L39-like 5 OS=Homo sapiens GN=RPL39P5 PE=5 SV=2;sp|P62891|RL39_HUMAN 60S ribosomal protein L39 OS=Homo sapiens GN=RPL39 PE=1 SV=2	2	2	2	2	2	2	2	2	1	2	2	2	1	2	2	2	2	1	2	2	2	1	2	2	2	2	1	2	2	2	1	19.6	19.6	19.6	6.3225	51	51;51	0	5.9747	By MS/MS	By MS/MS	By MS/MS
P62899;H7C2W9;C9JU56;B7Z4E3;B7Z4C8;B8ZZK4	P62899;H7C2W9;C9JU56;B7Z4E3;B7Z4C8;B8ZZK4	5;4;4;4;4;3	5;4;4;4;4;3	5;4;4;4;4;3	60S ribosomal protein L31	RPL31	sp|P62899|RL31_HUMAN 60S ribosomal protein L31 OS=Homo sapiens GN=RPL31 PE=1 SV=1;tr|H7C2W9|H7C2W9_HUMAN 60S ribosomal protein L31 (Fragment) OS=Homo sapiens GN=RPL31 PE=1 SV=1;tr|C9JU56|C9JU56_HUMAN 60S ribosomal protein L31 (Fragment) OS=Homo sapiens GN=	6	5	5	5	5	5	5	5	5	5	5	5	5	5	5	5	5	5	5	5	5	5	5	5	5	5	5	5	5	5	5	38.4	38.4	38.4	14.463	125	125;108;115;120;130;79	0	18.9	By MS/MS	By MS/MS	By MS/MS
P62906	P62906	5	5	5	60S ribosomal protein L10a	RPL10A	sp|P62906|RL10A_HUMAN 60S ribosomal protein L10a OS=Homo sapiens GN=RPL10A PE=1 SV=2	1	5	5	5	5	5	5	5	4	5	5	5	5	5	5	5	5	4	5	5	5	5	5	5	5	5	4	5	5	5	5	27.2	27.2	27.2	24.831	217	217	0	19.076	By MS/MS	By MS/MS	By MS/MS
P62913;Q5VVC9;Q5VVC8	P62913;Q5VVC9;Q5VVC8	4;3;3	4;3;3	4;3;3	60S ribosomal protein L11	RPL11	sp|P62913|RL11_HUMAN 60S ribosomal protein L11 OS=Homo sapiens GN=RPL11 PE=1 SV=2;tr|Q5VVC9|Q5VVC9_HUMAN 60S ribosomal protein L11 (Fragment) OS=Homo sapiens GN=RPL11 PE=1 SV=1;tr|Q5VVC8|Q5VVC8_HUMAN 60S ribosomal protein L11 (Fragment) OS=Homo sapiens GN=	3	4	4	4	4	4	4	3	3	4	4	3	3	4	4	4	3	3	4	4	3	3	4	4	4	3	3	4	4	3	3	21.3	21.3	21.3	20.252	178	178;131;174	0	14.223	By MS/MS	By MS/MS	By MS/MS
P62917;G3V1A1;E9PKZ0;E9PKU4;E9PP36	P62917;G3V1A1;E9PKZ0;E9PKU4	5;4;4;4;2	5;4;4;4;2	5;4;4;4;2	60S ribosomal protein L8	RPL8	sp|P62917|RL8_HUMAN 60S ribosomal protein L8 OS=Homo sapiens GN=RPL8 PE=1 SV=2;tr|G3V1A1|G3V1A1_HUMAN 60S ribosomal protein L8 OS=Homo sapiens GN=RPL8 PE=1 SV=1;tr|E9PKZ0|E9PKZ0_HUMAN 60S ribosomal protein L8 (Fragment) OS=Homo sapiens GN=RPL8 PE=1 SV=1;tr	5	5	5	5	5	5	5	5	5	5	5	5	5	5	5	5	5	5	5	5	5	5	5	5	5	5	5	5	5	5	5	31.9	31.9	31.9	28.024	257	257;167;205;235;148	0	54.081	By MS/MS	By MS/MS	By MS/MS
P62937;F8WE65;C9J5S7;P0DN26;A0A0H2UH34;A0A0B4J2A2;A0A075B767;A0A075B759;Q9Y536;F5H284;P0DN37	P62937	7;3;3;2;2;2;2;2;2;2;1	7;3;3;2;2;2;2;2;2;2;1	7;3;3;2;2;2;2;2;2;2;1	Peptidyl-prolyl cis-trans isomerase A;Peptidyl-prolyl cis-trans isomerase A, N-terminally processed	PPIA	sp|P62937|PPIA_HUMAN Peptidyl-prolyl cis-trans isomerase A OS=Homo sapiens GN=PPIA PE=1 SV=2	11	7	7	7	6	5	5	6	5	5	6	5	5	6	5	5	6	5	5	6	5	5	6	5	5	6	5	5	6	5	5	37	37	37	18.012	165	165;120;121;164;164;164;164;164;164;164;164	0	24.152	By MS/MS	By MS/MS	By MS/MS
Q1JUQ5;Q5W0X3;P62942;Q5VVH2;A0A087WZM5	Q1JUQ5;Q5W0X3;P62942;Q5VVH2;A0A087WZM5	2;2;2;1;1	2;2;2;1;1	2;2;2;1;1	Peptidyl-prolyl cis-trans isomerase;Peptidyl-prolyl cis-trans isomerase FKBP1A	FKBP12-Exip2;FKBP1A;FKBP1C	tr|Q1JUQ5|Q1JUQ5_HUMAN Peptidyl-prolyl cis-trans isomerase OS=Homo sapiens GN=FKBP12-Exip2 PE=1 SV=1;tr|Q5W0X3|Q5W0X3_HUMAN Peptidyl-prolyl cis-trans isomerase OS=Homo sapiens GN=FKBP1A PE=1 SV=1;sp|P62942|FKB1A_HUMAN Peptidyl-prolyl cis-trans isomerase FK	5	2	2	2	2	2	1	2	2	2	2	2	2	2	2	1	2	2	2	2	2	2	2	2	1	2	2	2	2	2	2	26.1	26.1	26.1	10.118	92	92;103;108;108;129	0	7.6471	By MS/MS	By MS/MS	By MS/MS
P62979;J3QS39;J3QTR3;F5H6Q2;F5GYU3;F5H2Z3;F5H265;B4DV12;F5H388;F5H747;F5GXK7;J3QKN0;Q5PY61;Q96C32;P62987;P0CG47;P0CG48;M0R1V7;M0R1M6;M0R2S1;J3QSA3;F5GZ39	P62979;J3QS39;J3QTR3;F5H6Q2;F5GYU3;F5H2Z3;F5H265;B4DV12;F5H388;F5H747;F5GXK7;J3QKN0;Q5PY61;Q96C32;P62987;P0CG47;P0CG48	7;4;4;4;4;4;4;4;4;4;4;4;4;4;4;4;4;3;3;3;2;2	7;4;4;4;4;4;4;4;4;4;4;4;4;4;4;4;4;3;3;3;2;2	7;4;4;4;4;4;4;4;4;4;4;4;4;4;4;4;4;3;3;3;2;2	Ubiquitin-40S ribosomal protein S27a;Ubiquitin;40S ribosomal protein S27a;Ubiquitin-60S ribosomal protein L40;Ubiquitin;60S ribosomal protein L40;Polyubiquitin-B;Ubiquitin;Polyubiquitin-C;Ubiquitin	RPS27A;UBB;UBC;UBA52	sp|P62979|RS27A_HUMAN Ubiquitin-40S ribosomal protein S27a OS=Homo sapiens GN=RPS27A PE=1 SV=2;tr|J3QS39|J3QS39_HUMAN Polyubiquitin-B (Fragment) OS=Homo sapiens GN=UBB PE=1 SV=1;tr|J3QTR3|J3QTR3_HUMAN Ubiquitin-40S ribosomal protein S27a (Fragment) OS=Homo	22	7	7	7	7	7	7	7	7	7	7	7	7	7	7	7	7	7	7	7	7	7	7	7	7	7	7	7	7	7	7	53.8	53.8	53.8	17.965	156	156;93;106;123;134;136;149;153;155;161;169;206;229;305;128;229;685;63;114;138;43;61	0	66.803	By MS/MS	By MS/MS	By MS/MS
P62993;J3KT38;J3QRL5;J3QLF6	P62993	11;5;4;1	11;5;4;1	11;5;4;1	Growth factor receptor-bound protein 2	GRB2	sp|P62993|GRB2_HUMAN Growth factor receptor-bound protein 2 OS=Homo sapiens GN=GRB2 PE=1 SV=1	4	11	11	11	8	9	10	8	10	9	10	10	10	8	9	10	8	10	9	10	10	10	8	9	10	8	10	9	10	10	10	52.5	52.5	52.5	25.206	217	217;111;156;42	0	40.046	By MS/MS	By MS/MS	By MS/MS
P62995;H7C2L4;H7BXF3	P62995;H7C2L4;H7BXF3	11;6;6	11;6;6	10;6;5	Transformer-2 protein homolog beta	TRA2B	sp|P62995|TRA2B_HUMAN Transformer-2 protein homolog beta OS=Homo sapiens GN=TRA2B PE=1 SV=1;tr|H7C2L4|H7C2L4_HUMAN Transformer-2 protein homolog beta (Fragment) OS=Homo sapiens GN=TRA2B PE=1 SV=1;tr|H7BXF3|H7BXF3_HUMAN Transformer-2 protein homolog beta (F	3	11	11	10	11	10	11	10	10	10	9	10	10	11	10	11	10	10	10	9	10	10	10	9	10	9	9	9	8	9	9	44.4	44.4	41.3	33.665	288	288;107;127	0	49.688	By MS/MS	By MS/MS	By MS/MS
P63000;P60763;P15153;J3KSC4;J3QLK0;B1AH77;B1AH78;B1AH80	P63000;P60763;P15153;J3KSC4;J3QLK0;B1AH77;B1AH78;B1AH80	4;3;3;2;2;2;2;2	3;2;2;2;2;2;1;2	3;2;2;2;2;2;1;2	Ras-related C3 botulinum toxin substrate 1;Ras-related C3 botulinum toxin substrate 3;Ras-related C3 botulinum toxin substrate 2	RAC1;RAC3;RAC2	sp|P63000|RAC1_HUMAN Ras-related C3 botulinum toxin substrate 1 OS=Homo sapiens GN=RAC1 PE=1 SV=1;sp|P60763|RAC3_HUMAN Ras-related C3 botulinum toxin substrate 3 OS=Homo sapiens GN=RAC3 PE=1 SV=1;sp|P15153|RAC2_HUMAN Ras-related C3 botulinum toxin substrat	8	4	3	3	0	0	2	1	3	1	1	1	0	0	0	1	1	3	1	0	1	0	0	0	1	1	3	1	0	1	0	26	20.3	20.3	21.45	192	192;192;192;130;136;148;166;185	0	6.4696			By matching
P63104;E7EX29;B0AZS6;E7ESK7;B7Z2E6;H0YB80;E9PD24;E7EVZ2;E5RIR4;E5RGE1	P63104;E7EX29;B0AZS6;E7ESK7	17;15;11;9;8;8;7;7;6;5	17;15;11;9;8;8;7;7;6;5	12;10;8;7;5;5;5;5;4;3	14-3-3 protein zeta/delta	YWHAZ	sp|P63104|1433Z_HUMAN 14-3-3 protein zeta/delta OS=Homo sapiens GN=YWHAZ PE=1 SV=1;tr|E7EX29|E7EX29_HUMAN 14-3-3 protein zeta/delta (Fragment) OS=Homo sapiens GN=YWHAZ PE=1 SV=1;tr|B0AZS6|B0AZS6_HUMAN 14-3-3 protein zeta/delta OS=Homo sapiens GN=YWHAZ PE=1	10	17	17	12	16	16	17	16	16	16	16	17	16	16	16	17	16	16	16	16	17	16	11	11	12	12	11	11	11	12	11	63.7	63.7	49.4	27.745	245	245;246;168;137;125;130;92;98;75;52	0	135.63	By MS/MS	By MS/MS	By MS/MS
P63173;J3KT73;J3QL01;J3KSP2	P63173;J3KT73;J3QL01;J3KSP2	4;3;3;2	4;3;3;2	4;3;3;2	60S ribosomal protein L38	RPL38	sp|P63173|RL38_HUMAN 60S ribosomal protein L38 OS=Homo sapiens GN=RPL38 PE=1 SV=2;tr|J3KT73|J3KT73_HUMAN 60S ribosomal protein L38 OS=Homo sapiens GN=RPL38 PE=1 SV=1;tr|J3QL01|J3QL01_HUMAN 60S ribosomal protein L38 OS=Homo sapiens GN=RPL38 PE=1 SV=1;tr|J3K	4	4	4	4	3	2	3	2	3	2	3	3	2	3	2	3	2	3	2	3	3	2	3	2	3	2	3	2	3	3	2	47.1	47.1	47.1	8.2178	70	70;64;67;21	0	8.7433	By MS/MS	By MS/MS	By MS/MS
P63244;J3KPE3;H0Y8W2;H0YAF8;H0YAM7;D6RAC2;D6REE5;D6RFX4;D6RHH4;D6R9Z1;D6R9L0;H0Y9P0;D6RF23;D6RFZ9;H0Y8R5;D6RAU2;E9PD14;D6RBD0;D6RGK8;D6RHJ5;D6R909	P63244;J3KPE3;H0Y8W2;H0YAF8;H0YAM7;D6RAC2;D6REE5;D6RFX4;D6RHH4;D6R9Z1;D6R9L0	7;6;6;5;5;5;5;4;4;4;4;3;3;3;2;2;2;2;1;1;1	7;6;6;5;5;5;5;4;4;4;4;3;3;3;2;2;2;2;1;1;1	7;6;6;5;5;5;5;4;4;4;4;3;3;3;2;2;2;2;1;1;1	Guanine nucleotide-binding protein subunit beta-2-like 1;Guanine nucleotide-binding protein subunit beta-2-like 1, N-terminally processed	GNB2L1	sp|P63244|RACK1_HUMAN Receptor of activated protein C kinase 1 OS=Homo sapiens GN=RACK1 PE=1 SV=3;tr|J3KPE3|J3KPE3_HUMAN Receptor of-activated protein C kinase 1 OS=Homo sapiens GN=RACK1 PE=1 SV=1;tr|H0Y8W2|H0Y8W2_HUMAN Receptor of-activated protein C kina	21	7	7	7	6	5	7	5	6	5	7	7	6	6	5	7	5	6	5	7	7	6	6	5	7	5	6	5	7	7	6	29	29	29	35.076	317	317;273;274;198;247;269;321;194;233;237;300;83;101;198;138;147;153;160;71;86;116	0	29.021	By MS/MS	By MS/MS	By MS/MS
P63261;I3L3I0;I3L1U9;I3L4N8;K7EM38;I3L3R2;J3KT65	P63261;I3L3I0;I3L1U9;I3L4N8	15;9;9;8;7;7;7	1;1;1;1;1;1;1	1;1;1;1;1;1;1	Actin, cytoplasmic 2;Actin, cytoplasmic 2, N-terminally processed	ACTG1	sp|P63261|ACTG_HUMAN Actin, cytoplasmic 2 OS=Homo sapiens GN=ACTG1 PE=1 SV=1;tr|I3L3I0|I3L3I0_HUMAN Actin, cytoplasmic 2 (Fragment) OS=Homo sapiens GN=ACTG1 PE=1 SV=1;tr|I3L1U9|I3L1U9_HUMAN Actin, cytoplasmic 2 (Fragment) OS=Homo sapiens GN=ACTG1 PE=1 SV=1	7	15	1	1	14	14	15	14	15	14	15	15	15	0	1	1	1	1	0	1	1	1	0	1	1	1	1	0	1	1	1	52.3	4.5	4.5	41.792	375	375;214;214;242;133;164;198	0	10.834	By matching	By MS/MS	By MS/MS
P63313	P63313	1	1	1	Thymosin beta-10	TMSB10	sp|P63313|TYB10_HUMAN Thymosin beta-10 OS=Homo sapiens GN=TMSB10 PE=1 SV=2	1	1	1	1	1	1	1	1	1	1	1	1	1	1	1	1	1	1	1	1	1	1	1	1	1	1	1	1	1	1	1	31.8	31.8	31.8	5.0256	44	44	0	5.1727	By MS/MS	By MS/MS	By MS/MS
P67809;A0A087X1S2;H0Y449;C9J5V9	P67809;A0A087X1S2;H0Y449	13;11;11;5	13;11;11;5	10;8;9;4	Nuclease-sensitive element-binding protein 1	YBX1	sp|P67809|YBOX1_HUMAN Nuclease-sensitive element-binding protein 1 OS=Homo sapiens GN=YBX1 PE=1 SV=3;tr|A0A087X1S2|A0A087X1S2_HUMAN Nuclease-sensitive element-binding protein 1 OS=Homo sapiens GN=YBX1 PE=1 SV=2;tr|H0Y449|H0Y449_HUMAN Nuclease-sensitive ele	4	13	13	10	13	13	13	13	13	13	12	13	12	13	13	13	13	13	13	12	13	12	10	10	10	10	10	10	10	10	9	60.8	60.8	49.7	35.924	324	324;320;374;216	0	206.74	By MS/MS	By MS/MS	By MS/MS
P67936;K7ENT6;K7ERG3;K7EMU5;K7EPV9;U3KQK2;K7EPB9;Q2TAC2	P67936;K7ENT6;K7ERG3	13;9;7;6;5;4;3;1	6;3;1;3;3;2;2;1	4;1;0;1;1;0;1;1	Tropomyosin alpha-4 chain	TPM4	sp|P67936|TPM4_HUMAN Tropomyosin alpha-4 chain OS=Homo sapiens GN=TPM4 PE=1 SV=3;tr|K7ENT6|K7ENT6_HUMAN Tropomyosin alpha-4 chain (Fragment) OS=Homo sapiens GN=TPM4 PE=1 SV=1;tr|K7ERG3|K7ERG3_HUMAN Tropomyosin alpha-4 chain (Fragment) OS=Homo sapiens GN=TP	8	13	6	4	11	11	12	12	11	12	10	11	12	4	4	5	5	4	5	3	4	5	2	2	3	3	2	3	1	2	3	43.5	21.4	13.7	28.521	248	248;179;170;102;96;111;110;916	0	22.769	By MS/MS	By MS/MS	By MS/MS
P68133;P68032;P63267;P62736;A6NL76;F8WB63;B8ZZJ2;C9JFL5;F6UVQ4;F6QUT6	P68133;P68032;P63267;P62736;A6NL76;F8WB63;B8ZZJ2;C9JFL5;F6UVQ4;F6QUT6	10;10;9;9;8;5;5;5;5;5	1;1;1;1;1;1;1;1;1;1	1;1;1;1;1;1;1;1;1;1	Actin, alpha skeletal muscle;Actin, alpha cardiac muscle 1;Actin, gamma-enteric smooth muscle;Actin, aortic smooth muscle	ACTA1;ACTC1;ACTG2;ACTA2	sp|P68133|ACTS_HUMAN Actin, alpha skeletal muscle OS=Homo sapiens GN=ACTA1 PE=1 SV=1;sp|P68032|ACTC_HUMAN Actin, alpha cardiac muscle 1 OS=Homo sapiens GN=ACTC1 PE=1 SV=1;sp|P63267|ACTH_HUMAN Actin, gamma-enteric smooth muscle OS=Homo sapiens GN=ACTG2 PE=1	10	10	1	1	10	9	10	9	10	10	10	10	10	1	1	1	1	1	1	1	1	1	1	1	1	1	1	1	1	1	1	29.2	4.2	4.2	42.051	377	377;377;376;377;254;105;119;145;151;151	0	5.0347	By MS/MS	By MS/MS	By MS/MS
P68036	P68036	1	1	1	Ubiquitin-conjugating enzyme E2 L3	UBE2L3	sp|P68036|UB2L3_HUMAN Ubiquitin-conjugating enzyme E2 L3 OS=Homo sapiens GN=UBE2L3 PE=1 SV=1	1	1	1	1	1	1	1	1	1	1	1	1	1	1	1	1	1	1	1	1	1	1	1	1	1	1	1	1	1	1	1	14.3	14.3	14.3	17.861	154	154	0	3.3343	By matching	By matching	By MS/MS
P68104;Q5VTE0;A0A087WVQ9;A0A087WV01;A6PW80;Q5JR01	P68104;Q5VTE0;A0A087WVQ9;A0A087WV01	19;18;16;14;3;3	19;18;16;14;3;3	11;11;10;8;1;1	Elongation factor 1-alpha 1;Putative elongation factor 1-alpha-like 3;Elongation factor 1-alpha	EEF1A1;EEF1A1P5	sp|P68104|EF1A1_HUMAN Elongation factor 1-alpha 1 OS=Homo sapiens GN=EEF1A1 PE=1 SV=1;sp|Q5VTE0|EF1A3_HUMAN Putative elongation factor 1-alpha-like 3 OS=Homo sapiens GN=EEF1A1P5 PE=5 SV=1;tr|A0A087WVQ9|A0A087WVQ9_HUMAN Elongation factor 1-alpha 1 OS=Homo s	6	19	19	11	17	18	19	16	17	17	18	18	17	17	18	19	16	17	17	18	18	17	10	10	11	9	10	10	10	10	10	46.3	46.3	25.5	50.14	462	462;462;441;426;107;145	0	149.79	By MS/MS	By MS/MS	By MS/MS
P68363;Q71U36;P68366;Q13748;Q6PEY2;C9J2C0;Q9NY65;C9JDS9;V9GZ17	P68363;Q71U36;P68366;Q13748;Q6PEY2	17;15;13;12;9;8;8;5;3	17;15;13;12;9;8;8;5;3	3;2;3;2;2;1;1;1;1	Tubulin alpha-1B chain;Tubulin alpha-1A chain;Tubulin alpha-4A chain;Tubulin alpha-3C/D chain;Tubulin alpha-3E chain	TUBA1B;TUBA1A;TUBA4A;TUBA3C;TUBA3E	sp|P68363|TBA1B_HUMAN Tubulin alpha-1B chain OS=Homo sapiens GN=TUBA1B PE=1 SV=1;sp|Q71U36|TBA1A_HUMAN Tubulin alpha-1A chain OS=Homo sapiens GN=TUBA1A PE=1 SV=1;sp|P68366|TBA4A_HUMAN Tubulin alpha-4A chain OS=Homo sapiens GN=TUBA4A PE=1 SV=1;sp|Q13748|TBA	9	17	17	3	14	15	16	14	16	17	16	16	16	14	15	16	14	16	17	16	16	16	3	3	3	2	3	3	3	3	3	51.7	51.7	12	50.151	451	451;451;448;450;450;467;449;156;275	0	154.12	By MS/MS	By MS/MS	By MS/MS
P68371;P04350;Q3ZCM7;K7ESM5;A0A075B736;Q5SQY0;A6NNZ2;Q9BUF5;M0QY85;M0R2D3;M0QZL7;M0R278;M0R0X0;M0QY37;M0QX14;M0R042;M0QYM7;M0R2T4;A0A075B724	P68371;P04350	16;13;6;5;5;5;5;5;3;3;3;3;2;2;2;2;2;1;1	4;3;1;0;0;0;0;0;2;1;2;2;2;2;2;1;1;1;1	3;2;1;0;0;0;0;0;2;1;2;2;2;2;2;1;1;1;1	Tubulin beta-4B chain;Tubulin beta-4A chain	TUBB4B;TUBB4A	sp|P68371|TBB4B_HUMAN Tubulin beta-4B chain OS=Homo sapiens GN=TUBB4B PE=1 SV=1;sp|P04350|TBB4A_HUMAN Tubulin beta-4A chain OS=Homo sapiens GN=TUBB4A PE=1 SV=2	19	16	4	3	16	16	16	14	14	15	15	16	14	4	4	4	3	3	3	3	4	3	3	3	3	2	2	2	2	3	2	47.6	13.3	9.9	49.83	445	445;444;444;338;407;410;444;446;107;155;158;167;103;109;110;144;161;104;119	0	22.955	By MS/MS	By MS/MS	By MS/MS
P78344;H0Y3P2;D3DQV9;E9PKF8;H0YE22;H0YCH5	P78344;H0Y3P2;D3DQV9	3;2;2;1;1;1	3;2;2;1;1;1	3;2;2;1;1;1	Eukaryotic translation initiation factor 4 gamma 2	EIF4G2	sp|P78344|IF4G2_HUMAN Eukaryotic translation initiation factor 4 gamma 2 OS=Homo sapiens GN=EIF4G2 PE=1 SV=1;tr|H0Y3P2|H0Y3P2_HUMAN Eukaryotic translation initiation factor 4 gamma 2 OS=Homo sapiens GN=EIF4G2 PE=1 SV=1;tr|D3DQV9|D3DQV9_HUMAN Eukaryotic tra	6	3	3	3	1	3	2	2	1	2	3	2	1	1	3	2	2	1	2	3	2	1	1	3	2	2	1	2	3	2	1	4	4	4	102.36	907	907;869;907;186;234;444	0	8.867	By matching	By matching	By MS/MS
P78371;F8VQ14;F5GWF6	P78371;F8VQ14;F5GWF6	14;12;12	14;12;12	14;12;12	T-complex protein 1 subunit beta	CCT2	sp|P78371|TCPB_HUMAN T-complex protein 1 subunit beta OS=Homo sapiens GN=CCT2 PE=1 SV=4;tr|F8VQ14|F8VQ14_HUMAN T-complex protein 1 subunit beta OS=Homo sapiens GN=CCT2 PE=1 SV=1;tr|F5GWF6|F5GWF6_HUMAN T-complex protein 1 subunit beta OS=Homo sapiens GN=CCT	3	14	14	14	12	12	14	14	13	13	12	14	10	12	12	14	14	13	13	12	14	10	12	12	14	14	13	13	12	14	10	34.2	34.2	34.2	57.488	535	535;416;530	0	47.777	By MS/MS	By MS/MS	By MS/MS
P78417;Q5TA02;Q5TA01	P78417;Q5TA02;Q5TA01	7;6;5	7;6;5	7;6;5	Glutathione S-transferase omega-1	GSTO1	sp|P78417|GSTO1_HUMAN Glutathione S-transferase omega-1 OS=Homo sapiens GN=GSTO1 PE=1 SV=2;tr|Q5TA02|Q5TA02_HUMAN Glutathione S-transferase omega-1 (Fragment) OS=Homo sapiens GN=GSTO1 PE=1 SV=1;tr|Q5TA01|Q5TA01_HUMAN Glutathione S-transferase omega-1 (Frag	3	7	7	7	4	4	7	6	4	4	7	6	5	4	4	7	6	4	4	7	6	5	4	4	7	6	4	4	7	6	5	29.5	29.5	29.5	27.566	241	241;200;180	0	17.357	By MS/MS	By MS/MS	By MS/MS
P78527	P78527	9	9	9	DNA-dependent protein kinase catalytic subunit	PRKDC	sp|P78527|PRKDC_HUMAN DNA-dependent protein kinase catalytic subunit OS=Homo sapiens GN=PRKDC PE=1 SV=3	1	9	9	9	2	2	8	4	1	0	1	8	2	2	2	8	4	1	0	1	8	2	2	2	8	4	1	0	1	8	2	2.7	2.7	2.7	469.08	4128	4128	0	18.199	By MS/MS	By matching	By MS/MS
P81605	P81605	2	2	2	Dermcidin;Survival-promoting peptide;DCD-1	DCD	sp|P81605|DCD_HUMAN Dermcidin OS=Homo sapiens GN=DCD PE=1 SV=2	1	2	2	2	2	2	2	2	2	2	2	2	2	2	2	2	2	2	2	2	2	2	2	2	2	2	2	2	2	2	2	20	20	20	11.284	110	110	0	7.6715	By MS/MS	By MS/MS	By MS/MS
Q5JSK7;Q5JSK8;Q5JSL0;Q5JSK6;Q5JSK9;P82970	Q5JSK7;Q5JSK8;Q5JSL0;Q5JSK6;Q5JSK9;P82970	1;1;1;1;1;1	1;1;1;1;1;1	1;1;1;1;1;1	High mobility group nucleosome-binding domain-containing protein 5	HMGN5	tr|Q5JSK7|Q5JSK7_HUMAN High mobility group nucleosome-binding domain-containing protein 5 (Fragment) OS=Homo sapiens GN=HMGN5 PE=1 SV=1;tr|Q5JSK8|Q5JSK8_HUMAN High mobility group nucleosome-binding domain-containing protein 5 (Fragment) OS=Homo sapiens GN=	6	1	1	1	1	0	1	1	1	1	1	1	0	1	0	1	1	1	1	1	1	0	1	0	1	1	1	1	1	1	0	15.7	15.7	15.7	9.9522	89	89;102;148;161;201;282	0	3.53	By matching		By MS/MS
P84103;A0A087X2D0	P84103;A0A087X2D0	7;5	6;4	6;4	Serine/arginine-rich splicing factor 3	SRSF3	sp|P84103|SRSF3_HUMAN Serine/arginine-rich splicing factor 3 OS=Homo sapiens GN=SRSF3 PE=1 SV=1;tr|A0A087X2D0|A0A087X2D0_HUMAN Serine/arginine-rich-splicing factor 3 OS=Homo sapiens GN=SRSF3 PE=1 SV=1	2	7	6	6	7	7	7	7	7	7	7	7	7	6	6	6	6	6	6	6	6	6	6	6	6	6	6	6	6	6	6	40.2	31.7	31.7	19.329	164	164;95	0	21.715	By MS/MS	By MS/MS	By MS/MS
P98164;E9PC35	P98164;E9PC35	2;1	2;1	2;1	Low-density lipoprotein receptor-related protein 2	LRP2	sp|P98164|LRP2_HUMAN Low-density lipoprotein receptor-related protein 2 OS=Homo sapiens GN=LRP2 PE=1 SV=3;tr|E9PC35|E9PC35_HUMAN Low-density lipoprotein receptor-related protein 2 OS=Homo sapiens GN=LRP2 PE=1 SV=1	2	2	2	2	2	2	2	2	2	2	2	2	2	2	2	2	2	2	2	2	2	2	2	2	2	2	2	2	2	2	2	0.4	0.4	0.4	521.95	4655	4655;1225	0	3.6715	By MS/MS	By MS/MS	By MS/MS
Q00325;F8VVM2	Q00325;F8VVM2	4;3	4;3	4;3	Phosphate carrier protein, mitochondrial	SLC25A3	sp|Q00325|MPCP_HUMAN Phosphate carrier protein, mitochondrial OS=Homo sapiens GN=SLC25A3 PE=1 SV=2;tr|F8VVM2|F8VVM2_HUMAN Phosphate carrier protein, mitochondrial OS=Homo sapiens GN=SLC25A3 PE=1 SV=1	2	4	4	4	4	2	4	3	4	3	3	3	2	4	2	4	3	4	3	3	3	2	4	2	4	3	4	3	3	3	2	11.9	11.9	11.9	40.094	362	362;324	0	10.342	By MS/MS	By MS/MS	By MS/MS
Q00688	Q00688	5	5	5	Peptidyl-prolyl cis-trans isomerase FKBP3	FKBP3	sp|Q00688|FKBP3_HUMAN Peptidyl-prolyl cis-trans isomerase FKBP3 OS=Homo sapiens GN=FKBP3 PE=1 SV=1	1	5	5	5	4	3	4	5	4	5	5	4	5	4	3	4	5	4	5	5	4	5	4	3	4	5	4	5	5	4	5	27.7	27.7	27.7	25.177	224	224	0	33.285	By MS/MS	By MS/MS	By MS/MS
Q00839;Q5RI18	Q00839	8;1	8;1	8;1	Heterogeneous nuclear ribonucleoprotein U	HNRNPU	sp|Q00839|HNRPU_HUMAN Heterogeneous nuclear ribonucleoprotein U OS=Homo sapiens GN=HNRNPU PE=1 SV=6	2	8	8	8	6	4	7	7	7	5	5	8	7	6	4	7	7	7	5	5	8	7	6	4	7	7	7	5	5	8	7	12.8	12.8	12.8	90.583	825	825;242	0	31.408	By MS/MS	By MS/MS	By MS/MS
Q01082;A0A087WUZ3;F8W6C1;A4QPE4;P11277	Q01082;A0A087WUZ3	25;23;5;1;1	25;23;5;1;1	24;22;4;0;0	Spectrin beta chain, non-erythrocytic 1	SPTBN1	sp|Q01082|SPTB2_HUMAN Spectrin beta chain, non-erythrocytic 1 OS=Homo sapiens GN=SPTBN1 PE=1 SV=2;tr|A0A087WUZ3|A0A087WUZ3_HUMAN Spectrin beta chain, non-erythrocytic 1 OS=Homo sapiens GN=SPTBN1 PE=1 SV=1	5	25	25	24	11	13	16	18	19	20	17	16	14	11	13	16	18	19	20	17	16	14	11	13	16	17	19	20	17	16	14	13.2	13.2	12.8	274.61	2364	2364;2366;690;934;2137	0	67.831	By MS/MS	By MS/MS	By MS/MS
Q01469;I6L8B7;A8MUU1	Q01469;I6L8B7	7;4;1	7;4;1	7;4;1	Fatty acid-binding protein, epidermal	FABP5	sp|Q01469|FABP5_HUMAN Fatty acid-binding protein, epidermal OS=Homo sapiens GN=FABP5 PE=1 SV=3;tr|I6L8B7|I6L8B7_HUMAN Fatty acid-binding protein, epidermal OS=Homo sapiens GN=FABP5 PE=1 SV=1	3	7	7	7	7	6	5	6	6	6	6	6	6	7	6	5	6	6	6	6	6	6	7	6	5	6	6	6	6	6	6	59.3	59.3	59.3	15.164	135	135;101;101	0	45.55	By MS/MS	By MS/MS	By MS/MS
Q01518;Q5T0R7;Q5T0R6;Q5T0R5;Q5T0R4;Q5T0R3;Q5T0R2;Q5T0R1;Q5T0R9	Q01518;Q5T0R7;Q5T0R6;Q5T0R5;Q5T0R4;Q5T0R3;Q5T0R2;Q5T0R1;Q5T0R9	5;3;3;3;3;3;3;3;3	5;3;3;3;3;3;3;3;3	5;3;3;3;3;3;3;3;3	Adenylyl cyclase-associated protein 1;Adenylyl cyclase-associated protein	CAP1	sp|Q01518|CAP1_HUMAN Adenylyl cyclase-associated protein 1 OS=Homo sapiens GN=CAP1 PE=1 SV=5;tr|Q5T0R7|Q5T0R7_HUMAN Adenylyl cyclase-associated protein (Fragment) OS=Homo sapiens GN=CAP1 PE=1 SV=1;tr|Q5T0R6|Q5T0R6_HUMAN Adenylyl cyclase-associated protein	9	5	5	5	1	0	5	2	1	1	3	3	3	1	0	5	2	1	1	3	3	3	1	0	5	2	1	1	3	3	3	13.1	13.1	13.1	51.901	475	475;174;176;180;202;203;208;215;263	0	14.199	By MS/MS		By MS/MS
Q01546;CON__Q01546	Q01546;CON__Q01546	10;9	1;1	1;1	Keratin, type II cytoskeletal 2 oral	KRT76	sp|Q01546|K22O_HUMAN Keratin, type II cytoskeletal 2 oral OS=Homo sapiens GN=KRT76 PE=1 SV=2;	2	10	1	1	9	9	9	9	9	9	9	9	9	0	0	0	0	0	0	0	0	1	0	0	0	0	0	0	0	0	1	9.7	1.6	1.6	65.84	638	638;638	0.003581	2.774	By matching	By matching	By matching
Q01581;D6RIW1	Q01581;D6RIW1	2;1	2;1	2;1	Hydroxymethylglutaryl-CoA synthase, cytoplasmic	HMGCS1	sp|Q01581|HMCS1_HUMAN Hydroxymethylglutaryl-CoA synthase, cytoplasmic OS=Homo sapiens GN=HMGCS1 PE=1 SV=2;tr|D6RIW1|D6RIW1_HUMAN Hydroxymethylglutaryl-CoA synthase, cytoplasmic (Fragment) OS=Homo sapiens GN=HMGCS1 PE=1 SV=7	2	2	2	2	1	0	0	1	0	1	1	0	0	1	0	0	1	0	1	1	0	0	1	0	0	1	0	1	1	0	0	3.5	3.5	3.5	57.293	520	520;96	0	3.1824	By matching
Q02413	Q02413	17	17	17	Desmoglein-1	DSG1	sp|Q02413|DSG1_HUMAN Desmoglein-1 OS=Homo sapiens GN=DSG1 PE=1 SV=2	1	17	17	17	14	15	16	13	12	16	16	17	14	14	15	16	13	12	16	16	17	14	14	15	16	13	12	16	16	17	14	20.9	20.9	20.9	113.75	1049	1049	0	75.087	By MS/MS	By MS/MS	By MS/MS
Q02790;F5H1U3;H0YFG2;F5H120	Q02790	16;4;2;1	16;4;2;1	16;4;2;1	Peptidyl-prolyl cis-trans isomerase FKBP4;Peptidyl-prolyl cis-trans isomerase FKBP4, N-terminally processed	FKBP4	sp|Q02790|FKBP4_HUMAN Peptidyl-prolyl cis-trans isomerase FKBP4 OS=Homo sapiens GN=FKBP4 PE=1 SV=3	4	16	16	16	11	10	12	12	11	11	12	12	11	11	10	12	12	11	11	12	12	11	11	10	12	12	11	11	12	12	11	45.1	45.1	45.1	51.804	459	459;86;84;51	0	53.4	By MS/MS	By MS/MS	By MS/MS
Q02878;F8VZ45;U3KQR5;F8VR69;F8VZA3;F8VWR1;F8VU16	Q02878	14;3;3;2;1;1;1	14;3;3;2;1;1;1	14;3;3;2;1;1;1	60S ribosomal protein L6	RPL6	sp|Q02878|RL6_HUMAN 60S ribosomal protein L6 OS=Homo sapiens GN=RPL6 PE=1 SV=3	7	14	14	14	14	14	14	14	14	14	14	14	14	14	14	14	14	14	14	14	14	14	14	14	14	14	14	14	14	14	14	44.8	44.8	44.8	32.728	288	288;159;160;64;105;118;120	0	130.72	By MS/MS	By MS/MS	By MS/MS
Q03111	Q03111	6	6	6	Protein ENL	MLLT1	sp|Q03111|ENL_HUMAN Protein ENL OS=Homo sapiens GN=MLLT1 PE=1 SV=2	1	6	6	6	2	2	6	5	6	3	0	4	3	2	2	6	5	6	3	0	4	3	2	2	6	5	6	3	0	4	3	13.1	13.1	13.1	62.055	559	559	0	17.952	By matching	By matching	By MS/MS
Q04760	Q04760	5	5	5	Lactoylglutathione lyase	GLO1	sp|Q04760|LGUL_HUMAN Lactoylglutathione lyase OS=Homo sapiens GN=GLO1 PE=1 SV=4	1	5	5	5	5	4	4	3	4	4	4	4	4	5	4	4	3	4	4	4	4	4	5	4	4	3	4	4	4	4	4	22.3	22.3	22.3	20.777	184	184	0	35.959	By MS/MS	By MS/MS	By MS/MS
Q04917;F8WEB6;A2IDB1;A2IDB2	Q04917	5;2;2;2	2;1;1;1	2;1;1;1	14-3-3 protein eta	YWHAH	sp|Q04917|1433F_HUMAN 14-3-3 protein eta OS=Homo sapiens GN=YWHAH PE=1 SV=4	4	5	2	2	4	5	5	4	5	5	5	4	5	1	2	2	2	2	2	2	1	2	1	2	2	2	2	2	2	1	2	19.9	9.8	9.8	28.218	246	246;39;72;162	0	3.4222	By matching	By MS/MS	By MS/MS
Q05519;Q5T760;Q5T757;B4DWT1;S4R3C4	Q05519;Q5T760;Q5T757	11;9;7;3;1	11;9;7;3;1	11;9;7;3;1	Serine/arginine-rich splicing factor 11	SRSF11	sp|Q05519|SRS11_HUMAN Serine/arginine-rich splicing factor 11 OS=Homo sapiens GN=SRSF11 PE=1 SV=1;tr|Q5T760|Q5T760_HUMAN Serine/arginine-rich-splicing factor 11 (Fragment) OS=Homo sapiens GN=SRSF11 PE=1 SV=1;tr|Q5T757|Q5T757_HUMAN Serine/arginine-rich-spli	5	11	11	11	11	11	11	11	10	11	11	11	11	11	11	11	11	10	11	11	11	11	11	11	11	11	10	11	11	11	11	27.3	27.3	27.3	53.542	484	484;389;424;128;80	0	130.46	By MS/MS	By MS/MS	By MS/MS
Q05639	Q05639	11	3	3	Elongation factor 1-alpha 2	EEF1A2	sp|Q05639|EF1A2_HUMAN Elongation factor 1-alpha 2 OS=Homo sapiens GN=EEF1A2 PE=1 SV=1	1	11	3	3	10	11	11	10	8	8	11	11	8	3	3	3	3	1	1	3	3	1	3	3	3	3	1	1	3	3	1	34.6	13.8	13.8	50.47	463	463	0	7.6846	By matching	By matching	By MS/MS
Q06830;A0A0A0MSI0;A0A0A0MRQ5;H7C3T4	Q06830;A0A0A0MSI0;A0A0A0MRQ5	11;10;6;2	11;10;6;2	8;7;3;0	Peroxiredoxin-1	PRDX1	sp|Q06830|PRDX1_HUMAN Peroxiredoxin-1 OS=Homo sapiens GN=PRDX1 PE=1 SV=1;tr|A0A0A0MSI0|A0A0A0MSI0_HUMAN Peroxiredoxin-1 (Fragment) OS=Homo sapiens GN=PRDX1 PE=1 SV=1;tr|A0A0A0MRQ5|A0A0A0MRQ5_HUMAN Peroxiredoxin-1 OS=Homo sapiens GN=PRDX1 PE=1 SV=1	4	11	11	8	10	9	10	9	9	11	10	9	10	10	9	10	9	9	11	10	9	10	7	7	7	7	6	8	7	6	7	68.3	68.3	55.3	22.11	199	199;171;97;161	0	59.33	By MS/MS	By MS/MS	By MS/MS
Q07021;I3L3Q7;I3L3B0	Q07021;I3L3Q7;I3L3B0	2;1;1	2;1;1	2;1;1	Complement component 1 Q subcomponent-binding protein, mitochondrial	C1QBP	sp|Q07021|C1QBP_HUMAN Complement component 1 Q subcomponent-binding protein, mitochondrial OS=Homo sapiens GN=C1QBP PE=1 SV=1;tr|I3L3Q7|I3L3Q7_HUMAN Complement component 1 Q subcomponent-binding protein, mitochondrial (Fragment) OS=Homo sapiens GN=C1QBP PE	3	2	2	2	1	2	2	1	2	2	2	2	2	1	2	2	1	2	2	2	2	2	1	2	2	1	2	2	2	2	2	8.5	8.5	8.5	31.362	282	282;177;178	0	7.2708	By MS/MS	By MS/MS	By MS/MS
Q07666;O75525;Q5VWX1	Q07666	3;1;1	3;1;1	3;1;1	KH domain-containing, RNA-binding, signal transduction-associated protein 1	KHDRBS1	sp|Q07666|KHDR1_HUMAN KH domain-containing, RNA-binding, signal transduction-associated protein 1 OS=Homo sapiens GN=KHDRBS1 PE=1 SV=1	3	3	3	3	3	1	3	3	2	3	3	3	3	3	1	3	3	2	3	3	3	3	3	1	3	3	2	3	3	3	3	8.4	8.4	8.4	48.227	443	443;346;349	0	11.59	By MS/MS	By matching	By MS/MS
Q07812;K4JQN1;I6LPK7	Q07812;K4JQN1	4;2;1	4;2;1	4;2;1	Apoptosis regulator BAX	BAX	sp|Q07812|BAX_HUMAN Apoptosis regulator BAX OS=Homo sapiens GN=BAX PE=1 SV=1;tr|K4JQN1|K4JQN1_HUMAN Apoptosis regulator BAX OS=Homo sapiens GN=BAX PE=1 SV=1	3	4	4	4	4	3	4	4	4	3	4	4	4	4	3	4	4	4	3	4	4	4	4	3	4	4	4	3	4	4	4	29.7	29.7	29.7	21.184	192	192;175;140	0	16.419	By MS/MS	By MS/MS	By MS/MS
Q08170;A0A0D9SEM4;A0A0D9SGD2	Q08170;A0A0D9SEM4	14;12;1	9;7;0	9;7;0	Serine/arginine-rich splicing factor 4	SRSF4	sp|Q08170|SRSF4_HUMAN Serine/arginine-rich splicing factor 4 OS=Homo sapiens GN=SRSF4 PE=1 SV=2;tr|A0A0D9SEM4|A0A0D9SEM4_HUMAN Serine/arginine-rich-splicing factor 4 (Fragment) OS=Homo sapiens GN=SRSF4 PE=1 SV=1	3	14	9	9	14	14	14	14	13	14	14	14	13	9	9	9	9	8	9	9	9	8	9	9	9	9	8	9	9	9	8	25.5	16	16	56.678	494	494;378;45	0	72.636	By MS/MS	By MS/MS	By MS/MS
Q08188	Q08188	6	6	6	Protein-glutamine gamma-glutamyltransferase E;Protein-glutamine gamma-glutamyltransferase E 50 kDa catalytic chain;Protein-glutamine gamma-glutamyltransferase E 27 kDa non-catalytic chain	TGM3	sp|Q08188|TGM3_HUMAN Protein-glutamine gamma-glutamyltransferase E OS=Homo sapiens GN=TGM3 PE=1 SV=4	1	6	6	6	4	4	4	1	1	3	4	6	3	4	4	4	1	1	3	4	6	3	4	4	4	1	1	3	4	6	3	8.7	8.7	8.7	76.631	693	693	0	16.721	By MS/MS	By MS/MS	By MS/MS
Q08211	Q08211	8	8	8	ATP-dependent RNA helicase A	DHX9	sp|Q08211|DHX9_HUMAN ATP-dependent RNA helicase A OS=Homo sapiens GN=DHX9 PE=1 SV=4	1	8	8	8	3	2	6	3	3	1	2	7	2	3	2	6	3	3	1	2	7	2	3	2	6	3	3	1	2	7	2	7	7	7	140.96	1270	1270	0	17.146	By MS/MS	By MS/MS	By MS/MS
Q08378	Q08378	2	2	2	Golgin subfamily A member 3	GOLGA3	sp|Q08378|GOGA3_HUMAN Golgin subfamily A member 3 OS=Homo sapiens GN=GOLGA3 PE=1 SV=2	1	2	2	2	2	2	2	2	2	2	2	2	2	2	2	2	2	2	2	2	2	2	2	2	2	2	2	2	2	2	2	1.4	1.4	1.4	167.35	1498	1498	0	3.6535	By MS/MS	By MS/MS	By MS/MS
Q08554	Q08554	8	8	8	Desmocollin-1	DSC1	sp|Q08554|DSC1_HUMAN Desmocollin-1 OS=Homo sapiens GN=DSC1 PE=1 SV=2	1	8	8	8	5	6	6	6	4	5	8	7	4	5	6	6	6	4	5	8	7	4	5	6	6	6	4	5	8	7	4	10.1	10.1	10.1	99.986	894	894	0	34.535	By MS/MS	By MS/MS	By MS/MS
Q08752	Q08752	4	4	4	Peptidyl-prolyl cis-trans isomerase D	PPID	sp|Q08752|PPID_HUMAN Peptidyl-prolyl cis-trans isomerase D OS=Homo sapiens GN=PPID PE=1 SV=3	1	4	4	4	2	2	2	2	2	1	1	3	1	2	2	2	2	2	1	1	3	1	2	2	2	2	2	1	1	3	1	10.3	10.3	10.3	40.763	370	370	0	9.4216	By MS/MS	By MS/MS	By MS/MS
Q08945;E9PMD4;A0A0U1RRK2;E9PPZ7	Q08945	25;9;5;2	25;9;5;2	25;9;5;2	FACT complex subunit SSRP1	SSRP1	sp|Q08945|SSRP1_HUMAN FACT complex subunit SSRP1 OS=Homo sapiens GN=SSRP1 PE=1 SV=1	4	25	25	25	22	21	22	23	24	24	23	24	24	22	21	22	23	24	24	23	24	24	22	21	22	23	24	24	23	24	24	44.3	44.3	44.3	81.074	709	709;173;225;89	0	171.63	By MS/MS	By MS/MS	By MS/MS
Q08J23;A0A140T9Y7	Q08J23	19;5	19;5	19;5	tRNA (cytosine(34)-C(5))-methyltransferase	NSUN2	sp|Q08J23|NSUN2_HUMAN tRNA (cytosine(34)-C(5))-methyltransferase OS=Homo sapiens GN=NSUN2 PE=1 SV=2	2	19	19	19	11	11	13	15	13	14	13	14	9	11	11	13	15	13	14	13	14	9	11	11	13	15	13	14	13	14	9	33.6	33.6	33.6	86.47	767	767;202	0	78.969	By MS/MS	By MS/MS	By MS/MS
Q09028;Q5JP02;H0YCT5;H0YF10;H0YDK2;E9PNS2;C9JPP3;E9PIC4;E9PNS6;H0YEU5	Q09028	5;2;2;2;2;1;1;1;1;1	3;0;0;0;0;1;1;1;1;0	3;0;0;0;0;1;1;1;1;0	Histone-binding protein RBBP4	RBBP4	sp|Q09028|RBBP4_HUMAN Histone-binding protein RBBP4 OS=Homo sapiens GN=RBBP4 PE=1 SV=3	10	5	3	3	3	3	4	4	4	3	4	5	4	1	1	2	2	2	1	2	3	2	1	1	2	2	2	1	2	3	2	13.4	9.9	9.9	47.655	425	425;175;180;207;262;62;87;87;104;167	0	10.639	By MS/MS	By MS/MS	By MS/MS
Q12872;H0YFR9	Q12872;H0YFR9	2;1	2;1	2;1	Splicing factor, suppressor of white-apricot homolog	SFSWAP	sp|Q12872|SFSWA_HUMAN Splicing factor, suppressor of white-apricot homolog OS=Homo sapiens GN=SFSWAP PE=1 SV=3;tr|H0YFR9|H0YFR9_HUMAN Splicing factor, suppressor of white-apricot homolog (Fragment) OS=Homo sapiens GN=SFSWAP PE=1 SV=1	2	2	2	2	1	0	1	0	0	1	0	1	1	1	0	1	0	0	1	0	1	1	1	0	1	0	0	1	0	1	1	2.2	2.2	2.2	104.82	951	951;320	0	3.7415	By MS/MS		By MS/MS
Q12904;D6R937	Q12904;D6R937	2;1	2;1	2;1	Aminoacyl tRNA synthase complex-interacting multifunctional protein 1;Endothelial monocyte-activating polypeptide 2	AIMP1	sp|Q12904|AIMP1_HUMAN Aminoacyl tRNA synthase complex-interacting multifunctional protein 1 OS=Homo sapiens GN=AIMP1 PE=1 SV=2;tr|D6R937|D6R937_HUMAN Aminoacyl tRNA synthase complex-interacting multifunctional protein 1 (Fragment) OS=Homo sapiens GN=AIMP1	2	2	2	2	0	0	2	0	1	0	0	1	1	0	0	2	0	1	0	0	1	1	0	0	2	0	1	0	0	1	1	10.3	10.3	10.3	34.352	312	312;150	0	6.0625			By MS/MS
Q12906;K7ERM6;K7ENK6;K7EM82;K7EJ09;K7ER69;K7EKJ9	Q12906;K7ERM6;K7ENK6;K7EM82;K7EJ09;K7ER69;K7EKJ9	2;1;1;1;1;1;1	2;1;1;1;1;1;1	2;1;1;1;1;1;1	Interleukin enhancer-binding factor 3	ILF3	sp|Q12906|ILF3_HUMAN Interleukin enhancer-binding factor 3 OS=Homo sapiens GN=ILF3 PE=1 SV=3;tr|K7ERM6|K7ERM6_HUMAN Interleukin enhancer-binding factor 3 (Fragment) OS=Homo sapiens GN=ILF3 PE=1 SV=7;tr|K7ENK6|K7ENK6_HUMAN Interleukin enhancer-binding facto	7	2	2	2	2	2	2	1	2	2	2	2	0	2	2	2	1	2	2	2	2	0	2	2	2	1	2	2	2	2	0	3.7	3.7	3.7	95.337	894	894;78;79;99;122;161;254	0	6.4294	By MS/MS	By MS/MS	By MS/MS
Q12931;I3L0K7	Q12931;I3L0K7	2;1	2;1	2;1	Heat shock protein 75 kDa, mitochondrial	TRAP1	sp|Q12931|TRAP1_HUMAN Heat shock protein 75 kDa, mitochondrial OS=Homo sapiens GN=TRAP1 PE=1 SV=3;tr|I3L0K7|I3L0K7_HUMAN Heat shock protein 75 kDa, mitochondrial OS=Homo sapiens GN=TRAP1 PE=1 SV=1	2	2	2	2	0	1	2	1	1	2	2	2	1	0	1	2	1	1	2	2	2	1	0	1	2	1	1	2	2	2	1	3.1	3.1	3.1	80.109	704	704;495	0	4.4327		By matching	By MS/MS
Q12986	Q12986	5	5	5	Transcriptional repressor NF-X1	NFX1	sp|Q12986|NFX1_HUMAN Transcriptional repressor NF-X1 OS=Homo sapiens GN=NFX1 PE=1 SV=2	1	5	5	5	3	4	2	3	4	5	4	3	3	3	4	2	3	4	5	4	3	3	3	4	2	3	4	5	4	3	3	5.4	5.4	5.4	124.39	1120	1120	0	15.757	By MS/MS	By MS/MS	By MS/MS
Q13045;J3KS54;J3KS39;J3QQU5;J3QQQ2	Q13045	8;3;1;1;1	8;3;1;1;1	8;3;1;1;1	Protein flightless-1 homolog	FLII	sp|Q13045|FLII_HUMAN Protein flightless-1 homolog OS=Homo sapiens GN=FLII PE=1 SV=2	5	8	8	8	5	4	6	5	5	5	7	6	2	5	4	6	5	5	5	7	6	2	5	4	6	5	5	5	7	6	2	7	7	7	144.75	1269	1269;700;51;117;279	0	21.922	By MS/MS	By MS/MS	By MS/MS
Q13111;K7EPA1	Q13111	4;1	4;1	4;1	Chromatin assembly factor 1 subunit A	CHAF1A	sp|Q13111|CAF1A_HUMAN Chromatin assembly factor 1 subunit A OS=Homo sapiens GN=CHAF1A PE=1 SV=2	2	4	4	4	2	1	0	1	0	1	0	0	4	2	1	0	1	0	1	0	0	4	2	1	0	1	0	1	0	0	4	4.4	4.4	4.4	106.92	956	956;292	0	10.053	By matching	By matching
Q13123;D6REL4;Q9H4P6;E7EQZ7;D6RCQ4;D6RAY9;A0A0C4DGW5	Q13123;D6REL4;Q9H4P6;E7EQZ7	4;2;2;2;1;1;1	4;2;2;2;1;1;1	4;2;2;2;1;1;1	Protein Red	IK	sp|Q13123|RED_HUMAN Protein Red OS=Homo sapiens GN=IK PE=1 SV=3;tr|D6REL4|D6REL4_HUMAN Protein Red (Fragment) OS=Homo sapiens GN=IK PE=1 SV=6;tr|Q9H4P6|Q9H4P6_HUMAN Clone TCCCIA00142 mRNA sequence OS=Homo sapiens GN=IK PE=1 SV=1;tr|E7EQZ7|E7EQZ7_HUMAN Prot	7	4	4	4	2	1	3	4	2	3	1	3	3	2	1	3	4	2	3	1	3	3	2	1	3	4	2	3	1	3	3	7.5	7.5	7.5	65.601	557	557;212;240;267;107;140;162	0	8.066	By matching	By matching	By MS/MS
Q13131;Q96E92;A0A087WXX9;P54646	Q13131;Q96E92;A0A087WXX9;P54646	2;1;1;1	2;1;1;1	2;1;1;1	5-AMP-activated protein kinase catalytic subunit alpha-1;5-AMP-activated protein kinase catalytic subunit alpha-2	PRKAA1;PRKAA2	sp|Q13131|AAPK1_HUMAN 5-AMP-activated protein kinase catalytic subunit alpha-1 OS=Homo sapiens GN=PRKAA1 PE=1 SV=4;tr|Q96E92|Q96E92_HUMAN 5-AMP-activated protein kinase catalytic subunit alpha-1 OS=Homo sapiens GN=PRKAA1 PE=1 SV=1;tr|A0A087WXX9|A0A087WXX	4	2	2	2	1	0	0	1	1	1	2	0	0	1	0	0	1	1	1	2	0	0	1	0	0	1	1	1	2	0	0	4.8	4.8	4.8	64.009	559	559;207;552;552	0	4.3168	By MS/MS
Q13162;A6NG45	Q13162;A6NG45	4;2	2;2	2;2	Peroxiredoxin-4	PRDX4	sp|Q13162|PRDX4_HUMAN Peroxiredoxin-4 OS=Homo sapiens GN=PRDX4 PE=1 SV=1;tr|A6NG45|A6NG45_HUMAN Peroxiredoxin-4 OS=Homo sapiens GN=PRDX4 PE=1 SV=1	2	4	2	2	2	2	2	2	2	2	2	3	3	0	0	0	0	0	0	0	1	1	0	0	0	0	0	0	0	1	1	17.7	12.2	12.2	30.54	271	271;186	0	3.7092	By matching	By matching	By matching
Q13177	Q13177	2	2	2	Serine/threonine-protein kinase PAK 2;PAK-2p27;PAK-2p34	PAK2	sp|Q13177|PAK2_HUMAN Serine/threonine-protein kinase PAK 2 OS=Homo sapiens GN=PAK2 PE=1 SV=3	1	2	2	2	1	0	1	1	1	1	0	2	0	1	0	1	1	1	1	0	2	0	1	0	1	1	1	1	0	2	0	4	4	4	58.042	524	524	0.00181	2.9258	By matching		By matching
Q13243;B4DJK0;B4DUA4;G3V5K8	Q13243;B4DJK0;B4DUA4	9;5;5;4	8;4;4;4	8;4;4;4	Serine/arginine-rich splicing factor 5	SRSF5	sp|Q13243|SRSF5_HUMAN Serine/arginine-rich splicing factor 5 OS=Homo sapiens GN=SRSF5 PE=1 SV=1;tr|B4DJK0|B4DJK0_HUMAN Serine/arginine-rich-splicing factor 5 OS=Homo sapiens GN=SRSF5 PE=1 SV=1;tr|B4DUA4|B4DUA4_HUMAN Serine/arginine-rich-splicing factor 5 O	4	9	8	8	9	8	8	9	8	8	8	8	9	8	7	7	8	7	7	7	7	8	8	7	7	8	7	7	7	7	8	27.9	24.6	24.6	31.263	272	272;124;138;99	0	43.458	By MS/MS	By MS/MS	By MS/MS
Q13247	Q13247	15	15	10	Serine/arginine-rich splicing factor 6	SRSF6	sp|Q13247|SRSF6_HUMAN Serine/arginine-rich splicing factor 6 OS=Homo sapiens GN=SRSF6 PE=1 SV=2	1	15	15	10	15	15	15	14	15	14	14	15	15	15	15	15	14	15	14	14	15	15	10	10	10	9	10	9	9	10	10	37.8	37.8	24.1	39.586	344	344	0	91.678	By MS/MS	By MS/MS	By MS/MS
Q13263;M0R0K9	Q13263;M0R0K9	5;4	5;4	5;4	Transcription intermediary factor 1-beta	TRIM28	sp|Q13263|TIF1B_HUMAN Transcription intermediary factor 1-beta OS=Homo sapiens GN=TRIM28 PE=1 SV=5;tr|M0R0K9|M0R0K9_HUMAN Transcription intermediary factor 1-beta (Fragment) OS=Homo sapiens GN=TRIM28 PE=1 SV=1	2	5	5	5	1	1	4	3	2	3	1	5	1	1	1	4	3	2	3	1	5	1	1	1	4	3	2	3	1	5	1	9.7	9.7	9.7	88.549	835	835;460	0	16.792	By MS/MS	By MS/MS	By MS/MS
Q13283;E5RI46;E5RIF8;E5RH42;E5RJU8;E5RH00;E5RIZ6;D6R9X5;D6R9A4;D6RBM9;D6REX8;D6RBR0;D6RE13;D6RBW8;D6RGJ4;D6RAC7;D6RB17	Q13283	8;3;3;3;3;2;2;1;1;1;1;1;1;1;1;1;1	8;3;3;3;3;2;2;1;1;1;1;1;1;1;1;1;1	7;2;2;2;2;1;1;0;0;0;0;0;0;0;0;0;0	Ras GTPase-activating protein-binding protein 1	G3BP1	sp|Q13283|G3BP1_HUMAN Ras GTPase-activating protein-binding protein 1 OS=Homo sapiens GN=G3BP1 PE=1 SV=1	17	8	8	7	7	6	8	8	7	8	7	8	8	7	6	8	8	7	8	7	8	8	6	5	7	7	6	7	6	7	7	23.4	23.4	20.8	52.164	466	466;105;106;117;153;37;148;56;59;78;99;102;111;116;125;141;198	0	32.31	By MS/MS	By MS/MS	By MS/MS
Q13347;Q5TFK1	Q13347	7;2	7;2	7;2	Eukaryotic translation initiation factor 3 subunit I	EIF3I	sp|Q13347|EIF3I_HUMAN Eukaryotic translation initiation factor 3 subunit I OS=Homo sapiens GN=EIF3I PE=1 SV=1	2	7	7	7	6	4	5	6	6	5	6	6	4	6	4	5	6	6	5	6	6	4	6	4	5	6	6	5	6	6	4	26.8	26.8	26.8	36.501	325	325;125	0	33.523	By MS/MS	By MS/MS	By MS/MS
Q13427;E9PG73;C9JM79;C9JN15;C9JT64;C9J679	Q13427;E9PG73;C9JM79;C9JN15	14;12;10;9;2;2	14;12;10;9;2;2	14;12;10;9;2;2	Peptidyl-prolyl cis-trans isomerase G;Peptidyl-prolyl cis-trans isomerase	PPIG	sp|Q13427|PPIG_HUMAN Peptidyl-prolyl cis-trans isomerase G OS=Homo sapiens GN=PPIG PE=1 SV=2;tr|E9PG73|E9PG73_HUMAN Peptidyl-prolyl cis-trans isomerase G OS=Homo sapiens GN=PPIG PE=1 SV=1;tr|C9JM79|C9JM79_HUMAN Peptidyl-prolyl cis-trans isomerase G (Fragme	6	14	14	14	14	14	14	14	12	13	12	13	13	14	14	14	14	12	13	12	13	13	14	14	14	14	12	13	12	13	13	21.2	21.2	21.2	88.616	754	754;739;487;246;59;104	0	76.106	By MS/MS	By MS/MS	By MS/MS
Q13428;J3KQ96	Q13428;J3KQ96	38;35	38;35	4;1	Treacle protein	TCOF1	sp|Q13428|TCOF_HUMAN Treacle protein OS=Homo sapiens GN=TCOF1 PE=1 SV=3;tr|J3KQ96|J3KQ96_HUMAN Treacle protein (Fragment) OS=Homo sapiens GN=TCOF1 PE=1 SV=1	2	38	38	4	34	34	32	33	36	34	34	34	33	34	34	32	33	36	34	34	34	33	3	3	3	3	3	3	3	4	3	26.7	26.7	2.4	152.1	1488	1488;1414	0	139.34	By MS/MS	By MS/MS	By MS/MS
[truncated: 272 more rows]
[truncated: 58 more columns]
