# Supplementary material for: FER-mediated phosphorylation and PIK3R2 recruitment on IRS4 promotes AKT activation and tumorigenesis in ovarian cancer cells
Source: eLife. 2022 May 12;11:e76183. doi: 10.7554/eLife.76183 (PMC9098222; doi:10.7554/eLife.76183)
Supplement: Supplementary file 12. — The IRS4-WT and IRS4-5YF interactome is shown in this file. [file elife-76183-supp12.xlsx]

## Sheet: proteinGroups
	Groups	Samples
	IRS4-WT	A1	A2	A3
	IRS4-5YF	C1	C2	C3
Protein IDs	Majority protein IDs	Peptide counts (all)	Peptide counts (razor+unique)	Peptide counts (unique)	Protein names	Gene names	Fasta headers	Number of proteins	Peptides	Razor + unique peptides	Unique peptides	Peptides A1	Peptides A2	Peptides A3	Peptides C1	Peptides C2	Peptides C3	Razor + unique peptides A1	Razor + unique peptides A2	Razor + unique peptides A3	Razor + unique peptides C1	Razor + unique peptides C2	Razor + unique peptides C3	Unique peptides A1	Unique peptides A2	Unique peptides A3	Unique peptides C1	Unique peptides C2	Unique peptides C3	Sequence coverage [%]	Unique + razor sequence coverage [%]	Unique sequence coverage [%]	Mol. weight [kDa]	Sequence length	Sequence lengths	Q-value	Score	Identification type A1	Identification type A2	Identification type A3	Identification type C1	Identification type C2	Identification type C3	Sequence coverage A1 [%]	Sequence coverage A2 [%]	Sequence coverage A3 [%]	Sequence coverage C1 [%]	Sequence coverage C2 [%]	Sequence coverage C3 [%]
Q9UQ35;I3L4D8;I3L182;I3L1I8;A0A087X1W1;I3L1C0;I3L0N7;I3L3Q8;I3L4U6	Q9UQ35	116;39;27;16;14;8;7;5;3	116;39;27;16;14;8;7;5;3	116;39;27;16;14;8;7;5;3	Serine/arginine repetitive matrix protein 2	SRRM2	sp|Q9UQ35|SRRM2_HUMAN Serine/arginine repetitive matrix protein 2 OS=Homo sapiens GN=SRRM2 PE=1 SV=2	9	116	116	116	110	108	105	111	109	101	110	108	105	111	109	101	110	108	105	111	109	101	43.6	43.6	43.6	299.61	2752	2752;1018;895;297;251;94;115;184;78	0	323.31	By MS/MS	By MS/MS	By MS/MS	By MS/MS	By MS/MS	By MS/MS	43	42.5	41.9	43.1	42.7	40.6
CON__P02769;H7C013	CON__P02769	57;1	57;1	53;0				2	57	57	53	51	50	55	53	55	53	51	50	55	53	55	53	47	46	51	49	51	49	83.4	83.4	82.2	69.293	607	607;197	0	323.31	By MS/MS	By MS/MS	By MS/MS	By MS/MS	By MS/MS	By MS/MS	74.6	76.9	83	79.1	83.4	77.4
O94776;H7C3F3;E9PCS8;E7EQY4;D6W5A2;E7EV10;Q9BTC8	O94776	56;2;2;2;2;2;2	56;2;2;2;2;2;2	53;0;1;1;1;1;1	Metastasis-associated protein MTA2	MTA2	sp|O94776|MTA2_HUMAN Metastasis-associated protein MTA2 OS=Homo sapiens GN=MTA2 PE=1 SV=1	7	56	56	53	53	56	53	53	51	50	53	56	53	53	51	50	50	53	50	50	48	47	63.5	63.5	59.7	75.022	668	668;55;392;514;537;590;594	0	323.31	By MS/MS	By MS/MS	By MS/MS	By MS/MS	By MS/MS	By MS/MS	61.8	63.5	61.1	63.2	62.7	61.1
P11498;E9PRE7;E9PS68	P11498	40;18;11	40;18;11	40;18;11	Pyruvate carboxylase, mitochondrial	PC	sp|P11498|PYC_HUMAN Pyruvate carboxylase, mitochondrial OS=Homo sapiens GN=PC PE=1 SV=2	3	40	40	40	35	34	33	40	39	38	35	34	33	40	39	38	35	34	33	40	39	38	40.3	40.3	40.3	129.63	1178	1178;489;298	0	323.31	By MS/MS	By MS/MS	By MS/MS	By MS/MS	By MS/MS	By MS/MS	36.3	34.6	34.4	40.3	40.1	40
P25440;H0Y6K2;A0A140T9E9;A0A0G2JK44;A0A140T9V2;A0A0G2JHL0;U3KQA6;A0A140T9F7;E9PIQ3;A0A0G2JHN8;H0Y799;A0A140T9X8;A0A140T9I1;E9PKQ9;H0YDJ7;U3KPW0;REV__A0A0G2JHN8;REV__A0A140T9I1;REV__P25440;REV__H0Y6K2;REV__A0A140T9E9;REV__A0A0G2JK44	P25440;H0Y6K2;A0A140T9E9;A0A0G2JK44;A0A140T9V2;A0A0G2JHL0;U3KQA6;A0A140T9F7	44;43;43;42;31;30;29;29;21;17;15;15;15;8;5;5;1;1;1;1;1;1	44;43;43;42;31;30;29;29;21;17;15;15;15;8;5;5;1;1;1;1;1;1	40;39;39;38;30;29;28;28;21;14;15;15;12;8;5;5;1;1;1;1;1;1	Bromodomain-containing protein 2	BRD2	sp|P25440|BRD2_HUMAN Bromodomain-containing protein 2 OS=Homo sapiens GN=BRD2 PE=1 SV=2;tr|H0Y6K2|H0Y6K2_HUMAN Bromodomain-containing protein 2 (Fragment) OS=Homo sapiens GN=BRD2 PE=1 SV=1;tr|A0A140T9E9|A0A140T9E9_HUMAN Bromodomain-containing protein 2 (Fr	22	44	44	40	43	40	41	43	44	41	43	40	41	43	44	41	39	36	38	39	40	37	45.9	45.9	44.2	88.06	801	801;807;807;836;648;613;552;619;401;328;296;296;363;147;137;159;328;363;801;807;807;836	0	323.31	By MS/MS	By MS/MS	By MS/MS	By MS/MS	By MS/MS	By MS/MS	45.9	44.6	45.9	44.9	45.9	44.9
O14654;H3BTC1	O14654	39;1	39;1	39;1	Insulin receptor substrate 4	IRS4	sp|O14654|IRS4_HUMAN Insulin receptor substrate 4 OS=Homo sapiens GN=IRS4 PE=1 SV=1	2	39	39	39	38	36	37	34	35	34	38	36	37	34	35	34	38	36	37	34	35	34	37.3	37.3	37.3	133.77	1257	1257;37	0	323.31	By MS/MS	By MS/MS	By MS/MS	By MS/MS	By MS/MS	By MS/MS	36.4	34.6	35.9	33.9	34.7	33.9
Q9Y2W1	Q9Y2W1	40	39	39	Thyroid hormone receptor-associated protein 3	THRAP3	sp|Q9Y2W1|TR150_HUMAN Thyroid hormone receptor-associated protein 3 OS=Homo sapiens GN=THRAP3 PE=1 SV=2	1	40	39	39	36	36	37	37	36	35	35	35	36	36	35	34	35	35	36	36	35	34	36.2	35.1	35.1	108.66	955	955	0	323.31	By MS/MS	By MS/MS	By MS/MS	By MS/MS	By MS/MS	By MS/MS	34.7	35.4	35.1	34.2	32.9	34.1
P36578;H3BM89;H3BTP7;H3BU31	P36578;H3BM89	36;25;16;16	36;25;16;16	35;25;15;15	60S ribosomal protein L4	RPL4	sp|P36578|RL4_HUMAN 60S ribosomal protein L4 OS=Homo sapiens GN=RPL4 PE=1 SV=5;tr|H3BM89|H3BM89_HUMAN 60S ribosomal protein L4 OS=Homo sapiens GN=RPL4 PE=1 SV=1	4	36	36	35	29	29	31	35	32	30	29	29	31	35	32	30	29	29	31	35	32	30	64.9	64.9	64.9	47.697	427	427;333;170;171	0	323.31	By MS/MS	By MS/MS	By MS/MS	By MS/MS	By MS/MS	By MS/MS	61.4	58.1	61.6	64.9	59.7	58.5
P08621;M0QYR1;M0QX04	P08621	33;13;2	33;13;2	33;13;2	U1 small nuclear ribonucleoprotein 70 kDa	SNRNP70	sp|P08621|RU17_HUMAN U1 small nuclear ribonucleoprotein 70 kDa OS=Homo sapiens GN=SNRNP70 PE=1 SV=2	3	33	33	33	31	30	31	31	30	28	31	30	31	31	30	28	31	30	31	31	30	28	41	41	41	51.556	437	437;94;33	0	323.31	By MS/MS	By MS/MS	By MS/MS	By MS/MS	By MS/MS	By MS/MS	41	39.8	41	39.8	39.8	39.4
Q14152	Q14152	31	31	31	Eukaryotic translation initiation factor 3 subunit A	EIF3A	sp|Q14152|EIF3A_HUMAN Eukaryotic translation initiation factor 3 subunit A OS=Homo sapiens GN=EIF3A PE=1 SV=1	1	31	31	31	25	26	28	27	29	27	25	26	28	27	29	27	25	26	28	27	29	27	20.4	20.4	20.4	166.57	1382	1382	0	219.07	By MS/MS	By MS/MS	By MS/MS	By MS/MS	By MS/MS	By MS/MS	16.5	17	18.1	17	18.7	17.1
A0A024R4E5;Q00341;H0Y394;H7C0A4;C9JIZ1;C9J5E5;C9JHS7;C9JHZ8;C9JES8;C9JZI8;C9JT62;C9JK79;C9JBS3;C9JEJ8;A0A0U1RVI6;C9JHN6;H7C2D1;C9JQ82;H7BZC3;C9JMQ6;C9JHS9;C9J739;H7C3D0	A0A024R4E5;Q00341;H0Y394	29;28;19;13;12;10;8;8;8;8;5;5;4;4;4;4;4;3;3;2;1;1;1	29;28;19;13;12;10;8;8;8;8;5;5;4;4;4;4;4;3;3;2;1;1;1	29;28;19;13;12;10;8;8;8;8;5;5;4;4;4;4;4;3;3;2;1;1;1	Vigilin	HDLBP	tr|A0A024R4E5|A0A024R4E5_HUMAN High density lipoprotein binding protein (Vigilin), isoform CRA_a OS=Homo sapiens GN=HDLBP PE=1 SV=1;sp|Q00341|VIGLN_HUMAN Vigilin OS=Homo sapiens GN=HDLBP PE=1 SV=2;tr|H0Y394|H0Y394_HUMAN Vigilin (Fragment) OS=Homo sapiens G	23	29	29	29	24	25	24	28	28	25	24	25	24	28	28	25	24	25	24	28	28	25	25.1	25.1	25.1	141.44	1268	1268;1268;973;333;224;221;126;141;147;164;96;128;69;79;81;82;308;54;267;47;17;19;126	0	202.38	By MS/MS	By MS/MS	By MS/MS	By MS/MS	By MS/MS	By MS/MS	21.2	21	21.2	24.4	24.4	22.3
P31689	P31689	29	29	29	DnaJ homolog subfamily A member 1	DNAJA1	sp|P31689|DNJA1_HUMAN DnaJ homolog subfamily A member 1 OS=Homo sapiens GN=DNAJA1 PE=1 SV=2	1	29	29	29	23	23	24	25	25	26	23	23	24	25	25	26	23	23	24	25	25	26	56.2	56.2	56.2	44.868	397	397	0	323.31	By MS/MS	By MS/MS	By MS/MS	By MS/MS	By MS/MS	By MS/MS	49.1	51.4	50.9	53.1	49.9	53.4
P04075;J3KPS3;H3BQN4;H3BUH7;H3BPS8;H3BR04;H3BMQ8;H3BR68;H3BU78	P04075;J3KPS3;H3BQN4;H3BUH7;H3BPS8	29;28;26;16;16;13;12;10;10	29;28;26;16;16;13;12;10;10	28;28;25;16;15;13;12;10;10	Fructose-bisphosphate aldolase A;Fructose-bisphosphate aldolase	ALDOA	sp|P04075|ALDOA_HUMAN Fructose-bisphosphate aldolase A OS=Homo sapiens GN=ALDOA PE=1 SV=2;tr|J3KPS3|J3KPS3_HUMAN Fructose-bisphosphate aldolase OS=Homo sapiens GN=ALDOA PE=1 SV=1;tr|H3BQN4|H3BQN4_HUMAN Fructose-bisphosphate aldolase OS=Homo sapiens GN=ALDO	9	29	29	28	22	17	26	28	28	28	22	17	26	28	28	28	21	16	25	27	27	27	75.8	75.8	68.1	39.42	364	364;368;361;155;278;162;140;130;204	0	323.31	By MS/MS	By MS/MS	By MS/MS	By MS/MS	By MS/MS	By MS/MS	56.9	56.9	63.2	70.9	75.8	75.8
O15042;E7ET15;E7EW00;H0Y8D9;C9J5L1;U3KPT1;C9JDJ7;H7C4V2	O15042;E7ET15;E7EW00;H0Y8D9	26;25;18;18;6;4;4;2	26;25;18;18;6;4;4;2	26;25;18;18;6;4;4;2	U2 snRNP-associated SURP motif-containing protein	U2SURP	sp|O15042|SR140_HUMAN U2 snRNP-associated SURP motif-containing protein OS=Homo sapiens GN=U2SURP PE=1 SV=2;tr|E7ET15|E7ET15_HUMAN U2 snRNP-associated SURP motif-containing protein OS=Homo sapiens GN=U2SURP PE=1 SV=1;tr|E7EW00|E7EW00_HUMAN U2 snRNP-associa	8	26	26	26	24	21	18	20	23	18	24	21	18	20	23	18	24	21	18	20	23	18	26.3	26.3	26.3	118.29	1029	1029;1028;425;439;161;125;131;290	0	266.1	By MS/MS	By MS/MS	By MS/MS	By MS/MS	By MS/MS	By MS/MS	22.3	20.6	18.6	22.1	23.8	19.4
P18583;H7C1M2;J3QSZ5;H7C2G8;H7C1S4;H7C257	P18583;H7C1M2;J3QSZ5	26;19;13;5;1;1	26;19;13;5;1;1	26;19;13;5;1;1	Protein SON	SON	sp|P18583|SON_HUMAN Protein SON OS=Homo sapiens GN=SON PE=1 SV=4;tr|H7C1M2|H7C1M2_HUMAN Protein SON (Fragment) OS=Homo sapiens GN=SON PE=1 SV=1;tr|J3QSZ5|J3QSZ5_HUMAN Protein SON OS=Homo sapiens GN=SON PE=1 SV=1	6	26	26	26	26	26	23	23	22	15	26	26	23	23	22	15	26	26	23	23	22	15	13.1	13.1	13.1	263.83	2426	2426;1454;454;343;92;97	0	191.56	By MS/MS	By MS/MS	By MS/MS	By MS/MS	By MS/MS	By MS/MS	13.1	13.1	12	12.3	12	8.8
P04406;E7EUT5;O14556	P04406;E7EUT5	25;21;1	25;21;1	25;21;1	Glyceraldehyde-3-phosphate dehydrogenase	GAPDH	sp|P04406|G3P_HUMAN Glyceraldehyde-3-phosphate dehydrogenase OS=Homo sapiens GN=GAPDH PE=1 SV=3;tr|E7EUT5|E7EUT5_HUMAN Glyceraldehyde-3-phosphate dehydrogenase OS=Homo sapiens GN=GAPDH PE=1 SV=1	3	25	25	25	15	17	19	20	20	23	15	17	19	20	20	23	15	17	19	20	20	23	58.8	58.8	58.8	36.053	335	335;260;408	0	323.31	By MS/MS	By MS/MS	By MS/MS	By MS/MS	By MS/MS	By MS/MS	47.2	54.3	57.6	57.6	57.9	57.6
P11142;E9PKE3;E9PNE6;E9PN89;E9PLF4;E9PQQ4;E9PQK7;E9PK54;A8K7Q2;E9PPY6;E9PI65;E9PN25;P54652;E9PS65;E9PM13	P11142;E9PKE3;E9PNE6;E9PN89;E9PLF4	29;27;19;17;15;14;14;14;12;11;10;9;9;7;5	29;27;19;17;15;14;14;14;12;11;10;9;9;7;5	24;22;15;15;13;13;13;13;9;10;8;8;5;5;3	Heat shock cognate 71 kDa protein	HSPA8	sp|P11142|HSP7C_HUMAN Heat shock cognate 71 kDa protein OS=Homo sapiens GN=HSPA8 PE=1 SV=1;tr|E9PKE3|E9PKE3_HUMAN Heat shock cognate 71 kDa protein OS=Homo sapiens GN=HSPA8 PE=1 SV=1;tr|E9PNE6|E9PNE6_HUMAN Heat shock cognate 71 kDa protein OS=Homo sapiens	15	29	29	24	26	25	27	29	29	27	26	25	27	29	29	27	22	21	22	24	24	22	47.1	47.1	40.9	70.897	646	646;627;500;312;187;171;178;184;410;137;168;132;639;223;151	0	323.31	By MS/MS	By MS/MS	By MS/MS	By MS/MS	By MS/MS	By MS/MS	43.3	43.3	44.7	47.1	47.1	45.5
P13639;M0R0I6	P13639	24;1	24;1	24;1	Elongation factor 2	EEF2	sp|P13639|EF2_HUMAN Elongation factor 2 OS=Homo sapiens GN=EEF2 PE=1 SV=4	2	24	24	24	19	15	21	21	24	22	19	15	21	21	24	22	19	15	21	21	24	22	24.9	24.9	24.9	95.337	858	858;85	0	284.23	By MS/MS	By MS/MS	By MS/MS	By MS/MS	By MS/MS	By MS/MS	21.3	17.1	22.7	23	24.9	22.3
Q92541;H0YKX1	Q92541	24;8	24;8	24;8	RNA polymerase-associated protein RTF1 homolog	RTF1	sp|Q92541|RTF1_HUMAN RNA polymerase-associated protein RTF1 homolog OS=Homo sapiens GN=RTF1 PE=1 SV=4	2	24	24	24	21	22	22	20	20	20	21	22	22	20	20	20	21	22	22	20	20	20	29.6	29.6	29.6	80.313	710	710;171	0	172.12	By MS/MS	By MS/MS	By MS/MS	By MS/MS	By MS/MS	By MS/MS	25.8	28.2	26.8	24.5	24.4	23.8
Q99615;K7EIH8;K7EPP7;K7ESP1;K7ER44;K7EJV7;K7EJL5;K7EN19;K7ELJ8;K7EJE9;K7EK03;K7EJ24	Q99615;K7EIH8;K7EPP7;K7ESP1;K7ER44	24;17;16;13;12;11;10;10;7;6;6;2	24;17;16;13;12;11;10;10;7;6;6;2	24;17;16;13;12;11;10;10;7;6;6;2	DnaJ homolog subfamily C member 7	DNAJC7	sp|Q99615|DNJC7_HUMAN DnaJ homolog subfamily C member 7 OS=Homo sapiens GN=DNAJC7 PE=1 SV=2;tr|K7EIH8|K7EIH8_HUMAN DnaJ homolog subfamily C member 7 (Fragment) OS=Homo sapiens GN=DNAJC7 PE=1 SV=7;tr|K7EPP7|K7EPP7_HUMAN DnaJ homolog subfamily C member 7 OS=	12	24	24	24	21	21	21	22	23	17	21	21	21	22	23	17	21	21	21	22	23	17	44.1	44.1	44.1	56.44	494	494;262;253;258;128;113;102;104;137;74;76;89	0	180.39	By MS/MS	By MS/MS	By MS/MS	By MS/MS	By MS/MS	By MS/MS	37.2	39.9	36.6	42.3	42.7	34.4
Q08945;A0A0U1RRK2;E9PMD4;E9PPZ7	Q08945	23;7;3;1	23;7;3;1	23;7;3;1	FACT complex subunit SSRP1	SSRP1	sp|Q08945|SSRP1_HUMAN FACT complex subunit SSRP1 OS=Homo sapiens GN=SSRP1 PE=1 SV=1	4	23	23	23	19	18	18	21	19	18	19	18	18	21	19	18	19	18	18	21	19	18	28.3	28.3	28.3	81.074	709	709;225;173;89	0	193.13	By MS/MS	By MS/MS	By MS/MS	By MS/MS	By MS/MS	By MS/MS	23	21.6	21.9	25.7	22.7	24.4
S4R3H4;E7EQT4;Q9UKV3;G3V3B0;G3V3T3;A0A087WYN3	S4R3H4;E7EQT4;Q9UKV3;G3V3B0	23;22;22;16;5;1	23;22;22;16;5;1	23;22;22;16;5;1	Apoptotic chromatin condensation inducer in the nucleus	ACIN1	tr|S4R3H4|S4R3H4_HUMAN Apoptotic chromatin condensation inducer in the nucleus OS=Homo sapiens GN=ACIN1 PE=1 SV=1;tr|E7EQT4|E7EQT4_HUMAN Apoptotic chromatin condensation inducer in the nucleus OS=Homo sapiens GN=ACIN1 PE=1 SV=2;sp|Q9UKV3|ACINU_HUMAN Apopto	6	23	23	23	22	21	22	21	21	17	22	21	22	21	21	17	22	21	22	21	21	17	24.9	24.9	24.9	145.44	1283	1283;1301;1341;582;194;82	0	176.45	By MS/MS	By MS/MS	By MS/MS	By MS/MS	By MS/MS	By MS/MS	24.9	24.9	23.7	23.5	23.9	19.6
P60174;U3KPZ0;U3KQF3;U3KPS5	P60174;U3KPZ0	22;11;9;4	22;11;9;4	22;11;9;4	Triosephosphate isomerase	TPI1	sp|P60174|TPIS_HUMAN Triosephosphate isomerase OS=Homo sapiens GN=TPI1 PE=1 SV=3;tr|U3KPZ0|U3KPZ0_HUMAN Triosephosphate isomerase (Fragment) OS=Homo sapiens GN=TPI1 PE=1 SV=1	4	22	22	22	20	20	22	22	22	21	20	20	22	22	22	21	20	20	22	22	22	21	76.6	76.6	76.6	30.791	286	286;113;98;39	0	323.31	By MS/MS	By MS/MS	By MS/MS	By MS/MS	By MS/MS	By MS/MS	64	74.1	76.6	76.6	76.6	76.6
Q14498;G3XAC6;A0A0U1RQH7;H0Y4X3;A0A0U1RQW2;Q5QP22;Q5QP23;Q86U06;A0A087X122;G3V546;G3V5Z6;H0YJJ3;G3XAP0	Q14498;G3XAC6;A0A0U1RQH7;H0Y4X3;A0A0U1RQW2	22;19;18;14;12;4;4;2;1;1;1;1;1	22;19;18;14;12;4;4;2;1;1;1;1;1	22;19;18;14;12;4;4;2;1;1;1;1;1	RNA-binding protein 39	RBM39	sp|Q14498|RBM39_HUMAN RNA-binding protein 39 OS=Homo sapiens GN=RBM39 PE=1 SV=2;tr|G3XAC6|G3XAC6_HUMAN RNA-binding protein 39 OS=Homo sapiens GN=RBM39 PE=1 SV=1;tr|A0A0U1RQH7|A0A0U1RQH7_HUMAN RNA-binding protein 39 (Fragment) OS=Homo sapiens GN=RBM39 PE=1	13	22	22	22	21	21	21	20	20	20	21	21	21	20	20	20	21	21	21	20	20	20	42.3	42.3	42.3	59.379	530	530;423;245;337;163;193;231;439;59;115;189;214;269	0	323.31	By MS/MS	By MS/MS	By MS/MS	By MS/MS	By MS/MS	By MS/MS	36.4	36.4	39.6	33.8	33.8	39.6
Q9Y383;A0A0A6YYC3;A0A0A6YYJ8;V9GZ75;F8WEU3;REV__E5RJG4;REV__E5RH23;REV__U3KQK2;REV__E5RGU5;REV__E5RGP2;REV__E5RHF8;REV__E5RG21;REV__E5RJH1;REV__Q6P2R3;REV__Q5TCU3;REV__P07951;REV__CON__Q3SX28;REV__Q5TCU8;REV__Q5T6A0;REV__E5RIV2;REV__Q8IYX8;REV__G3V140;REV__E5RFY4;REV__O15078;REV__J3KNF5	Q9Y383;A0A0A6YYC3;A0A0A6YYJ8	32;30;30;2;2;1;1;1;1;1;1;1;1;1;1;1;1;1;1;1;1;1;1;1;1	32;30;30;2;2;1;1;1;1;1;1;1;1;1;1;1;1;1;1;1;1;1;1;1;1	22;21;21;1;1;1;1;1;1;1;1;1;1;1;1;1;1;1;1;1;1;1;1;1;1	Putative RNA-binding protein Luc7-like 2	LUC7L2;C7orf55-LUC7L2	sp|Q9Y383|LC7L2_HUMAN Putative RNA-binding protein Luc7-like 2 OS=Homo sapiens GN=LUC7L2 PE=1 SV=2;tr|A0A0A6YYC3|A0A0A6YYC3_HUMAN Protein C7orf55-LUC7L2 OS=Homo sapiens GN=C7orf55-LUC7L2 PE=4 SV=1;tr|A0A0A6YYJ8|A0A0A6YYJ8_HUMAN Putative RNA-binding protein	25	32	32	22	32	32	32	31	32	29	32	32	32	31	32	29	22	22	22	21	22	19	50.8	50.8	42.1	46.513	392	392;389;458;54;83;79;102;111;129;166;206;230;235;251;284;284;284;322;360;407;460;463;477;2479;2481	0	323.31	By MS/MS	By MS/MS	By MS/MS	By MS/MS	By MS/MS	By MS/MS	50.8	50.8	50.8	50.8	50.8	50
CON__Q0IIK2;CON__Q29443;CON__Q2HJF0;E7EQB2;E7ER44;P02788;H7C5E8;P02787	CON__Q0IIK2;CON__Q29443	21;20;2;2;2;2;1;1	21;20;2;2;2;2;1;1	21;20;2;2;2;2;1;1			;	8	21	21	21	8	8	16	20	20	16	8	8	16	20	20	16	8	8	16	20	20	16	35.7	35.7	35.7	77.738	704	704;685;622;696;708;710;143;698	0	138.52	By MS/MS	By matching	By MS/MS	By MS/MS	By MS/MS	By MS/MS	12.9	14.1	26.1	33.2	33.7	28.1
P07814;V9GYZ6	P07814;V9GYZ6	21;15	21;15	21;15	Bifunctional glutamate/proline--tRNA ligase;Glutamate--tRNA ligase;Proline--tRNA ligase	EPRS	sp|P07814|SYEP_HUMAN Bifunctional glutamate/proline--tRNA ligase OS=Homo sapiens GN=EPRS PE=1 SV=5;tr|V9GYZ6|V9GYZ6_HUMAN Bifunctional glutamate/proline--tRNA ligase (Fragment) OS=Homo sapiens GN=EPRS PE=1 SV=1	2	21	21	21	7	3	10	20	19	17	7	3	10	20	19	17	7	3	10	20	19	17	18.3	18.3	18.3	170.59	1512	1512;968	0	144	By matching	By matching	By MS/MS	By MS/MS	By MS/MS	By MS/MS	6.6	2.5	8.7	17.7	16.7	13.9
P39023;G5E9G0;B5MCW2;H7C422;H7C3M2;F8WCR1;Q92901	P39023;G5E9G0;B5MCW2;H7C422	21;17;12;12;9;5;3	21;17;12;12;9;5;3	21;17;12;12;9;5;3	60S ribosomal protein L3	RPL3	sp|P39023|RL3_HUMAN 60S ribosomal protein L3 OS=Homo sapiens GN=RPL3 PE=1 SV=2;tr|G5E9G0|G5E9G0_HUMAN 60S ribosomal protein L3 OS=Homo sapiens GN=RPL3 PE=1 SV=1;tr|B5MCW2|B5MCW2_HUMAN 60S ribosomal protein L3 (Fragment) OS=Homo sapiens GN=RPL3 PE=1 SV=1;tr	7	21	21	21	18	17	19	21	21	19	18	17	19	21	21	19	18	17	19	21	21	19	47.4	47.4	47.4	46.108	403	403;351;272;305;261;180;407	0	153.71	By MS/MS	By MS/MS	By MS/MS	By MS/MS	By MS/MS	By MS/MS	44.9	43.4	45.4	47.4	47.4	45.7
P26373;J3QSB4;H3BTH3;J3KS98;H3BUK8	P26373;J3QSB4	20;12;6;5;3	20;12;6;5;3	20;12;6;5;3	60S ribosomal protein L13	RPL13	sp|P26373|RL13_HUMAN 60S ribosomal protein L13 OS=Homo sapiens GN=RPL13 PE=1 SV=4;tr|J3QSB4|J3QSB4_HUMAN 60S ribosomal protein L13 (Fragment) OS=Homo sapiens GN=RPL13 PE=1 SV=1	5	20	20	20	16	17	17	19	20	18	16	17	17	19	20	18	16	17	17	19	20	18	61.6	61.6	61.6	24.261	211	211;126;63;78;54	0	304.86	By MS/MS	By MS/MS	By MS/MS	By MS/MS	By MS/MS	By MS/MS	57.3	61.6	61.6	61.6	61.6	61.6
P62241;Q5JR95	P62241;Q5JR95	20;16	20;16	20;16	40S ribosomal protein S8	RPS8	sp|P62241|RS8_HUMAN 40S ribosomal protein S8 OS=Homo sapiens GN=RPS8 PE=1 SV=2;tr|Q5JR95|Q5JR95_HUMAN 40S ribosomal protein S8 OS=Homo sapiens GN=RPS8 PE=1 SV=1	2	20	20	20	13	16	15	16	20	16	13	16	15	16	20	16	13	16	15	16	20	16	62.5	62.5	62.5	24.205	208	208;188	0	323.31	By MS/MS	By MS/MS	By MS/MS	By MS/MS	By MS/MS	By MS/MS	59.1	62.5	61.1	62.5	62.5	61.5
Q02878;F8VZ45;U3KQR5;F8VR69;F8VZA3;F8VWR1;F8VU16	Q02878	20;6;6;3;3;3;3	20;6;6;3;3;3;3	20;6;6;3;3;3;3	60S ribosomal protein L6	RPL6	sp|Q02878|RL6_HUMAN 60S ribosomal protein L6 OS=Homo sapiens GN=RPL6 PE=1 SV=3	7	20	20	20	16	16	17	19	20	18	16	16	17	19	20	18	16	16	17	19	20	18	45.8	45.8	45.8	32.728	288	288;159;160;64;105;118;120	0	250.05	By MS/MS	By MS/MS	By MS/MS	By MS/MS	By MS/MS	By MS/MS	40.3	40.3	45.1	45.5	45.8	40.6
P68363;Q71U36;F5H5D3;Q9BQE3;P68366;Q13748;F8VVB9;Q6PEY2;C9J2C0;Q9NY65;F8VQQ4;F8VRZ4;F8VS66;F8VX09;F8VWV9;C9JDS9;F8VRK0;V9GZ17;A6NHL2;C9K0S6;C9JDL2;C9JEV8;C9JQ00;C9JJQ8;F8W0F6;F8VXZ7;Q9H853	P68363;Q71U36;F5H5D3;Q9BQE3;P68366;Q13748	19;17;16;16;14;12;9;9;8;8;7;6;6;5;5;4;3;3;3;2;2;2;2;2;2;1;1	19;17;16;16;14;12;9;9;8;8;7;6;6;5;5;4;3;3;3;2;2;2;2;2;2;1;1	19;17;16;16;14;12;9;9;8;8;7;6;6;5;5;4;3;3;3;2;2;2;2;2;2;1;1	Tubulin alpha-1B chain;Tubulin alpha-1A chain;Tubulin alpha-1C chain;Tubulin alpha-4A chain;Tubulin alpha-3C/D chain	TUBA1B;TUBA1A;TUBA1C;TUBA4A;TUBA3C	sp|P68363|TBA1B_HUMAN Tubulin alpha-1B chain OS=Homo sapiens GN=TUBA1B PE=1 SV=1;sp|Q71U36|TBA1A_HUMAN Tubulin alpha-1A chain OS=Homo sapiens GN=TUBA1A PE=1 SV=1;tr|F5H5D3|F5H5D3_HUMAN Tubulin alpha-1C chain OS=Homo sapiens GN=TUBA1C PE=1 SV=1;sp|Q9BQE3|TB	27	19	19	19	13	16	17	16	15	16	13	16	17	16	15	16	13	16	17	16	15	16	54.1	54.1	54.1	50.151	451	451;451;519;449;448;450;247;450;467;449;219;112;130;75;81;156;49;275;446;47;120;153;180;198;231;26;241	0	174.46	By MS/MS	By MS/MS	By MS/MS	By MS/MS	By MS/MS	By MS/MS	37.7	46.3	45.7	41.2	39	44.3
H3BV80;H3BMM9;H3BTC0;Q15287;H3BMS0;H3BPG5;H3BRK4;H3BTV0;H3BNI3;H3BP82;H3BTR6;H3BUG0;H3BTY0;H3BNU7;H3BUL0	H3BV80;H3BMM9;H3BTC0;Q15287;H3BMS0;H3BPG5	18;18;18;18;10;9;4;4;4;4;4;4;4;4;4	18;18;18;18;10;9;4;4;4;4;4;4;4;4;4	18;18;18;18;10;9;4;4;4;4;4;4;4;4;4	RNA-binding protein with serine-rich domain 1	RNPS1	tr|H3BV80|H3BV80_HUMAN RNA-binding protein with serine-rich domain 1 OS=Homo sapiens GN=RNPS1 PE=1 SV=2;tr|H3BMM9|H3BMM9_HUMAN RNA-binding protein with serine-rich domain 1 (Fragment) OS=Homo sapiens GN=RNPS1 PE=1 SV=1;tr|H3BTC0|H3BTC0_HUMAN RNA-binding pr	15	18	18	18	17	17	17	18	18	15	17	17	17	18	18	15	17	17	17	18	18	15	52.6	52.6	52.6	24.561	211	211;284;302;305;257;128;29;45;85;98;127;139;150;156;169	0	323.31	By MS/MS	By MS/MS	By MS/MS	By MS/MS	By MS/MS	By MS/MS	52.6	52.1	52.1	52.6	52.6	52.1
J3KPP4;O95232;D6RDI2;C9JL41;H7C5U7;E7EN55;H0YA81;D6RHH0;U3KQT3;H0YBV7;H0YAR4	J3KPP4;O95232;D6RDI2	18;18;10;6;3;3;3;2;2;1;1	18;18;10;6;3;3;3;2;2;1;1	18;18;10;6;3;3;3;2;2;1;1	Luc7-like protein 3	LUC7L3	tr|J3KPP4|J3KPP4_HUMAN Cisplatin resistance-associated overexpressed protein, isoform CRA_b OS=Homo sapiens GN=LUC7L3 PE=1 SV=1;sp|O95232|LC7L3_HUMAN Luc7-like protein 3 OS=Homo sapiens GN=LUC7L3 PE=1 SV=2;tr|D6RDI2|D6RDI2_HUMAN Luc7-like protein 3 (Fragme	11	18	18	18	18	17	17	18	18	18	18	17	17	18	18	18	18	17	17	18	18	18	29.7	29.7	29.7	58.22	489	489;432;184;79;39;54;207;36;47;118;123	0	245.21	By MS/MS	By MS/MS	By MS/MS	By MS/MS	By MS/MS	By MS/MS	29.7	28.2	28.2	29.7	29.7	29.7
P19338;H7BY16;C9JYW2;C9JLB1;C9J1H7;C9JWL1	P19338;H7BY16	18;11;1;1;1;1	18;11;1;1;1;1	18;11;1;1;1;1	Nucleolin	NCL	sp|P19338|NUCL_HUMAN Nucleolin OS=Homo sapiens GN=NCL PE=1 SV=3;tr|H7BY16|H7BY16_HUMAN Nucleolin (Fragment) OS=Homo sapiens GN=NCL PE=1 SV=7	6	18	18	18	14	13	16	16	17	12	14	13	16	16	17	12	14	13	16	16	17	12	29.4	29.4	29.4	76.613	710	710;297;141;151;166;170	0	136.11	By MS/MS	By MS/MS	By MS/MS	By MS/MS	By MS/MS	By MS/MS	23.7	23.7	28.2	27.5	27.5	22.8
P62701;C9JEH7;P22090;Q8TD47	P62701	18;8;8;7	18;8;8;7	18;8;8;7	40S ribosomal protein S4, X isoform	RPS4X	sp|P62701|RS4X_HUMAN 40S ribosomal protein S4, X isoform OS=Homo sapiens GN=RPS4X PE=1 SV=2	4	18	18	18	16	15	17	17	18	17	16	15	17	17	18	17	16	15	17	17	18	17	62.7	62.7	62.7	29.597	263	263;262;263;263	0	124.99	By MS/MS	By MS/MS	By MS/MS	By MS/MS	By MS/MS	By MS/MS	62	62	62	62.7	62.7	62.7
Q08170;A0A0D9SEM4;A0A0D9SGD2;S4R2X6	Q08170;A0A0D9SEM4	27;26;3;3	27;26;3;3	18;17;0;2	Serine/arginine-rich splicing factor 4	SRSF4	sp|Q08170|SRSF4_HUMAN Serine/arginine-rich splicing factor 4 OS=Homo sapiens GN=SRSF4 PE=1 SV=2;tr|A0A0D9SEM4|A0A0D9SEM4_HUMAN Serine/arginine-rich-splicing factor 4 (Fragment) OS=Homo sapiens GN=SRSF4 PE=1 SV=1	4	27	27	18	24	27	26	24	24	25	24	27	26	24	24	25	16	18	18	16	18	17	31.2	31.2	22.5	56.678	494	494;378;45;160	0	323.31	By MS/MS	By MS/MS	By MS/MS	By MS/MS	By MS/MS	By MS/MS	28.5	31.2	31	29.4	30.2	29.1
Q9H307;G3V5F0;G3V579	Q9H307;G3V5F0;G3V579	18;9;9	18;9;9	18;9;9	Pinin	PNN	sp|Q9H307|PININ_HUMAN Pinin OS=Homo sapiens GN=PNN PE=1 SV=4;tr|G3V5F0|G3V5F0_HUMAN Pinin OS=Homo sapiens GN=PNN PE=1 SV=1;tr|G3V579|G3V579_HUMAN Pinin OS=Homo sapiens GN=PNN PE=1 SV=1	3	18	18	18	15	17	18	17	16	15	15	17	18	17	16	15	15	17	18	17	16	15	25.7	25.7	25.7	81.613	717	717;117;124	0	138.51	By MS/MS	By MS/MS	By MS/MS	By MS/MS	By MS/MS	By MS/MS	22.5	24.1	25.7	25.4	24.3	22.9
A0A024R4M0;P46781;B5MCT8;C9JM19;F2Z3C0;A8MXK4	A0A024R4M0;P46781;B5MCT8;C9JM19	17;17;13;13;4;4	17;17;13;13;4;4	17;17;13;13;4;4	40S ribosomal protein S9	RPS9	tr|A0A024R4M0|A0A024R4M0_HUMAN 40S ribosomal protein S9 OS=Homo sapiens GN=RPS9 PE=1 SV=1;sp|P46781|RS9_HUMAN 40S ribosomal protein S9 OS=Homo sapiens GN=RPS9 PE=1 SV=3;tr|B5MCT8|B5MCT8_HUMAN 40S ribosomal protein S9 OS=Homo sapiens GN=RPS9 PE=1 SV=1;tr|C9	6	17	17	17	12	12	14	17	16	12	12	12	14	17	16	12	12	12	14	17	16	12	49	49	49	22.591	194	194;194;139;156;77;79	0	110.87	By MS/MS	By MS/MS	By MS/MS	By MS/MS	By MS/MS	By MS/MS	42.8	42.8	48.5	49	49	47.4
A0A0A0MRM9;Q14978;S4R349;S4R3C2;S4R402;S4R341	A0A0A0MRM9;Q14978	17;17;4;3;2;2	17;17;4;3;2;2	17;17;4;3;2;2	Nucleolar and coiled-body phosphoprotein 1	NOLC1	tr|A0A0A0MRM9|A0A0A0MRM9_HUMAN Nucleolar and coiled-body phosphoprotein 1 (Fragment) OS=Homo sapiens GN=NOLC1 PE=1 SV=1;sp|Q14978|NOLC1_HUMAN Nucleolar and coiled-body phosphoprotein 1 OS=Homo sapiens GN=NOLC1 PE=1 SV=2	6	17	17	17	16	14	15	16	14	14	16	14	15	16	14	14	16	14	15	16	14	14	19.4	19.4	19.4	74.543	708	708;699;258;281;46;73	0	168.18	By MS/MS	By MS/MS	By MS/MS	By MS/MS	By MS/MS	By MS/MS	17.8	15.5	15.5	17.8	15.1	15.1
P10809;E7EXB4;E7ESH4;C9JL25;C9JL19;C9JCQ4	P10809	17;8;8;2;1;1	17;8;8;2;1;1	17;8;8;2;1;1	60 kDa heat shock protein, mitochondrial	HSPD1	sp|P10809|CH60_HUMAN 60 kDa heat shock protein, mitochondrial OS=Homo sapiens GN=HSPD1 PE=1 SV=2	6	17	17	17	7	8	15	14	15	15	7	8	15	14	15	15	7	8	15	14	15	15	36	36	36	61.054	573	573;221;234;175;83;94	0	120.37	By matching	By matching	By MS/MS	By MS/MS	By MS/MS	By MS/MS	16.1	18.7	32.3	30.2	31.8	31.6
P18124;A8MUD9;C9JIJ5;C9JZ88	P18124;A8MUD9	17;15;4;3	17;15;4;3	17;15;4;3	60S ribosomal protein L7	RPL7	sp|P18124|RL7_HUMAN 60S ribosomal protein L7 OS=Homo sapiens GN=RPL7 PE=1 SV=1;tr|A8MUD9|A8MUD9_HUMAN 60S ribosomal protein L7 OS=Homo sapiens GN=RPL7 PE=1 SV=1	4	17	17	17	12	12	11	17	14	15	12	12	11	17	14	15	12	12	11	17	14	15	53.2	53.2	53.2	29.225	248	248;208;99;88	0	143.41	By MS/MS	By MS/MS	By MS/MS	By MS/MS	By MS/MS	By MS/MS	35.5	42.7	35.1	53.2	48	50
P26368;K7ENG2;K7ELP8	P26368;K7ENG2	17;14;3	17;14;3	17;14;3	Splicing factor U2AF 65 kDa subunit	U2AF2	sp|P26368|U2AF2_HUMAN Splicing factor U2AF 65 kDa subunit OS=Homo sapiens GN=U2AF2 PE=1 SV=4;tr|K7ENG2|K7ENG2_HUMAN Splicing factor U2AF 65 kDa subunit OS=Homo sapiens GN=U2AF2 PE=1 SV=1	3	17	17	17	16	17	17	16	17	17	16	17	17	16	17	17	16	17	17	16	17	17	44.6	44.6	44.6	53.5	475	475;307;86	0	138.57	By MS/MS	By MS/MS	By MS/MS	By MS/MS	By MS/MS	By MS/MS	36.6	44.6	44.6	36.6	44.6	44.6
Q7Z4V5;K7ERA4;K7EPS6;M0R0J3;H3BPQ6;A0A087WX58;A0A024R216;A0A087WT54;Q9Y3E1;O75475	Q7Z4V5;K7ERA4	18;12;8;4;1;1;1;1;1;1	18;12;8;4;1;1;1;1;1;1	17;12;8;3;0;1;0;1;0;0	Hepatoma-derived growth factor-related protein 2	HDGFRP2	sp|Q7Z4V5|HDGR2_HUMAN Hepatoma-derived growth factor-related protein 2 OS=Homo sapiens GN=HDGFRP2 PE=1 SV=1;tr|K7ERA4|K7ERA4_HUMAN Hepatoma-derived growth factor-related protein 2 (Fragment) OS=Homo sapiens GN=HDGFRP2 PE=1 SV=1	10	18	18	17	18	17	17	16	17	17	18	17	17	16	17	17	17	16	16	15	16	16	26.5	26.5	25	74.316	671	671;175;153;97;44;68;203;473;203;530	0	129.03	By MS/MS	By MS/MS	By MS/MS	By MS/MS	By MS/MS	By MS/MS	26.5	26.5	26.5	23.5	26.5	26.5
Q9BUQ8;H0YI52;F8VVA2;H0YIL9	Q9BUQ8	17;3;1;1	17;3;1;1	17;3;1;1	Probable ATP-dependent RNA helicase DDX23	DDX23	sp|Q9BUQ8|DDX23_HUMAN Probable ATP-dependent RNA helicase DDX23 OS=Homo sapiens GN=DDX23 PE=1 SV=3	4	17	17	17	16	15	13	15	15	15	16	15	13	15	15	15	16	15	13	15	15	15	22.4	22.4	22.4	95.581	820	820;152;182;259	0	110.53	By MS/MS	By MS/MS	By MS/MS	By MS/MS	By MS/MS	By MS/MS	20.9	20.2	17.2	19.9	19.9	19.9
J3QK89;Q8IWX8	J3QK89;Q8IWX8	16;16	16;16	16;16	Calcium homeostasis endoplasmic reticulum protein	CHERP	tr|J3QK89|J3QK89_HUMAN Calcium homeostasis endoplasmic reticulum protein OS=Homo sapiens GN=CHERP PE=1 SV=1;sp|Q8IWX8|CHERP_HUMAN Calcium homeostasis endoplasmic reticulum protein OS=Homo sapiens GN=CHERP PE=1 SV=3	2	16	16	16	12	13	11	13	14	16	12	13	11	13	14	16	12	13	11	13	14	16	20.2	20.2	20.2	104.93	927	927;916	0	150.64	By MS/MS	By MS/MS	By MS/MS	By MS/MS	By MS/MS	By MS/MS	15.4	19	14.3	16.6	20.1	20.2
P06733;K7EM90;E5RI09;E5RG95;K7EPM1;K7EKN2;E5RGZ4;P13929	P06733	17;8;1;1;1;1;1;1	17;8;1;1;1;1;1;1	16;7;0;0;0;0;0;0	Alpha-enolase	ENO1	sp|P06733|ENOA_HUMAN Alpha-enolase OS=Homo sapiens GN=ENO1 PE=1 SV=2	8	17	17	16	12	10	15	16	16	15	12	10	15	16	16	15	11	9	14	15	15	14	45.6	45.6	41.5	47.168	434	434;195;148;154;196;212;283;434	0	136.55	By MS/MS	By MS/MS	By MS/MS	By MS/MS	By MS/MS	By MS/MS	38.2	33.6	43.8	45.6	42.9	42.9
P14618;H3BTN5;B4DNK4;H3BQ34;H3BUW1;H3BTJ2;H3BT25;H3BR70;H3BU13;H3BN34;H3BQZ3;P30613	P14618;H3BTN5;B4DNK4;H3BQ34;H3BUW1;H3BTJ2;H3BT25	16;15;12;11;9;9;8;7;3;2;2;1	16;15;12;11;9;9;8;7;3;2;2;1	16;15;12;11;9;9;8;7;3;2;2;1	Pyruvate kinase PKM;Pyruvate kinase	PKM	sp|P14618|KPYM_HUMAN Pyruvate kinase PKM OS=Homo sapiens GN=PKM PE=1 SV=4;tr|H3BTN5|H3BTN5_HUMAN Pyruvate kinase (Fragment) OS=Homo sapiens GN=PKM PE=1 SV=1;tr|B4DNK4|B4DNK4_HUMAN Pyruvate kinase OS=Homo sapiens GN=PKM PE=1 SV=1;tr|H3BQ34|H3BQ34_HUMAN Pyru	12	16	16	16	14	12	12	15	16	16	14	12	12	15	16	16	14	12	12	15	16	16	35.8	35.8	35.8	57.936	531	531;485;457;281;162;168;151;366;82;52;69;574	0	203.57	By MS/MS	By MS/MS	By MS/MS	By MS/MS	By MS/MS	By MS/MS	29.8	28.2	25.6	29.9	35.8	35.8
P31948;F5H783;F5GXD8;H0YGI8	P31948;F5H783	16;9;6;2	16;9;6;2	16;9;6;2	Stress-induced-phosphoprotein 1	STIP1	sp|P31948|STIP1_HUMAN Stress-induced-phosphoprotein 1 OS=Homo sapiens GN=STIP1 PE=1 SV=1;tr|F5H783|F5H783_HUMAN Stress-induced-phosphoprotein 1 OS=Homo sapiens GN=STIP1 PE=1 SV=1	4	16	16	16	15	11	16	16	15	15	15	11	16	16	15	15	15	11	16	16	15	15	30	30	30	62.639	543	543;236;138;137	0	106.72	By MS/MS	By MS/MS	By MS/MS	By MS/MS	By MS/MS	By MS/MS	27.8	23	30	30	27.8	29.3
P62424;Q5T8U2;Q5T8U3	P62424;Q5T8U2;Q5T8U3	16;10;8	16;10;8	16;10;8	60S ribosomal protein L7a	RPL7A	sp|P62424|RL7A_HUMAN 60S ribosomal protein L7a OS=Homo sapiens GN=RPL7A PE=1 SV=2;tr|Q5T8U2|Q5T8U2_HUMAN 60S ribosomal protein L7a OS=Homo sapiens GN=RPL7A PE=1 SV=1;tr|Q5T8U3|Q5T8U3_HUMAN 60S ribosomal protein L7a (Fragment) OS=Homo sapiens GN=RPL7A PE=1	3	16	16	16	14	15	16	16	15	14	14	15	16	16	15	14	14	15	16	16	15	14	49.2	49.2	49.2	29.995	266	266;151;191	0	145.39	By MS/MS	By MS/MS	By MS/MS	By MS/MS	By MS/MS	By MS/MS	45.1	45.5	49.2	49.2	48.5	45.1
Q9NWB6;X6R9F1	Q9NWB6	16;5	16;5	16;5	Arginine and glutamate-rich protein 1	ARGLU1	sp|Q9NWB6|ARGL1_HUMAN Arginine and glutamate-rich protein 1 OS=Homo sapiens GN=ARGLU1 PE=1 SV=1	2	16	16	16	15	13	14	13	14	13	15	13	14	13	14	13	15	13	14	13	14	13	34.1	34.1	34.1	33.216	273	273;142	0	115.72	By MS/MS	By MS/MS	By MS/MS	By MS/MS	By MS/MS	By MS/MS	34.1	31.1	31.1	30.8	31.5	28.6
J3QR09;J3KTE4;P84098;J3QL15	J3QR09;J3KTE4;P84098	15;15;15;7	15;15;15;7	15;15;15;7	Ribosomal protein L19;60S ribosomal protein L19	RPL19	tr|J3QR09|J3QR09_HUMAN Ribosomal protein L19 OS=Homo sapiens GN=RPL19 PE=1 SV=1;tr|J3KTE4|J3KTE4_HUMAN Ribosomal protein L19 OS=Homo sapiens GN=RPL19 PE=1 SV=1;sp|P84098|RL19_HUMAN 60S ribosomal protein L19 OS=Homo sapiens GN=RPL19 PE=1 SV=1	4	15	15	15	13	15	14	15	15	15	13	15	14	15	15	15	13	15	14	15	15	15	50.3	50.3	50.3	23.134	193	193;194;196;128	0	190.76	By MS/MS	By MS/MS	By MS/MS	By MS/MS	By MS/MS	By MS/MS	47.7	50.3	50.3	50.3	50.3	50.3
J3KTL2;Q07955;J3QQV5;J3KSW7;J3KSR8	J3KTL2;Q07955	15;15;7;7;6	15;15;7;7;6	15;15;7;7;6	Serine/arginine-rich splicing factor 1	SRSF1	tr|J3KTL2|J3KTL2_HUMAN Serine/arginine-rich-splicing factor 1 OS=Homo sapiens GN=SRSF1 PE=1 SV=1;sp|Q07955|SRSF1_HUMAN Serine/arginine-rich splicing factor 1 OS=Homo sapiens GN=SRSF1 PE=1 SV=2	5	15	15	15	13	14	13	15	12	13	13	14	13	15	12	13	13	14	13	15	12	13	51	51	51	28.329	253	253;248;65;73;143	0	163.34	By MS/MS	By MS/MS	By MS/MS	By MS/MS	By MS/MS	By MS/MS	43.9	44.7	41.9	51	43.9	43.9
P09874;Q5VX84;Q5VX85	P09874	15;1;1	15;1;1	15;1;1	Poly [ADP-ribose] polymerase 1	PARP1	sp|P09874|PARP1_HUMAN Poly [ADP-ribose] polymerase 1 OS=Homo sapiens GN=PARP1 PE=1 SV=4	3	15	15	15	4	5	9	15	15	11	4	5	9	15	15	11	4	5	9	15	15	11	19	19	19	113.08	1014	1014;108;155	0	101.72	By MS/MS	By MS/MS	By MS/MS	By MS/MS	By MS/MS	By MS/MS	5.1	7.5	12	19	19	13.2
P35579;Q5BKV1;B1AH99	P35579	18;3;1	18;3;1	15;2;1	Myosin-9	MYH9	sp|P35579|MYH9_HUMAN Myosin-9 OS=Homo sapiens GN=MYH9 PE=1 SV=4	3	18	18	15	17	12	11	16	14	14	17	12	11	16	14	14	14	10	9	13	12	12	11	11	9	226.53	1960	1960;218;103	0	116.41	By MS/MS	By MS/MS	By MS/MS	By MS/MS	By MS/MS	By MS/MS	10.3	7	6.6	9.8	8.4	8.6
P40429;M0QYS1;Q8J015;Q6NVV1;M0QZU1;A0A096LPE0	P40429;M0QYS1;Q8J015	15;13;12;4;2;2	15;13;12;4;2;2	15;13;12;4;2;2	60S ribosomal protein L13a	RPL13A;RPL13a	sp|P40429|RL13A_HUMAN 60S ribosomal protein L13a OS=Homo sapiens GN=RPL13A PE=1 SV=2;tr|M0QYS1|M0QYS1_HUMAN 60S ribosomal protein L13a (Fragment) OS=Homo sapiens GN=RPL13A PE=1 SV=2;tr|Q8J015|Q8J015_HUMAN 60S ribosomal protein L13a OS=Homo sapiens GN=RPL13	6	15	15	15	13	15	15	14	15	13	13	15	15	14	15	13	13	15	15	14	15	13	50.7	50.7	50.7	23.577	203	203;210;142;102;46;48	0	166.93	By MS/MS	By MS/MS	By MS/MS	By MS/MS	By MS/MS	By MS/MS	47.3	50.7	50.7	50.7	50.7	47.8
P40926;G3XAL0	P40926;G3XAL0	15;12	15;12	15;12	Malate dehydrogenase, mitochondrial;Malate dehydrogenase	MDH2	sp|P40926|MDHM_HUMAN Malate dehydrogenase, mitochondrial OS=Homo sapiens GN=MDH2 PE=1 SV=3;tr|G3XAL0|G3XAL0_HUMAN Malate dehydrogenase OS=Homo sapiens GN=MDH2 PE=1 SV=1	2	15	15	15	8	4	9	14	15	14	8	4	9	14	15	14	8	4	9	14	15	14	63	63	63	35.503	338	338;231	0	108.25	By matching	By matching	By MS/MS	By MS/MS	By MS/MS	By MS/MS	32.5	18.3	37.9	59.8	63	59.8
P61247;D6RAT0;D6RG13;D6RB09;H0Y9Y4;D6R9B6;E9PFI5;H0Y8L7;D6RAS7;D6RED7;D6RGE0;D6RI02	P61247;D6RAT0;D6RG13;D6RB09;H0Y9Y4;D6R9B6;E9PFI5;H0Y8L7	15;14;13;11;10;9;9;8;7;5;4;3	15;14;13;11;10;9;9;8;7;5;4;3	15;14;13;11;10;9;9;8;7;5;4;3	40S ribosomal protein S3a	RPS3A	sp|P61247|RS3A_HUMAN 40S ribosomal protein S3a OS=Homo sapiens GN=RPS3A PE=1 SV=2;tr|D6RAT0|D6RAT0_HUMAN 40S ribosomal protein S3a OS=Homo sapiens GN=RPS3A PE=1 SV=1;tr|D6RG13|D6RG13_HUMAN 40S ribosomal protein S3a (Fragment) OS=Homo sapiens GN=RPS3A PE=1	12	15	15	15	9	8	10	15	15	13	9	8	10	15	15	13	9	8	10	15	15	13	49.6	49.6	49.6	29.945	264	264;227;223;194;208;145;205;190;125;101;65;95	0	120.41	By MS/MS	By MS/MS	By MS/MS	By MS/MS	By MS/MS	By MS/MS	39.4	33	40.5	49.6	49.6	46.6
Q5T8P6;A0A087X0H9;E2PSN0	Q5T8P6;A0A087X0H9	17;16;4	17;16;4	15;14;4	RNA-binding protein 26	RBM26	sp|Q5T8P6|RBM26_HUMAN RNA-binding protein 26 OS=Homo sapiens GN=RBM26 PE=1 SV=3;tr|A0A087X0H9|A0A087X0H9_HUMAN RNA-binding protein 26 OS=Homo sapiens GN=RBM26 PE=1 SV=1	3	17	17	15	15	14	16	14	14	13	15	14	16	14	14	13	14	13	15	13	12	12	16.2	16.2	14.9	113.6	1007	1007;1009;171	0	141.96	By MS/MS	By MS/MS	By MS/MS	By MS/MS	By MS/MS	By MS/MS	15.5	15.5	16.2	15.1	13.3	15.1
Q9BXP5;H7C3A1;H7C1K0;H7C0U8;A0A0A0MSP6	Q9BXP5;H7C3A1	15;12;3;1;1	15;12;3;1;1	15;12;3;1;1	Serrate RNA effector molecule homolog	SRRT	sp|Q9BXP5|SRRT_HUMAN Serrate RNA effector molecule homolog OS=Homo sapiens GN=SRRT PE=1 SV=1;tr|H7C3A1|H7C3A1_HUMAN Serrate RNA effector molecule homolog (Fragment) OS=Homo sapiens GN=SRRT PE=1 SV=1	5	15	15	15	14	14	12	14	14	13	14	14	12	14	14	13	14	14	12	14	14	13	19.2	19.2	19.2	100.67	876	876;499;47;77;149	0	100.25	By MS/MS	By MS/MS	By MS/MS	By MS/MS	By MS/MS	By MS/MS	17.9	18.3	15.3	18.3	18.3	16.3
A0A087WXM6;J3QQT2;J3KRX5;A0A0A6YYL6;P18621;J3KRB3;A0A087WWH0;J3QS96;J3QLC8;A0A0A0MRF8;A0A087WY81;J3KSJ0	A0A087WXM6;J3QQT2;J3KRX5;A0A0A6YYL6;P18621;J3KRB3;A0A087WWH0;J3QS96;J3QLC8;A0A0A0MRF8;A0A087WY81	14;14;14;14;14;11;11;11;11;10;9;5	14;14;14;14;14;11;11;11;11;10;9;5	14;14;14;14;14;11;11;11;11;10;9;5	60S ribosomal protein L17	RPL17;RPL17-C18orf32	tr|A0A087WXM6|A0A087WXM6_HUMAN 60S ribosomal protein L17 (Fragment) OS=Homo sapiens GN=RPL17 PE=3 SV=1;tr|J3QQT2|J3QQT2_HUMAN 60S ribosomal protein L17 (Fragment) OS=Homo sapiens GN=RPL17 PE=3 SV=1;tr|J3KRX5|J3KRX5_HUMAN 60S ribosomal protein L17 (Fragment	12	14	14	14	6	8	9	12	13	13	6	8	9	12	13	13	6	8	9	12	13	13	70.4	70.4	70.4	19.586	169	169;171;174;228;184;129;132;138;174;190;98;56	0	94.287	By MS/MS	By matching	By MS/MS	By MS/MS	By MS/MS	By MS/MS	47.9	45.6	58	59.8	69.8	63.3
E7EVA0;P27816;H0Y2V1;H7C4C5;B5MEG9;F8W9U4	E7EVA0;P27816	14;14;5;5;5;5	14;14;5;5;5;5	14;14;5;5;5;5	Microtubule-associated protein;Microtubule-associated protein 4	MAP4	tr|E7EVA0|E7EVA0_HUMAN Microtubule-associated protein OS=Homo sapiens GN=MAP4 PE=1 SV=1;sp|P27816|MAP4_HUMAN Microtubule-associated protein 4 OS=Homo sapiens GN=MAP4 PE=1 SV=3	6	14	14	14	11	9	12	13	12	13	11	9	12	13	12	13	11	9	12	13	12	13	8.9	8.9	8.9	245.44	2297	2297;1152;463;493;761;828	0	132.74	By MS/MS	By MS/MS	By MS/MS	By MS/MS	By MS/MS	By MS/MS	7.1	5.7	7.5	8.3	7.7	8.3
P49207	P49207	14	14	14	60S ribosomal protein L34	RPL34	sp|P49207|RL34_HUMAN 60S ribosomal protein L34 OS=Homo sapiens GN=RPL34 PE=1 SV=3	1	14	14	14	11	12	13	13	13	12	11	12	13	13	13	12	11	12	13	13	13	12	58.1	58.1	58.1	13.293	117	117	0	102.22	By MS/MS	By MS/MS	By MS/MS	By MS/MS	By MS/MS	By MS/MS	53.8	53.8	53.8	53.8	53.8	57.3
Q8WVK2;B8ZZ98;H0YBW5	Q8WVK2	14;4;2	14;4;2	14;4;2	U4/U6.U5 small nuclear ribonucleoprotein 27 kDa protein	SNRNP27	sp|Q8WVK2|SNR27_HUMAN U4/U6.U5 small nuclear ribonucleoprotein 27 kDa protein OS=Homo sapiens GN=SNRNP27 PE=1 SV=1	3	14	14	14	14	14	14	13	13	12	14	14	14	13	13	12	14	14	14	13	13	12	45.8	45.8	45.8	18.86	155	155;158;18	0	164.05	By MS/MS	By MS/MS	By MS/MS	By MS/MS	By MS/MS	By MS/MS	45.8	45.8	45.8	45.8	45.2	45.2
A0A087WTT1;P11940;E7EQV3;E7ERJ7;H0YAR2;Q9H361;H0YBN4;H0YAP2;H0YB86;E5RGH3;E5RH24;E5RJB9;Q4VXU2;H0YC10;E5RHG7;H0YAS7;H0YAS6;H0YB75;E5RGC4;E5RFD8;Q96DU9	A0A087WTT1;P11940;E7EQV3;E7ERJ7;H0YAR2	20;20;19;19;12;9;7;6;6;5;5;5;4;2;2;2;2;2;1;1;1	20;20;19;19;12;9;7;6;6;5;5;5;4;2;2;2;2;2;1;1;1	13;13;13;12;9;6;2;6;5;2;1;1;2;2;0;2;2;2;0;0;1	Polyadenylate-binding protein;Polyadenylate-binding protein 1	PABPC1	tr|A0A087WTT1|A0A087WTT1_HUMAN Polyadenylate-binding protein OS=Homo sapiens GN=PABPC1 PE=1 SV=1;sp|P11940|PABP1_HUMAN Polyadenylate-binding protein 1 OS=Homo sapiens GN=PABPC1 PE=1 SV=2;tr|E7EQV3|E7EQV3_HUMAN Polyadenylate-binding protein OS=Homo sapiens	21	20	20	13	14	14	16	17	18	15	14	14	16	17	18	15	9	9	11	11	11	9	39.1	39.1	22.8	58.535	522	522;636;591;604;284;631;175;131;165;108;118;129;614;42;75;136;169;183;43;61;382	0	159.26	By MS/MS	By MS/MS	By MS/MS	By MS/MS	By MS/MS	By MS/MS	27.8	27.8	31.6	33.9	34.7	30.5
A0A0G2JIW1;P0DMV9;P0DMV8;V9GZ37	A0A0G2JIW1;P0DMV9;P0DMV8;V9GZ37	26;26;26;15	23;23;23;13	13;13;13;7	Heat shock 70 kDa protein 1B;Heat shock 70 kDa protein 1A	HSPA1B;HSPA1A	tr|A0A0G2JIW1|A0A0G2JIW1_HUMAN Heat shock 70 kDa protein 1B OS=Homo sapiens GN=HSPA1B PE=1 SV=1;sp|P0DMV9|HS71B_HUMAN Heat shock 70 kDa protein 1B OS=Homo sapiens GN=HSPA1B PE=1 SV=1;sp|P0DMV8|HS71A_HUMAN Heat shock 70 kDa protein 1A OS=Homo sapiens GN=HSP	4	26	23	13	22	20	22	25	25	25	20	18	19	22	22	22	11	9	10	12	12	12	47.2	42.7	25.4	70.108	642	642;641;641;476	0	231.83	By MS/MS	By MS/MS	By MS/MS	By MS/MS	By MS/MS	By MS/MS	38.2	35.4	41.6	42.4	42.4	45.6
A0A0U1RQF0;P49327	A0A0U1RQF0;P49327	13;13	13;13	13;13	Fatty acid synthase;[Acyl-carrier-protein] S-acetyltransferase;[Acyl-carrier-protein] S-malonyltransferase;3-oxoacyl-[acyl-carrier-protein] synthase;3-oxoacyl-[acyl-carrier-protein] reductase;3-hydroxyacyl-[acyl-carrier-protein] dehydratase;Enoyl-[acyl-carrier-protein] reductase;Oleoyl-[acyl-carrier-protein] hydrolase	FASN	tr|A0A0U1RQF0|A0A0U1RQF0_HUMAN Fatty acid synthase OS=Homo sapiens GN=FASN PE=1 SV=1;sp|P49327|FAS_HUMAN Fatty acid synthase OS=Homo sapiens GN=FASN PE=1 SV=3	2	13	13	13	9	8	9	13	12	10	9	8	9	13	12	10	9	8	9	13	12	10	6.9	6.9	6.9	273.2	2509	2509;2511	0	86.217	By MS/MS	By matching	By MS/MS	By MS/MS	By MS/MS	By MS/MS	4.9	4.6	5.1	6.9	6.4	5.6
P00558;P07205	P00558	13;3	13;3	13;3	Phosphoglycerate kinase 1	PGK1	sp|P00558|PGK1_HUMAN Phosphoglycerate kinase 1 OS=Homo sapiens GN=PGK1 PE=1 SV=3	2	13	13	13	8	8	9	11	13	13	8	8	9	11	13	13	8	8	9	11	13	13	39.6	39.6	39.6	44.614	417	417;417	0	102.13	By matching	By matching	By MS/MS	By MS/MS	By MS/MS	By MS/MS	23	23	26.6	35	39.6	39.6
P07900;G3V2J8;Q14568;Q58FG1;Q58FG0;Q58FF6	P07900	20;4;3;2;1;1	13;2;1;1;1;0	13;2;1;1;1;0	Heat shock protein HSP 90-alpha	HSP90AA1	sp|P07900|HS90A_HUMAN Heat shock protein HSP 90-alpha OS=Homo sapiens GN=HSP90AA1 PE=1 SV=5	6	20	13	13	17	15	16	20	20	19	10	9	10	13	13	12	10	9	10	13	13	12	30.6	18.9	18.9	84.659	732	732;174;343;418;334;505	0	114.64	By MS/MS	By MS/MS	By MS/MS	By MS/MS	By MS/MS	By MS/MS	25.1	24.6	24.6	30.6	30.6	29.6
P31939;H7C1S2;F8WEF0;C9JLK0	P31939	13;4;3;3	13;4;3;3	13;4;3;3	Bifunctional purine biosynthesis protein PURH;Phosphoribosylaminoimidazolecarboxamide formyltransferase;IMP cyclohydrolase	ATIC	sp|P31939|PUR9_HUMAN Bifunctional purine biosynthesis protein PURH OS=Homo sapiens GN=ATIC PE=1 SV=3	4	13	13	13	8	9	9	11	12	10	8	9	9	11	12	10	8	9	9	11	12	10	31.9	31.9	31.9	64.615	592	592;231;84;170	0	88.956	By MS/MS	By MS/MS	By MS/MS	By MS/MS	By MS/MS	By MS/MS	18.4	20.6	20.6	27.2	28.7	24.3
P35580;E7ERA5;B1PS43;P35749;Q7Z406;A0A0C4DFM8;A1L2Z2;M0QY43	P35580	16;4;3;3;2;1;1;1	13;3;1;1;0;0;0;0	13;3;1;1;0;0;0;0	Myosin-10	MYH10	sp|P35580|MYH10_HUMAN Myosin-10 OS=Homo sapiens GN=MYH10 PE=1 SV=3	8	16	13	13	15	12	11	13	12	11	12	10	9	10	10	9	12	10	9	10	10	9	9	7	7	229	1976	1976;188;2029;1972;1995;508;638;1003	0	82.992	By MS/MS	By MS/MS	By MS/MS	By MS/MS	By MS/MS	By MS/MS	8.6	6.4	5.9	7.3	6.6	6.3
P38646;D6RJI2;D6RA73;H0YBG6;H0Y8S0	P38646	13;5;4;2;1	13;5;4;2;1	13;5;4;2;1	Stress-70 protein, mitochondrial	HSPA9	sp|P38646|GRP75_HUMAN Stress-70 protein, mitochondrial OS=Homo sapiens GN=HSPA9 PE=1 SV=2	5	13	13	13	8	7	10	13	11	11	8	7	10	13	11	11	8	7	10	13	11	11	23.1	23.1	23.1	73.68	679	679;95;62;163;102	0	84.287	By MS/MS	By matching	By MS/MS	By MS/MS	By MS/MS	By MS/MS	16.1	14.3	17.4	23.1	19.7	19.3
P46779;H0YKD8;H0YMF4;H0YLP6	P46779;H0YKD8;H0YMF4;H0YLP6	13;12;9;8	13;12;9;8	13;12;9;8	60S ribosomal protein L28	RPL28	sp|P46779|RL28_HUMAN 60S ribosomal protein L28 OS=Homo sapiens GN=RPL28 PE=1 SV=3;tr|H0YKD8|H0YKD8_HUMAN 60S ribosomal protein L28 OS=Homo sapiens GN=RPL28 PE=1 SV=1;tr|H0YMF4|H0YMF4_HUMAN 60S ribosomal protein L28 OS=Homo sapiens GN=RPL28 PE=1 SV=1;tr|H0Y	4	13	13	13	11	12	13	13	13	13	11	12	13	13	13	13	11	12	13	13	13	13	73	73	73	15.747	137	137;170;112;89	0	225.37	By MS/MS	By MS/MS	By MS/MS	By MS/MS	By MS/MS	By MS/MS	67.9	66.4	73	73	73	73
P62280;M0QZC5;M0R1H5;M0R1H6	P62280;M0QZC5	13;11;5;3	13;11;5;3	13;11;5;3	40S ribosomal protein S11	RPS11	sp|P62280|RS11_HUMAN 40S ribosomal protein S11 OS=Homo sapiens GN=RPS11 PE=1 SV=3;tr|M0QZC5|M0QZC5_HUMAN 40S ribosomal protein S11 OS=Homo sapiens GN=RPS11 PE=1 SV=1	4	13	13	13	10	10	12	13	12	12	10	10	12	13	12	12	10	10	12	13	12	12	70.9	70.9	70.9	18.431	158	158;118;79;88	0	123.8	By MS/MS	By MS/MS	By MS/MS	By MS/MS	By MS/MS	By MS/MS	58.2	58.2	70.3	70.9	70.3	70.3
P62753;A2A3R5;A2A3R7	P62753;A2A3R5	13;9;5	13;9;5	13;9;5	40S ribosomal protein S6	RPS6	sp|P62753|RS6_HUMAN 40S ribosomal protein S6 OS=Homo sapiens GN=RPS6 PE=1 SV=1;tr|A2A3R5|A2A3R5_HUMAN 40S ribosomal protein S6 OS=Homo sapiens GN=RPS6 PE=1 SV=1	3	13	13	13	13	13	13	13	13	13	13	13	13	13	13	13	13	13	13	13	13	13	51	51	51	28.68	249	249;218;91	0	151.49	By MS/MS	By MS/MS	By MS/MS	By MS/MS	By MS/MS	By MS/MS	51	51	51	51	51	51
P84103;A0A087X2D0	P84103;A0A087X2D0	14;9	13;8	13;8	Serine/arginine-rich splicing factor 3	SRSF3	sp|P84103|SRSF3_HUMAN Serine/arginine-rich splicing factor 3 OS=Homo sapiens GN=SRSF3 PE=1 SV=1;tr|A0A087X2D0|A0A087X2D0_HUMAN Serine/arginine-rich-splicing factor 3 OS=Homo sapiens GN=SRSF3 PE=1 SV=1	2	14	13	13	14	14	14	14	14	13	13	13	13	13	13	12	13	13	13	13	13	12	51.8	51.8	51.8	19.329	164	164;95	0	218.11	By MS/MS	By MS/MS	By MS/MS	By MS/MS	By MS/MS	By MS/MS	51.8	51.8	51.8	51.8	51.8	51.8
Q13247	Q13247	22	13	13	Serine/arginine-rich splicing factor 6	SRSF6	sp|Q13247|SRSF6_HUMAN Serine/arginine-rich splicing factor 6 OS=Homo sapiens GN=SRSF6 PE=1 SV=2	1	22	13	13	21	22	21	21	18	21	13	13	13	13	12	13	13	13	13	13	12	13	45.6	31.1	31.1	39.586	344	344	0	166.81	By MS/MS	By MS/MS	By MS/MS	By MS/MS	By MS/MS	By MS/MS	44.5	45.6	45.3	45.6	41.6	44.5
Q16629;A0A0B4J1Z1;C9JAB2;F8WEA1;H7BZZ6	Q16629;A0A0B4J1Z1;C9JAB2	14;13;13;2;1	14;13;13;2;1	13;12;12;2;1	Serine/arginine-rich splicing factor 7	SRSF7	sp|Q16629|SRSF7_HUMAN Serine/arginine-rich splicing factor 7 OS=Homo sapiens GN=SRSF7 PE=1 SV=1;tr|A0A0B4J1Z1|A0A0B4J1Z1_HUMAN Serine/arginine-rich-splicing factor 7 OS=Homo sapiens GN=SRSF7 PE=1 SV=1;tr|C9JAB2|C9JAB2_HUMAN Serine/arginine-rich-splicing fa	5	14	14	13	13	14	14	13	13	14	13	14	14	13	13	14	12	13	13	12	12	13	42	42	36.1	27.366	238	238;137;235;51;110	0	322.83	By MS/MS	By MS/MS	By MS/MS	By MS/MS	By MS/MS	By MS/MS	38.2	42	42	38.2	38.7	42
Q5T3I0;A0A0A0MRK1;E9PAV9;F8W895;E9PPY4;F2Z3C6	Q5T3I0;A0A0A0MRK1;E9PAV9;F8W895	13;12;11;7;6;6	13;12;11;7;6;6	13;12;11;7;6;6	G patch domain-containing protein 4	GPATCH4	sp|Q5T3I0|GPTC4_HUMAN G patch domain-containing protein 4 OS=Homo sapiens GN=GPATCH4 PE=1 SV=2;tr|A0A0A0MRK1|A0A0A0MRK1_HUMAN G patch domain-containing protein 4 OS=Homo sapiens GN=GPATCH4 PE=1 SV=1;tr|E9PAV9|E9PAV9_HUMAN G patch domain-containing protein	6	13	13	13	10	10	13	12	12	13	10	10	13	12	12	13	10	10	13	12	12	13	32.1	32.1	32.1	50.381	446	446;370;375;264;119;143	0	118.85	By MS/MS	By MS/MS	By MS/MS	By MS/MS	By MS/MS	By MS/MS	26.7	27.8	32.1	30.3	30.3	32.1
Q96IZ7;H7C5Q0;C9J713;C9J367;C9JVB3	Q96IZ7;H7C5Q0;C9J713	13;11;8;2;1	13;11;8;2;1	13;11;8;2;1	Serine/Arginine-related protein 53	RSRC1	sp|Q96IZ7|RSRC1_HUMAN Serine/Arginine-related protein 53 OS=Homo sapiens GN=RSRC1 PE=1 SV=1;tr|H7C5Q0|H7C5Q0_HUMAN Serine/Arginine-related protein 53 (Fragment) OS=Homo sapiens GN=RSRC1 PE=1 SV=1;tr|C9J713|C9J713_HUMAN Serine/Arginine-related protein 53 OS	5	13	13	13	13	13	13	13	13	12	13	13	13	13	13	12	13	13	13	13	13	12	33.2	33.2	33.2	38.677	334	334;208;283;203;194	0	118.29	By MS/MS	By MS/MS	By MS/MS	By MS/MS	By MS/MS	By MS/MS	33.2	33.2	33.2	33.2	33.2	33.2
Q9BQ39;A0A087WVC1	Q9BQ39;A0A087WVC1	14;13	14;13	13;12	ATP-dependent RNA helicase DDX50	DDX50	sp|Q9BQ39|DDX50_HUMAN ATP-dependent RNA helicase DDX50 OS=Homo sapiens GN=DDX50 PE=1 SV=1;tr|A0A087WVC1|A0A087WVC1_HUMAN ATP-dependent RNA helicase DDX50 OS=Homo sapiens GN=DDX50 PE=1 SV=1	2	14	14	13	13	12	13	10	9	9	13	12	13	10	9	9	12	11	12	9	8	9	21.8	21.8	19.8	82.564	737	737;730	0	87.871	By MS/MS	By MS/MS	By MS/MS	By MS/MS	By MS/MS	By MS/MS	20.2	18.9	20.1	15.7	15.2	14.7
Q9P258	Q9P258	13	13	13	Protein RCC2	RCC2	sp|Q9P258|RCC2_HUMAN Protein RCC2 OS=Homo sapiens GN=RCC2 PE=1 SV=2	1	13	13	13	8	9	10	11	12	8	8	9	10	11	12	8	8	9	10	11	12	8	34.1	34.1	34.1	56.084	522	522	0	102.87	By MS/MS	By MS/MS	By MS/MS	By MS/MS	By MS/MS	By MS/MS	24.9	23.9	27.2	29.3	30.8	22
Q9UNE7;H3BTA3;H3BUD0;H3BS86	Q9UNE7;H3BTA3	13;7;6;5	13;7;6;5	13;7;6;5	E3 ubiquitin-protein ligase CHIP	STUB1	sp|Q9UNE7|CHIP_HUMAN E3 ubiquitin-protein ligase CHIP OS=Homo sapiens GN=STUB1 PE=1 SV=2;tr|H3BTA3|H3BTA3_HUMAN E3 ubiquitin-protein ligase CHIP (Fragment) OS=Homo sapiens GN=STUB1 PE=1 SV=1	4	13	13	13	12	13	13	13	13	12	12	13	13	13	13	12	12	13	13	13	13	12	38.9	38.9	38.9	34.856	303	303;157;185;214	0	94.575	By MS/MS	By MS/MS	By MS/MS	By MS/MS	By MS/MS	By MS/MS	36.3	38.9	38.9	38.9	38.9	34
CON__P35527;P35527;K7EQQ3	CON__P35527;P35527	12;12;4	12;12;4	12;12;4	Keratin, type I cytoskeletal 9	KRT9	;sp|P35527|K1C9_HUMAN Keratin, type I cytoskeletal 9 OS=Homo sapiens GN=KRT9 PE=1 SV=3	3	12	12	12	7	7	8	11	10	8	7	7	8	11	10	8	7	7	8	11	10	8	24.9	24.9	24.9	62.129	623	623;623;390	0	81.529	By MS/MS	By MS/MS	By MS/MS	By MS/MS	By MS/MS	By MS/MS	16.1	15.6	17.3	23.1	21.5	16.7
J3QQ67;Q07020;G3V203;H0YHA7;F8VYV2;A0A075B7A0;F8VUA6;F8VXR6	J3QQ67;Q07020;G3V203;H0YHA7;F8VYV2;A0A075B7A0;F8VUA6	12;12;11;10;9;8;7;1	12;12;11;10;9;8;7;1	12;12;11;10;9;8;7;1	60S ribosomal protein L18	RPL18	tr|J3QQ67|J3QQ67_HUMAN 60S ribosomal protein L18 (Fragment) OS=Homo sapiens GN=RPL18 PE=1 SV=1;sp|Q07020|RL18_HUMAN 60S ribosomal protein L18 OS=Homo sapiens GN=RPL18 PE=1 SV=2;tr|G3V203|G3V203_HUMAN 60S ribosomal protein L18 OS=Homo sapiens GN=RPL18 PE=1	8	12	12	12	10	11	11	12	12	12	10	11	11	12	12	12	10	11	11	12	12	12	51.1	51.1	51.1	21.728	190	190;188;164;167;133;138;130;84	0	249.81	By MS/MS	By MS/MS	By MS/MS	By MS/MS	By MS/MS	By MS/MS	51.1	51.1	51.1	51.1	51.1	51.1
O15047;C9J2Z9	O15047	12;1	12;1	12;1	Histone-lysine N-methyltransferase SETD1A	SETD1A	sp|O15047|SET1A_HUMAN Histone-lysine N-methyltransferase SETD1A OS=Homo sapiens GN=SETD1A PE=1 SV=3	2	12	12	12	9	11	12	10	10	9	9	11	12	10	10	9	9	11	12	10	10	9	9.4	9.4	9.4	186.03	1707	1707;247	0	83.413	By MS/MS	By MS/MS	By MS/MS	By MS/MS	By MS/MS	By MS/MS	7.1	8.7	9.4	8.5	8.5	7
P05023;M0R116;B1AKY9;A0A0A0MT26;P13637;P50993;Q5TC02;Q5TC01;H0Y7C1;M0QXF2;P20648	P05023	12;3;3;3;3;3;2;2;2;1;1	12;3;3;3;3;3;2;2;2;1;1	12;3;3;3;3;3;2;2;2;1;1	Sodium/potassium-transporting ATPase subunit alpha-1	ATP1A1	sp|P05023|AT1A1_HUMAN Sodium/potassium-transporting ATPase subunit alpha-1 OS=Homo sapiens GN=ATP1A1 PE=1 SV=1	11	12	12	12	9	7	7	12	12	12	9	7	7	12	12	12	9	7	7	12	12	12	12.6	12.6	12.6	112.89	1023	1023;983;1009;1226;1013;1020;106;144;714;251;1035	0	78.854	By MS/MS	By MS/MS	By MS/MS	By MS/MS	By MS/MS	By MS/MS	9.9	8.7	8.6	12.6	12.6	12.6
P07195;A8MW50;F5H793;C9J7H8;F5H5G7;F5H155;G3XAP5;F5H245;P07864	P07195;A8MW50	13;9;6;6;1;1;1;1;1	13;9;6;6;1;1;1;1;1	12;8;6;6;0;0;0;0;0	L-lactate dehydrogenase B chain;L-lactate dehydrogenase	LDHB	sp|P07195|LDHB_HUMAN L-lactate dehydrogenase B chain OS=Homo sapiens GN=LDHB PE=1 SV=2;tr|A8MW50|A8MW50_HUMAN L-lactate dehydrogenase (Fragment) OS=Homo sapiens GN=LDHB PE=1 SV=1	9	13	13	12	8	9	11	13	13	13	8	9	11	13	13	13	7	8	10	12	12	12	36.8	36.8	36.8	36.638	334	334;232;102;137;183;225;241;318;332	0	134.75	By MS/MS	By MS/MS	By MS/MS	By MS/MS	By MS/MS	By MS/MS	24.3	26.6	36.2	36.8	36.8	36.8
P08238;Q58FF7;F8W026;Q96GW1	P08238	23;7;1;1	23;7;1;1	12;4;0;0	Heat shock protein HSP 90-beta	HSP90AB1	sp|P08238|HS90B_HUMAN Heat shock protein HSP 90-beta OS=Homo sapiens GN=HSP90AB1 PE=1 SV=4	4	23	23	12	22	20	22	23	23	20	22	20	22	23	23	20	12	10	12	12	12	10	33.8	33.8	16.9	83.263	724	724;597;49;315	0	217.63	By MS/MS	By MS/MS	By MS/MS	By MS/MS	By MS/MS	By MS/MS	32.9	29.7	31.9	33.8	33.8	30.5
P39019;M0R2L9;M0QXK4;M0QYF7;M0R140;A0A075B6E2	P39019;M0R2L9;M0QXK4;M0QYF7;M0R140	12;7;7;7;7;5	12;7;7;7;7;5	12;7;7;7;7;5	40S ribosomal protein S19	RPS19	sp|P39019|RS19_HUMAN 40S ribosomal protein S19 OS=Homo sapiens GN=RPS19 PE=1 SV=2;tr|M0R2L9|M0R2L9_HUMAN 40S ribosomal protein S19 (Fragment) OS=Homo sapiens GN=RPS19 PE=1 SV=1;tr|M0QXK4|M0QXK4_HUMAN 40S ribosomal protein S19 (Fragment) OS=Homo sapiens GN=	6	12	12	12	6	8	10	12	12	10	6	8	10	12	12	10	6	8	10	12	12	10	53.8	53.8	53.8	16.06	145	145;71;76;100;102;71	0	110.94	By MS/MS	By MS/MS	By MS/MS	By MS/MS	By MS/MS	By MS/MS	36.6	38.6	51.7	53.8	53.8	51.7
P46777;Q5T7N0	P46777	12;5	12;5	12;5	60S ribosomal protein L5	RPL5	sp|P46777|RL5_HUMAN 60S ribosomal protein L5 OS=Homo sapiens GN=RPL5 PE=1 SV=3	2	12	12	12	8	7	8	11	10	11	8	7	8	11	10	11	8	7	8	11	10	11	39.7	39.7	39.7	34.362	297	297;130	0	98.508	By MS/MS	By MS/MS	By MS/MS	By MS/MS	By MS/MS	By MS/MS	35.4	33	35.4	39.7	39.4	35.7
P47914	P47914	12	12	12	60S ribosomal protein L29	RPL29	sp|P47914|RL29_HUMAN 60S ribosomal protein L29 OS=Homo sapiens GN=RPL29 PE=1 SV=2	1	12	12	12	11	12	12	11	10	11	11	12	12	11	10	11	11	12	12	11	10	11	42.8	42.8	42.8	17.752	159	159	0	99.364	By MS/MS	By MS/MS	By MS/MS	By MS/MS	By MS/MS	By MS/MS	40.3	42.8	42.8	40.3	37.7	40.3
P49368;B4DUR8;E9PRC8;Q5SZX9;Q5SZX6;E9PM09;E9PQ35	P49368;B4DUR8	12;10;5;3;3;2;1	12;10;5;3;3;2;1	12;10;5;3;3;2;1	T-complex protein 1 subunit gamma	CCT3	sp|P49368|TCPG_HUMAN T-complex protein 1 subunit gamma OS=Homo sapiens GN=CCT3 PE=1 SV=4;tr|B4DUR8|B4DUR8_HUMAN T-complex protein 1 subunit gamma OS=Homo sapiens GN=CCT3 PE=1 SV=1	7	12	12	12	11	9	9	10	12	10	11	9	9	10	12	10	11	9	9	10	12	10	23.7	23.7	23.7	60.533	545	545;500;234;161;276;154;144	0	95.154	By MS/MS	By MS/MS	By MS/MS	By MS/MS	By MS/MS	By MS/MS	21.7	17.2	18.3	21.3	23.7	21.5
P62269;J3JS69;A0A0G2JQH2;Q5GGW2	P62269	12;5;4;4	12;5;4;4	12;5;4;4	40S ribosomal protein S18	RPS18	sp|P62269|RS18_HUMAN 40S ribosomal protein S18 OS=Homo sapiens GN=RPS18 PE=1 SV=3	4	12	12	12	10	9	11	11	12	9	10	9	11	11	12	9	10	9	11	11	12	9	48.7	48.7	48.7	17.718	152	152;82;33;34	0	128.39	By MS/MS	By MS/MS	By MS/MS	By MS/MS	By MS/MS	By MS/MS	45.4	48.7	48.7	48.7	48.7	48
P62917;E9PKZ0;E9PKU4;G3V1A1;E9PP36	P62917;E9PKZ0;E9PKU4;G3V1A1;E9PP36	12;10;10;8;6	12;10;10;8;6	12;10;10;8;6	60S ribosomal protein L8	RPL8	sp|P62917|RL8_HUMAN 60S ribosomal protein L8 OS=Homo sapiens GN=RPL8 PE=1 SV=2;tr|E9PKZ0|E9PKZ0_HUMAN 60S ribosomal protein L8 (Fragment) OS=Homo sapiens GN=RPL8 PE=1 SV=1;tr|E9PKU4|E9PKU4_HUMAN 60S ribosomal protein L8 (Fragment) OS=Homo sapiens GN=RPL8 P	5	12	12	12	6	9	12	12	12	12	6	9	12	12	12	12	6	9	12	12	12	12	41.2	41.2	41.2	28.024	257	257;205;235;167;148	0	148.51	By MS/MS	By MS/MS	By MS/MS	By MS/MS	By MS/MS	By MS/MS	26.8	37.4	41.2	41.2	41.2	41.2
P62937;F8WE65;C9J5S7;P0DN26;A0A0H2UH34;A0A0B4J2A2;A0A075B767;A0A075B759;Q9Y536;F5H284;P0DN37	P62937;F8WE65;C9J5S7	12;7;7;2;2;2;2;2;2;2;1	12;7;7;2;2;2;2;2;2;2;1	12;7;7;2;2;2;2;2;2;2;1	Peptidyl-prolyl cis-trans isomerase A;Peptidyl-prolyl cis-trans isomerase A, N-terminally processed;Peptidyl-prolyl cis-trans isomerase	PPIA	sp|P62937|PPIA_HUMAN Peptidyl-prolyl cis-trans isomerase A OS=Homo sapiens GN=PPIA PE=1 SV=2;tr|F8WE65|F8WE65_HUMAN Peptidyl-prolyl cis-trans isomerase OS=Homo sapiens GN=PPIA PE=1 SV=1;tr|C9J5S7|C9J5S7_HUMAN Peptidyl-prolyl cis-trans isomerase OS=Homo sap	11	12	12	12	10	11	11	12	12	12	10	11	11	12	12	12	10	11	11	12	12	12	70.9	70.9	70.9	18.012	165	165;120;121;164;164;164;164;164;164;164;164	0	91.832	By MS/MS	By MS/MS	By MS/MS	By MS/MS	By MS/MS	By MS/MS	70.9	70.9	70.9	70.9	70.9	70.9
P83731;C9JXB8;C9JNW5	P83731;C9JXB8;C9JNW5	12;10;10	12;10;10	12;10;10	60S ribosomal protein L24	RPL24	sp|P83731|RL24_HUMAN 60S ribosomal protein L24 OS=Homo sapiens GN=RPL24 PE=1 SV=1;tr|C9JXB8|C9JXB8_HUMAN 60S ribosomal protein L24 OS=Homo sapiens GN=RPL24 PE=1 SV=1;tr|C9JNW5|C9JNW5_HUMAN 60S ribosomal protein L24 OS=Homo sapiens GN=RPL24 PE=1 SV=1	3	12	12	12	11	12	12	11	12	11	11	12	12	11	12	11	11	12	12	11	12	11	58.6	58.6	58.6	17.779	157	157;121;150	0	91.28	By MS/MS	By MS/MS	By MS/MS	By MS/MS	By MS/MS	By MS/MS	58.6	58.6	58.6	56.7	58.6	56.7
Q13243;B4DJK0;B4DUA4;G3V5K8	Q13243;B4DJK0;B4DUA4;G3V5K8	13;9;9;7	12;8;8;7	12;8;8;7	Serine/arginine-rich splicing factor 5	SRSF5	sp|Q13243|SRSF5_HUMAN Serine/arginine-rich splicing factor 5 OS=Homo sapiens GN=SRSF5 PE=1 SV=1;tr|B4DJK0|B4DJK0_HUMAN Serine/arginine-rich-splicing factor 5 OS=Homo sapiens GN=SRSF5 PE=1 SV=1;tr|B4DUA4|B4DUA4_HUMAN Serine/arginine-rich-splicing factor 5 O	4	13	12	12	11	12	12	11	11	10	10	11	11	10	10	9	10	11	11	10	10	9	38.2	38.2	38.2	31.263	272	272;124;138;99	0	84.889	By MS/MS	By MS/MS	By MS/MS	By MS/MS	By MS/MS	By MS/MS	32	36	35.7	32	32	31.6
Q7L4I2;H0YGP9;E1B6W4;E9PI52	Q7L4I2	12;2;2;1	12;2;2;1	12;2;2;1	Arginine/serine-rich coiled-coil protein 2	RSRC2	sp|Q7L4I2|RSRC2_HUMAN Arginine/serine-rich coiled-coil protein 2 OS=Homo sapiens GN=RSRC2 PE=1 SV=1	4	12	12	12	12	11	11	10	11	11	12	11	11	10	11	11	12	11	11	10	11	11	24.9	24.9	24.9	50.559	434	434;176;236;76	0	102.56	By MS/MS	By MS/MS	By MS/MS	By MS/MS	By MS/MS	By MS/MS	24.9	24.4	24.4	24.4	24.4	24.4
Q7Z6E9;H3BSK8;H3BUN0;I3L3Y2	Q7Z6E9;H3BSK8	12;6;4;3	12;6;4;3	12;6;4;3	E3 ubiquitin-protein ligase RBBP6	RBBP6	sp|Q7Z6E9|RBBP6_HUMAN E3 ubiquitin-protein ligase RBBP6 OS=Homo sapiens GN=RBBP6 PE=1 SV=1;tr|H3BSK8|H3BSK8_HUMAN E3 ubiquitin-protein ligase RBBP6 (Fragment) OS=Homo sapiens GN=RBBP6 PE=1 SV=1	4	12	12	12	11	10	11	11	10	8	11	10	11	11	10	8	11	10	11	11	10	8	9.5	9.5	9.5	201.56	1792	1792;1008;300;158	0	86.406	By MS/MS	By MS/MS	By MS/MS	By MS/MS	By MS/MS	By MS/MS	8.5	7.8	8.7	8.5	7.7	6.2
Q8NC51	Q8NC51	12	12	12	Plasminogen activator inhibitor 1 RNA-binding protein	SERBP1	sp|Q8NC51|PAIRB_HUMAN Plasminogen activator inhibitor 1 RNA-binding protein OS=Homo sapiens GN=SERBP1 PE=1 SV=2	1	12	12	12	8	10	10	11	12	10	8	10	10	11	12	10	8	10	10	11	12	10	30.1	30.1	30.1	44.965	408	408	0	88.318	By MS/MS	By MS/MS	By MS/MS	By MS/MS	By MS/MS	By MS/MS	18.1	23.5	23.5	26.7	30.1	23.5
Q9NQ29;A8MYV2;B8ZZ10;B8ZZ09;B8ZZ12;F8WBC1;F2Z322	Q9NQ29;A8MYV2;B8ZZ10	23;19;15;7;4;2;2	13;10;7;5;3;1;1	12;9;6;4;3;1;1	Putative RNA-binding protein Luc7-like 1	LUC7L	sp|Q9NQ29|LUC7L_HUMAN Putative RNA-binding protein Luc7-like 1 OS=Homo sapiens GN=LUC7L PE=1 SV=1;tr|A8MYV2|A8MYV2_HUMAN LUC7-like (S. cerevisiae) OS=Homo sapiens GN=LUC7L PE=1 SV=1;tr|B8ZZ10|B8ZZ10_HUMAN LUC7-like (S. cerevisiae) (Fragment) OS=Homo sapien	7	23	13	12	23	23	23	22	22	21	13	13	13	12	12	11	12	12	12	11	11	10	43.7	33.4	31.5	43.727	371	371;272;182;84;32;42;55	0	225.19	By MS/MS	By MS/MS	By MS/MS	By MS/MS	By MS/MS	By MS/MS	43.7	43.7	43.7	43.7	43.7	42.9
Q9UQ80;F8VR77;H0YIN7;F8W0A3;F8VZ69	Q9UQ80;F8VR77	12;6;3;3;1	12;6;3;3;1	12;6;3;3;1	Proliferation-associated protein 2G4	PA2G4	sp|Q9UQ80|PA2G4_HUMAN Proliferation-associated protein 2G4 OS=Homo sapiens GN=PA2G4 PE=1 SV=3;tr|F8VR77|F8VR77_HUMAN Proliferation-associated protein 2G4 OS=Homo sapiens GN=PA2G4 PE=1 SV=1	5	12	12	12	5	2	7	12	12	10	5	2	7	12	12	10	5	2	7	12	12	10	34	34	34	43.786	394	394;284;160;187;65	0	83.966	By MS/MS	By matching	By MS/MS	By MS/MS	By MS/MS	By MS/MS	13.5	5.1	18.3	34	34	28.4
Q9Y5K6	Q9Y5K6	12	12	12	CD2-associated protein	CD2AP	sp|Q9Y5K6|CD2AP_HUMAN CD2-associated protein OS=Homo sapiens GN=CD2AP PE=1 SV=1	1	12	12	12	9	11	10	12	10	10	9	11	10	12	10	10	9	11	10	12	10	10	21	21	21	71.45	639	639	0	72.828	By MS/MS	By MS/MS	By MS/MS	By MS/MS	By MS/MS	By MS/MS	17.5	19.4	19.1	21	19.1	18
G3V576;G3V4W0;B4DY08;B2R5W2;G3V4C1;G3V2Q1;P07910;G3V555;G3V575;G3V5X6;G3V3K6;G3V251;B4DSU6;G3V4M8;G3V2H6;A0A0G2JPF8;A0A0G2JNQ3;P0DMR1;O60812;B7ZW38;B2RXH8;G3V5V7;G3V2D6	G3V576;G3V4W0;B4DY08;B2R5W2;G3V4C1;G3V2Q1;P07910;G3V555;G3V575;G3V5X6;G3V3K6;G3V251;B4DSU6;G3V4M8	11;11;11;11;11;11;11;9;9;8;8;8;8;7;5;5;5;5;5;5;5;3;3	11;11;11;11;11;11;11;9;9;8;8;8;8;7;5;5;5;5;5;5;5;3;3	11;11;11;11;11;11;11;9;9;8;8;8;8;7;5;5;5;5;5;5;5;3;3	Heterogeneous nuclear ribonucleoproteins C1/C2	HNRNPC	tr|G3V576|G3V576_HUMAN Heterogeneous nuclear ribonucleoproteins C1/C2 OS=Homo sapiens GN=HNRNPC PE=1 SV=1;tr|G3V4W0|G3V4W0_HUMAN Heterogeneous nuclear ribonucleoproteins C1/C2 (Fragment) OS=Homo sapiens GN=HNRNPC PE=1 SV=1;tr|B4DY08|B4DY08_HUMAN Heterogene	23	11	11	11	4	4	5	10	11	9	4	4	5	10	11	9	4	4	5	10	11	9	46.3	46.3	46.3	25.256	231	231;262;288;290;292;305;306;175;187;117;121;126;147;66;54;293;293;293;293;293;293;180;214	0	89.922	By MS/MS	By MS/MS	By MS/MS	By MS/MS	By MS/MS	By MS/MS	21.6	18.6	19	39.4	46.3	39.4
F8W6I7;P09651;F8W646;F8VZ49;F8VTQ5;H0YH80;Q32P51;F8VYN5	F8W6I7;P09651;F8W646;F8VZ49	11;11;7;7;4;4;4;3	11;11;7;7;4;4;4;3	11;11;7;7;4;4;4;3	Heterogeneous nuclear ribonucleoprotein A1;Heterogeneous nuclear ribonucleoprotein A1, N-terminally processed	HNRNPA1	tr|F8W6I7|F8W6I7_HUMAN Heterogeneous nuclear ribonucleoprotein A1 OS=Homo sapiens GN=HNRNPA1 PE=1 SV=2;sp|P09651|ROA1_HUMAN Heterogeneous nuclear ribonucleoprotein A1 OS=Homo sapiens GN=HNRNPA1 PE=1 SV=5;tr|F8W646|F8W646_HUMAN Heterogeneous nuclear ribonuc	8	11	11	11	9	10	7	10	9	9	9	10	7	10	9	9	9	10	7	10	9	9	44	44	44	33.155	307	307;372;156;231;145;191;320;113	0	70.298	By MS/MS	By matching	By MS/MS	By MS/MS	By MS/MS	By MS/MS	39.7	42	33.2	39.1	37.1	39.1
P12277;G3V4N7;H0YJG0;H0YJK0;G3V461;G3V2I1	P12277;G3V4N7	11;6;4;2;2;1	11;6;4;2;2;1	11;6;4;2;2;1	Creatine kinase B-type	CKB	sp|P12277|KCRB_HUMAN Creatine kinase B-type OS=Homo sapiens GN=CKB PE=1 SV=1;tr|G3V4N7|G3V4N7_HUMAN Creatine kinase B-type (Fragment) OS=Homo sapiens GN=CKB PE=1 SV=1	6	11	11	11	8	9	8	10	9	11	8	9	8	10	9	11	8	9	8	10	9	11	39.4	39.4	39.4	42.644	381	381;217;179;90;128;58	0	84.486	By MS/MS	By MS/MS	By MS/MS	By MS/MS	By MS/MS	By MS/MS	29.9	30.4	26.2	32.3	30.4	39.4
P18669;P15259;Q8N0Y7	P18669	11;5;5	11;5;5	11;5;5	Phosphoglycerate mutase 1	PGAM1	sp|P18669|PGAM1_HUMAN Phosphoglycerate mutase 1 OS=Homo sapiens GN=PGAM1 PE=1 SV=2	3	11	11	11	6	8	7	10	9	8	6	8	7	10	9	8	6	8	7	10	9	8	50	50	50	28.804	254	254;253;254	0	135.97	By MS/MS	By MS/MS	By MS/MS	By MS/MS	By MS/MS	By MS/MS	35.4	42.1	35.8	46.5	46.1	43.3
P25705;K7EK77;K7ERX7;K7ENJ4;K7EJP1;K7EQH4;K7ESA0	P25705;K7EK77;K7ERX7;K7ENJ4	11;8;7;6;5;3;1	11;8;7;6;5;3;1	11;8;7;6;5;3;1	ATP synthase subunit alpha, mitochondrial	ATP5A1	sp|P25705|ATPA_HUMAN ATP synthase subunit alpha, mitochondrial OS=Homo sapiens GN=ATP5A1 PE=1 SV=1;tr|K7EK77|K7EK77_HUMAN ATP synthase subunit alpha, mitochondrial (Fragment) OS=Homo sapiens GN=ATP5A1 PE=1 SV=1;tr|K7ERX7|K7ERX7_HUMAN ATP synthase subunit a	7	11	11	11	3	5	7	10	11	10	3	5	7	10	11	10	3	5	7	10	11	10	21.5	21.5	21.5	59.75	553	553;207;205;199;145;111;77	0	86.183	By matching	By matching	By MS/MS	By MS/MS	By MS/MS	By MS/MS	7.4	12.1	13.6	19.7	21.5	19.7
P50990;H7C4C8	P50990;H7C4C8	11;7	11;7	11;7	T-complex protein 1 subunit theta	CCT8	sp|P50990|TCPQ_HUMAN T-complex protein 1 subunit theta OS=Homo sapiens GN=CCT8 PE=1 SV=4;tr|H7C4C8|H7C4C8_HUMAN T-complex protein 1 subunit theta (Fragment) OS=Homo sapiens GN=CCT8 PE=1 SV=1	2	11	11	11	6	5	5	9	9	4	6	5	5	9	9	4	6	5	5	9	9	4	23	23	23	59.62	548	548;323	0	70.259	By MS/MS	By matching	By MS/MS	By MS/MS	By MS/MS	By MS/MS	12	10.4	9.9	19.5	17.9	8.4
P62277;J3KMX5;E9PS50	P62277;J3KMX5	11;8;4	11;8;4	11;8;4	40S ribosomal protein S13	RPS13	sp|P62277|RS13_HUMAN 40S ribosomal protein S13 OS=Homo sapiens GN=RPS13 PE=1 SV=2;tr|J3KMX5|J3KMX5_HUMAN 40S ribosomal protein S13 OS=Homo sapiens GN=RPS13 PE=1 SV=1	3	11	11	11	10	9	9	11	11	10	10	9	9	11	11	10	10	9	9	11	11	10	50.3	50.3	50.3	17.222	151	151;148;116	0	86.361	By matching	By MS/MS	By MS/MS	By MS/MS	By MS/MS	By MS/MS	49	49	49	50.3	50.3	43
Q5T760;Q05519;Q5T757;B4DWT1;S4R3C4	Q5T760;Q05519;Q5T757	11;11;7;3;1	11;11;7;3;1	11;11;7;3;1	Serine/arginine-rich splicing factor 11	SRSF11	tr|Q5T760|Q5T760_HUMAN Serine/arginine-rich-splicing factor 11 (Fragment) OS=Homo sapiens GN=SRSF11 PE=1 SV=1;sp|Q05519|SRS11_HUMAN Serine/arginine-rich splicing factor 11 OS=Homo sapiens GN=SRSF11 PE=1 SV=1;tr|Q5T757|Q5T757_HUMAN Serine/arginine-rich-spli	5	11	11	11	11	10	10	11	10	9	11	10	10	11	10	9	11	10	10	11	10	9	28.5	28.5	28.5	42.316	389	389;484;424;128;80	0	180.59	By MS/MS	By MS/MS	By MS/MS	By MS/MS	By MS/MS	By MS/MS	28.5	28.5	28.5	28.5	28.5	28.3
Q13435;A0A087WZZ5;E9PPJ0;E9PJT3;E9PJ04;H0YCG1;H0YEX5;E9PIL8	Q13435;A0A087WZZ5;E9PPJ0;E9PJT3;E9PJ04	11;10;10;6;6;5;3;1	11;10;10;6;6;5;3;1	11;10;10;6;6;5;3;1	Splicing factor 3B subunit 2	SF3B2	sp|Q13435|SF3B2_HUMAN Splicing factor 3B subunit 2 OS=Homo sapiens GN=SF3B2 PE=1 SV=2;tr|A0A087WZZ5|A0A087WZZ5_HUMAN Splicing factor 3B subunit 2 OS=Homo sapiens GN=SF3B2 PE=1 SV=1;tr|E9PPJ0|E9PPJ0_HUMAN Splicing factor 3B subunit 2 OS=Homo sapiens GN=SF3B	8	11	11	11	5	4	7	10	11	10	5	4	7	10	11	10	5	4	7	10	11	10	18.5	18.5	18.5	100.23	895	895;871;878;273;354;387;315;81	0	72.528	By MS/MS	By matching	By MS/MS	By MS/MS	By MS/MS	By MS/MS	5.9	4.6	10.9	17.5	18.5	16.2
Q5JXI8;Q13642;Q5JXH8;Q5JXH7;Q5JXI3;A0A0D9SFZ9;Q5JXI2;A0A0D9SFI6;A0A0D9SFB0;Q5JXH9;A0A0D9SGB2;Q5JXI0;A0A0D9SG53;A0A0D9SGD1;A0A0D9SEY7	Q5JXI8;Q13642;Q5JXH8;Q5JXH7;Q5JXI3;A0A0D9SFZ9;Q5JXI2;A0A0D9SFI6;A0A0D9SFB0;Q5JXH9;A0A0D9SGB2;Q5JXI0	11;10;9;9;9;8;8;7;7;7;6;6;5;2;1	11;10;9;9;9;8;8;7;7;7;6;6;5;2;1	11;10;9;9;9;8;8;7;7;7;6;6;5;2;1	Four and a half LIM domains protein 1	FHL1	tr|Q5JXI8|Q5JXI8_HUMAN Four and a half LIM domains protein 1 (Fragment) OS=Homo sapiens GN=FHL1 PE=1 SV=1;sp|Q13642|FHL1_HUMAN Four and a half LIM domains protein 1 OS=Homo sapiens GN=FHL1 PE=1 SV=4;tr|Q5JXH8|Q5JXH8_HUMAN Four and a half LIM domains protei	15	11	11	11	7	11	11	11	11	11	7	11	11	11	11	11	7	11	11	11	11	11	56.8	56.8	56.8	29.16	257	257;323;204;205;207;175;210;147;152;155;138;141;130;78;66	0	89.402	By MS/MS	By MS/MS	By MS/MS	By MS/MS	By MS/MS	By MS/MS	32.3	56.8	56.8	56.8	56.8	56.8
Q86UK7;H3BQQ2	Q86UK7;H3BQQ2	11;9	11;9	11;9	Zinc finger protein 598	ZNF598	sp|Q86UK7|ZN598_HUMAN Zinc finger protein 598 OS=Homo sapiens GN=ZNF598 PE=1 SV=1;tr|H3BQQ2|H3BQQ2_HUMAN Zinc finger protein 598 OS=Homo sapiens GN=ZNF598 PE=1 SV=1	2	11	11	11	8	10	11	11	11	11	8	10	11	11	11	11	8	10	11	11	11	11	16.5	16.5	16.5	98.636	904	904;849	0	78.326	By MS/MS	By MS/MS	By MS/MS	By MS/MS	By MS/MS	By MS/MS	10.8	15.5	16.5	16.5	16.5	16.5
Q9HC38;F6TLX2;I3L3Q4;I3NI27;I3NI24;I3L2C2;I3L1F4;I3L277;I3L1I0	Q9HC38;F6TLX2;I3L3Q4	11;10;9;1;1;1;1;1;1	11;10;9;1;1;1;1;1;1	11;10;9;1;1;1;1;1;1	Glyoxalase domain-containing protein 4	GLOD4	sp|Q9HC38|GLOD4_HUMAN Glyoxalase domain-containing protein 4 OS=Homo sapiens GN=GLOD4 PE=1 SV=1;tr|F6TLX2|F6TLX2_HUMAN Glyoxalase domain-containing protein 4 OS=Homo sapiens GN=GLOD4 PE=1 SV=1;tr|I3L3Q4|I3L3Q4_HUMAN Glyoxalase domain-containing protein 4 (	9	11	11	11	9	10	9	9	10	10	9	10	9	9	10	10	9	10	9	9	10	10	31.6	31.6	31.6	34.793	313	313;502;227;36;36;52;59;76;115	0	76.548	By MS/MS	By MS/MS	By MS/MS	By MS/MS	By MS/MS	By MS/MS	25.9	28.4	25.9	29.1	29.1	29.1
Q9NZI8	Q9NZI8	12	12	11	Insulin-like growth factor 2 mRNA-binding protein 1	IGF2BP1	sp|Q9NZI8|IF2B1_HUMAN Insulin-like growth factor 2 mRNA-binding protein 1 OS=Homo sapiens GN=IGF2BP1 PE=1 SV=2	1	12	12	11	8	6	11	12	12	11	8	6	11	12	12	11	7	5	10	11	11	10	29.5	29.5	27.2	63.48	577	577	0	85.687	By MS/MS	By MS/MS	By MS/MS	By MS/MS	By MS/MS	By MS/MS	19.6	14.4	26.3	29.5	29.5	28.1
A0A087WU44;Q3L8U1	A0A087WU44;Q3L8U1	10;10	10;10	10;10	Chromodomain-helicase-DNA-binding protein 9	CHD9	tr|A0A087WU44|A0A087WU44_HUMAN Chromodomain-helicase-DNA-binding protein 9 OS=Homo sapiens GN=CHD9 PE=1 SV=1;sp|Q3L8U1|CHD9_HUMAN Chromodomain-helicase-DNA-binding protein 9 OS=Homo sapiens GN=CHD9 PE=1 SV=2	2	10	10	10	10	8	10	8	9	7	10	8	10	8	9	7	10	8	10	8	9	7	11.6	11.6	11.6	105.94	963	963;2897	0	70.254	By MS/MS	By MS/MS	By MS/MS	By MS/MS	By MS/MS	By MS/MS	11.6	9.4	11.6	11	11.6	11
K7EQ48;A0A0A0MTS2;P06744;A0A0J9YXP8;A0A0J9YX90;A0A0J9YYH3;K7EPY4;K7EP41;K7ELR7;K7ENA0;K7ERK8;K7ERC6;CON__Q3ZBD7;K7EIL4;K7ESF4	K7EQ48;A0A0A0MTS2;P06744;A0A0J9YXP8;A0A0J9YX90;A0A0J9YYH3;K7EPY4;K7EP41	10;10;10;8;8;8;6;5;4;3;2;2;2;1;1	10;10;10;8;8;8;6;5;4;3;2;2;2;1;1	10;10;10;8;8;8;6;5;4;3;2;2;2;1;1	Glucose-6-phosphate isomerase	GPI	tr|K7EQ48|K7EQ48_HUMAN Glucose-6-phosphate isomerase OS=Homo sapiens GN=GPI PE=1 SV=2;tr|A0A0A0MTS2|A0A0A0MTS2_HUMAN Glucose-6-phosphate isomerase (Fragment) OS=Homo sapiens GN=GPI PE=1 SV=1;sp|P06744|G6PI_HUMAN Glucose-6-phosphate isomerase OS=Homo sapien	15	10	10	10	5	4	5	10	10	8	5	4	5	10	10	8	5	4	5	10	10	8	27.4	27.4	27.4	53.401	474	474;573;558;268;279;283;167;159;146;163;133;162;557;110;209	0	76.153	By MS/MS	By matching	By MS/MS	By MS/MS	By MS/MS	By MS/MS	15.4	6.5	9.7	27.4	27.4	22.4
A0A0C4DGV5;O95218	A0A0C4DGV5;O95218	10;10	10;10	10;10	Zinc finger Ran-binding domain-containing protein 2	ZRANB2	tr|A0A0C4DGV5|A0A0C4DGV5_HUMAN Zinc finger Ran-binding domain-containing protein 2 OS=Homo sapiens GN=ZRANB2 PE=1 SV=1;sp|O95218|ZRAB2_HUMAN Zinc finger Ran-binding domain-containing protein 2 OS=Homo sapiens GN=ZRANB2 PE=1 SV=2	2	10	10	10	10	9	9	10	9	9	10	9	9	10	9	9	10	9	9	10	9	9	21.1	21.1	21.1	38.223	337	337;330	0	131.95	By MS/MS	By MS/MS	By MS/MS	By MS/MS	By MS/MS	By MS/MS	21.1	18.7	18.7	21.1	18.7	21.1
A2AJT9;H7BXX2;F2Z385	A2AJT9;H7BXX2;F2Z385	10;6;5	10;6;5	10;6;5	Uncharacterized protein CXorf23	CXorf23	sp|A2AJT9|CX023_HUMAN Uncharacterized protein CXorf23 OS=Homo sapiens GN=CXorf23 PE=1 SV=1;tr|H7BXX2|H7BXX2_HUMAN Uncharacterized protein CXorf23 (Fragment) OS=Homo sapiens GN=CXorf23 PE=1 SV=1;tr|F2Z385|F2Z385_HUMAN Uncharacterized protein CXorf23 OS=Homo	3	10	10	10	10	10	10	5	7	7	10	10	10	5	7	7	10	10	10	5	7	7	20.8	20.8	20.8	83.87	711	711;234;240	0	68.193	By MS/MS	By MS/MS	By MS/MS	By MS/MS	By MS/MS	By MS/MS	20.8	20.8	20.8	10.5	14.8	13.1
F5H2F4;P11586;V9GYY3	F5H2F4;P11586	10;10;2	10;10;2	10;10;2	C-1-tetrahydrofolate synthase, cytoplasmic;Methylenetetrahydrofolate dehydrogenase;Methenyltetrahydrofolate cyclohydrolase;Formyltetrahydrofolate synthetase;C-1-tetrahydrofolate synthase, cytoplasmic, N-terminally processed	MTHFD1	tr|F5H2F4|F5H2F4_HUMAN C-1-tetrahydrofolate synthase, cytoplasmic OS=Homo sapiens GN=MTHFD1 PE=1 SV=1;sp|P11586|C1TC_HUMAN C-1-tetrahydrofolate synthase, cytoplasmic OS=Homo sapiens GN=MTHFD1 PE=1 SV=3	3	10	10	10	3	2	6	9	9	7	3	2	6	9	9	7	3	2	6	9	9	7	11.4	11.4	11.4	110.61	1020	1020;935;107	0	63.943	By matching	By matching	By matching	By MS/MS	By MS/MS	By MS/MS	3.5	2.5	6.8	10.5	10.3	7.8
F8VZY9;P05783;CON__P05784;K7EMD9;C9JM50;CON__H-INV:HIT000015463;CON__P08727;CON__P19001;CON__Q14525;K7ERE3;CON__Q9UE12;CON__Q15323;CON__A2A5Y0;CON__ENSEMBL:ENSP00000377550;CON__Q92764;C4AM86;CON__P08730-1;CON__Q14532;CON__Q6IFX2;CON__A2AB72;CON__Q497I4;CON__P19012;CON__O76015;CON__O76014;CON__REFSEQ:XP_986630;CON__Q2M2I5;P08727;Q14525;Q15323;Q14532;O76014;Q92764;P19012;O76015;P13646;Q2M2I5	F8VZY9;P05783	11;11;3;1;1;1;1;1;1;1;1;1;1;1;1;1;1;1;1;1;1;1;1;1;1;1;1;1;1;1;1;1;1;1;1;1	11;11;3;1;1;1;1;1;1;1;1;1;1;1;1;1;1;1;1;1;1;1;1;1;1;1;1;1;1;1;1;1;1;1;1;1	10;10;2;0;0;1;0;0;0;0;0;0;0;0;0;0;0;0;0;0;0;0;0;0;0;0;0;0;0;0;0;0;0;0;0;0	Keratin, type I cytoskeletal 18	KRT18	tr|F8VZY9|F8VZY9_HUMAN Keratin, type I cytoskeletal 18 OS=Homo sapiens GN=KRT18 PE=1 SV=1;sp|P05783|K1C18_HUMAN Keratin, type I cytoskeletal 18 OS=Homo sapiens GN=KRT18 PE=1 SV=2	36	11	11	10	9	7	7	2	3	1	9	7	7	2	3	1	8	6	6	1	2	0	35.8	35.8	34	43.774	391	391;430;423;165;196;295;400;403;404;415;416;416;416;420;425;425;437;448;452;453;455;456;456;471;476;525;400;404;416;448;449;455;456;456;458;525	0	80.472	By MS/MS	By MS/MS	By MS/MS	By matching	By matching	By matching	33.5	26.6	24	6.4	11.3	1.8
F8WJN3;Q16630	F8WJN3;Q16630	10;10	10;10	10;10	Cleavage and polyadenylation specificity factor subunit 6	CPSF6	tr|F8WJN3|F8WJN3_HUMAN Cleavage and polyadenylation-specificity factor subunit 6 OS=Homo sapiens GN=CPSF6 PE=1 SV=1;sp|Q16630|CPSF6_HUMAN Cleavage and polyadenylation specificity factor subunit 6 OS=Homo sapiens GN=CPSF6 PE=1 SV=2	2	10	10	10	8	7	8	9	8	10	8	7	8	9	8	10	8	7	8	9	8	10	21.8	21.8	21.8	52.269	478	478;551	0	74.193	By MS/MS	By MS/MS	By MS/MS	By MS/MS	By MS/MS	By MS/MS	15.5	15.5	18.8	21.5	15.5	21.8
O43175;Q5SZU1	O43175;Q5SZU1	10;7	10;7	10;7	D-3-phosphoglycerate dehydrogenase	PHGDH	sp|O43175|SERA_HUMAN D-3-phosphoglycerate dehydrogenase OS=Homo sapiens GN=PHGDH PE=1 SV=4;tr|Q5SZU1|Q5SZU1_HUMAN D-3-phosphoglycerate dehydrogenase OS=Homo sapiens GN=PHGDH PE=1 SV=1	2	10	10	10	8	7	9	10	10	10	8	7	9	10	10	10	8	7	9	10	10	10	22.5	22.5	22.5	56.65	533	533;499	0	78.354	By MS/MS	By MS/MS	By MS/MS	By MS/MS	By MS/MS	By MS/MS	18.8	17.1	20.6	22.5	22.5	22.5
P00338;F5GYU2;F5GXY2;F5GXH2;A0A087WUM2;Q6ZMR3;F5H8H6;F5GXC7;F5GWW2;F5GXU1;F5GZQ4;F5H5J4;F5H6W8	P00338	11;5;5;4;2;2;1;1;1;1;1;1;1	10;5;5;4;1;1;1;1;1;1;1;1;1	10;5;5;4;1;1;1;1;1;1;1;1;1	L-lactate dehydrogenase A chain	LDHA	sp|P00338|LDHA_HUMAN L-lactate dehydrogenase A chain OS=Homo sapiens GN=LDHA PE=1 SV=2	13	11	10	10	7	6	8	10	11	8	6	5	7	9	10	7	6	5	7	9	10	7	37.3	37.3	37.3	36.688	332	332;144;157;114;233;332;42;45;45;46;72;89;94	0	93.6	By MS/MS	By MS/MS	By MS/MS	By MS/MS	By MS/MS	By MS/MS	18.1	15.7	20.8	26.8	37.3	30.4
Q5T7C4;P09429;B2RPK0;P23497	Q5T7C4;P09429;B2RPK0	12;12;8;1	12;12;8;1	10;10;6;1	High mobility group protein B1;Putative high mobility group protein B1-like 1	HMGB1;HMGB1P1	tr|Q5T7C4|Q5T7C4_HUMAN High mobility group protein B1 OS=Homo sapiens GN=HMGB1 PE=1 SV=1;sp|P09429|HMGB1_HUMAN High mobility group protein B1 OS=Homo sapiens GN=HMGB1 PE=1 SV=3;sp|B2RPK0|HGB1A_HUMAN Putative high mobility group protein B1-like 1 OS=Homo sa	4	12	12	10	9	11	11	11	11	12	9	11	11	11	11	12	8	9	9	9	9	10	60.8	60.8	51.9	18.311	158	158;215;211;879	0	164.49	By MS/MS	By MS/MS	By MS/MS	By MS/MS	By MS/MS	By MS/MS	50.6	60.8	60.8	60.8	60.8	60.8
P30101;H7BZJ3	P30101	10;3	10;3	10;3	Protein disulfide-isomerase A3	PDIA3	sp|P30101|PDIA3_HUMAN Protein disulfide-isomerase A3 OS=Homo sapiens GN=PDIA3 PE=1 SV=4	2	10	10	10	4	4	9	10	10	9	4	4	9	10	10	9	4	4	9	10	10	9	20	20	20	56.782	505	505;123	0	65.667	By matching	By matching	By MS/MS	By MS/MS	By MS/MS	By MS/MS	9.1	9.5	18.2	20	20	18.2
P34932;A0A087WYC1;A0A087WTS8	P34932;A0A087WYC1;A0A087WTS8	11;10;8	11;10;8	10;9;7	Heat shock 70 kDa protein 4	HSPA4	sp|P34932|HSP74_HUMAN Heat shock 70 kDa protein 4 OS=Homo sapiens GN=HSPA4 PE=1 SV=4;tr|A0A087WYC1|A0A087WYC1_HUMAN Heat shock 70 kDa protein 4 OS=Homo sapiens GN=HSPA4 PE=1 SV=1;tr|A0A087WTS8|A0A087WTS8_HUMAN Heat shock 70 kDa protein 4 OS=Homo sapiens GN	3	11	11	10	7	5	7	10	10	9	7	5	7	10	10	9	6	5	7	9	9	8	17.7	17.7	16.1	94.33	840	840;699;475	0	71.868	By MS/MS	By matching	By matching	By MS/MS	By MS/MS	By MS/MS	10.7	8.8	12.3	16.4	16	15.2
P50914;E7EPB3	P50914;E7EPB3	10;7	10;7	10;7	60S ribosomal protein L14	RPL14	sp|P50914|RL14_HUMAN 60S ribosomal protein L14 OS=Homo sapiens GN=RPL14 PE=1 SV=4;tr|E7EPB3|E7EPB3_HUMAN 60S ribosomal protein L14 OS=Homo sapiens GN=RPL14 PE=1 SV=1	2	10	10	10	7	7	10	9	10	8	7	7	10	9	10	8	7	7	10	9	10	8	40.5	40.5	40.5	23.432	215	215;124	0	113.02	By MS/MS	By MS/MS	By MS/MS	By MS/MS	By MS/MS	By MS/MS	30.2	26	40.5	36.3	40.5	31.6
Q00839	Q00839	10	10	10	Heterogeneous nuclear ribonucleoprotein U	HNRNPU	sp|Q00839|HNRPU_HUMAN Heterogeneous nuclear ribonucleoprotein U OS=Homo sapiens GN=HNRNPU PE=1 SV=6	1	10	10	10	5	6	8	10	10	9	5	6	8	10	10	9	5	6	8	10	10	9	17.6	17.6	17.6	90.583	825	825	0	73.698	By MS/MS	By MS/MS	By MS/MS	By MS/MS	By MS/MS	By MS/MS	8.6	9.7	13.9	17.6	17.6	16.5
Q02790;H0YFG2;F5H120;F5H1U3	Q02790	10;3;1;1	10;3;1;1	10;3;1;1	Peptidyl-prolyl cis-trans isomerase FKBP4;Peptidyl-prolyl cis-trans isomerase FKBP4, N-terminally processed	FKBP4	sp|Q02790|FKBP4_HUMAN Peptidyl-prolyl cis-trans isomerase FKBP4 OS=Homo sapiens GN=FKBP4 PE=1 SV=3	4	10	10	10	7	8	8	9	9	9	7	8	8	9	9	9	7	8	8	9	9	9	26.6	26.6	26.6	51.804	459	459;84;51;86	0	70.596	By matching	By matching	By MS/MS	By MS/MS	By MS/MS	By MS/MS	15.9	19.2	19.2	23.7	23.7	24.4
Q08J23;A0A140T9Y7	Q08J23	10;1	10;1	10;1	tRNA (cytosine(34)-C(5))-methyltransferase	NSUN2	sp|Q08J23|NSUN2_HUMAN tRNA (cytosine(34)-C(5))-methyltransferase OS=Homo sapiens GN=NSUN2 PE=1 SV=2	2	10	10	10	9	9	7	8	7	6	9	9	7	8	7	6	9	9	7	8	7	6	15.5	15.5	15.5	86.47	767	767;202	0	63.438	By MS/MS	By MS/MS	By MS/MS	By MS/MS	By MS/MS	By MS/MS	13.6	13.6	10.8	12.8	10.8	9.9
Q13263;M0R0K9;M0R2I3;M0R3C0	Q13263	10;4;3;3	10;4;3;3	10;4;3;3	Transcription intermediary factor 1-beta	TRIM28	sp|Q13263|TIF1B_HUMAN Transcription intermediary factor 1-beta OS=Homo sapiens GN=TRIM28 PE=1 SV=5	4	10	10	10	3	4	10	10	9	10	3	4	10	10	9	10	3	4	10	10	9	10	19.5	19.5	19.5	88.549	835	835;460;162;178	0	82.063	By matching	By matching	By MS/MS	By MS/MS	By MS/MS	By MS/MS	5.3	10.5	19.5	19.5	16.5	19.5
Q9BVP2;C9JYH9;C9JZT7;B4DMU5	Q9BVP2	10;2;2;2	10;2;2;2	10;2;2;2	Guanine nucleotide-binding protein-like 3	GNL3	sp|Q9BVP2|GNL3_HUMAN Guanine nucleotide-binding protein-like 3 OS=Homo sapiens GN=GNL3 PE=1 SV=2	4	10	10	10	8	3	6	8	9	7	8	3	6	8	9	7	8	3	6	8	9	7	21.3	21.3	21.3	61.992	549	549;96;135;138	0	68.409	By MS/MS	By matching	By MS/MS	By MS/MS	By MS/MS	By MS/MS	18.6	6.7	11.1	18	16.9	15.1
B4DM58;P00374;C9JJ68;Q86XF0	B4DM58;P00374	9;9;2;2	9;9;2;2	9;9;2;2	Dihydrofolate reductase	DHFR	tr|B4DM58|B4DM58_HUMAN Dihydrofolate reductase OS=Homo sapiens GN=DHFR PE=1 SV=1;sp|P00374|DYR_HUMAN Dihydrofolate reductase OS=Homo sapiens GN=DHFR PE=1 SV=2	4	9	9	9	9	9	9	8	9	7	9	9	9	8	9	7	9	9	9	8	9	7	62.8	62.8	62.8	14.5	129	129;187;114;187	0	66.062	By MS/MS	By MS/MS	By MS/MS	By MS/MS	By MS/MS	By MS/MS	62.8	62.8	62.8	59.7	62.8	53.5
F5GY37;J3KPX7;Q99623;F5GWA7;F5H3X6;F5H2D2;F5H0C5	F5GY37;J3KPX7;Q99623;F5GWA7	9;9;9;6;4;1;1	9;9;9;6;4;1;1	9;9;9;6;4;1;1	Prohibitin-2	PHB2	tr|F5GY37|F5GY37_HUMAN Prohibitin-2 OS=Homo sapiens GN=PHB2 PE=1 SV=1;tr|J3KPX7|J3KPX7_HUMAN Prohibitin-2 OS=Homo sapiens GN=PHB2 PE=1 SV=2;sp|Q99623|PHB2_HUMAN Prohibitin-2 OS=Homo sapiens GN=PHB2 PE=1 SV=2;tr|F5GWA7|F5GWA7_HUMAN Prohibitin-2 (Fragment) O	7	9	9	9	2	2	6	9	7	7	2	2	6	9	7	7	2	2	6	9	7	7	34.5	34.5	34.5	29.723	267	267;298;299;261;213;87;112	0	67.406	By matching	By matching	By MS/MS	By MS/MS	By MS/MS	By MS/MS	5.2	5.2	19.9	34.5	24.7	23.6
F6TDL0;Q92569;Q5T4P3	F6TDL0;Q92569	11;11;3	11;11;3	9;9;3	Phosphatidylinositol 3-kinase regulatory subunit gamma	PIK3R3	tr|F6TDL0|F6TDL0_HUMAN Phosphatidylinositol 3-kinase regulatory subunit gamma OS=Homo sapiens GN=PIK3R3 PE=1 SV=1;sp|Q92569|P55G_HUMAN Phosphatidylinositol 3-kinase regulatory subunit gamma OS=Homo sapiens GN=PIK3R3 PE=1 SV=2	3	11	11	9	11	11	10	9	10	10	11	11	10	9	10	10	9	9	8	7	8	8	25.2	25.2	20.7	59.394	507	507;461;206	0	70.091	By MS/MS	By MS/MS	By MS/MS	By MS/MS	By MS/MS	By MS/MS	25.2	25.2	23.5	21.9	23.5	23.5
H0Y4R1;P12268;E7ETK5	H0Y4R1;P12268	9;9;4	9;9;4	9;9;4	Inosine-5-monophosphate dehydrogenase 2	IMPDH2	tr|H0Y4R1|H0Y4R1_HUMAN Inosine-5-monophosphate dehydrogenase 2 (Fragment) OS=Homo sapiens GN=IMPDH2 PE=1 SV=1;sp|P12268|IMDH2_HUMAN Inosine-5-monophosphate dehydrogenase 2 OS=Homo sapiens GN=IMPDH2 PE=1 SV=2	3	9	9	9	8	7	8	8	9	7	8	7	8	8	9	7	8	7	8	8	9	7	24.3	24.3	24.3	50.957	470	470;514;279	0	64.457	By MS/MS	By MS/MS	By MS/MS	By MS/MS	By MS/MS	By MS/MS	21.9	17.7	21.3	20	24.3	19.4
H0YEN5;P15880;E9PQD7;I3L404;E9PM36;E9PMM9;E9PPT0	H0YEN5;P15880;E9PQD7	9;9;7;4;4;3;1	9;9;7;4;4;3;1	9;9;7;4;4;3;1	40S ribosomal protein S2	RPS2	tr|H0YEN5|H0YEN5_HUMAN 40S ribosomal protein S2 (Fragment) OS=Homo sapiens GN=RPS2 PE=1 SV=1;sp|P15880|RS2_HUMAN 40S ribosomal protein S2 OS=Homo sapiens GN=RPS2 PE=1 SV=2;tr|E9PQD7|E9PQD7_HUMAN 40S ribosomal protein S2 OS=Homo sapiens GN=RPS2 PE=1 SV=1	7	9	9	9	7	9	9	9	9	7	7	9	9	9	9	7	7	9	9	9	9	7	50.8	50.8	50.8	21.154	195	195;293;235;155;209;218;197	0	67.831	By MS/MS	By MS/MS	By MS/MS	By MS/MS	By MS/MS	By MS/MS	40	50.8	50.8	50.8	50.8	40
H3BLZ8;Q92841;A0A0U1RQJ0;J3KRZ1;J3QSF1	H3BLZ8;Q92841	12;12;2;2;1	12;12;2;2;1	9;9;1;0;0	Probable ATP-dependent RNA helicase DDX17	DDX17	tr|H3BLZ8|H3BLZ8_HUMAN Probable ATP-dependent RNA helicase DDX17 OS=Homo sapiens GN=DDX17 PE=1 SV=1;sp|Q92841|DDX17_HUMAN Probable ATP-dependent RNA helicase DDX17 OS=Homo sapiens GN=DDX17 PE=1 SV=2	5	12	12	9	9	4	8	12	11	10	9	4	8	12	11	10	7	3	6	9	8	7	20.7	20.7	17.4	80.439	731	731;729;56;166;153	0	82.392	By MS/MS	By MS/MS	By MS/MS	By MS/MS	By MS/MS	By MS/MS	15.3	5.6	13.3	20.7	19.2	16.4
M0R1A7;M0R117;Q02543;M0R3D6;M0R0P7	M0R1A7;M0R117;Q02543;M0R3D6;M0R0P7	9;9;9;8;6	9;9;9;8;6	9;9;9;8;6	60S ribosomal protein L18a	RPL18A	tr|M0R1A7|M0R1A7_HUMAN 60S ribosomal protein L18a OS=Homo sapiens GN=RPL18A PE=1 SV=1;tr|M0R117|M0R117_HUMAN 60S ribosomal protein L18a OS=Homo sapiens GN=RPL18A PE=1 SV=1;sp|Q02543|RL18A_HUMAN 60S ribosomal protein L18a OS=Homo sapiens GN=RPL18A PE=1 SV=2	5	9	9	9	7	8	9	9	9	9	7	8	9	9	9	9	7	8	9	9	9	9	57.1	57.1	57.1	17.477	147	147;154;176;141;137	0	66.151	By MS/MS	By MS/MS	By MS/MS	By MS/MS	By MS/MS	By MS/MS	47.6	49	57.1	57.1	57.1	57.1
P04264;CON__P04264;CON__Q6IFZ6;CON__Q9R0H5;CON__Q6NXH9;CON__Q7Z794;Q7Z794	P04264;CON__P04264	16;15;2;1;1;1;1	16;15;2;1;1;1;1	9;8;0;0;0;0;0	Keratin, type II cytoskeletal 1	KRT1	sp|P04264|K2C1_HUMAN Keratin, type II cytoskeletal 1 OS=Homo sapiens GN=KRT1 PE=1 SV=6;	7	16	16	9	13	10	11	12	15	13	13	10	11	12	15	13	7	5	6	6	9	7	25.3	25.3	14	66.038	644	644;644;572;524;539;578;578	0	151.07	By MS/MS	By MS/MS	By MS/MS	By MS/MS	By MS/MS	By MS/MS	21.1	18.3	18.3	19.7	23.9	19.6
P26641	P26641	9	9	9	Elongation factor 1-gamma	EEF1G	sp|P26641|EF1G_HUMAN Elongation factor 1-gamma OS=Homo sapiens GN=EEF1G PE=1 SV=3	1	9	9	9	7	4	8	7	8	6	7	4	8	7	8	6	7	4	8	7	8	6	24.3	24.3	24.3	50.118	437	437	0	69.652	By MS/MS	By MS/MS	By MS/MS	By MS/MS	By MS/MS	By MS/MS	19.9	11.4	22.9	18.5	21.3	18.5
P37802;X6RJP6;C9J5W6;Q9UI15	P37802;X6RJP6	9;8;1;1	9;8;1;1	9;8;1;1	Transgelin-2	TAGLN2	sp|P37802|TAGL2_HUMAN Transgelin-2 OS=Homo sapiens GN=TAGLN2 PE=1 SV=3;tr|X6RJP6|X6RJP6_HUMAN Transgelin-2 (Fragment) OS=Homo sapiens GN=TAGLN2 PE=1 SV=1	4	9	9	9	6	6	8	8	8	8	6	6	8	8	8	8	6	6	8	8	8	8	52.3	52.3	52.3	22.391	199	199;187;115;199	0	67.264	By MS/MS	By MS/MS	By MS/MS	By MS/MS	By MS/MS	By MS/MS	35.2	36.7	47.7	47.7	47.7	45.2
P61353;K7ELC7;K7EQQ9;K7ERY7	P61353;K7ELC7;K7EQQ9	9;7;5;2	9;7;5;2	9;7;5;2	60S ribosomal protein L27	RPL27	sp|P61353|RL27_HUMAN 60S ribosomal protein L27 OS=Homo sapiens GN=RPL27 PE=1 SV=2;tr|K7ELC7|K7ELC7_HUMAN 60S ribosomal protein L27 (Fragment) OS=Homo sapiens GN=RPL27 PE=1 SV=1;tr|K7EQQ9|K7EQQ9_HUMAN 60S ribosomal protein L27 OS=Homo sapiens GN=RPL27 PE=1	4	9	9	9	8	7	8	8	8	6	8	7	8	8	8	6	8	7	8	8	8	6	58.1	58.1	58.1	15.798	136	136;144;80;40	0	86.566	By MS/MS	By MS/MS	By MS/MS	By MS/MS	By MS/MS	By MS/MS	53.7	48.5	53.7	52.9	52.9	42.6
P61978;Q5T6W2;S4R457	P61978;Q5T6W2	9;8;1	9;8;1	9;8;1	Heterogeneous nuclear ribonucleoprotein K	HNRNPK	sp|P61978|HNRPK_HUMAN Heterogeneous nuclear ribonucleoprotein K OS=Homo sapiens GN=HNRNPK PE=1 SV=1;tr|Q5T6W2|Q5T6W2_HUMAN Heterogeneous nuclear ribonucleoprotein K (Fragment) OS=Homo sapiens GN=HNRNPK PE=1 SV=1	3	9	9	9	1	3	6	9	9	7	1	3	6	9	9	7	1	3	6	9	9	7	24.4	24.4	24.4	50.976	463	463;379;77	0	56.735	By matching	By matching	By MS/MS	By MS/MS	By MS/MS	By MS/MS	2.6	7.3	13.8	24.4	24.4	21
P62081;B5MCP9	P62081;B5MCP9	9;6	9;6	9;6	40S ribosomal protein S7	RPS7	sp|P62081|RS7_HUMAN 40S ribosomal protein S7 OS=Homo sapiens GN=RPS7 PE=1 SV=1;tr|B5MCP9|B5MCP9_HUMAN 40S ribosomal protein S7 OS=Homo sapiens GN=RPS7 PE=1 SV=1	2	9	9	9	5	6	6	6	7	9	5	6	6	6	7	9	5	6	6	6	7	9	50	50	50	22.127	194	194;187	0	74.42	By matching	By matching	By MS/MS	By MS/MS	By MS/MS	By MS/MS	23.2	29.4	29.4	22.7	38.1	50
Q12906;K7ERM6;K7ENK6;K7EM82;K7EJ09;K7ER69;K7EQR9;K7EKJ9;Q96SI9	Q12906	9;1;1;1;1;1;1;1;1	9;1;1;1;1;1;1;1;1	9;1;1;1;1;1;1;1;1	Interleukin enhancer-binding factor 3	ILF3	sp|Q12906|ILF3_HUMAN Interleukin enhancer-binding factor 3 OS=Homo sapiens GN=ILF3 PE=1 SV=3	9	9	9	9	3	2	3	9	9	4	3	2	3	9	9	4	3	2	3	9	9	4	13.8	13.8	13.8	95.337	894	894;78;79;99;122;161;180;254;672	0	58.924	By matching	By matching	By MS/MS	By MS/MS	By MS/MS	By MS/MS	3.8	3	4.4	13.8	13.8	5.7
Q13427;E9PG73;C9JN15;C9JM79;C9JT64;C9J679	Q13427;E9PG73;C9JN15;C9JM79	9;8;7;7;2;2	9;8;7;7;2;2	9;8;7;7;2;2	Peptidyl-prolyl cis-trans isomerase G;Peptidyl-prolyl cis-trans isomerase	PPIG	sp|Q13427|PPIG_HUMAN Peptidyl-prolyl cis-trans isomerase G OS=Homo sapiens GN=PPIG PE=1 SV=2;tr|E9PG73|E9PG73_HUMAN Peptidyl-prolyl cis-trans isomerase G OS=Homo sapiens GN=PPIG PE=1 SV=1;tr|C9JN15|C9JN15_HUMAN Peptidyl-prolyl cis-trans isomerase (Fragment	6	9	9	9	9	9	9	9	8	6	9	9	9	9	8	6	9	9	9	9	8	6	12.5	12.5	12.5	88.616	754	754;739;246;487;59;104	0	84.716	By MS/MS	By MS/MS	By MS/MS	By MS/MS	By MS/MS	By MS/MS	12.5	12.5	12.5	12.5	11.1	8
Q14247;H0YCD9;H0YEV2	Q14247	9;2;1	9;2;1	9;2;1	Src substrate cortactin	CTTN	sp|Q14247|SRC8_HUMAN Src substrate cortactin OS=Homo sapiens GN=CTTN PE=1 SV=2	3	9	9	9	8	9	8	9	9	9	8	9	8	9	9	9	8	9	8	9	9	9	21.3	21.3	21.3	61.585	550	550;265;128	0	56.298	By MS/MS	By MS/MS	By MS/MS	By MS/MS	By MS/MS	By MS/MS	18.2	21.3	19.3	21.3	21.3	21.3
Q15149	Q15149	11	11	9	Plectin	PLEC	sp|Q15149|PLEC_HUMAN Plectin OS=Homo sapiens GN=PLEC PE=1 SV=3	1	11	11	9	11	8	7	3	1	0	11	8	7	3	1	0	9	7	6	3	1	0	3.8	3.8	3	531.78	4684	4684	0	85.995	By MS/MS	By MS/MS	By MS/MS	By matching	By matching		3.8	3.1	2.5	1.2	0.5	0
Q5HYB6;A0A087WWU8;Q5VU61;D6R904;D6RFM2	Q5HYB6;A0A087WWU8;Q5VU61;D6R904	23;22;17;12;5	23;22;17;12;5	9;9;5;9;5		DKFZp686J1372;TPM3	tr|Q5HYB6|Q5HYB6_HUMAN Epididymis luminal protein 189 OS=Homo sapiens GN=DKFZp686J1372 PE=1 SV=1;tr|A0A087WWU8|A0A087WWU8_HUMAN Tropomyosin alpha-3 chain OS=Homo sapiens GN=TPM3 PE=1 SV=1;tr|Q5VU61|Q5VU61_HUMAN Tropomyosin alpha-3 chain OS=Homo sapiens GN=	5	23	23	9	22	23	23	22	21	19	22	23	23	22	21	19	9	9	9	8	8	7	59.5	59.5	17.7	27.175	232	232;227;223;95;49	0	221.62	By MS/MS	By MS/MS	By MS/MS	By MS/MS	By MS/MS	By MS/MS	59.5	59.5	59.5	59.5	59.5	56
Q8WXA9;H0YC47	Q8WXA9	9;2	9;2	9;2	Splicing regulatory glutamine/lysine-rich protein 1	SREK1	sp|Q8WXA9|SREK1_HUMAN Splicing regulatory glutamine/lysine-rich protein 1 OS=Homo sapiens GN=SREK1 PE=1 SV=1	2	9	9	9	9	9	9	9	9	5	9	9	9	9	9	5	9	9	9	9	9	5	20.9	20.9	20.9	59.38	508	508;60	0	69.058	By MS/MS	By MS/MS	By MS/MS	By MS/MS	By MS/MS	By MS/MS	20.9	20.9	20.9	20.9	20.9	8.9
A0A087WTP3;Q92945;M0QYH3;M0QXW7;M0R0I5;M0R3J3	A0A087WTP3;Q92945;M0QYH3	8;8;4;3;3;1	8;8;4;3;3;1	8;8;4;3;3;1	Far upstream element-binding protein 2	KHSRP	tr|A0A087WTP3|A0A087WTP3_HUMAN Far upstream element-binding protein 2 OS=Homo sapiens GN=KHSRP PE=1 SV=1;sp|Q92945|FUBP2_HUMAN Far upstream element-binding protein 2 OS=Homo sapiens GN=KHSRP PE=1 SV=4;tr|M0QYH3|M0QYH3_HUMAN Far upstream element-binding pro	6	8	8	8	4	5	8	7	7	7	4	5	8	7	7	7	4	5	8	7	7	7	17.2	17.2	17.2	73.027	711	711;711;169;116;279;269	0	54.346	By matching	By matching	By MS/MS	By MS/MS	By MS/MS	By MS/MS	10.4	11.8	17.2	15.6	15.6	15.6
E7ETK0;A0A087WUS0;P62847	E7ETK0;A0A087WUS0;P62847	8;8;8	8;8;8	8;8;8	40S ribosomal protein S24	RPS24	tr|E7ETK0|E7ETK0_HUMAN 40S ribosomal protein S24 OS=Homo sapiens GN=RPS24 PE=1 SV=1;tr|A0A087WUS0|A0A087WUS0_HUMAN 40S ribosomal protein S24 OS=Homo sapiens GN=RPS24 PE=1 SV=1;sp|P62847|RS24_HUMAN 40S ribosomal protein S24 OS=Homo sapiens GN=RPS24 PE=1 SV=	3	8	8	8	8	7	8	8	7	8	8	7	8	8	7	8	8	7	8	8	7	8	40.5	40.5	40.5	15.197	131	131;132;133	0	56.081	By MS/MS	By MS/MS	By MS/MS	By MS/MS	By MS/MS	By MS/MS	40.5	40.5	40.5	40.5	40.5	40.5
A0A0A0MQS2;Q8N2M8;F5H0Q6;K7EM61;K7EKC9	A0A0A0MQS2;Q8N2M8;F5H0Q6	8;8;7;3;2	8;8;7;3;2	8;8;7;3;2	CLK4-associating serine/arginine rich protein	CLASRP	tr|A0A0A0MQS2|A0A0A0MQS2_HUMAN CLK4-associating serine/arginine-rich protein OS=Homo sapiens GN=CLASRP PE=1 SV=1;sp|Q8N2M8|CLASR_HUMAN CLK4-associating serine/arginine rich protein OS=Homo sapiens GN=CLASRP PE=1 SV=4;tr|F5H0Q6|F5H0Q6_HUMAN CLK4-associating	5	8	8	8	7	8	7	7	8	6	7	8	7	7	8	6	7	8	7	7	8	6	13.9	13.9	13.9	77.161	674	674;674;655;188;86	0	73.06	By MS/MS	By MS/MS	By MS/MS	By MS/MS	By MS/MS	By MS/MS	13.9	13.9	11.9	13.9	13.9	11.9
A0A0A0MT33;Q9UPN6	A0A0A0MT33;Q9UPN6	8;8	8;8	8;8	Protein SCAF8	SCAF8	tr|A0A0A0MT33|A0A0A0MT33_HUMAN Protein SCAF8 OS=Homo sapiens GN=SCAF8 PE=1 SV=1;sp|Q9UPN6|SCAF8_HUMAN Protein SCAF8 OS=Homo sapiens GN=SCAF8 PE=1 SV=1	2	8	8	8	6	7	8	8	8	6	6	7	8	8	8	6	6	7	8	8	8	6	7.8	7.8	7.8	148.86	1349	1349;1271	0	56.251	By MS/MS	By MS/MS	By MS/MS	By MS/MS	By MS/MS	By MS/MS	6.2	6.9	7.8	7.8	7.8	6.2
A0A0D9SF54;A0A0D9SGF6;Q13813;A0A0D9SFF6	A0A0D9SF54;A0A0D9SGF6;Q13813	8;8;8;1	8;8;8;1	8;8;8;1	Spectrin alpha chain, non-erythrocytic 1	SPTAN1	tr|A0A0D9SF54|A0A0D9SF54_HUMAN Spectrin alpha chain, non-erythrocytic 1 OS=Homo sapiens GN=SPTAN1 PE=1 SV=1;tr|A0A0D9SGF6|A0A0D9SGF6_HUMAN Spectrin alpha chain, non-erythrocytic 1 OS=Homo sapiens GN=SPTAN1 PE=1 SV=1;sp|Q13813|SPTN1_HUMAN Spectrin alpha cha	4	8	8	8	5	5	3	8	6	7	5	5	3	8	6	7	5	5	3	8	6	7	4.5	4.5	4.5	282.83	2457	2457;2498;2472;153	0	48.586	By matching	By matching	By matching	By MS/MS	By MS/MS	By MS/MS	2.5	2.5	1.7	4.5	3.7	4.1
B1AHC9;P12956	B1AHC9;P12956	8;8	8;8	8;8	X-ray repair cross-complementing protein 6	XRCC6	tr|B1AHC9|B1AHC9_HUMAN X-ray repair cross-complementing protein 6 OS=Homo sapiens GN=XRCC6 PE=1 SV=1;sp|P12956|XRCC6_HUMAN X-ray repair cross-complementing protein 6 OS=Homo sapiens GN=XRCC6 PE=1 SV=2	2	8	8	8	3	3	6	8	8	6	3	3	6	8	8	6	3	3	6	8	8	6	17.9	17.9	17.9	64.283	559	559;609	0	54.656	By matching	By matching	By MS/MS	By MS/MS	By MS/MS	By MS/MS	5	5.5	12.3	17.9	17.9	13.2
Q99613;B5ME19;H3BPE4;H3BTY8;H3BPE3	Q99613;B5ME19	8;8;2;1;1	8;8;2;1;1	8;8;2;1;1	Eukaryotic translation initiation factor 3 subunit C;Eukaryotic translation initiation factor 3 subunit C-like protein	EIF3C;EIF3CL	sp|Q99613|EIF3C_HUMAN Eukaryotic translation initiation factor 3 subunit C OS=Homo sapiens GN=EIF3C PE=1 SV=1;sp|B5ME19|EIFCL_HUMAN Eukaryotic translation initiation factor 3 subunit C-like protein OS=Homo sapiens GN=EIF3CL PE=3 SV=1	5	8	8	8	7	8	7	7	7	6	7	8	7	7	7	6	7	8	7	7	7	6	10.2	10.2	10.2	105.34	913	913;914;148;80;133	0	56.754	By MS/MS	By MS/MS	By MS/MS	By MS/MS	By MS/MS	By MS/MS	9.1	10.2	8.7	9.2	9.2	7.6
CON__P00761	CON__P00761	8	8	8				1	8	8	8	7	7	7	7	7	8	7	7	7	7	7	8	7	7	7	7	7	8	26.8	26.8	26.8	24.409	231	231	0	323.31	By MS/MS	By MS/MS	By MS/MS	By MS/MS	By MS/MS	By MS/MS	26.8	26.8	26.8	26.8	26.8	26.8
D3YTB1;F8W727;P62910;D3YTI8	D3YTB1;F8W727;P62910	8;8;8;1	8;8;8;1	8;8;8;1	60S ribosomal protein L32	RPL32	tr|D3YTB1|D3YTB1_HUMAN 60S ribosomal protein L32 (Fragment) OS=Homo sapiens GN=RPL32 PE=1 SV=1;tr|F8W727|F8W727_HUMAN 60S ribosomal protein L32 OS=Homo sapiens GN=RPL32 PE=1 SV=1;sp|P62910|RL32_HUMAN 60S ribosomal protein L32 OS=Homo sapiens GN=RPL32 PE=1	4	8	8	8	6	7	7	6	7	6	6	7	7	6	7	6	6	7	7	6	7	6	57.1	57.1	57.1	15.616	133	133;153;135;62	0	85.506	By MS/MS	By MS/MS	By MS/MS	By MS/MS	By MS/MS	By MS/MS	39.1	44.4	44.4	49.6	54.9	45.1
D6R956;P09936;D6R974;D6RE83;D6RF53	D6R956;P09936;D6R974;D6RE83	8;8;7;7;2	8;8;7;7;2	8;8;7;7;2	Ubiquitin carboxyl-terminal hydrolase;Ubiquitin carboxyl-terminal hydrolase isozyme L1	UCHL1	tr|D6R956|D6R956_HUMAN Ubiquitin carboxyl-terminal hydrolase OS=Homo sapiens GN=UCHL1 PE=1 SV=1;sp|P09936|UCHL1_HUMAN Ubiquitin carboxyl-terminal hydrolase isozyme L1 OS=Homo sapiens GN=UCHL1 PE=1 SV=2;tr|D6R974|D6R974_HUMAN Ubiquitin carboxyl-terminal hyd	5	8	8	8	7	7	7	7	8	7	7	7	7	7	8	7	7	7	7	7	8	7	46.1	46.1	46.1	26.839	241	241;223;156;207;58	0	96.981	By MS/MS	By MS/MS	By MS/MS	By MS/MS	By MS/MS	By MS/MS	40.7	40.7	40.7	40.7	46.1	40.7
E5RIW3;E5RJD8;O75347;E5RHG6;E5RIX8	E5RIW3;E5RJD8;O75347;E5RHG6	8;8;8;7;3	8;8;8;7;3	8;8;8;7;3	Tubulin-specific chaperone A	TBCA	tr|E5RIW3|E5RIW3_HUMAN Tubulin-specific chaperone A OS=Homo sapiens GN=TBCA PE=1 SV=1;tr|E5RJD8|E5RJD8_HUMAN Tubulin-specific chaperone A OS=Homo sapiens GN=TBCA PE=1 SV=1;sp|O75347|TBCA_HUMAN Tubulin-specific chaperone A OS=Homo sapiens GN=TBCA PE=1 SV=3;	5	8	8	8	8	8	8	8	8	8	8	8	8	8	8	8	8	8	8	8	8	8	57.1	57.1	57.1	10.08	84	84;119;108;131;79	0	69.967	By MS/MS	By MS/MS	By MS/MS	By MS/MS	By MS/MS	By MS/MS	57.1	57.1	57.1	57.1	57.1	57.1
E7ERS3;Q86VM9;H3BRH3;H3BRN6;H3BP01;H3BPD0	E7ERS3;Q86VM9	8;8;3;2;2;1	8;8;3;2;2;1	8;8;3;2;2;1	Zinc finger CCCH domain-containing protein 18	ZC3H18	tr|E7ERS3|E7ERS3_HUMAN Zinc finger CCCH domain-containing protein 18 OS=Homo sapiens GN=ZC3H18 PE=1 SV=1;sp|Q86VM9|ZCH18_HUMAN Zinc finger CCCH domain-containing protein 18 OS=Homo sapiens GN=ZC3H18 PE=1 SV=2	6	8	8	8	8	7	8	7	8	8	8	7	8	7	8	8	8	7	8	7	8	8	10.2	10.2	10.2	108.94	977	977;953;196;75;238;197	0	55.75	By MS/MS	By MS/MS	By MS/MS	By MS/MS	By MS/MS	By MS/MS	10.2	9.4	10.2	9.4	10.2	10.2
E9PBS1;P22234;D6RF62	E9PBS1;P22234	8;8;3	8;8;3	8;8;3	Multifunctional protein ADE2;Phosphoribosylaminoimidazole-succinocarboxamide synthase;Phosphoribosylaminoimidazole carboxylase	PAICS	tr|E9PBS1|E9PBS1_HUMAN Multifunctional protein ADE2 (Fragment) OS=Homo sapiens GN=PAICS PE=1 SV=1;sp|P22234|PUR6_HUMAN Multifunctional protein ADE2 OS=Homo sapiens GN=PAICS PE=1 SV=3	3	8	8	8	4	3	6	7	6	7	4	3	6	7	6	7	4	3	6	7	6	7	15.7	15.7	15.7	45.651	413	413;425;333	0	63.18	By MS/MS	By MS/MS	By MS/MS	By MS/MS	By MS/MS	By MS/MS	11.1	7.7	11.1	13.1	13.1	15.7
J3QL05;J3KP15;Q01130	J3QL05;J3KP15;Q01130	11;11;11	11;11;11	8;8;8	Serine/arginine-rich splicing factor 2	SRSF2	tr|J3QL05|J3QL05_HUMAN Serine/arginine-rich-splicing factor 2 (Fragment) OS=Homo sapiens GN=SRSF2 PE=1 SV=1;tr|J3KP15|J3KP15_HUMAN Serine/arginine-rich-splicing factor 2 (Fragment) OS=Homo sapiens GN=SRSF2 PE=1 SV=7;sp|Q01130|SRSF2_HUMAN Serine/arginine-ri	3	11	11	8	10	11	11	10	10	9	10	11	11	10	10	9	7	8	8	7	7	6	68.5	68.5	60	15.156	130	130;134;221	0	107.91	By MS/MS	By MS/MS	By MS/MS	By MS/MS	By MS/MS	By MS/MS	60	68.5	68.5	60	60	46.9
P00492	P00492	8	8	8	Hypoxanthine-guanine phosphoribosyltransferase	HPRT1	sp|P00492|HPRT_HUMAN Hypoxanthine-guanine phosphoribosyltransferase OS=Homo sapiens GN=HPRT1 PE=1 SV=2	1	8	8	8	5	1	4	7	6	4	5	1	4	7	6	4	5	1	4	7	6	4	45	45	45	24.579	218	218	0	52.566	By MS/MS	By matching	By matching	By MS/MS	By MS/MS	By MS/MS	28.4	4.6	22	39.9	32.6	21.1
P00918;E5RID5;E5RK37	P00918	8;3;3	8;3;3	8;3;3	Carbonic anhydrase 2	CA2	sp|P00918|CAH2_HUMAN Carbonic anhydrase 2 OS=Homo sapiens GN=CA2 PE=1 SV=2	3	8	8	8	7	5	7	8	8	6	7	5	7	8	8	6	7	5	7	8	8	6	39.6	39.6	39.6	29.246	260	260;97;101	0	62.847	By MS/MS	By MS/MS	By MS/MS	By MS/MS	By MS/MS	By MS/MS	35	22.7	35	39.6	39.6	31.2
P05455;E7ERC4;E9PGX9;E9PFL9	P05455;E7ERC4	8;4;3;3	8;4;3;3	8;4;3;3	Lupus La protein	SSB	sp|P05455|LA_HUMAN Lupus La protein OS=Homo sapiens GN=SSB PE=1 SV=2;tr|E7ERC4|E7ERC4_HUMAN Lupus La protein (Fragment) OS=Homo sapiens GN=SSB PE=1 SV=1	4	8	8	8	4	2	7	8	8	8	4	2	7	8	8	8	4	2	7	8	8	8	18.1	18.1	18.1	46.836	408	408;184;120;134	0	69.816	By matching	By matching	By MS/MS	By MS/MS	By MS/MS	By MS/MS	11.8	5.1	18.1	18.1	18.1	18.1
P17480	P17480	88	88	8	Nucleolar transcription factor 1	UBTF	sp|P17480|UBF1_HUMAN Nucleolar transcription factor 1 OS=Homo sapiens GN=UBTF PE=1 SV=1	1	88	88	8	86	85	87	77	85	79	86	85	87	77	85	79	7	7	7	5	8	4	72.5	72.5	6.2	89.405	764	764	0	323.31	By MS/MS	By MS/MS	By MS/MS	By MS/MS	By MS/MS	By MS/MS	71.7	69.5	72.5	67	71.2	70.3
P22314;Q5JRR6;Q5JRR9;Q5JRS0	P22314;Q5JRR6	8;4;1;1	8;4;1;1	8;4;1;1	Ubiquitin-like modifier-activating enzyme 1	UBA1	sp|P22314|UBA1_HUMAN Ubiquitin-like modifier-activating enzyme 1 OS=Homo sapiens GN=UBA1 PE=1 SV=3;tr|Q5JRR6|Q5JRR6_HUMAN Ubiquitin-like modifier-activating enzyme 1 OS=Homo sapiens GN=UBA1 PE=1 SV=1	4	8	8	8	6	5	5	7	7	8	6	5	5	7	7	8	6	5	5	7	7	8	11.3	11.3	11.3	117.85	1058	1058;506;271;284	0	53.969	By matching	By matching	By matching	By MS/MS	By MS/MS	By MS/MS	7.9	6.5	6.9	10.1	9.6	11.3
P23528;G3V1A4;E9PP50;E9PK25;E9PLJ3;E9PS23;E9PQB7;Q9Y281	P23528;G3V1A4;E9PP50;E9PK25;E9PLJ3;E9PS23;E9PQB7	8;7;7;7;4;4;4;1	8;7;7;7;4;4;4;1	8;7;7;7;4;4;4;1	Cofilin-1	CFL1	sp|P23528|COF1_HUMAN Cofilin-1 OS=Homo sapiens GN=CFL1 PE=1 SV=3;tr|G3V1A4|G3V1A4_HUMAN Cofilin 1 (Non-muscle), isoform CRA_a OS=Homo sapiens GN=CFL1 PE=1 SV=1;tr|E9PP50|E9PP50_HUMAN Cofilin-1 (Fragment) OS=Homo sapiens GN=CFL1 PE=1 SV=7;tr|E9PK25|E9PK25_H	8	8	8	8	6	6	7	8	8	5	6	6	7	8	8	5	6	6	7	8	8	5	51.2	51.2	51.2	18.502	166	166;149;160;204;79;91;122;166	0	66.981	By MS/MS	By MS/MS	By MS/MS	By MS/MS	By MS/MS	By MS/MS	48.2	48.2	51.2	51.2	51.2	32.5
P26640;A0A140T936;A0A140T954;A2ABF4;A0A0G2JJT9	P26640;A0A140T936	8;6;3;2;2	8;6;3;2;2	8;6;3;2;2	Valine--tRNA ligase	VARS	sp|P26640|SYVC_HUMAN Valine--tRNA ligase OS=Homo sapiens GN=VARS PE=1 SV=4;tr|A0A140T936|A0A140T936_HUMAN Valine--tRNA ligase (Fragment) OS=Homo sapiens GN=VARS PE=1 SV=1	5	8	8	8	4	5	6	5	8	6	4	5	6	5	8	6	4	5	6	5	8	6	8.2	8.2	8.2	140.47	1264	1264;1183;366;174;174	0	57.69	By MS/MS	By MS/MS	By MS/MS	By MS/MS	By MS/MS	By MS/MS	4.3	5.5	6.4	5	8.2	5.9
P42766;F2Z388	P42766;F2Z388	8;7	8;7	8;7	60S ribosomal protein L35	RPL35	sp|P42766|RL35_HUMAN 60S ribosomal protein L35 OS=Homo sapiens GN=RPL35 PE=1 SV=2;tr|F2Z388|F2Z388_HUMAN 60S ribosomal protein L35 OS=Homo sapiens GN=RPL35 PE=1 SV=1	2	8	8	8	7	6	8	7	8	7	7	6	8	7	8	7	7	6	8	7	8	7	41.5	41.5	41.5	14.551	123	123;96	0	144.05	By MS/MS	By MS/MS	By MS/MS	By MS/MS	By MS/MS	By MS/MS	41.5	41.5	41.5	41.5	41.5	41.5
P50502;Q3KNR6;Q8NFI4;H7C3I1;A0A087X1H6;F6VDH7;Q8IZP2;F8WAQ7	P50502;Q3KNR6;Q8NFI4;H7C3I1;A0A087X1H6;F6VDH7;Q8IZP2	8;7;7;5;5;4;4;2	8;7;7;5;5;4;4;2	8;7;7;5;5;4;4;2	Hsc70-interacting protein;Putative protein FAM10A5;Putative protein FAM10A4	ST13;ST13P5;ST13P4	sp|P50502|F10A1_HUMAN Hsc70-interacting protein OS=Homo sapiens GN=ST13 PE=1 SV=2;tr|Q3KNR6|Q3KNR6_HUMAN Hsc70-interacting protein OS=Homo sapiens GN=ST13 PE=1 SV=1;sp|Q8NFI4|F10A5_HUMAN Putative protein FAM10A5 OS=Homo sapiens GN=ST13P5 PE=5 SV=1;tr|H7C3I	8	8	8	8	6	6	6	8	8	8	6	6	6	8	8	8	6	6	6	8	8	8	21.7	21.7	21.7	41.331	369	369;211;369;146;254;162;240;38	0	56.919	By MS/MS	By MS/MS	By MS/MS	By MS/MS	By MS/MS	By MS/MS	16	16	16	21.7	21.7	21.7
P50991	P50991	8	8	8	T-complex protein 1 subunit delta	CCT4	sp|P50991|TCPD_HUMAN T-complex protein 1 subunit delta OS=Homo sapiens GN=CCT4 PE=1 SV=4	1	8	8	8	1	3	6	6	6	7	1	3	6	6	6	7	1	3	6	6	6	7	17.6	17.6	17.6	57.924	539	539	0	61.102	By matching	By matching	By MS/MS	By MS/MS	By MS/MS	By MS/MS	2.2	6.7	13.7	14.3	13.7	15.8
P54577;A0A0C4DGZ5	P54577	8;2	8;2	8;2	Tyrosine--tRNA ligase, cytoplasmic;Tyrosine--tRNA ligase, cytoplasmic, N-terminally processed	YARS	sp|P54577|SYYC_HUMAN Tyrosine--tRNA ligase, cytoplasmic OS=Homo sapiens GN=YARS PE=1 SV=4	2	8	8	8	3	5	5	7	6	3	3	5	5	7	6	3	3	5	5	7	6	3	17.4	17.4	17.4	59.143	528	528;388	0	52.031	By MS/MS	By matching	By MS/MS	By MS/MS	By MS/MS	By MS/MS	7	10.8	11	15.2	13.4	6.8
P61313;E7EX53;E7EQV9;E7ENU7;E7ERA2	P61313;E7EX53;E7EQV9;E7ENU7	8;7;7;6;2	8;7;7;6;2	8;7;7;6;2	60S ribosomal protein L15;Ribosomal protein L15	RPL15	sp|P61313|RL15_HUMAN 60S ribosomal protein L15 OS=Homo sapiens GN=RPL15 PE=1 SV=2;tr|E7EX53|E7EX53_HUMAN Ribosomal protein L15 (Fragment) OS=Homo sapiens GN=RPL15 PE=1 SV=1;tr|E7EQV9|E7EQV9_HUMAN Ribosomal protein L15 (Fragment) OS=Homo sapiens GN=RPL15 PE	5	8	8	8	6	6	8	8	8	7	6	6	8	8	8	7	6	6	8	8	8	7	32.8	32.8	32.8	24.146	204	204;133;174;175;59	0	69.835	By MS/MS	By MS/MS	By MS/MS	By MS/MS	By MS/MS	By MS/MS	27.9	22.5	32.8	32.8	32.8	29.4
P62805	P62805	8	8	8	Histone H4	HIST1H4A	sp|P62805|H4_HUMAN Histone H4 OS=Homo sapiens GN=HIST1H4A PE=1 SV=2	1	8	8	8	6	7	6	8	8	7	6	7	6	8	8	7	6	7	6	8	8	7	59.2	59.2	59.2	11.367	103	103	0	61.031	By MS/MS	By MS/MS	By MS/MS	By MS/MS	By MS/MS	By MS/MS	58.3	59.2	58.3	59.2	59.2	58.3
P62993;J3KT38;J3QRL5;J3QLF6	P62993;J3KT38	8;4;3;1	8;4;3;1	8;4;3;1	Growth factor receptor-bound protein 2	GRB2	sp|P62993|GRB2_HUMAN Growth factor receptor-bound protein 2 OS=Homo sapiens GN=GRB2 PE=1 SV=1;tr|J3KT38|J3KT38_HUMAN Growth factor receptor-bound protein 2 (Fragment) OS=Homo sapiens GN=GRB2 PE=1 SV=7	4	8	8	8	5	6	7	7	6	7	5	6	7	7	6	7	5	6	7	7	6	7	39.2	39.2	39.2	25.206	217	217;111;156;42	0	52.217	By MS/MS	By MS/MS	By MS/MS	By MS/MS	By MS/MS	By MS/MS	27.2	31.3	35.9	34.6	31.3	35.9
P62995;H7BXF3;H7C2L4	P62995;H7BXF3	10;7;2	10;7;2	8;5;2	Transformer-2 protein homolog beta	TRA2B	sp|P62995|TRA2B_HUMAN Transformer-2 protein homolog beta OS=Homo sapiens GN=TRA2B PE=1 SV=1;tr|H7BXF3|H7BXF3_HUMAN Transformer-2 protein homolog beta (Fragment) OS=Homo sapiens GN=TRA2B PE=1 SV=1	3	10	10	8	9	9	8	8	9	9	9	9	8	8	9	9	7	7	6	6	7	7	29.5	29.5	29.5	33.665	288	288;127;107	0	89.198	By MS/MS	By MS/MS	By MS/MS	By MS/MS	By MS/MS	By MS/MS	29.2	29.2	26	26	29.2	26.4
Q00688;G3V5F2	Q00688	8;1	8;1	8;1	Peptidyl-prolyl cis-trans isomerase FKBP3	FKBP3	sp|Q00688|FKBP3_HUMAN Peptidyl-prolyl cis-trans isomerase FKBP3 OS=Homo sapiens GN=FKBP3 PE=1 SV=1	2	8	8	8	4	6	7	7	6	6	4	6	7	7	6	6	4	6	7	7	6	6	34.8	34.8	34.8	25.177	224	224;65	0	57.798	By MS/MS	By MS/MS	By MS/MS	By MS/MS	By MS/MS	By MS/MS	17.9	26.3	29.9	31.2	26.3	31.2
Q08211	Q08211	8	8	8	ATP-dependent RNA helicase A	DHX9	sp|Q08211|DHX9_HUMAN ATP-dependent RNA helicase A OS=Homo sapiens GN=DHX9 PE=1 SV=4	1	8	8	8	6	4	4	5	6	1	6	4	4	5	6	1	6	4	4	5	6	1	7.8	7.8	7.8	140.96	1270	1270	0	47.904	By MS/MS	By matching	By MS/MS	By MS/MS	By MS/MS	By MS/MS	6.8	4.3	4.3	4.7	4.8	0.6
Q13283;E5RIF8;E5RH42;E5RJU8;E5RI46;E5RIZ6;E5RH00;D6R9X5;D6R9A4;D6RBM9;D6REX8;D6RBR0	Q13283;E5RIF8;E5RH42;E5RJU8	9;5;5;5;4;4;2;1;1;1;1;1	9;5;5;5;4;4;2;1;1;1;1;1	8;4;4;4;3;3;1;0;0;0;0;0	Ras GTPase-activating protein-binding protein 1	G3BP1	sp|Q13283|G3BP1_HUMAN Ras GTPase-activating protein-binding protein 1 OS=Homo sapiens GN=G3BP1 PE=1 SV=1;tr|E5RIF8|E5RIF8_HUMAN Ras GTPase-activating protein-binding protein 1 (Fragment) OS=Homo sapiens GN=G3BP1 PE=1 SV=1;tr|E5RH42|E5RH42_HUMAN Ras GTPase-	12	9	9	8	7	7	7	7	8	6	7	7	7	7	8	6	7	6	6	6	7	5	31.1	31.1	28.5	52.164	466	466;106;117;153;105;148;37;56;59;78;99;102	0	72.298	By MS/MS	By MS/MS	By MS/MS	By MS/MS	By MS/MS	By MS/MS	23.8	24.2	23	20.4	25.1	17.2
Q13595	Q13595	10	8	8	Transformer-2 protein homolog alpha	TRA2A	sp|Q13595|TRA2A_HUMAN Transformer-2 protein homolog alpha OS=Homo sapiens GN=TRA2A PE=1 SV=1	1	10	8	8	9	8	9	8	9	9	7	6	7	6	7	7	7	6	7	6	7	7	35.1	31.9	31.9	32.688	282	282	0	70.349	By MS/MS	By MS/MS	By MS/MS	By MS/MS	By MS/MS	By MS/MS	35.1	35.1	35.1	34.8	35.1	34.8
Q14151	Q14151	12	12	8	Scaffold attachment factor B2	SAFB2	sp|Q14151|SAFB2_HUMAN Scaffold attachment factor B2 OS=Homo sapiens GN=SAFB2 PE=1 SV=1	1	12	12	8	10	12	12	9	11	10	10	12	12	9	11	10	6	8	8	7	7	8	15	15	10.2	107.47	953	953	0	82.385	By MS/MS	By MS/MS	By MS/MS	By MS/MS	By MS/MS	By MS/MS	12.5	15	15	10.9	13.5	12.4
Q32Q12;P22392;J3KPD9;E7ERL0;O60361;P15531;F6XY72;E5RHP0;C9K028	Q32Q12;P22392;J3KPD9;E7ERL0;O60361;P15531	8;7;6;5;5;5;3;3;2	8;7;6;5;5;5;3;3;2	8;7;6;5;5;5;3;3;2	Nucleoside diphosphate kinase;Nucleoside diphosphate kinase B;Putative nucleoside diphosphate kinase;Nucleoside diphosphate kinase A	NME1-NME2;NME2;NME1;NME2P1	tr|Q32Q12|Q32Q12_HUMAN Nucleoside diphosphate kinase OS=Homo sapiens GN=NME1-NME2 PE=1 SV=1;sp|P22392|NDKB_HUMAN Nucleoside diphosphate kinase B OS=Homo sapiens GN=NME2 PE=1 SV=1;tr|J3KPD9|J3KPD9_HUMAN Protein NME1-NME2 OS=Homo sapiens GN=NME1-NME2 PE=1 SV	9	8	8	8	7	7	8	8	8	8	7	7	8	8	8	8	7	7	8	8	8	8	45.5	45.5	45.5	32.642	292	292;152;197;139;137;152;82;82;60	0	60.261	By MS/MS	By MS/MS	By MS/MS	By MS/MS	By MS/MS	By MS/MS	42.1	42.1	45.5	45.5	45.5	45.5
Q96RQ3;G5E9X5;E9PG35;E9PHF7;F5GYT8;F8WDI3	Q96RQ3;G5E9X5;E9PG35;E9PHF7;F5GYT8	8;7;7;7;6;1	8;7;7;7;6;1	8;7;7;7;6;1	Methylcrotonoyl-CoA carboxylase subunit alpha, mitochondrial	MCCC1	sp|Q96RQ3|MCCA_HUMAN Methylcrotonoyl-CoA carboxylase subunit alpha, mitochondrial OS=Homo sapiens GN=MCCC1 PE=1 SV=3;tr|G5E9X5|G5E9X5_HUMAN Methylcrotonoyl-CoA carboxylase subunit alpha, mitochondrial OS=Homo sapiens GN=MCCC1 PE=1 SV=1;tr|E9PG35|E9PG35_HUM	6	8	8	8	6	7	7	7	8	7	6	7	7	7	8	7	6	7	7	7	8	7	15	15	15	80.472	725	725;434;598;616;575;112	0	50.652	By MS/MS	By MS/MS	By MS/MS	By MS/MS	By MS/MS	By MS/MS	10.9	12.6	12.6	12.6	15	13.2
Q9NX58;D6RDJ1	Q9NX58;D6RDJ1	8;4	8;4	8;4	Cell growth-regulating nucleolar protein	LYAR	sp|Q9NX58|LYAR_HUMAN Cell growth-regulating nucleolar protein OS=Homo sapiens GN=LYAR PE=1 SV=2;tr|D6RDJ1|D6RDJ1_HUMAN Cell growth-regulating nucleolar protein (Fragment) OS=Homo sapiens GN=LYAR PE=1 SV=1	2	8	8	8	5	5	8	8	7	4	5	5	8	8	7	4	5	5	8	8	7	4	26.6	26.6	26.6	43.614	379	379;79	0	56.768	By MS/MS	By matching	By MS/MS	By MS/MS	By MS/MS	By MS/MS	16.6	20.1	26.6	26.6	26.4	16.1
Q9Y266;A0A0A0MSS4;A0A0A0MSU9	Q9Y266	8;2;2	8;2;2	8;2;2	Nuclear migration protein nudC	NUDC	sp|Q9Y266|NUDC_HUMAN Nuclear migration protein nudC OS=Homo sapiens GN=NUDC PE=1 SV=1	3	8	8	8	7	4	4	6	6	6	7	4	4	6	6	6	7	4	4	6	6	6	26.3	26.3	26.3	38.242	331	331;133;186	0	78.435	By MS/MS	By MS/MS	By MS/MS	By MS/MS	By MS/MS	By MS/MS	23.9	14.2	14.5	20.5	19.3	20.2
Q9Y3I0	Q9Y3I0	8	8	8	tRNA-splicing ligase RtcB homolog	RTCB	sp|Q9Y3I0|RTCB_HUMAN tRNA-splicing ligase RtcB homolog OS=Homo sapiens GN=RTCB PE=1 SV=1	1	8	8	8	7	6	7	8	7	7	7	6	7	8	7	7	7	6	7	8	7	7	19	19	19	55.21	505	505	0	60.809	By MS/MS	By matching	By MS/MS	By MS/MS	By MS/MS	By MS/MS	16.2	12.9	16.2	19	15.6	17.4
A0A087X0X3;P52272;M0R2I7;M0R019;M0QY96;M0R2T0;M0R0Y6;M0QYQ7;M0R0N3;M0QYL3	A0A087X0X3;P52272;M0R2I7	15;15;8;6;4;4;2;2;2;1	15;15;8;6;4;4;2;2;2;1	7;7;2;5;2;3;2;2;2;0	Heterogeneous nuclear ribonucleoprotein M	HNRNPM	tr|A0A087X0X3|A0A087X0X3_HUMAN Heterogeneous nuclear ribonucleoprotein M OS=Homo sapiens GN=HNRNPM PE=1 SV=1;sp|P52272|HNRPM_HUMAN Heterogeneous nuclear ribonucleoprotein M OS=Homo sapiens GN=HNRNPM PE=1 SV=3;tr|M0R2I7|M0R2I7_HUMAN Heterogeneous nuclear ri	10	15	15	7	4	6	12	14	14	12	4	6	12	14	14	12	2	1	4	6	6	5	25.1	25.1	12.9	77.569	730	730;730;214;353;116;357;99;219;276;99	0	98.943	By MS/MS	By matching	By MS/MS	By MS/MS	By MS/MS	By MS/MS	9.2	11.2	21.8	23.8	22.9	22.3
C9J9K3;A0A0C4DG17;P08865;F8WD59	C9J9K3;A0A0C4DG17;P08865	7;7;7;3	7;7;7;3	7;7;7;3	40S ribosomal protein SA	RPSA	tr|C9J9K3|C9J9K3_HUMAN 40S ribosomal protein SA (Fragment) OS=Homo sapiens GN=RPSA PE=1 SV=7;tr|A0A0C4DG17|A0A0C4DG17_HUMAN 40S ribosomal protein SA OS=Homo sapiens GN=RPSA PE=1 SV=1;sp|P08865|RSSA_HUMAN 40S ribosomal protein SA OS=Homo sapiens GN=RPSA PE=	4	7	7	7	6	5	3	6	7	6	6	5	3	6	7	6	6	5	3	6	7	6	29.2	29.2	29.2	29.505	264	264;300;295;116	0	52.665	By MS/MS	By MS/MS	By MS/MS	By MS/MS	By MS/MS	By MS/MS	25	18.6	13.6	28	29.2	25
A9Z1X7;Q8IYB3;E9PCT1;M0R088;M0R1E7	A9Z1X7;Q8IYB3;E9PCT1	7;7;6;2;1	7;7;6;2;1	7;7;6;2;1	Serine/arginine repetitive matrix protein 1	SRRM1	tr|A9Z1X7|A9Z1X7_HUMAN Serine/arginine repetitive matrix protein 1 OS=Homo sapiens GN=SRRM1 PE=1 SV=1;sp|Q8IYB3|SRRM1_HUMAN Serine/arginine repetitive matrix protein 1 OS=Homo sapiens GN=SRRM1 PE=1 SV=2;tr|E9PCT1|E9PCT1_HUMAN Serine/arginine repetitive mat	5	7	7	7	7	6	6	7	6	7	7	6	6	7	6	7	7	6	6	7	6	7	9.5	9.5	9.5	103.39	913	913;904;820;681;79	0	49.295	By MS/MS	By MS/MS	By MS/MS	By MS/MS	By MS/MS	By MS/MS	9.5	8.3	8.3	9.5	8.3	9.5
B9A041;P40925;B8ZZ51;C9JF79;C9JRL4	B9A041;P40925;B8ZZ51;C9JF79	7;7;5;4;2	7;7;5;4;2	7;7;5;4;2	Malate dehydrogenase, cytoplasmic;Malate dehydrogenase	MDH1	tr|B9A041|B9A041_HUMAN Malate dehydrogenase, cytoplasmic OS=Homo sapiens GN=MDH1 PE=1 SV=1;sp|P40925|MDHC_HUMAN Malate dehydrogenase, cytoplasmic OS=Homo sapiens GN=MDH1 PE=1 SV=4;tr|B8ZZ51|B8ZZ51_HUMAN Malate dehydrogenase, cytoplasmic OS=Homo sapiens GN=	5	7	7	7	5	3	6	6	7	6	5	3	6	6	7	6	5	3	6	6	7	6	40.5	40.5	40.5	23.038	210	210;334;169;222;120	0	61.734	By matching	By matching	By MS/MS	By MS/MS	By MS/MS	By MS/MS	32.4	17.1	36.2	36.2	40.5	36.2
CON__P13645;P13645;CON__P02535-1;CON__Q148H6;CON__Q7Z3Y7;Q7Z3Y7;CON__Q7Z3Z0;CON__Q7Z3Y8;Q7Z3Z0;Q7Z3Y8	CON__P13645;P13645	9;9;4;3;3;3;2;2;2;2	8;8;3;2;2;2;2;2;2;2	7;7;2;1;1;1;1;1;1;1	Keratin, type I cytoskeletal 10	KRT10	;sp|P13645|K1C10_HUMAN Keratin, type I cytoskeletal 10 OS=Homo sapiens GN=KRT10 PE=1 SV=6	10	9	8	7	7	5	9	9	9	6	6	4	8	8	8	5	6	3	7	7	7	4	15.7	14.5	13	59.51	593	593;584;570;464;486;464;450;459;450;459	0	69.761	By MS/MS	By MS/MS	By MS/MS	By MS/MS	By MS/MS	By MS/MS	12.6	7.4	15.7	15.7	15.7	9.9
CON__Streptavidin	CON__Streptavidin	7	7	7				1	7	7	7	5	7	7	6	7	7	5	7	7	6	7	7	5	7	7	6	7	7	45.6	45.6	45.6	16.622	160	160	0	323.31	By MS/MS	By MS/MS	By MS/MS	By MS/MS	By MS/MS	By MS/MS	45.6	45.6	45.6	45.6	45.6	45.6
E5RIT6;Q9UNX3;P61254;J3QRI7;J3QQQ9;J3QQV1;J3QRC4;J3KTJ8;J3KS10;E5RHH1;J3KSS0	E5RIT6;Q9UNX3;P61254;J3QRI7;J3QQQ9;J3QQV1;J3QRC4;J3KTJ8	7;7;7;6;6;6;5;4;3;2;2	7;7;7;6;6;6;5;4;3;2;2	7;7;7;6;6;6;5;4;3;2;2	60S ribosomal protein L26-like 1;60S ribosomal protein L26	RPL26L1;RPL26	tr|E5RIT6|E5RIT6_HUMAN 60S ribosomal protein L26-like 1 (Fragment) OS=Homo sapiens GN=RPL26L1 PE=1 SV=1;sp|Q9UNX3|RL26L_HUMAN 60S ribosomal protein L26-like 1 OS=Homo sapiens GN=RPL26L1 PE=1 SV=1;sp|P61254|RL26_HUMAN 60S ribosomal protein L26 OS=Homo sapie	11	7	7	7	4	7	7	7	7	7	4	7	7	7	7	7	4	7	7	7	7	7	43	43	43	15.207	128	128;145;145;107;107;110;135;97;63;39;63	0	50.276	By MS/MS	By MS/MS	By MS/MS	By MS/MS	By MS/MS	By MS/MS	26.6	43	43	43	43	43
E5RJU9;Q86UE4;H0YB56;H0YBE0	E5RJU9;Q86UE4;H0YB56	7;7;4;1	7;7;4;1	7;7;4;1	Protein LYRIC	MTDH	tr|E5RJU9|E5RJU9_HUMAN Protein LYRIC OS=Homo sapiens GN=MTDH PE=1 SV=1;sp|Q86UE4|LYRIC_HUMAN Protein LYRIC OS=Homo sapiens GN=MTDH PE=1 SV=2;tr|H0YB56|H0YB56_HUMAN Protein LYRIC (Fragment) OS=Homo sapiens GN=MTDH PE=1 SV=1	4	7	7	7	7	7	7	6	7	5	7	7	7	6	7	5	7	7	7	6	7	5	17.1	17.1	17.1	57.521	526	526;582;224;60	0	53.141	By MS/MS	By MS/MS	By MS/MS	By MS/MS	By MS/MS	By MS/MS	17.1	17.1	17.1	14.6	17.1	11.2
E9PJD9;P46776;E9PLX7;E9PLL6	E9PJD9;P46776;E9PLX7;E9PLL6	7;7;5;4	7;7;5;4	7;7;5;4	60S ribosomal protein L27a	RPL27A	tr|E9PJD9|E9PJD9_HUMAN 60S ribosomal protein L27a OS=Homo sapiens GN=RPL27A PE=1 SV=1;sp|P46776|RL27A_HUMAN 60S ribosomal protein L27a OS=Homo sapiens GN=RPL27A PE=1 SV=2;tr|E9PLX7|E9PLX7_HUMAN 60S ribosomal protein L27a OS=Homo sapiens GN=RPL27A PE=1 SV=1	4	7	7	7	5	6	7	7	7	6	5	6	7	7	7	6	5	6	7	7	7	6	73.6	73.6	73.6	10.127	91	91;148;113;108	0	49.869	By MS/MS	By MS/MS	By MS/MS	By MS/MS	By MS/MS	By MS/MS	51.6	61.5	73.6	73.6	73.6	60.4
E9PPU1;H0YEU2;E9PL09;P23396;E9PQ96;E9PSF4;E9PJH4;F2Z2S8;H0YF32;E9PK82;H0YCJ7;H0YES8;E9PQX2	E9PPU1;H0YEU2;E9PL09;P23396	7;7;7;7;3;3;3;3;3;3;3;1;1	7;7;7;7;3;3;3;3;3;3;3;1;1	7;7;7;7;3;3;3;3;3;3;3;1;1	40S ribosomal protein S3	RPS3	tr|E9PPU1|E9PPU1_HUMAN 40S ribosomal protein S3 OS=Homo sapiens GN=RPS3 PE=1 SV=1;tr|H0YEU2|H0YEU2_HUMAN 40S ribosomal protein S3 (Fragment) OS=Homo sapiens GN=RPS3 PE=1 SV=1;tr|E9PL09|E9PL09_HUMAN 40S ribosomal protein S3 OS=Homo sapiens GN=RPS3 PE=1 SV=1	13	7	7	7	6	4	5	6	7	7	6	4	5	6	7	7	6	4	5	6	7	7	55.1	55.1	55.1	17.407	158	158;171;231;243;91;103;115;117;123;128;135;33;44	0	51.562	By MS/MS	By MS/MS	By MS/MS	By MS/MS	By MS/MS	By MS/MS	44.3	32.9	38.6	46.8	55.1	55.1
F8W1A4;P54819;F8VZG5;G3V213;F8VY04;F8VPP1	F8W1A4;P54819;F8VZG5;G3V213;F8VY04	7;7;6;5;5;1	7;7;6;5;5;1	7;7;6;5;5;1	Adenylate kinase 2, mitochondrial;Adenylate kinase 2, mitochondrial;Adenylate kinase 2, mitochondrial, N-terminally processed	AK2	tr|F8W1A4|F8W1A4_HUMAN Adenylate kinase 2, mitochondrial OS=Homo sapiens GN=AK2 PE=1 SV=1;sp|P54819|KAD2_HUMAN Adenylate kinase 2, mitochondrial OS=Homo sapiens GN=AK2 PE=1 SV=2;tr|F8VZG5|F8VZG5_HUMAN Adenylate kinase 2, mitochondrial OS=Homo sapiens GN=AK	6	7	7	7	3	4	7	7	7	5	3	4	7	7	7	5	3	4	7	7	7	5	39.7	39.7	39.7	25.63	232	232;239;162;133;190;42	0	51.284	By matching	By MS/MS	By MS/MS	By MS/MS	By MS/MS	By MS/MS	17.2	24.1	39.7	39.7	39.7	30.6
M0R0F0;M0R0R2;P46782;M0QZN2	M0R0F0;M0R0R2;P46782;M0QZN2	7;7;7;4	7;7;7;4	7;7;7;4	40S ribosomal protein S5;40S ribosomal protein S5, N-terminally processed	RPS5	tr|M0R0F0|M0R0F0_HUMAN 40S ribosomal protein S5 (Fragment) OS=Homo sapiens GN=RPS5 PE=1 SV=1;tr|M0R0R2|M0R0R2_HUMAN 40S ribosomal protein S5 OS=Homo sapiens GN=RPS5 PE=1 SV=1;sp|P46782|RS5_HUMAN 40S ribosomal protein S5 OS=Homo sapiens GN=RPS5 PE=1 SV=4;tr	4	7	7	7	7	4	7	7	7	7	7	4	7	7	7	7	7	4	7	7	7	7	38.5	38.5	38.5	22.391	200	200;225;204;134	0	49.012	By MS/MS	By MS/MS	By MS/MS	By MS/MS	By MS/MS	By MS/MS	38.5	25	38.5	38.5	38.5	38.5
O00459;E9PFP1	O00459;E9PFP1	8;4	7;4	7;4	Phosphatidylinositol 3-kinase regulatory subunit beta	PIK3R2	sp|O00459|P85B_HUMAN Phosphatidylinositol 3-kinase regulatory subunit beta OS=Homo sapiens GN=PIK3R2 PE=1 SV=2;tr|E9PFP1|E9PFP1_HUMAN Phosphatidylinositol 3-kinase regulatory subunit beta OS=Homo sapiens GN=PIK3R2 PE=1 SV=1	2	8	7	7	7	6	7	7	6	4	6	5	6	6	5	3	6	5	6	6	5	3	12.8	11.3	11.3	81.544	728	728;481	0	43.283	By MS/MS	By MS/MS	By MS/MS	By MS/MS	By MS/MS	By MS/MS	10.9	8.9	10.9	11.3	9.3	6.3
O75821;K7ER90;K7EL20;K7ENA8;K7EP16	O75821;K7ER90;K7EL20;K7ENA8	7;6;6;4;3	7;6;6;4;3	7;6;6;4;3	Eukaryotic translation initiation factor 3 subunit G	EIF3G	sp|O75821|EIF3G_HUMAN Eukaryotic translation initiation factor 3 subunit G OS=Homo sapiens GN=EIF3G PE=1 SV=2;tr|K7ER90|K7ER90_HUMAN Eukaryotic translation initiation factor 3 subunit G (Fragment) OS=Homo sapiens GN=EIF3G PE=1 SV=1;tr|K7EL20|K7EL20_HUMAN E	5	7	7	7	6	6	6	6	6	7	6	6	6	6	6	7	6	6	6	6	6	7	23.8	23.8	23.8	35.611	320	320;227;263;289;118	0	77.115	By MS/MS	By MS/MS	By MS/MS	By MS/MS	By MS/MS	By MS/MS	18.8	18.8	18.8	18.8	18.8	23.8
O95831;E9PMA0	O95831	7;1	7;1	7;1	Apoptosis-inducing factor 1, mitochondrial	AIFM1	sp|O95831|AIFM1_HUMAN Apoptosis-inducing factor 1, mitochondrial OS=Homo sapiens GN=AIFM1 PE=1 SV=1	2	7	7	7	3	2	5	6	6	5	3	2	5	6	6	5	3	2	5	6	6	5	17	17	17	66.9	613	613;274	0	45.01	By matching	By matching	By MS/MS	By MS/MS	By MS/MS	By MS/MS	8.5	5.2	12.7	14.4	13.5	10.9
P05165	P05165	7	7	7	Propionyl-CoA carboxylase alpha chain, mitochondrial	PCCA	sp|P05165|PCCA_HUMAN Propionyl-CoA carboxylase alpha chain, mitochondrial OS=Homo sapiens GN=PCCA PE=1 SV=4	1	7	7	7	6	7	7	7	7	4	6	7	7	7	7	4	6	7	7	7	7	4	13.6	13.6	13.6	80.058	728	728	0	47.656	By MS/MS	By MS/MS	By MS/MS	By MS/MS	By MS/MS	By matching	12.2	13.6	13.6	13.6	13.6	8
P0DN76;Q01081;Q8WU68;M0QYK5;M0R2N4	P0DN76;Q01081	7;7;3;2;2	7;7;3;2;2	7;7;3;2;2	Splicing factor U2AF 35 kDa subunit	U2AF1	sp|P0DN76|U2AF5_HUMAN Splicing factor U2AF 35 kDa subunit-like protein OS=Homo sapiens GN=U2AF1L5 PE=1 SV=1;sp|Q01081|U2AF1_HUMAN Splicing factor U2AF 35 kDa subunit OS=Homo sapiens GN=U2AF1 PE=1 SV=3	5	7	7	7	7	7	7	7	7	6	7	7	7	7	7	6	7	7	7	7	7	6	30	30	30	27.872	240	240;240;220;66;97	0	78.931	By MS/MS	By MS/MS	By MS/MS	By MS/MS	By MS/MS	By MS/MS	30	30	30	30	30	24.6
P10768;H7BZT7;X6RA14;U3KQT1	P10768;H7BZT7;X6RA14	7;4;4;3	7;4;4;3	7;4;4;3	S-formylglutathione hydrolase	ESD	sp|P10768|ESTD_HUMAN S-formylglutathione hydrolase OS=Homo sapiens GN=ESD PE=1 SV=2;tr|H7BZT7|H7BZT7_HUMAN S-formylglutathione hydrolase (Fragment) OS=Homo sapiens GN=ESD PE=1 SV=1;tr|X6RA14|X6RA14_HUMAN S-formylglutathione hydrolase OS=Homo sapiens GN=ESD	4	7	7	7	6	7	4	6	6	6	6	7	4	6	6	6	6	7	4	6	6	6	28.7	28.7	28.7	31.462	282	282;230;253;120	0	59.199	By MS/MS	By MS/MS	By MS/MS	By MS/MS	By MS/MS	By MS/MS	28.4	28.7	22	26.2	28.7	26.2
P14866;M0QXS5;M0QYT0;M0R076;B4DVF8;M0R1W6	P14866;M0QXS5	7;6;3;2;1;1	7;6;3;2;1;1	7;6;3;2;1;1	Heterogeneous nuclear ribonucleoprotein L	HNRNPL	sp|P14866|HNRPL_HUMAN Heterogeneous nuclear ribonucleoprotein L OS=Homo sapiens GN=HNRNPL PE=1 SV=2;tr|M0QXS5|M0QXS5_HUMAN Heterogeneous nuclear ribonucleoprotein L (Fragment) OS=Homo sapiens GN=HNRNPL PE=1 SV=1	6	7	7	7	2	2	5	7	7	7	2	2	5	7	7	7	2	2	5	7	7	7	15.4	15.4	15.4	64.132	589	589;530;321;114;179;220	0	46.07	By matching	By matching	By MS/MS	By MS/MS	By MS/MS	By MS/MS	4.4	3.6	11.2	15.4	15.4	15.4
P22626;A0A087WUI2	P22626;A0A087WUI2	7;4	7;4	7;4	Heterogeneous nuclear ribonucleoproteins A2/B1	HNRNPA2B1	sp|P22626|ROA2_HUMAN Heterogeneous nuclear ribonucleoproteins A2/B1 OS=Homo sapiens GN=HNRNPA2B1 PE=1 SV=2;tr|A0A087WUI2|A0A087WUI2_HUMAN Heterogeneous nuclear ribonucleoproteins A2/B1 OS=Homo sapiens GN=HNRNPA2B1 PE=1 SV=1	2	7	7	7	4	3	7	7	7	6	4	3	7	7	7	6	4	3	7	7	7	6	25.5	25.5	25.5	37.429	353	353;261	0	47.118	By MS/MS	By MS/MS	By MS/MS	By MS/MS	By MS/MS	By MS/MS	15.9	12.5	25.5	25.5	25.5	20.4
P25786;F5GX11;B4DEV8	P25786;F5GX11;B4DEV8	7;5;4	7;5;4	7;5;4	Proteasome subunit alpha type-1;Proteasome subunit alpha type	PSMA1	sp|P25786|PSA1_HUMAN Proteasome subunit alpha type-1 OS=Homo sapiens GN=PSMA1 PE=1 SV=1;tr|F5GX11|F5GX11_HUMAN Proteasome subunit alpha type-1 OS=Homo sapiens GN=PSMA1 PE=1 SV=1;tr|B4DEV8|B4DEV8_HUMAN Proteasome subunit alpha type OS=Homo sapiens PE=2 SV=1	3	7	7	7	4	4	5	7	7	7	4	4	5	7	7	7	4	4	5	7	7	7	29.3	29.3	29.3	29.555	263	263;238;164	0	42.091	By matching	By matching	By MS/MS	By MS/MS	By MS/MS	By MS/MS	17.9	17.9	20.9	29.3	29.3	29.3
P36915;A0A140T8Y2;A2AB27	P36915;A0A140T8Y2	7;6;1	7;6;1	7;6;1	Guanine nucleotide-binding protein-like 1	GNL1	sp|P36915|GNL1_HUMAN Guanine nucleotide-binding protein-like 1 OS=Homo sapiens GN=GNL1 PE=1 SV=2;tr|A0A140T8Y2|A0A140T8Y2_HUMAN Guanine nucleotide-binding protein-like 1 (Fragment) OS=Homo sapiens GN=GNL1 PE=1 SV=1	3	7	7	7	7	7	7	7	7	5	7	7	7	7	7	5	7	7	7	7	7	5	13.8	13.8	13.8	68.66	607	607;407;264	0	42.859	By MS/MS	By MS/MS	By MS/MS	By MS/MS	By MS/MS	By MS/MS	13.8	13.8	13.8	13.8	13.8	9.7
P40222	P40222	7	7	7	Alpha-taxilin	TXLNA	sp|P40222|TXLNA_HUMAN Alpha-taxilin OS=Homo sapiens GN=TXLNA PE=1 SV=3	1	7	7	7	6	3	7	7	5	5	6	3	7	7	5	5	6	3	7	7	5	5	15.6	15.6	15.6	61.89	546	546	0	52.182	By MS/MS	By matching	By MS/MS	By MS/MS	By MS/MS	By MS/MS	13	10.3	15.6	15.6	10.4	12.1
P53396;K7ESG8	P53396	7;2	7;2	7;2	ATP-citrate synthase	ACLY	sp|P53396|ACLY_HUMAN ATP-citrate synthase OS=Homo sapiens GN=ACLY PE=1 SV=3	2	7	7	7	4	3	4	5	6	7	4	3	4	5	6	7	4	3	4	5	6	7	8.7	8.7	8.7	120.84	1101	1101;109	0	44.43	By MS/MS	By matching	By MS/MS	By MS/MS	By MS/MS	By MS/MS	4.8	3.3	4.5	5.9	6.7	8.7
P55072;C9JUP7;C9IZA5	P55072	7;1;1	7;1;1	7;1;1	Transitional endoplasmic reticulum ATPase	VCP	sp|P55072|TERA_HUMAN Transitional endoplasmic reticulum ATPase OS=Homo sapiens GN=VCP PE=1 SV=4	3	7	7	7	4	3	5	7	7	3	4	3	5	7	7	3	4	3	5	7	7	3	9.2	9.2	9.2	89.321	806	806;115;160	0	42.804	By matching	By matching	By MS/MS	By MS/MS	By MS/MS	By matching	5.7	4.2	6	9.2	9.2	4.5
P56192;H0YIC2;H0YHL6;H0YI94;H0YI27;H0YIP0;H0YHV5	P56192	7;2;1;1;1;1;1	7;2;1;1;1;1;1	7;2;1;1;1;1;1	Methionine--tRNA ligase, cytoplasmic	MARS	sp|P56192|SYMC_HUMAN Methionine--tRNA ligase, cytoplasmic OS=Homo sapiens GN=MARS PE=1 SV=2	7	7	7	7	4	5	5	6	6	6	4	5	5	6	6	6	4	5	5	6	6	6	10.8	10.8	10.8	101.11	900	900;58;81;119;124;219;233	0	46.083	By matching	By matching	By matching	By MS/MS	By MS/MS	By MS/MS	6.7	8.3	8.3	9.2	9.2	9.9
P62263;H0YB22;E5RH77	P62263;H0YB22;E5RH77	7;5;5	7;5;5	7;5;5	40S ribosomal protein S14	RPS14	sp|P62263|RS14_HUMAN 40S ribosomal protein S14 OS=Homo sapiens GN=RPS14 PE=1 SV=3;tr|H0YB22|H0YB22_HUMAN 40S ribosomal protein S14 (Fragment) OS=Homo sapiens GN=RPS14 PE=1 SV=1;tr|E5RH77|E5RH77_HUMAN 40S ribosomal protein S14 OS=Homo sapiens GN=RPS14 PE=1	3	7	7	7	2	3	6	7	7	7	2	3	6	7	7	7	2	3	6	7	7	7	37.7	37.7	37.7	16.273	151	151;120;134	0	83.542	By MS/MS	By MS/MS	By MS/MS	By MS/MS	By MS/MS	By MS/MS	8.6	17.2	25.8	37.7	37.7	37.7
P62750;H7BY10;K7EJV9;K7ERT8;A8MUS3;K7EMA7	P62750;H7BY10;K7EJV9;K7ERT8;A8MUS3;K7EMA7	7;6;6;6;6;5	7;6;6;6;6;5	7;6;6;6;6;5	60S ribosomal protein L23a	RPL23A	sp|P62750|RL23A_HUMAN 60S ribosomal protein L23a OS=Homo sapiens GN=RPL23A PE=1 SV=1;tr|H7BY10|H7BY10_HUMAN 60S ribosomal protein L23a (Fragment) OS=Homo sapiens GN=RPL23A PE=1 SV=1;tr|K7EJV9|K7EJV9_HUMAN 60S ribosomal protein L23a (Fragment) OS=Homo sapie	6	7	7	7	6	6	7	7	7	7	6	6	7	7	7	7	6	6	7	7	7	7	41.7	41.7	41.7	17.695	156	156;158;170;175;194;70	0	57.947	By MS/MS	By MS/MS	By MS/MS	By MS/MS	By MS/MS	By MS/MS	41	41	41.7	41.7	41.7	41.7
P62851	P62851	7	7	7	40S ribosomal protein S25	RPS25	sp|P62851|RS25_HUMAN 40S ribosomal protein S25 OS=Homo sapiens GN=RPS25 PE=1 SV=1	1	7	7	7	5	7	7	7	7	7	5	7	7	7	7	7	5	7	7	7	7	7	34.4	34.4	34.4	13.742	125	125	0	64.753	By MS/MS	By MS/MS	By MS/MS	By MS/MS	By MS/MS	By MS/MS	29.6	34.4	34.4	34.4	34.4	34.4
P62906	P62906	7	7	7	60S ribosomal protein L10a	RPL10A	sp|P62906|RL10A_HUMAN 60S ribosomal protein L10a OS=Homo sapiens GN=RPL10A PE=1 SV=2	1	7	7	7	5	4	6	7	7	5	5	4	6	7	7	5	5	4	6	7	7	5	35	35	35	24.831	217	217	0	69.511	By MS/MS	By MS/MS	By MS/MS	By MS/MS	By MS/MS	By MS/MS	30.9	24.9	35	35	35	25.3
P78371;F5GWF6;F8VQ14	P78371;F5GWF6;F8VQ14	7;6;5	7;6;5	7;6;5	T-complex protein 1 subunit beta	CCT2	sp|P78371|TCPB_HUMAN T-complex protein 1 subunit beta OS=Homo sapiens GN=CCT2 PE=1 SV=4;tr|F5GWF6|F5GWF6_HUMAN T-complex protein 1 subunit beta OS=Homo sapiens GN=CCT2 PE=1 SV=2;tr|F8VQ14|F8VQ14_HUMAN T-complex protein 1 subunit beta OS=Homo sapiens GN=CCT	3	7	7	7	6	2	4	6	5	5	6	2	4	6	5	5	6	2	4	6	5	5	17.4	17.4	17.4	57.488	535	535;530;416	0	48.542	By MS/MS	By matching	By MS/MS	By MS/MS	By MS/MS	By MS/MS	15.5	5.6	10.5	15.1	13.3	12.3
Q06830;A0A0A0MSI0;A0A0A0MRQ5;H7C3T4;Q13162	Q06830;A0A0A0MSI0;A0A0A0MRQ5	8;7;6;2;2	8;7;6;2;2	7;6;5;2;2	Peroxiredoxin-1	PRDX1	sp|Q06830|PRDX1_HUMAN Peroxiredoxin-1 OS=Homo sapiens GN=PRDX1 PE=1 SV=1;tr|A0A0A0MSI0|A0A0A0MSI0_HUMAN Peroxiredoxin-1 (Fragment) OS=Homo sapiens GN=PRDX1 PE=1 SV=1;tr|A0A0A0MRQ5|A0A0A0MRQ5_HUMAN Peroxiredoxin-1 OS=Homo sapiens GN=PRDX1 PE=1 SV=1	5	8	8	7	7	6	8	8	8	8	7	6	8	8	8	8	6	6	7	7	7	7	50.8	50.8	45.2	22.11	199	199;171;97;161;271	0	84.873	By MS/MS	By MS/MS	By MS/MS	By MS/MS	By MS/MS	By MS/MS	47.2	33.2	50.8	50.8	50.8	50.8
Q15059;M0QZD9;A9J571;Q58F21	Q15059	12;4;1;1	11;3;1;1	7;0;1;0	Bromodomain-containing protein 3	BRD3	sp|Q15059|BRD3_HUMAN Bromodomain-containing protein 3 OS=Homo sapiens GN=BRD3 PE=1 SV=1	4	12	11	7	9	10	11	12	11	11	8	9	10	11	10	10	5	6	7	7	7	7	18.7	17.6	11.8	79.541	726	726;572;74;947	0	96.262	By MS/MS	By MS/MS	By MS/MS	By MS/MS	By MS/MS	By MS/MS	13.9	15.7	17.5	18.7	17.5	17.5
Q15233;C9JYS8;C9IZL7;H7C367;C9J4X2	Q15233;C9JYS8	8;4;3;3;1	8;4;3;3;1	7;4;2;2;1	Non-POU domain-containing octamer-binding protein	NONO	sp|Q15233|NONO_HUMAN Non-POU domain-containing octamer-binding protein OS=Homo sapiens GN=NONO PE=1 SV=4;tr|C9JYS8|C9JYS8_HUMAN Non-POU domain-containing octamer-binding protein (Fragment) OS=Homo sapiens GN=NONO PE=1 SV=7	5	8	8	7	7	5	7	8	8	8	7	5	7	8	8	8	6	4	7	7	7	7	21.7	21.7	20	54.231	471	471;248;207;235;124	0	57.161	By matching	By matching	By MS/MS	By MS/MS	By MS/MS	By MS/MS	19.3	14	20	21.7	21.7	21.7
Q5T200;Q5T9K0	Q5T200	7;2	7;2	7;2	Zinc finger CCCH domain-containing protein 13	ZC3H13	sp|Q5T200|ZC3HD_HUMAN Zinc finger CCCH domain-containing protein 13 OS=Homo sapiens GN=ZC3H13 PE=1 SV=1	2	7	7	7	6	7	6	6	5	5	6	7	6	6	5	5	6	7	6	6	5	5	4.8	4.8	4.8	196.63	1668	1668;115	0	45.871	By MS/MS	By MS/MS	By MS/MS	By MS/MS	By MS/MS	By MS/MS	4.1	4.8	4.1	4.1	3.6	3.6
Q7KZF4;H7C597	Q7KZF4	7;1	7;1	7;1	Staphylococcal nuclease domain-containing protein 1	SND1	sp|Q7KZF4|SND1_HUMAN Staphylococcal nuclease domain-containing protein 1 OS=Homo sapiens GN=SND1 PE=1 SV=1	2	7	7	7	4	5	6	7	7	6	4	5	6	7	7	6	4	5	6	7	7	6	10.1	10.1	10.1	102	910	910;231	0	42.544	By matching	By matching	By matching	By MS/MS	By MS/MS	By MS/MS	6.3	7.1	8.7	10.1	10.1	8.7
Q8N1G4	Q8N1G4	7	7	7	Leucine-rich repeat-containing protein 47	LRRC47	sp|Q8N1G4|LRC47_HUMAN Leucine-rich repeat-containing protein 47 OS=Homo sapiens GN=LRRC47 PE=1 SV=1	1	7	7	7	2	4	3	6	5	5	2	4	3	6	5	5	2	4	3	6	5	5	16.1	16.1	16.1	63.472	583	583	0	47.355	By MS/MS	By matching	By matching	By MS/MS	By MS/MS	By MS/MS	5.1	9.3	7.5	14.2	11.1	11.1
Q8N5F7;Q5M9Q1	Q8N5F7	7;3	7;3	7;3	NF-kappa-B-activating protein	NKAP	sp|Q8N5F7|NKAP_HUMAN NF-kappa-B-activating protein OS=Homo sapiens GN=NKAP PE=1 SV=1	2	7	7	7	7	7	7	7	7	6	7	7	7	7	7	6	7	7	7	7	7	6	19.5	19.5	19.5	47.138	415	415;402	0	104.14	By MS/MS	By MS/MS	By MS/MS	By MS/MS	By MS/MS	By MS/MS	19.5	19.5	19.5	19.5	19.5	19.5
Q96AG4	Q96AG4	7	7	7	Leucine-rich repeat-containing protein 59	LRRC59	sp|Q96AG4|LRC59_HUMAN Leucine-rich repeat-containing protein 59 OS=Homo sapiens GN=LRRC59 PE=1 SV=1	1	7	7	7	3	3	4	7	6	6	3	3	4	7	6	6	3	3	4	7	6	6	23.1	23.1	23.1	34.93	307	307	0	48.13	By matching	By matching	By matching	By MS/MS	By MS/MS	By MS/MS	10.1	10.1	13.4	23.1	20.8	20.8
Q99832;F8WAM2;F8WBP8	Q99832	8;2;1	8;2;1	7;2;0	T-complex protein 1 subunit eta	CCT7	sp|Q99832|TCPH_HUMAN T-complex protein 1 subunit eta OS=Homo sapiens GN=CCT7 PE=1 SV=2	3	8	8	7	2	3	4	7	7	7	2	3	4	7	7	7	2	3	4	7	7	7	15.7	15.7	13.8	59.366	543	543;98;83	0	48.578	By matching	By matching	By MS/MS	By MS/MS	By MS/MS	By MS/MS	5	6.3	8.1	13.8	13.8	13.8
Q9HCK8;H0YJA4	Q9HCK8;H0YJA4	7;4	7;4	7;4	Chromodomain-helicase-DNA-binding protein 8	CHD8	sp|Q9HCK8|CHD8_HUMAN Chromodomain-helicase-DNA-binding protein 8 OS=Homo sapiens GN=CHD8 PE=1 SV=5;tr|H0YJA4|H0YJA4_HUMAN Chromodomain-helicase-DNA-binding protein 8 (Fragment) OS=Homo sapiens GN=CHD8 PE=1 SV=1	2	7	7	7	5	6	6	7	6	6	5	6	6	7	6	6	5	6	6	7	6	6	5	5	5	290.52	2581	2581;226	0	39.956	By MS/MS	By MS/MS	By MS/MS	By MS/MS	By MS/MS	By MS/MS	3.4	4.3	4.3	5	4.3	4.3
Q9NWH9;H7C3F4;H7BXE3;H0YLW7;H0YMW8;H0YKH2;H0YNF3;H0YMR6;H0YLE6;H0YL55;H0YMM0	Q9NWH9;H7C3F4	7;4;3;2;2;2;2;2;2;2;1	7;4;3;2;2;2;2;2;2;2;1	7;4;3;2;2;2;2;2;2;2;1	SAFB-like transcription modulator	SLTM	sp|Q9NWH9|SLTM_HUMAN SAFB-like transcription modulator OS=Homo sapiens GN=SLTM PE=1 SV=2;tr|H7C3F4|H7C3F4_HUMAN SAFB-like transcription modulator (Fragment) OS=Homo sapiens GN=SLTM PE=1 SV=1	11	7	7	7	6	6	7	6	6	5	6	6	7	6	6	5	6	6	7	6	6	5	8.5	8.5	8.5	117.15	1034	1034;600;453;62;89;100;161;177;192;229;112	0	57.606	By MS/MS	By MS/MS	By MS/MS	By MS/MS	By MS/MS	By MS/MS	8.5	8.5	8.5	8.4	7.4	7.4
Q9UDY2	Q9UDY2	7	7	7	Tight junction protein ZO-2	TJP2	sp|Q9UDY2|ZO2_HUMAN Tight junction protein ZO-2 OS=Homo sapiens GN=TJP2 PE=1 SV=2	1	7	7	7	5	5	6	6	6	6	5	5	6	6	6	6	5	5	6	6	6	6	7.4	7.4	7.4	133.96	1190	1190	0	44.497	By MS/MS	By MS/MS	By MS/MS	By MS/MS	By MS/MS	By MS/MS	5.7	5.7	6.5	6.5	6.6	6.6
A0A087WV73;P46087;F5GYR3	A0A087WV73;P46087	6;6;2	6;6;2	6;6;2	Probable 28S rRNA (cytosine(4447)-C(5))-methyltransferase	NOP2	tr|A0A087WV73|A0A087WV73_HUMAN Probable 28S rRNA (cytosine(4447)-C(5))-methyltransferase OS=Homo sapiens GN=NOP2 PE=1 SV=1;sp|P46087|NOP2_HUMAN Probable 28S rRNA (cytosine(4447)-C(5))-methyltransferase OS=Homo sapiens GN=NOP2 PE=1 SV=2	3	6	6	6	2	2	4	5	6	4	2	2	4	5	6	4	2	2	4	5	6	4	8.7	8.7	8.7	94.095	855	855;812;275	0	38.504	By matching	By matching	By matching	By MS/MS	By MS/MS	By MS/MS	3	3	6.3	7.6	8.7	6.4
A0A0C4DG62;F8WCT1;Q66PJ3;F5GYV5;H7BZV4;F8WEP2;A0A0C4DH18;F5H7X4	A0A0C4DG62;F8WCT1;Q66PJ3;F5GYV5;H7BZV4;F8WEP2;A0A0C4DH18;F5H7X4	6;6;6;5;5;3;3;3	6;6;6;5;5;3;3;3	6;6;6;5;5;3;3;3	ADP-ribosylation factor-like protein 6-interacting protein 4	ARL6IP4	tr|A0A0C4DG62|A0A0C4DG62_HUMAN ADP-ribosylation factor-like protein 6-interacting protein 4 OS=Homo sapiens GN=ARL6IP4 PE=1 SV=1;tr|F8WCT1|F8WCT1_HUMAN ADP-ribosylation factor-like protein 6-interacting protein 4 OS=Homo sapiens GN=ARL6IP4 PE=1 SV=1;sp|Q66	8	6	6	6	6	6	6	6	6	6	6	6	6	6	6	6	6	6	6	6	6	6	24.8	24.8	24.8	24.591	218	218;229;421;211;216;170;181;307	0	49.556	By MS/MS	By MS/MS	By MS/MS	By MS/MS	By MS/MS	By MS/MS	24.8	24.8	24.8	24.8	24.8	24.8
A0A0D9SFB3;A0A0D9SG12;A0A0D9SF53;O00571;O15523;D6RCM4;Q9NQI0;A0A087WVZ1;A0A0J9YVQ7;C9J081;H0Y960	A0A0D9SFB3;A0A0D9SG12;A0A0D9SF53;O00571;O15523	7;7;7;7;6;2;2;1;1;1;1	6;6;6;6;5;2;2;1;1;1;1	6;6;6;6;5;2;2;1;1;1;1	ATP-dependent RNA helicase DDX3X;ATP-dependent RNA helicase DDX3Y	DDX3X;DDX3Y	tr|A0A0D9SFB3|A0A0D9SFB3_HUMAN ATP-dependent RNA helicase DDX3X OS=Homo sapiens GN=DDX3X PE=1 SV=1;tr|A0A0D9SG12|A0A0D9SG12_HUMAN ATP-dependent RNA helicase DDX3X OS=Homo sapiens GN=DDX3X PE=1 SV=1;tr|A0A0D9SF53|A0A0D9SF53_HUMAN ATP-dependent RNA helicase	11	7	6	6	7	3	7	6	7	6	6	3	6	5	6	5	6	3	6	5	6	5	13.3	11.6	11.6	70.839	640	640;647;733;662;660;518;724;138;164;250;305	0	38.817	By matching	By matching	By MS/MS	By MS/MS	By MS/MS	By MS/MS	13.3	5.9	13.3	11.4	13.3	11.4
A2A2D0;P16949	A2A2D0;P16949	8;8	8;8	6;6	Stathmin	STMN1	tr|A2A2D0|A2A2D0_HUMAN Stathmin (Fragment) OS=Homo sapiens GN=STMN1 PE=1 SV=7;sp|P16949|STMN1_HUMAN Stathmin OS=Homo sapiens GN=STMN1 PE=1 SV=3	2	8	8	6	6	5	5	6	7	6	6	5	5	6	7	6	4	4	4	5	5	5	58.1	58.1	46.5	9.8642	86	86;149	0	53.89	By MS/MS	By MS/MS	By MS/MS	By MS/MS	By MS/MS	By MS/MS	51.2	53.5	51.2	53.5	53.5	55.8
B2R4S9;U3KQK0;Q99880;Q99879;Q99877;Q93079;Q5QNW6;P62807;P58876;P57053;O60814;Q16778;P33778;P23527;P06899;Q8N257;Q96A08	B2R4S9;U3KQK0;Q99880;Q99879;Q99877;Q93079;Q5QNW6;P62807;P58876;P57053;O60814;Q16778;P33778;P23527;P06899;Q8N257;Q96A08	6;6;6;6;6;6;6;6;6;6;6;5;5;5;5;4;4	6;6;6;6;6;6;6;6;6;6;6;5;5;5;5;4;4	6;6;6;6;6;6;6;6;6;6;6;5;5;5;5;4;4	Histone H2B;Histone H2B type 1-L;Histone H2B type 1-M;Histone H2B type 1-N;Histone H2B type 1-H;Histone H2B type 2-F;Histone H2B type 1-C/E/F/G/I;Histone H2B type 1-D;Histone H2B type F-S;Histone H2B type 1-K;Histone H2B type 2-E;Histone H2B type 1-B;Histone H2B type 1-O;Histone H2B type 1-J;Histone H2B type 3-B;Histone H2B type 1-A	HIST1H2BI;HIST1H2BN;HIST1H2BL;HIST1H2BM;HIST1H2BH;HIST2H2BF;HIST1H2BC;HIST1H2BD;H2BFS;HIST1H2BK;HIST2H2BE;HIST1H2BB;HIST1H2BO;HIST1H2BJ;HIST3H2BB;HIST1H2BA	tr|B2R4S9|B2R4S9_HUMAN Histone H2B OS=Homo sapiens GN=HIST1H2BF PE=2 SV=1;tr|U3KQK0|U3KQK0_HUMAN Histone H2B OS=Homo sapiens GN=HIST1H2BN PE=1 SV=1;sp|Q99880|H2B1L_HUMAN Histone H2B type 1-L OS=Homo sapiens GN=HIST1H2BL PE=1 SV=3;sp|Q99879|H2B1M_HUMAN Hist	17	6	6	6	3	3	5	6	6	5	3	3	5	6	6	5	3	3	5	6	6	5	42.9	42.9	42.9	13.906	126	126;166;126;126;126;126;126;126;126;126;126;126;126;126;126;126;127	0	38.736	By MS/MS	By matching	By matching	By MS/MS	By MS/MS	By MS/MS	28.6	28.6	35.7	42.9	42.9	35.7
B5MDF5;P62826;J3KQE5;F5H018;B4DV51;H0YFC6;A0A087X0W0	B5MDF5;P62826;J3KQE5;F5H018;B4DV51	6;6;5;4;3;2;1	6;6;5;4;3;2;1	6;6;5;4;3;2;1	GTP-binding nuclear protein Ran	RAN	tr|B5MDF5|B5MDF5_HUMAN GTP-binding nuclear protein Ran OS=Homo sapiens GN=RAN PE=1 SV=1;sp|P62826|RAN_HUMAN GTP-binding nuclear protein Ran OS=Homo sapiens GN=RAN PE=1 SV=3;tr|J3KQE5|J3KQE5_HUMAN GTP-binding nuclear protein Ran (Fragment) OS=Homo sapiens G	7	6	6	6	3	3	3	6	6	6	3	3	3	6	6	6	3	3	3	6	6	6	31.8	31.8	31.8	26.224	233	233;216;234;199;128;103;53	0	49.661	By MS/MS	By MS/MS	By MS/MS	By MS/MS	By MS/MS	By MS/MS	17.6	15	15	31.8	31.8	31.8
E5RI99;P62888;A0A0B4J213;E5RJH3;A0A0C4DH44	E5RI99;P62888	6;6;2;2;2	6;6;2;2;2	6;6;2;2;2	60S ribosomal protein L30	RPL30	tr|E5RI99|E5RI99_HUMAN 60S ribosomal protein L30 (Fragment) OS=Homo sapiens GN=RPL30 PE=1 SV=1;sp|P62888|RL30_HUMAN 60S ribosomal protein L30 OS=Homo sapiens GN=RPL30 PE=1 SV=2	5	6	6	6	2	2	5	6	5	4	2	2	5	6	5	4	2	2	5	6	5	4	58.8	58.8	58.8	12.656	114	114;115;51;56;96	0	54.757	By matching	By MS/MS	By MS/MS	By MS/MS	By MS/MS	By MS/MS	25.4	24.6	51.8	58.8	51.8	42.1
G3V1Q4;E7ES33;E7EPK1;Q16181;Q5JXL7;A0A0U1RRM2;A0A0U1RRH9;A0A0U1RRE1;Q6ZU15	G3V1Q4;E7ES33;E7EPK1;Q16181	6;6;6;6;2;2;1;1;1	6;6;6;6;2;2;1;1;1	6;6;6;6;2;2;1;1;1	Septin-7	2020-09-07	tr|G3V1Q4|G3V1Q4_HUMAN Septin-7 OS=Homo sapiens GN=SEPT7 PE=1 SV=2;tr|E7ES33|E7ES33_HUMAN Septin-7 OS=Homo sapiens GN=SEPT7 PE=1 SV=3;tr|E7EPK1|E7EPK1_HUMAN Septin-7 OS=Homo sapiens GN=SEPT7 PE=1 SV=2;sp|Q16181|SEPT7_HUMAN Septin-7 OS=Homo sapiens GN=SEPT7	9	6	6	6	4	3	5	5	6	6	4	3	5	5	6	6	4	3	5	5	6	6	17	17	17	46.566	401	401;417;437;437;88;111;147;157;432	0	37.779	By matching	By matching	By matching	By MS/MS	By MS/MS	By MS/MS	10	7.7	14.7	15	17	17
F8VQE1;Q9UHB6;F8VS07;F8VRN8	F8VQE1;Q9UHB6;F8VS07;F8VRN8	6;6;5;3	6;6;5;3	6;6;5;3	LIM domain and actin-binding protein 1	LIMA1	tr|F8VQE1|F8VQE1_HUMAN LIM domain and actin-binding protein 1 OS=Homo sapiens GN=LIMA1 PE=1 SV=1;sp|Q9UHB6|LIMA1_HUMAN LIM domain and actin-binding protein 1 OS=Homo sapiens GN=LIMA1 PE=1 SV=1;tr|F8VS07|F8VS07_HUMAN LIM domain and actin-binding protein 1 O	4	6	6	6	1	2	2	6	5	5	1	2	2	6	5	5	1	2	2	6	5	5	14.5	14.5	14.5	66.99	598	598;759;456;388	0	42.36	By matching	By matching	By matching	By MS/MS	By MS/MS	By MS/MS	2	4.5	4.5	14.5	12.7	11.7
O00203;H0YBD0;Q13367	O00203	6;1;1	6;1;1	6;1;1	AP-3 complex subunit beta-1	AP3B1	sp|O00203|AP3B1_HUMAN AP-3 complex subunit beta-1 OS=Homo sapiens GN=AP3B1 PE=1 SV=3	3	6	6	6	4	4	5	6	5	5	4	4	5	6	5	5	4	4	5	6	5	5	6.5	6.5	6.5	121.32	1094	1094;154;1082	0	35.143	By MS/MS	By MS/MS	By MS/MS	By MS/MS	By MS/MS	By MS/MS	4.7	4.4	5.6	6.5	5.6	5.6
P00505	P00505	6	6	6	Aspartate aminotransferase, mitochondrial	GOT2	sp|P00505|AATM_HUMAN Aspartate aminotransferase, mitochondrial OS=Homo sapiens GN=GOT2 PE=1 SV=3	1	6	6	6	3	2	3	6	6	5	3	2	3	6	6	5	3	2	3	6	6	5	16.7	16.7	16.7	47.517	430	430	0	51.525	By matching	By matching	By MS/MS	By MS/MS	By MS/MS	By MS/MS	10.5	5.1	10.5	16.7	16.7	14.7
P07737;K7EJ44;CON__P02584;I3L3D5	P07737;K7EJ44;CON__P02584	6;5;3;2	6;5;3;2	6;5;3;2	Profilin-1	PFN1	sp|P07737|PROF1_HUMAN Profilin-1 OS=Homo sapiens GN=PFN1 PE=1 SV=2;tr|K7EJ44|K7EJ44_HUMAN Profilin OS=Homo sapiens GN=PFN1 PE=1 SV=1;	4	6	6	6	4	6	6	6	6	5	4	6	6	6	6	5	4	6	6	6	6	5	44.3	44.3	44.3	15.054	140	140;104;140;165	0	42.11	By MS/MS	By MS/MS	By MS/MS	By MS/MS	By MS/MS	By MS/MS	32.9	44.3	44.3	44.3	44.3	34.3
P23246;H0Y9K7	P23246	7;2	6;2	6;2	Splicing factor, proline- and glutamine-rich	SFPQ	sp|P23246|SFPQ_HUMAN Splicing factor, proline- and glutamine-rich OS=Homo sapiens GN=SFPQ PE=1 SV=2	2	7	6	6	3	7	6	7	7	7	2	6	6	6	6	6	2	6	6	6	6	6	10.3	9.2	9.2	76.149	707	707;223	0	39.3	By matching	By matching	By MS/MS	By MS/MS	By MS/MS	By MS/MS	4.8	10.3	9.2	10.3	10.3	10.3
P26639;D6RCA5;D6R9F8;D6RDJ6;D6RJ97;D6RHV7;D6RCS6	P26639	6;2;2;2;1;1;1	6;2;2;2;1;1;1	6;2;2;2;1;1;1	Threonine--tRNA ligase, cytoplasmic	TARS	sp|P26639|SYTC_HUMAN Threonine--tRNA ligase, cytoplasmic OS=Homo sapiens GN=TARS PE=1 SV=3	7	6	6	6	4	4	4	4	4	5	4	4	4	4	4	5	4	4	4	4	4	5	9.3	9.3	9.3	83.434	723	723;118;129;131;55;56;66	0	36.34	By MS/MS	By matching	By matching	By MS/MS	By MS/MS	By MS/MS	6.5	6.5	6.5	6.5	6.5	7.5
P34897;H0YIZ0;G3V2Y4;G3V5L0;G3V4W5	P34897;H0YIZ0;G3V2Y4	6;5;4;2;1	6;5;4;2;1	6;5;4;2;1	Serine hydroxymethyltransferase, mitochondrial;Serine hydroxymethyltransferase	SHMT2	sp|P34897|GLYM_HUMAN Serine hydroxymethyltransferase, mitochondrial OS=Homo sapiens GN=SHMT2 PE=1 SV=3;tr|H0YIZ0|H0YIZ0_HUMAN Serine hydroxymethyltransferase (Fragment) OS=Homo sapiens GN=SHMT2 PE=1 SV=1;tr|G3V2Y4|G3V2Y4_HUMAN Serine hydroxymethyltransfera	5	6	6	6	3	2	6	6	6	6	3	2	6	6	6	6	3	2	6	6	6	6	15.5	15.5	15.5	55.992	504	504;264;234;215;237	0	41.346	By matching	By matching	By MS/MS	By MS/MS	By MS/MS	By MS/MS	7.5	5.8	15.5	15.5	15.5	15.5
P35269;M0QXD6;M0R0Z3;M0R0R9	P35269;M0QXD6;M0R0Z3;M0R0R9	6;5;4;4	6;5;4;4	6;5;4;4	General transcription factor IIF subunit 1	GTF2F1	sp|P35269|T2FA_HUMAN General transcription factor IIF subunit 1 OS=Homo sapiens GN=GTF2F1 PE=1 SV=2;tr|M0QXD6|M0QXD6_HUMAN General transcription factor IIF subunit 1 (Fragment) OS=Homo sapiens GN=GTF2F1 PE=1 SV=1;tr|M0R0Z3|M0R0Z3_HUMAN General transcriptio	4	6	6	6	6	5	4	5	5	4	6	5	4	5	5	4	6	5	4	5	5	4	17.4	17.4	17.4	58.24	517	517;433;127;381	0	36.144	By MS/MS	By matching	By matching	By MS/MS	By MS/MS	By MS/MS	17.4	15.5	13.2	15.5	15.5	12
Q5T5C7;P49591	Q5T5C7;P49591	6;6	6;6	6;6	Serine--tRNA ligase, cytoplasmic	SARS	tr|Q5T5C7|Q5T5C7_HUMAN Serine--tRNA ligase, cytoplasmic OS=Homo sapiens GN=SARS PE=1 SV=1;sp|P49591|SYSC_HUMAN Serine--tRNA ligase, cytoplasmic OS=Homo sapiens GN=SARS PE=1 SV=3	2	6	6	6	4	5	5	5	5	4	4	5	5	5	5	4	4	5	5	5	5	4	12.5	12.5	12.5	61.312	536	536;514	0	37.347	By matching	By MS/MS	By MS/MS	By MS/MS	By MS/MS	By MS/MS	8	10.1	10.1	10.4	10.1	8
P51149;C9J4V0;C9J592;C9J8S3;C9J4S4;C9IZZ0;C9J7D1	P51149;C9J4V0;C9J592;C9J8S3;C9J4S4;C9IZZ0	6;4;4;4;3;3;2	6;4;4;4;3;3;2	6;4;4;4;3;3;2	Ras-related protein Rab-7a	RAB7A	sp|P51149|RAB7A_HUMAN Ras-related protein Rab-7a OS=Homo sapiens GN=RAB7A PE=1 SV=1;tr|C9J4V0|C9J4V0_HUMAN Ras-related protein Rab-7a OS=Homo sapiens GN=RAB7A PE=1 SV=1;tr|C9J592|C9J592_HUMAN Ras-related protein Rab-7a (Fragment) OS=Homo sapiens GN=RAB7A P	7	6	6	6	5	3	3	5	5	6	5	3	3	5	5	6	5	3	3	5	5	6	33.3	33.3	33.3	23.489	207	207;134;150;160;98;116;91	0	38.791	By MS/MS	By MS/MS	By MS/MS	By MS/MS	By MS/MS	By MS/MS	27.1	16.9	15.5	26.6	27.1	33.3
P54136;E5RH09;E5RJM9;E5RI24	P54136;E5RH09;E5RJM9	6;3;3;1	6;3;3;1	6;3;3;1	Arginine--tRNA ligase, cytoplasmic	RARS	sp|P54136|SYRC_HUMAN Arginine--tRNA ligase, cytoplasmic OS=Homo sapiens GN=RARS PE=1 SV=2;tr|E5RH09|E5RH09_HUMAN Arginine--tRNA ligase, cytoplasmic OS=Homo sapiens GN=RARS PE=1 SV=1;tr|E5RJM9|E5RJM9_HUMAN Arginine--tRNA ligase, cytoplasmic OS=Homo sapiens	4	6	6	6	3	3	3	5	4	3	3	3	3	5	4	3	3	3	3	5	4	3	10.6	10.6	10.6	75.378	660	660;113;129;58	0	37.582	By matching	By matching	By matching	By MS/MS	By MS/MS	By matching	5.5	5.3	5.9	9.1	7	4.7
P63261;P60709;I3L3I0;I3L1U9;G5E9R0;K7EM38;I3L3R2;E7EVS6;J3KT65;C9JUM1;C9JZR7;Q6S8J3;C9JTX5;I3L4N8;A5A3E0;P0CG38;Q9BYX7;Q562R1;P0CG39;F8WCH0	P63261;P60709;I3L3I0;I3L1U9	18;18;9;9;8;8;8;8;8;7;7;7;6;6;6;5;4;4;4;2	18;18;9;9;8;8;8;8;8;7;7;7;6;6;6;5;4;4;4;2	6;6;2;2;1;1;1;1;1;0;0;3;0;3;2;2;2;0;2;0	Actin, cytoplasmic 2;Actin, cytoplasmic 2, N-terminally processed;Actin, cytoplasmic 1;Actin, cytoplasmic 1, N-terminally processed	ACTG1;ACTB	sp|P63261|ACTG_HUMAN Actin, cytoplasmic 2 OS=Homo sapiens GN=ACTG1 PE=1 SV=1;sp|P60709|ACTB_HUMAN Actin, cytoplasmic 1 OS=Homo sapiens GN=ACTB PE=1 SV=1;tr|I3L3I0|I3L3I0_HUMAN Actin, cytoplasmic 2 (Fragment) OS=Homo sapiens GN=ACTG1 PE=1 SV=1;tr|I3L1U9|I3L	20	18	18	6	13	14	15	17	18	16	13	14	15	17	18	16	3	4	4	5	6	4	50.7	50.7	25.3	41.792	375	375;375;214;214;125;133;164;164;198;99;103;1075;80;242;1075;1075;375;376;1038;52	0	216.46	By MS/MS	By MS/MS	By MS/MS	By MS/MS	By MS/MS	By MS/MS	39.2	46.4	47.2	50.7	50.7	48
P62316;K7ERG4;K7EJB5	P62316;K7ERG4	6;4;1	6;4;1	6;4;1	Small nuclear ribonucleoprotein Sm D2	SNRPD2	sp|P62316|SMD2_HUMAN Small nuclear ribonucleoprotein Sm D2 OS=Homo sapiens GN=SNRPD2 PE=1 SV=1;tr|K7ERG4|K7ERG4_HUMAN Small nuclear ribonucleoprotein Sm D2 OS=Homo sapiens GN=SNRPD2 PE=1 SV=1	3	6	6	6	3	3	6	5	5	6	3	3	6	5	5	6	3	3	6	5	5	6	53.4	53.4	53.4	13.527	118	118;78;54	0	92.117	By MS/MS	By matching	By MS/MS	By MS/MS	By MS/MS	By MS/MS	22.9	32.2	53.4	38.1	47.5	53.4
P62829;C9JD32;B9ZVP7;J3KT29;J3KTJ3	P62829;C9JD32;B9ZVP7;J3KT29	6;4;4;4;2	6;4;4;4;2	6;4;4;4;2	60S ribosomal protein L23	RPL23	sp|P62829|RL23_HUMAN 60S ribosomal protein L23 OS=Homo sapiens GN=RPL23 PE=1 SV=1;tr|C9JD32|C9JD32_HUMAN 60S ribosomal protein L23 (Fragment) OS=Homo sapiens GN=RPL23 PE=1 SV=1;tr|B9ZVP7|B9ZVP7_HUMAN 60S ribosomal protein L23 OS=Homo sapiens GN=RPL23 PE=1	5	6	6	6	4	4	5	5	6	4	4	4	5	5	6	4	4	4	5	5	6	4	47.1	47.1	47.1	14.865	140	140;91;114;122;81	0	42.033	By matching	By matching	By MS/MS	By MS/MS	By MS/MS	By MS/MS	38.6	38.6	45.7	45.7	47.1	38.6
P62979;J3QS39;J3QTR3;F5H6Q2;F5GYU3;F5H2Z3;F5H265;B4DV12;F5H388;F5H747;F5GXK7;J3QKN0;Q5PY61;Q96C32;P62987;P0CG47;P0CG48;M0R1V7;M0R1M6;M0R2S1;J3QSA3;F5GZ39	P62979;J3QS39;J3QTR3;F5H6Q2;F5GYU3;F5H2Z3;F5H265;B4DV12;F5H388;F5H747;F5GXK7;J3QKN0;Q5PY61;Q96C32;P62987;P0CG47;P0CG48	6;3;3;3;3;3;3;3;3;3;3;3;3;3;3;3;3;2;2;2;1;1	6;3;3;3;3;3;3;3;3;3;3;3;3;3;3;3;3;2;2;2;1;1	6;3;3;3;3;3;3;3;3;3;3;3;3;3;3;3;3;2;2;2;1;1	Ubiquitin-40S ribosomal protein S27a;Ubiquitin;40S ribosomal protein S27a;Ubiquitin-60S ribosomal protein L40;Ubiquitin;60S ribosomal protein L40;Polyubiquitin-B;Ubiquitin;Polyubiquitin-C;Ubiquitin	RPS27A;UBB;UBC;UBA52	sp|P62979|RS27A_HUMAN Ubiquitin-40S ribosomal protein S27a OS=Homo sapiens GN=RPS27A PE=1 SV=2;tr|J3QS39|J3QS39_HUMAN Polyubiquitin-B (Fragment) OS=Homo sapiens GN=UBB PE=1 SV=1;tr|J3QTR3|J3QTR3_HUMAN Ubiquitin-40S ribosomal protein S27a (Fragment) OS=Homo	22	6	6	6	6	6	5	6	6	6	6	6	5	6	6	6	6	6	5	6	6	6	48.1	48.1	48.1	17.965	156	156;93;106;123;134;136;149;153;155;161;169;206;229;305;128;229;685;63;114;138;43;61	0	228.57	By MS/MS	By MS/MS	By MS/MS	By MS/MS	By MS/MS	By MS/MS	48.1	48.1	42.3	48.1	48.1	48.1
Q9BU76	Q9BU76	6	6	6	Multiple myeloma tumor-associated protein 2	MMTAG2	sp|Q9BU76|MMTA2_HUMAN Multiple myeloma tumor-associated protein 2 OS=Homo sapiens GN=MMTAG2 PE=1 SV=1	1	6	6	6	6	5	5	6	6	6	6	5	5	6	6	6	6	5	5	6	6	6	27.8	27.8	27.8	29.411	263	263	0	41.823	By MS/MS	By MS/MS	By MS/MS	By MS/MS	By MS/MS	By MS/MS	27.8	22.4	22.4	27.8	27.8	27.8
Q9P2N5;U3KPZ7	Q9P2N5;U3KPZ7	8;7	6;5	6;5	RNA-binding protein 27	RBM27	sp|Q9P2N5|RBM27_HUMAN RNA-binding protein 27 OS=Homo sapiens GN=RBM27 PE=1 SV=2;tr|U3KPZ7|U3KPZ7_HUMAN Uncharacterized protein OS=Homo sapiens PE=4 SV=1	2	8	6	6	5	5	7	4	5	4	4	4	6	3	3	3	4	4	6	3	3	3	8.3	7.1	7.1	118.72	1060	1060;1027	0	38.411	By MS/MS	By MS/MS	By MS/MS	By MS/MS	By MS/MS	By MS/MS	5.6	5.6	8.3	4.5	4.4	4.4
Q9UEU0;H0YJL5;H0YJJ5;J3KMW2;G3V5I2	Q9UEU0;H0YJL5	6;3;2;1;1	6;3;2;1;1	6;3;2;1;1	Vesicle transport through interaction with t-SNAREs homolog 1B	VTI1B	sp|Q9UEU0|VTI1B_HUMAN Vesicle transport through interaction with t-SNAREs homolog 1B OS=Homo sapiens GN=VTI1B PE=1 SV=3;tr|H0YJL5|H0YJL5_HUMAN Vesicle transport through interaction with t-SNAREs homolog 1B (Fragment) OS=Homo sapiens GN=VTI1B PE=1 SV=1	5	6	6	6	6	4	5	5	6	6	6	4	5	5	6	6	6	4	5	5	6	6	29.3	29.3	29.3	26.688	232	232;103;128;44;59	0	53.659	By MS/MS	By MS/MS	By MS/MS	By MS/MS	By MS/MS	By MS/MS	29.3	19.8	24.1	24.1	29.3	29.3
Q9UHD8;K7EJ51;K7ENL0;K7EK18;K7EL40;K7ERG1;K7ER34;K7EJV0;K7ER52;K7EPY1;K7EIE4;K7ER14;K7EQD7;K7EJL9	Q9UHD8;K7EJ51	6;3;2;2;2;1;1;1;1;1;1;1;1;1	6;3;2;2;2;1;1;1;1;1;1;1;1;1	6;3;2;2;2;1;1;1;1;1;1;1;1;1	Septin-9	2020-09-09	sp|Q9UHD8|SEPT9_HUMAN Septin-9 OS=Homo sapiens GN=SEPT9 PE=1 SV=2;tr|K7EJ51|K7EJ51_HUMAN Septin-9 (Fragment) OS=Homo sapiens GN=SEPT9 PE=1 SV=1	14	6	6	6	2	3	4	6	4	6	2	3	4	6	4	6	2	3	4	6	4	6	14.2	14.2	14.2	65.401	586	586;134;152;195;209;35;90;125;151;151;157;159;165;189	0	37.236	By MS/MS	By matching	By MS/MS	By MS/MS	By MS/MS	By MS/MS	4.6	8.4	10.1	14.2	9.2	14.2
Q9Y230;X6R2L4;M0R0Y3;M0R0Z0;M0QXZ7;M0QXI6	Q9Y230;X6R2L4;M0R0Y3	6;4;3;2;1;1	6;4;3;2;1;1	6;4;3;2;1;1	RuvB-like 2	RUVBL2	sp|Q9Y230|RUVB2_HUMAN RuvB-like 2 OS=Homo sapiens GN=RUVBL2 PE=1 SV=3;tr|X6R2L4|X6R2L4_HUMAN RuvB-like helicase OS=Homo sapiens GN=RUVBL2 PE=1 SV=1;tr|M0R0Y3|M0R0Y3_HUMAN RuvB-like helicase OS=Homo sapiens GN=RUVBL2 PE=1 SV=1	6	6	6	6	5	4	5	6	5	4	5	4	5	6	5	4	5	4	5	6	5	4	15.6	15.6	15.6	51.156	463	463;259;354;50;39;109	0	40.892	By MS/MS	By matching	By MS/MS	By MS/MS	By MS/MS	By MS/MS	12.7	10.2	12.7	15.6	12.7	10.2
Q9Y490;H0YMT1;Q9Y4G6	Q9Y490	6;2;2	6;2;2	6;2;2	Talin-1	TLN1	sp|Q9Y490|TLN1_HUMAN Talin-1 OS=Homo sapiens GN=TLN1 PE=1 SV=3	3	6	6	6	1	0	2	6	6	5	1	0	2	6	6	5	1	0	2	6	6	5	3.9	3.9	3.9	269.76	2541	2541;1471;2542	0	36.03	By matching		By matching	By MS/MS	By MS/MS	By MS/MS	0.8	0	1.3	3.9	3.9	3.4
A0A087WUT6;O60841	A0A087WUT6;O60841	5;5	5;5	5;5	Eukaryotic translation initiation factor 5B	EIF5B	tr|A0A087WUT6|A0A087WUT6_HUMAN Eukaryotic translation initiation factor 5B OS=Homo sapiens GN=EIF5B PE=1 SV=1;sp|O60841|IF2P_HUMAN Eukaryotic translation initiation factor 5B OS=Homo sapiens GN=EIF5B PE=1 SV=4	2	5	5	5	5	3	4	5	5	5	5	3	4	5	5	5	5	3	4	5	5	5	3.3	3.3	3.3	138.68	1220	1220;1220	0	37.675	By MS/MS	By MS/MS	By MS/MS	By MS/MS	By MS/MS	By MS/MS	3.3	2.7	3.3	3.3	3.3	3.3
A0A087WUZ3;Q01082	A0A087WUZ3;Q01082	5;5	5;5	5;5	Spectrin beta chain, non-erythrocytic 1	SPTBN1	tr|A0A087WUZ3|A0A087WUZ3_HUMAN Spectrin beta chain, non-erythrocytic 1 OS=Homo sapiens GN=SPTBN1 PE=1 SV=1;sp|Q01082|SPTB2_HUMAN Spectrin beta chain, non-erythrocytic 1 OS=Homo sapiens GN=SPTBN1 PE=1 SV=2	2	5	5	5	2	2	4	4	4	3	2	2	4	4	4	3	2	2	4	4	4	3	2.9	2.9	2.9	274.83	2366	2366;2364	0	29.49	By matching	By matching	By matching	By MS/MS	By MS/MS	By MS/MS	1.3	1	2.1	2.1	2.5	1.4
F8W7S5;A0A087WVV2;A0A0A0MRV0;Q9P2E9;H0YDJ4;H9KV85;E9PN67;C9J066;Q8N4C6	F8W7S5;A0A087WVV2;A0A0A0MRV0;Q9P2E9	5;5;5;5;1;1;1;1;1	5;5;5;5;1;1;1;1;1	5;5;5;5;1;1;1;1;1	Ribosome-binding protein 1	RRBP1	tr|F8W7S5|F8W7S5_HUMAN Ribosome-binding protein 1 OS=Homo sapiens GN=RRBP1 PE=1 SV=1;tr|A0A087WVV2|A0A087WVV2_HUMAN Ribosome-binding protein 1 OS=Homo sapiens GN=RRBP1 PE=1 SV=1;tr|A0A0A0MRV0|A0A0A0MRV0_HUMAN Ribosome-binding protein 1 OS=Homo sapiens GN=R	9	5	5	5	3	2	3	4	5	3	3	2	3	4	5	3	3	2	3	4	5	3	8.1	8.1	8.1	84.325	751	751;934;1410;1410;1537;1581;1989;2046;2090	0	32.851	By matching	By matching	By matching	By MS/MS	By MS/MS	By MS/MS	4.7	3.5	4.7	6.4	8.1	4.8
A0A087WYT3;Q15185;B4DDC6	A0A087WYT3;Q15185;B4DDC6	5;5;3	5;5;3	5;5;3	Prostaglandin E synthase 3	PTGES3	tr|A0A087WYT3|A0A087WYT3_HUMAN Prostaglandin E synthase 3 OS=Homo sapiens GN=PTGES3 PE=1 SV=1;sp|Q15185|TEBP_HUMAN Prostaglandin E synthase 3 OS=Homo sapiens GN=PTGES3 PE=1 SV=1;tr|B4DDC6|B4DDC6_HUMAN Prostaglandin E synthase 3 OS=Homo sapiens GN=PTGES3 PE	3	5	5	5	4	3	3	4	3	3	4	3	3	4	3	3	4	3	3	4	3	3	25.6	25.6	25.6	19.155	164	164;160;124	0	31.528	By MS/MS	By MS/MS	By matching	By MS/MS	By MS/MS	By MS/MS	25	10.4	10.4	20.7	20.1	16.5
A0A087WZH7;P29966	A0A087WZH7;P29966	5;5	5;5	5;5	Myristoylated alanine-rich C-kinase substrate	MARCKS	tr|A0A087WZH7|A0A087WZH7_HUMAN Myristoylated alanine-rich C-kinase substrate OS=Homo sapiens GN=MARCKS PE=1 SV=1;sp|P29966|MARCS_HUMAN Myristoylated alanine-rich C-kinase substrate OS=Homo sapiens GN=MARCKS PE=1 SV=4	2	5	5	5	4	4	5	5	5	4	4	4	5	5	5	4	4	4	5	5	5	4	28.2	28.2	28.2	31.595	330	330;332	0	35.671	By matching	By matching	By MS/MS	By MS/MS	By MS/MS	By MS/MS	18.5	25.2	28.2	28.2	28.2	23.9
E5RJN7;E7EVI1;A0A0A0MTC4;A0A0A0MTD1;F8VPI7;E7EPX0;A0A0A0MTC6;E7EVJ4;E9PH62;A0A0A0MTC5;Q9NUL3;G5EA18;E5RJ67;E5RFK1	E5RJN7;E7EVI1;A0A0A0MTC4;A0A0A0MTD1;F8VPI7;E7EPX0;A0A0A0MTC6;E7EVJ4;E9PH62;A0A0A0MTC5;Q9NUL3;G5EA18	7;7;7;7;7;7;7;7;7;7;7;6;2;1	7;7;7;7;7;7;7;7;7;7;7;6;2;1	5;5;5;5;5;5;5;5;5;5;5;4;2;1	Double-stranded RNA-binding protein Staufen homolog 2	STAU2	tr|E5RJN7|E5RJN7_HUMAN Double-stranded RNA-binding protein Staufen homolog 2 (Fragment) OS=Homo sapiens GN=STAU2 PE=1 SV=1;tr|E7EVI1|E7EVI1_HUMAN Double-stranded RNA-binding protein Staufen homolog 2 OS=Homo sapiens GN=STAU2 PE=1 SV=1;tr|A0A0A0MTC4|A0A0A0M	14	7	7	5	5	5	5	7	5	4	5	5	5	7	5	4	4	4	4	5	4	3	25.3	25.3	20.6	34.861	320	320;390;398;473;479;491;504;511;538;570;570;291;135;204	0	45.707	By MS/MS	By MS/MS	By MS/MS	By MS/MS	By MS/MS	By MS/MS	19.7	19.1	19.1	25.3	19.7	15.6
H7C2W9;C9JU56;B7Z4E3;B7Z4C8;P62899;B8ZZK4	H7C2W9;C9JU56;B7Z4E3;B7Z4C8;P62899;B8ZZK4	5;5;5;5;5;3	5;5;5;5;5;3	5;5;5;5;5;3	60S ribosomal protein L31	RPL31	tr|H7C2W9|H7C2W9_HUMAN 60S ribosomal protein L31 (Fragment) OS=Homo sapiens GN=RPL31 PE=1 SV=1;tr|C9JU56|C9JU56_HUMAN 60S ribosomal protein L31 (Fragment) OS=Homo sapiens GN=RPL31 PE=1 SV=1;tr|B7Z4E3|B7Z4E3_HUMAN 60S ribosomal protein L31 OS=Homo sapiens G	6	5	5	5	4	4	5	4	5	5	4	4	5	4	5	5	4	4	5	4	5	5	45.4	45.4	45.4	12.701	108	108;115;120;130;125;79	0	34.688	By MS/MS	By MS/MS	By MS/MS	By MS/MS	By MS/MS	By MS/MS	37	37	45.4	37	45.4	45.4
C9JRH2;C9JMJ4;C9J3R0;C9JQZ4;C9JW69;P18754	C9JRH2;C9JMJ4;C9J3R0;C9JQZ4;C9JW69;P18754	5;5;5;5;5;5	5;5;5;5;5;5	5;5;5;5;5;5	Regulator of chromosome condensation	RCC1	tr|C9JRH2|C9JRH2_HUMAN Regulator of chromosome condensation (Fragment) OS=Homo sapiens GN=RCC1 PE=1 SV=1;tr|C9JMJ4|C9JMJ4_HUMAN Regulator of chromosome condensation (Fragment) OS=Homo sapiens GN=RCC1 PE=1 SV=1;tr|C9J3R0|C9J3R0_HUMAN Regulator of chromosome	6	5	5	5	0	0	2	4	4	3	0	0	2	4	4	3	0	0	2	4	4	3	33.9	33.9	33.9	24.465	230	230;272;273;283;372;421	0	45.809			By MS/MS	By MS/MS	By MS/MS	By MS/MS	0	0	14.8	28.3	28.3	18.3
F8WCJ1;C9J7B5;C9J4W5;I3L397;I3L504;Q9GZV4;P63241;Q6IS14	F8WCJ1;C9J7B5;C9J4W5;I3L397;I3L504;Q9GZV4;P63241;Q6IS14	5;5;5;5;5;5;5;3	5;5;5;5;5;5;5;3	5;5;5;5;5;5;5;3	Eukaryotic translation initiation factor 5A;Eukaryotic translation initiation factor 5A-2;Eukaryotic translation initiation factor 5A-1;Eukaryotic translation initiation factor 5A-1-like	EIF5A2;EIF5A;EIF5AL1	tr|F8WCJ1|F8WCJ1_HUMAN Eukaryotic translation initiation factor 5A OS=Homo sapiens GN=EIF5A2 PE=1 SV=1;tr|C9J7B5|C9J7B5_HUMAN Eukaryotic translation initiation factor 5A OS=Homo sapiens GN=EIF5A2 PE=1 SV=1;tr|C9J4W5|C9J4W5_HUMAN Eukaryotic translation init	8	5	5	5	5	5	5	4	5	5	5	5	5	4	5	5	5	5	5	4	5	5	37.1	37.1	37.1	11.687	105	105;109;115;147;186;153;154;154	0	36.525	By MS/MS	By MS/MS	By MS/MS	By MS/MS	By MS/MS	By MS/MS	37.1	37.1	37.1	25.7	37.1	37.1
C9JFR7;P99999	C9JFR7;P99999	5;5	5;5	5;5	Cytochrome c	CYCS	tr|C9JFR7|C9JFR7_HUMAN Cytochrome c (Fragment) OS=Homo sapiens GN=CYCS PE=1 SV=1;sp|P99999|CYC_HUMAN Cytochrome c OS=Homo sapiens GN=CYCS PE=1 SV=2	2	5	5	5	5	4	5	5	5	5	5	4	5	5	5	5	5	4	5	5	5	5	25.7	25.7	25.7	11.333	101	101;105	0	31.387	By matching	By matching	By MS/MS	By MS/MS	By MS/MS	By MS/MS	25.7	24.8	25.7	25.7	25.7	25.7
C9JW96;P35232;C9JZ20;E7ESE2;E9PCW0;D6RBK0	C9JW96;P35232;C9JZ20;E7ESE2;E9PCW0	5;5;4;4;4;2	5;5;4;4;4;2	5;5;4;4;4;2	Prohibitin	PHB	tr|C9JW96|C9JW96_HUMAN Prohibitin (Fragment) OS=Homo sapiens GN=PHB PE=1 SV=2;sp|P35232|PHB_HUMAN Prohibitin OS=Homo sapiens GN=PHB PE=1 SV=1;tr|C9JZ20|C9JZ20_HUMAN Prohibitin (Fragment) OS=Homo sapiens GN=PHB PE=1 SV=1;tr|E7ESE2|E7ESE2_HUMAN Prohibitin (F	6	5	5	5	1	0	4	5	5	5	1	0	4	5	5	5	1	0	4	5	5	5	22	22	22	26.891	246	246;272;201;202;216;124	0	34.241	By matching		By MS/MS	By MS/MS	By MS/MS	By MS/MS	4.1	0	17.5	22	22	22
C9JXG8;F6WQW2;P43487;C9JGV6;C9JJ34;C9JIC6;Q5T0Z6;C9JDM3;Q9C010	C9JXG8;F6WQW2;P43487;C9JGV6;C9JJ34	5;5;5;4;3;1;1;1;1	5;5;5;4;3;1;1;1;1	5;5;5;4;3;1;1;1;1	Ran-specific GTPase-activating protein	RANBP1	tr|C9JXG8|C9JXG8_HUMAN Ran-specific GTPase-activating protein (Fragment) OS=Homo sapiens GN=RANBP1 PE=1 SV=2;tr|F6WQW2|F6WQW2_HUMAN Ran-specific GTPase-activating protein OS=Homo sapiens GN=RANBP1 PE=1 SV=1;sp|P43487|RANG_HUMAN Ran-specific GTPase-activati	9	5	5	5	4	5	4	5	5	4	4	5	4	5	5	4	4	5	4	5	5	4	49	49	49	16.9	145	145;278;201;205;163;53;87;166;78	0	38.251	By MS/MS	By MS/MS	By MS/MS	By MS/MS	By MS/MS	By MS/MS	33.1	49	42.8	49	49	33.1
CON__P05787;P05787;F8VUG2;F8VP67;F8W1U3;CON__H-INV:HIT000292931;CON__H-INV:HIT000016045;F8W0C6	CON__P05787;P05787;F8VUG2;F8VP67;F8W1U3;CON__H-INV:HIT000292931	6;6;5;3;3;3;2;1	5;5;4;2;2;3;1;0	5;5;4;2;2;3;1;0	Keratin, type II cytoskeletal 8	KRT8	;sp|P05787|K2C8_HUMAN Keratin, type II cytoskeletal 8 OS=Homo sapiens GN=KRT8 PE=1 SV=7;tr|F8VUG2|F8VUG2_HUMAN Keratin, type II cytoskeletal 8 (Fragment) OS=Homo sapiens GN=KRT8 PE=1 SV=1;tr|F8VP67|F8VP67_HUMAN Keratin, type II cytoskeletal 8 (Fragment) OS	8	6	5	5	6	6	4	1	2	1	5	5	3	0	1	0	5	5	3	0	1	0	15.1	13	13	53.704	483	483;483;273;113;289;443;99;179	0	35.332	By MS/MS	By MS/MS	By MS/MS	By matching	By matching	By matching	15.1	15.1	10.8	2.1	4.6	2.1
CON__P12763	CON__P12763	5	5	5				1	5	5	5	5	2	5	5	5	5	5	2	5	5	5	5	5	2	5	5	5	5	21.7	21.7	21.7	38.418	359	359	0	33.638	By MS/MS	By matching	By MS/MS	By MS/MS	By MS/MS	By MS/MS	21.7	9.7	21.7	21.7	21.7	21.7
CON__P35908;P35908	CON__P35908;P35908	9;9	7;7	5;5	Keratin, type II cytoskeletal 2 epidermal	KRT2	;sp|P35908|K22E_HUMAN Keratin, type II cytoskeletal 2 epidermal OS=Homo sapiens GN=KRT2 PE=1 SV=2	2	9	7	5	2	3	6	7	9	7	1	2	5	6	7	5	1	2	4	5	5	5	18.8	15.7	12.1	65.865	645	645;639	0	55.076	By matching	By matching	By matching	By MS/MS	By MS/MS	By MS/MS	3.3	8.2	14.3	16.1	18.8	15.2
CON__Q04695;Q04695;F5GWP8;K7EPJ9;CON__Q9QWL7;K7ELP7;K7ESE1	CON__Q04695;Q04695;F5GWP8;K7EPJ9;CON__Q9QWL7	6;6;5;4;4;1;1	5;5;4;3;3;1;1	5;5;4;3;3;1;1	Keratin, type I cytoskeletal 17	KRT17	;sp|Q04695|K1C17_HUMAN Keratin, type I cytoskeletal 17 OS=Homo sapiens GN=KRT17 PE=1 SV=2;tr|F5GWP8|F5GWP8_HUMAN Keratin, type I cytoskeletal 17 OS=Homo sapiens GN=KRT17 PE=1 SV=2;tr|K7EPJ9|K7EPJ9_HUMAN Keratin, type I cytoskeletal 17 (Fragment) OS=Homo sa	7	6	5	5	6	5	5	3	4	4	5	4	4	2	3	3	5	4	4	2	3	3	20.4	18.8	18.8	48.105	432	432;432;349;231;433;49;95	0	55.018	By MS/MS	By MS/MS	By MS/MS	By matching	By matching	By matching	20.4	17.4	17.4	9.7	12.5	12.5
E7EQR4;P15311	E7EQR4;P15311	9;9	9;9	5;5	Ezrin	EZR	tr|E7EQR4|E7EQR4_HUMAN Ezrin OS=Homo sapiens GN=EZR PE=1 SV=3;sp|P15311|EZRI_HUMAN Ezrin OS=Homo sapiens GN=EZR PE=1 SV=4	2	9	9	5	9	7	8	9	8	8	9	7	8	9	8	8	5	4	4	5	4	5	15	15	9.6	69.371	586	586;586	0	61.683	By MS/MS	By MS/MS	By MS/MS	By MS/MS	By MS/MS	By MS/MS	15	12.8	12.8	15	13.7	15
E9PES6;E7ES08;E7EQU1;O15347	E9PES6;E7ES08;E7EQU1;O15347	5;5;5;5	5;5;5;5	5;5;5;5	High mobility group protein B3	HMGB3	tr|E9PES6|E9PES6_HUMAN High mobility group protein B3 (Fragment) OS=Homo sapiens GN=HMGB3 PE=1 SV=1;tr|E7ES08|E7ES08_HUMAN High mobility group protein B3 (Fragment) OS=Homo sapiens GN=HMGB3 PE=1 SV=1;tr|E7EQU1|E7EQU1_HUMAN High mobility group protein B3 (F	4	5	5	5	3	2	5	5	5	5	3	2	5	5	5	5	3	2	5	5	5	5	26.8	26.8	26.8	17.522	153	153;188;193;200	0	35.13	By matching	By matching	By MS/MS	By MS/MS	By MS/MS	By MS/MS	24.8	16.3	26.8	26.8	26.8	26.8
E7EX73;E9PGM1;E7EUU4;Q04637;A0A0A0MR52;H7C044;C9J6B6;C9J2Z7;C9K073;C9JF13;A0A0A0MSA7;A0A0U1RQK7;O43432	E7EX73;E9PGM1;E7EUU4;Q04637;A0A0A0MR52;H7C044	5;5;5;5;4;3;1;1;1;1;1;1;1	5;5;5;5;4;3;1;1;1;1;1;1;1	5;5;5;5;4;3;1;1;1;1;1;1;1	Eukaryotic translation initiation factor 4 gamma 1	EIF4G1	tr|E7EX73|E7EX73_HUMAN Eukaryotic translation initiation factor 4 gamma 1 OS=Homo sapiens GN=EIF4G1 PE=1 SV=1;tr|E9PGM1|E9PGM1_HUMAN Eukaryotic translation initiation factor 4 gamma 1 OS=Homo sapiens GN=EIF4G1 PE=1 SV=1;tr|E7EUU4|E7EUU4_HUMAN Eukaryotic tr	13	5	5	5	3	3	4	5	5	3	3	3	4	5	5	3	3	3	4	5	5	3	5.2	5.2	5.2	158.64	1436	1436;1513;1560;1599;1395;226;757;834;869;903;1621;1774;1585	0	36.452	By matching	By matching	By matching	By MS/MS	By MS/MS	By MS/MS	3.3	3.3	4	5.2	5.2	3.3
E7EX29;P63104;E5RIR4;E9PD24;E7EVZ2;E7ESK7;E5RGE1;B7Z2E6;H0YB80;B0AZS6	E7EX29;P63104;E5RIR4;E9PD24;E7EVZ2;E7ESK7;E5RGE1	8;8;6;6;6;6;5;2;2;2	8;8;6;6;6;6;5;2;2;2	5;5;3;3;3;3;3;2;2;2	14-3-3 protein zeta/delta	YWHAZ	tr|E7EX29|E7EX29_HUMAN 14-3-3 protein zeta/delta (Fragment) OS=Homo sapiens GN=YWHAZ PE=1 SV=1;sp|P63104|1433Z_HUMAN 14-3-3 protein zeta/delta OS=Homo sapiens GN=YWHAZ PE=1 SV=1;tr|E5RIR4|E5RIR4_HUMAN 14-3-3 protein zeta/delta (Fragment) OS=Homo sapiens GN	10	8	8	5	7	5	8	8	7	8	7	5	8	8	7	8	4	3	5	5	5	5	26.4	26.4	17.9	28.036	246	246;245;75;92;98;137;52;125;130;168	0	126.85	By MS/MS	By MS/MS	By MS/MS	By MS/MS	By MS/MS	By MS/MS	22.8	19.9	26.4	26.4	23.6	26.4
E9PK01;P29692;E9PMW7;E9PPR1;E9PL12;E9PQ49;E9PI39;A0A087X1X7;E9PRY8;E9PN91;E9PIZ1;E9PL71;H0YCK7;E9PQZ1;E9PKK3;E9PK72;E9PK06;E9PNW6;E9PQC9;E9PJD0;H0YE58;H0YE72	E9PK01;P29692;E9PMW7;E9PPR1;E9PL12;E9PQ49;E9PI39;A0A087X1X7;E9PRY8;E9PN91;E9PIZ1;E9PL71;H0YCK7;E9PQZ1	5;5;4;4;4;4;4;4;4;3;3;3;3;3;2;2;2;1;1;1;1;1	5;5;4;4;4;4;4;4;4;3;3;3;3;3;2;2;2;1;1;1;1;1	5;5;4;4;4;4;4;4;4;3;3;3;3;3;2;2;2;1;1;1;1;1	Elongation factor 1-delta	EEF1D	tr|E9PK01|E9PK01_HUMAN Elongation factor 1-delta (Fragment) OS=Homo sapiens GN=EEF1D PE=1 SV=1;sp|P29692|EF1D_HUMAN Elongation factor 1-delta OS=Homo sapiens GN=EEF1D PE=1 SV=5;tr|E9PMW7|E9PMW7_HUMAN Elongation factor 1-delta OS=Homo sapiens GN=EEF1D PE=1	22	5	5	5	5	4	4	5	5	4	5	4	4	5	5	4	5	4	4	5	5	4	27.6	27.6	27.6	28.821	261	261;281;130;166;168;199;204;631;697;106;137;187;210;238;39;63;140;35;36;99;119;156	0	49.766	By MS/MS	By MS/MS	By MS/MS	By MS/MS	By MS/MS	By MS/MS	27.6	24.1	24.1	27.6	27.6	23
F5GZ78;P49023;F5H836;H0YIE4	F5GZ78;P49023	5;5;2;1	5;5;2;1	5;5;2;1	Paxillin	PXN	tr|F5GZ78|F5GZ78_HUMAN Paxillin OS=Homo sapiens GN=PXN PE=1 SV=1;sp|P49023|PAXI_HUMAN Paxillin OS=Homo sapiens GN=PXN PE=1 SV=3	4	5	5	5	5	4	4	4	4	2	5	4	4	4	4	2	5	4	4	4	4	2	11.7	11.7	11.7	64.232	589	589;591;177;171	0	29.742	By MS/MS	By matching	By MS/MS	By MS/MS	By MS/MS	By matching	11.7	8.7	8.7	10.2	10.2	5.3
F5H0C8;P09104;F5H1C3	F5H0C8;P09104;F5H1C3	6;6;4	5;5;3	5;5;3	Enolase;Gamma-enolase	ENO2	tr|F5H0C8|F5H0C8_HUMAN Gamma-enolase OS=Homo sapiens GN=ENO2 PE=1 SV=1;sp|P09104|ENOG_HUMAN Gamma-enolase OS=Homo sapiens GN=ENO2 PE=1 SV=3;tr|F5H1C3|F5H1C3_HUMAN Gamma-enolase (Fragment) OS=Homo sapiens GN=ENO2 PE=1 SV=1	3	6	5	5	3	3	2	2	2	5	2	2	1	1	1	4	2	2	1	1	1	4	22.5	16.8	16.8	34.762	315	315;434;103	0	31.751	By matching	By MS/MS	By matching	By matching	By matching	By MS/MS	13.7	13.7	9.5	9.5	9.5	22.5
H3BRU6;F8VZX2;Q15366;F8W0G4;F8VXH9;F8W1G6;H3BND9;H3BSS4;F8VRH0;J3QT27;E9PFP8;P57721;F8VTZ0	H3BRU6;F8VZX2;Q15366;F8W0G4;F8VXH9;F8W1G6	7;7;7;4;4;4;2;2;2;2;2;2;1	5;5;5;2;2;2;1;2;2;1;1;1;0	5;5;5;2;2;2;1;2;2;1;1;1;0	Poly(rC)-binding protein 2	PCBP2	tr|H3BRU6|H3BRU6_HUMAN Poly(rC)-binding protein 2 (Fragment) OS=Homo sapiens GN=PCBP2 PE=1 SV=1;tr|F8VZX2|F8VZX2_HUMAN Poly(rC)-binding protein 2 OS=Homo sapiens GN=PCBP2 PE=1 SV=1;sp|Q15366|PCBP2_HUMAN Poly(rC)-binding protein 2 OS=Homo sapiens GN=PCBP2 P	13	7	5	5	3	3	4	6	6	5	3	3	3	4	5	4	3	3	3	4	5	4	36.2	29.9	29.9	31.6	301	301;321;365;158;160;202;112;184;310;322;361;371;64	0	33.627	By MS/MS	By MS/MS	By MS/MS	By MS/MS	By MS/MS	By MS/MS	15.3	15.3	18.9	29.2	33.6	23.3
H0YA96;H0Y8G5;Q14103;D6RF44;D6RAF8;D6RBQ9;D6RD83	H0YA96;H0Y8G5;Q14103;D6RF44;D6RAF8;D6RBQ9;D6RD83	6;6;6;5;5;4;3	6;6;6;5;5;4;3	5;5;5;4;4;3;3	Heterogeneous nuclear ribonucleoprotein D0	HNRNPD	tr|H0YA96|H0YA96_HUMAN Heterogeneous nuclear ribonucleoprotein D0 (Fragment) OS=Homo sapiens GN=HNRNPD PE=1 SV=1;tr|H0Y8G5|H0Y8G5_HUMAN Heterogeneous nuclear ribonucleoprotein D0 (Fragment) OS=Homo sapiens GN=HNRNPD PE=1 SV=7;sp|Q14103|HNRPD_HUMAN Heteroge	7	6	6	5	4	3	5	6	6	4	4	3	5	6	6	4	4	3	4	5	5	4	26.2	26.2	21.4	23.811	210	210;261;355;112;221;155;92	0	52.017	By MS/MS	By MS/MS	By MS/MS	By MS/MS	By MS/MS	By MS/MS	21	15.2	25.7	26.2	26.2	17.6
H0Y9V9;P32969;D6RAN4;H0Y9R4;E7ESE0	H0Y9V9;P32969;D6RAN4;H0Y9R4;E7ESE0	5;5;4;3;3	5;5;4;3;3	5;5;4;3;3	60S ribosomal protein L9	RPL9	tr|H0Y9V9|H0Y9V9_HUMAN 60S ribosomal protein L9 (Fragment) OS=Homo sapiens GN=RPL9 PE=1 SV=1;sp|P32969|RL9_HUMAN 60S ribosomal protein L9 OS=Homo sapiens GN=RPL9 PE=1 SV=1;tr|D6RAN4|D6RAN4_HUMAN 60S ribosomal protein L9 (Fragment) OS=Homo sapiens GN=RPL9 P	5	5	5	5	4	1	3	4	4	4	4	1	3	4	4	4	4	1	3	4	4	4	30.7	30.7	30.7	21.459	189	189;192;182;91;166	0	41.919	By MS/MS	By matching	By MS/MS	By MS/MS	By MS/MS	By MS/MS	24.9	7.4	24.3	19	19	19
H0YH81;P06576;F8W079;F8W0P7	H0YH81;P06576	5;5;2;1	5;5;2;1	5;5;2;1	ATP synthase subunit beta;ATP synthase subunit beta, mitochondrial	ATP5B	tr|H0YH81|H0YH81_HUMAN ATP synthase subunit beta (Fragment) OS=Homo sapiens GN=ATP5B PE=1 SV=1;sp|P06576|ATPB_HUMAN ATP synthase subunit beta, mitochondrial OS=Homo sapiens GN=ATP5B PE=1 SV=3	4	5	5	5	2	3	5	5	5	3	2	3	5	5	5	3	2	3	5	5	5	3	20.4	20.4	20.4	38.138	362	362;529;284;270	0	33.234	By matching	By matching	By MS/MS	By MS/MS	By MS/MS	By MS/MS	9.4	11.9	20.4	20.4	20.4	12.7
J3KTA4;P17844;J3QRQ7;X6RLV5;J3QR02;J3KRX8	J3KTA4;P17844	8;8;2;1;1;1	5;5;1;1;1;1	5;5;1;1;1;1	Probable ATP-dependent RNA helicase DDX5	DDX5	tr|J3KTA4|J3KTA4_HUMAN Probable ATP-dependent RNA helicase DDX5 OS=Homo sapiens GN=DDX5 PE=1 SV=1;sp|P17844|DDX5_HUMAN Probable ATP-dependent RNA helicase DDX5 OS=Homo sapiens GN=DDX5 PE=1 SV=1	6	8	5	5	5	3	6	8	8	5	3	2	4	5	5	2	3	2	4	5	5	2	14.2	8.3	8.3	69.086	614	614;614;212;96;99;120	0	32.209	By matching	By matching	By matching	By MS/MS	By MS/MS	By matching	9	4.6	10.3	14.2	14.2	8.8
M0R181;P46778;G3V1B3	M0R181;P46778;G3V1B3	5;5;3	5;5;3	5;5;3	60S ribosomal protein L21	RPL21	tr|M0R181|M0R181_HUMAN 60S ribosomal protein L21 (Fragment) OS=Homo sapiens GN=RPL21 PE=1 SV=1;sp|P46778|RL21_HUMAN 60S ribosomal protein L21 OS=Homo sapiens GN=RPL21 PE=1 SV=2;tr|G3V1B3|G3V1B3_HUMAN 60S ribosomal protein L21 OS=Homo sapiens GN=RPL21 PE=1	3	5	5	5	5	5	5	5	5	4	5	5	5	5	5	4	5	5	5	5	5	4	35.2	35.2	35.2	14.149	122	122;160;87	0	57.717	By MS/MS	By MS/MS	By MS/MS	By MS/MS	By MS/MS	By MS/MS	35.2	35.2	35.2	35.2	35.2	32.8
O60749;D6RC15	O60749	5;1	5;1	5;1	Sorting nexin-2	SNX2	sp|O60749|SNX2_HUMAN Sorting nexin-2 OS=Homo sapiens GN=SNX2 PE=1 SV=2	2	5	5	5	3	2	3	3	5	1	3	2	3	3	5	1	3	2	3	3	5	1	11.8	11.8	11.8	58.47	519	519;266	0	31.426	By matching	By matching	By matching	By MS/MS	By MS/MS	By matching	6.9	4.6	6.9	6.4	11.8	2.3
Q5JRI1;O75494;Q6IQ42;R4GMP8	Q5JRI1;O75494	8;8;2;1	8;8;2;1	5;5;2;1	Serine/arginine-rich splicing factor 10	SRSF10	tr|Q5JRI1|Q5JRI1_HUMAN Serine/arginine-rich-splicing factor 10 OS=Homo sapiens GN=SRSF10 PE=1 SV=1;sp|O75494|SRS10_HUMAN Serine/arginine-rich splicing factor 10 OS=Homo sapiens GN=SRSF10 PE=1 SV=1	4	8	8	5	8	8	8	8	8	8	8	8	8	8	8	8	5	5	5	5	5	5	40.1	40.1	33.7	20.913	172	172;262;69;40	0	201.86	By MS/MS	By MS/MS	By MS/MS	By MS/MS	By MS/MS	By MS/MS	40.1	40.1	40.1	40.1	40.1	40.1
O76094;D6RDY6;R4GNC1	O76094;D6RDY6	5;3;1	5;3;1	5;3;1	Signal recognition particle subunit SRP72	SRP72	sp|O76094|SRP72_HUMAN Signal recognition particle subunit SRP72 OS=Homo sapiens GN=SRP72 PE=1 SV=3;tr|D6RDY6|D6RDY6_HUMAN Signal recognition particle subunit SRP72 (Fragment) OS=Homo sapiens GN=SRP72 PE=1 SV=2	3	5	5	5	3	1	3	5	5	3	3	1	3	5	5	3	3	1	3	5	5	3	9.1	9.1	9.1	74.605	671	671;357;220	0	33.769	By matching	By matching	By matching	By MS/MS	By MS/MS	By MS/MS	5.4	1.6	4.6	9.1	9.1	5.7
P00390;H0YC68;E5RI06	P00390	5;2;1	5;2;1	5;2;1	Glutathione reductase, mitochondrial	GSR	sp|P00390|GSHR_HUMAN Glutathione reductase, mitochondrial OS=Homo sapiens GN=GSR PE=1 SV=2	3	5	5	5	4	4	4	5	4	4	4	4	4	5	4	4	4	4	4	5	4	4	11.9	11.9	11.9	56.256	522	522;131;145	0	31.206	By MS/MS	By MS/MS	By MS/MS	By MS/MS	By MS/MS	By MS/MS	9	9	9	11.9	9	9.8
P05141;P12235;V9GYG0;Q9H0C2	P05141	11;5;4;2	11;5;4;2	5;0;0;0	ADP/ATP translocase 2;ADP/ATP translocase 2, N-terminally processed	SLC25A5	sp|P05141|ADT2_HUMAN ADP/ATP translocase 2 OS=Homo sapiens GN=SLC25A5 PE=1 SV=7	4	11	11	5	10	7	9	11	11	10	10	7	9	11	11	10	5	3	4	5	5	4	29.2	29.2	12.8	32.852	298	298;298;208;315	0	76.577	By MS/MS	By MS/MS	By MS/MS	By MS/MS	By MS/MS	By MS/MS	28.5	25.8	28.5	29.2	29.2	29.2
P06748;E5RI98	P06748	5;1	5;1	5;1	Nucleophosmin	NPM1	sp|P06748|NPM_HUMAN Nucleophosmin OS=Homo sapiens GN=NPM1 PE=1 SV=2	2	5	5	5	4	3	4	2	3	2	4	3	4	2	3	2	4	3	4	2	3	2	25.5	25.5	25.5	32.575	294	294;111	0	29.905	By MS/MS	By matching	By MS/MS	By matching	By MS/MS	By MS/MS	22.4	11.9	15	8.8	11.9	5.4
P08708;H0YN88;A0A075B716;H0YN73;H3BNC9	P08708;H0YN88;A0A075B716	5;4;4;2;1	5;4;4;2;1	5;4;4;2;1	40S ribosomal protein S17	RPS17	sp|P08708|RS17_HUMAN 40S ribosomal protein S17 OS=Homo sapiens GN=RPS17 PE=1 SV=2;tr|H0YN88|H0YN88_HUMAN 40S ribosomal protein S17 OS=Homo sapiens GN=RPS17 PE=1 SV=1;tr|A0A075B716|A0A075B716_HUMAN 40S ribosomal protein S17 OS=Homo sapiens GN=RPS17 PE=1 SV=	5	5	5	5	4	3	3	5	5	4	4	3	3	5	5	4	4	3	3	5	5	4	41.5	41.5	41.5	15.55	135	135;136;191;59;293	0	32.247	By matching	By matching	By MS/MS	By MS/MS	By MS/MS	By MS/MS	41.5	32.6	25.2	41.5	41.5	41.5
P11021	P11021	6	5	5	78 kDa glucose-regulated protein	HSPA5	sp|P11021|GRP78_HUMAN 78 kDa glucose-regulated protein OS=Homo sapiens GN=HSPA5 PE=1 SV=2	1	6	5	5	4	2	4	6	5	6	3	1	3	5	4	5	3	1	3	5	4	5	12.5	10.1	10.1	72.332	654	654	0	33.856	By matching	By matching	By matching	By MS/MS	By MS/MS	By MS/MS	8.1	4.6	8.6	12.5	10.2	12.5
P12532;C9JSQ1;F8WCN3;C9JJX8;C9J995;C9J8F6;C9J6W7;C9JT96;P17540	P12532;C9JSQ1;F8WCN3	5;4;4;2;2;2;1;1;1	5;4;4;2;2;2;1;1;1	5;4;4;2;2;2;1;1;1	Creatine kinase U-type, mitochondrial	CKMT1A;CKMT1B	sp|P12532|KCRU_HUMAN Creatine kinase U-type, mitochondrial OS=Homo sapiens GN=CKMT1A PE=1 SV=1;tr|C9JSQ1|C9JSQ1_HUMAN Creatine kinase U-type, mitochondrial (Fragment) OS=Homo sapiens GN=CKMT1B PE=1 SV=1;tr|F8WCN3|F8WCN3_HUMAN Creatine kinase U-type, mitoch	9	5	5	5	1	0	3	5	5	5	1	0	3	5	5	5	1	0	3	5	5	5	14.4	14.4	14.4	47.036	417	417;241;298;103;129;148;203;222;419	0	33.103	By matching		By matching	By MS/MS	By MS/MS	By MS/MS	3.8	0	10.1	14.4	14.4	14.4
P22102;C9JBJ1;C9JTV6;F8WD69;C9JZG2;C9JKQ7;H7C366	P22102;C9JBJ1;C9JTV6;F8WD69;C9JZG2;C9JKQ7	5;4;4;4;3;3;1	5;4;4;4;3;3;1	5;4;4;4;3;3;1	Trifunctional purine biosynthetic protein adenosine-3;Phosphoribosylamine--glycine ligase;Phosphoribosylformylglycinamidine cyclo-ligase;Phosphoribosylglycinamide formyltransferase	GART	sp|P22102|PUR2_HUMAN Trifunctional purine biosynthetic protein adenosine-3 OS=Homo sapiens GN=GART PE=1 SV=1;tr|C9JBJ1|C9JBJ1_HUMAN Trifunctional purine biosynthetic protein adenosine-3 (Fragment) OS=Homo sapiens GN=GART PE=1 SV=7;tr|C9JTV6|C9JTV6_HUMAN Tr	7	5	5	5	4	4	5	5	5	3	4	4	5	5	5	3	4	4	5	5	5	3	6.3	6.3	6.3	107.77	1010	1010;232;241;306;136;138;145	0	41.824	By MS/MS	By matching	By MS/MS	By MS/MS	By MS/MS	By MS/MS	5.4	5.4	6.3	6.3	6.3	3.9
P23193;E5RJ93;E5RIS7;B7Z4S1;A0A0A0MT58;Q15560	P23193;E5RJ93;E5RIS7	5;3;3;1;1;1	5;3;3;1;1;1	5;3;3;1;1;1	Transcription elongation factor A protein 1	TCEA1	sp|P23193|TCEA1_HUMAN Transcription elongation factor A protein 1 OS=Homo sapiens GN=TCEA1 PE=1 SV=2;tr|E5RJ93|E5RJ93_HUMAN Transcription elongation factor A protein 1 OS=Homo sapiens GN=TCEA1 PE=1 SV=1;tr|E5RIS7|E5RIS7_HUMAN Transcription elongation facto	6	5	5	5	0	0	4	4	5	2	0	0	4	4	5	2	0	0	4	4	5	2	17.3	17.3	17.3	33.969	301	301;90;111;117;270;299	0	28.457			By matching	By MS/MS	By MS/MS	By matching	0	0	13.3	13.3	17.3	7.3
P30050	P30050	5	5	5	60S ribosomal protein L12	RPL12	sp|P30050|RL12_HUMAN 60S ribosomal protein L12 OS=Homo sapiens GN=RPL12 PE=1 SV=1	1	5	5	5	4	5	5	5	5	5	4	5	5	5	5	5	4	5	5	5	5	5	45.5	45.5	45.5	17.818	165	165	0	37.509	By matching	By matching	By MS/MS	By MS/MS	By MS/MS	By MS/MS	33.9	45.5	45.5	45.5	45.5	45.5
P46783;F6U211;S4R435;Q9NQ39	P46783;F6U211;S4R435	5;3;3;2	5;3;3;2	5;3;3;2	40S ribosomal protein S10	RPS10;RPS10-NUDT3	sp|P46783|RS10_HUMAN 40S ribosomal protein S10 OS=Homo sapiens GN=RPS10 PE=1 SV=1;tr|F6U211|F6U211_HUMAN 40S ribosomal protein S10 OS=Homo sapiens GN=RPS10 PE=4 SV=1;tr|S4R435|S4R435_HUMAN Protein RPS10-NUDT3 (Fragment) OS=Homo sapiens GN=RPS10-NUDT3 PE=4	4	5	5	5	4	4	5	5	4	4	4	4	5	5	4	4	4	4	5	5	4	4	24.2	24.2	24.2	18.898	165	165;172;286;176	0	40.142	By matching	By MS/MS	By MS/MS	By MS/MS	By MS/MS	By MS/MS	24.2	24.2	24.2	24.2	18.8	24.2
P48047;H7C0C1;H7C086;H7C068	P48047;H7C0C1	5;3;2;1	5;3;2;1	5;3;2;1	ATP synthase subunit O, mitochondrial	ATP5O	sp|P48047|ATPO_HUMAN ATP synthase subunit O, mitochondrial OS=Homo sapiens GN=ATP5O PE=1 SV=1;tr|H7C0C1|H7C0C1_HUMAN Uncharacterized protein (Fragment) OS=Homo sapiens PE=4 SV=2	4	5	5	5	1	2	4	5	5	4	1	2	4	5	5	4	1	2	4	5	5	4	22.1	22.1	22.1	23.277	213	213;242;74;86	0	36.066	By MS/MS	By matching	By MS/MS	By MS/MS	By MS/MS	By MS/MS	5.2	11.7	17.4	22.1	22.1	20.7
P48059;A0A0M3HER1;A0A0J9YXC7;A0A087X2F9;Q7Z4I7;C9JF46	P48059;A0A0M3HER1;A0A0J9YXC7	5;4;4;2;2;1	5;4;4;2;2;1	5;4;4;2;2;1	LIM and senescent cell antigen-like-containing domain protein 1	LIMS1	sp|P48059|LIMS1_HUMAN LIM and senescent cell antigen-like-containing domain protein 1 OS=Homo sapiens GN=LIMS1 PE=1 SV=4;tr|A0A0M3HER1|A0A0M3HER1_HUMAN LIM and senescent cell antigen-like-containing domain protein 1 (Fragment) OS=Homo sapiens GN=LIMS1 PE=1	6	5	5	5	5	4	5	5	5	5	5	4	5	5	5	5	5	4	5	5	5	5	19.4	19.4	19.4	37.251	325	325;209;398;249;341;177	0	31.907	By MS/MS	By MS/MS	By MS/MS	By MS/MS	By MS/MS	By MS/MS	19.4	15.7	19.4	19.4	19.4	19.4
P49756;H0YE46;E9PQU5	P49756	5;1;1	5;1;1	5;1;1	RNA-binding protein 25	RBM25	sp|P49756|RBM25_HUMAN RNA-binding protein 25 OS=Homo sapiens GN=RBM25 PE=1 SV=3	3	5	5	5	3	4	4	4	4	5	3	4	4	4	4	5	3	4	4	4	4	5	6.3	6.3	6.3	100.18	843	843;73;243	0	30.16	By MS/MS	By matching	By matching	By MS/MS	By MS/MS	By MS/MS	3.6	4.5	4.5	4.5	4.5	6.3
P50995;H0Y6E1	P50995	5;2	5;2	5;2	Annexin A11	ANXA11	sp|P50995|ANX11_HUMAN Annexin A11 OS=Homo sapiens GN=ANXA11 PE=1 SV=1	2	5	5	5	2	4	3	4	4	1	2	4	3	4	4	1	2	4	3	4	4	1	11.9	11.9	11.9	54.389	505	505;148	0	29.689	By MS/MS	By matching	By matching	By MS/MS	By MS/MS	By MS/MS	5.1	9.5	6.9	9.9	9.9	2.4
P60866;E5RJX2;E5RIP1;G3XAN0	P60866;E5RJX2;E5RIP1	5;4;3;1	5;4;3;1	5;4;3;1	40S ribosomal protein S20	RPS20	sp|P60866|RS20_HUMAN 40S ribosomal protein S20 OS=Homo sapiens GN=RPS20 PE=1 SV=1;tr|E5RJX2|E5RJX2_HUMAN 40S ribosomal protein S20 OS=Homo sapiens GN=RPS20 PE=1 SV=1;tr|E5RIP1|E5RIP1_HUMAN 40S ribosomal protein S20 OS=Homo sapiens GN=RPS20 PE=1 SV=1	4	5	5	5	4	3	5	5	5	4	4	3	5	5	5	4	4	3	5	5	5	4	31.1	31.1	31.1	13.373	119	119;61;46;64	0	40.906	By MS/MS	By MS/MS	By MS/MS	By MS/MS	By MS/MS	By MS/MS	25.2	15.1	31.1	31.1	31.1	25.2
P67809;A0A087X1S2;H0Y449;C9J5V9	P67809;A0A087X1S2;H0Y449;C9J5V9	10;9;8;5	10;9;8;5	5;4;5;3	Nuclease-sensitive element-binding protein 1	YBX1	sp|P67809|YBOX1_HUMAN Nuclease-sensitive element-binding protein 1 OS=Homo sapiens GN=YBX1 PE=1 SV=3;tr|A0A087X1S2|A0A087X1S2_HUMAN Nuclease-sensitive element-binding protein 1 OS=Homo sapiens GN=YBX1 PE=1 SV=2;tr|H0Y449|H0Y449_HUMAN Nuclease-sensitive ele	4	10	10	5	6	7	7	9	10	8	6	7	7	9	10	8	3	4	4	5	5	4	37.7	37.7	29	35.924	324	324;320;374;216	0	100.69	By matching	By MS/MS	By MS/MS	By MS/MS	By MS/MS	By MS/MS	23.5	28.4	28.4	37.7	37.7	28.4
P68104;A0A087WVQ9;Q5VTE0;A0A087WV01;A6PW80;Q5JR01	P68104;A0A087WVQ9;Q5VTE0;A0A087WV01	13;11;11;7;2;2	13;11;11;7;2;2	5;5;4;2;1;1	Elongation factor 1-alpha 1;Putative elongation factor 1-alpha-like 3;Elongation factor 1-alpha	EEF1A1;EEF1A1P5	sp|P68104|EF1A1_HUMAN Elongation factor 1-alpha 1 OS=Homo sapiens GN=EEF1A1 PE=1 SV=1;tr|A0A087WVQ9|A0A087WVQ9_HUMAN Elongation factor 1-alpha 1 OS=Homo sapiens GN=EEF1A1 PE=1 SV=1;sp|Q5VTE0|EF1A3_HUMAN Putative elongation factor 1-alpha-like 3 OS=Homo sap	6	13	13	5	9	10	12	12	12	13	9	10	12	12	12	13	2	4	4	4	4	5	43.9	43.9	27.7	50.14	462	462;441;462;426;107;145	0	133.53	By MS/MS	By MS/MS	By MS/MS	By MS/MS	By MS/MS	By MS/MS	24.5	36.1	33.1	42.9	33.1	43.9
Q01518;Q5T0R7;Q5T0R6;Q5T0R5;Q5T0R4;Q5T0R3;Q5T0R2;Q5T0R1;Q5T0R9	Q01518;Q5T0R7;Q5T0R6;Q5T0R5;Q5T0R4;Q5T0R3;Q5T0R2;Q5T0R1;Q5T0R9	5;3;3;3;3;3;3;3;3	5;3;3;3;3;3;3;3;3	5;3;3;3;3;3;3;3;3	Adenylyl cyclase-associated protein 1;Adenylyl cyclase-associated protein	CAP1	sp|Q01518|CAP1_HUMAN Adenylyl cyclase-associated protein 1 OS=Homo sapiens GN=CAP1 PE=1 SV=5;tr|Q5T0R7|Q5T0R7_HUMAN Adenylyl cyclase-associated protein (Fragment) OS=Homo sapiens GN=CAP1 PE=1 SV=1;tr|Q5T0R6|Q5T0R6_HUMAN Adenylyl cyclase-associated protein	9	5	5	5	2	0	3	5	5	3	2	0	3	5	5	3	2	0	3	5	5	3	13.1	13.1	13.1	51.901	475	475;174;176;180;202;203;208;215;263	0	32.153	By matching		By MS/MS	By MS/MS	By MS/MS	By MS/MS	5.1	0	7.6	13.1	13.1	7.6
Q07666;Q5VWX1;O75525	Q07666	5;2;1	5;2;1	5;2;1	KH domain-containing, RNA-binding, signal transduction-associated protein 1	KHDRBS1	sp|Q07666|KHDR1_HUMAN KH domain-containing, RNA-binding, signal transduction-associated protein 1 OS=Homo sapiens GN=KHDRBS1 PE=1 SV=1	3	5	5	5	1	1	2	5	5	5	1	1	2	5	5	5	1	1	2	5	5	5	12.6	12.6	12.6	48.227	443	443;349;346	0	32.252	By matching	By matching	By matching	By MS/MS	By MS/MS	By matching	3.2	3.2	5.2	12.6	12.6	12.6
Q12904;D6R937	Q12904	5;2	5;2	5;2	Aminoacyl tRNA synthase complex-interacting multifunctional protein 1;Endothelial monocyte-activating polypeptide 2	AIMP1	sp|Q12904|AIMP1_HUMAN Aminoacyl tRNA synthase complex-interacting multifunctional protein 1 OS=Homo sapiens GN=AIMP1 PE=1 SV=2	2	5	5	5	2	0	4	5	5	5	2	0	4	5	5	5	2	0	4	5	5	5	19.2	19.2	19.2	34.352	312	312;150	0	32.315	By matching		By matching	By MS/MS	By MS/MS	By MS/MS	7.7	0	15.4	19.2	19.2	19.2
Q14204	Q14204	5	5	5	Cytoplasmic dynein 1 heavy chain 1	DYNC1H1	sp|Q14204|DYHC1_HUMAN Cytoplasmic dynein 1 heavy chain 1 OS=Homo sapiens GN=DYNC1H1 PE=1 SV=5	1	5	5	5	4	2	3	5	5	3	4	2	3	5	5	3	4	2	3	5	5	3	1.6	1.6	1.6	532.4	4646	4646	0	30.672	By matching	By matching	By matching	By MS/MS	By MS/MS	By MS/MS	1.4	0.6	1.1	1.6	1.6	0.9
Q15365	Q15365	7	7	5	Poly(rC)-binding protein 1	PCBP1	sp|Q15365|PCBP1_HUMAN Poly(rC)-binding protein 1 OS=Homo sapiens GN=PCBP1 PE=1 SV=2	1	7	7	5	2	2	4	5	5	4	2	2	4	5	5	4	2	2	3	3	4	3	25.8	25.8	20.5	37.497	356	356	0	54.096	By matching	By matching	By MS/MS	By MS/MS	By MS/MS	By MS/MS	11	11	18	18.8	21.1	18
Q15424;K7ES42;K7EII0	Q15424	9;1;1	5;1;1	5;1;1	Scaffold attachment factor B1	SAFB	sp|Q15424|SAFB1_HUMAN Scaffold attachment factor B1 OS=Homo sapiens GN=SAFB PE=1 SV=4	3	9	5	5	7	9	8	6	9	5	3	5	4	4	5	3	3	5	4	4	5	3	13.3	8.3	8.3	102.64	915	915;106;153	0	40.348	By MS/MS	By MS/MS	By MS/MS	By MS/MS	By MS/MS	By MS/MS	11.1	13.3	11.9	9.2	13.3	6
Q8N9T8	Q8N9T8	5	5	5	Protein KRI1 homolog	KRI1	sp|Q8N9T8|KRI1_HUMAN Protein KRI1 homolog OS=Homo sapiens GN=KRI1 PE=1 SV=3	1	5	5	5	5	5	5	5	5	5	5	5	5	5	5	5	5	5	5	5	5	5	7.3	7.3	7.3	82.597	703	703	0	35.324	By MS/MS	By MS/MS	By MS/MS	By MS/MS	By MS/MS	By MS/MS	7.3	7.3	7.3	7.3	7.3	7.3
Q8NAV1	Q8NAV1	5	5	5	Pre-mRNA-splicing factor 38A	PRPF38A	sp|Q8NAV1|PR38A_HUMAN Pre-mRNA-splicing factor 38A OS=Homo sapiens GN=PRPF38A PE=1 SV=1	1	5	5	5	5	2	3	5	4	2	5	2	3	5	4	2	5	2	3	5	4	2	15.1	15.1	15.1	37.476	312	312	0	33.039	By MS/MS	By MS/MS	By MS/MS	By MS/MS	By MS/MS	By MS/MS	15.1	8.3	10.9	15.1	14.7	8.3
Q96CT7;M0R2F5	Q96CT7	5;1	5;1	5;1	Coiled-coil domain-containing protein 124	CCDC124	sp|Q96CT7|CC124_HUMAN Coiled-coil domain-containing protein 124 OS=Homo sapiens GN=CCDC124 PE=1 SV=1	2	5	5	5	3	4	5	5	5	4	3	4	5	5	5	4	3	4	5	5	5	4	29.6	29.6	29.6	25.835	223	223;137	0	33.295	By MS/MS	By matching	By MS/MS	By MS/MS	By MS/MS	By MS/MS	19.3	23.3	29.6	29.6	29.6	23.8
Q9HB71	Q9HB71	5	5	5	Calcyclin-binding protein	CACYBP	sp|Q9HB71|CYBP_HUMAN Calcyclin-binding protein OS=Homo sapiens GN=CACYBP PE=1 SV=2	1	5	5	5	3	4	3	5	5	5	3	4	3	5	5	5	3	4	3	5	5	5	36.8	36.8	36.8	26.21	228	228	0	30.858	By MS/MS	By matching	By MS/MS	By MS/MS	By MS/MS	By MS/MS	18.9	27.6	23.7	36.8	36.8	36.8
Q9NPJ6;Q5T911	Q9NPJ6;Q5T911	5;4	5;4	5;4	Mediator of RNA polymerase II transcription subunit 4	MED4	sp|Q9NPJ6|MED4_HUMAN Mediator of RNA polymerase II transcription subunit 4 OS=Homo sapiens GN=MED4 PE=1 SV=1;tr|Q5T911|Q5T911_HUMAN Mediator of RNA polymerase II transcription subunit 4 (Fragment) OS=Homo sapiens GN=MED4 PE=1 SV=1	2	5	5	5	4	4	4	5	5	3	4	4	4	5	5	3	4	4	4	5	5	3	24.4	24.4	24.4	29.745	270	270;238	0	31.703	By matching	By MS/MS	By MS/MS	By MS/MS	By MS/MS	By MS/MS	18.1	20.7	18.1	24.4	24.4	14.4
Q9UKJ3	Q9UKJ3	5	5	5	G patch domain-containing protein 8	GPATCH8	sp|Q9UKJ3|GPTC8_HUMAN G patch domain-containing protein 8 OS=Homo sapiens GN=GPATCH8 PE=1 SV=2	1	5	5	5	5	5	5	5	5	5	5	5	5	5	5	5	5	5	5	5	5	5	4.6	4.6	4.6	164.2	1502	1502	0	30.683	By MS/MS	By MS/MS	By MS/MS	By MS/MS	By MS/MS	By MS/MS	4.6	4.6	4.6	4.6	4.6	4.6
Q9Y265;E7ETR0	Q9Y265	5;2	5;2	5;2	RuvB-like 1	RUVBL1	sp|Q9Y265|RUVB1_HUMAN RuvB-like 1 OS=Homo sapiens GN=RUVBL1 PE=1 SV=1	2	5	5	5	2	1	2	2	4	4	2	1	2	2	4	4	2	1	2	2	4	4	12.7	12.7	12.7	50.227	456	456;315	0	29.966	By matching	By matching	By MS/MS	By MS/MS	By MS/MS	By MS/MS	5	2.4	5.3	5	10.3	10.3
Q9Y5X3;A0A087WUY5;Q5QPE4;Q5QPE5	Q9Y5X3	6;2;2;2	6;2;2;2	5;2;1;1	Sorting nexin-5	SNX5	sp|Q9Y5X3|SNX5_HUMAN Sorting nexin-5 OS=Homo sapiens GN=SNX5 PE=1 SV=1	4	6	6	5	3	3	5	6	6	4	3	3	5	6	6	4	3	3	4	5	5	3	16.1	16.1	13.6	46.816	404	404;170;231;269	0	42.522	By MS/MS	By MS/MS	By matching	By MS/MS	By MS/MS	By MS/MS	8.4	8.4	13.4	16.1	16.1	10.9
A0A087WVQ6;Q00610;J3KS13	A0A087WVQ6;Q00610	4;4;1	4;4;1	4;4;1	Clathrin heavy chain;Clathrin heavy chain 1	CLTC	tr|A0A087WVQ6|A0A087WVQ6_HUMAN Clathrin heavy chain OS=Homo sapiens GN=CLTC PE=1 SV=1;sp|Q00610|CLH1_HUMAN Clathrin heavy chain 1 OS=Homo sapiens GN=CLTC PE=1 SV=5	3	4	4	4	4	4	3	4	4	4	4	4	3	4	4	4	4	4	3	4	4	4	3	3	3	192.06	1679	1679;1675;612	0	27.771	By MS/MS	By MS/MS	By MS/MS	By MS/MS	By MS/MS	By MS/MS	3	3	2.3	3	3	3
A0A087WWY3;Q5HY54;Q60FE5;P21333	A0A087WWY3;Q5HY54;Q60FE5;P21333	5;5;5;5	4;4;4;4	4;4;4;4	Filamin-A	FLNA	tr|A0A087WWY3|A0A087WWY3_HUMAN Filamin-A OS=Homo sapiens GN=FLNA PE=1 SV=1;tr|Q5HY54|Q5HY54_HUMAN Filamin-A OS=Homo sapiens GN=FLNA PE=1 SV=1;tr|Q60FE5|Q60FE5_HUMAN Filamin A OS=Homo sapiens GN=FLNA PE=1 SV=1;sp|P21333|FLNA_HUMAN Filamin-A OS=Homo sapiens	4	5	4	4	3	4	4	5	4	4	3	4	4	4	3	4	3	4	4	4	3	4	2.9	2.5	2.5	245.85	2315	2315;2607;2620;2647	0	23.675	By matching	By matching	By matching	By MS/MS	By MS/MS	By MS/MS	1.9	2.5	2.5	2.9	2.4	2.5
A0A087WYV3;E7EPF0;A0A0D9SEW3;A0A087WXF8;Q9NP64;A0A087WXU5	A0A087WYV3;E7EPF0;A0A0D9SEW3;A0A087WXF8;Q9NP64;A0A087WXU5	4;4;4;4;4;3	4;4;4;4;4;3	4;4;4;4;4;3	Nucleolar protein of 40 kDa	ZCCHC17	tr|A0A087WYV3|A0A087WYV3_HUMAN Nucleolar protein of 40 kDa OS=Homo sapiens GN=ZCCHC17 PE=1 SV=1;tr|E7EPF0|E7EPF0_HUMAN Nucleolar protein of 40 kDa OS=Homo sapiens GN=ZCCHC17 PE=1 SV=2;tr|A0A0D9SEW3|A0A0D9SEW3_HUMAN Nucleolar protein of 40 kDa OS=Homo sapie	6	4	4	4	4	3	2	3	2	1	4	3	2	3	2	1	4	3	2	3	2	1	25.7	25.7	25.7	20.451	179	179;212;243;263;241;146	0	25.282	By MS/MS	By matching	By matching	By MS/MS	By MS/MS	By matching	25.7	17.9	12.3	17.9	12.3	7.3
D6R9P3;D6RD18;D6RBZ0;A0A087WZV1;Q99729	D6R9P3;D6RD18;D6RBZ0;A0A087WZV1;Q99729	4;4;4;4;3	4;4;4;4;3	4;4;4;4;3	Heterogeneous nuclear ribonucleoprotein A/B	HNRNPAB	tr|D6R9P3|D6R9P3_HUMAN Heterogeneous nuclear ribonucleoprotein A/B OS=Homo sapiens GN=HNRNPAB PE=1 SV=1;tr|D6RD18|D6RD18_HUMAN Heterogeneous nuclear ribonucleoprotein A/B OS=Homo sapiens GN=HNRNPAB PE=1 SV=1;tr|D6RBZ0|D6RBZ0_HUMAN Heterogeneous nuclear rib	5	4	4	4	2	3	3	4	4	4	2	3	3	4	4	4	2	3	3	4	4	4	15.4	15.4	15.4	30.302	280	280;283;327;330;332	0	30.39	By matching	By matching	By MS/MS	By MS/MS	By MS/MS	By MS/MS	9.6	10.7	10.7	15.4	15.4	15.4
A0A0R4J2E8;A8MXP9;P43243;D6R991;D6REM6;Q68E03;D6RB45;D6R9F3;D6RBS2;D6RCM3;D6REK4;D6R8Z5;B3KM87	A0A0R4J2E8;A8MXP9;P43243;D6R991;D6REM6;Q68E03	4;4;4;3;3;2;1;1;1;1;1;1;1	4;4;4;3;3;2;1;1;1;1;1;1;1	4;4;4;3;3;2;1;1;1;1;1;1;1	Matrin-3	MATR3;DKFZp686L22104	tr|A0A0R4J2E8|A0A0R4J2E8_HUMAN Matrin-3 OS=Homo sapiens GN=MATR3 PE=1 SV=1;tr|A8MXP9|A8MXP9_HUMAN Matrin-3 OS=Homo sapiens GN=MATR3 PE=1 SV=1;sp|P43243|MATR3_HUMAN Matrin-3 OS=Homo sapiens GN=MATR3 PE=1 SV=2;tr|D6R991|D6R991_HUMAN Matrin-3 (Fragment) OS=Ho	13	4	4	4	2	3	3	4	4	3	2	3	3	4	4	3	2	3	3	4	4	3	5.7	5.7	5.7	94.622	847	847;895;847;433;794;283;47;78;87;99;100;107;509	0	25.981	By matching	By matching	By matching	By MS/MS	By MS/MS	By MS/MS	2.4	4.1	4.1	5.7	5.7	4.1
A8MQ02;J3KN01;P55196;Q5TIG5;H0Y948;F8W9I4;E9PFY5;H0Y8L4;H0Y7R8	A8MQ02;J3KN01;P55196;Q5TIG5	4;4;4;3;1;1;1;1;1	4;4;4;3;1;1;1;1;1	4;4;4;3;1;1;1;1;1	Afadin	MLLT4	tr|A8MQ02|A8MQ02_HUMAN Afadin OS=Homo sapiens GN=MLLT4 PE=1 SV=2;tr|J3KN01|J3KN01_HUMAN Afadin OS=Homo sapiens GN=MLLT4 PE=1 SV=1;sp|P55196|AFAD_HUMAN Afadin OS=Homo sapiens GN=MLLT4 PE=1 SV=3;tr|Q5TIG5|Q5TIG5_HUMAN Afadin OS=Homo sapiens GN=MLLT4 PE=1 SV=	9	4	4	4	3	4	4	4	4	3	3	4	4	4	4	3	3	4	4	4	4	3	3	3	3	201.8	1781	1781;1831;1824;1665;191;247;250;313;389	0	24.502	By matching	By matching	By matching	By MS/MS	By MS/MS	By MS/MS	2.3	3	3	3	3	2.3
B0QYA5;O15371;B0QYA8;B0QYA6;B0QYA4	B0QYA5;O15371;B0QYA8;B0QYA6	4;4;2;2;1	4;4;2;2;1	4;4;2;2;1	Eukaryotic translation initiation factor 3 subunit D	EIF3D	tr|B0QYA5|B0QYA5_HUMAN Eukaryotic translation initiation factor 3 subunit D (Fragment) OS=Homo sapiens GN=EIF3D PE=1 SV=1;sp|O15371|EIF3D_HUMAN Eukaryotic translation initiation factor 3 subunit D OS=Homo sapiens GN=EIF3D PE=1 SV=1;tr|B0QYA8|B0QYA8_HUMAN E	5	4	4	4	1	1	3	3	3	0	1	1	3	3	3	0	1	1	3	3	3	0	13.8	13.8	13.8	31.729	269	269;548;123;173;105	0	26.207	By matching	By matching	By MS/MS	By MS/MS	By MS/MS		3.7	4.5	8.6	13.4	13.4	0
B0YJC4;P08670;B0YJC5;H7C5W5;P41219;Q5JVS8;F8W835	B0YJC4;P08670;B0YJC5;H7C5W5;P41219	4;4;3;2;2;1;1	4;4;3;2;2;1;1	4;4;3;2;2;1;1	Vimentin;Peripherin	VIM;PRPH	tr|B0YJC4|B0YJC4_HUMAN Vimentin OS=Homo sapiens GN=VIM PE=1 SV=1;sp|P08670|VIME_HUMAN Vimentin OS=Homo sapiens GN=VIM PE=1 SV=4;tr|B0YJC5|B0YJC5_HUMAN Vimentin OS=Homo sapiens GN=VIM PE=1 SV=1;tr|H7C5W5|H7C5W5_HUMAN Peripherin (Fragment) OS=Homo sapiens GN	7	4	4	4	4	1	2	0	1	0	4	1	2	0	1	0	4	1	2	0	1	0	13.7	13.7	13.7	49.653	431	431;466;228;200;470;173;207	0	29.575	By MS/MS	By MS/MS	By MS/MS		By matching		13.7	4.4	6.7	0	4.4	0
B1ANR0;Q13310;H0Y5F5;B1ANR1;H0YEQ8;H0YCC8;H0YEU6	B1ANR0;Q13310;H0Y5F5	11;11;6;5;4;3;3	5;5;3;2;1;1;2	4;4;3;1;0;1;2	Polyadenylate-binding protein;Polyadenylate-binding protein 4	PABPC4	tr|B1ANR0|B1ANR0_HUMAN Polyadenylate-binding protein OS=Homo sapiens GN=PABPC4 PE=1 SV=1;sp|Q13310|PABP4_HUMAN Polyadenylate-binding protein 4 OS=Homo sapiens GN=PABPC4 PE=1 SV=1;tr|H0Y5F5|H0Y5F5_HUMAN Polyadenylate-binding protein (Fragment) OS=Homo sapie	7	11	5	4	5	5	6	8	11	9	1	1	2	3	5	4	1	1	2	3	4	4	21.1	9.1	7.6	67.97	615	615;644;550;129;112;197;249	0	28.021	By matching	By matching	By matching	By MS/MS	By MS/MS	By MS/MS	10.2	10.9	12.7	15.8	21.1	17.7
B7Z9I1;Q5T4U5;P11310;E9PJM9	B7Z9I1;Q5T4U5;P11310	4;4;4;1	4;4;4;1	4;4;4;1	Medium-chain specific acyl-CoA dehydrogenase, mitochondrial	ACADM	tr|B7Z9I1|B7Z9I1_HUMAN Medium-chain-specific acyl-CoA dehydrogenase, mitochondrial OS=Homo sapiens GN=ACADM PE=1 SV=1;tr|Q5T4U5|Q5T4U5_HUMAN Acyl-Coenzyme A dehydrogenase, C-4 to C-12 straight chain, isoform CRA_a OS=Homo sapiens GN=ACADM PE=1 SV=1;sp|P113	4	4	4	4	1	0	4	4	3	4	1	0	4	4	3	4	1	0	4	4	3	4	11.4	11.4	11.4	42.426	385	385;454;421;104	0	24.085	By matching		By MS/MS	By MS/MS	By MS/MS	By matching	3.4	0	11.4	11.4	8.8	11.4
B8ZZL8;P61604;S4R3N1;B8ZZ54	B8ZZL8;P61604;S4R3N1	4;4;3;1	4;4;3;1	4;4;3;1	10 kDa heat shock protein, mitochondrial	HSPE1;HSPE1-MOB4	tr|B8ZZL8|B8ZZL8_HUMAN 10 kDa heat shock protein, mitochondrial OS=Homo sapiens GN=HSPE1 PE=1 SV=1;sp|P61604|CH10_HUMAN 10 kDa heat shock protein, mitochondrial OS=Homo sapiens GN=HSPE1 PE=1 SV=2;tr|S4R3N1|S4R3N1_HUMAN Protein HSPE1-MOB4 OS=Homo sapiens GN	4	4	4	4	2	2	3	3	3	4	2	2	3	3	3	4	2	2	3	3	3	4	37.6	37.6	37.6	10.689	101	101;102;261;47	0	26.13	By MS/MS	By matching	By MS/MS	By MS/MS	By MS/MS	By MS/MS	20.8	23.8	30.7	30.7	30.7	37.6
C9K025;P18077;F8WBS5;F8WB72	C9K025;P18077;F8WBS5;F8WB72	4;4;3;3	4;4;3;3	4;4;3;3	60S ribosomal protein L35a	RPL35A	tr|C9K025|C9K025_HUMAN 60S ribosomal protein L35a (Fragment) OS=Homo sapiens GN=RPL35A PE=1 SV=1;sp|P18077|RL35A_HUMAN 60S ribosomal protein L35a OS=Homo sapiens GN=RPL35A PE=1 SV=2;tr|F8WBS5|F8WBS5_HUMAN 60S ribosomal protein L35a OS=Homo sapiens GN=RPL35	4	4	4	4	2	1	2	4	4	3	2	1	2	4	4	3	2	1	2	4	4	3	41.5	41.5	41.5	10.645	94	94;110;55;57	0	40.941	By matching	By MS/MS	By MS/MS	By MS/MS	By MS/MS	By MS/MS	18.1	10.6	19.1	41.5	41.5	26.6
D6RFX4;D6RHH4;D6R9Z1;D6R9L0;P63244;D6RBD0;H0YAF8;D6RFZ9;J3KPE3;H0Y8W2;D6RAU2;E9PD14;H0YAM7;D6RAC2;D6REE5;D6RGK8;D6R909;H0Y8R5	D6RFX4;D6RHH4;D6R9Z1;D6R9L0;P63244;D6RBD0;H0YAF8;D6RFZ9;J3KPE3;H0Y8W2;D6RAU2;E9PD14;H0YAM7;D6RAC2;D6REE5	4;4;4;4;4;3;3;3;3;3;2;2;2;2;2;1;1;1	4;4;4;4;4;3;3;3;3;3;2;2;2;2;2;1;1;1	4;4;4;4;4;3;3;3;3;3;2;2;2;2;2;1;1;1	Guanine nucleotide-binding protein subunit beta-2-like 1;Guanine nucleotide-binding protein subunit beta-2-like 1, N-terminally processed	GNB2L1	tr|D6RFX4|D6RFX4_HUMAN Receptor of-activated protein C kinase 1 (Fragment) OS=Homo sapiens GN=RACK1 PE=1 SV=1;tr|D6RHH4|D6RHH4_HUMAN Receptor of-activated protein C kinase 1 OS=Homo sapiens GN=RACK1 PE=1 SV=1;tr|D6R9Z1|D6R9Z1_HUMAN Receptor of-activated pr	18	4	4	4	1	0	1	3	2	1	1	0	1	3	2	1	1	0	1	3	2	1	27.8	27.8	27.8	21.449	194	194;233;237;300;317;160;198;198;273;274;147;153;247;269;321;71;116;138	0	22.15	By MS/MS		By matching	By MS/MS	By matching	By MS/MS	8.2	0	8.2	19.1	17	8.8
E5RG17;Q6P1N9;H0YBX2;G5EA19;U3KQS5;E5RID7;E5RI69;E5RJY6;E5RK70;E5RGF2;A0A0D9SGD3	E5RG17;Q6P1N9;H0YBX2;G5EA19;U3KQS5;E5RID7	4;4;3;3;3;2;1;1;1;1;1	4;4;3;3;3;2;1;1;1;1;1	4;4;3;3;3;2;1;1;1;1;1	Putative deoxyribonuclease TATDN1	TATDN1	tr|E5RG17|E5RG17_HUMAN Putative deoxyribonuclease TATDN1 (Fragment) OS=Homo sapiens GN=TATDN1 PE=1 SV=1;sp|Q6P1N9|TATD1_HUMAN Putative deoxyribonuclease TATDN1 OS=Homo sapiens GN=TATDN1 PE=1 SV=2;tr|H0YBX2|H0YBX2_HUMAN Putative deoxyribonuclease TATDN1 (Fr	11	4	4	4	4	4	3	3	3	4	4	4	3	3	3	4	4	4	3	3	3	4	18	18	18	36.418	322	322;297;202;207;210;62;56;75;110;210;243	0	24.661	By MS/MS	By MS/MS	By matching	By MS/MS	By MS/MS	By MS/MS	18	18	11.2	14	14	18
E9PEB5;Q96AE4;C9JSZ1	E9PEB5;Q96AE4;C9JSZ1	4;4;2	4;4;2	4;4;2	Far upstream element-binding protein 1	FUBP1	tr|E9PEB5|E9PEB5_HUMAN Far upstream element-binding protein 1 OS=Homo sapiens GN=FUBP1 PE=1 SV=1;sp|Q96AE4|FUBP1_HUMAN Far upstream element-binding protein 1 OS=Homo sapiens GN=FUBP1 PE=1 SV=3;tr|C9JSZ1|C9JSZ1_HUMAN Far upstream element-binding protein 1 (	3	4	4	4	0	1	3	4	3	3	0	1	3	4	3	3	0	1	3	4	3	3	7.8	7.8	7.8	68.903	655	655;644;232	0	22.789		By matching	By MS/MS	By MS/MS	By MS/MS	By MS/MS	0	2	6	7.8	6	6
E9PR30;P62861	E9PR30;P62861	4;4	4;4	4;4	40S ribosomal protein S30	FAU	tr|E9PR30|E9PR30_HUMAN 40S ribosomal protein S30 OS=Homo sapiens GN=FAU PE=1 SV=1;sp|P62861|RS30_HUMAN 40S ribosomal protein S30 OS=Homo sapiens GN=FAU PE=1 SV=1	2	4	4	4	3	3	4	4	4	4	3	3	4	4	4	4	3	3	4	4	4	4	12.2	12.2	12.2	10.905	98	98;59	0	30.817	By MS/MS	By MS/MS	By MS/MS	By MS/MS	By MS/MS	By MS/MS	12.2	12.2	12.2	12.2	12.2	12.2
H7C4H2;Q9Y5M8	H7C4H2;Q9Y5M8	4;4	4;4	4;4	Signal recognition particle receptor subunit beta	SRPRB	tr|H7C4H2|H7C4H2_HUMAN Signal recognition particle receptor subunit beta (Fragment) OS=Homo sapiens GN=SRPRB PE=1 SV=1;sp|Q9Y5M8|SRPRB_HUMAN Signal recognition particle receptor subunit beta OS=Homo sapiens GN=SRPRB PE=1 SV=3	2	4	4	4	4	1	3	4	4	2	4	1	3	4	4	2	4	1	3	4	4	2	29.4	29.4	29.4	17.502	160	160;271	0	24.679	By matching	By matching	By matching	By MS/MS	By MS/MS	By MS/MS	29.4	12.5	24.4	29.4	29.4	17.5
J3QLL0;J3KS65;P52292;J3QL07	J3QLL0;J3KS65;P52292	4;4;4;1	4;4;4;1	4;4;4;1	Importin subunit alpha-1	KPNA2	tr|J3QLL0|J3QLL0_HUMAN Importin subunit alpha-1 (Fragment) OS=Homo sapiens GN=KPNA2 PE=1 SV=1;tr|J3KS65|J3KS65_HUMAN Importin subunit alpha-1 (Fragment) OS=Homo sapiens GN=KPNA2 PE=1 SV=1;sp|P52292|IMA1_HUMAN Importin subunit alpha-1 OS=Homo sapiens GN=KPN	4	4	4	4	4	3	4	3	4	4	4	3	4	3	4	4	4	3	4	3	4	4	41.8	41.8	41.8	15.234	134	134;143;529;50	0	33.103	By MS/MS	By matching	By MS/MS	By MS/MS	By MS/MS	By MS/MS	41.8	32.8	41.8	32.8	41.8	41.8
M0R3H0;M0R210;P62249;M0QX76;M0R1M5;A0A087WZ27;Q6IPX4	M0R3H0;M0R210;P62249;M0QX76;M0R1M5;A0A087WZ27;Q6IPX4	4;4;4;3;3;3;3	4;4;4;3;3;3;3	4;4;4;3;3;3;3	40S ribosomal protein S16	RPS16;ZNF90	tr|M0R3H0|M0R3H0_HUMAN 40S ribosomal protein S16 OS=Homo sapiens GN=RPS16 PE=1 SV=1;tr|M0R210|M0R210_HUMAN 40S ribosomal protein S16 OS=Homo sapiens GN=RPS16 PE=1 SV=1;sp|P62249|RS16_HUMAN 40S ribosomal protein S16 OS=Homo sapiens GN=RPS16 PE=1 SV=2;tr|M0Q	7	4	4	4	1	4	4	4	4	4	1	4	4	4	4	4	1	4	4	4	4	4	45	45	45	11.075	100	100;129;146;50;85;129;152	0	29.68	By MS/MS	By MS/MS	By MS/MS	By MS/MS	By MS/MS	By MS/MS	10	45	45	45	45	45
O00151	O00151	4	4	4	PDZ and LIM domain protein 1	PDLIM1	sp|O00151|PDLI1_HUMAN PDZ and LIM domain protein 1 OS=Homo sapiens GN=PDLIM1 PE=1 SV=4	1	4	4	4	1	2	3	4	4	3	1	2	3	4	4	3	1	2	3	4	4	3	21.6	21.6	21.6	36.071	329	329	0	24.983	By matching	By matching	By matching	By MS/MS	By MS/MS	By MS/MS	7.9	13.7	15.8	21.6	21.6	15.8
O14776;G3V220	O14776;G3V220	4;2	4;2	4;2	Transcription elongation regulator 1	TCERG1	sp|O14776|TCRG1_HUMAN Transcription elongation regulator 1 OS=Homo sapiens GN=TCERG1 PE=1 SV=2;tr|G3V220|G3V220_HUMAN Transcription elongation regulator 1 OS=Homo sapiens GN=TCERG1 PE=1 SV=1	2	4	4	4	2	3	3	4	3	2	2	3	3	4	3	2	2	3	3	4	3	2	4.3	4.3	4.3	123.9	1098	1098;1032	0	25.603	By matching	By matching	By MS/MS	By MS/MS	By MS/MS	By MS/MS	2.4	3.3	3.3	4.3	3.4	2.3
O43707;H7C144;F5GXS2;H9KV75;P12814;H0YJ11;H0YJW3;H7C5W8;G3V2X9;G3V2W4;G3V2N5;A0A087WSZ2;P35609;Q08043	O43707;H7C144;F5GXS2;H9KV75;P12814;H0YJ11;H0YJW3;H7C5W8	4;3;3;3;3;2;2;2;1;1;1;1;1;1	4;3;3;3;3;2;2;2;1;1;1;1;1;1	4;3;3;3;3;2;2;2;1;1;1;1;1;1	Alpha-actinin-4;Alpha-actinin-1	ACTN4;ACTN1	sp|O43707|ACTN4_HUMAN Alpha-actinin-4 OS=Homo sapiens GN=ACTN4 PE=1 SV=2;tr|H7C144|H7C144_HUMAN Alpha-actinin-4 (Fragment) OS=Homo sapiens GN=ACTN4 PE=1 SV=1;tr|F5GXS2|F5GXS2_HUMAN Alpha-actinin-4 OS=Homo sapiens GN=ACTN4 PE=1 SV=2;tr|H9KV75|H9KV75_HUMAN A	14	4	4	4	2	2	2	3	4	4	2	2	2	3	4	4	2	2	2	3	4	4	5.6	5.6	5.6	104.85	911	911;342;521;822;892;207;251;297;144;238;261;944;894;901	0	25.116	By matching	By matching	By matching	By MS/MS	By MS/MS	By MS/MS	3	3	3	4.3	5.6	5.6
O60506;B7Z645;F6UXX1	O60506;B7Z645;F6UXX1	8;6;4	8;6;4	4;3;1	Heterogeneous nuclear ribonucleoprotein Q	SYNCRIP	sp|O60506|HNRPQ_HUMAN Heterogeneous nuclear ribonucleoprotein Q OS=Homo sapiens GN=SYNCRIP PE=1 SV=2;tr|B7Z645|B7Z645_HUMAN Heterogeneous nuclear ribonucleoprotein Q OS=Homo sapiens GN=SYNCRIP PE=1 SV=1;tr|F6UXX1|F6UXX1_HUMAN Heterogeneous nuclear ribonucl	3	8	8	4	7	8	8	7	7	7	7	8	8	7	7	7	4	4	4	4	4	4	14	14	9.1	69.602	623	623;464;185	0	51.002	By MS/MS	By MS/MS	By MS/MS	By MS/MS	By MS/MS	By MS/MS	12.7	14	14	13.8	13.8	13.8
O60869	O60869	4	4	4	Endothelial differentiation-related factor 1	EDF1	sp|O60869|EDF1_HUMAN Endothelial differentiation-related factor 1 OS=Homo sapiens GN=EDF1 PE=1 SV=1	1	4	4	4	4	3	4	4	4	4	4	3	4	4	4	4	4	3	4	4	4	4	31.8	31.8	31.8	16.368	148	148	0	28.38	By matching	By MS/MS	By MS/MS	By MS/MS	By MS/MS	By MS/MS	31.8	25	31.8	31.8	31.8	31.8
O75369;E7EN95;F8WE98;Q14315	O75369;E7EN95	5;4;1;1	5;4;1;1	4;4;0;0	Filamin-B	FLNB	sp|O75369|FLNB_HUMAN Filamin-B OS=Homo sapiens GN=FLNB PE=1 SV=2;tr|E7EN95|E7EN95_HUMAN Filamin-B OS=Homo sapiens GN=FLNB PE=1 SV=1	4	5	5	4	2	2	3	5	4	4	2	2	3	5	4	4	2	2	3	4	3	4	2.1	2.1	1.7	278.16	2602	2602;2409;604;2725	0	30.508	By matching	By MS/MS	By MS/MS	By MS/MS	By MS/MS	By MS/MS	0.8	0.8	1.3	2.1	1.7	1.7
O75396;A0A087X1A9	O75396;A0A087X1A9	4;2	4;2	4;2	Vesicle-trafficking protein SEC22b	SEC22B	sp|O75396|SC22B_HUMAN Vesicle-trafficking protein SEC22b OS=Homo sapiens GN=SEC22B PE=1 SV=4;tr|A0A087X1A9|A0A087X1A9_HUMAN Vesicle-trafficking protein SEC22b (Fragment) OS=Homo sapiens GN=SEC22B PE=1 SV=1	2	4	4	4	2	1	1	3	2	2	2	1	1	3	2	2	2	1	1	3	2	2	20.5	20.5	20.5	24.593	215	215;79	0	32.287	By MS/MS	By matching	By MS/MS	By MS/MS	By MS/MS	By MS/MS	10.2	6.5	3.7	14.9	9.3	10.2
O75533	O75533	4	4	4	Splicing factor 3B subunit 1	SF3B1	sp|O75533|SF3B1_HUMAN Splicing factor 3B subunit 1 OS=Homo sapiens GN=SF3B1 PE=1 SV=3	1	4	4	4	2	3	3	3	3	3	2	3	3	3	3	3	2	3	3	3	3	3	5.1	5.1	5.1	145.83	1304	1304	0	27.452	By MS/MS	By matching	By MS/MS	By MS/MS	By MS/MS	By MS/MS	2.5	3.9	3.6	3.6	3.6	3.6
O95801	O95801	4	4	4	Tetratricopeptide repeat protein 4	TTC4	sp|O95801|TTC4_HUMAN Tetratricopeptide repeat protein 4 OS=Homo sapiens GN=TTC4 PE=1 SV=3	1	4	4	4	2	4	3	3	3	3	2	4	3	3	3	3	2	4	3	3	3	3	9.8	9.8	9.8	44.678	387	387	0	24.115	By MS/MS	By matching	By MS/MS	By MS/MS	By MS/MS	By MS/MS	5.7	9.8	9.3	7	7	9.3
P10412;P16402;Q02539;P16401;P22492	P10412;P16402	17;14;8;5;4	17;14;8;5;4	4;1;0;0;0	Histone H1.4;Histone H1.3	HIST1H1E;HIST1H1D	sp|P10412|H14_HUMAN Histone H1.4 OS=Homo sapiens GN=HIST1H1E PE=1 SV=2;sp|P16402|H13_HUMAN Histone H1.3 OS=Homo sapiens GN=HIST1H1D PE=1 SV=2	5	17	17	4	16	16	16	15	17	15	16	16	16	15	17	15	3	3	3	3	4	3	40.6	40.6	16	21.865	219	219;221;215;226;207	0	257.89	By MS/MS	By MS/MS	By MS/MS	By MS/MS	By MS/MS	By MS/MS	40.6	40.2	40.6	38.4	40.6	38.8
P12004	P12004	4	4	4	Proliferating cell nuclear antigen	PCNA	sp|P12004|PCNA_HUMAN Proliferating cell nuclear antigen OS=Homo sapiens GN=PCNA PE=1 SV=1	1	4	4	4	2	1	2	3	4	4	2	1	2	3	4	4	2	1	2	3	4	4	18.8	18.8	18.8	28.768	261	261	0	28.997	By MS/MS	By matching	By matching	By MS/MS	By MS/MS	By MS/MS	8	3.1	8.8	13.8	18.8	18.8
P17987;E7ERF2;F5GYL4;F5GZI8;F5GZ03;F5H282;E7EQR6	P17987;E7ERF2;F5GYL4;F5GZI8;F5GZ03;F5H282;E7EQR6	4;3;2;2;2;2;2	4;3;2;2;2;2;2	4;3;2;2;2;2;2	T-complex protein 1 subunit alpha	TCP1	sp|P17987|TCPA_HUMAN T-complex protein 1 subunit alpha OS=Homo sapiens GN=TCP1 PE=1 SV=1;tr|E7ERF2|E7ERF2_HUMAN T-complex protein 1 subunit alpha OS=Homo sapiens GN=TCP1 PE=1 SV=1;tr|F5GYL4|F5GYL4_HUMAN T-complex protein 1 subunit alpha OS=Homo sapiens GN=	7	4	4	4	2	2	3	3	3	3	2	2	3	3	3	3	2	2	3	3	3	3	8.6	8.6	8.6	60.343	556	556;433;65;100;221;332;401	0	26.367	By matching	By matching	By matching	By MS/MS	By MS/MS	By MS/MS	4.5	4.7	6.7	6.5	6.7	6.5
P20042	P20042	4	4	4	Eukaryotic translation initiation factor 2 subunit 2	EIF2S2	sp|P20042|IF2B_HUMAN Eukaryotic translation initiation factor 2 subunit 2 OS=Homo sapiens GN=EIF2S2 PE=1 SV=2	1	4	4	4	4	3	3	4	4	2	4	3	3	4	4	2	4	3	3	4	4	2	12	12	12	38.388	333	333	0	25.249	By MS/MS	By MS/MS	By MS/MS	By MS/MS	By MS/MS	By MS/MS	12	9	9	12	12	6.6
P23284	P23284	4	4	4	Peptidyl-prolyl cis-trans isomerase B	PPIB	sp|P23284|PPIB_HUMAN Peptidyl-prolyl cis-trans isomerase B OS=Homo sapiens GN=PPIB PE=1 SV=2	1	4	4	4	1	1	1	4	4	3	1	1	1	4	4	3	1	1	1	4	4	3	24.1	24.1	24.1	23.742	216	216	0	31.713	By matching	By matching	By MS/MS	By MS/MS	By MS/MS	By MS/MS	6	5.1	5.1	24.1	24.1	18.1
P27824;H0Y9Q7;D6RFL1;H0Y9H1;D6RGY2;D6RAQ8;D6RAU8;D6RB85;D6RDP7	P27824;H0Y9Q7;D6RFL1;H0Y9H1;D6RGY2	4;3;2;2;2;1;1;1;1	4;3;2;2;2;1;1;1;1	4;3;2;2;2;1;1;1;1	Calnexin	CANX	sp|P27824|CALX_HUMAN Calnexin OS=Homo sapiens GN=CANX PE=1 SV=2;tr|H0Y9Q7|H0Y9Q7_HUMAN Calnexin (Fragment) OS=Homo sapiens GN=CANX PE=1 SV=1;tr|D6RFL1|D6RFL1_HUMAN Calnexin (Fragment) OS=Homo sapiens GN=CANX PE=1 SV=1;tr|H0Y9H1|H0Y9H1_HUMAN Calnexin (Fragm	9	4	4	4	4	0	1	4	4	3	4	0	1	4	4	3	4	0	1	4	4	3	9.5	9.5	9.5	67.567	592	592;170;131;190;308;107;134;144;168	0	26.129	By matching		By matching	By MS/MS	By MS/MS	By MS/MS	9.5	0	1.7	9.5	9.5	7.6
P31949	P31949	4	4	4	Protein S100-A11;Protein S100-A11, N-terminally processed	S100A11	sp|P31949|S10AB_HUMAN Protein S100-A11 OS=Homo sapiens GN=S100A11 PE=1 SV=2	1	4	4	4	4	3	4	4	4	4	4	3	4	4	4	4	4	3	4	4	4	4	37.1	37.1	37.1	11.74	105	105	0	28.272	By MS/MS	By MS/MS	By MS/MS	By MS/MS	By MS/MS	By MS/MS	37.1	28.6	37.1	37.1	37.1	37.1
P47813;X6RAC9;A6NJH9;O14602	P47813;X6RAC9;A6NJH9;O14602	4;3;2;2	4;3;2;2	4;3;2;2	Eukaryotic translation initiation factor 1A, X-chromosomal;Eukaryotic translation initiation factor 1A, Y-chromosomal	EIF1AX;EIF1AY	sp|P47813|IF1AX_HUMAN Eukaryotic translation initiation factor 1A, X-chromosomal OS=Homo sapiens GN=EIF1AX PE=1 SV=2;tr|X6RAC9|X6RAC9_HUMAN Eukaryotic translation initiation factor 1A, X-chromosomal OS=Homo sapiens GN=EIF1AX PE=1 SV=1;tr|A6NJH9|A6NJH9_HUMA	4	4	4	4	3	2	4	3	4	3	3	2	4	3	4	3	3	2	4	3	4	3	22.2	22.2	22.2	16.46	144	144;116;127;144	0	25.996	By MS/MS	By MS/MS	By MS/MS	By MS/MS	By MS/MS	By MS/MS	15.3	14.6	22.2	22.2	22.2	22.2
P49411	P49411	4	4	4	Elongation factor Tu, mitochondrial	TUFM	sp|P49411|EFTU_HUMAN Elongation factor Tu, mitochondrial OS=Homo sapiens GN=TUFM PE=1 SV=2	1	4	4	4	1	1	4	4	4	3	1	1	4	4	4	3	1	1	4	4	4	3	11.9	11.9	11.9	49.541	452	452	0	26.809	By matching	By matching	By MS/MS	By MS/MS	By MS/MS	By MS/MS	4	4	11.9	11.9	11.9	8.8
P53582;H0Y955;H0Y903	P53582;H0Y955;H0Y903	4;3;2	4;3;2	4;3;2	Methionine aminopeptidase 1	METAP1	sp|P53582|MAP11_HUMAN Methionine aminopeptidase 1 OS=Homo sapiens GN=METAP1 PE=1 SV=2;tr|H0Y955|H0Y955_HUMAN Methionine aminopeptidase 1 (Fragment) OS=Homo sapiens GN=METAP1 PE=1 SV=1;tr|H0Y903|H0Y903_HUMAN Methionine aminopeptidase 1 (Fragment) OS=Homo sa	3	4	4	4	2	3	2	4	4	2	2	3	2	4	4	2	2	3	2	4	4	2	14.2	14.2	14.2	43.215	386	386;170;116	0	25.36	By MS/MS	By MS/MS	By MS/MS	By MS/MS	By MS/MS	By MS/MS	6.2	11.4	8.5	14.2	14.2	6.2
P53999	P53999	4	4	4	Activated RNA polymerase II transcriptional coactivator p15	SUB1	sp|P53999|TCP4_HUMAN Activated RNA polymerase II transcriptional coactivator p15 OS=Homo sapiens GN=SUB1 PE=1 SV=3	1	4	4	4	4	4	3	4	4	4	4	4	3	4	4	4	4	4	3	4	4	4	37.8	37.8	37.8	14.395	127	127	0	39.195	By MS/MS	By MS/MS	By MS/MS	By MS/MS	By MS/MS	By MS/MS	37.8	37.8	29.1	37.8	37.8	37.8
P60468	P60468	4	4	4	Protein transport protein Sec61 subunit beta	SEC61B	sp|P60468|SC61B_HUMAN Protein transport protein Sec61 subunit beta OS=Homo sapiens GN=SEC61B PE=1 SV=2	1	4	4	4	4	4	4	4	4	4	4	4	4	4	4	4	4	4	4	4	4	4	36.5	36.5	36.5	9.9743	96	96	0	27.761	By MS/MS	By matching	By MS/MS	By MS/MS	By MS/MS	By MS/MS	36.5	36.5	36.5	36.5	36.5	36.5
P62258;B4DJF2;I3L3T1;K7EIT4;I3L0W5;K7EM20	P62258;B4DJF2;I3L3T1;K7EIT4	6;5;5;3;2;1	4;3;3;2;1;1	4;3;3;2;1;1	14-3-3 protein epsilon	YWHAE	sp|P62258|1433E_HUMAN 14-3-3 protein epsilon OS=Homo sapiens GN=YWHAE PE=1 SV=1;tr|B4DJF2|B4DJF2_HUMAN 14-3-3 protein epsilon OS=Homo sapiens GN=YWHAE PE=1 SV=1;tr|I3L3T1|I3L3T1_HUMAN 14-3-3 protein epsilon OS=Homo sapiens GN=YWHAE PE=1 SV=1;tr|K7EIT4|K7EI	6	6	4	4	6	4	6	6	5	5	4	3	4	4	4	3	4	3	4	4	4	3	18.8	16.1	16.1	29.174	255	255;94;107;109;38;115	0	33.749	By MS/MS	By MS/MS	By MS/MS	By MS/MS	By MS/MS	By MS/MS	18.8	11.8	18.8	18.8	16.1	15.7
P62266;D6RD47;D6RDJ2;D6RIX0;D6R9I7	P62266;D6RD47	4;3;1;1;1	4;3;1;1;1	4;3;1;1;1	40S ribosomal protein S23	RPS23	sp|P62266|RS23_HUMAN 40S ribosomal protein S23 OS=Homo sapiens GN=RPS23 PE=1 SV=3;tr|D6RD47|D6RD47_HUMAN 40S ribosomal protein S23 OS=Homo sapiens GN=RPS23 PE=1 SV=1	5	4	4	4	3	3	3	4	4	4	3	3	3	4	4	4	3	3	3	4	4	4	23.8	23.8	23.8	15.807	143	143;134;55;85;123	0	29.608	By MS/MS	By MS/MS	By MS/MS	By MS/MS	By MS/MS	By MS/MS	23.8	23.8	23.8	23.8	23.8	23.8
P62633	P62633	4	4	4	Cellular nucleic acid-binding protein	CNBP	sp|P62633|CNBP_HUMAN Cellular nucleic acid-binding protein OS=Homo sapiens GN=CNBP PE=1 SV=1	1	4	4	4	4	4	3	4	4	3	4	4	3	4	4	3	4	4	3	4	4	3	31.1	31.1	31.1	19.463	177	177	0	30.504	By MS/MS	By MS/MS	By MS/MS	By MS/MS	By MS/MS	By MS/MS	31.1	31.1	22.6	31.1	31.1	22.6
P63173;J3KT73;J3QL01;J3KSP2	P63173;J3KT73;J3QL01;J3KSP2	4;3;3;2	4;3;3;2	4;3;3;2	60S ribosomal protein L38	RPL38	sp|P63173|RL38_HUMAN 60S ribosomal protein L38 OS=Homo sapiens GN=RPL38 PE=1 SV=2;tr|J3KT73|J3KT73_HUMAN 60S ribosomal protein L38 OS=Homo sapiens GN=RPL38 PE=1 SV=1;tr|J3QL01|J3QL01_HUMAN 60S ribosomal protein L38 OS=Homo sapiens GN=RPL38 PE=1 SV=1;tr|J3K	4	4	4	4	3	4	4	4	4	4	3	4	4	4	4	4	3	4	4	4	4	4	48.6	48.6	48.6	8.2178	70	70;64;67;21	0	25.826	By matching	By MS/MS	By MS/MS	By MS/MS	By MS/MS	By MS/MS	48.6	48.6	48.6	48.6	48.6	48.6
P68371;P04350;K7ESM5;Q3ZCM7;Q9BUF5;M0QY85;A0A075B736;Q5SQY0;A6NNZ2;M0R0X0;M0QY37;M0QX14;M0R042;M0R2D3;M0QZL7;M0QYM7;M0R278;G3V2A3;M0R2T4;CON__ENSEMBL:ENSBTAP00000025008;Q9H4B7;M0R1I1;A0A075B724	P68371;P04350	18;14;5;5;5;4;4;4;4;3;3;3;3;3;3;3;3;3;2;2;2;1;1	18;14;5;5;5;4;4;4;4;3;3;3;3;3;3;3;3;3;2;2;2;1;1	4;3;0;1;0;3;0;0;0;3;3;3;2;2;2;2;2;0;2;0;0;0;1	Tubulin beta-4B chain;Tubulin beta-4A chain	TUBB4B;TUBB4A	sp|P68371|TBB4B_HUMAN Tubulin beta-4B chain OS=Homo sapiens GN=TUBB4B PE=1 SV=1;sp|P04350|TBB4A_HUMAN Tubulin beta-4A chain OS=Homo sapiens GN=TUBB4A PE=1 SV=2	23	18	18	4	14	17	16	16	16	15	14	17	16	16	16	15	3	4	4	4	3	2	44.9	44.9	10.3	49.83	445	445;444;338;444;446;107;407;410;444;103;109;110;144;155;158;161;167;189;104;536;451;74;119	0	157.17	By MS/MS	By MS/MS	By MS/MS	By MS/MS	By MS/MS	By MS/MS	38.7	44.3	44	39.1	44.5	39.1
P78527	P78527	4	4	4	DNA-dependent protein kinase catalytic subunit	PRKDC	sp|P78527|PRKDC_HUMAN DNA-dependent protein kinase catalytic subunit OS=Homo sapiens GN=PRKDC PE=1 SV=3	1	4	4	4	1	2	3	4	3	3	1	2	3	4	3	3	1	2	3	4	3	3	1.1	1.1	1.1	469.08	4128	4128	0	25.557	By matching	By matching	By MS/MS	By MS/MS	By MS/MS	By MS/MS	0.3	0.6	0.8	1.1	0.9	0.8
Q01469;I6L8B7;A8MUU1	Q01469;I6L8B7	4;3;1	4;3;1	4;3;1	Fatty acid-binding protein, epidermal	FABP5	sp|Q01469|FABP5_HUMAN Fatty acid-binding protein, epidermal OS=Homo sapiens GN=FABP5 PE=1 SV=3;tr|I6L8B7|I6L8B7_HUMAN Fatty acid-binding protein, epidermal OS=Homo sapiens GN=FABP5 PE=1 SV=1	3	4	4	4	3	2	3	3	4	3	3	2	3	3	4	3	3	2	3	3	4	3	40.7	40.7	40.7	15.164	135	135;101;101	0	28.62	By MS/MS	By MS/MS	By MS/MS	By MS/MS	By MS/MS	By MS/MS	32.6	25.9	34.1	32.6	40.7	32.6
Q05639	Q05639	12	4	4	Elongation factor 1-alpha 2	EEF1A2	sp|Q05639|EF1A2_HUMAN Elongation factor 1-alpha 2 OS=Homo sapiens GN=EEF1A2 PE=1 SV=1	1	12	4	4	7	8	11	12	12	12	0	2	3	4	4	4	0	2	3	4	4	4	39.3	23.1	23.1	50.47	463	463	0	22.793	By matching	By matching	By MS/MS	By matching	By MS/MS	By MS/MS	13.2	18.6	34.1	39.3	39.3	39.3
Q5SQT6;Q15181	Q5SQT6;Q15181	4;4	4;4	4;4	Inorganic pyrophosphatase	PPA1	tr|Q5SQT6|Q5SQT6_HUMAN Inorganic pyrophosphatase OS=Homo sapiens GN=PPA1 PE=1 SV=1;sp|Q15181|IPYR_HUMAN Inorganic pyrophosphatase OS=Homo sapiens GN=PPA1 PE=1 SV=2	2	4	4	4	3	3	3	4	4	4	3	3	3	4	4	4	3	3	3	4	4	4	30.9	30.9	30.9	19.982	178	178;289	0	26.368	By MS/MS	By MS/MS	By MS/MS	By MS/MS	By MS/MS	By MS/MS	24.7	24.7	24.7	30.9	30.9	30.9
Q15785	Q15785	4	4	4	Mitochondrial import receptor subunit TOM34	TOMM34	sp|Q15785|TOM34_HUMAN Mitochondrial import receptor subunit TOM34 OS=Homo sapiens GN=TOMM34 PE=1 SV=2	1	4	4	4	3	4	4	4	4	3	3	4	4	4	4	3	3	4	4	4	4	3	17.2	17.2	17.2	34.559	309	309	0	34.086	By MS/MS	By MS/MS	By MS/MS	By MS/MS	By MS/MS	By MS/MS	14.2	17.2	17.2	17.2	17.2	14.2
Q16543;K7EQA9;K7EL68;K7EKQ2;K7EIU0	Q16543;K7EQA9;K7EL68;K7EKQ2	4;3;2;2;1	4;3;2;2;1	4;3;2;2;1	Hsp90 co-chaperone Cdc37;Hsp90 co-chaperone Cdc37, N-terminally processed	CDC37	sp|Q16543|CDC37_HUMAN Hsp90 co-chaperone Cdc37 OS=Homo sapiens GN=CDC37 PE=1 SV=1;tr|K7EQA9|K7EQA9_HUMAN Hsp90 co-chaperone Cdc37 (Fragment) OS=Homo sapiens GN=CDC37 PE=1 SV=1;tr|K7EL68|K7EL68_HUMAN Hsp90 co-chaperone Cdc37 (Fragment) OS=Homo sapiens GN=CD	5	4	4	4	4	3	4	3	4	4	4	3	4	3	4	4	4	3	4	3	4	4	11.4	11.4	11.4	44.468	378	378;230;184;353;104	0	28.694	By MS/MS	By MS/MS	By MS/MS	By MS/MS	By MS/MS	By MS/MS	11.4	8.5	11.4	8.5	11.4	11.4
Q2NL82;I3L1Q5	Q2NL82;I3L1Q5	4;2	4;2	4;2	Pre-rRNA-processing protein TSR1 homolog	TSR1	sp|Q2NL82|TSR1_HUMAN Pre-rRNA-processing protein TSR1 homolog OS=Homo sapiens GN=TSR1 PE=1 SV=1;tr|I3L1Q5|I3L1Q5_HUMAN Pre-rRNA-processing protein TSR1 homolog OS=Homo sapiens GN=TSR1 PE=1 SV=2	2	4	4	4	0	1	1	4	4	2	0	1	1	4	4	2	0	1	1	4	4	2	5.8	5.8	5.8	91.809	804	804;368	0	21.892		By matching	By matching	By MS/MS	By MS/MS	By matching	0	1.6	1.6	5.8	5.8	2.7
Q4G0J3;H0YA82;D6RFF0;D6R9Z6	Q4G0J3;H0YA82;D6RFF0	4;3;2;1	4;3;2;1	4;3;2;1	La-related protein 7	LARP7	sp|Q4G0J3|LARP7_HUMAN La-related protein 7 OS=Homo sapiens GN=LARP7 PE=1 SV=1;tr|H0YA82|H0YA82_HUMAN La-related protein 7 (Fragment) OS=Homo sapiens GN=LARP7 PE=1 SV=1;tr|D6RFF0|D6RFF0_HUMAN La-related protein 7 (Fragment) OS=Homo sapiens GN=LARP7 PE=1 SV=	4	4	4	4	3	1	3	4	4	1	3	1	3	4	4	1	3	1	3	4	4	1	9.1	9.1	9.1	66.898	582	582;334;299;155	0	25.308	By matching	By matching	By MS/MS	By MS/MS	By MS/MS	By matching	7.2	2.2	6.5	9.1	9.1	2.2
Q5VTL8	Q5VTL8	4	4	4	Pre-mRNA-splicing factor 38B	PRPF38B	sp|Q5VTL8|PR38B_HUMAN Pre-mRNA-splicing factor 38B OS=Homo sapiens GN=PRPF38B PE=1 SV=1	1	4	4	4	3	2	2	4	3	3	3	2	2	4	3	3	3	2	2	4	3	3	13.2	13.2	13.2	64.467	546	546	0	53.459	By MS/MS	By MS/MS	By MS/MS	By MS/MS	By MS/MS	By MS/MS	11.9	4.4	4.4	13.2	5.7	5.7
Q8TF01	Q8TF01	4	4	4	Arginine/serine-rich protein PNISR	PNISR	sp|Q8TF01|PNISR_HUMAN Arginine/serine-rich protein PNISR OS=Homo sapiens GN=PNISR PE=1 SV=2	1	4	4	4	4	3	2	3	2	3	4	3	2	3	2	3	4	3	2	3	2	3	6.1	6.1	6.1	92.576	805	805	0	26.852	By MS/MS	By MS/MS	By MS/MS	By MS/MS	By MS/MS	By MS/MS	6.1	4.1	2.6	4.6	2.6	4.1
Q92598;A0A0A0MSM0;R4GN69;Q5TBM3	Q92598;A0A0A0MSM0	5;3;2;1	4;2;2;1	4;2;2;1	Heat shock protein 105 kDa	HSPH1	sp|Q92598|HS105_HUMAN Heat shock protein 105 kDa OS=Homo sapiens GN=HSPH1 PE=1 SV=1;tr|A0A0A0MSM0|A0A0A0MSM0_HUMAN Heat shock protein 105 kDa OS=Homo sapiens GN=HSPH1 PE=1 SV=1	4	5	4	4	4	3	4	5	5	5	3	3	4	4	4	4	3	3	4	4	4	4	7.6	5.9	5.9	96.864	858	858;782;115;115	0	23.653	By MS/MS	By MS/MS	By MS/MS	By MS/MS	By MS/MS	By MS/MS	5.9	4.1	5.9	7.6	7.6	7.6
Q99536;K7ERT7;K7EJM4	Q99536;K7ERT7	4;3;1	4;3;1	4;3;1	Synaptic vesicle membrane protein VAT-1 homolog	VAT1	sp|Q99536|VAT1_HUMAN Synaptic vesicle membrane protein VAT-1 homolog OS=Homo sapiens GN=VAT1 PE=1 SV=2;tr|K7ERT7|K7ERT7_HUMAN Synaptic vesicle membrane protein VAT-1 homolog (Fragment) OS=Homo sapiens GN=VAT1 PE=1 SV=1	3	4	4	4	1	1	1	3	4	4	1	1	1	3	4	4	1	1	1	3	4	4	13.2	13.2	13.2	41.92	393	393;146;30	0	25.51	By matching	By matching	By MS/MS	By MS/MS	By MS/MS	By MS/MS	3.1	2.3	4.8	10.9	13.2	13.2
Q9BRA2;I3L0K2;I3L3M7;I3L2R6	Q9BRA2;I3L0K2;I3L3M7;I3L2R6	4;3;3;2	4;3;3;2	4;3;3;2	Thioredoxin domain-containing protein 17	TXNDC17	sp|Q9BRA2|TXD17_HUMAN Thioredoxin domain-containing protein 17 OS=Homo sapiens GN=TXNDC17 PE=1 SV=1;tr|I3L0K2|I3L0K2_HUMAN Thioredoxin domain-containing protein 17 OS=Homo sapiens GN=TXNDC17 PE=1 SV=1;tr|I3L3M7|I3L3M7_HUMAN Thioredoxin domain-containing pr	4	4	4	4	3	3	2	1	1	2	3	3	2	1	1	2	3	3	2	1	1	2	38.2	38.2	38.2	13.941	123	123;75;80;98	0	25.021	By MS/MS	By MS/MS	By MS/MS	By MS/MS	By MS/MS	By MS/MS	26.8	30.9	19.5	8.1	8.1	19.5
Q9H9B4;D6RAE9;D6RDG7;S4R2X2;D6RFI0	Q9H9B4;D6RAE9;D6RDG7;S4R2X2;D6RFI0	4;2;2;2;2	4;2;2;2;2	4;2;2;2;2	Sideroflexin-1	SFXN1	sp|Q9H9B4|SFXN1_HUMAN Sideroflexin-1 OS=Homo sapiens GN=SFXN1 PE=1 SV=4;tr|D6RAE9|D6RAE9_HUMAN Sideroflexin-1 OS=Homo sapiens GN=SFXN1 PE=1 SV=1;tr|D6RDG7|D6RDG7_HUMAN Sideroflexin-1 (Fragment) OS=Homo sapiens GN=SFXN1 PE=1 SV=1;tr|S4R2X2|S4R2X2_HUMAN Side	5	4	4	4	3	2	4	4	4	4	3	2	4	4	4	4	3	2	4	4	4	4	14.3	14.3	14.3	35.619	322	322;56;144;177;194	0	27.944	By matching	By matching	By MS/MS	By MS/MS	By MS/MS	By MS/MS	11.2	7.1	14.3	14.3	14.3	14.3
Q9NXE8;A0A087WY60	Q9NXE8	4;1	4;1	4;1	Pre-mRNA-splicing factor CWC25 homolog	CWC25	sp|Q9NXE8|CWC25_HUMAN Pre-mRNA-splicing factor CWC25 homolog OS=Homo sapiens GN=CWC25 PE=1 SV=1	2	4	4	4	4	4	4	4	4	4	4	4	4	4	4	4	4	4	4	4	4	4	10.8	10.8	10.8	49.647	425	425;68	0	26.409	By MS/MS	By MS/MS	By MS/MS	By MS/MS	By MS/MS	By MS/MS	10.8	10.8	10.8	10.8	10.8	10.8
Q9NYF8;H0YF14	Q9NYF8	75;9	75;9	4;4	Bcl-2-associated transcription factor 1	BCLAF1	sp|Q9NYF8|BCLF1_HUMAN Bcl-2-associated transcription factor 1 OS=Homo sapiens GN=BCLAF1 PE=1 SV=2	2	75	75	4	68	70	72	66	68	66	68	70	72	66	68	66	4	3	4	4	4	4	51.6	51.6	3.5	106.12	920	920;187	0	323.31	By MS/MS	By MS/MS	By MS/MS	By MS/MS	By MS/MS	By MS/MS	50.4	50.7	50.7	50.3	50.5	50.9
Q9UHD1;E9PIZ4;E9PSD5;E9PPQ5;E9PL00;E9PIF7;E9PHZ2	Q9UHD1;E9PIZ4;E9PSD5;E9PPQ5;E9PL00	4;3;3;3;2;1;1	4;3;3;3;2;1;1	4;3;3;3;2;1;1	Cysteine and histidine-rich domain-containing protein 1	CHORDC1	sp|Q9UHD1|CHRD1_HUMAN Cysteine and histidine-rich domain-containing protein 1 OS=Homo sapiens GN=CHORDC1 PE=1 SV=2;tr|E9PIZ4|E9PIZ4_HUMAN Cysteine and histidine-rich domain-containing protein 1 OS=Homo sapiens GN=CHORDC1 PE=1 SV=1;tr|E9PSD5|E9PSD5_HUMAN Cy	7	4	4	4	2	3	4	4	3	3	2	3	4	4	3	3	2	3	4	4	3	3	16.6	16.6	16.6	37.489	332	332;116;120;184;39;117;144	0	27.511	By matching	By MS/MS	By MS/MS	By MS/MS	By matching	By MS/MS	12	14.2	16.6	16.6	14.5	14.2
Q9UN86;D6RE13;D6RBW8;D6RGJ4;D6RAC7;D6RB17	Q9UN86	5;2;2;2;2;2	4;1;1;1;1;1	4;1;1;1;1;1	Ras GTPase-activating protein-binding protein 2	G3BP2	sp|Q9UN86|G3BP2_HUMAN Ras GTPase-activating protein-binding protein 2 OS=Homo sapiens GN=G3BP2 PE=1 SV=2	6	5	4	4	3	4	4	5	4	3	3	3	3	4	3	2	3	3	3	4	3	2	13.5	11	11	54.12	482	482;111;116;125;141;198	0	25.093	By MS/MS	By matching	By MS/MS	By MS/MS	By MS/MS	By MS/MS	8.9	11.4	11.4	13.5	7.7	5.6
Q9Y3U8;J3QSB5;J3KTD3	Q9Y3U8;J3QSB5;J3KTD3	4;3;2	4;3;2	4;3;2	60S ribosomal protein L36	RPL36	sp|Q9Y3U8|RL36_HUMAN 60S ribosomal protein L36 OS=Homo sapiens GN=RPL36 PE=1 SV=3;tr|J3QSB5|J3QSB5_HUMAN 60S ribosomal protein L36 OS=Homo sapiens GN=RPL36 PE=1 SV=1;tr|J3KTD3|J3KTD3_HUMAN 60S ribosomal protein L36 (Fragment) OS=Homo sapiens GN=RPL36 PE=1	3	4	4	4	3	4	4	4	4	4	3	4	4	4	4	4	3	4	4	4	4	4	37.1	37.1	37.1	12.254	105	105;94;68	0	50.163	By MS/MS	By MS/MS	By MS/MS	By MS/MS	By MS/MS	By MS/MS	31.4	37.1	37.1	37.1	37.1	37.1
A0A087WXZ3;Q9Y5A9;S4R3V3;S4R3J8	A0A087WXZ3;Q9Y5A9;S4R3V3	3;3;2;1	3;3;2;1	3;3;2;1	YTH domain-containing family protein 2	YTHDF2	tr|A0A087WXZ3|A0A087WXZ3_HUMAN YTH domain-containing family protein 2 OS=Homo sapiens GN=YTHDF2 PE=1 SV=1;sp|Q9Y5A9|YTHD2_HUMAN YTH domain-containing family protein 2 OS=Homo sapiens GN=YTHDF2 PE=1 SV=2;tr|S4R3V3|S4R3V3_HUMAN YTH domain-containing family p	4	3	3	3	0	1	1	3	2	1	0	1	1	3	2	1	0	1	1	3	2	1	10.4	10.4	10.4	61.163	569	569;579;241;200	0	21.291		By matching	By matching	By MS/MS	By MS/MS	By MS/MS	0	6.3	6.3	10.4	4	2.1
A0A087WYR0;P09132;D6RBG4;A0A087WWU9	A0A087WYR0;P09132	3;3;1;1	3;3;1;1	3;3;1;1	Signal recognition particle 19 kDa protein	SRP19	tr|A0A087WYR0|A0A087WYR0_HUMAN Signal recognition particle 19 kDa protein OS=Homo sapiens GN=SRP19 PE=1 SV=1;sp|P09132|SRP19_HUMAN Signal recognition particle 19 kDa protein OS=Homo sapiens GN=SRP19 PE=1 SV=3	4	3	3	3	0	0	1	3	2	1	0	0	1	3	2	1	0	0	1	3	2	1	32.5	32.5	32.5	13.654	120	120;144;43;104	0	17.963			By matching	By MS/MS	By MS/MS	By matching	0	0	10	32.5	22.5	12.5
A0A087X1A5;Q5JW30;O95793;Q5JW28;F6UDC6	A0A087X1A5;Q5JW30;O95793	5;5;5;2;1	3;3;3;2;1	3;3;3;2;1	Double-stranded RNA-binding protein Staufen homolog 1	STAU1	tr|A0A087X1A5|A0A087X1A5_HUMAN Double-stranded RNA-binding protein Staufen homolog 1 OS=Homo sapiens GN=STAU1 PE=1 SV=1;tr|Q5JW30|Q5JW30_HUMAN Double-stranded RNA-binding protein Staufen homolog 1 OS=Homo sapiens GN=STAU1 PE=1 SV=1;sp|O95793|STAU1_HUMAN Do	5	5	3	3	3	2	4	5	4	4	2	1	3	3	3	3	2	1	3	3	3	3	9.3	6.3	6.3	54.945	493	493;494;577;199;129	0	17.178	By matching	By matching	By matching	By MS/MS	By MS/MS	By matching	5.9	3.9	7.9	9.3	7.9	7.9
A0A087X1B7;X6R700;Q9Y3Y2;Q5T7Y7	A0A087X1B7;X6R700;Q9Y3Y2	3;3;3;1	3;3;3;1	3;3;3;1	Chromatin target of PRMT1 protein	CHTOP	tr|A0A087X1B7|A0A087X1B7_HUMAN Chromatin target of PRMT1 protein OS=Homo sapiens GN=CHTOP PE=1 SV=1;tr|X6R700|X6R700_HUMAN Chromatin target of PRMT1 protein OS=Homo sapiens GN=CHTOP PE=1 SV=1;sp|Q9Y3Y2|CHTOP_HUMAN Chromatin target of PRMT1 protein OS=Homo	4	3	3	3	2	2	2	3	3	2	2	2	2	3	3	2	2	2	2	3	3	2	51.3	51.3	51.3	8.5199	76	76;223;248;101	0	26.76	By MS/MS	By MS/MS	By MS/MS	By MS/MS	By MS/MS	By MS/MS	30.3	30.3	30.3	51.3	51.3	30.3
A0A0A0MSW4;P48739;B3KYB6;B3KYB7;I3L3W1;I3L2X8;I3L471;I3L4C0;I3L4U7;I3L459;I3L4H1;F5GWE5;Q00169	A0A0A0MSW4;P48739;B3KYB6;B3KYB7	3;3;2;2;1;1;1;1;1;1;1;1;1	3;3;2;2;1;1;1;1;1;1;1;1;1	3;3;2;2;1;1;1;1;1;1;1;1;1	Phosphatidylinositol transfer protein beta isoform	PITPNB	tr|A0A0A0MSW4|A0A0A0MSW4_HUMAN Phosphatidylinositol transfer protein beta isoform OS=Homo sapiens GN=PITPNB PE=1 SV=1;sp|P48739|PIPNB_HUMAN Phosphatidylinositol transfer protein beta isoform OS=Homo sapiens GN=PITPNB PE=1 SV=2;tr|B3KYB6|B3KYB6_HUMAN Phosph	13	3	3	3	0	0	0	3	2	2	0	0	0	3	2	2	0	0	0	3	2	2	16.2	16.2	16.2	31.581	271	271;271;120;168;44;83;98;115;121;142;209;270;270	0	18.272				By MS/MS	By MS/MS	By matching	0	0	0	16.2	12.9	12.9
A0A0B4J1R6;P29401	A0A0B4J1R6;P29401	3;3	3;3	3;3	Transketolase	TKT	tr|A0A0B4J1R6|A0A0B4J1R6_HUMAN Transketolase OS=Homo sapiens GN=TKT PE=1 SV=1;sp|P29401|TKT_HUMAN Transketolase OS=Homo sapiens GN=TKT PE=1 SV=3	2	3	3	3	2	1	2	3	3	3	2	1	2	3	3	3	2	1	2	3	3	3	10.7	10.7	10.7	49.91	457	457;623	0	23.374	By matching	By matching	By MS/MS	By MS/MS	By MS/MS	By matching	6.8	4.8	8.8	10.7	10.7	10.7
H3BU16;A6NGP5;Q9H910;H3BMT0;H3BTV5;H3BMV3	H3BU16;A6NGP5;Q9H910;H3BMT0;H3BTV5;H3BMV3	3;3;3;2;2;2	3;3;3;2;2;2	3;3;3;2;2;2	Hematological and neurological expressed 1-like protein	HN1L	tr|H3BU16|H3BU16_HUMAN Hematological and neurological-expressed 1-like protein (Fragment) OS=Homo sapiens GN=HN1L PE=1 SV=1;tr|A6NGP5|A6NGP5_HUMAN Hematological and neurological-expressed 1-like protein OS=Homo sapiens GN=HN1L PE=1 SV=2;sp|Q9H910|HN1L_HUMA	6	3	3	3	2	2	3	3	2	3	2	2	3	3	2	3	2	2	3	3	2	3	23.4	23.4	23.4	17.603	167	167;178;190;115;116;190	0	17.502	By matching	By matching	By matching	By MS/MS	By MS/MS	By MS/MS	15	15	23.4	23.4	15	23.4
B1AK87;B1AK85;B1AK88;P47756	B1AK87;B1AK85;B1AK88;P47756	3;3;3;3	3;3;3;3	3;3;3;3	F-actin-capping protein subunit beta	CAPZB	tr|B1AK87|B1AK87_HUMAN Capping protein (Actin filament) muscle Z-line, beta, isoform CRA_a OS=Homo sapiens GN=CAPZB PE=1 SV=1;tr|B1AK85|B1AK85_HUMAN F-actin-capping protein subunit beta OS=Homo sapiens GN=CAPZB PE=1 SV=1;tr|B1AK88|B1AK88_HUMAN Capping prot	4	3	3	3	1	0	2	3	3	2	1	0	2	3	3	2	1	0	2	3	3	2	15	15	15	29.295	260	260;260;301;277	0	30.341	By matching		By MS/MS	By MS/MS	By MS/MS	By matching	3.5	0	8.8	15	15	8.8
H0Y6Y8;B1AL05;Q8N983;H0YBU8;M0R051	H0Y6Y8;B1AL05;Q8N983;H0YBU8	3;3;3;2;1	3;3;3;2;1	3;3;3;2;1	39S ribosomal protein L43, mitochondrial	MRPL43	tr|H0Y6Y8|H0Y6Y8_HUMAN 39S ribosomal protein L43, mitochondrial (Fragment) OS=Homo sapiens GN=MRPL43 PE=1 SV=1;tr|B1AL05|B1AL05_HUMAN 39S ribosomal protein L43, mitochondrial OS=Homo sapiens GN=MRPL43 PE=1 SV=1;sp|Q8N983|RM43_HUMAN 39S ribosomal protein L4	5	3	3	3	0	0	3	3	3	2	0	0	3	3	3	2	0	0	3	3	3	2	17.2	17.2	17.2	18.657	169	169;184;215;148;44	0	17.445			By matching	By MS/MS	By MS/MS	By matching	0	0	17.2	17.2	17.2	10.7
B4DJV2;O75390;F8VTT8;F8W4S1;A0A0C4DGI3;F8W642;F8W0J2;F8VZK9;F8VP03;F8VX07;F8VRP1;F8VX68;H0YIC4;F8VWQ5;F8VPF9;F8VU34;F8VPA1;F8VR34;F8W1S4;H0YH82;F8W031	B4DJV2;O75390;F8VTT8;F8W4S1;A0A0C4DGI3	3;3;2;2;2;1;1;1;1;1;1;1;1;1;1;1;1;1;1;1;1	3;3;2;2;2;1;1;1;1;1;1;1;1;1;1;1;1;1;1;1;1	3;3;2;2;2;1;1;1;1;1;1;1;1;1;1;1;1;1;1;1;1	Citrate synthase;Citrate synthase, mitochondrial	CS	tr|B4DJV2|B4DJV2_HUMAN Citrate synthase OS=Homo sapiens GN=CS PE=1 SV=1;sp|O75390|CISY_HUMAN Citrate synthase, mitochondrial OS=Homo sapiens GN=CS PE=1 SV=2;tr|F8VTT8|F8VTT8_HUMAN Citrate synthase, mitochondrial (Fragment) OS=Homo sapiens GN=CS PE=1 SV=1;t	21	3	3	3	2	0	1	2	3	1	2	0	1	2	3	1	2	0	1	2	3	1	7.9	7.9	7.9	50.431	453	453;466;149;178;400;66;75;81;105;114;118;120;123;132;141;142;144;146;157;190;263	0	17.418	By matching		By matching	By MS/MS	By MS/MS	By matching	5.5	0	2	5.5	7.9	3.5
C9J4Z3;P61513;M0R0A1;Q6P4E4;E9PEL3;M0R2L6;G5E9R3;A6NKH3	C9J4Z3;P61513;M0R0A1;Q6P4E4;E9PEL3;M0R2L6	3;3;2;2;2;2;1;1	3;3;2;2;2;2;1;1	3;3;2;2;2;2;1;1	60S ribosomal protein L37a	RPL37A	tr|C9J4Z3|C9J4Z3_HUMAN 60S ribosomal protein L37a OS=Homo sapiens GN=RPL37A PE=1 SV=1;sp|P61513|RL37A_HUMAN 60S ribosomal protein L37a OS=Homo sapiens GN=RPL37A PE=1 SV=2;tr|M0R0A1|M0R0A1_HUMAN 60S ribosomal protein L37a OS=Homo sapiens GN=RPL37A PE=1 SV=1	8	3	3	3	1	2	3	3	3	3	1	2	3	3	3	3	1	2	3	3	3	3	55.9	55.9	55.9	7.624	68	68;92;60;72;75;88;58;93	0	23.399	By matching	By matching	By MS/MS	By MS/MS	By MS/MS	By MS/MS	11.8	38.2	55.9	55.9	55.9	55.9
C9J6P4;Q7Z2W4;H7C5K1	C9J6P4;Q7Z2W4	3;3;1	3;3;1	3;3;1	Zinc finger CCCH-type antiviral protein 1	ZC3HAV1	tr|C9J6P4|C9J6P4_HUMAN Zinc finger CCCH-type antiviral protein 1 OS=Homo sapiens GN=ZC3HAV1 PE=1 SV=1;sp|Q7Z2W4|ZCCHV_HUMAN Zinc finger CCCH-type antiviral protein 1 OS=Homo sapiens GN=ZC3HAV1 PE=1 SV=3	3	3	3	3	3	2	3	3	3	3	3	2	3	3	3	3	3	2	3	3	3	3	3.6	3.6	3.6	114.08	1024	1024;902;264	0	18.685	By MS/MS	By matching	By MS/MS	By MS/MS	By MS/MS	By MS/MS	3.6	2.1	3.6	3.6	3.6	3.6
C9JJ19;P82930;A0A087WUZ8	C9JJ19;P82930;A0A087WUZ8	3;3;2	3;3;2	3;3;2	28S ribosomal protein S34, mitochondrial	MRPS34	tr|C9JJ19|C9JJ19_HUMAN 28S ribosomal protein S34, mitochondrial OS=Homo sapiens GN=MRPS34 PE=1 SV=2;sp|P82930|RT34_HUMAN 28S ribosomal protein S34, mitochondrial OS=Homo sapiens GN=MRPS34 PE=1 SV=2;tr|A0A087WUZ8|A0A087WUZ8_HUMAN 28S ribosomal protein S34,	3	3	3	3	3	2	3	3	3	2	3	2	3	3	3	2	3	2	3	3	3	2	13.8	13.8	13.8	26.332	225	225;218;176	0	17.587	By matching	By matching	By matching	By MS/MS	By MS/MS	By matching	13.8	10.2	13.8	13.8	13.8	10.2
C9JXK0;Q14739	C9JXK0;Q14739	3;3	3;3	3;3	Lamin-B receptor	LBR	tr|C9JXK0|C9JXK0_HUMAN Lamin-B receptor (Fragment) OS=Homo sapiens GN=LBR PE=1 SV=1;sp|Q14739|LBR_HUMAN Lamin-B receptor OS=Homo sapiens GN=LBR PE=1 SV=2	2	3	3	3	3	3	3	3	3	2	3	3	3	3	3	2	3	3	3	3	3	2	16.9	16.9	16.9	24.284	213	213;615	0	18.221	By MS/MS	By matching	By matching	By MS/MS	By MS/MS	By MS/MS	16.9	16.9	16.9	16.9	16.9	11.7
CON__P02666	CON__P02666	3	3	3				1	3	3	3	2	3	3	2	2	2	2	3	3	2	2	2	2	3	3	2	2	2	10	10	10	23.583	209	209	0	18.581	By MS/MS	By MS/MS	By MS/MS	By MS/MS	By MS/MS	By MS/MS	6.7	10	10	6.7	6.7	6.7
CON__Q3KNV1;CON__P08729;P08729	CON__Q3KNV1;CON__P08729;P08729	3;3;3	3;3;3	3;3;3	Keratin, type II cytoskeletal 7	KRT7	;;sp|P08729|K2C7_HUMAN Keratin, type II cytoskeletal 7 OS=Homo sapiens GN=KRT7 PE=1 SV=5	3	3	3	3	3	3	2	1	0	2	3	3	2	1	0	2	3	3	2	1	0	2	7.9	7.9	7.9	51.385	469	469;469;469	0	18.088	By MS/MS	By MS/MS	By MS/MS	By matching		By matching	7.9	7.9	5.3	2.8	0	5.3
E5RGG1;H9KVE0;Q9UJW0	E5RGG1;H9KVE0;Q9UJW0	3;3;3	3;3;3	3;3;3	Dynactin subunit 4	DCTN4	tr|E5RGG1|E5RGG1_HUMAN Dynactin subunit 4 (Fragment) OS=Homo sapiens GN=DCTN4 PE=1 SV=1;tr|H9KVE0|H9KVE0_HUMAN Dynactin subunit 4 (Fragment) OS=Homo sapiens GN=DCTN4 PE=1 SV=1;sp|Q9UJW0|DCTN4_HUMAN Dynactin subunit 4 OS=Homo sapiens GN=DCTN4 PE=1 SV=1	3	3	3	3	1	3	2	3	3	2	1	3	2	3	3	2	1	3	2	3	3	2	38.6	38.6	38.6	13.061	114	114;134;460	0	19.849	By matching	By matching	By MS/MS	By MS/MS	By MS/MS	By MS/MS	14.9	38.6	23.7	38.6	38.6	29.8
G3V210;F8VU65;F8VWS0;Q8NHW5;P05388;F8VS58;F8VQY6;F8VPE8;F8VRK7;F8VZS0;F8VWV4;F8VW21	G3V210;F8VU65;F8VWS0;Q8NHW5;P05388;F8VS58;F8VQY6;F8VPE8;F8VRK7;F8VZS0	3;3;3;3;3;2;2;2;2;2;1;1	3;3;3;3;3;2;2;2;2;2;1;1	3;3;3;3;3;2;2;2;2;2;1;1	60S acidic ribosomal protein P0-like;60S acidic ribosomal protein P0	RPLP0;RPLP0P6	tr|G3V210|G3V210_HUMAN 60S acidic ribosomal protein P0 OS=Homo sapiens GN=RPLP0 PE=1 SV=1;tr|F8VU65|F8VU65_HUMAN 60S acidic ribosomal protein P0 (Fragment) OS=Homo sapiens GN=RPLP0 PE=1 SV=1;tr|F8VWS0|F8VWS0_HUMAN 60S acidic ribosomal protein P0 OS=Homo sa	12	3	3	3	3	3	3	3	3	3	3	3	3	3	3	3	3	3	3	3	3	3	20.5	20.5	20.5	18.27	166	166;247;281;317;317;121;142;153;156;246;111;244	0	22.165	By MS/MS	By MS/MS	By MS/MS	By MS/MS	By MS/MS	By MS/MS	20.5	20.5	20.5	20.5	20.5	20.5
F8VZQ9;H0YHG0;P82979	F8VZQ9;H0YHG0;P82979	3;3;3	3;3;3	3;3;3	SAP domain-containing ribonucleoprotein	SARNP	tr|F8VZQ9|F8VZQ9_HUMAN SAP domain-containing ribonucleoprotein OS=Homo sapiens GN=SARNP PE=1 SV=1;tr|H0YHG0|H0YHG0_HUMAN Uncharacterized protein (Fragment) OS=Homo sapiens PE=1 SV=1;sp|P82979|SARNP_HUMAN SAP domain-containing ribonucleoprotein OS=Homo sapi	3	3	3	3	1	2	2	3	3	3	1	2	2	3	3	3	1	2	2	3	3	3	13.6	13.6	13.6	24.105	213	213;523;210	0	16.867	By matching	By matching	By MS/MS	By MS/MS	By matching	By MS/MS	4.7	9.4	9.4	13.6	13.6	13.6
F8WAE5;Q9BY44;H7C5Q3;C9IZE1;F8WF18;F8WAT3	F8WAE5;Q9BY44;H7C5Q3;C9IZE1	3;3;2;2;1;1	3;3;2;2;1;1	3;3;2;2;1;1	Eukaryotic translation initiation factor 2A;Eukaryotic translation initiation factor 2A, N-terminally processed	EIF2A	tr|F8WAE5|F8WAE5_HUMAN Eukaryotic translation initiation factor 2A OS=Homo sapiens GN=EIF2A PE=1 SV=1;sp|Q9BY44|EIF2A_HUMAN Eukaryotic translation initiation factor 2A OS=Homo sapiens GN=EIF2A PE=1 SV=3;tr|H7C5Q3|H7C5Q3_HUMAN Eukaryotic translation initiat	6	3	3	3	1	0	2	3	3	2	1	0	2	3	3	2	1	0	2	3	3	2	9	9	9	64.449	580	580;585;158;237;59;75	0	17.966	By matching		By matching	By MS/MS	By MS/MS	By matching	3.8	0	6.6	9	9	6.6
G3V580;G3V2L6;O14744;G3V5L5;C9JSX3;G3V507;G3V2F5;G3V2X6	G3V580;G3V2L6;O14744;G3V5L5;C9JSX3	3;3;3;2;2;1;1;1	3;3;3;2;2;1;1;1	3;3;3;2;2;1;1;1	Protein arginine N-methyltransferase 5;Protein arginine N-methyltransferase 5, N-terminally processed	PRMT5	tr|G3V580|G3V580_HUMAN Protein arginine N-methyltransferase 5 (Fragment) OS=Homo sapiens GN=PRMT5 PE=1 SV=1;tr|G3V2L6|G3V2L6_HUMAN Protein arginine N-methyltransferase 5 (Fragment) OS=Homo sapiens GN=PRMT5 PE=1 SV=1;sp|O14744|ANM5_HUMAN Protein arginine N-	8	3	3	3	1	1	2	3	2	2	1	1	2	3	2	2	1	1	2	3	2	2	16.1	16.1	16.1	20.375	180	180;183;637;170;186;42;86;185	0	18.509	By matching	By matching	By matching	By MS/MS	By MS/MS	By matching	5	5	9.4	16.1	9.4	9.4
G3V5Q1;G3V3M6;P27695;A0A0C4DGK8;H7C4A8;G3V5M0;G3V359;G3V3C7;G3V5D9	G3V5Q1;G3V3M6;P27695;A0A0C4DGK8;H7C4A8;G3V5M0;G3V359;G3V3C7	3;3;3;2;2;2;2;2;1	3;3;3;2;2;2;2;2;1	3;3;3;2;2;2;2;2;1	DNA-(apurinic or apyrimidinic site) lyase;DNA-(apurinic or apyrimidinic site) lyase, mitochondrial	APEX1	tr|G3V5Q1|G3V5Q1_HUMAN DNA-(apurinic or apyrimidinic site) lyase (Fragment) OS=Homo sapiens GN=APEX1 PE=1 SV=1;tr|G3V3M6|G3V3M6_HUMAN DNA-(apurinic or apyrimidinic site) lyase (Fragment) OS=Homo sapiens GN=APEX1 PE=1 SV=1;sp|P27695|APEX1_HUMAN DNA-(apurini	9	3	3	3	2	1	2	3	3	3	2	1	2	3	3	3	2	1	2	3	3	3	12.4	12.4	12.4	27.125	242	242;263;318;146;150;162;172;174;108	0	21.046	By matching	By matching	By MS/MS	By MS/MS	By MS/MS	By MS/MS	8.3	4.1	8.7	12.4	12.4	12.4
G3XAM7;P35221;E5RJ41;A0A0A0MTJ6;A0A0A0MRI5;P26232	G3XAM7;P35221	3;3;1;1;1;1	3;3;1;1;1;1	3;3;1;1;1;1	Catenin alpha-1	CTNNA1	tr|G3XAM7|G3XAM7_HUMAN Catenin (Cadherin-associated protein), alpha 1, 102kDa, isoform CRA_a OS=Homo sapiens GN=CTNNA1 PE=1 SV=1;sp|P35221|CTNA1_HUMAN Catenin alpha-1 OS=Homo sapiens GN=CTNNA1 PE=1 SV=1	6	3	3	3	3	3	2	3	3	2	3	3	2	3	3	2	3	3	2	3	3	2	5.9	5.9	5.9	92.721	841	841;906;161;476;569;953	0	20.485	By matching	By MS/MS	By matching	By MS/MS	By MS/MS	By matching	5.9	5.9	3.3	5.9	5.9	4.6
G8JLB6;P31943;E7EQJ0;D6RAM1;E5RGV0;D6R9T0;D6RFM3;D6RIT2;D6RIU0;D6RDU3;D6RJ04;D6RIH9;D6RBM0;E9PCY7;D6R9D3;D6RF17;D6RDL0;E5RGH4;H0YAQ2;E7EN40;H0YB39;P55795	G8JLB6;P31943;E7EQJ0;D6RAM1;E5RGV0;D6R9T0;D6RFM3;D6RIT2;D6RIU0;D6RDU3;D6RJ04;D6RIH9;D6RBM0;E9PCY7	3;3;2;2;2;2;2;2;2;2;2;2;2;2;1;1;1;1;1;1;1;1	3;3;2;2;2;2;2;2;2;2;2;2;2;2;1;1;1;1;1;1;1;1	3;3;2;2;2;2;2;2;2;2;2;2;2;2;1;1;1;1;1;1;1;1	Heterogeneous nuclear ribonucleoprotein H;Heterogeneous nuclear ribonucleoprotein H, N-terminally processed	HNRNPH1	tr|G8JLB6|G8JLB6_HUMAN Heterogeneous nuclear ribonucleoprotein H OS=Homo sapiens GN=HNRNPH1 PE=1 SV=1;sp|P31943|HNRH1_HUMAN Heterogeneous nuclear ribonucleoprotein H OS=Homo sapiens GN=HNRNPH1 PE=1 SV=4;tr|E7EQJ0|E7EQJ0_HUMAN Heterogeneous nuclear ribonucl	22	3	3	3	2	2	3	2	2	2	2	2	3	2	2	2	2	2	3	2	2	2	10.4	10.4	10.4	51.229	472	472;449;115;130;155;162;163;164;168;171;172;184;212;429;40;49;84;100;131;166;277;449	0	21.953	By MS/MS	By matching	By MS/MS	By MS/MS	By MS/MS	By MS/MS	7	7	10.4	6.1	6.1	6.1
G8JLG1;Q14683	G8JLG1;Q14683	3;3	3;3	3;3	Structural maintenance of chromosomes protein;Structural maintenance of chromosomes protein 1A	SMC1A	tr|G8JLG1|G8JLG1_HUMAN Structural maintenance of chromosomes protein OS=Homo sapiens GN=SMC1A PE=1 SV=2;sp|Q14683|SMC1A_HUMAN Structural maintenance of chromosomes protein 1A OS=Homo sapiens GN=SMC1A PE=1 SV=2	2	3	3	3	0	2	3	3	3	2	0	2	3	3	3	2	0	2	3	3	3	2	2.9	2.9	2.9	140.86	1211	1211;1233	0	18.11		By matching	By MS/MS	By MS/MS	By MS/MS	By matching	0	1.9	2.9	2.9	2.9	2
H0Y5B4;H7BZ11;J3KQN4;P83881;H7BY91;H0Y3V9;Q969Q0	H0Y5B4;H7BZ11;J3KQN4;P83881;H7BY91;H0Y3V9;Q969Q0	3;3;3;3;2;2;2	3;3;3;3;2;2;2	3;3;3;3;2;2;2	60S ribosomal protein L36a;60S ribosomal protein L36a-like	RPL36A;RPL36A-HNRNPH2;RPL36AL	tr|H0Y5B4|H0Y5B4_HUMAN 60S ribosomal protein L36a OS=Homo sapiens GN=RPL36A PE=3 SV=2;tr|H7BZ11|H7BZ11_HUMAN Protein RPL36A-HNRNPH2 OS=Homo sapiens GN=RPL36A-HNRNPH2 PE=3 SV=2;tr|J3KQN4|J3KQN4_HUMAN 60S ribosomal protein L36a OS=Homo sapiens GN=RPL36A PE=3	7	3	3	3	3	3	3	3	3	2	3	3	3	3	3	2	3	3	3	3	3	2	26.8	26.8	26.8	13.228	112	112;118;142;106;70;77;106	0	24.832	By MS/MS	By MS/MS	By MS/MS	By MS/MS	By MS/MS	By MS/MS	26.8	26.8	26.8	26.8	26.8	19.6
Q86WV2;H3BN72;H3BNV9;P13073;H3BPG0;H3BNI5	Q86WV2;H3BN72;H3BNV9;P13073;H3BPG0	3;3;3;3;2;1	3;3;3;3;2;1	3;3;3;3;2;1	Cytochrome c oxidase subunit 4 isoform 1, mitochondrial	COX4I1	tr|Q86WV2|Q86WV2_HUMAN COX4I1 protein OS=Homo sapiens GN=COX4I1 PE=1 SV=1;tr|H3BN72|H3BN72_HUMAN Cytochrome c oxidase subunit 4 isoform 1, mitochondrial OS=Homo sapiens GN=COX4I1 PE=1 SV=1;tr|H3BNV9|H3BNV9_HUMAN Cytochrome c oxidase subunit 4 isoform 1, mi	6	3	3	3	2	2	3	3	2	1	2	2	3	3	2	1	2	2	3	3	2	1	49.4	49.4	49.4	9.2906	83	83;126;139;169;108;43	0	19.709	By matching	By matching	By MS/MS	By MS/MS	By MS/MS	By matching	27.7	27.7	49.4	49.4	27.7	13.3
H7C5W9;P16615;O14983;Q93084	H7C5W9;P16615	3;3;1;1	3;3;1;1	3;3;1;1	Sarcoplasmic/endoplasmic reticulum calcium ATPase 2	ATP2A2	tr|H7C5W9|H7C5W9_HUMAN Sarcoplasmic/endoplasmic reticulum calcium ATPase 2 (Fragment) OS=Homo sapiens GN=ATP2A2 PE=1 SV=1;sp|P16615|AT2A2_HUMAN Sarcoplasmic/endoplasmic reticulum calcium ATPase 2 OS=Homo sapiens GN=ATP2A2 PE=1 SV=1	4	3	3	3	1	0	1	3	3	2	1	0	1	3	3	2	1	0	1	3	3	2	4	4	4	102.48	933	933;1042;1001;1043	0	18.567	By matching		By matching	By MS/MS	By matching	By matching	1.4	0	1.4	4	4	2.8
I3L1L3;Q9BQG0	I3L1L3;Q9BQG0	3;3	3;3	3;3	Myb-binding protein 1A	MYBBP1A	tr|I3L1L3|I3L1L3_HUMAN Myb-binding protein 1A (Fragment) OS=Homo sapiens GN=MYBBP1A PE=1 SV=1;sp|Q9BQG0|MBB1A_HUMAN Myb-binding protein 1A OS=Homo sapiens GN=MYBBP1A PE=1 SV=2	2	3	3	3	1	0	2	2	3	2	1	0	2	2	3	2	1	0	2	2	3	2	3.3	3.3	3.3	140.13	1252	1252;1328	0	17.519	By matching		By matching	By matching	By MS/MS	By matching	1	0	2.3	2.3	3.3	2.3
I3L3P7;P62244;H3BV27;H3BT37;I3L303;I3L246;H3BVC7;H3BN98	I3L3P7;P62244;H3BV27;H3BT37;I3L303;I3L246	3;3;2;2;2;2;1;1	3;3;2;2;2;2;1;1	3;3;2;2;2;2;1;1	40S ribosomal protein S15a	RPS15A	tr|I3L3P7|I3L3P7_HUMAN 40S ribosomal protein S15a OS=Homo sapiens GN=RPS15A PE=1 SV=1;sp|P62244|RS15A_HUMAN 40S ribosomal protein S15a OS=Homo sapiens GN=RPS15A PE=1 SV=2;tr|H3BV27|H3BV27_HUMAN 40S ribosomal protein S15a OS=Homo sapiens GN=RPS15A PE=1 SV=2	8	3	3	3	3	1	3	3	3	3	3	1	3	3	3	3	3	1	3	3	3	3	20	20	20	11.477	100	100;130;49;50;52;111;58;237	0	20.341	By MS/MS	By matching	By MS/MS	By MS/MS	By MS/MS	By MS/MS	20	11	20	20	20	20
K7ELW0;Q99497;K7EN27	K7ELW0;Q99497	3;3;1	3;3;1	3;3;1	Protein deglycase DJ-1	PARK7	tr|K7ELW0|K7ELW0_HUMAN Protein deglycase DJ-1 OS=Homo sapiens GN=PARK7 PE=1 SV=1;sp|Q99497|PARK7_HUMAN Protein deglycase DJ-1 OS=Homo sapiens GN=PARK7 PE=1 SV=2	3	3	3	3	2	2	2	3	3	3	2	2	2	3	3	3	2	2	2	3	3	3	20.7	20.7	20.7	17.91	169	169;189;160	0	18.837	By matching	By matching	By MS/MS	By MS/MS	By MS/MS	By MS/MS	11.8	20.7	20.7	20.7	20.7	20.7
K7EQA1;O14737;K7ESJ4	K7EQA1;O14737	3;3;1	3;3;1	3;3;1	Programmed cell death protein 5	PDCD5	tr|K7EQA1|K7EQA1_HUMAN Programmed cell death protein 5 OS=Homo sapiens GN=PDCD5 PE=1 SV=1;sp|O14737|PDCD5_HUMAN Programmed cell death protein 5 OS=Homo sapiens GN=PDCD5 PE=1 SV=3	3	3	3	3	3	3	3	3	3	3	3	3	3	3	3	3	3	3	3	3	3	3	40.2	40.2	40.2	10.004	87	87;125;65	0	20.632	By MS/MS	By MS/MS	By MS/MS	By MS/MS	By MS/MS	By MS/MS	40.2	40.2	40.2	40.2	40.2	40.2
O14818;Q8TAA3;F5GY34;H0Y586;A0A087WYS6	O14818;Q8TAA3	3;2;1;1;1	3;2;1;1;1	3;2;1;1;1	Proteasome subunit alpha type-7;Proteasome subunit alpha type-7-like	PSMA7;PSMA8	sp|O14818|PSA7_HUMAN Proteasome subunit alpha type-7 OS=Homo sapiens GN=PSMA7 PE=1 SV=1;sp|Q8TAA3|PSA7L_HUMAN Proteasome subunit alpha type-7-like OS=Homo sapiens GN=PSMA8 PE=2 SV=3	5	3	3	3	0	1	3	3	3	3	0	1	3	3	3	3	0	1	3	3	3	3	18.5	18.5	18.5	27.887	248	248;256;63;187;224	0	17.733		By matching	By matching	By matching	By matching	By MS/MS	0	8.9	18.5	18.5	18.5	18.5
O15067;H0YGH1	O15067	3;1	3;1	3;1	Phosphoribosylformylglycinamidine synthase	PFAS	sp|O15067|PUR4_HUMAN Phosphoribosylformylglycinamidine synthase OS=Homo sapiens GN=PFAS PE=1 SV=4	2	3	3	3	2	1	1	3	3	1	2	1	1	3	3	1	2	1	1	3	3	1	2.4	2.4	2.4	144.73	1338	1338;385	0	17.429	By MS/MS	By matching	By matching	By MS/MS	By MS/MS	By matching	1.6	0.8	0.8	2.4	2.4	0.8
O60884;A0A087WT48	O60884	3;1	3;1	3;1	DnaJ homolog subfamily A member 2	DNAJA2	sp|O60884|DNJA2_HUMAN DnaJ homolog subfamily A member 2 OS=Homo sapiens GN=DNAJA2 PE=1 SV=1	2	3	3	3	3	3	3	3	3	2	3	3	3	3	3	2	3	3	3	3	3	2	8.5	8.5	8.5	45.745	412	412;134	0	19.713	By matching	By matching	By matching	By MS/MS	By MS/MS	By MS/MS	8.5	8.5	8.5	8.5	8.5	6.8
O75534;E9PLT0;E9PKN4;E9PLD4	O75534;E9PLT0	3;2;1;1	3;2;1;1	3;2;1;1	Cold shock domain-containing protein E1	CSDE1	sp|O75534|CSDE1_HUMAN Cold shock domain-containing protein E1 OS=Homo sapiens GN=CSDE1 PE=1 SV=2;tr|E9PLT0|E9PLT0_HUMAN Cold shock domain-containing protein E1 OS=Homo sapiens GN=CSDE1 PE=1 SV=1	4	3	3	3	1	1	1	2	3	3	1	1	1	2	3	3	1	1	1	2	3	3	4.5	4.5	4.5	88.884	798	798;668;46;95	0	19.528	By matching	By matching	By MS/MS	By MS/MS	By MS/MS	By MS/MS	1.5	1.5	1.5	2.9	4.5	4.5
P00441;H7BYH4	P00441;H7BYH4	3;2	3;2	3;2	Superoxide dismutase [Cu-Zn]	SOD1	sp|P00441|SODC_HUMAN Superoxide dismutase [Cu-Zn] OS=Homo sapiens GN=SOD1 PE=1 SV=2;tr|H7BYH4|H7BYH4_HUMAN Superoxide dismutase [Cu-Zn] OS=Homo sapiens GN=SOD1 PE=1 SV=1	2	3	3	3	1	2	1	2	2	2	1	2	1	2	2	2	1	2	1	2	2	2	37	37	37	15.936	154	154;135	0	18.153	By matching	By matching	By matching	By MS/MS	By MS/MS	By MS/MS	6.5	27.9	6.5	27.9	27.9	30.5
Q5JP53;P07437;Q5ST81;Q13885;G3V5W4;G3V2R8;G3V3R4;G3V2N6	Q5JP53;P07437;Q5ST81;Q13885	17;17;14;11;1;1;1;1	4;4;1;1;1;1;1;1	3;3;1;0;0;0;0;0	Tubulin beta chain;Tubulin beta-2A chain	TUBB;TUBB2A	tr|Q5JP53|Q5JP53_HUMAN Tubulin beta chain OS=Homo sapiens GN=TUBB PE=1 SV=1;sp|P07437|TBB5_HUMAN Tubulin beta chain OS=Homo sapiens GN=TUBB PE=1 SV=2;tr|Q5ST81|Q5ST81_HUMAN Tubulin beta chain OS=Homo sapiens GN=TUBB PE=1 SV=1;sp|Q13885|TBB2A_HUMAN Tubulin	8	17	4	3	13	15	15	15	16	15	3	3	4	4	4	3	2	2	3	3	3	3	43.4	10.8	7.3	47.766	426	426;444;372;445;97;118;148;164	0	30.196	By matching	By MS/MS	By MS/MS	By MS/MS	By MS/MS	By MS/MS	36.9	42.7	42.5	37.3	43.4	37.8
P08237	P08237	3	3	3	ATP-dependent 6-phosphofructokinase, muscle type	PFKM	sp|P08237|PFKAM_HUMAN ATP-dependent 6-phosphofructokinase, muscle type OS=Homo sapiens GN=PFKM PE=1 SV=2	1	3	3	3	2	1	2	1	2	2	2	1	2	1	2	2	2	1	2	1	2	2	4.7	4.7	4.7	85.182	780	780	0	18.358	By MS/MS	By matching	By MS/MS	By matching	By MS/MS	By MS/MS	2.8	1.4	2.8	1.9	3.3	3.3
P10599	P10599	3	3	3	Thioredoxin	TXN	sp|P10599|THIO_HUMAN Thioredoxin OS=Homo sapiens GN=TXN PE=1 SV=3	1	3	3	3	3	3	3	3	3	3	3	3	3	3	3	3	3	3	3	3	3	3	25.7	25.7	25.7	11.737	105	105	0	22.357	By MS/MS	By MS/MS	By MS/MS	By MS/MS	By MS/MS	By MS/MS	25.7	25.7	25.7	25.7	25.7	25.7
P14625	P14625	4	3	3	Endoplasmin	HSP90B1	sp|P14625|ENPL_HUMAN Endoplasmin OS=Homo sapiens GN=HSP90B1 PE=1 SV=1	1	4	3	3	2	2	2	4	4	3	1	1	1	3	3	2	1	1	1	3	3	2	6.8	5.4	5.4	92.468	803	803	0	23.404	By matching	By matching	By matching	By MS/MS	By MS/MS	By MS/MS	3.9	3.9	3.9	6.8	6.8	5.6
P16152;E9PQ63;A8MTM1	P16152;E9PQ63;A8MTM1	4;2;2	4;2;2	3;1;1	Carbonyl reductase [NADPH] 1	CBR1	sp|P16152|CBR1_HUMAN Carbonyl reductase [NADPH] 1 OS=Homo sapiens GN=CBR1 PE=1 SV=3;tr|E9PQ63|E9PQ63_HUMAN Carbonyl reductase [NADPH] 1 OS=Homo sapiens GN=CBR1 PE=1 SV=1;tr|A8MTM1|A8MTM1_HUMAN Carbonyl reductase [NADPH] 1 OS=Homo sapiens GN=CBR1 PE=1 SV=1	3	4	4	3	3	2	3	3	3	3	3	2	3	3	3	3	2	1	2	2	2	2	19.1	19.1	13.4	30.375	277	277;178;222	0	30.447	By matching	By matching	By MS/MS	By MS/MS	By MS/MS	By MS/MS	14.8	9.7	14.8	14.8	14.8	14.1
P17812	P17812	3	3	3	CTP synthase 1	CTPS1	sp|P17812|PYRG1_HUMAN CTP synthase 1 OS=Homo sapiens GN=CTPS1 PE=1 SV=2	1	3	3	3	2	2	2	2	2	3	2	2	2	2	2	3	2	2	2	2	2	3	5.4	5.4	5.4	66.69	591	591	0	18.507	By matching	By MS/MS	By matching	By matching	By MS/MS	By MS/MS	3.7	3.7	3.7	3.7	3.7	5.4
Q5JQ13;P18206	Q5JQ13;P18206	3;3	3;3	3;3	Vinculin	VCL	tr|Q5JQ13|Q5JQ13_HUMAN Vinculin (Fragment) OS=Homo sapiens GN=VCL PE=1 SV=1;sp|P18206|VINC_HUMAN Vinculin OS=Homo sapiens GN=VCL PE=1 SV=4	2	3	3	3	2	2	2	3	2	3	2	2	2	3	2	3	2	2	2	3	2	3	4.2	4.2	4.2	87.443	806	806;1134	0	18.087	By matching	By matching	By MS/MS	By MS/MS	By MS/MS	By MS/MS	3	3	3	4.2	3	4.2
Q5QNZ2;P24539	Q5QNZ2;P24539	3;3	3;3	3;3	ATP synthase F(0) complex subunit B1, mitochondrial	ATP5F1	tr|Q5QNZ2|Q5QNZ2_HUMAN ATP synthase F(0) complex subunit B1, mitochondrial OS=Homo sapiens GN=ATP5F1 PE=1 SV=1;sp|P24539|AT5F1_HUMAN ATP synthase F(0) complex subunit B1, mitochondrial OS=Homo sapiens GN=ATP5F1 PE=1 SV=2	2	3	3	3	1	1	3	3	3	1	1	1	3	3	3	1	1	1	3	3	3	1	17.9	17.9	17.9	22.275	195	195;256	0	20.245	By matching	By matching	By matching	By MS/MS	By MS/MS	By MS/MS	7.7	7.7	17.9	17.9	17.9	7.7
P26583;D6R9A6	P26583;D6R9A6	5;4	3;2	3;2	High mobility group protein B2	HMGB2	sp|P26583|HMGB2_HUMAN High mobility group protein B2 OS=Homo sapiens GN=HMGB2 PE=1 SV=2;tr|D6R9A6|D6R9A6_HUMAN High mobility group protein B2 (Fragment) OS=Homo sapiens GN=HMGB2 PE=1 SV=1	2	5	3	3	4	5	5	5	5	5	3	3	3	3	3	3	3	3	3	3	3	3	19.1	12.4	12.4	24.033	209	209;134	0	25.743	By MS/MS	By MS/MS	By MS/MS	By MS/MS	By MS/MS	By MS/MS	18.2	19.1	19.1	19.1	19.1	19.1
P27986;H0YBC2;E5RJY0	P27986;H0YBC2	5;3;2	3;2;1	3;2;1	Phosphatidylinositol 3-kinase regulatory subunit alpha	PIK3R1	sp|P27986|P85A_HUMAN Phosphatidylinositol 3-kinase regulatory subunit alpha OS=Homo sapiens GN=PIK3R1 PE=1 SV=2;tr|H0YBC2|H0YBC2_HUMAN Phosphatidylinositol 3-kinase regulatory subunit alpha (Fragment) OS=Homo sapiens GN=PIK3R1 PE=1 SV=1	3	5	3	3	5	4	5	4	4	4	3	2	3	2	2	2	3	2	3	2	2	2	7.2	4	4	83.597	724	724;189;137	0	18.522	By MS/MS	By MS/MS	By MS/MS	By MS/MS	By MS/MS	By matching	7.2	5.8	7.2	5.8	5.8	5.8
P28074;H0YJM8	P28074	3;1	3;1	3;1	Proteasome subunit beta type-5	PSMB5	sp|P28074|PSB5_HUMAN Proteasome subunit beta type-5 OS=Homo sapiens GN=PSMB5 PE=1 SV=3	2	3	3	3	0	0	2	3	2	2	0	0	2	3	2	2	0	0	2	3	2	2	13.7	13.7	13.7	28.48	263	263;118	0	20.68			By MS/MS	By MS/MS	By MS/MS	By matching	0	0	9.9	13.7	9.9	9.9
P30041	P30041	3	3	3	Peroxiredoxin-6	PRDX6	sp|P30041|PRDX6_HUMAN Peroxiredoxin-6 OS=Homo sapiens GN=PRDX6 PE=1 SV=3	1	3	3	3	1	2	3	3	3	2	1	2	3	3	3	2	1	2	3	3	3	2	22.3	22.3	22.3	25.035	224	224	0	22.658	By MS/MS	By MS/MS	By MS/MS	By MS/MS	By MS/MS	By MS/MS	5.4	12.9	22.3	22.3	22.3	12.9
P30086	P30086	3	3	3	Phosphatidylethanolamine-binding protein 1;Hippocampal cholinergic neurostimulating peptide	PEBP1	sp|P30086|PEBP1_HUMAN Phosphatidylethanolamine-binding protein 1 OS=Homo sapiens GN=PEBP1 PE=1 SV=3	1	3	3	3	3	2	2	3	3	3	3	2	2	3	3	3	3	2	2	3	3	3	16	16	16	21.057	187	187	0	17.987	By MS/MS	By matching	By matching	By MS/MS	By MS/MS	By MS/MS	16	8.6	8.6	16	16	16
P31153	P31153	3	3	3	S-adenosylmethionine synthase isoform type-2	MAT2A	sp|P31153|METK2_HUMAN S-adenosylmethionine synthase isoform type-2 OS=Homo sapiens GN=MAT2A PE=1 SV=1	1	3	3	3	1	1	1	3	2	1	1	1	1	3	2	1	1	1	1	3	2	1	10.4	10.4	10.4	43.66	395	395	0	17.234	By matching	By matching	By MS/MS	By MS/MS	By MS/MS	By MS/MS	3.8	3.8	3.8	10.4	6.6	3.8
P33176;A0A0G2JMZ6;J3KNA1;O60282;Q12840	P33176	3;1;1;1;1	3;1;1;1;1	3;1;1;1;1	Kinesin-1 heavy chain	KIF5B	sp|P33176|KINH_HUMAN Kinesin-1 heavy chain OS=Homo sapiens GN=KIF5B PE=1 SV=1	5	3	3	3	1	1	2	3	2	1	1	1	2	3	2	1	1	1	2	3	2	1	3.5	3.5	3.5	109.68	963	963;860;943;957;1032	0	22.403	By MS/MS	By matching	By MS/MS	By MS/MS	By MS/MS	By MS/MS	1.2	1.2	2.2	3.5	2.2	1.2
P36542	P36542	3	3	3	ATP synthase subunit gamma, mitochondrial	ATP5C1	sp|P36542|ATPG_HUMAN ATP synthase subunit gamma, mitochondrial OS=Homo sapiens GN=ATP5C1 PE=1 SV=1	1	3	3	3	1	0	2	1	3	2	1	0	2	1	3	2	1	0	2	1	3	2	11.4	11.4	11.4	32.996	298	298	0	20.62	By matching		By MS/MS	By MS/MS	By MS/MS	By MS/MS	4	0	8.1	4	11.4	7.4
P37837;F2Z393	P37837;F2Z393	3;2	3;2	3;2	Transaldolase	TALDO1	sp|P37837|TALDO_HUMAN Transaldolase OS=Homo sapiens GN=TALDO1 PE=1 SV=2;tr|F2Z393|F2Z393_HUMAN Transaldolase OS=Homo sapiens GN=TALDO1 PE=1 SV=1	2	3	3	3	1	0	2	3	3	3	1	0	2	3	3	3	1	0	2	3	3	3	10.7	10.7	10.7	37.54	337	337;318	0	20.99	By matching		By matching	By MS/MS	By MS/MS	By MS/MS	3.9	0	7.4	10.7	10.7	10.7
P38117;M0QY67	P38117	3;1	3;1	3;1	Electron transfer flavoprotein subunit beta	ETFB	sp|P38117|ETFB_HUMAN Electron transfer flavoprotein subunit beta OS=Homo sapiens GN=ETFB PE=1 SV=3	2	3	3	3	0	0	3	3	3	3	0	0	3	3	3	3	0	0	3	3	3	3	12.5	12.5	12.5	27.843	255	255;178	0	20.323			By MS/MS	By MS/MS	By MS/MS	By MS/MS	0	0	12.5	12.5	12.5	12.5
P39748;F5H1Y3;I3L3E9	P39748;F5H1Y3	3;2;1	3;2;1	3;2;1	Flap endonuclease 1	FEN1	sp|P39748|FEN1_HUMAN Flap endonuclease 1 OS=Homo sapiens GN=FEN1 PE=1 SV=1;tr|F5H1Y3|F5H1Y3_HUMAN Flap endonuclease 1 (Fragment) OS=Homo sapiens GN=FEN1 PE=1 SV=1	3	3	3	3	1	0	1	3	3	2	1	0	1	3	3	2	1	0	1	3	3	2	10	10	10	42.592	380	380;165;154	0	21.142	By matching		By matching	By MS/MS	By MS/MS	By MS/MS	4.2	0	4.2	10	10	7.1
P42167;G5E972;H0YJH7	P42167;G5E972	9;7;3	9;7;3	3;1;1	Lamina-associated polypeptide 2, isoforms beta/gamma;Thymopoietin;Thymopentin	TMPO	sp|P42167|LAP2B_HUMAN Lamina-associated polypeptide 2, isoforms beta/gamma OS=Homo sapiens GN=TMPO PE=1 SV=2;tr|G5E972|G5E972_HUMAN Lamina-associated polypeptide 2, isoforms beta/gamma OS=Homo sapiens GN=TMPO PE=1 SV=1	3	9	9	3	5	7	7	8	8	8	5	7	7	8	8	8	1	2	2	3	2	2	27.3	27.3	8.8	50.67	454	454;414;237	0	84.657	By MS/MS	By MS/MS	By MS/MS	By MS/MS	By MS/MS	By MS/MS	15.6	23.6	23.6	23.8	27.1	27.1
P49006	P49006	3	3	3	MARCKS-related protein	MARCKSL1	sp|P49006|MRP_HUMAN MARCKS-related protein OS=Homo sapiens GN=MARCKSL1 PE=1 SV=2	1	3	3	3	3	3	3	3	3	3	3	3	3	3	3	3	3	3	3	3	3	3	19.5	19.5	19.5	19.529	195	195	0	21.471	By MS/MS	By matching	By MS/MS	By MS/MS	By MS/MS	By MS/MS	19.5	19.5	19.5	19.5	19.5	19.5
P51572	P51572	3	3	3	B-cell receptor-associated protein 31	BCAP31	sp|P51572|BAP31_HUMAN B-cell receptor-associated protein 31 OS=Homo sapiens GN=BCAP31 PE=1 SV=3	1	3	3	3	3	3	3	3	3	3	3	3	3	3	3	3	3	3	3	3	3	3	8.5	8.5	8.5	27.991	246	246	0	22.057	By MS/MS	By matching	By MS/MS	By MS/MS	By MS/MS	By MS/MS	8.5	8.5	8.5	8.5	8.5	8.5
P60842;J3KT12;E7EQG2;Q14240;J3QL52;J3KT04;J3KS93;J3QQP0;E9PBH4;F8WE11;E7EMV8;J3KSN7;J3QKZ9;J3QLN6;J3KS25;J3QR64;J3KSZ0;J3KTB5;J3QL43;J3QS69	P60842;J3KT12;E7EQG2;Q14240	4;2;2;2;1;1;1;1;1;1;1;1;1;1;1;1;1;1;1;1	4;2;2;2;1;1;1;1;1;1;1;1;1;1;1;1;1;1;1;1	3;1;1;1;1;0;0;0;0;0;0;0;0;0;0;0;1;0;0;0	Eukaryotic initiation factor 4A-I;Eukaryotic initiation factor 4A-II;Eukaryotic initiation factor 4A-II, N-terminally processed	EIF4A1;EIF4A2	sp|P60842|IF4A1_HUMAN Eukaryotic initiation factor 4A-I OS=Homo sapiens GN=EIF4A1 PE=1 SV=1;tr|J3KT12|J3KT12_HUMAN Eukaryotic initiation factor 4A-I OS=Homo sapiens GN=EIF4A1 PE=1 SV=1;tr|E7EQG2|E7EQG2_HUMAN Eukaryotic initiation factor 4A-II OS=Homo sapie	20	4	4	3	3	3	3	4	4	3	3	3	3	4	4	3	3	3	3	3	3	3	13.3	13.3	9.4	46.153	406	406;341;362;407;68;85;85;95;96;97;98;109;135;163;188;214;230;257;271;300	0	32.591	By MS/MS	By MS/MS	By MS/MS	By MS/MS	By MS/MS	By MS/MS	9.4	9.4	9.4	13.3	13.3	9.4
P84077;P61204;F5H423;H0YGG7;C9J1Z8;P84085	P84077;P61204;F5H423	3;3;2;1;1;1	3;3;2;1;1;1	3;3;2;1;1;1	ADP-ribosylation factor 1;ADP-ribosylation factor 3	ARF1;ARF3	sp|P84077|ARF1_HUMAN ADP-ribosylation factor 1 OS=Homo sapiens GN=ARF1 PE=1 SV=2;sp|P61204|ARF3_HUMAN ADP-ribosylation factor 3 OS=Homo sapiens GN=ARF3 PE=1 SV=2;tr|F5H423|F5H423_HUMAN Uncharacterized protein OS=Homo sapiens PE=3 SV=1	6	3	3	3	1	0	1	3	3	1	1	0	1	3	3	1	1	0	1	3	3	1	18.2	18.2	18.2	20.697	181	181;181;210;62;150;180	0	18.857	By matching		By matching	By MS/MS	By MS/MS	By matching	8.3	0	8.3	18.2	18.2	8.3
P61586;Q5JR08;P08134;Q5JR07;C9JNR4;E9PQH6;C9JX21;Q5JR05	P61586;Q5JR08;P08134	3;2;2;1;1;1;1;1	3;2;2;1;1;1;1;1	3;2;2;1;1;1;1;1	Transforming protein RhoA;Rho-related GTP-binding protein RhoC	RHOA;RHOC	sp|P61586|RHOA_HUMAN Transforming protein RhoA OS=Homo sapiens GN=RHOA PE=1 SV=1;tr|Q5JR08|Q5JR08_HUMAN Rho-related GTP-binding protein RhoC (Fragment) OS=Homo sapiens GN=RHOC PE=1 SV=7;sp|P08134|RHOC_HUMAN Rho-related GTP-binding protein RhoC OS=Homo sapi	8	3	3	3	3	3	3	3	3	2	3	3	3	3	3	2	3	3	3	3	3	2	18.1	18.1	18.1	21.768	193	193;189;193;127;129;169;187;199	0	21.769	By MS/MS	By MS/MS	By MS/MS	By MS/MS	By MS/MS	By MS/MS	18.1	18.1	18.1	18.1	18.1	14
P62191	P62191	3	3	3	26S protease regulatory subunit 4	PSMC1	sp|P62191|PRS4_HUMAN 26S protease regulatory subunit 4 OS=Homo sapiens GN=PSMC1 PE=1 SV=1	1	3	3	3	0	2	2	3	3	3	0	2	2	3	3	3	0	2	2	3	3	3	8.4	8.4	8.4	49.184	440	440	0	21.258		By matching	By matching	By MS/MS	By MS/MS	By MS/MS	0	5.7	5.7	8.4	8.4	8.4
P62854;Q5JNZ5	P62854;Q5JNZ5	3;2	3;2	3;2	40S ribosomal protein S26;Putative 40S ribosomal protein S26-like 1	RPS26;RPS26P11	sp|P62854|RS26_HUMAN 40S ribosomal protein S26 OS=Homo sapiens GN=RPS26 PE=1 SV=3;sp|Q5JNZ5|RS26L_HUMAN Putative 40S ribosomal protein S26-like 1 OS=Homo sapiens GN=RPS26P11 PE=5 SV=1	2	3	3	3	3	2	3	3	2	3	3	2	3	3	2	3	3	2	3	3	2	3	31.3	31.3	31.3	13.015	115	115;115	0	37.294	By MS/MS	By MS/MS	By MS/MS	By MS/MS	By MS/MS	By MS/MS	31.3	18.3	31.3	31.3	18.3	31.3
P67936;K7ERG3;K7ENT6;K7EPV9;K7EMU5	P67936;K7ERG3;K7ENT6	8;5;5;2;2	4;1;1;1;1	3;0;0;0;0	Tropomyosin alpha-4 chain	TPM4	sp|P67936|TPM4_HUMAN Tropomyosin alpha-4 chain OS=Homo sapiens GN=TPM4 PE=1 SV=3;tr|K7ERG3|K7ERG3_HUMAN Tropomyosin alpha-4 chain (Fragment) OS=Homo sapiens GN=TPM4 PE=1 SV=1;tr|K7ENT6|K7ENT6_HUMAN Tropomyosin alpha-4 chain (Fragment) OS=Homo sapiens GN=TP	5	8	4	3	7	8	7	8	8	5	3	4	3	4	4	3	3	3	3	3	3	2	25	14.5	10.1	28.521	248	248;170;179;96;102	0	36.614	By MS/MS	By MS/MS	By MS/MS	By MS/MS	By MS/MS	By MS/MS	20.6	25	20.6	25	25	21
P78347	P78347	3	3	3	General transcription factor II-I	GTF2I	sp|P78347|GTF2I_HUMAN General transcription factor II-I OS=Homo sapiens GN=GTF2I PE=1 SV=2	1	3	3	3	1	1	2	2	3	1	1	1	2	2	3	1	1	1	2	2	3	1	3.4	3.4	3.4	112.42	998	998	0	16.662	By matching	By matching	By matching	By MS/MS	By MS/MS	By matching	1.5	1.5	2.3	2.3	3.4	1.5
Q04760	Q04760	3	3	3	Lactoylglutathione lyase	GLO1	sp|Q04760|LGUL_HUMAN Lactoylglutathione lyase OS=Homo sapiens GN=GLO1 PE=1 SV=4	1	3	3	3	3	2	2	3	3	3	3	2	2	3	3	3	3	2	2	3	3	3	20.1	20.1	20.1	20.777	184	184	0	18.995	By MS/MS	By matching	By matching	By MS/MS	By MS/MS	By MS/MS	20.1	10.3	10.3	20.1	20.1	20.1
Q08752	Q08752	3	3	3	Peptidyl-prolyl cis-trans isomerase D	PPID	sp|Q08752|PPID_HUMAN Peptidyl-prolyl cis-trans isomerase D OS=Homo sapiens GN=PPID PE=1 SV=3	1	3	3	3	1	2	2	3	3	2	1	2	2	3	3	2	1	2	2	3	3	2	10.5	10.5	10.5	40.763	370	370	0	21.26	By matching	By matching	By MS/MS	By MS/MS	By MS/MS	By matching	3.2	6.2	6.2	10.5	10.5	6.2
Q14137;A0A075B729	Q14137	3;1	3;1	3;1	Ribosome biogenesis protein BOP1	BOP1	sp|Q14137|BOP1_HUMAN Ribosome biogenesis protein BOP1 OS=Homo sapiens GN=BOP1 PE=1 SV=2	2	3	3	3	3	3	2	2	2	2	3	3	2	2	2	2	3	3	2	2	2	2	5.9	5.9	5.9	83.629	746	746;217	0	18.819	By MS/MS	By MS/MS	By MS/MS	By MS/MS	By MS/MS	By MS/MS	5.9	5.9	4.6	4.6	4.6	4.6
Q14966;A0A096LPH6;C9JWN0	Q14966;A0A096LPH6	3;2;1	3;2;1	3;2;1	Zinc finger protein 638	ZNF638	sp|Q14966|ZN638_HUMAN Zinc finger protein 638 OS=Homo sapiens GN=ZNF638 PE=1 SV=2;tr|A0A096LPH6|A0A096LPH6_HUMAN Zinc finger protein 638 OS=Homo sapiens GN=ZNF638 PE=1 SV=1	3	3	3	3	3	3	3	3	3	2	3	3	3	3	3	2	3	3	3	3	3	2	1.8	1.8	1.8	220.62	1978	1978;918;197	0	19.541	By MS/MS	By MS/MS	By MS/MS	By MS/MS	By MS/MS	By matching	1.8	1.8	1.8	1.8	1.8	1.2
Q15021;E7EN77	Q15021;E7EN77	3;2	3;2	3;2	Condensin complex subunit 1	NCAPD2	sp|Q15021|CND1_HUMAN Condensin complex subunit 1 OS=Homo sapiens GN=NCAPD2 PE=1 SV=3;tr|E7EN77|E7EN77_HUMAN Condensin complex subunit 1 (Fragment) OS=Homo sapiens GN=NCAPD2 PE=1 SV=2	2	3	3	3	3	3	3	3	3	3	3	3	3	3	3	3	3	3	3	3	3	3	2.9	2.9	2.9	157.18	1401	1401;919	0	18.733	By MS/MS	By MS/MS	By MS/MS	By MS/MS	By MS/MS	By MS/MS	2.9	2.9	2.9	2.9	2.9	2.9
Q15084	Q15084	3	3	3	Protein disulfide-isomerase A6	PDIA6	sp|Q15084|PDIA6_HUMAN Protein disulfide-isomerase A6 OS=Homo sapiens GN=PDIA6 PE=1 SV=1	1	3	3	3	1	1	2	3	3	3	1	1	2	3	3	3	1	1	2	3	3	3	12.3	12.3	12.3	48.121	440	440	0	21.912	By matching	By matching	By matching	By MS/MS	By MS/MS	By MS/MS	3.2	3.2	6.6	12.3	12.3	12.3
Q16576;Q5JP01;E9PC52;C9J7L0;H0YEU5;Q5JP02;H0YCT5;H0YF10;H0YDK2;Q09028	Q16576;Q5JP01;E9PC52	3;2;2;1;1;1;1;1;1;1	3;2;2;1;1;1;1;1;1;1	3;2;2;1;1;1;1;1;1;1	Histone-binding protein RBBP7	RBBP7	sp|Q16576|RBBP7_HUMAN Histone-binding protein RBBP7 OS=Homo sapiens GN=RBBP7 PE=1 SV=1;tr|Q5JP01|Q5JP01_HUMAN Histone-binding protein RBBP7 (Fragment) OS=Homo sapiens GN=RBBP7 PE=1 SV=1;tr|E9PC52|E9PC52_HUMAN Histone-binding protein RBBP7 OS=Homo sapiens G	10	3	3	3	3	3	3	3	3	3	3	3	3	3	3	3	3	3	3	3	3	3	9.2	9.2	9.2	47.82	425	425;285;416;68;167;175;180;207;262;425	0	17.618	By MS/MS	By matching	By MS/MS	By MS/MS	By MS/MS	By MS/MS	9.2	9.2	9.2	9.2	9.2	9.2
Q68E01	Q68E01	3	3	3	Integrator complex subunit 3	INTS3	sp|Q68E01|INT3_HUMAN Integrator complex subunit 3 OS=Homo sapiens GN=INTS3 PE=1 SV=1	1	3	3	3	3	3	3	3	3	2	3	3	3	3	3	2	3	3	3	3	3	2	3.8	3.8	3.8	118.07	1043	1043	0	20.452	By MS/MS	By matching	By MS/MS	By MS/MS	By MS/MS	By MS/MS	3.8	3.8	3.8	3.8	3.8	3.6
Q86UD0	Q86UD0	3	3	3	Suppressor APC domain-containing protein 2	SAPCD2	sp|Q86UD0|SAPC2_HUMAN Suppressor APC domain-containing protein 2 OS=Homo sapiens GN=SAPCD2 PE=1 SV=2	1	3	3	3	2	2	2	2	3	1	2	2	2	2	3	1	2	2	2	2	3	1	6.9	6.9	6.9	42.636	394	394	0	16.788	By MS/MS	By matching	By matching	By MS/MS	By MS/MS	By MS/MS	4.8	4.8	4.8	4.8	6.9	2.5
Q8IVM0	Q8IVM0	3	3	3	Coiled-coil domain-containing protein 50	CCDC50	sp|Q8IVM0|CCD50_HUMAN Coiled-coil domain-containing protein 50 OS=Homo sapiens GN=CCDC50 PE=1 SV=1	1	3	3	3	3	3	3	3	3	2	3	3	3	3	3	2	3	3	3	3	3	2	13.1	13.1	13.1	35.822	306	306	0	20.892	By MS/MS	By MS/MS	By MS/MS	By MS/MS	By MS/MS	By MS/MS	13.1	13.1	13.1	13.1	13.1	9.2
Q92522	Q92522	3	3	3	Histone H1x	H1FX	sp|Q92522|H1X_HUMAN Histone H1x OS=Homo sapiens GN=H1FX PE=1 SV=1	1	3	3	3	3	2	2	3	3	3	3	2	2	3	3	3	3	2	2	3	3	3	18.3	18.3	18.3	22.487	213	213	0	20.001	By MS/MS	By MS/MS	By MS/MS	By MS/MS	By MS/MS	By MS/MS	18.3	10.8	10.8	18.3	18.3	18.3
Q92900	Q92900	3	3	3	Regulator of nonsense transcripts 1	UPF1	sp|Q92900|RENT1_HUMAN Regulator of nonsense transcripts 1 OS=Homo sapiens GN=UPF1 PE=1 SV=2	1	3	3	3	3	3	3	3	3	3	3	3	3	3	3	3	3	3	3	3	3	3	3	3	3	124.34	1129	1129	0	17.415	By matching	By matching	By MS/MS	By MS/MS	By MS/MS	By MS/MS	3	3	3	3	3	3
Q96LB3;E5RGX6;E5RJK3;E5RIF0;E5RH29	Q96LB3	3;1;1;1;1	3;1;1;1;1	3;1;1;1;1	Intraflagellar transport protein 74 homolog	IFT74	sp|Q96LB3|IFT74_HUMAN Intraflagellar transport protein 74 homolog OS=Homo sapiens GN=IFT74 PE=1 SV=1	5	3	3	3	2	2	2	1	2	2	2	2	2	1	2	2	2	2	2	1	2	2	6.8	6.8	6.8	69.239	600	600;127;146;147;175	0	16.882	By MS/MS	By MS/MS	By matching	By MS/MS	By MS/MS	By MS/MS	4.5	4.5	4.5	2.5	4.8	4.5
Q96PK6	Q96PK6	3	3	3	RNA-binding protein 14	RBM14	sp|Q96PK6|RBM14_HUMAN RNA-binding protein 14 OS=Homo sapiens GN=RBM14 PE=1 SV=2	1	3	3	3	0	0	2	3	2	2	0	0	2	3	2	2	0	0	2	3	2	2	7.2	7.2	7.2	69.491	669	669	0	19.197			By matching	By MS/MS	By MS/MS	By matching	0	0	5.4	7.2	5.4	5.4
Q96T58;F6WRY4	Q96T58	3;1	3;1	3;1	Msx2-interacting protein	SPEN	sp|Q96T58|MINT_HUMAN Msx2-interacting protein OS=Homo sapiens GN=SPEN PE=1 SV=1	2	3	3	3	3	3	3	3	3	3	3	3	3	3	3	3	3	3	3	3	3	3	1	1	1	402.24	3664	3664;373	0	20.547	By MS/MS	By MS/MS	By MS/MS	By MS/MS	By MS/MS	By MS/MS	1	1	1	1	1	1
Q99575;E5RK39	Q99575;E5RK39	3;2	3;2	3;2	Ribonucleases P/MRP protein subunit POP1	POP1	sp|Q99575|POP1_HUMAN Ribonucleases P/MRP protein subunit POP1 OS=Homo sapiens GN=POP1 PE=1 SV=2;tr|E5RK39|E5RK39_HUMAN Ribonucleases P/MRP protein subunit POP1 (Fragment) OS=Homo sapiens GN=POP1 PE=1 SV=1	2	3	3	3	1	1	3	3	3	2	1	1	3	3	3	2	1	1	3	3	3	2	3.9	3.9	3.9	114.71	1024	1024;183	0	17.503	By matching	By matching	By matching	By MS/MS	By MS/MS	By MS/MS	1.7	1.7	3.9	3.9	3.9	2.7
Q99714;Q5H928	Q99714;Q5H928	3;2	3;2	3;2	3-hydroxyacyl-CoA dehydrogenase type-2	HSD17B10	sp|Q99714|HCD2_HUMAN 3-hydroxyacyl-CoA dehydrogenase type-2 OS=Homo sapiens GN=HSD17B10 PE=1 SV=3;tr|Q5H928|Q5H928_HUMAN 3-hydroxyacyl-CoA dehydrogenase type-2 OS=Homo sapiens GN=HSD17B10 PE=1 SV=1	2	3	3	3	1	1	3	3	3	3	1	1	3	3	3	3	1	1	3	3	3	3	21.1	21.1	21.1	26.923	261	261;169	0	20.375	By matching	By matching	By matching	By MS/MS	By MS/MS	By MS/MS	7.7	7.7	21.1	21.1	21.1	21.1
Q9BRL6	Q9BRL6	6	3	3	Serine/arginine-rich splicing factor 8	SRSF8	sp|Q9BRL6|SRSF8_HUMAN Serine/arginine-rich splicing factor 8 OS=Homo sapiens GN=SRSF8 PE=1 SV=1	1	6	3	3	5	5	5	6	5	6	2	2	2	3	2	3	2	2	2	3	2	3	20.2	16.7	16.7	32.287	282	282	0	20.443	By matching	By matching	By MS/MS	By MS/MS	By MS/MS	By MS/MS	14.5	14.5	14.5	20.2	17.4	20.2
Q9H2G2	Q9H2G2	3	3	3	STE20-like serine/threonine-protein kinase	SLK	sp|Q9H2G2|SLK_HUMAN STE20-like serine/threonine-protein kinase OS=Homo sapiens GN=SLK PE=1 SV=1	1	3	3	3	2	2	3	2	2	2	2	2	3	2	2	2	2	2	3	2	2	2	2.6	2.6	2.6	142.69	1235	1235	0	18.289	By MS/MS	By matching	By MS/MS	By MS/MS	By MS/MS	By MS/MS	1.8	1.7	2.6	1.7	1.7	1.7
Q9H7N4	Q9H7N4	3	3	3	Splicing factor, arginine/serine-rich 19	SCAF1	sp|Q9H7N4|SFR19_HUMAN Splicing factor, arginine/serine-rich 19 OS=Homo sapiens GN=SCAF1 PE=1 SV=3	1	3	3	3	2	1	2	3	3	1	2	1	2	3	3	1	2	1	2	3	3	1	2.6	2.6	2.6	139.27	1312	1312	0	21.719	By MS/MS	By matching	By matching	By MS/MS	By MS/MS	By matching	1.9	1	1.9	2.6	2.6	0.7
Q9NR12;D6RAN1;D6RF83;H7BYK4;D6RH06	Q9NR12	3;1;1;1;1	3;1;1;1;1	3;1;1;1;1	PDZ and LIM domain protein 7	PDLIM7	sp|Q9NR12|PDLI7_HUMAN PDZ and LIM domain protein 7 OS=Homo sapiens GN=PDLIM7 PE=1 SV=1	5	3	3	3	3	3	2	3	3	1	3	3	2	3	3	1	3	3	2	3	3	1	8.3	8.3	8.3	49.844	457	457;90;173;195;287	0	17.88	By matching	By matching	By matching	By MS/MS	By MS/MS	By matching	8.3	8.3	5.5	8.3	8.3	2.6
Q9NR30	Q9NR30	4	3	3	Nucleolar RNA helicase 2	DDX21	sp|Q9NR30|DDX21_HUMAN Nucleolar RNA helicase 2 OS=Homo sapiens GN=DDX21 PE=1 SV=5	1	4	3	3	2	2	3	4	3	2	1	1	2	3	2	2	1	1	2	3	2	2	6.3	4.3	4.3	87.343	783	783	0	17.704	By matching	By matching	By matching	By MS/MS	By MS/MS	By MS/MS	3.3	3.3	5	6.3	5	3.1
Q9UGI8;F8W7T0;H7BYK1	Q9UGI8	3;1;1	3;1;1	3;1;1	Testin	TES	sp|Q9UGI8|TES_HUMAN Testin OS=Homo sapiens GN=TES PE=1 SV=1	3	3	3	3	0	1	1	2	3	1	0	1	1	2	3	1	0	1	1	2	3	1	7.8	7.8	7.8	47.996	421	421;79;192	0	17.646		By matching	By matching	By MS/MS	By MS/MS	By matching	0	2.1	2.1	5	7.8	2.1
Q9UHB9	Q9UHB9	3	3	3	Signal recognition particle subunit SRP68	SRP68	sp|Q9UHB9|SRP68_HUMAN Signal recognition particle subunit SRP68 OS=Homo sapiens GN=SRP68 PE=1 SV=2	1	3	3	3	1	1	1	3	3	3	1	1	1	3	3	3	1	1	1	3	3	3	5.1	5.1	5.1	70.729	627	627	0	18.969	By matching	By matching	By matching	By MS/MS	By MS/MS	By MS/MS	2.1	2.1	2.1	5.1	5.1	5.1
Q9Y5L4;K7EIT2	Q9Y5L4	3;1	3;1	3;1	Mitochondrial import inner membrane translocase subunit Tim13	TIMM13	sp|Q9Y5L4|TIM13_HUMAN Mitochondrial import inner membrane translocase subunit Tim13 OS=Homo sapiens GN=TIMM13 PE=1 SV=1	2	3	3	3	2	2	2	3	3	3	2	2	2	3	3	3	2	2	2	3	3	3	36.8	36.8	36.8	10.5	95	95;80	0	19.314	By matching	By matching	By MS/MS	By MS/MS	By MS/MS	By MS/MS	25.3	25.3	25.3	36.8	36.8	36.8
E5RIU6;A0A087WZZ9;A0A024QZP7;P06493;G3V317;K7ELV5;E7ESI2;G3V5T9;P24941;Q00526	E5RIU6;A0A087WZZ9;A0A024QZP7;P06493;G3V317;K7ELV5;E7ESI2;G3V5T9;P24941;Q00526	2;2;2;2;1;1;1;1;1;1	2;2;2;2;1;1;1;1;1;1	2;2;2;2;1;1;1;1;1;1	Cyclin-dependent kinase 1;Cyclin-dependent kinase 2;Cyclin-dependent kinase 3	CDK1;CDC2;CDK2;CDK3	tr|E5RIU6|E5RIU6_HUMAN Cyclin-dependent kinase 1 (Fragment) OS=Homo sapiens GN=CDK1 PE=1 SV=2;tr|A0A087WZZ9|A0A087WZZ9_HUMAN Cyclin-dependent kinase 1 OS=Homo sapiens GN=CDK1 PE=1 SV=1;tr|A0A024QZP7|A0A024QZP7_HUMAN Cell division cycle 2, G1 to S and G2 to	10	2	2	2	1	1	0	1	2	1	1	1	0	1	2	1	1	1	0	1	2	1	13.2	13.2	13.2	21.738	189	189;224;297;297;39;165;238;346;298;305	0	13.276	By matching	By matching		By MS/MS	By MS/MS	By MS/MS	5.8	5.8	0	5.8	13.2	5.8
A0A087WTB8;P15374;Q5TBK7	A0A087WTB8;P15374;Q5TBK7	2;2;1	2;2;1	2;2;1	Ubiquitin carboxyl-terminal hydrolase;Ubiquitin carboxyl-terminal hydrolase isozyme L3	UCHL3	tr|A0A087WTB8|A0A087WTB8_HUMAN Ubiquitin carboxyl-terminal hydrolase OS=Homo sapiens GN=UCHL3 PE=1 SV=1;sp|P15374|UCHL3_HUMAN Ubiquitin carboxyl-terminal hydrolase isozyme L3 OS=Homo sapiens GN=UCHL3 PE=1 SV=1;tr|Q5TBK7|Q5TBK7_HUMAN Ubiquitin carboxyl-term	3	2	2	2	2	2	2	2	2	2	2	2	2	2	2	2	2	2	2	2	2	2	17	17	17	21.945	194	194;230;228	0	12.272	By matching	By matching	By matching	By MS/MS	By MS/MS	By MS/MS	17	17	17	17	17	17
R4GMX5;I3L192;A0A087WUV8;A0A087X2B5;P35613;R4GN83	R4GMX5;I3L192;A0A087WUV8;A0A087X2B5;P35613;R4GN83	2;2;2;2;2;1	2;2;2;2;2;1	2;2;2;2;2;1	Basigin	BSG	tr|R4GMX5|R4GMX5_HUMAN Basigin (Fragment) OS=Homo sapiens GN=BSG PE=1 SV=1;tr|I3L192|I3L192_HUMAN Basigin (Fragment) OS=Homo sapiens GN=BSG PE=1 SV=7;tr|A0A087WUV8|A0A087WUV8_HUMAN Basigin OS=Homo sapiens GN=BSG PE=1 SV=1;tr|A0A087X2B5|A0A087X2B5_HUMAN Bas	6	2	2	2	2	2	2	2	2	2	2	2	2	2	2	2	2	2	2	2	2	2	29.8	29.8	29.8	9.3354	84	84;161;189;221;385;52	0	14.697	By MS/MS	By matching	By MS/MS	By MS/MS	By MS/MS	By MS/MS	29.8	29.8	29.8	29.8	29.8	29.8
F8W7C6;A0A087WV22;H7C123;H7C2C5;Q96L21	F8W7C6;A0A087WV22	11;11;5;5;4	11;11;5;5;4	2;2;0;0;0		RPL10	tr|F8W7C6|F8W7C6_HUMAN 60S ribosomal protein L10 OS=Homo sapiens GN=RPL10 PE=1 SV=2;tr|A0A087WV22|A0A087WV22_HUMAN 60S ribosomal protein L10 OS=Homo sapiens GN=RPL10 PE=1 SV=1	5	11	11	2	9	9	10	10	10	11	9	9	10	10	10	11	2	2	2	2	2	2	52.1	52.1	7.4	18.565	163	163;178;91;131;214	0	77.959	By MS/MS	By MS/MS	By MS/MS	By MS/MS	By MS/MS	By MS/MS	43.6	43.6	51.5	51.5	51.5	52.1
A0A087WWJ2;C9J5D1;E7EQ69;Q9GZZ1;F8WCK0;C9JZU6;C9J5J3;A0A0D9SF32;B0AZT5	A0A087WWJ2;C9J5D1;E7EQ69;Q9GZZ1;F8WCK0;C9JZU6;C9J5J3;A0A0D9SF32;B0AZT5	2;2;2;2;1;1;1;1;1	2;2;2;2;1;1;1;1;1	2;2;2;2;1;1;1;1;1	N-alpha-acetyltransferase 50	NAA50	tr|A0A087WWJ2|A0A087WWJ2_HUMAN N-alpha-acetyltransferase 50 OS=Homo sapiens GN=NAA50 PE=1 SV=1;tr|C9J5D1|C9J5D1_HUMAN N-alpha-acetyltransferase 50 OS=Homo sapiens GN=NAA50 PE=1 SV=1;tr|E7EQ69|E7EQ69_HUMAN N-alpha-acetyltransferase 50 OS=Homo sapiens GN=NAA	9	2	2	2	1	1	1	2	2	2	1	1	1	2	2	2	1	1	1	2	2	2	28.4	28.4	28.4	9.4367	81	81;129;168;169;48;57;58;58;95	0	11.56	By matching	By matching	By matching	By MS/MS	By MS/MS	By matching	13.6	13.6	13.6	28.4	28.4	28.4
A0A087WXZ8;Q8N9Q2	A0A087WXZ8;Q8N9Q2	2;2	2;2	2;2	Protein SREK1IP1	SREK1IP1	tr|A0A087WXZ8|A0A087WXZ8_HUMAN Protein SREK1IP1 OS=Homo sapiens GN=SREK1IP1 PE=1 SV=1;sp|Q8N9Q2|SR1IP_HUMAN Protein SREK1IP1 OS=Homo sapiens GN=SREK1IP1 PE=1 SV=1	2	2	2	2	2	1	2	2	1	2	2	1	2	2	1	2	2	1	2	2	1	2	23.5	23.5	23.5	11.405	98	98;155	0	13.183	By MS/MS	By matching	By matching	By MS/MS	By matching	By MS/MS	23.5	12.2	23.5	23.5	12.2	23.5
A0A087WY03;E5RFV3	A0A087WY03;E5RFV3	2;2	2;2	2;2		SREK1	tr|A0A087WY03|A0A087WY03_HUMAN Splicing regulatory glutamine/lysine-rich protein 1 OS=Homo sapiens GN=SREK1 PE=1 SV=1;tr|E5RFV3|E5RFV3_HUMAN Splicing regulatory glutamine/lysine-rich protein 1 OS=Homo sapiens GN=SREK1 PE=1 SV=1	2	2	2	2	2	2	2	2	2	2	2	2	2	2	2	2	2	2	2	2	2	2	35	35	35	10.713	100	100;132	0	54.308	By MS/MS	By matching	By matching	By MS/MS	By MS/MS	By MS/MS	35	35	35	35	35	35
A0A087WYR3;O43399	A0A087WYR3;O43399	2;2	2;2	2;2	Tumor protein D54	TPD52L2	tr|A0A087WYR3|A0A087WYR3_HUMAN Tumor protein D54 OS=Homo sapiens GN=TPD52L2 PE=1 SV=1;sp|O43399|TPD54_HUMAN Tumor protein D54 OS=Homo sapiens GN=TPD52L2 PE=1 SV=2	2	2	2	2	0	1	2	2	2	2	0	1	2	2	2	2	0	1	2	2	2	2	11.3	11.3	11.3	23.764	222	222;206	0	12.076		By matching	By matching	By MS/MS	By MS/MS	By matching	0	6.3	11.3	11.3	11.3	11.3
F8WE72;A0A087X020;Q9Y3A5	F8WE72;A0A087X020;Q9Y3A5	2;2;2	2;2;2	2;2;2	Ribosome maturation protein SBDS	SBDS	tr|F8WE72|F8WE72_HUMAN Ribosome maturation protein SBDS OS=Homo sapiens GN=SBDS PE=1 SV=1;tr|A0A087X020|A0A087X020_HUMAN Ribosome maturation protein SBDS OS=Homo sapiens GN=SBDS PE=1 SV=1;sp|Q9Y3A5|SBDS_HUMAN Ribosome maturation protein SBDS OS=Homo sapien	3	2	2	2	2	2	2	2	2	2	2	2	2	2	2	2	2	2	2	2	2	2	20.9	20.9	20.9	9.7691	86	86;250;250	0	13.794	By MS/MS	By matching	By MS/MS	By MS/MS	By MS/MS	By MS/MS	20.9	20.9	20.9	20.9	20.9	20.9
F1T0B3;A0A087X2G1;Q92499	F1T0B3;A0A087X2G1;Q92499	2;2;2	2;2;2	2;2;2	ATP-dependent RNA helicase DDX1	DDX1	tr|F1T0B3|F1T0B3_HUMAN ATP-dependent RNA helicase DDX1 OS=Homo sapiens GN=DDX1 PE=1 SV=1;tr|A0A087X2G1|A0A087X2G1_HUMAN ATP-dependent RNA helicase DDX1 OS=Homo sapiens GN=DDX1 PE=1 SV=1;sp|Q92499|DDX1_HUMAN ATP-dependent RNA helicase DDX1 OS=Homo sapiens G	3	2	2	2	1	2	1	2	2	2	1	2	1	2	2	2	1	2	1	2	2	2	3.6	3.6	3.6	73.915	659	659;659;740	0	11.908	By matching	By matching	By matching	By MS/MS	By MS/MS	By MS/MS	2.4	3.6	2.4	3.6	3.6	3.6
A0A0A0MR02;P45880	A0A0A0MR02;P45880	2;2	2;2	2;2	Voltage-dependent anion-selective channel protein 2	VDAC2	tr|A0A0A0MR02|A0A0A0MR02_HUMAN Voltage-dependent anion-selective channel protein 2 (Fragment) OS=Homo sapiens GN=VDAC2 PE=1 SV=1;sp|P45880|VDAC2_HUMAN Voltage-dependent anion-selective channel protein 2 OS=Homo sapiens GN=VDAC2 PE=1 SV=2	2	2	2	2	0	0	2	2	2	2	0	0	2	2	2	2	0	0	2	2	2	2	11.3	11.3	11.3	30.348	282	282;294	0	16.329			By matching	By MS/MS	By matching	By MS/MS	0	0	11.3	11.3	11.3	11.3
A0A0A0MRH2;P21817	A0A0A0MRH2;P21817	2;2	2;2	2;2	Ryanodine receptor 1	RYR1	tr|A0A0A0MRH2|A0A0A0MRH2_HUMAN Ryanodine receptor 1 OS=Homo sapiens GN=RYR1 PE=1 SV=1;sp|P21817|RYR1_HUMAN Ryanodine receptor 1 OS=Homo sapiens GN=RYR1 PE=1 SV=3	2	2	2	2	1	1	2	1	1	1	1	1	2	1	1	1	1	1	2	1	1	1	0.6	0.6	0.6	564.58	5032	5032;5038	0	11.524	By matching	By MS/MS	By MS/MS	By matching	By matching	By matching	0.2	0.2	0.6	0.2	0.2	0.2
A0A0A0MRI2;Q9UNH7;G3V2U1;H0YJF8;G3V4Z5;G3V5X9	A0A0A0MRI2;Q9UNH7	3;3;1;1;1;1	2;2;0;0;0;0	2;2;0;0;0;0	Sorting nexin-6;Sorting nexin-6, N-terminally processed	SNX6	tr|A0A0A0MRI2|A0A0A0MRI2_HUMAN Sorting nexin 6, isoform CRA_b OS=Homo sapiens GN=SNX6 PE=1 SV=1;sp|Q9UNH7|SNX6_HUMAN Sorting nexin-6 OS=Homo sapiens GN=SNX6 PE=1 SV=1	6	3	2	2	1	2	2	3	3	3	1	2	1	2	2	2	1	2	1	2	2	2	7.4	5	5	47.804	418	418;406;132;150;169;239	0	12.009	By MS/MS	By MS/MS	By MS/MS	By MS/MS	By MS/MS	By MS/MS	2.4	5	4.8	7.4	7.4	7.4
A0A0A0MRJ6;H7BY58;P22061;C9J0F2;F6S8N6	A0A0A0MRJ6;H7BY58;P22061;C9J0F2;F6S8N6	2;2;2;1;1	2;2;2;1;1	2;2;2;1;1	Protein-L-isoaspartate O-methyltransferase;Protein-L-isoaspartate(D-aspartate) O-methyltransferase	PCMT1	tr|A0A0A0MRJ6|A0A0A0MRJ6_HUMAN Protein-L-isoaspartate O-methyltransferase OS=Homo sapiens GN=PCMT1 PE=1 SV=1;tr|H7BY58|H7BY58_HUMAN Protein-L-isoaspartate O-methyltransferase OS=Homo sapiens GN=PCMT1 PE=1 SV=1;sp|P22061|PIMT_HUMAN Protein-L-isoaspartate(D-	5	2	2	2	2	2	1	2	2	2	2	2	1	2	2	2	2	2	1	2	2	2	9.1	9.1	9.1	30.315	285	285;286;227;96;250	0	12.003	By matching	By matching	By matching	By MS/MS	By MS/MS	By MS/MS	9.1	9.1	6	9.1	9.1	9.1
U3KQI3;Q5TBN3;A0A0A0MSQ0;P13796;P13797	U3KQI3;Q5TBN3;A0A0A0MSQ0;P13796;P13797	2;2;2;2;2	2;2;2;2;2	2;2;2;2;2	Plastin-2;Plastin-3	PLS3;LCP1	tr|U3KQI3|U3KQI3_HUMAN Plastin-3 (Fragment) OS=Homo sapiens GN=PLS3 PE=1 SV=1;tr|Q5TBN3|Q5TBN3_HUMAN Plastin-2 (Fragment) OS=Homo sapiens GN=LCP1 PE=1 SV=1;tr|A0A0A0MSQ0|A0A0A0MSQ0_HUMAN Plastin-3 OS=Homo sapiens GN=PLS3 PE=1 SV=1;sp|P13796|PLSL_HUMAN Plas	5	2	2	2	1	1	1	1	1	1	1	1	1	1	1	1	1	1	1	1	1	1	13.4	13.4	13.4	18.995	164	164;246;617;627;630	0	11.57	By matching	By matching	By matching	By MS/MS	By MS/MS	By MS/MS	5.5	5.5	5.5	5.5	5.5	7.9
A0A0B4J1W3;Q9BXJ9;Q6N069	A0A0B4J1W3;Q9BXJ9;Q6N069	2;2;1	2;2;1	2;2;1	N-alpha-acetyltransferase 15, NatA auxiliary subunit;N-alpha-acetyltransferase 16, NatA auxiliary subunit	NAA15;NAA16	tr|A0A0B4J1W3|A0A0B4J1W3_HUMAN N-alpha-acetyltransferase 15, NatA auxiliary subunit OS=Homo sapiens GN=NAA15 PE=1 SV=1;sp|Q9BXJ9|NAA15_HUMAN N-alpha-acetyltransferase 15, NatA auxiliary subunit OS=Homo sapiens GN=NAA15 PE=1 SV=1;sp|Q6N069|NAA16_HUMAN N-alp	3	2	2	2	1	0	1	2	1	1	1	0	1	2	1	1	1	0	1	2	1	1	2.5	2.5	2.5	101.2	865	865;866;864	0	12.014	By matching		By matching	By MS/MS	By matching	By matching	1.3	0	1.3	2.5	1.3	1.3
H0YC33;E5RH50;A0A0B4J210;Q6PKG0	H0YC33;E5RH50;A0A0B4J210;Q6PKG0	2;2;2;2	2;2;2;2	2;2;2;2	La-related protein 1	LARP1	tr|H0YC33|H0YC33_HUMAN La-related protein 1 (Fragment) OS=Homo sapiens GN=LARP1 PE=1 SV=1;tr|E5RH50|E5RH50_HUMAN La-related protein 1 (Fragment) OS=Homo sapiens GN=LARP1 PE=1 SV=7;tr|A0A0B4J210|A0A0B4J210_HUMAN La-related protein 1 (Fragment) OS=Homo sapie	4	2	2	2	1	0	2	2	2	2	1	0	2	2	2	2	1	0	2	2	2	2	13.1	13.1	13.1	20.78	183	183;611;816;1096	0	12.999	By matching		By MS/MS	By MS/MS	By MS/MS	By MS/MS	6.6	0	13.1	13.1	13.1	13.1
S4R456;K7EM56;A0A0B4J2B4;K7EJ78;S4R417;K7EQJ5;K7ELC2;P62841	S4R456;K7EM56;A0A0B4J2B4;K7EJ78;S4R417;K7EQJ5;K7ELC2;P62841	2;2;2;2;2;2;2;2	2;2;2;2;2;2;2;2	2;2;2;2;2;2;2;2	40S ribosomal protein S15	RPS15	tr|S4R456|S4R456_HUMAN 40S ribosomal protein S15 (Fragment) OS=Homo sapiens GN=RPS15 PE=1 SV=1;tr|K7EM56|K7EM56_HUMAN 40S ribosomal protein S15 OS=Homo sapiens GN=RPS15 PE=1 SV=2;tr|A0A0B4J2B4|A0A0B4J2B4_HUMAN 40S ribosomal protein S15 OS=Homo sapiens GN=R	8	2	2	2	1	0	2	2	2	2	1	0	2	2	2	2	1	0	2	2	2	2	19.1	19.1	19.1	8.0266	68	68;112;118;129;135;141;152;145	0	13.019	By MS/MS		By MS/MS	By MS/MS	By MS/MS	By MS/MS	17.6	0	19.1	19.1	19.1	19.1
F5GWX5;A0A0C4DGG9;Q14839	F5GWX5;A0A0C4DGG9;Q14839	2;2;2	2;2;2	2;2;2	Chromodomain-helicase-DNA-binding protein 4	CHD4	tr|F5GWX5|F5GWX5_HUMAN Chromodomain-helicase-DNA-binding protein 4 OS=Homo sapiens GN=CHD4 PE=1 SV=1;tr|A0A0C4DGG9|A0A0C4DGG9_HUMAN Chromodomain-helicase-DNA-binding protein 4 OS=Homo sapiens GN=CHD4 PE=1 SV=1;sp|Q14839|CHD4_HUMAN Chromodomain-helicase-DNA	3	2	2	2	0	0	0	2	2	1	0	0	0	2	2	1	0	0	0	2	2	1	1.4	1.4	1.4	217.1	1905	1905;1937;1912	0	13.696				By matching	By MS/MS	By matching	0	0	0	1.4	1.4	0.8
Q5QPR4;J3QR29;A0A0D9SEI3;Q5QPR3;B7ZVY7;A0A0D9SER5;A0A0D9SEN2;J3QR44;Q9UQ88;P21127	Q5QPR4;J3QR29;A0A0D9SEI3;Q5QPR3;B7ZVY7;A0A0D9SER5;A0A0D9SEN2;J3QR44;Q9UQ88;P21127	2;2;2;2;2;2;2;2;2;2	2;2;2;2;2;2;2;2;2;2	2;2;2;2;2;2;2;2;2;2	Cyclin-dependent kinase 11A;Cyclin-dependent kinase 11B	CDK11A;CDK11B;CDC2L1	tr|Q5QPR4|Q5QPR4_HUMAN Cyclin-dependent kinase 11A OS=Homo sapiens GN=CDK11A PE=1 SV=1;tr|J3QR29|J3QR29_HUMAN Cyclin-dependent kinase 11B OS=Homo sapiens GN=CDK11B PE=1 SV=2;tr|A0A0D9SEI3|A0A0D9SEI3_HUMAN Cyclin-dependent kinase 11B OS=Homo sapiens GN=CDK1	10	2	2	2	2	2	2	2	2	1	2	2	2	2	2	1	2	2	2	2	2	1	2.8	2.8	2.8	86.823	746	746;748;772;779;782;783;785;795;783;795	0	14.497	By MS/MS	By MS/MS	By MS/MS	By MS/MS	By MS/MS	By matching	2.8	2.8	2.8	2.8	2.8	1.5
C9J840;E7EX83;A0A0D9SG62;H7C0P6;E7ENQ1;G3XAA2;H7C360;G5E948;E7EN19;E7ESS2;A0A0D9SEY1;O95819	C9J840;E7EX83;A0A0D9SG62;H7C0P6;E7ENQ1;G3XAA2;H7C360;G5E948;E7EN19;E7ESS2;A0A0D9SEY1;O95819	2;2;2;2;2;2;2;2;2;2;2;2	2;2;2;2;2;2;2;2;2;2;2;2	2;2;2;2;2;2;2;2;2;2;2;2	Mitogen-activated protein kinase kinase kinase kinase 4	MAP4K4	tr|C9J840|C9J840_HUMAN Mitogen-activated protein kinase kinase kinase kinase 4 OS=Homo sapiens GN=MAP4K4 PE=1 SV=3;tr|E7EX83|E7EX83_HUMAN Mitogen-activated protein kinase kinase kinase kinase 4 OS=Homo sapiens GN=MAP4K4 PE=1 SV=1;tr|A0A0D9SG62|A0A0D9SG62_H	12	2	2	2	2	2	2	2	2	2	2	2	2	2	2	2	2	2	2	2	2	2	4.4	4.4	4.4	113.56	987	987;1038;1044;1056;1154;1165;1170;1235;1272;1273;1320;1239	0	11.181	By matching	By matching	By matching	By MS/MS	By MS/MS	By MS/MS	4.4	4.4	4.4	4.4	4.4	4.4
A0A0D9SF20;A6NLN1;A0A0U1RRM4;P26599;A0A087WUW5;K7EK45	A0A0D9SF20;A6NLN1;A0A0U1RRM4;P26599;A0A087WUW5;K7EK45	2;2;2;2;1;1	2;2;2;2;1;1	2;2;2;2;1;1	Polypyrimidine tract-binding protein 1	PTBP1	tr|A0A0D9SF20|A0A0D9SF20_HUMAN Polypyrimidine tract binding protein 1, isoform CRA_e OS=Homo sapiens GN=PTBP1 PE=1 SV=1;tr|A6NLN1|A6NLN1_HUMAN Polypyrimidine tract binding protein 1, isoform CRA_b OS=Homo sapiens GN=PTBP1 PE=1 SV=4;tr|A0A0U1RRM4|A0A0U1RRM4	6	2	2	2	1	1	2	2	2	2	1	1	2	2	2	2	1	1	2	2	2	2	9.6	9.6	9.6	21.913	197	197;527;588;531;82;256	0	12.737	By matching	By matching	By matching	By MS/MS	By MS/MS	By MS/MS	4.1	4.1	9.6	9.6	9.6	9.6
Q5JRC6;A0A0D9SGE8;Q8IWS0	Q5JRC6;A0A0D9SGE8;Q8IWS0	2;2;2	2;2;2	2;2;2	PHD finger protein 6	PHF6	tr|Q5JRC6|Q5JRC6_HUMAN PHD finger protein 6 OS=Homo sapiens GN=PHF6 PE=1 SV=1;tr|A0A0D9SGE8|A0A0D9SGE8_HUMAN PHD finger protein 6 OS=Homo sapiens GN=PHF6 PE=1 SV=1;sp|Q8IWS0|PHF6_HUMAN PHD finger protein 6 OS=Homo sapiens GN=PHF6 PE=1 SV=1	3	2	2	2	1	2	2	2	2	2	1	2	2	2	2	2	1	2	2	2	2	2	10.5	10.5	10.5	36.43	324	324;366;365	0	16.666	By matching	By matching	By MS/MS	By MS/MS	By MS/MS	By matching	4.9	10.5	10.5	10.5	10.5	10.5
C9K0U8;A0A0G2JLD8;E7EUY5;Q04837	C9K0U8;A0A0G2JLD8;E7EUY5;Q04837	2;2;2;2	2;2;2;2	2;2;2;2	Single-stranded DNA-binding protein, mitochondrial	SSBP1	tr|C9K0U8|C9K0U8_HUMAN Single-stranded DNA-binding protein, mitochondrial (Fragment) OS=Homo sapiens GN=SSBP1 PE=1 SV=1;tr|A0A0G2JLD8|A0A0G2JLD8_HUMAN Single-stranded DNA-binding protein, mitochondrial (Fragment) OS=Homo sapiens GN=SSBP1 PE=1 SV=1;tr|E7EUY	4	2	2	2	1	2	2	2	2	2	1	2	2	2	2	2	1	2	2	2	2	2	20.7	20.7	20.7	14.131	121	121;134;135;148	0	12.579	By matching	By matching	By matching	By MS/MS	By MS/MS	By MS/MS	8.3	20.7	20.7	20.7	20.7	20.7
A6NMQ3;Q5T5H1;O43768;H3BQ52;H3BTD3;H3BMD8;P56211	A6NMQ3;Q5T5H1;O43768;H3BQ52;H3BTD3;H3BMD8;P56211	2;2;2;1;1;1;1	2;2;2;1;1;1;1	2;2;2;1;1;1;1	Alpha-endosulfine;cAMP-regulated phosphoprotein 19	ENSA;ARPP19	tr|A6NMQ3|A6NMQ3_HUMAN Alpha-endosulfine OS=Homo sapiens GN=ENSA PE=1 SV=2;tr|Q5T5H1|Q5T5H1_HUMAN Alpha-endosulfine OS=Homo sapiens GN=ENSA PE=1 SV=1;sp|O43768|ENSA_HUMAN Alpha-endosulfine OS=Homo sapiens GN=ENSA PE=1 SV=1;tr|H3BQ52|H3BQ52_HUMAN cAMP-regul	7	2	2	2	1	2	2	2	2	1	1	2	2	2	2	1	1	2	2	2	2	1	20.7	20.7	20.7	15.634	140	140;187;121;71;72;131;112	0	12.285	By matching	By matching	By MS/MS	By MS/MS	By MS/MS	By MS/MS	7.9	20.7	20.7	20.7	20.7	7.9
J3QLE5;A8MT02;P63162;P14678;J3KRY3;S4R3P3	J3QLE5;A8MT02;P63162;P14678;J3KRY3;S4R3P3	2;2;2;2;1;1	2;2;2;2;1;1	2;2;2;2;1;1	Small nuclear ribonucleoprotein-associated protein N;Small nuclear ribonucleoprotein-associated proteins B and B	SNRPN;SNRPB	tr|J3QLE5|J3QLE5_HUMAN Small nuclear ribonucleoprotein-associated protein N (Fragment) OS=Homo sapiens GN=SNRPN PE=1 SV=1;tr|A8MT02|A8MT02_HUMAN Small nuclear ribonucleoprotein-associated proteins B and B OS=Homo sapiens GN=SNRPB PE=1 SV=3;sp|P63162|RSMN_	6	2	2	2	1	0	1	2	2	2	1	0	1	2	2	2	1	0	1	2	2	2	9.5	9.5	9.5	17.546	169	169;288;240;240;59;70	0	11.164	By matching		By matching	By MS/MS	By MS/MS	By matching	4.7	0	4.7	9.5	9.5	9.5
A8MX94;P09211;A0A087X2E9	A8MX94;P09211;A0A087X2E9	2;2;1	2;2;1	2;2;1	Glutathione S-transferase P	GSTP1	tr|A8MX94|A8MX94_HUMAN Glutathione S-transferase P OS=Homo sapiens GN=GSTP1 PE=1 SV=1;sp|P09211|GSTP1_HUMAN Glutathione S-transferase P OS=Homo sapiens GN=GSTP1 PE=1 SV=2;tr|A0A087X2E9|A0A087X2E9_HUMAN Glutathione S-transferase P (Fragment) OS=Homo sapiens	3	2	2	2	1	0	0	2	2	1	1	0	0	2	2	1	1	0	0	2	2	1	12.6	12.6	12.6	19.48	174	174;210;79	0	11.459	By matching			By MS/MS	By MS/MS	By matching	6.3	0	0	12.6	12.6	6.3
B0S8I6;Q14320;Q9Y247	B0S8I6;Q14320;Q9Y247	2;2;1	2;2;1	2;2;1	Protein FAM50A;Protein FAM50B	FAM50A;FAM50B	tr|B0S8I6|B0S8I6_HUMAN Protein FAM50A (Fragment) OS=Homo sapiens GN=FAM50A PE=1 SV=1;sp|Q14320|FA50A_HUMAN Protein FAM50A OS=Homo sapiens GN=FAM50A PE=1 SV=2;sp|Q9Y247|FA50B_HUMAN Protein FAM50B OS=Homo sapiens GN=FAM50B PE=1 SV=1	3	2	2	2	1	1	1	2	2	1	1	1	1	2	2	1	1	1	1	2	2	1	8.5	8.5	8.5	30.693	260	260;339;325	0	13.45	By matching	By matching	By MS/MS	By MS/MS	By MS/MS	By MS/MS	5	5	5	8.5	8.5	5
B0YIW6;P48444	B0YIW6;P48444	2;2	2;2	2;2	Coatomer subunit delta	ARCN1	tr|B0YIW6|B0YIW6_HUMAN Archain 1, isoform CRA_a OS=Homo sapiens GN=ARCN1 PE=1 SV=1;sp|P48444|COPD_HUMAN Coatomer subunit delta OS=Homo sapiens GN=ARCN1 PE=1 SV=1	2	2	2	2	1	1	2	2	2	2	1	1	2	2	2	2	1	1	2	2	2	2	4.9	4.9	4.9	61.626	552	552;511	0.0014144	11.016	By matching	By matching	By matching	By MS/MS	By MS/MS	By matching	2.4	2.5	4.9	4.9	4.9	4.9
B1AJQ6;Q86Y82	B1AJQ6;Q86Y82	2;2	2;2	2;2	Syntaxin-12	STX12	tr|B1AJQ6|B1AJQ6_HUMAN Syntaxin-12 (Fragment) OS=Homo sapiens GN=STX12 PE=1 SV=2;sp|Q86Y82|STX12_HUMAN Syntaxin-12 OS=Homo sapiens GN=STX12 PE=1 SV=1	2	2	2	2	1	0	1	2	2	1	1	0	1	2	2	1	1	0	1	2	2	1	11.6	11.6	11.6	24.576	215	215;276	0	11.962	By matching		By matching	By MS/MS	By MS/MS	By matching	7	0	7	11.6	11.6	4.7
B4DWR3;P61758	B4DWR3;P61758	2;2	2;2	2;2	Prefoldin subunit 3	VBP1	tr|B4DWR3|B4DWR3_HUMAN Prefoldin subunit 3 OS=Homo sapiens GN=VBP1 PE=1 SV=1;sp|P61758|PFD3_HUMAN Prefoldin subunit 3 OS=Homo sapiens GN=VBP1 PE=1 SV=3	2	2	2	2	2	1	2	2	2	0	2	1	2	2	2	0	2	1	2	2	2	0	11.5	11.5	11.5	22.254	192	192;197	0	12.173	By MS/MS	By matching	By matching	By MS/MS	By MS/MS		11.5	5.2	11.5	11.5	11.5	0
B4E3S0;Q9ULV4;H0YHL7	B4E3S0;Q9ULV4;H0YHL7	2;2;1	2;2;1	2;2;1	Coronin;Coronin-1C	CORO1C	tr|B4E3S0|B4E3S0_HUMAN Coronin OS=Homo sapiens GN=CORO1C PE=1 SV=1;sp|Q9ULV4|COR1C_HUMAN Coronin-1C OS=Homo sapiens GN=CORO1C PE=1 SV=1;tr|H0YHL7|H0YHL7_HUMAN Coronin-1C (Fragment) OS=Homo sapiens GN=CORO1C PE=1 SV=1	3	2	2	2	1	2	1	2	2	2	1	2	1	2	2	2	1	2	1	2	2	2	4.9	4.9	4.9	41.603	369	369;474;165	0.0014104	10.867	By matching	By matching	By matching	By MS/MS	By matching	By MS/MS	2.2	4.9	2.2	4.9	4.9	4.9
B5MD38;F5GZQ3;P55084	B5MD38;F5GZQ3;P55084	2;2;2	2;2;2	2;2;2	Trifunctional enzyme subunit beta, mitochondrial;3-ketoacyl-CoA thiolase	HADHB	tr|B5MD38|B5MD38_HUMAN Trifunctional enzyme subunit beta, mitochondrial OS=Homo sapiens GN=HADHB PE=1 SV=1;tr|F5GZQ3|F5GZQ3_HUMAN Trifunctional enzyme subunit beta, mitochondrial OS=Homo sapiens GN=HADHB PE=1 SV=1;sp|P55084|ECHB_HUMAN Trifunctional enzyme	3	2	2	2	1	0	0	2	1	2	1	0	0	2	1	2	1	0	0	2	1	2	9.4	9.4	9.4	37.924	351	351;459;474	0	13.64	By matching			By MS/MS	By MS/MS	By MS/MS	5.7	0	0	9.4	3.7	9.4
B7Z4L4;P04843	B7Z4L4;P04843	2;2	2;2	2;2	Dolichyl-diphosphooligosaccharide--protein glycosyltransferase subunit 1	RPN1	tr|B7Z4L4|B7Z4L4_HUMAN Dolichyl-diphosphooligosaccharide--protein glycosyltransferase subunit 1 OS=Homo sapiens GN=RPN1 PE=1 SV=1;sp|P04843|RPN1_HUMAN Dolichyl-diphosphooligosaccharide--protein glycosyltransferase subunit 1 OS=Homo sapiens GN=RPN1 PE=1 SV=	2	2	2	2	2	1	1	2	2	1	2	1	1	2	2	1	2	1	1	2	2	1	5.3	5.3	5.3	49.921	435	435;607	0	14.339	By MS/MS	By matching	By matching	By MS/MS	By MS/MS	By MS/MS	5.3	2.8	2.8	5.3	5.3	2.8
K7EN82;B7Z8J4;P30419	K7EN82;B7Z8J4;P30419	2;2;2	2;2;2	2;2;2	Glycylpeptide N-tetradecanoyltransferase 1	NMT1	tr|K7EN82|K7EN82_HUMAN Glycylpeptide N-tetradecanoyltransferase 1 (Fragment) OS=Homo sapiens GN=NMT1 PE=1 SV=1;tr|B7Z8J4|B7Z8J4_HUMAN Glycylpeptide N-tetradecanoyltransferase 1 OS=Homo sapiens GN=NMT1 PE=1 SV=1;sp|P30419|NMT1_HUMAN Glycylpeptide N-tetradec	3	2	2	2	1	1	1	2	2	0	1	1	1	2	2	0	1	1	1	2	2	0	34.7	34.7	34.7	8.1691	72	72;137;496	0	15.401	By matching	By matching	By MS/MS	By MS/MS	By MS/MS		18.1	18.1	18.1	34.7	34.7	0
B8ZZQ6;P06454;B8ZZA1;B8ZZW7;H7C2N1	B8ZZQ6;P06454;B8ZZA1;B8ZZW7;H7C2N1	2;2;1;1;1	2;2;1;1;1	2;2;1;1;1	Prothymosin alpha;Prothymosin alpha, N-terminally processed;Thymosin alpha-1	PTMA	tr|B8ZZQ6|B8ZZQ6_HUMAN Prothymosin alpha OS=Homo sapiens GN=PTMA PE=1 SV=1;sp|P06454|PTMA_HUMAN Prothymosin alpha OS=Homo sapiens GN=PTMA PE=1 SV=2;tr|B8ZZA1|B8ZZA1_HUMAN Prothymosin alpha OS=Homo sapiens GN=PTMA PE=1 SV=1;tr|B8ZZW7|B8ZZW7_HUMAN Prothymosi	5	2	2	2	0	0	1	0	1	2	0	0	1	0	1	2	0	0	1	0	1	2	22.4	22.4	22.4	11.758	107	107;111;131;136;148	0	13.766			By matching		By MS/MS	By MS/MS	0	0	9.3	0	13.1	22.4
B8ZZT4;Q9BV40	B8ZZT4;Q9BV40	2;2	2;2	2;2	Vesicle-associated membrane protein 8	VAMP8	tr|B8ZZT4|B8ZZT4_HUMAN Vesicle-associated membrane protein 8 OS=Homo sapiens GN=VAMP8 PE=1 SV=1;sp|Q9BV40|VAMP8_HUMAN Vesicle-associated membrane protein 8 OS=Homo sapiens GN=VAMP8 PE=1 SV=1	2	2	2	2	2	2	2	2	2	2	2	2	2	2	2	2	2	2	2	2	2	2	19.2	19.2	19.2	11.191	99	99;100	0	13.708	By MS/MS	By matching	By matching	By MS/MS	By MS/MS	By matching	19.2	19.2	19.2	19.2	19.2	19.2
C9J4N6;O75874;P48735	C9J4N6;O75874;P48735	2;2;1	2;2;1	2;2;1	Isocitrate dehydrogenase [NADP] cytoplasmic;Isocitrate dehydrogenase [NADP], mitochondrial	IDH1;IDH2	tr|C9J4N6|C9J4N6_HUMAN Isocitrate dehydrogenase [NADP] cytoplasmic (Fragment) OS=Homo sapiens GN=IDH1 PE=1 SV=1;sp|O75874|IDHC_HUMAN Isocitrate dehydrogenase [NADP] cytoplasmic OS=Homo sapiens GN=IDH1 PE=1 SV=2;sp|P48735|IDHP_HUMAN Isocitrate dehydrogenase	3	2	2	2	2	1	1	2	2	0	2	1	1	2	2	0	2	1	1	2	2	0	12.7	12.7	12.7	17.719	157	157;414;452	0	11.136	By matching	By matching	By matching	By MS/MS	By MS/MS		12.7	5.7	5.7	12.7	12.7	0
H7C2R6;C9JX57;D3DSE6;C9J818;H7BZW1;F8VZ95;P57076	H7C2R6;C9JX57;D3DSE6;C9J818;H7BZW1;F8VZ95;P57076	2;2;2;2;2;2;2	2;2;2;2;2;2;2	2;2;2;2;2;2;2	UPF0769 protein C21orf59	C21orf59	tr|H7C2R6|H7C2R6_HUMAN UPF0769 protein C21orf59 (Fragment) OS=Homo sapiens GN=C21orf59 PE=4 SV=1;tr|C9JX57|C9JX57_HUMAN UPF0769 protein C21orf59 (Fragment) OS=Homo sapiens GN=C21orf59 PE=4 SV=7;tr|D3DSE6|D3DSE6_HUMAN Chromosome 21 open reading frame 59, is	7	2	2	2	2	2	2	2	2	1	2	2	2	2	2	1	2	2	2	2	2	1	21.4	21.4	21.4	13.334	117	117;184;245;258;297;297;290	0	16.15	By matching	By MS/MS	By matching	By MS/MS	By MS/MS	By MS/MS	21.4	21.4	21.4	21.4	21.4	12
C9JN83;P41227;C9JW55;F8W808;A8MWP7;Q9BSU3	C9JN83;P41227;C9JW55;F8W808;A8MWP7;Q9BSU3	2;2;1;1;1;1	2;2;1;1;1;1	2;2;1;1;1;1	N-alpha-acetyltransferase 10;N-alpha-acetyltransferase 11	NAA10;NAA11	tr|C9JN83|C9JN83_HUMAN N-alpha-acetyltransferase 10 (Fragment) OS=Homo sapiens GN=NAA10 PE=1 SV=1;sp|P41227|NAA10_HUMAN N-alpha-acetyltransferase 10 OS=Homo sapiens GN=NAA10 PE=1 SV=1;tr|C9JW55|C9JW55_HUMAN N-alpha-acetyltransferase 10 (Fragment) OS=Homo s	6	2	2	2	1	1	1	2	1	2	1	1	1	2	1	2	1	1	1	2	1	2	13.4	13.4	13.4	16.685	142	142;235;146;169;184;229	0	12.889	By matching	By matching	By matching	By MS/MS	By MS/MS	By MS/MS	7	7	7	13.4	7	13.4
CON__P02662	CON__P02662	2	2	2				1	2	2	2	2	2	2	2	2	2	2	2	2	2	2	2	2	2	2	2	2	2	11.1	11.1	11.1	22.975	199	199	0	13.387	By MS/MS	By MS/MS	By MS/MS	By MS/MS	By MS/MS	By MS/MS	11.1	11.1	11.1	11.1	11.1	11.1
CON__P02668	CON__P02668	2	2	2				1	2	2	2	1	2	2	2	2	1	1	2	2	2	2	1	1	2	2	2	2	1	16.6	16.6	16.6	18.974	169	169	0	12.284	By MS/MS	By MS/MS	By matching	By MS/MS	By MS/MS	By matching	5.9	16.6	16.6	16.6	16.6	5.9
CON__P34955	CON__P34955	2	2	2				1	2	2	2	1	2	1	2	1	1	1	2	1	2	1	1	1	2	1	2	1	1	4.1	4.1	4.1	46.103	416	416	0	11.432	By matching	By matching	By MS/MS	By MS/MS	By MS/MS	By MS/MS	2.4	4.1	2.4	4.1	2.4	2.4
CON__Q58D62	CON__Q58D62	2	2	2				1	2	2	2	0	0	2	2	2	1	0	0	2	2	2	1	0	0	2	2	2	1	5.2	5.2	5.2	42.663	387	387	0	11.11			By MS/MS	By MS/MS	By matching	By matching	0	0	5.2	5.2	5.2	2.8
CON__Q9U6Y5	CON__Q9U6Y5	2	2	2				1	2	2	2	2	2	2	2	2	2	2	2	2	2	2	2	2	2	2	2	2	2	8	8	8	28.106	249	249	0	12.895	By MS/MS	By MS/MS	By MS/MS	By MS/MS	By MS/MS	By MS/MS	8	8	8	8	8	8
D6RGF4;D6R9I9;P61221;H0Y990	D6RGF4;D6R9I9;P61221;H0Y990	2;2;2;1	2;2;2;1	2;2;2;1	ATP-binding cassette sub-family E member 1	ABCE1	tr|D6RGF4|D6RGF4_HUMAN ATP-binding cassette sub-family E member 1 (Fragment) OS=Homo sapiens GN=ABCE1 PE=1 SV=1;tr|D6R9I9|D6R9I9_HUMAN ATP-binding cassette sub-family E member 1 OS=Homo sapiens GN=ABCE1 PE=1 SV=1;sp|P61221|ABCE1_HUMAN ATP-binding cassette	4	2	2	2	0	0	0	2	2	2	0	0	0	2	2	2	0	0	0	2	2	2	13.3	13.3	13.3	23.402	210	210;421;599;147	0	13.144				By MS/MS	By MS/MS	By MS/MS	0	0	0	13.3	13.3	13.3
E2QRB3;P32322;J3QLK9;J3QL23;J3QL32;J3QL24;J3QKT4;J3KQ22;J3KTA8;J3QKT3;J3KSA9;J3QRZ0;J3QR88;J3KR12	E2QRB3;P32322;J3QLK9;J3QL23;J3QL32;J3QL24;J3QKT4;J3KQ22	3;3;2;2;2;2;2;2;1;1;1;1;1;1	3;3;2;2;2;2;2;2;1;1;1;1;1;1	2;2;2;2;2;2;1;2;1;1;1;1;1;0	Pyrroline-5-carboxylate reductase 1, mitochondrial;Pyrroline-5-carboxylate reductase	PYCR1	tr|E2QRB3|E2QRB3_HUMAN Pyrroline-5-carboxylate reductase 1, isoform CRA_c OS=Homo sapiens GN=PYCR1 PE=1 SV=2;sp|P32322|P5CR1_HUMAN Pyrroline-5-carboxylate reductase 1, mitochondrial OS=Homo sapiens GN=PYCR1 PE=1 SV=2;tr|J3QLK9|J3QLK9_HUMAN Pyrroline-5-carb	14	3	3	2	0	0	1	3	2	2	0	0	1	3	2	2	0	0	1	2	1	2	14.2	14.2	9.7	30.213	288	288;319;165;173;217;225;242;253;84;94;109;115;132;359	0	17.708			By MS/MS	By MS/MS	By matching	By MS/MS	0	0	3.5	14.2	8	9.7
E7EPN9;Q9Y520	E7EPN9;Q9Y520	2;2	2;2	2;2	Protein PRRC2C	PRRC2C	tr|E7EPN9|E7EPN9_HUMAN Protein PRRC2C OS=Homo sapiens GN=PRRC2C PE=1 SV=1;sp|Q9Y520|PRC2C_HUMAN Protein PRRC2C OS=Homo sapiens GN=PRRC2C PE=1 SV=4	2	2	2	2	1	2	2	1	2	1	1	2	2	1	2	1	1	2	2	1	2	1	1.2	1.2	1.2	308.77	2819	2819;2896	0	17.437	By matching	By MS/MS	By MS/MS	By matching	By MS/MS	By matching	0.7	1.2	1.2	0.7	1.2	0.7
G5E9S2;E7ET17;E7EWE5;P51659;E7EPL9;E7ER27	G5E9S2;E7ET17;E7EWE5;P51659;E7EPL9;E7ER27	2;2;2;2;1;1	2;2;2;2;1;1	2;2;2;2;1;1	Peroxisomal multifunctional enzyme type 2;(3R)-hydroxyacyl-CoA dehydrogenase;Enoyl-CoA hydratase 2	HSD17B4	tr|G5E9S2|G5E9S2_HUMAN Hydroxysteroid (17-beta) dehydrogenase 4, isoform CRA_a OS=Homo sapiens GN=HSD17B4 PE=1 SV=1;tr|E7ET17|E7ET17_HUMAN Peroxisomal multifunctional enzyme type 2 OS=Homo sapiens GN=HSD17B4 PE=1 SV=1;tr|E7EWE5|E7EWE5_HUMAN Peroxisomal mul	6	2	2	2	0	1	1	2	2	2	0	1	1	2	2	2	0	1	1	2	2	2	4.5	4.5	4.5	64.592	596	596;599;712;736;474;500	0	11.758		By matching	By matching	By MS/MS	By MS/MS	By MS/MS	0	2.5	2.5	4.5	4.5	4.5
E7EX17;P23588;F8VX11	E7EX17;P23588;F8VX11	2;2;1	2;2;1	2;2;1	Eukaryotic translation initiation factor 4B	EIF4B	tr|E7EX17|E7EX17_HUMAN Eukaryotic translation initiation factor 4B OS=Homo sapiens GN=EIF4B PE=1 SV=1;sp|P23588|IF4B_HUMAN Eukaryotic translation initiation factor 4B OS=Homo sapiens GN=EIF4B PE=1 SV=2;tr|F8VX11|F8VX11_HUMAN Eukaryotic translation initiati	3	2	2	2	2	1	2	2	2	2	2	1	2	2	2	2	2	1	2	2	2	2	4.9	4.9	4.9	69.697	616	616;611;360	0	16.808	By matching	By matching	By matching	By MS/MS	By MS/MS	By MS/MS	4.9	2.6	4.9	4.9	4.9	4.9
E9PGZ1;E7EX44;Q05682;C9J813	E9PGZ1;E7EX44;Q05682;C9J813	2;2;2;1	2;2;2;1	2;2;2;1	Caldesmon	CALD1	tr|E9PGZ1|E9PGZ1_HUMAN Caldesmon OS=Homo sapiens GN=CALD1 PE=1 SV=1;tr|E7EX44|E7EX44_HUMAN Caldesmon OS=Homo sapiens GN=CALD1 PE=1 SV=1;sp|Q05682|CALD1_HUMAN Caldesmon OS=Homo sapiens GN=CALD1 PE=1 SV=3;tr|C9J813|C9J813_HUMAN Caldesmon (Fragment) OS=Homo s	4	2	2	2	0	1	2	2	2	2	0	1	2	2	2	2	0	1	2	2	2	2	6.2	6.2	6.2	61.705	536	536;557;793;459	0	20.162		By matching	By MS/MS	By MS/MS	By MS/MS	By MS/MS	0	3.9	6.2	6.2	6.2	6.2
E7EX90;Q14203;E7EWF7;Q6AWB1	E7EX90;Q14203;E7EWF7;Q6AWB1	2;2;1;1	2;2;1;1	2;2;1;1	Dynactin subunit 1	DCTN1;DKFZp686E0752	tr|E7EX90|E7EX90_HUMAN Dynactin subunit 1 OS=Homo sapiens GN=DCTN1 PE=1 SV=1;sp|Q14203|DCTN1_HUMAN Dynactin subunit 1 OS=Homo sapiens GN=DCTN1 PE=1 SV=3;tr|E7EWF7|E7EWF7_HUMAN Uncharacterized protein (Fragment) OS=Homo sapiens PE=4 SV=2;tr|Q6AWB1|Q6AWB1_HU	4	2	2	2	1	0	2	1	2	2	1	0	2	1	2	2	1	0	2	1	2	2	1.9	1.9	1.9	139.09	1256	1256;1278;191;890	0	13.317	By matching		By matching	By MS/MS	By MS/MS	By MS/MS	1	0	1.9	1	1.9	1.9
F8VZJ2;F8W0W4;H0YHX9;Q13765;E9PAV3;F8W1N5;F8VNW4	F8VZJ2;F8W0W4;H0YHX9;Q13765;E9PAV3;F8W1N5;F8VNW4	2;2;2;2;2;1;1	2;2;2;2;2;1;1	2;2;2;2;2;1;1	Nascent polypeptide-associated complex subunit alpha;Nascent polypeptide-associated complex subunit alpha, muscle-specific form	NACA	tr|F8VZJ2|F8VZJ2_HUMAN Nascent polypeptide-associated complex subunit alpha OS=Homo sapiens GN=NACA PE=1 SV=1;tr|F8W0W4|F8W0W4_HUMAN Nascent polypeptide-associated complex subunit alpha (Fragment) OS=Homo sapiens GN=NACA PE=1 SV=1;tr|H0YHX9|H0YHX9_HUMAN Na	7	2	2	2	1	1	1	2	2	1	1	1	1	2	2	1	1	1	1	2	2	1	20.6	20.6	20.6	15.016	136	136;198;213;215;2078;71;148	0	18.981	By matching	By matching	By matching	By MS/MS	By MS/MS	By MS/MS	11	11	11	20.6	20.6	11
E9PB61;Q86V81	E9PB61;Q86V81	2;2	2;2	2;2	THO complex subunit 4	ALYREF	tr|E9PB61|E9PB61_HUMAN THO complex subunit 4 OS=Homo sapiens GN=ALYREF PE=1 SV=1;sp|Q86V81|THOC4_HUMAN THO complex subunit 4 OS=Homo sapiens GN=ALYREF PE=1 SV=3	2	2	2	2	0	0	1	2	2	2	0	0	1	2	2	2	0	0	1	2	2	2	8	8	8	27.557	264	264;257	0	15.24			By matching	By MS/MS	By MS/MS	By MS/MS	0	0	3.8	8	8	8
E9PEX6;P09622	E9PEX6;P09622	2;2	2;2	2;2	Dihydrolipoyl dehydrogenase;Dihydrolipoyl dehydrogenase, mitochondrial	DLD	tr|E9PEX6|E9PEX6_HUMAN Dihydrolipoyl dehydrogenase OS=Homo sapiens GN=DLD PE=1 SV=1;sp|P09622|DLDH_HUMAN Dihydrolipoyl dehydrogenase, mitochondrial OS=Homo sapiens GN=DLD PE=1 SV=2	2	2	2	2	0	0	2	2	2	2	0	0	2	2	2	2	0	0	2	2	2	2	4.7	4.7	4.7	51.815	486	486;509	0	11.568			By MS/MS	By MS/MS	By MS/MS	By MS/MS	0	0	4.7	4.7	4.7	4.7
Q14DU5;E9PF63;O75116	Q14DU5;E9PF63;O75116	2;2;2	2;2;2	2;2;2	Rho-associated protein kinase 2	ROCK2	tr|Q14DU5|Q14DU5_HUMAN ROCK2 protein OS=Homo sapiens GN=ROCK2 PE=1 SV=1;tr|E9PF63|E9PF63_HUMAN Rho-associated protein kinase 2 OS=Homo sapiens GN=ROCK2 PE=1 SV=1;sp|O75116|ROCK2_HUMAN Rho-associated protein kinase 2 OS=Homo sapiens GN=ROCK2 PE=1 SV=4	3	2	2	2	1	1	1	2	2	1	1	1	1	2	2	1	1	1	1	2	2	1	3.4	3.4	3.4	82.148	703	703;1145;1388	0	11.181	By matching	By matching	By matching	By MS/MS	By MS/MS	By matching	1.4	1.4	1.4	3.4	3.4	1.4
E9PG15;P27348	E9PG15;P27348	4;4	2;2	2;2	14-3-3 protein theta	YWHAQ	tr|E9PG15|E9PG15_HUMAN 14-3-3 protein theta (Fragment) OS=Homo sapiens GN=YWHAQ PE=1 SV=1;sp|P27348|1433T_HUMAN 14-3-3 protein theta OS=Homo sapiens GN=YWHAQ PE=1 SV=1	2	4	2	2	4	3	4	4	3	4	2	2	2	2	2	2	2	2	2	2	2	2	25.5	15.4	15.4	17.048	149	149;245	0	15.405	By MS/MS	By MS/MS	By MS/MS	By MS/MS	By MS/MS	By MS/MS	25.5	20.8	25.5	25.5	20.8	25.5
E9PIA9;E9PLX0;E9PJJ3;E9PLC9;E9PMC6;E9PJA6;E9PSA6;E9PQB3;E9PRM1;P07384	E9PIA9;E9PLX0;E9PJJ3;E9PLC9;E9PMC6;E9PJA6;E9PSA6;E9PQB3;E9PRM1;P07384	2;2;2;2;2;2;2;2;2;2	2;2;2;2;2;2;2;2;2;2	2;2;2;2;2;2;2;2;2;2	Calpain-1 catalytic subunit	CAPN1	tr|E9PIA9|E9PIA9_HUMAN Calpain-1 catalytic subunit (Fragment) OS=Homo sapiens GN=CAPN1 PE=1 SV=1;tr|E9PLX0|E9PLX0_HUMAN Calpain-1 catalytic subunit (Fragment) OS=Homo sapiens GN=CAPN1 PE=1 SV=1;tr|E9PJJ3|E9PJJ3_HUMAN Calpain-1 catalytic subunit (Fragment)	10	2	2	2	1	1	0	2	2	2	1	1	0	2	2	2	1	1	0	2	2	2	30.2	30.2	30.2	7.1981	63	63;122;136;148;152;162;163;191;201;714	0	13.16	By matching	By matching		By MS/MS	By MS/MS	By MS/MS	15.9	15.9	0	30.2	30.2	30.2
E9PLA6;E9PJH8;E9PIG2;E9PRS3;E9PNX1;E9PK86;E9PMI5;E9PR70;E9PPV6;P50454;E9PQ34	E9PLA6;E9PJH8;E9PIG2;E9PRS3;E9PNX1;E9PK86;E9PMI5;E9PR70;E9PPV6;P50454;E9PQ34	2;2;2;2;2;2;2;2;2;2;1	2;2;2;2;2;2;2;2;2;2;1	2;2;2;2;2;2;2;2;2;2;1	Serpin H1	SERPINH1	tr|E9PLA6|E9PLA6_HUMAN Serpin H1 (Fragment) OS=Homo sapiens GN=SERPINH1 PE=1 SV=7;tr|E9PJH8|E9PJH8_HUMAN Serpin H1 (Fragment) OS=Homo sapiens GN=SERPINH1 PE=1 SV=1;tr|E9PIG2|E9PIG2_HUMAN Serpin H1 (Fragment) OS=Homo sapiens GN=SERPINH1 PE=1 SV=2;tr|E9PRS3|	11	2	2	2	0	1	1	2	2	2	0	1	1	2	2	2	0	1	1	2	2	2	26.7	26.7	26.7	8.8732	86	86;150;165;167;203;247;249;295;324;418;142	0	11.432		By matching	By matching	By MS/MS	By MS/MS	By matching	0	16.3	16.3	26.7	26.7	26.7
E9PKP7;E9PLT2;E9PMM2;H0YDH7	E9PKP7	82;25;18;1	2;0;0;0	2;0;0;0		UBTF	tr|E9PKP7|E9PKP7_HUMAN Nucleolar transcription factor 1 OS=Homo sapiens GN=UBTF PE=1 SV=1	4	82	2	2	81	80	82	74	79	77	2	2	2	2	2	2	2	2	2	2	2	2	69.7	1.6	1.6	87.435	745	745;194;149;36	0	16.26	By MS/MS	By MS/MS	By MS/MS	By MS/MS	By MS/MS	By MS/MS	68.9	66.6	69.7	65	68.3	68.3
F5H6X6;E9PKU7;Q14697	F5H6X6;E9PKU7;Q14697	2;2;2	2;2;2	2;2;2	Neutral alpha-glucosidase AB	GANAB	tr|F5H6X6|F5H6X6_HUMAN Neutral alpha-glucosidase AB OS=Homo sapiens GN=GANAB PE=1 SV=1;tr|E9PKU7|E9PKU7_HUMAN Neutral alpha-glucosidase AB OS=Homo sapiens GN=GANAB PE=1 SV=1;sp|Q14697|GANAB_HUMAN Neutral alpha-glucosidase AB OS=Homo sapiens GN=GANAB PE=1 S	3	2	2	2	0	1	1	1	1	2	0	1	1	1	1	2	0	1	1	1	1	2	3.8	3.8	3.8	96.215	847	847;852;944	0	12.663		By matching	By matching	By MS/MS	By MS/MS	By MS/MS	0	1.8	2	2	2	3.8
E9PN17;O75964	E9PN17;O75964	2;2	2;2	2;2	ATP synthase subunit g, mitochondrial	ATP5L	tr|E9PN17|E9PN17_HUMAN ATP synthase subunit g, mitochondrial OS=Homo sapiens GN=ATP5L PE=1 SV=1;sp|O75964|ATP5L_HUMAN ATP synthase subunit g, mitochondrial OS=Homo sapiens GN=ATP5L PE=1 SV=3	2	2	2	2	1	1	2	2	2	2	1	1	2	2	2	2	1	1	2	2	2	2	28.9	28.9	28.9	8.4518	76	76;103	0	12.159	By matching	By matching	By matching	By MS/MS	By MS/MS	By matching	11.8	11.8	28.9	28.9	28.9	28.9
E9PQ61;O75152	E9PQ61;O75152	2;2	2;2	2;2	Zinc finger CCCH domain-containing protein 11A	ZC3H11A	tr|E9PQ61|E9PQ61_HUMAN Zinc finger CCCH domain-containing protein 11A OS=Homo sapiens GN=ZC3H11A PE=1 SV=1;sp|O75152|ZC11A_HUMAN Zinc finger CCCH domain-containing protein 11A OS=Homo sapiens GN=ZC3H11A PE=1 SV=3	2	2	2	2	0	0	1	2	2	1	0	0	1	2	2	1	0	0	1	2	2	1	4.3	4.3	4.3	72.531	652	652;810	0	11.648			By matching	By MS/MS	By MS/MS	By matching	0	0	2.3	4.3	4.3	2
F2Z2C0;G3V1J5;Q9Y2L1	F2Z2C0;G3V1J5;Q9Y2L1	2;2;2	2;2;2	2;2;2	Exosome complex exonuclease RRP44	DIS3	tr|F2Z2C0|F2Z2C0_HUMAN Exosome complex exonuclease RRP44 OS=Homo sapiens GN=DIS3 PE=1 SV=1;tr|G3V1J5|G3V1J5_HUMAN Exosome complex exonuclease RRP44 OS=Homo sapiens GN=DIS3 PE=1 SV=1;sp|Q9Y2L1|RRP44_HUMAN Exosome complex exonuclease RRP44 OS=Homo sapiens GN	3	2	2	2	1	2	2	2	2	2	1	2	2	2	2	2	1	2	2	2	2	2	3.8	3.8	3.8	63.616	559	559;796;958	0	11.325	By matching	By matching	By matching	By MS/MS	By MS/MS	By matching	1.8	3.8	3.8	3.8	3.8	3.8
G3V5X8;G3V4Q2;G3V4V1;G3V1W4;G3V3G5;G3V2R6;F5H365;Q15436;G3V5K1;Q5QPE2;Q15437	G3V5X8;G3V4Q2;G3V4V1;G3V1W4;G3V3G5;G3V2R6;F5H365;Q15436;G3V5K1;Q5QPE2;Q15437	2;2;2;2;2;2;2;2;1;1;1	2;2;2;2;2;2;2;2;1;1;1	2;2;2;2;2;2;2;2;1;1;1	Protein transport protein Sec23A;Protein transport protein Sec23B	SEC23A;SEC23B	tr|G3V5X8|G3V5X8_HUMAN Protein transport protein Sec23A OS=Homo sapiens GN=SEC23A PE=1 SV=1;tr|G3V4Q2|G3V4Q2_HUMAN Protein transport protein Sec23A OS=Homo sapiens GN=SEC23A PE=1 SV=1;tr|G3V4V1|G3V4V1_HUMAN Protein transport protein Sec23A (Fragment) OS=Ho	11	2	2	2	2	2	2	2	2	2	2	2	2	2	2	2	2	2	2	2	2	2	27.1	27.1	27.1	9.9684	85	85;86;94;108;140;169;736;765;40;331;767	0.0014065	10.863	By matching	By matching	By matching	By MS/MS	By matching	By MS/MS	27.1	27.1	27.1	27.1	27.1	27.1
I3L0H8;F6QDS0;Q9NUU7;H3BTB3;H0YD26;H3BMQ5;H3BN59;I3L352;E9PR46;J3QL17;H3BQK0;Q9UMR2;Q9UHL0	I3L0H8;F6QDS0;Q9NUU7;H3BTB3;H0YD26;H3BMQ5;H3BN59;I3L352;E9PR46;J3QL17;H3BQK0;Q9UMR2;Q9UHL0	2;2;2;1;1;1;1;1;1;1;1;1;1	2;2;2;1;1;1;1;1;1;1;1;1;1	2;2;2;1;1;1;1;1;1;1;1;1;1	ATP-dependent RNA helicase DDX19A;ATP-dependent RNA helicase DDX19B;ATP-dependent RNA helicase DDX25	DDX19A;DDX25;DDX19B	tr|I3L0H8|I3L0H8_HUMAN ATP-dependent RNA helicase DDX19A OS=Homo sapiens GN=DDX19A PE=1 SV=1;tr|F6QDS0|F6QDS0_HUMAN HCG2043426, isoform CRA_b OS=Homo sapiens GN=hCG_2043426 PE=1 SV=1;sp|Q9NUU7|DD19A_HUMAN ATP-dependent RNA helicase DDX19A OS=Homo sapiens G	13	2	2	2	2	1	2	2	2	1	2	1	2	2	2	1	2	1	2	2	2	1	5.8	5.8	5.8	50.519	447	447;479;478;129;191;233;261;396;407;468;484;479;483	0	13.808	By matching	By matching	By matching	By MS/MS	By MS/MS	By MS/MS	5.8	3.4	5.8	5.8	5.8	3.4
F6RFD5;P60981	F6RFD5;P60981	2;2	2;2	2;2	Destrin	DSTN	tr|F6RFD5|F6RFD5_HUMAN Destrin OS=Homo sapiens GN=DSTN PE=1 SV=1;sp|P60981|DEST_HUMAN Destrin OS=Homo sapiens GN=DSTN PE=1 SV=3	2	2	2	2	2	2	2	2	2	1	2	2	2	2	2	1	2	2	2	2	2	1	17	17	17	15.397	135	135;165	0	16.107	By MS/MS	By MS/MS	By MS/MS	By MS/MS	By MS/MS	By MS/MS	17	17	17	17	17	8.9
F8VSD4;F8VV71;P61088;F8VZ29;F8VQQ8;Q5JXB2	F8VSD4;F8VV71;P61088;F8VZ29;F8VQQ8;Q5JXB2	2;2;2;1;1;1	2;2;2;1;1;1	2;2;2;1;1;1	Ubiquitin-conjugating enzyme E2 N;Putative ubiquitin-conjugating enzyme E2 N-like	UBE2N;UBE2NL	tr|F8VSD4|F8VSD4_HUMAN Ubiquitin-conjugating enzyme E2 N OS=Homo sapiens GN=UBE2N PE=1 SV=1;tr|F8VV71|F8VV71_HUMAN Ubiquitin-conjugating enzyme E2 N OS=Homo sapiens GN=UBE2N PE=1 SV=1;sp|P61088|UBE2N_HUMAN Ubiquitin-conjugating enzyme E2 N OS=Homo sapiens	6	2	2	2	1	1	1	2	2	1	1	1	1	2	2	1	1	1	1	2	2	1	16.2	16.2	16.2	11.983	105	105;152;152;87;89;153	0	12.441	By matching	By matching	By matching	By MS/MS	By MS/MS	By MS/MS	9.5	9.5	9.5	16.2	16.2	9.5
F8W810;Q2VIR3;P41091;H7BZU1	F8W810;Q2VIR3;P41091;H7BZU1	2;2;2;1	2;2;2;1	2;2;2;1	Putative eukaryotic translation initiation factor 2 subunit 3-like protein;Eukaryotic translation initiation factor 2 subunit 3	EIF2S3L;EIF2S3	tr|F8W810|F8W810_HUMAN Uncharacterized protein OS=Homo sapiens PE=4 SV=1;sp|Q2VIR3|IF2GL_HUMAN Putative eukaryotic translation initiation factor 2 subunit 3-like protein OS=Homo sapiens GN=EIF2S3L PE=5 SV=2;sp|P41091|IF2G_HUMAN Eukaryotic translation initi	4	2	2	2	2	2	1	2	2	1	2	2	1	2	2	1	2	2	1	2	2	1	5.6	5.6	5.6	50.529	466	466;472;472;183	0	15.153	By matching	By matching	By MS/MS	By MS/MS	By MS/MS	By MS/MS	5.6	5.6	3.4	5.6	5.6	3.4
G3V3U4;G3V3I1;G3V295;G3V5Z7;P60900	G3V3U4;G3V3I1;G3V295;G3V5Z7;P60900	2;2;2;2;2	2;2;2;2;2	2;2;2;2;2	Proteasome subunit alpha type;Proteasome subunit alpha type-6	PSMA6	tr|G3V3U4|G3V3U4_HUMAN Proteasome subunit alpha type OS=Homo sapiens GN=PSMA6 PE=1 SV=1;tr|G3V3I1|G3V3I1_HUMAN Proteasome subunit alpha type OS=Homo sapiens GN=PSMA6 PE=1 SV=1;tr|G3V295|G3V295_HUMAN Proteasome subunit alpha type OS=Homo sapiens GN=PSMA6 PE	5	2	2	2	1	1	2	2	2	2	1	1	2	2	2	2	1	1	2	2	2	2	20.6	20.6	20.6	11.57	107	107;148;203;252;246	0	14.733	By matching	By matching	By MS/MS	By MS/MS	By MS/MS	By MS/MS	12.1	8.4	20.6	20.6	20.6	20.6
G3V4M9;Q13572	G3V4M9;Q13572	2;2	2;2	2;2	Inositol-tetrakisphosphate 1-kinase	ITPK1	tr|G3V4M9|G3V4M9_HUMAN Inositol 1,3,4-triphosphate 5/6 kinase, isoform CRA_c OS=Homo sapiens GN=ITPK1 PE=1 SV=1;sp|Q13572|ITPK1_HUMAN Inositol-tetrakisphosphate 1-kinase OS=Homo sapiens GN=ITPK1 PE=1 SV=2	2	2	2	2	1	1	2	1	1	2	1	1	2	1	1	2	1	1	2	1	1	2	11.9	11.9	11.9	31.717	295	295;414	0	15.206	By matching	By MS/MS	By MS/MS	By MS/MS	By MS/MS	By MS/MS	4.4	4.4	11.9	4.4	4.4	11.9
G3V5M2;P00491;G3V393;G3V2H3	G3V5M2;P00491;G3V393;G3V2H3	2;2;1;1	2;2;1;1	2;2;1;1	Purine nucleoside phosphorylase	PNP	tr|G3V5M2|G3V5M2_HUMAN Purine nucleoside phosphorylase (Fragment) OS=Homo sapiens GN=PNP PE=1 SV=1;sp|P00491|PNPH_HUMAN Purine nucleoside phosphorylase OS=Homo sapiens GN=PNP PE=1 SV=2;tr|G3V393|G3V393_HUMAN Purine nucleoside phosphorylase (Fragment) OS=Ho	4	2	2	2	0	1	0	2	2	2	0	1	0	2	2	2	0	1	0	2	2	2	8.6	8.6	8.6	24.479	221	221;289;61;93	0	11.48		By matching		By MS/MS	By MS/MS	By matching	0	4.5	0	8.6	8.6	8.6
H3BR27;H0Y6E7;H3BT71;Q96E39;P38159;H3BNC1;O75526;Q8N7X1	H3BR27;H0Y6E7;H3BT71;Q96E39;P38159;H3BNC1;O75526;Q8N7X1	2;2;2;2;2;1;1;1	2;2;2;2;2;1;1;1	2;2;2;2;2;1;1;1	RNA binding motif protein, X-linked-like-1;RNA-binding motif protein, X chromosome;RNA-binding motif protein, X chromosome, N-terminally processed;RNA-binding motif protein, X-linked-like-2;RNA-binding motif protein, X-linked-like-3	RBMX;RBMXL1;RBMXL2;RBMXL3	tr|H3BR27|H3BR27_HUMAN RNA-binding motif protein, X chromosome OS=Homo sapiens GN=RBMX PE=1 SV=1;tr|H0Y6E7|H0Y6E7_HUMAN RNA-binding motif protein, X chromosome (Fragment) OS=Homo sapiens GN=RBMX PE=1 SV=2;tr|H3BT71|H3BT71_HUMAN RNA-binding motif protein, X	8	2	2	2	1	0	2	2	2	1	1	0	2	2	2	1	1	0	2	2	2	1	34.6	34.6	34.6	8.6098	78	78;292;296;390;391;37;392;1067	0	15.656	By matching		By matching	By MS/MS	By MS/MS	By MS/MS	17.9	0	34.6	34.6	34.6	16.7
H0YDU8;P53041;A8MU39	H0YDU8;P53041;A8MU39	2;2;1	2;2;1	2;2;1	Serine/threonine-protein phosphatase;Serine/threonine-protein phosphatase 5	PPP5C	tr|H0YDU8|H0YDU8_HUMAN Serine/threonine-protein phosphatase (Fragment) OS=Homo sapiens GN=PPP5C PE=1 SV=1;sp|P53041|PPP5_HUMAN Serine/threonine-protein phosphatase 5 OS=Homo sapiens GN=PPP5C PE=1 SV=1;tr|A8MU39|A8MU39_HUMAN Serine/threonine-protein phospha	3	2	2	2	2	2	2	2	2	1	2	2	2	2	2	1	2	2	2	2	2	1	5.4	5.4	5.4	55.096	485	485;499;371	0	15.45	By matching	By MS/MS	By MS/MS	By MS/MS	By MS/MS	By matching	5.4	5.4	5.4	5.4	5.4	2.7
H0YJP3;P23381	H0YJP3;P23381	2;2	2;2	2;2	Tryptophan--tRNA ligase, cytoplasmic;T1-TrpRS;T2-TrpRS	WARS	tr|H0YJP3|H0YJP3_HUMAN Tryptophan--tRNA ligase, cytoplasmic (Fragment) OS=Homo sapiens GN=WARS PE=1 SV=1;sp|P23381|SYWC_HUMAN Tryptophan--tRNA ligase, cytoplasmic OS=Homo sapiens GN=WARS PE=1 SV=2	2	2	2	2	0	2	2	2	2	2	0	2	2	2	2	2	0	2	2	2	2	2	21.6	21.6	21.6	20.016	185	185;471	0	11.338		By matching	By matching	By MS/MS	By MS/MS	By matching	0	21.6	21.6	21.6	21.6	21.6
H0YN14;Q8TEX9;H0YK93;H0YLV0;H0YL92;H0YKG5;H0YN07;H0YMR4	H0YN14;Q8TEX9;H0YK93;H0YLV0;H0YL92;H0YKG5;H0YN07;H0YMR4	2;2;1;1;1;1;1;1	2;2;1;1;1;1;1;1	2;2;1;1;1;1;1;1	Importin-4	IPO4	tr|H0YN14|H0YN14_HUMAN Importin-4 OS=Homo sapiens GN=IPO4 PE=1 SV=1;sp|Q8TEX9|IPO4_HUMAN Importin-4 OS=Homo sapiens GN=IPO4 PE=1 SV=2;tr|H0YK93|H0YK93_HUMAN Importin-4 OS=Homo sapiens GN=IPO4 PE=1 SV=1;tr|H0YLV0|H0YLV0_HUMAN Importin-4 OS=Homo sapiens GN=I	8	2	2	2	1	2	2	1	0	0	1	2	2	1	0	0	1	2	2	1	0	0	2.4	2.4	2.4	101.49	911	911;1081;48;98;101;154;312;547	0	13.035	By MS/MS	By matching	By matching	By MS/MS			1.2	2.4	2.4	1.2	0	0
H0YN26;P39687;O95626;O43423	H0YN26;P39687;O95626;O43423	2;2;1;1	2;2;1;1	2;2;1;1	Acidic leucine-rich nuclear phosphoprotein 32 family member A;Acidic leucine-rich nuclear phosphoprotein 32 family member D;Acidic leucine-rich nuclear phosphoprotein 32 family member C	ANP32A;ANP32D;ANP32C	tr|H0YN26|H0YN26_HUMAN Acidic leucine-rich nuclear phosphoprotein 32 family member A OS=Homo sapiens GN=ANP32A PE=1 SV=1;sp|P39687|AN32A_HUMAN Acidic leucine-rich nuclear phosphoprotein 32 family member A OS=Homo sapiens GN=ANP32A PE=1 SV=1;sp|O95626|AN32D	4	2	2	2	1	2	2	1	2	2	1	2	2	1	2	2	1	2	2	1	2	2	11.9	11.9	11.9	19.997	177	177;249;131;234	0	11.899	By matching	By matching	By matching	By MS/MS	By MS/MS	By MS/MS	6.2	11.9	11.9	6.2	11.9	11.9
H3BLV9;Q5R363;Q96SB4;D6RBF8	H3BLV9;Q5R363;Q96SB4;D6RBF8	2;2;2;1	2;2;2;1	2;2;2;1	SRSF protein kinase 1	SRPK1	tr|H3BLV9|H3BLV9_HUMAN SRSF protein kinase 1 (Fragment) OS=Homo sapiens GN=SRPK1 PE=1 SV=1;tr|Q5R363|Q5R363_HUMAN SRSF protein kinase 1 OS=Homo sapiens GN=SRPK1 PE=1 SV=2;sp|Q96SB4|SRPK1_HUMAN SRSF protein kinase 1 OS=Homo sapiens GN=SRPK1 PE=1 SV=2;tr|D6R	4	2	2	2	2	2	2	2	2	1	2	2	2	2	2	1	2	2	2	2	2	1	5.7	5.7	5.7	76.039	671	671;826;655;146	0	12.152	By matching	By matching	By matching	By MS/MS	By matching	By matching	5.7	5.7	5.7	5.7	5.7	2.4
H3BMH2;H3BSC1;P62491;Q15907;B4DQU5	H3BMH2;H3BSC1;P62491;Q15907;B4DQU5	2;2;2;2;1	2;2;2;2;1	2;2;2;2;1	Ras-related protein Rab-11A;Ras-related protein Rab-11B	RAB11A;RAB11B	tr|H3BMH2|H3BMH2_HUMAN Ras-related protein Rab-11A (Fragment) OS=Homo sapiens GN=RAB11A PE=4 SV=1;tr|H3BSC1|H3BSC1_HUMAN Ras-related protein Rab-11A OS=Homo sapiens GN=RAB11A PE=1 SV=1;sp|P62491|RB11A_HUMAN Ras-related protein Rab-11A OS=Homo sapiens GN=RA	5	2	2	2	2	0	1	2	2	1	2	0	1	2	2	1	2	0	1	2	2	1	13.5	13.5	13.5	17.668	155	155;198;216;218;146	0	11.866	By MS/MS		By matching	By MS/MS	By MS/MS	By matching	13.5	0	6.5	13.5	13.5	7.1
H3BPE7;P35637;A0A075B7D9;Q92804	H3BPE7;P35637;A0A075B7D9;Q92804	2;2;1;1	2;2;1;1	2;2;1;1	RNA-binding protein FUS;TATA-binding protein-associated factor 2N	FUS;TAF15	tr|H3BPE7|H3BPE7_HUMAN RNA-binding protein FUS OS=Homo sapiens GN=FUS PE=1 SV=1;sp|P35637|FUS_HUMAN RNA-binding protein FUS OS=Homo sapiens GN=FUS PE=1 SV=1;tr|A0A075B7D9|A0A075B7D9_HUMAN TATA-binding protein-associated factor 2N OS=Homo sapiens GN=TAF15 P	4	2	2	2	2	2	2	2	2	2	2	2	2	2	2	2	2	2	2	2	2	2	7.2	7.2	7.2	53.496	527	527;526;449;592	0	16.131	By matching	By matching	By matching	By MS/MS	By MS/MS	By MS/MS	7.2	7.2	7.2	7.2	7.2	7.2
H3BPJ9;O96000	H3BPJ9;O96000	2;2	2;2	2;2	NADH dehydrogenase [ubiquinone] 1 beta subcomplex subunit 10	NDUFB10	tr|H3BPJ9|H3BPJ9_HUMAN NADH dehydrogenase [ubiquinone] 1 beta subcomplex subunit 10 OS=Homo sapiens GN=NDUFB10 PE=1 SV=1;sp|O96000|NDUBA_HUMAN NADH dehydrogenase [ubiquinone] 1 beta subcomplex subunit 10 OS=Homo sapiens GN=NDUFB10 PE=1 SV=3	2	2	2	2	0	0	1	2	2	1	0	0	1	2	2	1	0	0	1	2	2	1	13	13	13	19.258	161	161;172	0	11.538			By matching	By MS/MS	By MS/MS	By matching	0	0	6.8	13	13	6.8
H3BRG4;P22695;H3BSJ9	H3BRG4;P22695;H3BSJ9	2;2;1	2;2;1	2;2;1	Cytochrome b-c1 complex subunit 2, mitochondrial	UQCRC2	tr|H3BRG4|H3BRG4_HUMAN Cytochrome b-c1 complex subunit 2, mitochondrial OS=Homo sapiens GN=UQCRC2 PE=1 SV=1;sp|P22695|QCR2_HUMAN Cytochrome b-c1 complex subunit 2, mitochondrial OS=Homo sapiens GN=UQCRC2 PE=1 SV=3;tr|H3BSJ9|H3BSJ9_HUMAN Cytochrome b-c1 com	3	2	2	2	0	0	0	2	1	0	0	0	0	2	1	0	0	0	0	2	1	0	7.3	7.3	7.3	44.634	412	412;453;336	0	12.532				By MS/MS	By MS/MS		0	0	0	7.3	3.4	0
H7BZ35;P14868	H7BZ35;P14868	2;2	2;2	2;2	Aspartate--tRNA ligase, cytoplasmic	DARS	tr|H7BZ35|H7BZ35_HUMAN Aspartate--tRNA ligase, cytoplasmic (Fragment) OS=Homo sapiens GN=DARS PE=1 SV=1;sp|P14868|SYDC_HUMAN Aspartate--tRNA ligase, cytoplasmic OS=Homo sapiens GN=DARS PE=1 SV=2	2	2	2	2	0	0	1	2	2	1	0	0	1	2	2	1	0	0	1	2	2	1	11.7	11.7	11.7	21.608	188	188;501	0	11.728			By matching	By MS/MS	By MS/MS	By matching	0	0	6.4	11.7	11.7	5.3
H7C5C7;P16333;C9J0K5;C9K098;C9JVV5;C9J869;C9JAB9	H7C5C7;P16333;C9J0K5;C9K098;C9JVV5;C9J869;C9JAB9	2;2;1;1;1;1;1	2;2;1;1;1;1;1	2;2;1;1;1;1;1	Cytoplasmic protein NCK1	NCK1	tr|H7C5C7|H7C5C7_HUMAN Cytoplasmic protein NCK1 (Fragment) OS=Homo sapiens GN=NCK1 PE=1 SV=1;sp|P16333|NCK1_HUMAN Cytoplasmic protein NCK1 OS=Homo sapiens GN=NCK1 PE=1 SV=1;tr|C9J0K5|C9J0K5_HUMAN Cytoplasmic protein NCK1 (Fragment) OS=Homo sapiens GN=NCK1	7	2	2	2	1	1	1	2	2	2	1	1	1	2	2	2	1	1	1	2	2	2	14.9	14.9	14.9	16.111	141	141;377;75;115;129;162;174	0	11.539	By matching	By matching	By matching	By MS/MS	By MS/MS	By MS/MS	7.8	7.8	7.8	14.9	14.9	14.9
I1E4Y6;Q6Y7W6;C9JH18	I1E4Y6;Q6Y7W6;C9JH18	2;2;1	2;2;1	2;2;1	PERQ amino acid-rich with GYF domain-containing protein 2	GIGYF2	tr|I1E4Y6|I1E4Y6_HUMAN PERQ amino acid-rich with GYF domain-containing protein 2 OS=Homo sapiens GN=GIGYF2 PE=1 SV=1;sp|Q6Y7W6|PERQ2_HUMAN PERQ amino acid-rich with GYF domain-containing protein 2 OS=Homo sapiens GN=GIGYF2 PE=1 SV=1;tr|C9JH18|C9JH18_HUMAN	3	2	2	2	2	2	2	2	2	2	2	2	2	2	2	2	2	2	2	2	2	2	2.2	2.2	2.2	152.53	1321	1321;1299;149	0	11.258	By matching	By matching	By MS/MS	By MS/MS	By matching	By matching	2.2	2.2	2.2	2.2	2.2	2.2
I3L0K7;Q12931;I3L239	I3L0K7;Q12931;I3L239	2;2;1	2;2;1	2;2;1	Heat shock protein 75 kDa, mitochondrial	TRAP1	tr|I3L0K7|I3L0K7_HUMAN Heat shock protein 75 kDa, mitochondrial OS=Homo sapiens GN=TRAP1 PE=1 SV=1;sp|Q12931|TRAP1_HUMAN Heat shock protein 75 kDa, mitochondrial OS=Homo sapiens GN=TRAP1 PE=1 SV=3;tr|I3L239|I3L239_HUMAN Heat shock protein 75 kDa, mitochond	3	2	2	2	2	2	2	2	2	2	2	2	2	2	2	2	2	2	2	2	2	2	4.8	4.8	4.8	57.219	495	495;704;215	0	13.981	By matching	By matching	By matching	By MS/MS	By MS/MS	By MS/MS	4.8	4.8	4.8	4.8	4.8	4.8
J3KQ32;Q9NTK5;C9JTK6	J3KQ32;Q9NTK5;C9JTK6	2;2;1	2;2;1	2;2;1	Obg-like ATPase 1	OLA1	tr|J3KQ32|J3KQ32_HUMAN Obg-like ATPase 1 OS=Homo sapiens GN=OLA1 PE=1 SV=1;sp|Q9NTK5|OLA1_HUMAN Obg-like ATPase 1 OS=Homo sapiens GN=OLA1 PE=1 SV=2;tr|C9JTK6|C9JTK6_HUMAN Obg-like ATPase 1 (Fragment) OS=Homo sapiens GN=OLA1 PE=1 SV=1	3	2	2	2	2	2	2	2	2	2	2	2	2	2	2	2	2	2	2	2	2	2	5.8	5.8	5.8	46.937	416	416;396;116	0	13.43	By matching	By matching	By matching	By MS/MS	By MS/MS	By MS/MS	5.8	5.8	5.8	5.8	5.8	5.8
J3KSI8;J3QQS1;J3QKW2;J3QLS3;Q9Y2R9	J3KSI8;J3QQS1;J3QKW2;J3QLS3;Q9Y2R9	2;2;2;2;2	2;2;2;2;2	2;2;2;2;2	28S ribosomal protein S7, mitochondrial	MRPS7	tr|J3KSI8|J3KSI8_HUMAN 28S ribosomal protein S7, mitochondrial (Fragment) OS=Homo sapiens GN=MRPS7 PE=1 SV=1;tr|J3QQS1|J3QQS1_HUMAN 28S ribosomal protein S7, mitochondrial (Fragment) OS=Homo sapiens GN=MRPS7 PE=1 SV=1;tr|J3QKW2|J3QKW2_HUMAN 28S ribosomal p	5	2	2	2	1	1	1	2	2	1	1	1	1	2	2	1	1	1	1	2	2	1	15.4	15.4	15.4	18.274	156	156;172;183;271;242	0	12.811	By MS/MS	By matching	By MS/MS	By MS/MS	By MS/MS	By matching	7.1	7.1	7.1	15.4	15.4	8.3
J3QLR8;Q9Y3D9	J3QLR8;Q9Y3D9	2;2	2;2	2;2	28S ribosomal protein S23, mitochondrial	MRPS23	tr|J3QLR8|J3QLR8_HUMAN 28S ribosomal protein S23, mitochondrial OS=Homo sapiens GN=MRPS23 PE=1 SV=1;sp|Q9Y3D9|RT23_HUMAN 28S ribosomal protein S23, mitochondrial OS=Homo sapiens GN=MRPS23 PE=1 SV=2	2	2	2	2	1	1	2	2	2	1	1	1	2	2	2	1	1	1	2	2	2	1	13.2	13.2	13.2	17.517	152	152;190	0	11.134	By matching	By matching	By matching	By matching	By MS/MS	By MS/MS	6.6	6.6	13.2	13.2	13.2	6.6
J3QSX4;J3QT28;O43684	J3QSX4;J3QT28;O43684	2;2;2	2;2;2	2;2;2	Mitotic checkpoint protein BUB3	BUB3	tr|J3QSX4|J3QSX4_HUMAN Mitotic checkpoint protein BUB3 OS=Homo sapiens GN=BUB3 PE=1 SV=1;tr|J3QT28|J3QT28_HUMAN Mitotic checkpoint protein BUB3 (Fragment) OS=Homo sapiens GN=BUB3 PE=1 SV=1;sp|O43684|BUB3_HUMAN Mitotic checkpoint protein BUB3 OS=Homo sapien	3	2	2	2	1	0	1	1	2	1	1	0	1	1	2	1	1	0	1	1	2	1	22.8	22.8	22.8	16.28	145	145;278;328	0	11.055	By matching		By matching	By MS/MS	By matching	By MS/MS	9	0	9	13.8	22.8	9
K7EP65;K7EKS7;K7ELC4;K7EMH1;K7ERI7;P35268;K7EJT5	K7EP65;K7EKS7;K7ELC4;K7EMH1;K7ERI7;P35268;K7EJT5	2;2;2;2;2;2;1	2;2;2;2;2;2;1	2;2;2;2;2;2;1	60S ribosomal protein L22	RPL22	tr|K7EP65|K7EP65_HUMAN 60S ribosomal protein L22 (Fragment) OS=Homo sapiens GN=RPL22 PE=1 SV=1;tr|K7EKS7|K7EKS7_HUMAN 60S ribosomal protein L22 OS=Homo sapiens GN=RPL22 PE=1 SV=1;tr|K7ELC4|K7ELC4_HUMAN 60S ribosomal protein L22 (Fragment) OS=Homo sapiens G	7	2	2	2	1	1	1	2	2	2	1	1	1	2	2	2	1	1	1	2	2	2	52.1	52.1	52.1	5.2389	48	48;53;79;89;95;128;47	0	14.93	By MS/MS	By matching	By MS/MS	By MS/MS	By MS/MS	By MS/MS	27.1	27.1	27.1	52.1	52.1	52.1
K7EM49;K7EPF6;P52209;K7EMN2	K7EM49;K7EPF6;P52209;K7EMN2	2;2;2;1	2;2;2;1	2;2;2;1	6-phosphogluconate dehydrogenase, decarboxylating	PGD	tr|K7EM49|K7EM49_HUMAN 6-phosphogluconate dehydrogenase, decarboxylating (Fragment) OS=Homo sapiens GN=PGD PE=1 SV=1;tr|K7EPF6|K7EPF6_HUMAN 6-phosphogluconate dehydrogenase, decarboxylating (Fragment) OS=Homo sapiens GN=PGD PE=1 SV=1;sp|P52209|6PGD_HUMAN 6	4	2	2	2	1	2	2	2	2	2	1	2	2	2	2	2	1	2	2	2	2	2	18.5	18.5	18.5	22.257	205	205;256;483;160	0	14.29	By matching	By matching	By matching	By MS/MS	By matching	By matching	10.2	18.5	18.5	18.5	18.5	18.5
M0QXM4;Q15758	M0QXM4;Q15758	2;2	2;2	2;2	Amino acid transporter;Neutral amino acid transporter B(0)	SLC1A5	tr|M0QXM4|M0QXM4_HUMAN Neutral amino acid transporter B(0) OS=Homo sapiens GN=SLC1A5 PE=1 SV=1;sp|Q15758|AAAT_HUMAN Neutral amino acid transporter B(0) OS=Homo sapiens GN=SLC1A5 PE=1 SV=2	2	2	2	2	1	2	2	2	2	2	1	2	2	2	2	2	1	2	2	2	2	2	6.8	6.8	6.8	39.443	365	365;541	0	15.031	By matching	By matching	By matching	By MS/MS	By MS/MS	By MS/MS	2.7	6.8	6.8	6.8	6.8	6.8
M0QYE0;M0R0I3;Q99961;Q99962	M0QYE0;M0R0I3;Q99961;Q99962	2;2;2;1	2;2;2;1	2;2;2;1	Endophilin-A2;Endophilin-A1	SH3GL1;SH3GL2	tr|M0QYE0|M0QYE0_HUMAN Endophilin-A2 (Fragment) OS=Homo sapiens GN=SH3GL1 PE=1 SV=7;tr|M0R0I3|M0R0I3_HUMAN Endophilin-A2 (Fragment) OS=Homo sapiens GN=SH3GL1 PE=1 SV=1;sp|Q99961|SH3G1_HUMAN Endophilin-A2 OS=Homo sapiens GN=SH3GL1 PE=1 SV=1;sp|Q99962|SH3G2_	4	2	2	2	2	1	2	2	2	1	2	1	2	2	2	1	2	1	2	2	2	1	19.4	19.4	19.4	14.401	129	129;139;368;352	0	14.105	By MS/MS	By MS/MS	By MS/MS	By MS/MS	By MS/MS	By matching	19.4	9.3	19.4	19.4	19.4	10.1
M0R3C3;Q9NZ01	M0R3C3;Q9NZ01	2;2	2;2	2;2	Very-long-chain enoyl-CoA reductase	TECR	tr|M0R3C3|M0R3C3_HUMAN Very-long-chain enoyl-CoA reductase OS=Homo sapiens GN=TECR PE=1 SV=1;sp|Q9NZ01|TECR_HUMAN Very-long-chain enoyl-CoA reductase OS=Homo sapiens GN=TECR PE=1 SV=1	2	2	2	2	0	0	1	2	1	1	0	0	1	2	1	1	0	0	1	2	1	1	20	20	20	11.773	105	105;308	0	12.805			By matching	By MS/MS	By MS/MS	By matching	0	0	10.5	20	9.5	10.5
O00299	O00299	2	2	2	Chloride intracellular channel protein 1	CLIC1	sp|O00299|CLIC1_HUMAN Chloride intracellular channel protein 1 OS=Homo sapiens GN=CLIC1 PE=1 SV=4	1	2	2	2	2	2	1	1	2	1	2	2	1	1	2	1	2	2	1	1	2	1	8.7	8.7	8.7	26.922	241	241	0	12.873	By matching	By matching	By matching	By MS/MS	By MS/MS	By MS/MS	8.7	8.7	5	5	8.7	5
O00499	O00499	2	2	2	Myc box-dependent-interacting protein 1	BIN1	sp|O00499|BIN1_HUMAN Myc box-dependent-interacting protein 1 OS=Homo sapiens GN=BIN1 PE=1 SV=1	1	2	2	2	2	2	2	2	2	0	2	2	2	2	2	0	2	2	2	2	2	0	5.4	5.4	5.4	64.699	593	593	0	15.445	By MS/MS	By matching	By matching	By MS/MS	By MS/MS		5.4	5.4	5.4	5.4	5.4	0
O14828	O14828	2	2	2	Secretory carrier-associated membrane protein 3	SCAMP3	sp|O14828|SCAM3_HUMAN Secretory carrier-associated membrane protein 3 OS=Homo sapiens GN=SCAMP3 PE=1 SV=3	1	2	2	2	2	1	2	2	2	2	2	1	2	2	2	2	2	1	2	2	2	2	10.7	10.7	10.7	38.287	347	347	0	15.425	By matching	By matching	By matching	By MS/MS	By MS/MS	By MS/MS	10.7	6.1	10.7	10.7	10.7	10.7
O15173	O15173	3	3	2	Membrane-associated progesterone receptor component 2	PGRMC2	sp|O15173|PGRC2_HUMAN Membrane-associated progesterone receptor component 2 OS=Homo sapiens GN=PGRMC2 PE=1 SV=1	1	3	3	2	2	2	1	3	3	1	2	2	1	3	3	1	1	1	0	2	2	0	13.9	13.9	9.9	23.818	223	223	0	18.877	By matching	By matching	By MS/MS	By MS/MS	By MS/MS	By MS/MS	7.6	10.3	4	13.9	13.9	4
O15212;A2AB88	O15212;A2AB88	2;1	2;1	2;1	Prefoldin subunit 6	PFDN6	sp|O15212|PFD6_HUMAN Prefoldin subunit 6 OS=Homo sapiens GN=PFDN6 PE=1 SV=1;tr|A2AB88|A2AB88_HUMAN Prefoldin subunit 6 OS=Homo sapiens GN=PFDN6 PE=1 SV=1	2	2	2	2	1	1	1	2	2	1	1	1	1	2	2	1	1	1	1	2	2	1	20.2	20.2	20.2	14.582	129	129;103	0	13.08	By matching	By matching	By matching	By MS/MS	By MS/MS	By matching	9.3	9.3	9.3	20.2	20.2	9.3
O15479	O15479	2	2	2	Melanoma-associated antigen B2	MAGEB2	sp|O15479|MAGB2_HUMAN Melanoma-associated antigen B2 OS=Homo sapiens GN=MAGEB2 PE=1 SV=3	1	2	2	2	0	0	0	1	1	1	0	0	0	1	1	1	0	0	0	1	1	1	7.5	7.5	7.5	35.277	319	319	0	11.436				By MS/MS	By MS/MS	By matching	0	0	0	5	2.5	5
O43242	O43242	2	2	2	26S proteasome non-ATPase regulatory subunit 3	PSMD3	sp|O43242|PSMD3_HUMAN 26S proteasome non-ATPase regulatory subunit 3 OS=Homo sapiens GN=PSMD3 PE=1 SV=2	1	2	2	2	1	0	2	2	2	2	1	0	2	2	2	2	1	0	2	2	2	2	4.5	4.5	4.5	60.977	534	534	0	12.56	By matching		By matching	By MS/MS	By MS/MS	By matching	2.4	0	4.5	4.5	4.5	4.5
O43390;B4DT28	O43390;B4DT28	6;3	2;2	2;2	Heterogeneous nuclear ribonucleoprotein R	HNRNPR	sp|O43390|HNRPR_HUMAN Heterogeneous nuclear ribonucleoprotein R OS=Homo sapiens GN=HNRNPR PE=1 SV=1;tr|B4DT28|B4DT28_HUMAN Heterogeneous nuclear ribonucleoprotein R OS=Homo sapiens GN=HNRNPR PE=1 SV=1	2	6	2	2	4	4	5	5	5	4	1	0	1	2	2	1	1	0	1	2	2	1	9	4.3	4.3	70.942	633	633;494	0	12.586	By matching	By matching	By matching	By MS/MS	By MS/MS	By MS/MS	5.5	4.7	6.8	8.8	8.8	6.6
O43719	O43719	2	2	2	HIV Tat-specific factor 1	HTATSF1	sp|O43719|HTSF1_HUMAN HIV Tat-specific factor 1 OS=Homo sapiens GN=HTATSF1 PE=1 SV=1	1	2	2	2	1	1	1	2	2	1	1	1	1	2	2	1	1	1	1	2	2	1	2	2	2	85.852	755	755	0	13.11	By MS/MS	By MS/MS	By MS/MS	By MS/MS	By MS/MS	By MS/MS	2	2	2	2	2	2
O75683	O75683	2	2	2	Surfeit locus protein 6	SURF6	sp|O75683|SURF6_HUMAN Surfeit locus protein 6 OS=Homo sapiens GN=SURF6 PE=1 SV=3	1	2	2	2	2	2	1	2	2	2	2	2	1	2	2	2	2	2	1	2	2	2	5.5	5.5	5.5	41.45	361	361	0	11.361	By matching	By matching	By MS/MS	By MS/MS	By MS/MS	By matching	5.5	5.5	2.5	5.5	5.5	5.5
O75822	O75822	2	2	2	Eukaryotic translation initiation factor 3 subunit J	EIF3J	sp|O75822|EIF3J_HUMAN Eukaryotic translation initiation factor 3 subunit J OS=Homo sapiens GN=EIF3J PE=1 SV=2	1	2	2	2	2	1	2	2	2	2	2	1	2	2	2	2	2	1	2	2	2	2	8.5	8.5	8.5	29.062	258	258	0	13.849	By matching	By matching	By matching	By MS/MS	By MS/MS	By MS/MS	8.5	4.3	8.5	8.5	8.5	8.5
O75937	O75937	2	2	2	DnaJ homolog subfamily C member 8	DNAJC8	sp|O75937|DNJC8_HUMAN DnaJ homolog subfamily C member 8 OS=Homo sapiens GN=DNAJC8 PE=1 SV=2	1	2	2	2	0	0	2	1	1	1	0	0	2	1	1	1	0	0	2	1	1	1	10.7	10.7	10.7	29.841	253	253	0	11.391			By MS/MS	By MS/MS	By matching	By MS/MS	0	0	10.7	3.2	7.5	7.5
O94826	O94826	2	2	2	Mitochondrial import receptor subunit TOM70	TOMM70A	sp|O94826|TOM70_HUMAN Mitochondrial import receptor subunit TOM70 OS=Homo sapiens GN=TOMM70 PE=1 SV=1	1	2	2	2	0	2	2	2	2	2	0	2	2	2	2	2	0	2	2	2	2	2	5.8	5.8	5.8	67.454	608	608	0	12.884		By matching	By matching	By matching	By MS/MS	By matching	0	5.8	5.8	5.8	5.8	5.8
O95104	O95104	2	2	2	Splicing factor, arginine/serine-rich 15	SCAF4	sp|O95104|SFR15_HUMAN Splicing factor, arginine/serine-rich 15 OS=Homo sapiens GN=SCAF4 PE=1 SV=3	1	2	2	2	1	1	0	2	2	2	1	1	0	2	2	2	1	1	0	2	2	2	3.7	3.7	3.7	125.87	1147	1147	0	12.78	By matching	By matching		By matching	By MS/MS	By matching	2.3	2.3	0	3.7	3.7	3.7
P00367;P49448	P00367;P49448	2;1	2;1	2;1	Glutamate dehydrogenase 1, mitochondrial;Glutamate dehydrogenase 2, mitochondrial	GLUD1;GLUD2	sp|P00367|DHE3_HUMAN Glutamate dehydrogenase 1, mitochondrial OS=Homo sapiens GN=GLUD1 PE=1 SV=2;sp|P49448|DHE4_HUMAN Glutamate dehydrogenase 2, mitochondrial OS=Homo sapiens GN=GLUD2 PE=1 SV=2	2	2	2	2	0	0	0	1	1	2	0	0	0	1	1	2	0	0	0	1	1	2	6.5	6.5	6.5	61.397	558	558;558	0	15.287				By matching	By MS/MS	By MS/MS	0	0	0	2.9	2.9	6.5
P00387;B1AHF3	P00387;B1AHF3	2;1	2;1	2;1	NADH-cytochrome b5 reductase 3;NADH-cytochrome b5 reductase 3 membrane-bound form;NADH-cytochrome b5 reductase 3 soluble form	CYB5R3	sp|P00387|NB5R3_HUMAN NADH-cytochrome b5 reductase 3 OS=Homo sapiens GN=CYB5R3 PE=1 SV=3;tr|B1AHF3|B1AHF3_HUMAN NADH-cytochrome b5 reductase 3 (Fragment) OS=Homo sapiens GN=CYB5R3 PE=1 SV=1	2	2	2	2	1	1	1	2	1	0	1	1	1	2	1	0	1	1	1	2	1	0	7.6	7.6	7.6	34.234	301	301;147	0	12.406	By matching	By matching	By matching	By MS/MS	By MS/MS		4	4	4	7.6	4	0
Q3BDU5;Q5TCI8;P02545	Q3BDU5;Q5TCI8;P02545	2;2;2	2;2;2	2;2;2	Prelamin-A/C;Lamin-A/C	LMNA	tr|Q3BDU5|Q3BDU5_HUMAN Prelamin-A/C OS=Homo sapiens GN=LMNA PE=1 SV=1;tr|Q5TCI8|Q5TCI8_HUMAN Prelamin-A/C OS=Homo sapiens GN=LMNA PE=1 SV=1;sp|P02545|LMNA_HUMAN Prelamin-A/C OS=Homo sapiens GN=LMNA PE=1 SV=1	3	2	2	2	2	2	1	2	1	1	2	2	1	2	1	1	2	2	1	2	1	1	6.2	6.2	6.2	55.637	487	487;491;664	0	12.238	By MS/MS	By MS/MS	By matching	By MS/MS	By matching	By matching	6.2	6.2	3.3	6.2	3.3	3.3
P04181	P04181	2	2	2	Ornithine aminotransferase, mitochondrial;Ornithine aminotransferase, hepatic form;Ornithine aminotransferase, renal form	OAT	sp|P04181|OAT_HUMAN Ornithine aminotransferase, mitochondrial OS=Homo sapiens GN=OAT PE=1 SV=1	1	2	2	2	0	0	1	2	2	2	0	0	1	2	2	2	0	0	1	2	2	2	5.7	5.7	5.7	48.534	439	439	0	12.396			By matching	By MS/MS	By MS/MS	By matching	0	0	3.2	5.7	5.7	5.7
P08243	P08243	2	2	2	Asparagine synthetase [glutamine-hydrolyzing]	ASNS	sp|P08243|ASNS_HUMAN Asparagine synthetase [glutamine-hydrolyzing] OS=Homo sapiens GN=ASNS PE=1 SV=4	1	2	2	2	1	1	1	1	2	1	1	1	1	1	2	1	1	1	1	1	2	1	3.7	3.7	3.7	64.369	561	561	0	12.127	By matching	By matching	By MS/MS	By MS/MS	By MS/MS	By MS/MS	2	2	2	2	3.7	2
P0DN79;P35520;C9JMA6	P0DN79;P35520;C9JMA6	2;2;1	2;2;1	2;2;1	Cystathionine beta-synthase	CBS	sp|P0DN79|CBSL_HUMAN Cystathionine beta-synthase-like protein OS=Homo sapiens GN=CBSL PE=1 SV=1;sp|P35520|CBS_HUMAN Cystathionine beta-synthase OS=Homo sapiens GN=CBS PE=1 SV=2;tr|C9JMA6|C9JMA6_HUMAN Cystathionine beta-synthase (Fragment) OS=Homo sapiens G	3	2	2	2	0	1	2	1	2	1	0	1	2	1	2	1	0	1	2	1	2	1	6.7	6.7	6.7	60.586	551	551;551;177	0	13.09		By matching	By matching	By MS/MS	By MS/MS	By matching	0	4.4	6.7	4.4	6.7	4.4
P11766;D6RFE4	P11766;D6RFE4	2;1	2;1	2;1	Alcohol dehydrogenase class-3	ADH5	sp|P11766|ADHX_HUMAN Alcohol dehydrogenase class-3 OS=Homo sapiens GN=ADH5 PE=1 SV=4;tr|D6RFE4|D6RFE4_HUMAN Alcohol dehydrogenase class-3 OS=Homo sapiens GN=ADH5 PE=1 SV=1	2	2	2	2	2	1	1	2	2	2	2	1	1	2	2	2	2	1	1	2	2	2	6.7	6.7	6.7	39.724	374	374;115	0	11.19	By matching	By matching	By matching	By matching	By MS/MS	By matching	6.7	4.5	4.5	6.7	6.7	6.7
P12236	P12236	8	2	2	ADP/ATP translocase 3;ADP/ATP translocase 3, N-terminally processed	SLC25A6	sp|P12236|ADT3_HUMAN ADP/ATP translocase 3 OS=Homo sapiens GN=SLC25A6 PE=1 SV=4	1	8	2	2	6	6	7	8	8	7	1	2	2	2	2	1	1	2	2	2	2	1	23.8	7.4	7.4	32.866	298	298	0	15.49	By matching	By MS/MS	By MS/MS	By MS/MS	By MS/MS	By MS/MS	18.8	20.5	23.2	23.8	23.8	20.8
P13489;E9PMJ3;E9PLZ3;E9PIM9	P13489;E9PMJ3;E9PLZ3;E9PIM9	2;1;1;1	2;1;1;1	2;1;1;1	Ribonuclease inhibitor	RNH1	sp|P13489|RINI_HUMAN Ribonuclease inhibitor OS=Homo sapiens GN=RNH1 PE=1 SV=2;tr|E9PMJ3|E9PMJ3_HUMAN Ribonuclease inhibitor (Fragment) OS=Homo sapiens GN=RNH1 PE=1 SV=1;tr|E9PLZ3|E9PLZ3_HUMAN Ribonuclease inhibitor (Fragment) OS=Homo sapiens GN=RNH1 PE=1 S	4	2	2	2	0	1	1	1	1	2	0	1	1	1	1	2	0	1	1	1	1	2	5.9	5.9	5.9	49.973	461	461;189;194;199	0	11.654		By matching	By matching	By MS/MS	By MS/MS	By MS/MS	0	2.6	2.6	2.6	2.6	5.9
P13667	P13667	2	2	2	Protein disulfide-isomerase A4	PDIA4	sp|P13667|PDIA4_HUMAN Protein disulfide-isomerase A4 OS=Homo sapiens GN=PDIA4 PE=1 SV=2	1	2	2	2	0	1	1	2	2	2	0	1	1	2	2	2	0	1	1	2	2	2	3.7	3.7	3.7	72.932	645	645	0	15.357		By matching	By MS/MS	By MS/MS	By MS/MS	By MS/MS	0	1.9	1.9	3.7	3.7	3.7
P14174	P14174	2	2	2	Macrophage migration inhibitory factor	MIF	sp|P14174|MIF_HUMAN Macrophage migration inhibitory factor OS=Homo sapiens GN=MIF PE=1 SV=4	1	2	2	2	2	2	2	1	2	2	2	2	2	1	2	2	2	2	2	1	2	2	17.4	17.4	17.4	12.476	115	115	0	20.367	By MS/MS	By MS/MS	By MS/MS	By MS/MS	By MS/MS	By MS/MS	17.4	17.4	17.4	9.6	17.4	17.4
V9GYG2;V9GYP9;Q5T621;P14550	V9GYG2;V9GYP9;Q5T621;P14550	2;2;2;2	2;2;2;2	2;2;2;2	Alcohol dehydrogenase [NADP(+)]	AKR1A1	tr|V9GYG2|V9GYG2_HUMAN Alcohol dehydrogenase [NADP(+)] OS=Homo sapiens GN=AKR1A1 PE=1 SV=1;tr|V9GYP9|V9GYP9_HUMAN Alcohol dehydrogenase [NADP(+)] (Fragment) OS=Homo sapiens GN=AKR1A1 PE=1 SV=1;tr|Q5T621|Q5T621_HUMAN Alcohol dehydrogenase [NADP(+)] (Fragmen	4	2	2	2	0	2	1	2	1	1	0	2	1	2	1	1	0	2	1	2	1	1	18.5	18.5	18.5	13.306	119	119;140;147;325	0	12.167		By matching	By matching	By MS/MS	By MS/MS	By matching	0	18.5	8.4	18.5	8.4	8.4
P16403	P16403	15	2	2	Histone H1.2	HIST1H1C	sp|P16403|H12_HUMAN Histone H1.2 OS=Homo sapiens GN=HIST1H1C PE=1 SV=2	1	15	2	2	14	14	15	13	15	13	1	1	2	1	2	1	1	1	2	1	2	1	41.3	9.9	9.9	21.364	213	213	0	16.178	By MS/MS	By MS/MS	By MS/MS	By MS/MS	By MS/MS	By MS/MS	39	39	41.3	39.4	41.3	39.4
W0S4B9;P16591	W0S4B9;P16591	2;2	2;2	2;2	Non-specific protein-tyrosine kinase;Tyrosine-protein kinase Fer	Pe1Fe10;FER	tr|W0S4B9|W0S4B9_HUMAN Tyrosine-protein kinase OS=Homo sapiens GN=Pe1Fe10 PE=1 SV=1;sp|P16591|FER_HUMAN Tyrosine-protein kinase Fer OS=Homo sapiens GN=FER PE=1 SV=2	2	2	2	2	0	0	1	2	2	1	0	0	1	2	2	1	0	0	1	2	2	1	5.4	5.4	5.4	46.954	411	411;822	0	11.841			By matching	By MS/MS	By MS/MS	By MS/MS	0	0	2.7	5.4	5.4	2.7
P16989;A0A0D9SEI8;Q9Y2T7	P16989	7;3;3	2;0;0	2;0;0	Y-box-binding protein 3	YBX3	sp|P16989|YBOX3_HUMAN Y-box-binding protein 3 OS=Homo sapiens GN=YBX3 PE=1 SV=4	3	7	2	2	5	5	5	6	7	6	2	2	2	2	2	2	2	2	2	2	2	2	17.5	9.9	9.9	40.089	372	372;92;364	0	11.844	By MS/MS	By matching	By MS/MS	By MS/MS	By MS/MS	By MS/MS	17.5	17.5	17.5	17.5	17.5	17.5
P18615	P18615	2	2	2	Negative elongation factor E	NELFE	sp|P18615|NELFE_HUMAN Negative elongation factor E OS=Homo sapiens GN=NELFE PE=1 SV=3	1	2	2	2	1	0	1	2	2	1	1	0	1	2	2	1	1	0	1	2	2	1	6.3	6.3	6.3	43.239	380	380	0	11.481	By matching		By matching	By MS/MS	By MS/MS	By matching	2.9	0	3.4	6.3	6.3	2.9
P20618	P20618	2	2	2	Proteasome subunit beta type-1	PSMB1	sp|P20618|PSB1_HUMAN Proteasome subunit beta type-1 OS=Homo sapiens GN=PSMB1 PE=1 SV=2	1	2	2	2	0	0	1	2	2	2	0	0	1	2	2	2	0	0	1	2	2	2	11.6	11.6	11.6	26.489	241	241	0	13.077			By matching	By MS/MS	By MS/MS	By MS/MS	0	0	5.8	11.6	11.6	11.6
P21912;A0A087WXX8;A0A087WWT1	P21912;A0A087WXX8;A0A087WWT1	2;1;1	2;1;1	2;1;1	Succinate dehydrogenase [ubiquinone] iron-sulfur subunit, mitochondrial	SDHB	sp|P21912|SDHB_HUMAN Succinate dehydrogenase [ubiquinone] iron-sulfur subunit, mitochondrial OS=Homo sapiens GN=SDHB PE=1 SV=3;tr|A0A087WXX8|A0A087WXX8_HUMAN Succinate dehydrogenase [ubiquinone] iron-sulfur subunit, mitochondrial (Fragment) OS=Homo sapiens	3	2	2	2	0	0	1	2	2	2	0	0	1	2	2	2	0	0	1	2	2	2	7.1	7.1	7.1	31.629	280	280;123;200	0	12.387			By matching	By matching	By MS/MS	By matching	0	0	3.9	7.1	7.1	7.1
P23526	P23526	2	2	2	Adenosylhomocysteinase	AHCY	sp|P23526|SAHH_HUMAN Adenosylhomocysteinase OS=Homo sapiens GN=AHCY PE=1 SV=4	1	2	2	2	1	1	1	1	2	1	1	1	1	1	2	1	1	1	1	1	2	1	4.9	4.9	4.9	47.716	432	432	0	12.878	By matching	By matching	By MS/MS	By MS/MS	By MS/MS	By MS/MS	3.2	3.2	3.2	3.2	4.9	3.2
P25398	P25398	2	2	2	40S ribosomal protein S12	RPS12	sp|P25398|RS12_HUMAN 40S ribosomal protein S12 OS=Homo sapiens GN=RPS12 PE=1 SV=3	1	2	2	2	2	2	2	2	2	2	2	2	2	2	2	2	2	2	2	2	2	2	13.6	13.6	13.6	14.515	132	132	0	11.14	By matching	By matching	By MS/MS	By MS/MS	By MS/MS	By matching	13.6	13.6	13.6	13.6	13.6	13.6
P26038	P26038	6	2	2	Moesin	MSN	sp|P26038|MOES_HUMAN Moesin OS=Homo sapiens GN=MSN PE=1 SV=3	1	6	2	2	5	4	5	5	6	3	1	1	1	1	2	0	1	1	1	1	2	0	8.7	3.1	3.1	67.819	577	577	0	12.378	By matching	By matching	By MS/MS	By MS/MS	By MS/MS	By matching	7.3	7.3	7.3	7.3	8.7	5.5
P33991	P33991	2	2	2	DNA replication licensing factor MCM4	MCM4	sp|P33991|MCM4_HUMAN DNA replication licensing factor MCM4 OS=Homo sapiens GN=MCM4 PE=1 SV=5	1	2	2	2	2	1	2	2	2	2	2	1	2	2	2	2	2	1	2	2	2	2	2.2	2.2	2.2	96.557	863	863	0	11.171	By matching	By matching	By matching	By MS/MS	By MS/MS	By MS/MS	2.2	1	2.2	2.2	2.2	2.2
P35241	P35241	6	2	2	Radixin	RDX	sp|P35241|RADI_HUMAN Radixin OS=Homo sapiens GN=RDX PE=1 SV=1	1	6	2	2	6	4	6	6	6	5	2	1	2	2	2	2	2	1	2	2	2	2	9.4	3.9	3.9	68.563	583	583	0	11.46	By matching	By matching	By matching	By MS/MS	By MS/MS	By matching	9.4	7.7	9.4	9.4	9.4	9.4
P36551;H0YA22	P36551;H0YA22	2;1	2;1	2;1	Oxygen-dependent coproporphyrinogen-III oxidase, mitochondrial	CPOX	sp|P36551|HEM6_HUMAN Oxygen-dependent coproporphyrinogen-III oxidase, mitochondrial OS=Homo sapiens GN=CPOX PE=1 SV=3;tr|H0YA22|H0YA22_HUMAN Oxygen-dependent coproporphyrinogen-III oxidase, mitochondrial (Fragment) OS=Homo sapiens GN=CPOX PE=1 SV=1	2	2	2	2	1	2	2	2	1	1	1	2	2	2	1	1	1	2	2	2	1	1	5.3	5.3	5.3	50.151	454	454;70	0	12.161	By matching	By matching	By matching	By MS/MS	By MS/MS	By matching	2.4	5.3	5.3	5.3	2.9	2.9
P37108;H0YLA2	P37108;H0YLA2	2;1	2;1	2;1	Signal recognition particle 14 kDa protein	SRP14	sp|P37108|SRP14_HUMAN Signal recognition particle 14 kDa protein OS=Homo sapiens GN=SRP14 PE=1 SV=2;tr|H0YLA2|H0YLA2_HUMAN Signal recognition particle 14 kDa protein OS=Homo sapiens GN=SRP14 PE=1 SV=1	2	2	2	2	2	2	2	2	2	2	2	2	2	2	2	2	2	2	2	2	2	2	20.6	20.6	20.6	14.57	136	136;115	0	14.345	By matching	By matching	By MS/MS	By MS/MS	By MS/MS	By MS/MS	20.6	20.6	20.6	20.6	20.6	20.6
P42166	P42166	8	2	2	Lamina-associated polypeptide 2, isoform alpha;Thymopoietin;Thymopentin	TMPO	sp|P42166|LAP2A_HUMAN Lamina-associated polypeptide 2, isoform alpha OS=Homo sapiens GN=TMPO PE=1 SV=2	1	8	2	2	4	5	6	7	8	7	0	0	1	2	2	1	0	0	1	2	2	1	15.1	3	3	75.491	694	694	0.0014124	10.935	By matching	By matching	By matching	By MS/MS	By MS/MS	By matching	7.9	9.8	11.1	12.8	15.1	13.8
P42677;C9J1C5;Q5T4L4;H0YMV8;Q71UM5	P42677;C9J1C5;Q5T4L4;H0YMV8;Q71UM5	2;1;1;1;1	2;1;1;1;1	2;1;1;1;1	40S ribosomal protein S27;40S ribosomal protein S27-like	RPS27;RPS27L	sp|P42677|RS27_HUMAN 40S ribosomal protein S27 OS=Homo sapiens GN=RPS27 PE=1 SV=3;tr|C9J1C5|C9J1C5_HUMAN 40S ribosomal protein S27 OS=Homo sapiens GN=RPS27L PE=3 SV=1;tr|Q5T4L4|Q5T4L4_HUMAN 40S ribosomal protein S27 OS=Homo sapiens GN=RPS27 PE=1 SV=1;tr|H0	5	2	2	2	2	2	2	2	2	2	2	2	2	2	2	2	2	2	2	2	2	2	22.6	22.6	22.6	9.461	84	84;52;66;100;84	0	15.755	By MS/MS	By MS/MS	By MS/MS	By MS/MS	By MS/MS	By MS/MS	22.6	22.6	22.6	22.6	22.6	22.6
P43897;C9JG32;C9JT21;F8VPA7;F8VS27	P43897;C9JG32;C9JT21;F8VPA7;F8VS27	2;1;1;1;1	2;1;1;1;1	2;1;1;1;1	Elongation factor Ts, mitochondrial;Elongation factor Ts	TSFM	sp|P43897|EFTS_HUMAN Elongation factor Ts, mitochondrial OS=Homo sapiens GN=TSFM PE=1 SV=2;tr|C9JG32|C9JG32_HUMAN Elongation factor Ts (Fragment) OS=Homo sapiens GN=TSFM PE=1 SV=1;tr|C9JT21|C9JT21_HUMAN Elongation factor Ts (Fragment) OS=Homo sapiens GN=TS	5	2	2	2	0	1	1	2	2	2	0	1	1	2	2	2	0	1	1	2	2	2	9.2	9.2	9.2	35.39	325	325;140;169;200;230	0	11.694		By matching	By matching	By MS/MS	By MS/MS	By MS/MS	0	5.2	5.2	9.2	9.2	9.2
P48634	P48634	2	2	2	Protein PRRC2A	PRRC2A	sp|P48634|PRC2A_HUMAN Protein PRRC2A OS=Homo sapiens GN=PRRC2A PE=1 SV=3	1	2	2	2	0	1	2	2	2	1	0	1	2	2	2	1	0	1	2	2	2	1	1.9	1.9	1.9	228.86	2157	2157	0	12.017		By matching	By matching	By MS/MS	By MS/MS	By matching	0	1.1	1.9	1.9	1.9	1.1
P49189	P49189	2	2	2	4-trimethylaminobutyraldehyde dehydrogenase	ALDH9A1	sp|P49189|AL9A1_HUMAN 4-trimethylaminobutyraldehyde dehydrogenase OS=Homo sapiens GN=ALDH9A1 PE=1 SV=3	1	2	2	2	1	1	1	2	2	1	1	1	1	2	2	1	1	1	1	2	2	1	5.3	5.3	5.3	53.801	494	494	0	13.027	By matching	By matching	By matching	By MS/MS	By MS/MS	By MS/MS	2.8	2.8	2.8	5.3	5.3	2.4
Q5HY57;P50402	Q5HY57;P50402	2;2	2;2	2;2	Emerin	EMD	tr|Q5HY57|Q5HY57_HUMAN Emerin OS=Homo sapiens GN=EMD PE=1 SV=1;sp|P50402|EMD_HUMAN Emerin OS=Homo sapiens GN=EMD PE=1 SV=1	2	2	2	2	2	1	1	2	2	2	2	1	1	2	2	2	2	1	1	2	2	2	13.2	13.2	13.2	24.938	219	219;254	0	11.703	By matching	By matching	By MS/MS	By MS/MS	By MS/MS	By MS/MS	13.2	5.5	5.5	13.2	13.2	13.2
P51991;H7C1J8	P51991;H7C1J8	2;1	2;1	2;1	Heterogeneous nuclear ribonucleoprotein A3	HNRNPA3	sp|P51991|ROA3_HUMAN Heterogeneous nuclear ribonucleoprotein A3 OS=Homo sapiens GN=HNRNPA3 PE=1 SV=2;tr|H7C1J8|H7C1J8_HUMAN Heterogeneous nuclear ribonucleoprotein A3 (Fragment) OS=Homo sapiens GN=HNRNPA3 PE=1 SV=1	2	2	2	2	1	1	1	1	1	2	1	1	1	1	1	2	1	1	1	1	1	2	8.5	8.5	8.5	39.594	378	378;115	0	11.879	By matching	By matching	By matching	By MS/MS	By matching	By MS/MS	5.8	5.8	5.8	5.8	5.8	8.5
P52907;C9JUG7;F8W9N7;A0A0D9SET8;P47755	P52907;C9JUG7;F8W9N7;A0A0D9SET8;P47755	2;1;1;1;1	2;1;1;1;1	2;1;1;1;1	F-actin-capping protein subunit alpha-1;F-actin-capping protein subunit alpha-2	CAPZA1;CAPZA2	sp|P52907|CAZA1_HUMAN F-actin-capping protein subunit alpha-1 OS=Homo sapiens GN=CAPZA1 PE=1 SV=3;tr|C9JUG7|C9JUG7_HUMAN F-actin-capping protein subunit alpha-2 OS=Homo sapiens GN=CAPZA2 PE=1 SV=1;tr|F8W9N7|F8W9N7_HUMAN F-actin-capping protein subunit alph	5	2	2	2	1	1	1	1	2	2	1	1	1	1	2	2	1	1	1	1	2	2	9.8	9.8	9.8	32.922	286	286;146;174;174;286	0	13.153	By MS/MS	By matching	By MS/MS	By MS/MS	By MS/MS	By matching	3.5	3.5	3.5	3.5	9.8	9.8
P53621	P53621	2	2	2	Coatomer subunit alpha;Xenin;Proxenin	COPA	sp|P53621|COPA_HUMAN Coatomer subunit alpha OS=Homo sapiens GN=COPA PE=1 SV=2	1	2	2	2	1	1	2	2	2	2	1	1	2	2	2	2	1	1	2	2	2	2	2	2	2	138.34	1224	1224	0	13.083	By matching	By matching	By matching	By MS/MS	By MS/MS	By MS/MS	1.1	1.1	2	2	2	2
P54709;H7C4L9;C9JA36	P54709;H7C4L9;C9JA36	2;1;1	2;1;1	2;1;1	Sodium/potassium-transporting ATPase subunit beta-3	ATP1B3	sp|P54709|AT1B3_HUMAN Sodium/potassium-transporting ATPase subunit beta-3 OS=Homo sapiens GN=ATP1B3 PE=1 SV=1;tr|H7C4L9|H7C4L9_HUMAN Sodium/potassium-transporting ATPase subunit beta-3 (Fragment) OS=Homo sapiens GN=ATP1B3 PE=1 SV=1;tr|C9JA36|C9JA36_HUMAN S	3	2	2	2	1	0	0	2	2	2	1	0	0	2	2	2	1	0	0	2	2	2	10.8	10.8	10.8	31.512	279	279;27;133	0	11.885	By matching			By MS/MS	By matching	By matching	3.9	0	0	10.8	10.8	10.8
P55010;H0YK29;H0YK11;H0YMJ8;H0YM54;H0YLZ1;H0YN40	P55010;H0YK29;H0YK11;H0YMJ8;H0YM54;H0YLZ1;H0YN40	2;1;1;1;1;1;1	2;1;1;1;1;1;1	2;1;1;1;1;1;1	Eukaryotic translation initiation factor 5	EIF5	sp|P55010|IF5_HUMAN Eukaryotic translation initiation factor 5 OS=Homo sapiens GN=EIF5 PE=1 SV=2;tr|H0YK29|H0YK29_HUMAN Eukaryotic translation initiation factor 5 (Fragment) OS=Homo sapiens GN=EIF5 PE=1 SV=1;tr|H0YK11|H0YK11_HUMAN Eukaryotic translation in	7	2	2	2	2	2	2	2	2	2	2	2	2	2	2	2	2	2	2	2	2	2	4.9	4.9	4.9	49.222	431	431;51;69;101;109;146;200	0	14.276	By matching	By MS/MS	By MS/MS	By MS/MS	By MS/MS	By MS/MS	4.9	4.9	4.9	4.9	4.9	4.9
Q5VWC4;P55036;H0Y3Y9;A6PVX3	Q5VWC4;P55036;H0Y3Y9;A6PVX3	2;2;1;1	2;2;1;1	2;2;1;1	26S proteasome non-ATPase regulatory subunit 4	PSMD4	tr|Q5VWC4|Q5VWC4_HUMAN 26S proteasome non-ATPase regulatory subunit 4 OS=Homo sapiens GN=PSMD4 PE=1 SV=1;sp|P55036|PSMD4_HUMAN 26S proteasome non-ATPase regulatory subunit 4 OS=Homo sapiens GN=PSMD4 PE=1 SV=1;tr|H0Y3Y9|H0Y3Y9_HUMAN 26S proteasome non-ATPas	4	2	2	2	1	1	1	2	1	1	1	1	1	2	1	1	1	1	1	2	1	1	6.6	6.6	6.6	41.079	380	380;377;193;203	0	13.93	By matching	By MS/MS	By MS/MS	By MS/MS	By MS/MS	By MS/MS	3.9	3.9	3.9	6.6	3.9	3.9
P61081;M0QX69	P61081;M0QX69	2;1	2;1	2;1	NEDD8-conjugating enzyme Ubc12	UBE2M	sp|P61081|UBC12_HUMAN NEDD8-conjugating enzyme Ubc12 OS=Homo sapiens GN=UBE2M PE=1 SV=1;tr|M0QX69|M0QX69_HUMAN NEDD8-conjugating enzyme Ubc12 (Fragment) OS=Homo sapiens GN=UBE2M PE=1 SV=7	2	2	2	2	2	2	2	2	2	1	2	2	2	2	2	1	2	2	2	2	2	1	10.4	10.4	10.4	20.9	183	183;70	0	18.022	By MS/MS	By MS/MS	By MS/MS	By MS/MS	By MS/MS	By MS/MS	10.4	10.4	10.4	10.4	10.4	6
P62195;J3QRR3;J3QRW1;J3QLH6;J3KRP2;J3QSA9;J3QQM1;Q8NB90	P62195;J3QRR3;J3QRW1;J3QLH6;J3KRP2;J3QSA9;J3QQM1;Q8NB90	2;1;1;1;1;1;1;1	2;1;1;1;1;1;1;1	2;1;1;1;1;1;1;1	26S protease regulatory subunit 8;Spermatogenesis-associated protein 5	PSMC5;SPATA5	sp|P62195|PRS8_HUMAN 26S protease regulatory subunit 8 OS=Homo sapiens GN=PSMC5 PE=1 SV=1;tr|J3QRR3|J3QRR3_HUMAN 26S protease regulatory subunit 8 (Fragment) OS=Homo sapiens GN=PSMC5 PE=1 SV=1;tr|J3QRW1|J3QRW1_HUMAN 26S protease regulatory subunit 8 (Fragm	8	2	2	2	1	1	1	2	1	1	1	1	1	2	1	1	1	1	1	2	1	1	6.4	6.4	6.4	45.626	406	406;127;143;215;241;257;263;893	0	11.813	By matching	By matching	By MS/MS	By MS/MS	By MS/MS	By matching	3.4	3.4	3.4	6.4	3.4	3.4
P62273;A0A087WTT6	P62273;A0A087WTT6	2;1	2;1	2;1	40S ribosomal protein S29	RPS29	sp|P62273|RS29_HUMAN 40S ribosomal protein S29 OS=Homo sapiens GN=RPS29 PE=1 SV=2;tr|A0A087WTT6|A0A087WTT6_HUMAN 40S ribosomal protein S29 OS=Homo sapiens GN=RPS29 PE=1 SV=1	2	2	2	2	2	2	2	2	2	2	2	2	2	2	2	2	2	2	2	2	2	2	32.1	32.1	32.1	6.6767	56	56;53	0	14.633	By MS/MS	By matching	By MS/MS	By MS/MS	By MS/MS	By matching	32.1	32.1	32.1	32.1	32.1	32.1
P62318	P62318	2	2	2	Small nuclear ribonucleoprotein Sm D3	SNRPD3	sp|P62318|SMD3_HUMAN Small nuclear ribonucleoprotein Sm D3 OS=Homo sapiens GN=SNRPD3 PE=1 SV=1	1	2	2	2	2	1	2	2	2	2	2	1	2	2	2	2	2	1	2	2	2	2	15.1	15.1	15.1	13.916	126	126	0	47.441	By matching	By matching	By MS/MS	By MS/MS	By MS/MS	By MS/MS	15.1	7.1	15.1	15.1	15.1	15.1
P62857	P62857	2	2	2	40S ribosomal protein S28	RPS28	sp|P62857|RS28_HUMAN 40S ribosomal protein S28 OS=Homo sapiens GN=RPS28 PE=1 SV=1	1	2	2	2	0	1	2	2	2	2	0	1	2	2	2	2	0	1	2	2	2	2	29	29	29	7.8409	69	69	0	13.327		By matching	By MS/MS	By MS/MS	By MS/MS	By MS/MS	0	15.9	29	29	29	29
Q59GN2;P62891	Q59GN2;P62891	2;2	2;2	2;2	Putative 60S ribosomal protein L39-like 5;60S ribosomal protein L39	RPL39P5;RPL39	sp|Q59GN2|R39L5_HUMAN Putative 60S ribosomal protein L39-like 5 OS=Homo sapiens GN=RPL39P5 PE=5 SV=2;sp|P62891|RL39_HUMAN 60S ribosomal protein L39 OS=Homo sapiens GN=RPL39 PE=1 SV=2	2	2	2	2	1	1	1	1	2	2	1	1	1	1	2	2	1	1	1	1	2	2	23.5	23.5	23.5	6.3225	51	51;51	0	23.283	By MS/MS	By matching	By MS/MS	By MS/MS	By MS/MS	By MS/MS	19.6	19.6	19.6	19.6	23.5	23.5
P62913;Q5VVC9;Q5VVC8	P62913;Q5VVC9;Q5VVC8	2;1;1	2;1;1	2;1;1	60S ribosomal protein L11	RPL11	sp|P62913|RL11_HUMAN 60S ribosomal protein L11 OS=Homo sapiens GN=RPL11 PE=1 SV=2;tr|Q5VVC9|Q5VVC9_HUMAN 60S ribosomal protein L11 (Fragment) OS=Homo sapiens GN=RPL11 PE=1 SV=1;tr|Q5VVC8|Q5VVC8_HUMAN 60S ribosomal protein L11 (Fragment) OS=Homo sapiens GN=	3	2	2	2	2	2	2	2	2	2	2	2	2	2	2	2	2	2	2	2	2	2	12.9	12.9	12.9	20.252	178	178;131;174	0	14.449	By MS/MS	By MS/MS	By MS/MS	By MS/MS	By MS/MS	By MS/MS	12.9	12.9	12.9	12.9	12.9	12.9
P62942;Q1JUQ3;Q1JUQ5;A0A087WTS4;Q5W0X3;A0A087WV48;A0A087WZM5	P62942;Q1JUQ3;Q1JUQ5;A0A087WTS4;Q5W0X3;A0A087WV48;A0A087WZM5	2;1;1;1;1;1;1	2;1;1;1;1;1;1	2;1;1;1;1;1;1	Peptidyl-prolyl cis-trans isomerase FKBP1A;Peptidyl-prolyl cis-trans isomerase	FKBP1A;FKBP12-Exin;FKBP12-Exip2	sp|P62942|FKB1A_HUMAN Peptidyl-prolyl cis-trans isomerase FKBP1A OS=Homo sapiens GN=FKBP1A PE=1 SV=2;tr|Q1JUQ3|Q1JUQ3_HUMAN FK506 binding protein12 OS=Homo sapiens GN=FKBP12-Exin PE=2 SV=1;tr|Q1JUQ5|Q1JUQ5_HUMAN Peptidyl-prolyl cis-trans isomerase OS=Homo	7	2	2	2	1	2	2	2	2	1	1	2	2	2	2	1	1	2	2	2	2	1	25	25	25	11.951	108	108;37;92;97;103;116;129	0	15.792	By MS/MS	By MS/MS	By MS/MS	By MS/MS	By MS/MS	By matching	12	25	25	25	25	13
P68133;P68032;A6NL76;P63267;P62736;F8WB63;B8ZZJ2;C9JFL5;F6UVQ4;F6QUT6	P68133;P68032;A6NL76;P63267;P62736;F8WB63;B8ZZJ2;C9JFL5;F6UVQ4;F6QUT6	14;14;13;13;13;8;8;8;8;8	2;2;2;2;2;2;2;2;2;2	2;2;2;2;2;2;2;2;2;2	Actin, alpha skeletal muscle;Actin, alpha cardiac muscle 1;Actin, gamma-enteric smooth muscle;Actin, aortic smooth muscle	ACTA1;ACTC1;ACTG2;ACTA2	sp|P68133|ACTS_HUMAN Actin, alpha skeletal muscle OS=Homo sapiens GN=ACTA1 PE=1 SV=1;sp|P68032|ACTC_HUMAN Actin, alpha cardiac muscle 1 OS=Homo sapiens GN=ACTC1 PE=1 SV=1;tr|A6NL76|A6NL76_HUMAN Actin, alpha skeletal muscle OS=Homo sapiens GN=ACTA1 PE=1 SV=	10	14	2	2	10	11	12	13	14	14	0	1	1	1	2	2	0	1	1	1	2	2	31	6.1	6.1	42.051	377	377;377;254;376;377;105;119;145;151;151	0	11.619	By matching	By matching	By matching	By matching	By MS/MS	By matching	24.4	29.4	30.2	31	31	31
P82675	P82675	2	2	2	28S ribosomal protein S5, mitochondrial	MRPS5	sp|P82675|RT05_HUMAN 28S ribosomal protein S5, mitochondrial OS=Homo sapiens GN=MRPS5 PE=1 SV=2	1	2	2	2	1	1	2	2	2	2	1	1	2	2	2	2	1	1	2	2	2	2	4	4	4	48.006	430	430	0	12.488	By MS/MS	By matching	By MS/MS	By MS/MS	By MS/MS	By matching	2.1	2.1	4	4	4	4
P82933	P82933	2	2	2	28S ribosomal protein S9, mitochondrial	MRPS9	sp|P82933|RT09_HUMAN 28S ribosomal protein S9, mitochondrial OS=Homo sapiens GN=MRPS9 PE=1 SV=2	1	2	2	2	0	1	2	2	2	1	0	1	2	2	2	1	0	1	2	2	2	1	7.1	7.1	7.1	45.834	396	396	0	11.714		By matching	By matching	By MS/MS	By MS/MS	By matching	0	3.8	7.1	7.1	7.1	3.3
Q00059;H7BYN3	Q00059;H7BYN3	2;1	2;1	2;1	Transcription factor A, mitochondrial	TFAM	sp|Q00059|TFAM_HUMAN Transcription factor A, mitochondrial OS=Homo sapiens GN=TFAM PE=1 SV=1;tr|H7BYN3|H7BYN3_HUMAN Transcription factor A, mitochondrial (Fragment) OS=Homo sapiens GN=TFAM PE=1 SV=1	2	2	2	2	0	0	2	2	2	0	0	0	2	2	2	0	0	0	2	2	2	0	8.9	8.9	8.9	29.096	246	246;219	0	13.873			By MS/MS	By MS/MS	By MS/MS		0	0	8.9	8.9	8.9	0
Q00796;H0YKB3;H0YLA4	Q00796;H0YKB3;H0YLA4	2;1;1	2;1;1	2;1;1	Sorbitol dehydrogenase	SORD	sp|Q00796|DHSO_HUMAN Sorbitol dehydrogenase OS=Homo sapiens GN=SORD PE=1 SV=4;tr|H0YKB3|H0YKB3_HUMAN Sorbitol dehydrogenase OS=Homo sapiens GN=SORD PE=1 SV=1;tr|H0YLA4|H0YLA4_HUMAN Sorbitol dehydrogenase OS=Homo sapiens GN=SORD PE=1 SV=1	3	2	2	2	0	2	2	2	2	2	0	2	2	2	2	2	0	2	2	2	2	2	8.1	8.1	8.1	38.324	357	357;117;336	0	16.864		By matching	By MS/MS	By MS/MS	By MS/MS	By MS/MS	0	8.1	8.1	8.1	8.1	8.1
Q02040	Q02040	2	2	2	A-kinase anchor protein 17A	AKAP17A	sp|Q02040|AK17A_HUMAN A-kinase anchor protein 17A OS=Homo sapiens GN=AKAP17A PE=1 SV=2	1	2	2	2	2	2	2	2	2	2	2	2	2	2	2	2	2	2	2	2	2	2	3.5	3.5	3.5	80.735	695	695	0	13.269	By MS/MS	By matching	By matching	By MS/MS	By MS/MS	By matching	3.5	3.5	3.5	3.5	3.5	3.5
Q04917;F8WEB6;A2IDB1	Q04917	5;2;2	2;1;1	2;1;1	14-3-3 protein eta	YWHAH	sp|Q04917|1433F_HUMAN 14-3-3 protein eta OS=Homo sapiens GN=YWHAH PE=1 SV=4	3	5	2	2	4	3	5	4	3	5	1	1	2	1	1	2	1	1	2	1	1	2	17.9	9.3	9.3	28.218	246	246;39;72	0	12.969	By matching	By matching	By matching	By MS/MS	By MS/MS	By MS/MS	14.2	11.4	17.9	14.2	11.4	17.9
Q07065	Q07065	2	2	2	Cytoskeleton-associated protein 4	CKAP4	sp|Q07065|CKAP4_HUMAN Cytoskeleton-associated protein 4 OS=Homo sapiens GN=CKAP4 PE=1 SV=2	1	2	2	2	0	0	0	2	2	2	0	0	0	2	2	2	0	0	0	2	2	2	5.1	5.1	5.1	66.022	602	602	0	12.686				By MS/MS	By MS/MS	By matching	0	0	0	5.1	5.1	5.1
Q07812	Q07812	2	2	2	Apoptosis regulator BAX	BAX	sp|Q07812|BAX_HUMAN Apoptosis regulator BAX OS=Homo sapiens GN=BAX PE=1 SV=1	1	2	2	2	2	2	2	2	2	2	2	2	2	2	2	2	2	2	2	2	2	2	13	13	13	21.184	192	192	0	13.676	By MS/MS	By MS/MS	By MS/MS	By MS/MS	By MS/MS	By MS/MS	13	13	13	13	13	13
Q12874	Q12874	2	2	2	Splicing factor 3A subunit 3	SF3A3	sp|Q12874|SF3A3_HUMAN Splicing factor 3A subunit 3 OS=Homo sapiens GN=SF3A3 PE=1 SV=1	1	2	2	2	2	2	1	1	1	1	2	2	1	1	1	1	2	2	1	1	1	1	8	8	8	58.848	501	501	0	11.786	By MS/MS	By matching	By matching	By matching	By MS/MS	By matching	8	8	6.2	1.8	1.8	1.8
Q12986	Q12986	2	2	2	Transcriptional repressor NF-X1	NFX1	sp|Q12986|NFX1_HUMAN Transcriptional repressor NF-X1 OS=Homo sapiens GN=NFX1 PE=1 SV=2	1	2	2	2	2	1	1	0	1	1	2	1	1	0	1	1	2	1	1	0	1	1	3.2	3.2	3.2	124.39	1120	1120	0	11.169	By MS/MS	By MS/MS	By matching		By matching	By matching	3.2	2.1	2.1	0	2.1	2.1
Q13045	Q13045	2	2	2	Protein flightless-1 homolog	FLII	sp|Q13045|FLII_HUMAN Protein flightless-1 homolog OS=Homo sapiens GN=FLII PE=1 SV=2	1	2	2	2	1	1	0	1	2	0	1	1	0	1	2	0	1	1	0	1	2	0	2	2	2	144.75	1269	1269	0	11.855	By matching	By matching		By MS/MS	By MS/MS		1.1	1.1	0	1.1	2	0
Q13428;J3KQ96;H0YA99	Q13428;J3KQ96	11;9;1	11;9;1	2;0;0	Treacle protein	TCOF1	sp|Q13428|TCOF_HUMAN Treacle protein OS=Homo sapiens GN=TCOF1 PE=1 SV=3;tr|J3KQ96|J3KQ96_HUMAN Treacle protein (Fragment) OS=Homo sapiens GN=TCOF1 PE=1 SV=1	3	11	11	2	10	9	8	10	8	8	10	9	8	10	8	8	2	2	2	2	2	2	9.7	9.7	1.6	152.1	1488	1488;1414;188	0	80.725	By MS/MS	By MS/MS	By MS/MS	By MS/MS	By MS/MS	By MS/MS	8.5	7.4	7	8.7	7.2	7.2
Q13442	Q13442	2	2	2	28 kDa heat- and acid-stable phosphoprotein	PDAP1	sp|Q13442|HAP28_HUMAN 28 kDa heat- and acid-stable phosphoprotein OS=Homo sapiens GN=PDAP1 PE=1 SV=1	1	2	2	2	2	2	2	2	2	2	2	2	2	2	2	2	2	2	2	2	2	2	10.5	10.5	10.5	20.63	181	181	0	13.554	By MS/MS	By MS/MS	By MS/MS	By MS/MS	By MS/MS	By MS/MS	10.5	10.5	10.5	10.5	10.5	10.5
Q14964;C9JB90;C9JU14;J3KR73;Q9NRW1;P20340;Q96DA2	Q14964;C9JB90;C9JU14;J3KR73;Q9NRW1;P20340;Q96DA2	2;1;1;1;1;1;1	2;1;1;1;1;1;1	2;1;1;1;1;1;1	Ras-related protein Rab-39A;Ras-related protein Rab-6B;Ras-related protein Rab-6A;Ras-related protein Rab-39B	RAB39A;RAB6B;RAB6A;RAB39B	sp|Q14964|RB39A_HUMAN Ras-related protein Rab-39A OS=Homo sapiens GN=RAB39A PE=1 SV=2;tr|C9JB90|C9JB90_HUMAN Ras-related protein Rab-6B (Fragment) OS=Homo sapiens GN=RAB6B PE=4 SV=1;tr|C9JU14|C9JU14_HUMAN Ras-related protein Rab-6B (Fragment) OS=Homo sapie	7	2	2	2	1	1	2	2	2	1	1	1	2	2	2	1	1	1	2	2	2	1	10.1	10.1	10.1	25.006	217	217;49;83;124;208;208;213	0	12.18	By MS/MS	By MS/MS	By MS/MS	By MS/MS	By MS/MS	By MS/MS	5.1	5.1	10.1	10.1	10.1	5.1
Q14974;J3QR48;J3KTM9	Q14974;J3QR48;J3KTM9	2;1;1	2;1;1	2;1;1	Importin subunit beta-1	KPNB1	sp|Q14974|IMB1_HUMAN Importin subunit beta-1 OS=Homo sapiens GN=KPNB1 PE=1 SV=2;tr|J3QR48|J3QR48_HUMAN Importin subunit beta-1 (Fragment) OS=Homo sapiens GN=KPNB1 PE=1 SV=7;tr|J3KTM9|J3KTM9_HUMAN Importin subunit beta-1 (Fragment) OS=Homo sapiens GN=KPNB1	3	2	2	2	1	1	1	2	2	2	1	1	1	2	2	2	1	1	1	2	2	2	3.1	3.1	3.1	97.169	876	876;149;690	0	13.602	By matching	By matching	By matching	By MS/MS	By MS/MS	By MS/MS	1.7	1.7	1.7	3.1	3.1	3.1
Q15046;H3BRC9	Q15046;H3BRC9	2;1	2;1	2;1	Lysine--tRNA ligase	KARS	sp|Q15046|SYK_HUMAN Lysine--tRNA ligase OS=Homo sapiens GN=KARS PE=1 SV=3;tr|H3BRC9|H3BRC9_HUMAN Lysine--tRNA ligase OS=Homo sapiens GN=KARS PE=1 SV=1	2	2	2	2	0	1	1	2	2	2	0	1	1	2	2	2	0	1	1	2	2	2	3.9	3.9	3.9	68.047	597	597;76	0	12.702		By matching	By MS/MS	By MS/MS	By MS/MS	By MS/MS	0	1.5	1.5	3.9	3.9	3.9
Q15428;K7EMT0	Q15428;K7EMT0	2;1	2;1	2;1	Splicing factor 3A subunit 2	SF3A2	sp|Q15428|SF3A2_HUMAN Splicing factor 3A subunit 2 OS=Homo sapiens GN=SF3A2 PE=1 SV=2;tr|K7EMT0|K7EMT0_HUMAN Splicing factor 3A subunit 2 (Fragment) OS=Homo sapiens GN=SF3A2 PE=1 SV=2	2	2	2	2	0	1	1	2	1	0	0	1	1	2	1	0	0	1	1	2	1	0	4.3	4.3	4.3	49.255	464	464;135	0	12.699		By matching	By matching	By MS/MS	By MS/MS		0	2.2	2.2	4.3	2.2	0
Q15717;M0QZR9	Q15717;M0QZR9	2;1	2;1	2;1	ELAV-like protein 1	ELAVL1	sp|Q15717|ELAV1_HUMAN ELAV-like protein 1 OS=Homo sapiens GN=ELAVL1 PE=1 SV=2;tr|M0QZR9|M0QZR9_HUMAN ELAV-like protein 1 OS=Homo sapiens GN=ELAVL1 PE=1 SV=1	2	2	2	2	0	0	2	2	2	2	0	0	2	2	2	2	0	0	2	2	2	2	7.4	7.4	7.4	36.091	326	326;153	0	14.577			By MS/MS	By MS/MS	By MS/MS	By MS/MS	0	0	7.4	7.4	7.4	7.4
Q15836;K7ENK9;K7EKX0;J3QRU4;F8WCA0;L7N2F9;P63027	Q15836;K7ENK9;K7EKX0;J3QRU4;F8WCA0;L7N2F9;P63027	2;1;1;1;1;1;1	2;1;1;1;1;1;1	2;1;1;1;1;1;1	Vesicle-associated membrane protein 3;Vesicle-associated membrane protein 2	VAMP3;VAMP2	sp|Q15836|VAMP3_HUMAN Vesicle-associated membrane protein 3 OS=Homo sapiens GN=VAMP3 PE=1 SV=3;tr|K7ENK9|K7ENK9_HUMAN Vesicle-associated membrane protein 2 OS=Homo sapiens GN=VAMP2 PE=4 SV=1;tr|K7EKX0|K7EKX0_HUMAN Vesicle-associated membrane protein 3 OS=H	7	2	2	2	1	1	1	2	2	2	1	1	1	2	2	2	1	1	1	2	2	2	33	33	33	11.309	100	100;68;72;113;118;121;116	0	11.808	By matching	By matching	By matching	By MS/MS	By matching	By matching	17	16	16	33	33	33
Q16658	Q16658	2	2	2	Fascin	FSCN1	sp|Q16658|FSCN1_HUMAN Fascin OS=Homo sapiens GN=FSCN1 PE=1 SV=3	1	2	2	2	0	0	0	2	2	2	0	0	0	2	2	2	0	0	0	2	2	2	5.9	5.9	5.9	54.529	493	493	0	14.061				By MS/MS	By MS/MS	By matching	0	0	0	5.9	5.9	5.9
Q3KQU3;H0YF21	Q3KQU3;H0YF21	2;1	2;1	2;1	MAP7 domain-containing protein 1	MAP7D1	sp|Q3KQU3|MA7D1_HUMAN MAP7 domain-containing protein 1 OS=Homo sapiens GN=MAP7D1 PE=1 SV=1;tr|H0YF21|H0YF21_HUMAN MAP7 domain-containing protein 1 (Fragment) OS=Homo sapiens GN=MAP7D1 PE=1 SV=1	2	2	2	2	2	2	2	2	2	2	2	2	2	2	2	2	2	2	2	2	2	2	2.7	2.7	2.7	92.819	841	841;248	0	12.921	By MS/MS	By MS/MS	By MS/MS	By MS/MS	By MS/MS	By MS/MS	2.7	2.7	2.7	2.7	2.7	2.7
Q9Y6H1;Q5T1J5	Q9Y6H1;Q5T1J5	2;2	2;2	2;2	Coiled-coil-helix-coiled-coil-helix domain-containing protein 2;Putative coiled-coil-helix-coiled-coil-helix domain-containing protein CHCHD2P9, mitochondrial	CHCHD2;CHCHD2P9	sp|Q9Y6H1|CHCH2_HUMAN Coiled-coil-helix-coiled-coil-helix domain-containing protein 2 OS=Homo sapiens GN=CHCHD2 PE=1 SV=1;sp|Q5T1J5|CHCH9_HUMAN Putative coiled-coil-helix-coiled-coil-helix domain-containing protein CHCHD2P9, mitochondrial OS=Homo sapiens G	2	2	2	2	0	1	1	2	2	1	0	1	1	2	2	1	0	1	1	2	2	1	27.2	27.2	27.2	15.512	151	151;151	0	15.405		By matching	By matching	By MS/MS	By MS/MS	By MS/MS	0	8.6	8.6	27.2	27.2	18.5
Q5T9A4;H0Y2W2;Q5T2N8	Q5T9A4;H0Y2W2	4;3;1	4;3;1	2;1;0	ATPase family AAA domain-containing protein 3B	ATAD3B;ATAD3A	sp|Q5T9A4|ATD3B_HUMAN ATPase family AAA domain-containing protein 3B OS=Homo sapiens GN=ATAD3B PE=1 SV=1;tr|H0Y2W2|H0Y2W2_HUMAN ATPase family AAA domain-containing protein 3A (Fragment) OS=Homo sapiens GN=ATAD3A PE=1 SV=1	3	4	4	2	3	2	2	2	3	1	3	2	2	2	3	1	1	1	1	1	2	1	7.9	7.9	3.2	72.572	648	648;572;411	0	27.244	By MS/MS	By matching	By matching	By MS/MS	By MS/MS	By matching	6.3	4.5	4.5	3.2	4.9	1.7
Q6FI81;H3BTZ8;H3BV90	Q6FI81;H3BTZ8;H3BV90	2;1;1	2;1;1	2;1;1	Anamorsin	CIAPIN1	sp|Q6FI81|CPIN1_HUMAN Anamorsin OS=Homo sapiens GN=CIAPIN1 PE=1 SV=2;tr|H3BTZ8|H3BTZ8_HUMAN Anamorsin (Fragment) OS=Homo sapiens GN=CIAPIN1 PE=1 SV=1;tr|H3BV90|H3BV90_HUMAN Fe-S cluster assembly protein DRE2 OS=Homo sapiens GN=CIAPIN1 PE=1 SV=1	3	2	2	2	1	1	1	2	2	2	1	1	1	2	2	2	1	1	1	2	2	2	7.4	7.4	7.4	33.582	312	312;72;246	0	12.447	By MS/MS	By MS/MS	By MS/MS	By MS/MS	By MS/MS	By matching	3.5	3.5	3.5	7.4	7.4	7.4
Q7L0Y3;C9JVB6	Q7L0Y3;C9JVB6	2;1	2;1	2;1	Mitochondrial ribonuclease P protein 1	TRMT10C	sp|Q7L0Y3|MRRP1_HUMAN Mitochondrial ribonuclease P protein 1 OS=Homo sapiens GN=TRMT10C PE=1 SV=2;tr|C9JVB6|C9JVB6_HUMAN Mitochondrial ribonuclease P protein 1 (Fragment) OS=Homo sapiens GN=TRMT10C PE=1 SV=1	2	2	2	2	0	0	1	2	2	2	0	0	1	2	2	2	0	0	1	2	2	2	6.2	6.2	6.2	47.346	403	403;312	0	12.532			By matching	By matching	By MS/MS	By MS/MS	0	0	3.7	6.2	6.2	6.2
Q9H8S9;Q7L9L4;D6RCK3	Q9H8S9;Q7L9L4;D6RCK3	2;2;1	2;2;1	2;2;1	MOB kinase activator 1A;MOB kinase activator 1B	MOB1A;MOB1B	sp|Q9H8S9|MOB1A_HUMAN MOB kinase activator 1A OS=Homo sapiens GN=MOB1A PE=1 SV=4;sp|Q7L9L4|MOB1B_HUMAN MOB kinase activator 1B OS=Homo sapiens GN=MOB1B PE=1 SV=3;tr|D6RCK3|D6RCK3_HUMAN MOB kinase activator 1B (Fragment) OS=Homo sapiens GN=MOB1B PE=4 SV=1	3	2	2	2	2	1	0	2	2	2	2	1	0	2	2	2	2	1	0	2	2	2	10.6	10.6	10.6	25.079	216	216;216;130	0.0014085	10.864	By matching	By matching		By MS/MS	By matching	By matching	10.6	5.1	0	10.6	10.6	10.6
Q7RTV0	Q7RTV0	2	2	2	PHD finger-like domain-containing protein 5A	PHF5A	sp|Q7RTV0|PHF5A_HUMAN PHD finger-like domain-containing protein 5A OS=Homo sapiens GN=PHF5A PE=1 SV=1	1	2	2	2	2	2	2	2	2	2	2	2	2	2	2	2	2	2	2	2	2	2	26.4	26.4	26.4	12.405	110	110	0	15.256	By matching	By matching	By matching	By MS/MS	By matching	By MS/MS	26.4	26.4	26.4	26.4	26.4	26.4
Q86UP2;H0YJV5;G3V4Y7	Q86UP2;H0YJV5;G3V4Y7	2;1;1	2;1;1	2;1;1	Kinectin	KTN1	sp|Q86UP2|KTN1_HUMAN Kinectin OS=Homo sapiens GN=KTN1 PE=1 SV=1;tr|H0YJV5|H0YJV5_HUMAN Kinectin (Fragment) OS=Homo sapiens GN=KTN1 PE=1 SV=1;tr|G3V4Y7|G3V4Y7_HUMAN Kinectin OS=Homo sapiens GN=KTN1 PE=1 SV=1	3	2	2	2	1	1	1	1	2	1	1	1	1	1	2	1	1	1	1	1	2	1	1.8	1.8	1.8	156.27	1357	1357;91;595	0	12.803	By matching	By matching	By MS/MS	By MS/MS	By MS/MS	By MS/MS	1	1	1	1	1.8	1
S4R3V8;Q86X29	S4R3V8;Q86X29	2;2	2;2	2;2	Lipolysis-stimulated lipoprotein receptor	LSR	tr|S4R3V8|S4R3V8_HUMAN Lipolysis-stimulated lipoprotein receptor OS=Homo sapiens GN=LSR PE=1 SV=2;sp|Q86X29|LSR_HUMAN Lipolysis-stimulated lipoprotein receptor OS=Homo sapiens GN=LSR PE=1 SV=4	2	2	2	2	1	1	1	2	2	1	1	1	1	2	2	1	1	1	1	2	2	1	4.3	4.3	4.3	66.175	601	601;649	0	11.275	By matching	By matching	By matching	By matching	By MS/MS	By matching	1.8	1.8	1.8	4.3	4.3	1.8
Q8IZ21;A0A0J9YVR0	Q8IZ21;A0A0J9YVR0	2;1	2;1	2;1	Phosphatase and actin regulator 4	PHACTR4	sp|Q8IZ21|PHAR4_HUMAN Phosphatase and actin regulator 4 OS=Homo sapiens GN=PHACTR4 PE=1 SV=1;tr|A0A0J9YVR0|A0A0J9YVR0_HUMAN Phosphatase and actin regulator (Fragment) OS=Homo sapiens GN=PHACTR4 PE=1 SV=1	2	2	2	2	1	1	2	2	2	2	1	1	2	2	2	2	1	1	2	2	2	2	3.7	3.7	3.7	78.21	702	702;221	0	15.026	By MS/MS	By MS/MS	By MS/MS	By MS/MS	By MS/MS	By MS/MS	1.9	1.9	3.7	3.7	3.7	3.7
Q8N3F8;H0Y6J8	Q8N3F8;H0Y6J8	2;1	2;1	2;1	MICAL-like protein 1	MICALL1	sp|Q8N3F8|MILK1_HUMAN MICAL-like protein 1 OS=Homo sapiens GN=MICALL1 PE=1 SV=2;tr|H0Y6J8|H0Y6J8_HUMAN MICAL-like protein 1 (Fragment) OS=Homo sapiens GN=MICALL1 PE=1 SV=1	2	2	2	2	1	1	2	2	2	2	1	1	2	2	2	2	1	1	2	2	2	2	3.1	3.1	3.1	93.44	863	863;370	0	12.871	By matching	By MS/MS	By MS/MS	By MS/MS	By MS/MS	By MS/MS	1.6	1.6	3.1	3.1	3.1	3.1
Q8NAF0	Q8NAF0	2	2	2	Zinc finger protein 579	ZNF579	sp|Q8NAF0|ZN579_HUMAN Zinc finger protein 579 OS=Homo sapiens GN=ZNF579 PE=1 SV=2	1	2	2	2	2	1	1	1	1	1	2	1	1	1	1	1	2	1	1	1	1	1	3.2	3.2	3.2	60.509	562	562	0	11.043	By MS/MS	By matching	By matching	By matching	By matching	By matching	3.2	1.8	1.8	1.4	1.4	1.4
Q8TA86;C9J6V2	Q8TA86;C9J6V2	2;1	2;1	2;1	Retinitis pigmentosa 9 protein	RP9	sp|Q8TA86|RP9_HUMAN Retinitis pigmentosa 9 protein OS=Homo sapiens GN=RP9 PE=1 SV=2;tr|C9J6V2|C9J6V2_HUMAN Retinitis pigmentosa 9 protein (Fragment) OS=Homo sapiens GN=RP9 PE=1 SV=1	2	2	2	2	2	1	1	2	1	1	2	1	1	2	1	1	2	1	1	2	1	1	8.1	8.1	8.1	26.106	221	221;166	0	11.482	By MS/MS	By matching	By matching	By MS/MS	By matching	By matching	8.1	4.1	4.1	8.1	4.1	4.1
Q8TAE8	Q8TAE8	2	2	2	Growth arrest and DNA damage-inducible proteins-interacting protein 1	GADD45GIP1	sp|Q8TAE8|G45IP_HUMAN Growth arrest and DNA damage-inducible proteins-interacting protein 1 OS=Homo sapiens GN=GADD45GIP1 PE=1 SV=1	1	2	2	2	0	0	1	2	2	1	0	0	1	2	2	1	0	0	1	2	2	1	10.8	10.8	10.8	25.384	222	222	0	12.019			By matching	By MS/MS	By matching	By matching	0	0	6.3	10.8	10.8	6.3
Q8TEA8	Q8TEA8	2	2	2	D-tyrosyl-tRNA(Tyr) deacylase 1	DTD1	sp|Q8TEA8|DTD1_HUMAN D-tyrosyl-tRNA(Tyr) deacylase 1 OS=Homo sapiens GN=DTD1 PE=1 SV=2	1	2	2	2	1	1	1	1	1	2	1	1	1	1	1	2	1	1	1	1	1	2	7.7	7.7	7.7	23.423	209	209	0	12.184	By matching	By matching	By matching	By matching	By MS/MS	By MS/MS	6.7	6.7	6.7	6.7	6.7	7.7
Q8WU90;F8WB26	Q8WU90;F8WB26	2;1	2;1	2;1	Zinc finger CCCH domain-containing protein 15	ZC3H15	sp|Q8WU90|ZC3HF_HUMAN Zinc finger CCCH domain-containing protein 15 OS=Homo sapiens GN=ZC3H15 PE=1 SV=1;tr|F8WB26|F8WB26_HUMAN Zinc finger CCCH domain-containing protein 15 OS=Homo sapiens GN=ZC3H15 PE=1 SV=1	2	2	2	2	1	2	2	2	2	2	1	2	2	2	2	2	1	2	2	2	2	2	5.9	5.9	5.9	48.602	426	426;105	0	12.466	By matching	By MS/MS	By MS/MS	By MS/MS	By MS/MS	By MS/MS	4	5.9	5.9	5.9	5.9	5.9
Q8WUQ7	Q8WUQ7	2	2	2	Cactin	CACTIN	sp|Q8WUQ7|CATIN_HUMAN Cactin OS=Homo sapiens GN=CACTIN PE=1 SV=3	1	2	2	2	2	2	1	2	2	1	2	2	1	2	2	1	2	2	1	2	2	1	3.2	3.2	3.2	88.701	758	758	0	13.78	By MS/MS	By MS/MS	By MS/MS	By MS/MS	By MS/MS	By MS/MS	3.2	3.2	2	3.2	3.2	2
Q8WW22;F5H170	Q8WW22;F5H170	2;1	2;1	2;1	DnaJ homolog subfamily A member 4	DNAJA4	sp|Q8WW22|DNJA4_HUMAN DnaJ homolog subfamily A member 4 OS=Homo sapiens GN=DNAJA4 PE=1 SV=1;tr|F5H170|F5H170_HUMAN DnaJ homolog subfamily A member 4 OS=Homo sapiens GN=DNAJA4 PE=1 SV=1	2	2	2	2	2	1	1	1	0	0	2	1	1	1	0	0	2	1	1	1	0	0	3	3	3	44.797	397	397;219	0	12.261	By MS/MS	By MS/MS	By MS/MS	By MS/MS			3	3	2	2	0	0
Q8WXF0;E5RFT0;E5RJS0	Q8WXF0	5;1;1	2;1;1	2;1;1	Serine/arginine-rich splicing factor 12	SRSF12	sp|Q8WXF0|SRS12_HUMAN Serine/arginine-rich splicing factor 12 OS=Homo sapiens GN=SRSF12 PE=2 SV=1	3	5	2	2	5	5	5	5	4	4	2	2	2	2	1	1	2	2	2	2	1	1	18.4	9.6	9.6	30.512	261	261;41;42	0	13.51	By MS/MS	By MS/MS	By matching	By MS/MS	By MS/MS	By MS/MS	18.4	18.4	18.4	18.4	13.8	13.8
Q96CX2	Q96CX2	2	2	2	BTB/POZ domain-containing protein KCTD12	KCTD12	sp|Q96CX2|KCD12_HUMAN BTB/POZ domain-containing protein KCTD12 OS=Homo sapiens GN=KCTD12 PE=1 SV=1	1	2	2	2	0	1	2	2	2	1	0	1	2	2	2	1	0	1	2	2	2	1	7.4	7.4	7.4	35.7	325	325	0	14.821		By matching	By matching	By MS/MS	By MS/MS	By matching	0	3.7	7.4	7.4	7.4	3.7
Q99543	Q99543	2	2	2	DnaJ homolog subfamily C member 2;DnaJ homolog subfamily C member 2, N-terminally processed	DNAJC2	sp|Q99543|DNJC2_HUMAN DnaJ homolog subfamily C member 2 OS=Homo sapiens GN=DNAJC2 PE=1 SV=4	1	2	2	2	2	2	2	2	2	1	2	2	2	2	2	1	2	2	2	2	2	1	3.9	3.9	3.9	71.996	621	621	0	11.708	By matching	By matching	By matching	By MS/MS	By MS/MS	By matching	3.9	3.9	3.9	3.9	3.9	2.6
Q99614;H0YB37	Q99614;H0YB37	2;1	2;1	2;1	Tetratricopeptide repeat protein 1	TTC1	sp|Q99614|TTC1_HUMAN Tetratricopeptide repeat protein 1 OS=Homo sapiens GN=TTC1 PE=1 SV=1;tr|H0YB37|H0YB37_HUMAN Tetratricopeptide repeat protein 1 (Fragment) OS=Homo sapiens GN=TTC1 PE=1 SV=1	2	2	2	2	1	1	1	2	2	2	1	1	1	2	2	2	1	1	1	2	2	2	7.2	7.2	7.2	33.526	292	292;163	0	12.486	By MS/MS	By matching	By MS/MS	By MS/MS	By MS/MS	By MS/MS	3.8	3.8	3.8	7.2	7.2	7.2
Q9BPX5	Q9BPX5	2	2	2	Actin-related protein 2/3 complex subunit 5-like protein	ARPC5L	sp|Q9BPX5|ARP5L_HUMAN Actin-related protein 2/3 complex subunit 5-like protein OS=Homo sapiens GN=ARPC5L PE=1 SV=1	1	2	2	2	1	0	1	1	1	1	1	0	1	1	1	1	1	0	1	1	1	1	13.7	13.7	13.7	16.941	153	153	0	11.971	By MS/MS		By matching	By MS/MS	By matching	By MS/MS	5.9	0	7.8	7.8	7.8	7.8
Q9BRP8	Q9BRP8	2	2	2	Partner of Y14 and mago	WIBG	sp|Q9BRP8|PYM1_HUMAN Partner of Y14 and mago OS=Homo sapiens GN=PYM1 PE=1 SV=1	1	2	2	2	1	2	2	2	2	2	1	2	2	2	2	2	1	2	2	2	2	2	13.7	13.7	13.7	22.655	204	204	0	11.214	By matching	By matching	By matching	By MS/MS	By MS/MS	By matching	8.3	13.7	13.7	13.7	13.7	13.7
Q9BVK6	Q9BVK6	2	2	2	Transmembrane emp24 domain-containing protein 9	TMED9	sp|Q9BVK6|TMED9_HUMAN Transmembrane emp24 domain-containing protein 9 OS=Homo sapiens GN=TMED9 PE=1 SV=2	1	2	2	2	1	1	2	2	2	2	1	1	2	2	2	2	1	1	2	2	2	2	13.2	13.2	13.2	27.277	235	235	0	12.402	By MS/MS	By MS/MS	By MS/MS	By MS/MS	By MS/MS	By MS/MS	8.5	8.5	13.2	13.2	13.2	13.2
Q9BZI7;A0A087WYC8	Q9BZI7;A0A087WYC8	2;1	2;1	2;1	Regulator of nonsense transcripts 3B	UPF3B	sp|Q9BZI7|REN3B_HUMAN Regulator of nonsense transcripts 3B OS=Homo sapiens GN=UPF3B PE=1 SV=1;tr|A0A087WYC8|A0A087WYC8_HUMAN Regulator of nonsense transcripts 3B OS=Homo sapiens GN=UPF3B PE=1 SV=1	2	2	2	2	2	2	1	2	2	2	2	2	1	2	2	2	2	2	1	2	2	2	4.3	4.3	4.3	57.761	483	483;217	0	12.05	By matching	By matching	By matching	By MS/MS	By MS/MS	By MS/MS	4.3	4.3	2.5	4.3	4.3	4.3
Q9H444	Q9H444	2	2	2	Charged multivesicular body protein 4b	CHMP4B	sp|Q9H444|CHM4B_HUMAN Charged multivesicular body protein 4b OS=Homo sapiens GN=CHMP4B PE=1 SV=1	1	2	2	2	2	2	2	2	2	2	2	2	2	2	2	2	2	2	2	2	2	2	11.2	11.2	11.2	24.95	224	224	0	14.113	By MS/MS	By matching	By MS/MS	By MS/MS	By MS/MS	By MS/MS	11.2	11.2	11.2	11.2	11.2	11.2
Q9H7E9	Q9H7E9	2	2	2	UPF0488 protein C8orf33	C8orf33	sp|Q9H7E9|CH033_HUMAN UPF0488 protein C8orf33 OS=Homo sapiens GN=C8orf33 PE=1 SV=1	1	2	2	2	1	2	0	2	2	1	1	2	0	2	2	1	1	2	0	2	2	1	17	17	17	24.992	229	229	0	17.113	By matching	By MS/MS		By matching	By MS/MS	By MS/MS	10	17	0	17	17	10
Q9HD33	Q9HD33	2	2	2	39S ribosomal protein L47, mitochondrial	MRPL47	sp|Q9HD33|RM47_HUMAN 39S ribosomal protein L47, mitochondrial OS=Homo sapiens GN=MRPL47 PE=1 SV=2	1	2	2	2	1	1	2	2	2	2	1	1	2	2	2	2	1	1	2	2	2	2	8.4	8.4	8.4	29.45	250	250	0	12.31	By matching	By matching	By matching	By matching	By MS/MS	By MS/MS	4.4	4.4	8.4	8.4	8.4	8.4
Q9NRN7	Q9NRN7	2	2	2	L-aminoadipate-semialdehyde dehydrogenase-phosphopantetheinyl transferase	AASDHPPT	sp|Q9NRN7|ADPPT_HUMAN L-aminoadipate-semialdehyde dehydrogenase-phosphopantetheinyl transferase OS=Homo sapiens GN=AASDHPPT PE=1 SV=2	1	2	2	2	1	2	2	2	2	1	1	2	2	2	2	1	1	2	2	2	2	1	6.5	6.5	6.5	35.776	309	309	0	11.952	By matching	By matching	By MS/MS	By MS/MS	By MS/MS	By matching	3.9	6.5	6.5	6.5	6.5	3.9
Q9P015;E5RHF4;E5RIZ4	Q9P015;E5RHF4;E5RIZ4	2;1;1	2;1;1	2;1;1	39S ribosomal protein L15, mitochondrial	MRPL15	sp|Q9P015|RM15_HUMAN 39S ribosomal protein L15, mitochondrial OS=Homo sapiens GN=MRPL15 PE=1 SV=1;tr|E5RHF4|E5RHF4_HUMAN 39S ribosomal protein L15, mitochondrial (Fragment) OS=Homo sapiens GN=MRPL15 PE=1 SV=1;tr|E5RIZ4|E5RIZ4_HUMAN 39S ribosomal protein L1	3	2	2	2	2	2	2	2	2	1	2	2	2	2	2	1	2	2	2	2	2	1	9.1	9.1	9.1	33.419	296	296;198;237	0	11.392	By matching	By matching	By matching	By MS/MS	By matching	By matching	9.1	9.1	9.1	9.1	9.1	4.4
Q9UG63;C9JHK9;C9JZV3	Q9UG63;C9JHK9;C9JZV3	2;1;1	2;1;1	2;1;1	ATP-binding cassette sub-family F member 2	ABCF2	sp|Q9UG63|ABCF2_HUMAN ATP-binding cassette sub-family F member 2 OS=Homo sapiens GN=ABCF2 PE=1 SV=2;tr|C9JHK9|C9JHK9_HUMAN ATP-binding cassette sub-family F member 2 (Fragment) OS=Homo sapiens GN=ABCF2 PE=1 SV=1;tr|C9JZV3|C9JZV3_HUMAN ATP-binding cassette	3	2	2	2	0	0	1	1	2	1	0	0	1	1	2	1	0	0	1	1	2	1	3.2	3.2	3.2	71.289	623	623;240;288	0	11.455			By matching	By MS/MS	By MS/MS	By matching	0	0	1.4	1.4	3.2	1.4
Q9UQE7	Q9UQE7	2	2	2	Structural maintenance of chromosomes protein 3	SMC3	sp|Q9UQE7|SMC3_HUMAN Structural maintenance of chromosomes protein 3 OS=Homo sapiens GN=SMC3 PE=1 SV=2	1	2	2	2	2	2	2	2	2	2	2	2	2	2	2	2	2	2	2	2	2	2	2	2	2	141.54	1217	1217	0	12.851	By matching	By matching	By matching	By MS/MS	By MS/MS	By MS/MS	2	2	2	2	2	2
Q9Y237;H0Y4T6;J3KMW3;H0Y8P6;H0Y610	Q9Y237;H0Y4T6;J3KMW3;H0Y8P6;H0Y610	2;1;1;1;1	2;1;1;1;1	2;1;1;1;1	Peptidyl-prolyl cis-trans isomerase NIMA-interacting 4	PIN4	sp|Q9Y237|PIN4_HUMAN Peptidyl-prolyl cis-trans isomerase NIMA-interacting 4 OS=Homo sapiens GN=PIN4 PE=1 SV=1;tr|H0Y4T6|H0Y4T6_HUMAN Peptidyl-prolyl cis-trans isomerase NIMA-interacting 4 (Fragment) OS=Homo sapiens GN=PIN4 PE=1 SV=1;tr|J3KMW3|J3KMW3_HUMAN	5	2	2	2	1	2	2	2	2	2	1	2	2	2	2	2	1	2	2	2	2	2	17.6	17.6	17.6	13.81	131	131;91;111;115;116	0	15.418	By matching	By matching	By MS/MS	By MS/MS	By MS/MS	By MS/MS	9.2	17.6	17.6	17.6	17.6	17.6
Q9Y295;F8WEE0	Q9Y295;F8WEE0	2;1	2;1	2;1	Developmentally-regulated GTP-binding protein 1	DRG1	sp|Q9Y295|DRG1_HUMAN Developmentally-regulated GTP-binding protein 1 OS=Homo sapiens GN=DRG1 PE=1 SV=1;tr|F8WEE0|F8WEE0_HUMAN Developmentally-regulated GTP-binding protein 1 OS=Homo sapiens GN=DRG1 PE=1 SV=1	2	2	2	2	1	1	1	2	2	2	1	1	1	2	2	2	1	1	1	2	2	2	5.7	5.7	5.7	40.542	367	367;63	0	15.061	By matching	By matching	By matching	By MS/MS	By MS/MS	By MS/MS	3	3	3	5.7	5.7	5.7
Q9Y2Z0	Q9Y2Z0	2	2	2	Suppressor of G2 allele of SKP1 homolog	SUGT1	sp|Q9Y2Z0|SGT1_HUMAN Protein SGT1 homolog OS=Homo sapiens GN=SUGT1 PE=1 SV=3	1	2	2	2	1	1	1	2	2	1	1	1	1	2	2	1	1	1	1	2	2	1	6.3	6.3	6.3	41.024	365	365	0	14.848	By MS/MS	By matching	By matching	By MS/MS	By MS/MS	By MS/MS	3.3	3.3	3.3	6.3	6.3	3.3
Q9Y5B9	Q9Y5B9	2	2	2	FACT complex subunit SPT16	SUPT16H	sp|Q9Y5B9|SP16H_HUMAN FACT complex subunit SPT16 OS=Homo sapiens GN=SUPT16H PE=1 SV=1	1	2	2	2	0	0	1	2	2	2	0	0	1	2	2	2	0	0	1	2	2	2	2.5	2.5	2.5	119.91	1047	1047	0	12.767			By matching	By MS/MS	By MS/MS	By matching	0	0	1.1	2.5	2.5	2.5
Q9Y5S9;A0A0J9YW13	Q9Y5S9;A0A0J9YW13	2;1	2;1	2;1	RNA-binding protein 8A	RBM8A	sp|Q9Y5S9|RBM8A_HUMAN RNA-binding protein 8A OS=Homo sapiens GN=RBM8A PE=1 SV=1;tr|A0A0J9YW13|A0A0J9YW13_HUMAN RNA-binding protein 8A (Fragment) OS=Homo sapiens GN=RBM8A PE=1 SV=1	2	2	2	2	2	2	1	1	1	1	2	2	1	1	1	1	2	2	1	1	1	1	20.1	20.1	20.1	19.889	174	174;106	0	12.483	By MS/MS	By matching	By matching	By MS/MS	By MS/MS	By matching	20.1	20.1	13.8	6.3	6.3	6.3
Q9Y696	Q9Y696	2	2	2	Chloride intracellular channel protein 4	CLIC4	sp|Q9Y696|CLIC4_HUMAN Chloride intracellular channel protein 4 OS=Homo sapiens GN=CLIC4 PE=1 SV=4	1	2	2	2	2	2	1	1	2	1	2	2	1	1	2	1	2	2	1	1	2	1	7.1	7.1	7.1	28.772	253	253	0	11.982	By MS/MS	By matching	By matching	By MS/MS	By matching	By matching	7.1	7.1	3.2	3.2	7.1	3.2
H3BT36;A0A024RA52;P25787	H3BT36;A0A024RA52;P25787	1;1;1	1;1;1	1;1;1	Proteasome subunit alpha type;Proteasome subunit alpha type-2	PSMA2	tr|H3BT36|H3BT36_HUMAN Uncharacterized protein OS=Homo sapiens PE=1 SV=1;tr|A0A024RA52|A0A024RA52_HUMAN Proteasome subunit alpha type OS=Homo sapiens GN=PSMA2 PE=1 SV=1;sp|P25787|PSA2_HUMAN Proteasome subunit alpha type-2 OS=Homo sapiens GN=PSMA2 PE=1 SV=2	3	1	1	1	1	1	1	1	1	1	1	1	1	1	1	1	1	1	1	1	1	1	29.2	29.2	29.2	5.0107	48	48;234;234	0.0013514	7.7734	By matching	By matching	By matching	By MS/MS	By MS/MS	By matching	29.2	29.2	29.2	29.2	29.2	29.2
A0A075B730;A0A087X1U6	A0A075B730;A0A087X1U6	8;8	6;6	1;1		EPPK1	tr|A0A075B730|A0A075B730_HUMAN Epiplakin OS=Homo sapiens GN=EPPK1 PE=1 SV=2;tr|A0A087X1U6|A0A087X1U6_HUMAN Epiplakin OS=Homo sapiens GN=EPPK1 PE=1 SV=1	2	8	6	1	7	6	6	2	4	0	5	5	5	2	4	0	0	0	1	0	0	0	10.7	7.7	0.6	553.12	5063	5063;5088	0	41.302	By MS/MS	By MS/MS	By MS/MS	By matching	By matching		10.2	9.8	8	2.1	4.8	0
A0A075B746;P82921	A0A075B746;P82921	1;1	1;1	1;1	28S ribosomal protein S21, mitochondrial	MRPS21	tr|A0A075B746|A0A075B746_HUMAN 28S ribosomal protein S21, mitochondrial OS=Homo sapiens GN=MRPS21 PE=1 SV=1;sp|P82921|RT21_HUMAN 28S ribosomal protein S21, mitochondrial OS=Homo sapiens GN=MRPS21 PE=1 SV=2	2	1	1	1	0	1	1	1	1	0	0	1	1	1	1	0	0	1	1	1	1	0	16.1	16.1	16.1	10.688	87	87;87	0.0025221	6.8979		By matching	By matching	By MS/MS	By MS/MS		0	16.1	16.1	16.1	16.1	0
A0A087WUK2;O14979	A0A087WUK2;O14979	2;2	1;1	1;1	Heterogeneous nuclear ribonucleoprotein D-like	HNRNPDL	tr|A0A087WUK2|A0A087WUK2_HUMAN Heterogeneous nuclear ribonucleoprotein D-like OS=Homo sapiens GN=HNRNPDL PE=1 SV=1;sp|O14979|HNRDL_HUMAN Heterogeneous nuclear ribonucleoprotein D-like OS=Homo sapiens GN=HNRNPDL PE=1 SV=3	2	2	1	1	0	0	1	2	2	1	0	0	0	1	1	1	0	0	0	1	1	1	7.2	4.4	4.4	40.04	363	363;420	0.0012706	7.0523			By matching	By MS/MS	By matching	By matching	0	0	2.8	7.2	7.2	4.4
H0YJI1;A0A087WUN7;H0YJ40;G3V4X6;G3V2S9;Q9GZT3	H0YJI1;A0A087WUN7;H0YJ40;G3V4X6;G3V2S9;Q9GZT3	1;1;1;1;1;1	1;1;1;1;1;1	1;1;1;1;1;1	SRA stem-loop-interacting RNA-binding protein, mitochondrial	SLIRP	tr|H0YJI1|H0YJI1_HUMAN SRA stem-loop-interacting RNA-binding protein, mitochondrial (Fragment) OS=Homo sapiens GN=SLIRP PE=1 SV=1;tr|A0A087WUN7|A0A087WUN7_HUMAN SRA stem-loop-interacting RNA-binding protein, mitochondrial OS=Homo sapiens GN=SLIRP PE=1 SV=1	6	1	1	1	1	1	1	1	1	1	1	1	1	1	1	1	1	1	1	1	1	1	25	25	25	4.1678	40	40;92;96;98;124;109	0.0013908	8.9442	By MS/MS	By MS/MS	By MS/MS	By MS/MS	By MS/MS	By MS/MS	25	25	25	25	25	25
H0Y8D1;A6XMV8;Q5NV56;CON__P07477;A0A0J9YYC8;A0A087WW55;A0A0J9YW57;E7EQ64;A6XMV9;A0A0J9YXX4;Q8NHM4;P07478;P07477	H0Y8D1;A6XMV8;Q5NV56;CON__P07477;A0A0J9YYC8;A0A087WW55;A0A0J9YW57;E7EQ64;A6XMV9;A0A0J9YXX4;Q8NHM4;P07478;P07477	1;1;1;1;1;1;1;1;1;1;1;1;1	1;1;1;1;1;1;1;1;1;1;1;1;1	1;1;1;1;1;1;1;1;1;1;1;1;1	Putative trypsin-6;Trypsin-2;Trypsin-1;Alpha-trypsin chain 1;Alpha-trypsin chain 2	PRSS1;TRY8;PRSS3P2;PRSS2	tr|H0Y8D1|H0Y8D1_HUMAN Trypsin-1 (Fragment) OS=Homo sapiens GN=PRSS1 PE=1 SV=1;tr|A6XMV8|A6XMV8_HUMAN Protease serine 2 preproprotein OS=Homo sapiens GN=PRSS2 PE=1 SV=1;tr|Q5NV56|Q5NV56_HUMAN Anionic trypsinogen OS=Homo sapiens GN=TRY8 PE=1 SV=1;;tr|A0A0J9	13	1	1	1	1	1	1	1	1	1	1	1	1	1	1	1	1	1	1	1	1	1	14.1	14.1	14.1	15.421	142	142;246;247;247;247;247;249;261;261;261;247;247;247	0	28.624	By MS/MS	By MS/MS	By MS/MS	By MS/MS	By MS/MS	By MS/MS	14.1	14.1	14.1	14.1	14.1	14.1
H7C0K6;F8W8V9;A0A087WWA3;Q4R9M9;O43896;Q12756;O60333	H7C0K6;F8W8V9;A0A087WWA3;Q4R9M9;O43896;Q12756;O60333	1;1;1;1;1;1;1	1;1;1;1;1;1;1	1;1;1;1;1;1;1	Kinesin-like protein;Kinesin-like protein KIF1C;Kinesin-like protein KIF1A;Kinesin-like protein KIF1B	KIF1A;KIF1B;KIF1Bbeta;KIF1C	tr|H7C0K6|H7C0K6_HUMAN Kinesin-like protein (Fragment) OS=Homo sapiens GN=KIF1A PE=1 SV=1;tr|F8W8V9|F8W8V9_HUMAN Kinesin-like protein KIF1A (Fragment) OS=Homo sapiens GN=KIF1A PE=1 SV=1;tr|A0A087WWA3|A0A087WWA3_HUMAN Kinesin-like protein KIF1B OS=Homo sapi	7	1	1	1	1	1	1	1	1	1	1	1	1	1	1	1	1	1	1	1	1	1	5.7	5.7	5.7	24.756	227	227;1471;1797;1809;1103;1690;1816	0.0037406	6.8023	By matching	By matching	By matching	By MS/MS	By MS/MS	By matching	5.7	5.7	5.7	5.7	5.7	5.7
A0A087WX29;Q13148	A0A087WX29;Q13148	1;1	1;1	1;1	TAR DNA-binding protein 43	TARDBP	tr|A0A087WX29|A0A087WX29_HUMAN TAR DNA-binding protein 43 (Fragment) OS=Homo sapiens GN=TARDBP PE=1 SV=1;sp|Q13148|TADBP_HUMAN TAR DNA-binding protein 43 OS=Homo sapiens GN=TARDBP PE=1 SV=1	2	1	1	1	0	0	1	1	1	1	0	0	1	1	1	1	0	0	1	1	1	1	7.4	7.4	7.4	26.743	243	243;414	0.0048019	6.5784			By matching	By MS/MS	By MS/MS	By MS/MS	0	0	7.4	7.4	7.4	7.4
A0A087WXY1;Q9P2J5	A0A087WXY1;Q9P2J5	1;1	1;1	1;1	Leucine--tRNA ligase, cytoplasmic	LARS	tr|A0A087WXY1|A0A087WXY1_HUMAN Leucine--tRNA ligase, cytoplasmic OS=Homo sapiens GN=LARS PE=1 SV=1;sp|Q9P2J5|SYLC_HUMAN Leucine--tRNA ligase, cytoplasmic OS=Homo sapiens GN=LARS PE=1 SV=2	2	1	1	1	1	1	1	1	1	1	1	1	1	1	1	1	1	1	1	1	1	1	6.9	6.9	6.9	18.204	160	160;1176	0.0013245	7.557	By MS/MS	By MS/MS	By MS/MS	By MS/MS	By MS/MS	By matching	6.9	6.9	6.9	6.9	6.9	6.9
A0A087WY55;Q9NP79	A0A087WY55;Q9NP79	1;1	1;1	1;1	Vacuolar protein sorting-associated protein VTA1 homolog	VTA1	tr|A0A087WY55|A0A087WY55_HUMAN Chromosome 6 open reading frame 55, isoform CRA_b OS=Homo sapiens GN=VTA1 PE=1 SV=1;sp|Q9NP79|VTA1_HUMAN Vacuolar protein sorting-associated protein VTA1 homolog OS=Homo sapiens GN=VTA1 PE=1 SV=1	2	1	1	1	1	1	1	0	0	1	1	1	1	0	0	1	1	1	1	0	0	1	5	5	5	31.102	280	280;307	0.0013316	7.5842	By matching	By matching	By matching			By MS/MS	5	5	5	0	0	5
E9PLA9;G3V153;A0A087X082;Q14444	E9PLA9;G3V153;A0A087X082;Q14444	1;1;1;1	1;1;1;1	1;1;1;1	Caprin-1	CAPRIN1	tr|E9PLA9|E9PLA9_HUMAN Caprin-1 (Fragment) OS=Homo sapiens GN=CAPRIN1 PE=1 SV=1;tr|G3V153|G3V153_HUMAN Caprin-1 OS=Homo sapiens GN=CAPRIN1 PE=1 SV=1;tr|A0A087X082|A0A087X082_HUMAN Caprin-1 OS=Homo sapiens GN=CAPRIN1 PE=1 SV=1;sp|Q14444|CAPR1_HUMAN Caprin-1	4	1	1	1	1	1	1	1	1	1	1	1	1	1	1	1	1	1	1	1	1	1	6.5	6.5	6.5	20.236	186	186;628;649;709	0.001368	7.8435	By matching	By matching	By MS/MS	By MS/MS	By MS/MS	By MS/MS	6.5	6.5	6.5	6.5	6.5	6.5
M0R3F1;A0A0A0MRA5;B7Z4B8;Q9BUJ2	M0R3F1;A0A0A0MRA5;B7Z4B8;Q9BUJ2	1;1;1;1	1;1;1;1	1;1;1;1	Heterogeneous nuclear ribonucleoprotein U-like protein 1	HNRNPUL1	tr|M0R3F1|M0R3F1_HUMAN Heterogeneous nuclear ribonucleoprotein U-like protein 1 (Fragment) OS=Homo sapiens GN=HNRNPUL1 PE=1 SV=1;tr|A0A0A0MRA5|A0A0A0MRA5_HUMAN Heterogeneous nuclear ribonucleoprotein U-like protein 1 OS=Homo sapiens GN=HNRNPUL1 PE=1 SV=1;t	4	1	1	1	0	0	0	1	1	0	0	0	0	1	1	0	0	0	0	1	1	0	2.3	2.3	2.3	71.611	641	641;766;767;856	0.0049322	6.7111				By MS/MS	By MS/MS		0	0	0	2.3	2.3	0
A0A0A0MRR7;P09234	A0A0A0MRR7;P09234	1;1	1;1	1;1	U1 small nuclear ribonucleoprotein C	SNRPC	tr|A0A0A0MRR7|A0A0A0MRR7_HUMAN U1 small nuclear ribonucleoprotein C OS=Homo sapiens GN=SNRPC PE=1 SV=1;sp|P09234|RU1C_HUMAN U1 small nuclear ribonucleoprotein C OS=Homo sapiens GN=SNRPC PE=1 SV=1	2	1	1	1	0	0	1	1	1	0	0	0	1	1	1	0	0	0	1	1	1	0	10	10	10	19.687	180	180;159	0.0025157	6.889			By matching	By MS/MS	By MS/MS		0	0	10	10	10	0
A0A0A0MSN6	A0A0A0MSN6	1	1	1		AFTPH	tr|A0A0A0MSN6|A0A0A0MSN6_HUMAN Aftiphilin OS=Homo sapiens GN=AFTPH PE=1 SV=1	1	1	1	1	1	1	1	1	1	1	1	1	1	1	1	1	1	1	1	1	1	1	11.6	11.6	11.6	14.993	138	138	0.0025349	6.941	By MS/MS	By matching	By matching	By MS/MS	By MS/MS	By matching	11.6	11.6	11.6	11.6	11.6	11.6
J3KR24;A0A0A0MSX9;P41252	J3KR24;A0A0A0MSX9;P41252	1;1;1	1;1;1	1;1;1	Isoleucine--tRNA ligase, cytoplasmic	IARS	tr|J3KR24|J3KR24_HUMAN Isoleucine--tRNA ligase, cytoplasmic OS=Homo sapiens GN=IARS PE=1 SV=1;tr|A0A0A0MSX9|A0A0A0MSX9_HUMAN Isoleucine--tRNA ligase, cytoplasmic OS=Homo sapiens GN=IARS PE=1 SV=1;sp|P41252|SYIC_HUMAN Isoleucine--tRNA ligase, cytoplasmic OS	3	1	1	1	1	0	1	1	1	1	1	0	1	1	1	1	1	0	1	1	1	1	1.4	1.4	1.4	131.76	1152	1152;1242;1262	0.0049689	6.7585	By matching		By matching	By MS/MS	By MS/MS	By matching	1.4	0	1.4	1.4	1.4	1.4
F8WDD7;H7C0A3;F8WCF6;A0A0A6YYG9;P59998	F8WDD7;H7C0A3;F8WCF6;A0A0A6YYG9;P59998	1;1;1;1;1	1;1;1;1;1	1;1;1;1;1	Actin-related protein 2/3 complex subunit 4	ARPC4;ARPC4-TTLL3	tr|F8WDD7|F8WDD7_HUMAN Actin-related protein 2/3 complex subunit 4 OS=Homo sapiens GN=ARPC4 PE=4 SV=1;tr|H7C0A3|H7C0A3_HUMAN Protein ARPC4-TTLL3 (Fragment) OS=Homo sapiens GN=ARPC4-TTLL3 PE=4 SV=1;tr|F8WCF6|F8WCF6_HUMAN Actin-related protein 2/3 complex su	5	1	1	1	0	1	0	1	1	0	0	1	0	1	1	0	0	1	0	1	1	0	9.7	9.7	9.7	13.057	113	113;167;181;625;168	0.0012887	7.2429		By matching		By MS/MS	By MS/MS		0	9.7	0	9.7	9.7	0
A0A0B4J220	A0A0B4J220	1	1	1		C11orf98	tr|A0A0B4J220|A0A0B4J220_HUMAN Chromosome 11 open reading frame 48, isoform CRA_c OS=Homo sapiens GN=C11orf98 PE=1 SV=1	1	1	1	1	1	1	1	1	1	1	1	1	1	1	1	1	1	1	1	1	1	1	10.6	10.6	10.6	14.234	123	123	0.0013831	8.3119	By matching	By matching	By matching	By MS/MS	By MS/MS	By matching	10.6	10.6	10.6	10.6	10.6	10.6
Q5W0H4;A0A0B4J2C3;P13693	Q5W0H4;A0A0B4J2C3;P13693	1;1;1	1;1;1	1;1;1	Translationally-controlled tumor protein	TPT1	tr|Q5W0H4|Q5W0H4_HUMAN Translationally-controlled tumor protein OS=Homo sapiens GN=TPT1 PE=1 SV=1;tr|A0A0B4J2C3|A0A0B4J2C3_HUMAN Translationally-controlled tumor protein OS=Homo sapiens GN=TPT1 PE=1 SV=1;sp|P13693|TCTP_HUMAN Translationally-controlled tumo	3	1	1	1	1	1	1	1	1	1	1	1	1	1	1	1	1	1	1	1	1	1	7.4	7.4	7.4	21.525	188	188;197;172	0.001385	8.3659	By MS/MS	By MS/MS	By MS/MS	By MS/MS	By MS/MS	By MS/MS	7.4	7.4	7.4	7.4	7.4	7.4
A0A0C4DG89;D6RJA6;H0Y9U3	A0A0C4DG89	58;23;3	1;0;0	1;0;0		DDX46	tr|A0A0C4DG89|A0A0C4DG89_HUMAN Probable ATP-dependent RNA helicase DDX46 OS=Homo sapiens GN=DDX46 PE=1 SV=1	3	58	1	1	57	56	56	56	56	53	1	1	1	1	1	1	1	1	1	1	1	1	51.6	1.9	1.9	117.46	1032	1032;471;70	1	-2	By matching	By MS/MS	By MS/MS	By matching	By matching	By matching	49.7	49	49.4	51.1	51.3	48.3
H0YA55;A0A0C4DGB6;CON__P02768-1;P02768;C9JKR2;D6RHD5;B7WNR0;A0A087WWT3	H0YA55;A0A0C4DGB6;CON__P02768-1;P02768;C9JKR2;D6RHD5;B7WNR0;A0A087WWT3	5;5;5;5;4;4;4;3	1;1;1;1;1;1;1;1	1;1;1;1;1;1;1;1	Serum albumin	ALB	tr|H0YA55|H0YA55_HUMAN Serum albumin (Fragment) OS=Homo sapiens GN=ALB PE=1 SV=1;tr|A0A0C4DGB6|A0A0C4DGB6_HUMAN Serum albumin OS=Homo sapiens GN=ALB PE=1 SV=1;;sp|P02768|ALBU_HUMAN Serum albumin OS=Homo sapiens GN=ALB PE=1 SV=2;tr|C9JKR2|C9JKR2_HUMAN Album	8	5	1	1	4	4	4	4	4	5	0	0	0	0	0	1	0	0	0	0	0	1	8.1	1.8	1.8	51.459	454	454;604;609;609;417;459;494;396	0.0048662	6.6618	By matching	By matching	By matching	By matching	By matching	By MS/MS	6.4	6.4	6.4	6.4	6.4	8.1
A0A0C4DGD2;E5RGM7;E5RK41;O95391	A0A0C4DGD2;E5RGM7;E5RK41;O95391	1;1;1;1	1;1;1;1	1;1;1;1	Pre-mRNA-splicing factor SLU7	SLU7	tr|A0A0C4DGD2|A0A0C4DGD2_HUMAN Pre-mRNA-splicing factor SLU7 (Fragment) OS=Homo sapiens GN=SLU7 PE=1 SV=1;tr|E5RGM7|E5RGM7_HUMAN Pre-mRNA-splicing factor SLU7 (Fragment) OS=Homo sapiens GN=SLU7 PE=1 SV=1;tr|E5RK41|E5RK41_HUMAN Pre-mRNA-splicing factor SLU7	4	1	1	1	1	1	1	0	1	1	1	1	1	0	1	1	1	1	1	0	1	1	16.8	16.8	16.8	11.587	101	101;124;143;586	0.0013459	7.7222	By matching	By matching	By matching		By matching	By MS/MS	16.8	16.8	16.8	0	16.8	16.8
A0A0C4DGH5;Q86VP6	A0A0C4DGH5;Q86VP6	1;1	1;1	1;1	Cullin-associated NEDD8-dissociated protein 1	CAND1	tr|A0A0C4DGH5|A0A0C4DGH5_HUMAN Cullin-associated NEDD8-dissociated protein 1 (Fragment) OS=Homo sapiens GN=CAND1 PE=1 SV=1;sp|Q86VP6|CAND1_HUMAN Cullin-associated NEDD8-dissociated protein 1 OS=Homo sapiens GN=CAND1 PE=1 SV=2	2	1	1	1	1	1	1	1	1	0	1	1	1	1	1	0	1	1	1	1	1	0	1.7	1.7	1.7	85.408	770	770;1230	0	11.923	By matching	By matching	By matching	By MS/MS	By MS/MS		1.7	1.7	1.7	1.7	1.7	0
Q4VY20;Q4VY19;A0A0J9YWE8;P31946;A0A0J9YWZ2;A2IDB2	Q4VY20;Q4VY19;A0A0J9YWE8;P31946;A0A0J9YWZ2	5;5;5;5;3;2	2;2;2;2;1;0	1;1;1;1;1;0	14-3-3 protein beta/alpha;14-3-3 protein beta/alpha, N-terminally processed	YWHAB	tr|Q4VY20|Q4VY20_HUMAN 14-3-3 protein beta/alpha (Fragment) OS=Homo sapiens GN=YWHAB PE=1 SV=1;tr|Q4VY19|Q4VY19_HUMAN 14-3-3 protein beta/alpha (Fragment) OS=Homo sapiens GN=YWHAB PE=1 SV=1;tr|A0A0J9YWE8|A0A0J9YWE8_HUMAN 14-3-3 protein beta/alpha OS=Homo s	6	5	2	1	5	4	5	5	4	5	2	2	2	2	2	2	1	1	1	1	1	1	59.5	31.1	18.9	8.4284	74	74;100;149;246;81;162	0	21.166	By MS/MS	By MS/MS	By MS/MS	By MS/MS	By MS/MS	By MS/MS	59.5	50	59.5	59.5	50	59.5
A6NC57	A6NC57	1	1	1	Ankyrin repeat domain-containing protein 62	ANKRD62	sp|A6NC57|ANR62_HUMAN Ankyrin repeat domain-containing protein 62 OS=Homo sapiens GN=ANKRD62 PE=2 SV=4	1	1	1	1	1	0	1	0	0	1	1	0	1	0	0	1	1	0	1	0	0	1	1.2	1.2	1.2	106.45	917	917	1	-2	By MS/MS		By MS/MS			By MS/MS	1.2	0	1.2	0	0	1.2
J3QQT6;J3KS55;A6NJA2;P54578	J3QQT6;J3KS55;A6NJA2;P54578	1;1;1;1	1;1;1;1	1;1;1;1	Ubiquitin carboxyl-terminal hydrolase;Ubiquitin carboxyl-terminal hydrolase 14	USP14	tr|J3QQT6|J3QQT6_HUMAN Ubiquitin carboxyl-terminal hydrolase 14 (Fragment) OS=Homo sapiens GN=USP14 PE=1 SV=1;tr|J3KS55|J3KS55_HUMAN Ubiquitin carboxyl-terminal hydrolase 14 (Fragment) OS=Homo sapiens GN=USP14 PE=1 SV=1;tr|A6NJA2|A6NJA2_HUMAN Ubiquitin car	4	1	1	1	0	0	0	1	1	0	0	0	0	1	1	0	0	0	0	1	1	0	65	65	65	2.2327	20	20;28;448;494	0.0013089	7.4008				By MS/MS	By matching		0	0	0	65	65	0
H0YNB8;H0YMD9;H0YKN4;H0YKV8;H0YKL9;H0YKZ7;H0YLV6;H0YMT9;H0YKX9;H0YMM1;H0YNP5;H0YKS4;H0YMD0;H0YMU9;H0YN42;P07355;A6NMY6	H0YNB8;H0YMD9;H0YKN4;H0YKV8;H0YKL9;H0YKZ7;H0YLV6;H0YMT9;H0YKX9;H0YMM1;H0YNP5;H0YKS4;H0YMD0;H0YMU9;H0YN42;P07355;A6NMY6	1;1;1;1;1;1;1;1;1;1;1;1;1;1;1;1;1	1;1;1;1;1;1;1;1;1;1;1;1;1;1;1;1;1	1;1;1;1;1;1;1;1;1;1;1;1;1;1;1;1;1	Annexin;Annexin A2;Putative annexin A2-like protein	ANXA2;ANXA2P2	tr|H0YNB8|H0YNB8_HUMAN Annexin A2 (Fragment) OS=Homo sapiens GN=ANXA2 PE=1 SV=1;tr|H0YMD9|H0YMD9_HUMAN Annexin A2 (Fragment) OS=Homo sapiens GN=ANXA2 PE=1 SV=1;tr|H0YKN4|H0YKN4_HUMAN Annexin A2 OS=Homo sapiens GN=ANXA2 PE=1 SV=1;tr|H0YKV8|H0YKV8_HUMAN Anne	17	1	1	1	0	0	0	1	1	1	0	0	0	1	1	1	0	0	0	1	1	1	19.1	19.1	19.1	5.1247	47	47;65;69;81;110;119;132;133;134;149;175;176;227;230;256;339;339	0.0048193	6.6017				By MS/MS	By MS/MS	By MS/MS	0	0	0	19.1	19.1	19.1
A8MUA9;A8MU27;Q6EEV6;P61956;P55854	A8MUA9;A8MU27;Q6EEV6;P61956;P55854	1;1;1;1;1	1;1;1;1;1	1;1;1;1;1	Small ubiquitin-related modifier 4;Small ubiquitin-related modifier 2;Small ubiquitin-related modifier 3	SUMO3;SUMO4;SUMO2	tr|A8MUA9|A8MUA9_HUMAN SMT3 suppressor of mif two 3 homolog 3 (Yeast), isoform CRA_d OS=Homo sapiens GN=SUMO3 PE=1 SV=1;tr|A8MU27|A8MU27_HUMAN Small ubiquitin-related modifier 3 OS=Homo sapiens GN=SUMO3 PE=1 SV=1;sp|Q6EEV6|SUMO4_HUMAN Small ubiquitin-relat	5	1	1	1	1	1	1	1	1	1	1	1	1	1	1	1	1	1	1	1	1	1	8.9	8.9	8.9	15.317	135	135;147;95;95;103	0.0013495	7.7605	By MS/MS	By MS/MS	By MS/MS	By MS/MS	By MS/MS	By MS/MS	8.9	8.9	8.9	8.9	8.9	8.9
E9PNW0;F8VRJ2;E9PJJ2;E9PS34;E9PNJ7;A8MXH2;F8VVB5;E9PKT8;H0YH88;C9J6D1;H0YHC3;F8W020;F8W118;F8VXI6;F8VUX1;F8VY35;C9JZI7;F8VV59;F8W543;B7Z9C2;F8W0J6;F5H4R6;H0YIV4;Q99733;P55209	E9PNW0;F8VRJ2;E9PJJ2;E9PS34;E9PNJ7;A8MXH2;F8VVB5;E9PKT8;H0YH88;C9J6D1;H0YHC3;F8W020;F8W118;F8VXI6;F8VUX1;F8VY35;C9JZI7;F8VV59;F8W543;B7Z9C2;F8W0J6;F5H4R6;H0YIV4;Q99733;P55209	1;1;1;1;1;1;1;1;1;1;1;1;1;1;1;1;1;1;1;1;1;1;1;1;1	1;1;1;1;1;1;1;1;1;1;1;1;1;1;1;1;1;1;1;1;1;1;1;1;1	1;1;1;1;1;1;1;1;1;1;1;1;1;1;1;1;1;1;1;1;1;1;1;1;1	Nucleosome assembly protein 1-like 4;Nucleosome assembly protein 1-like 1	NAP1L4;NAP1L1	tr|E9PNW0|E9PNW0_HUMAN Nucleosome assembly protein 1-like 4 (Fragment) OS=Homo sapiens GN=NAP1L4 PE=1 SV=1;tr|F8VRJ2|F8VRJ2_HUMAN Nucleosome assembly protein 1-like 1 (Fragment) OS=Homo sapiens GN=NAP1L1 PE=1 SV=1;tr|E9PJJ2|E9PJJ2_HUMAN Nucleosome assembly	25	1	1	1	1	1	1	1	1	1	1	1	1	1	1	1	1	1	1	1	1	1	9.3	9.3	9.3	12.25	107	107;114;128;133;140;156;161;169;177;178;198;207;209;215;237;264;278;327;328;349;379;383;385;375;391	0.0013123	7.4117	By matching	By MS/MS	By MS/MS	By MS/MS	By MS/MS	By matching	9.3	9.3	9.3	9.3	9.3	9.3
E9PLU9;E9PLQ9;E9PSE2;F5H7N4;E9PQE7;F8WEU6;E9PNZ1;E9PMR5;H0YF02;E9PKX9;H0YEA2;E9PJ72;J3QL64;J3QKL5;A8MZH3;H7BYR8	E9PLU9;E9PLQ9;E9PSE2;F5H7N4;E9PQE7;F8WEU6;E9PNZ1;E9PMR5;H0YF02;E9PKX9;H0YEA2;E9PJ72;J3QL64;J3QKL5;A8MZH3;H7BYR8	1;1;1;1;1;1;1;1;1;1;1;1;1;1;1;1	1;1;1;1;1;1;1;1;1;1;1;1;1;1;1;1	1;1;1;1;1;1;1;1;1;1;1;1;1;1;1;1		MBP	tr|E9PLU9|E9PLU9_HUMAN Myelin basic protein OS=Homo sapiens GN=MBP PE=1 SV=1;tr|E9PLQ9|E9PLQ9_HUMAN Myelin basic protein OS=Homo sapiens GN=MBP PE=1 SV=1;tr|E9PSE2|E9PSE2_HUMAN Myelin basic protein OS=Homo sapiens GN=MBP PE=1 SV=1;tr|F5H7N4|F5H7N4_HUMAN My	16	1	1	1	1	1	1	0	0	1	1	1	1	0	0	1	1	1	1	0	0	1	28.1	28.1	28.1	3.6241	32	32;59;64;66;68;73;86;98;108;108;119;149;157;171;181;236	0.0014006	9.544	By matching	By matching	By matching			By MS/MS	28.1	28.1	28.1	0	0	28.1
B0QY59;O00178	B0QY59;O00178	1;1	1;1	1;1	GTP-binding protein 1	GTPBP1	tr|B0QY59|B0QY59_HUMAN GTP-binding protein 1 (Fragment) OS=Homo sapiens GN=GTPBP1 PE=1 SV=1;sp|O00178|GTPB1_HUMAN GTP-binding protein 1 OS=Homo sapiens GN=GTPBP1 PE=1 SV=3	2	1	1	1	1	0	1	1	1	1	1	0	1	1	1	1	1	0	1	1	1	1	5.2	5.2	5.2	37.853	349	349;669	0.0048309	6.6181	By matching		By matching	By MS/MS	By MS/MS	By matching	5.2	0	5.2	5.2	5.2	5.2
B1AMS2;Q14141	B1AMS2;Q14141	1;1	1;1	1;1	Septin-6	2020-09-06	tr|B1AMS2|B1AMS2_HUMAN Septin 6, isoform CRA_b OS=Homo sapiens GN=SEPT6 PE=1 SV=1;sp|Q14141|SEPT6_HUMAN Septin-6 OS=Homo sapiens GN=SEPT6 PE=1 SV=4	2	1	1	1	0	0	0	0	1	1	0	0	0	0	1	1	0	0	0	0	1	1	4.9	4.9	4.9	49.303	431	431;434	0.001387	8.6494					By MS/MS	By MS/MS	0	0	0	0	4.9	4.9
B1AN99;P35030	B1AN99;P35030	1;1	1;1	1;1	Trypsin-3	PRSS3	tr|B1AN99|B1AN99_HUMAN Trypsin-3 (Fragment) OS=Homo sapiens GN=PRSS3 PE=1 SV=7;sp|P35030|TRY3_HUMAN Trypsin-3 OS=Homo sapiens GN=PRSS3 PE=1 SV=2	2	1	1	1	1	1	1	1	1	1	1	1	1	1	1	1	1	1	1	1	1	1	7.3	7.3	7.3	19.401	178	178;304	0	92.13	By MS/MS	By MS/MS	By MS/MS	By MS/MS	By MS/MS	By MS/MS	7.3	7.3	7.3	7.3	7.3	7.3
B3KVL5;Q8TBK6	B3KVL5;Q8TBK6	1;1	1;1	1;1	Zinc finger CCHC domain-containing protein 10	ZCCHC10	tr|B3KVL5|B3KVL5_HUMAN Zinc finger CCHC domain-containing protein 10 OS=Homo sapiens GN=ZCCHC10 PE=1 SV=1;sp|Q8TBK6|ZCH10_HUMAN Zinc finger CCHC domain-containing protein 10 OS=Homo sapiens GN=ZCCHC10 PE=1 SV=1	2	1	1	1	1	1	1	1	1	1	1	1	1	1	1	1	1	1	1	1	1	1	7.5	7.5	7.5	20.308	186	186;192	0.0013755	8.2732	By MS/MS	By MS/MS	By MS/MS	By MS/MS	By MS/MS	By MS/MS	7.5	7.5	7.5	7.5	7.5	7.5
H7C0B6;B4DV78;P09327	H7C0B6;B4DV78;P09327	1;1;1	1;1;1	1;1;1	Villin-1	VIL1	tr|H7C0B6|H7C0B6_HUMAN Villin-1 (Fragment) OS=Homo sapiens GN=VIL1 PE=1 SV=1;tr|B4DV78|B4DV78_HUMAN Villin-1 OS=Homo sapiens GN=VIL1 PE=1 SV=1;sp|P09327|VILI_HUMAN Villin-1 OS=Homo sapiens GN=VIL1 PE=1 SV=4	3	1	1	1	0	0	0	0	0	1	0	0	0	0	0	1	0	0	0	0	0	1	6.1	6.1	6.1	23.358	213	213;516;827	0.0070922	6.4792						By MS/MS	0	0	0	0	0	6.1
Q8NBY1;B4E0Y9;Q9P289	Q8NBY1;B4E0Y9;Q9P289	1;1;1	1;1;1	1;1;1	Serine/threonine-protein kinase 26	STK26	tr|Q8NBY1|Q8NBY1_HUMAN Serine/threonine-protein kinase 26 OS=Homo sapiens GN=STK26 PE=1 SV=1;tr|B4E0Y9|B4E0Y9_HUMAN Serine/threonine-protein kinase 26 OS=Homo sapiens GN=STK26 PE=1 SV=1;sp|Q9P289|STK26_HUMAN Serine/threonine-protein kinase 26 OS=Homo sapie	3	1	1	1	1	0	1	1	1	0	1	0	1	1	1	0	1	0	1	1	1	0	3.8	3.8	3.8	43.867	392	392;438;416	0.0048368	6.6207	By matching		By matching	By MS/MS	By MS/MS		3.8	0	3.8	3.8	3.8	0
E7ENZ3;B7ZAR1;E9PCA1;P48643	E7ENZ3;B7ZAR1;E9PCA1;P48643	1;1;1;1	1;1;1;1	1;1;1;1	T-complex protein 1 subunit epsilon	CCT5	tr|E7ENZ3|E7ENZ3_HUMAN T-complex protein 1 subunit epsilon OS=Homo sapiens GN=CCT5 PE=1 SV=1;tr|B7ZAR1|B7ZAR1_HUMAN T-complex protein 1 subunit epsilon OS=Homo sapiens GN=CCT5 PE=1 SV=1;tr|E9PCA1|E9PCA1_HUMAN T-complex protein 1 subunit epsilon OS=Homo sap	4	1	1	1	1	1	1	1	1	1	1	1	1	1	1	1	1	1	1	1	1	1	2.3	2.3	2.3	53.848	486	486;503;520;541	0.0012821	7.1939	By matching	By matching	By MS/MS	By MS/MS	By MS/MS	By MS/MS	2.3	2.3	2.3	2.3	2.3	2.3
B8ZZ08	B8ZZ08	2	1	1		LUC7L	tr|B8ZZ08|B8ZZ08_HUMAN LUC7-like (S. cerevisiae) (Fragment) OS=Homo sapiens GN=LUC7L PE=1 SV=1	1	2	1	1	1	1	1	1	1	2	0	0	0	0	0	1	0	0	0	0	0	1	11.2	7.1	7.1	20.709	170	170	0.0013661	7.8347	By matching	By matching	By matching	By matching	By matching	By MS/MS	4.1	4.1	4.1	4.1	4.1	11.2
B8ZZQ4;Q96EY7	B8ZZQ4;Q96EY7	1;1	1;1	1;1	Pentatricopeptide repeat domain-containing protein 3, mitochondrial	PTCD3	tr|B8ZZQ4|B8ZZQ4_HUMAN Pentatricopeptide repeat domain-containing protein 3, mitochondrial (Fragment) OS=Homo sapiens GN=PTCD3 PE=1 SV=3;sp|Q96EY7|PTCD3_HUMAN Pentatricopeptide repeat domain-containing protein 3, mitochondrial OS=Homo sapiens GN=PTCD3 PE=1	2	1	1	1	0	0	0	1	0	0	0	0	0	1	0	0	0	0	0	1	0	0	7	7	7	21.075	187	187;689	0.0013643	7.8323				By MS/MS			0	0	0	7	0	0
C9J712;C9J0J7;C9JQ45;G5E9Q6;P35080	C9J712;C9J0J7;C9JQ45;G5E9Q6;P35080	1;1;1;1;1	1;1;1;1;1	1;1;1;1;1	Profilin;Profilin-2	PFN2	tr|C9J712|C9J712_HUMAN Profilin OS=Homo sapiens GN=PFN2 PE=1 SV=1;tr|C9J0J7|C9J0J7_HUMAN Profilin OS=Homo sapiens GN=PFN2 PE=1 SV=1;tr|C9JQ45|C9JQ45_HUMAN Profilin OS=Homo sapiens GN=PFN2 PE=1 SV=1;tr|G5E9Q6|G5E9Q6_HUMAN Profilin OS=Homo sapiens GN=PFN2 PE	5	1	1	1	1	1	1	1	1	1	1	1	1	1	1	1	1	1	1	1	1	1	15.4	15.4	15.4	9.7982	91	91;91;110;188;140	0.0013441	7.6935	By matching	By matching	By matching	By MS/MS	By MS/MS	By matching	15.4	15.4	15.4	15.4	15.4	15.4
D6RBD7;C9J1V9;O43324	D6RBD7;C9J1V9;O43324	1;1;1	1;1;1	1;1;1	Eukaryotic translation elongation factor 1 epsilon-1	EEF1E1;EEF1E1-BLOC1S5	tr|D6RBD7|D6RBD7_HUMAN Eukaryotic translation elongation factor 1 epsilon-1 OS=Homo sapiens GN=EEF1E1 PE=4 SV=1;tr|C9J1V9|C9J1V9_HUMAN HCG2043275 OS=Homo sapiens GN=EEF1E1-BLOC1S5 PE=4 SV=2;sp|O43324|MCA3_HUMAN Eukaryotic translation elongation factor 1 ep	3	1	1	1	1	0	1	1	0	1	1	0	1	1	0	1	1	0	1	1	0	1	7.3	7.3	7.3	16.686	150	150;151;174	0.0025094	6.8678	By matching		By MS/MS	By MS/MS		By MS/MS	7.3	0	7.3	7.3	0	7.3
C9JI87;P21796	C9JI87;P21796	1;1	1;1	1;1	Voltage-dependent anion-selective channel protein 1	VDAC1	tr|C9JI87|C9JI87_HUMAN Voltage-dependent anion-selective channel protein 1 (Fragment) OS=Homo sapiens GN=VDAC1 PE=1 SV=5;sp|P21796|VDAC1_HUMAN Voltage-dependent anion-selective channel protein 1 OS=Homo sapiens GN=VDAC1 PE=1 SV=2	2	1	1	1	0	0	0	1	1	1	0	0	0	1	1	1	0	0	0	1	1	1	6	6	6	20.374	184	184;283	0.00375	6.8377				By MS/MS	By MS/MS	By matching	0	0	0	6	6	6
C9JL85;P58546	C9JL85;P58546	1;1	1;1	1;1	Myotrophin	MTPN	tr|C9JL85|C9JL85_HUMAN Myotrophin OS=Homo sapiens GN=MTPN PE=1 SV=1;sp|P58546|MTPN_HUMAN Myotrophin OS=Homo sapiens GN=MTPN PE=1 SV=2	2	1	1	1	1	1	1	1	1	1	1	1	1	1	1	1	1	1	1	1	1	1	32.7	32.7	32.7	5.7044	52	52;118	0.0013193	7.4873	By matching	By matching	By matching	By MS/MS	By MS/MS	By MS/MS	32.7	32.7	32.7	32.7	32.7	32.7
C9K0I0;Q9UJT2	C9K0I0;Q9UJT2	1;1	1;1	1;1	Testis-specific serine kinase substrate	TSKS	tr|C9K0I0|C9K0I0_HUMAN Testis-specific serine kinase substrate OS=Homo sapiens GN=TSKS PE=1 SV=1;sp|Q9UJT2|TSKS_HUMAN Testis-specific serine kinase substrate OS=Homo sapiens GN=TSKS PE=1 SV=3	2	1	1	1	1	1	0	0	1	0	1	1	0	0	1	0	1	1	0	0	1	0	3.6	3.6	3.6	43.099	392	392;592	0.0013605	7.8096	By MS/MS	By MS/MS			By MS/MS		3.6	3.6	0	0	3.6	0
CON__P02533;P02533;CON__A2A4G1;CON__Q9Z2K1;CON__P08779;CON__Q3ZAW8;P08779;CON__Q7Z3Y9;Q7Z3Y9	CON__P02533;P02533;CON__A2A4G1;CON__Q9Z2K1;CON__P08779;CON__Q3ZAW8;P08779	3;3;2;2;2;2;2;1;1	1;1;0;0;0;0;0;0;0	1;1;0;0;0;0;0;0;0	Keratin, type I cytoskeletal 14;Keratin, type I cytoskeletal 16	KRT14;KRT16	;sp|P02533|K1C14_HUMAN Keratin, type I cytoskeletal 14 OS=Homo sapiens GN=KRT14 PE=1 SV=4;;;;;sp|P08779|K1C16_HUMAN Keratin, type I cytoskeletal 16 OS=Homo sapiens GN=KRT16 PE=1 SV=4	9	3	1	1	1	2	2	3	3	3	0	0	0	1	1	1	0	0	0	1	1	1	6.6	3.2	3.2	51.621	472	472;472;456;469;473;474;473;468;468	0.0071429	6.518	By matching	By matching	By matching	By matching	By MS/MS	By matching	1.5	3.4	3.4	6.6	6.6	6.6
CON__P13647;P13647;F8VV57;F8VU69;H0YIN9;H0YI76	CON__P13647;P13647;F8VV57	4;4;2;1;1;1	1;1;1;0;0;0	1;1;1;0;0;0	Keratin, type II cytoskeletal 5	KRT5	;sp|P13647|K2C5_HUMAN Keratin, type II cytoskeletal 5 OS=Homo sapiens GN=KRT5 PE=1 SV=3;tr|F8VV57|F8VV57_HUMAN Keratin, type II cytoskeletal 5 (Fragment) OS=Homo sapiens GN=KRT5 PE=1 SV=1	6	4	1	1	2	3	2	3	3	2	1	1	1	1	1	1	1	1	1	1	1	1	7.6	1.9	1.9	62.378	590	590;590;132;147;196;201	0.0025063	6.8669	By matching	By MS/MS	By MS/MS	By MS/MS	By MS/MS	By MS/MS	3.6	5.9	3.6	5.3	5.9	3.6
CON__Q1RMN8	CON__Q1RMN8	1	1	1				1	1	1	1	1	1	0	0	0	0	1	1	0	0	0	0	1	1	0	0	0	0	6.4	6.4	6.4	24.536	234	234	0.0048721	6.6636	By MS/MS	By matching					6.4	6.4	0	0	0	0
Q5TCU3;CON__Q3SX28;Q5TCU8;P07951;U3KQK2	Q5TCU3;CON__Q3SX28;Q5TCU8;P07951	5;5;5;5;1	1;1;1;1;0	1;1;1;1;0	Tropomyosin beta chain	TPM2	tr|Q5TCU3|Q5TCU3_HUMAN Tropomyosin beta chain OS=Homo sapiens GN=TPM2 PE=1 SV=1;;tr|Q5TCU8|Q5TCU8_HUMAN Tropomyosin beta chain OS=Homo sapiens GN=TPM2 PE=1 SV=1;sp|P07951|TPM2_HUMAN Tropomyosin beta chain OS=Homo sapiens GN=TPM2 PE=1 SV=1	5	5	1	1	4	5	4	5	5	4	1	1	1	1	1	1	1	1	1	1	1	1	13.4	3.2	3.2	32.814	284	284;284;322;284;111	0.001328	7.5762	By MS/MS	By matching	By matching	By MS/MS	By MS/MS	By MS/MS	9.5	13.4	9.5	13.4	13.4	13
CON__Q86YZ3;Q86YZ3	CON__Q86YZ3;Q86YZ3	1;1	1;1	1;1	Hornerin	HRNR	;sp|Q86YZ3|HORN_HUMAN Hornerin OS=Homo sapiens GN=HRNR PE=1 SV=2	2	1	1	1	0	1	0	1	1	1	0	1	0	1	1	1	0	1	0	1	1	1	1.7	1.7	1.7	282.39	2850	2850;2850	0.0049628	6.752		By matching		By MS/MS	By MS/MS	By matching	0	1.7	0	1.7	1.7	1.7
D6RA57;H0Y9X1;Q96EY4	D6RA57;H0Y9X1;Q96EY4	1;1;1	1;1;1	1;1;1	Translation machinery-associated protein 16	TMA16	tr|D6RA57|D6RA57_HUMAN Translation machinery-associated protein 16 OS=Homo sapiens GN=TMA16 PE=1 SV=1;tr|H0Y9X1|H0Y9X1_HUMAN Translation machinery-associated protein 16 (Fragment) OS=Homo sapiens GN=TMA16 PE=1 SV=1;sp|Q96EY4|TMA16_HUMAN Translation machine	3	1	1	1	0	1	0	1	1	1	0	1	0	1	1	1	0	1	0	1	1	1	10.4	10.4	10.4	17.155	144	144;242;203	0.0048485	6.6469		By matching		By matching	By MS/MS	By matching	0	10.4	0	10.4	10.4	10.4
D6RAN8;H7C5U8;Q9P0M9	D6RAN8;H7C5U8;Q9P0M9	1;1;1	1;1;1	1;1;1	39S ribosomal protein L27, mitochondrial	MRPL27	tr|D6RAN8|D6RAN8_HUMAN 39S ribosomal protein L27, mitochondrial OS=Homo sapiens GN=MRPL27 PE=1 SV=1;tr|H7C5U8|H7C5U8_HUMAN 39S ribosomal protein L27, mitochondrial (Fragment) OS=Homo sapiens GN=MRPL27 PE=1 SV=1;sp|Q9P0M9|RM27_HUMAN 39S ribosomal protein L2	3	1	1	1	0	1	1	1	1	1	0	1	1	1	1	1	0	1	1	1	1	1	16.1	16.1	16.1	10.474	93	93;136;148	0.001297	7.2907		By matching	By matching	By MS/MS	By MS/MS	By matching	0	16.1	16.1	16.1	16.1	16.1
D6RDG3	D6RDG3	1	1	1	Transcription factor BTF3	BTF3	tr|D6RDG3|D6RDG3_HUMAN Transcription factor BTF3 (Fragment) OS=Homo sapiens GN=BTF3 PE=1 SV=3	1	1	1	1	0	1	1	1	1	1	0	1	1	1	1	1	0	1	1	1	1	1	9.2	9.2	9.2	11.802	109	109	0.0048544	6.6538		By matching	By matching	By MS/MS	By matching	By MS/MS	0	9.2	9.2	9.2	9.2	9.2
H0Y9G8;H0Y961;D6RGI3;D6RER5;Q9NVA2	H0Y9G8;H0Y961;D6RGI3;D6RER5;Q9NVA2	1;1;1;1;1	1;1;1;1;1	1;1;1;1;1	Septin-11	2020-09-11	tr|H0Y9G8|H0Y9G8_HUMAN Septin-11 (Fragment) OS=Homo sapiens GN=SEPT11 PE=1 SV=1;tr|H0Y961|H0Y961_HUMAN Septin-11 (Fragment) OS=Homo sapiens GN=SEPT11 PE=1 SV=1;tr|D6RGI3|D6RGI3_HUMAN Septin 11, isoform CRA_b OS=Homo sapiens GN=SEPT11 PE=1 SV=1;tr|D6RER5|D6	5	1	1	1	1	0	1	1	1	1	1	0	1	1	1	1	1	0	1	1	1	1	24.4	24.4	24.4	9.819	82	82;160;425;432;429	0.0048251	6.6019	By matching		By matching	By MS/MS	By matching	By MS/MS	24.4	0	24.4	24.4	24.4	24.4
E5RGX5;Q93045	E5RGX5;Q93045	3;3	1;1	1;1	Stathmin;Stathmin-2	STMN2	tr|E5RGX5|E5RGX5_HUMAN Stathmin OS=Homo sapiens GN=STMN2 PE=1 SV=1;sp|Q93045|STMN2_HUMAN Stathmin-2 OS=Homo sapiens GN=STMN2 PE=1 SV=3	2	3	1	1	3	2	2	2	3	2	1	1	1	1	1	1	1	1	1	1	1	1	11.9	6	6	19.574	168	168;179	0	12.831	By matching	By MS/MS	By MS/MS	By MS/MS	By MS/MS	By MS/MS	11.9	11.9	11.9	11.9	11.9	11.9
E5RK64;O95292	E5RK64;O95292	1;1	1;1	1;1	Vesicle-associated membrane protein-associated protein B/C	VAPB	tr|E5RK64|E5RK64_HUMAN Vesicle-associated membrane protein-associated protein B/C OS=Homo sapiens GN=VAPB PE=1 SV=1;sp|O95292|VAPB_HUMAN Vesicle-associated membrane protein-associated protein B/C OS=Homo sapiens GN=VAPB PE=1 SV=3	2	1	1	1	1	1	1	1	1	1	1	1	1	1	1	1	1	1	1	1	1	1	19.7	19.7	19.7	7.8009	71	71;243	0.0037453	6.8269	By matching	By matching	By MS/MS	By MS/MS	By MS/MS	By MS/MS	19.7	19.7	19.7	19.7	19.7	19.7
E7EU72;E7EVH6;E7ENR9;E7END6;P04070	E7EU72;E7EVH6;E7ENR9;E7END6;P04070	1;1;1;1;1	1;1;1;1;1	1;1;1;1;1	Osteocalcin;Vitamin K-dependent protein C;Vitamin K-dependent protein C light chain;Vitamin K-dependent protein C heavy chain;Activation peptide	PROC	tr|E7EU72|E7EU72_HUMAN Vitamin K-dependent protein C (Fragment) OS=Homo sapiens GN=PROC PE=1 SV=1;tr|E7EVH6|E7EVH6_HUMAN Vitamin K-dependent protein C (Fragment) OS=Homo sapiens GN=PROC PE=1 SV=1;tr|E7ENR9|E7ENR9_HUMAN Vitamin K-dependent protein C (Fragme	5	1	1	1	0	1	0	1	1	1	0	1	0	1	1	1	0	1	0	1	1	1	8.6	8.6	8.6	13.007	116	116;126;175;495;461	0.0012953	7.288		By MS/MS		By MS/MS	By MS/MS	By MS/MS	0	8.6	0	8.6	8.6	8.6
K7EJL1;E7ENJ6;Q9BXS5	K7EJL1;E7ENJ6;Q9BXS5	1;1;1	1;1;1	1;1;1	AP-1 complex subunit mu-1	AP1M1	tr|K7EJL1|K7EJL1_HUMAN AP-1 complex subunit mu-1 OS=Homo sapiens GN=AP1M1 PE=1 SV=1;tr|E7ENJ6|E7ENJ6_HUMAN AP-1 complex subunit mu-1 OS=Homo sapiens GN=AP1M1 PE=1 SV=1;sp|Q9BXS5|AP1M1_HUMAN AP-1 complex subunit mu-1 OS=Homo sapiens GN=AP1M1 PE=1 SV=3	3	1	1	1	1	1	1	1	1	1	1	1	1	1	1	1	1	1	1	1	1	1	3.1	3.1	3.1	40.296	351	351;370;423	0.004896	6.6834	By matching	By matching	By matching	By MS/MS	By MS/MS	By MS/MS	3.1	3.1	3.1	3.1	3.1	3.1
E7ERY9;H0Y7S3;Q16720;P23634;Q01814;P20020	E7ERY9;H0Y7S3;Q16720;P23634;Q01814;P20020	1;1;1;1;1;1	1;1;1;1;1;1	1;1;1;1;1;1	Calcium-transporting ATPase;Plasma membrane calcium-transporting ATPase 3;Plasma membrane calcium-transporting ATPase 4;Plasma membrane calcium-transporting ATPase 2;Plasma membrane calcium-transporting ATPase 1	ATP2B1;ATP2B2;ATP2B3;ATP2B4	tr|E7ERY9|E7ERY9_HUMAN Calcium-transporting ATPase OS=Homo sapiens GN=ATP2B1 PE=1 SV=2;tr|H0Y7S3|H0Y7S3_HUMAN Plasma membrane calcium-transporting ATPase 2 (Fragment) OS=Homo sapiens GN=ATP2B2 PE=1 SV=1;sp|Q16720|AT2B3_HUMAN Plasma membrane calcium-transpo	6	1	1	1	0	1	1	1	1	1	0	1	1	1	1	1	0	1	1	1	1	1	1.1	1.1	1.1	106.86	963	963;1099;1220;1241;1243;1258	0.0047962	6.5699		By matching	By matching	By MS/MS	By MS/MS	By MS/MS	0	1.1	1.1	1.1	1.1	1.1
E7ETY2	E7ETY2	10	1	1		TCOF1	tr|E7ETY2|E7ETY2_HUMAN Treacle protein OS=Homo sapiens GN=TCOF1 PE=1 SV=1	1	10	1	1	9	8	6	9	7	7	1	1	0	1	1	1	1	1	0	1	1	1	8.9	0.8	0.8	152.3	1488	1488	0.0012937	7.2855	By MS/MS	By matching	By matching	By MS/MS	By MS/MS	By matching	7.7	6.6	5.4	7.9	6.4	6.4
E7EWK3;Q9H2U1	E7EWK3;Q9H2U1	1;1	1;1	1;1	ATP-dependent RNA helicase DHX36	DHX36	tr|E7EWK3|E7EWK3_HUMAN ATP-dependent RNA helicase DHX36 (Fragment) OS=Homo sapiens GN=DHX36 PE=1 SV=1;sp|Q9H2U1|DHX36_HUMAN ATP-dependent RNA helicase DHX36 OS=Homo sapiens GN=DHX36 PE=1 SV=2	2	1	1	1	1	1	1	1	1	0	1	1	1	1	1	0	1	1	1	1	1	0	1.8	1.8	1.8	91.43	797	797;1008	0.0049261	6.7081	By matching	By matching	By matching	By matching	By MS/MS		1.8	1.8	1.8	1.8	1.8	0
E9PD53;Q9NTJ3	E9PD53;Q9NTJ3	1;1	1;1	1;1	Structural maintenance of chromosomes protein;Structural maintenance of chromosomes protein 4	SMC4	tr|E9PD53|E9PD53_HUMAN Structural maintenance of chromosomes protein OS=Homo sapiens GN=SMC4 PE=1 SV=1;sp|Q9NTJ3|SMC4_HUMAN Structural maintenance of chromosomes protein 4 OS=Homo sapiens GN=SMC4 PE=1 SV=2	2	1	1	1	1	1	1	1	1	1	1	1	1	1	1	1	1	1	1	1	1	1	0.9	0.9	0.9	144.45	1263	1263;1288	0.001321	7.4912	By matching	By matching	By matching	By MS/MS	By MS/MS	By MS/MS	0.9	0.9	0.9	0.9	0.9	0.9
E9PE20;P49458	E9PE20;P49458	1;1	1;1	1;1	Signal recognition particle 9 kDa protein	SRP9	tr|E9PE20|E9PE20_HUMAN Signal recognition particle 9 kDa protein OS=Homo sapiens GN=SRP9 PE=1 SV=1;sp|P49458|SRP09_HUMAN Signal recognition particle 9 kDa protein OS=Homo sapiens GN=SRP9 PE=1 SV=2	2	1	1	1	1	1	1	1	1	1	1	1	1	1	1	1	1	1	1	1	1	1	16.7	16.7	16.7	7.6677	66	66;86	0.0013228	7.5054	By MS/MS	By MS/MS	By MS/MS	By MS/MS	By MS/MS	By MS/MS	16.7	16.7	16.7	16.7	16.7	16.7
E9PFN5;Q9Y2Q3	E9PFN5;Q9Y2Q3	1;1	1;1	1;1	Glutathione S-transferase kappa 1	GSTK1	tr|E9PFN5|E9PFN5_HUMAN Glutathione S-transferase kappa 1 OS=Homo sapiens GN=GSTK1 PE=1 SV=1;sp|Q9Y2Q3|GSTK1_HUMAN Glutathione S-transferase kappa 1 OS=Homo sapiens GN=GSTK1 PE=1 SV=3	2	1	1	1	0	1	1	1	1	1	0	1	1	1	1	1	0	1	1	1	1	1	7.4	7.4	7.4	21.707	190	190;226	0.004902	6.6864		By matching	By matching	By MS/MS	By MS/MS	By MS/MS	0	7.4	7.4	7.4	7.4	7.4
E9PJA7	E9PJA7	31	1	1		BCLAF1	tr|E9PJA7|E9PJA7_HUMAN Bcl-2-associated transcription factor 1 OS=Homo sapiens GN=BCLAF1 PE=1 SV=1	1	31	1	1	28	30	30	27	28	27	1	1	1	0	0	1	1	1	1	0	0	1	51.2	3	3	52.917	467	467	1	-2	By matching	By MS/MS	By MS/MS	By matching	By matching	By matching	50.3	50.3	50.3	48.2	48.2	51.2
E9PJF0;E9PQW4;P27361	E9PJF0;E9PQW4;P27361	1;1;1	1;1;1	1;1;1	Mitogen-activated protein kinase;Mitogen-activated protein kinase 3	MAPK3	tr|E9PJF0|E9PJF0_HUMAN Mitogen-activated protein kinase OS=Homo sapiens GN=MAPK3 PE=1 SV=1;tr|E9PQW4|E9PQW4_HUMAN Mitogen-activated protein kinase OS=Homo sapiens GN=MAPK3 PE=1 SV=1;sp|P27361|MK03_HUMAN Mitogen-activated protein kinase 3 OS=Homo sapiens GN	3	1	1	1	1	0	0	1	1	1	1	0	0	1	1	1	1	0	0	1	1	1	4.4	4.4	4.4	35.737	316	316;339;379	0.0012903	7.2479	By matching			By MS/MS	By MS/MS	By MS/MS	4.4	0	0	4.4	4.4	4.4
E9PMI6;E9PJF4;J3KN38;P54105	E9PMI6;E9PJF4;J3KN38;P54105	1;1;1;1	1;1;1;1	1;1;1;1	Methylosome subunit pICln	CLNS1A	tr|E9PMI6|E9PMI6_HUMAN Methylosome subunit pICln OS=Homo sapiens GN=CLNS1A PE=1 SV=1;tr|E9PJF4|E9PJF4_HUMAN Methylosome subunit pICln OS=Homo sapiens GN=CLNS1A PE=1 SV=1;tr|J3KN38|J3KN38_HUMAN Methylosome subunit pICln OS=Homo sapiens GN=CLNS1A PE=1 SV=1;s	4	1	1	1	1	1	1	1	1	1	1	1	1	1	1	1	1	1	1	1	1	1	7.8	7.8	7.8	18.259	167	167;179;203;237	0	12.185	By MS/MS	By MS/MS	By matching	By MS/MS	By MS/MS	By MS/MS	7.8	7.8	7.8	7.8	7.8	7.8
E9PK91;E9PQN2;E9PKI6;E9PK09;H0YF00;H0YF63	E9PK91;E9PQN2;E9PKI6;E9PK09	71;66;66;64;12;5	1;0;0;0;0;1	1;0;0;0;0;1		BCLAF1	tr|E9PK91|E9PK91_HUMAN Bcl-2-associated transcription factor 1 OS=Homo sapiens GN=BCLAF1 PE=1 SV=1;tr|E9PQN2|E9PQN2_HUMAN Bcl-2-associated transcription factor 1 OS=Homo sapiens GN=BCLAF1 PE=1 SV=1;tr|E9PKI6|E9PKI6_HUMAN Bcl-2-associated transcription fact	6	71	1	1	64	67	68	62	64	62	1	1	1	1	1	1	1	1	1	1	1	1	50.4	1.8	1.8	100.4	871	871;750;752;726;118;126	0.0013263	7.5677	By MS/MS	By MS/MS	By matching	By matching	By matching	By MS/MS	49.1	49.4	49.4	49	49.3	49.6
E9PQV8;O00303	E9PQV8;O00303	1;1	1;1	1;1	Eukaryotic translation initiation factor 3 subunit F	EIF3F	tr|E9PQV8|E9PQV8_HUMAN Eukaryotic translation initiation factor 3 subunit F OS=Homo sapiens GN=EIF3F PE=1 SV=1;sp|O00303|EIF3F_HUMAN Eukaryotic translation initiation factor 3 subunit F OS=Homo sapiens GN=EIF3F PE=1 SV=1	2	1	1	1	1	1	1	1	1	1	1	1	1	1	1	1	1	1	1	1	1	1	12.1	12.1	12.1	11.606	124	124;357	0.0012739	7.0934	By matching	By matching	By matching	By MS/MS	By MS/MS	By matching	12.1	12.1	12.1	12.1	12.1	12.1
F2Z2Q9;G5E9R5;P24666	F2Z2Q9;G5E9R5;P24666	1;1;1	1;1;1	1;1;1	Low molecular weight phosphotyrosine protein phosphatase	ACP1	tr|F2Z2Q9|F2Z2Q9_HUMAN Low molecular weight phosphotyrosine protein phosphatase OS=Homo sapiens GN=ACP1 PE=1 SV=1;tr|G5E9R5|G5E9R5_HUMAN Acid phosphatase 1, soluble, isoform CRA_d OS=Homo sapiens GN=ACP1 PE=1 SV=1;sp|P24666|PPAC_HUMAN Low molecular weight	3	1	1	1	1	1	1	1	1	1	1	1	1	1	1	1	1	1	1	1	1	1	17.1	17.1	17.1	7.5005	70	70;80;158	0.0094229	6.4398	By matching	By matching	By matching	By MS/MS	By MS/MS	By MS/MS	17.1	17.1	17.1	17.1	17.1	17.1
F5H168;F5GY32;F8W9U5;F5H1B2;F5GXL3;F5H1S9;G8JLB3;Q9Y606	F5H168;F5GY32;F8W9U5;F5H1B2;F5GXL3;F5H1S9;G8JLB3;Q9Y606	1;1;1;1;1;1;1;1	1;1;1;1;1;1;1;1	1;1;1;1;1;1;1;1	tRNA pseudouridine synthase;tRNA pseudouridine synthase A, mitochondrial	PUS1	tr|F5H168|F5H168_HUMAN tRNA pseudouridine synthase A, mitochondrial OS=Homo sapiens GN=PUS1 PE=1 SV=1;tr|F5GY32|F5GY32_HUMAN tRNA pseudouridine synthase A, mitochondrial (Fragment) OS=Homo sapiens GN=PUS1 PE=1 SV=2;tr|F8W9U5|F8W9U5_HUMAN tRNA pseudouridine	8	1	1	1	0	1	1	1	1	0	0	1	1	1	1	0	0	1	1	1	1	0	9	9	9	14.528	134	134;153;156;184;200;374;384;427	0.0049566	6.7263		By matching	By matching	By MS/MS	By matching		0	9	9	9	9	0
F8WAX7;F6XHT0;Q9Y6D0	F8WAX7;F6XHT0;Q9Y6D0	1;1;1	1;1;1	1;1;1	Selenoprotein K	SELK	tr|F8WAX7|F8WAX7_HUMAN Selenoprotein K OS=Homo sapiens GN=SELK PE=1 SV=1;tr|F6XHT0|F6XHT0_HUMAN Selenoprotein K OS=Homo sapiens GN=SELK PE=1 SV=1;sp|Q9Y6D0|SELK_HUMAN Selenoprotein K OS=Homo sapiens GN=SELK PE=1 SV=3	3	1	1	1	0	0	0	1	1	0	0	0	0	1	1	0	0	0	0	1	1	0	16.7	16.7	16.7	8.2912	72	72;93;94	0.0094007	6.435				By MS/MS	By MS/MS		0	0	0	16.7	16.7	0
F8VVM2;Q00325	F8VVM2;Q00325	1;1	1;1	1;1	Phosphate carrier protein, mitochondrial	SLC25A3	tr|F8VVM2|F8VVM2_HUMAN Phosphate carrier protein, mitochondrial OS=Homo sapiens GN=SLC25A3 PE=1 SV=1;sp|Q00325|MPCP_HUMAN Phosphate carrier protein, mitochondrial OS=Homo sapiens GN=SLC25A3 PE=1 SV=2	2	1	1	1	1	1	1	1	1	1	1	1	1	1	1	1	1	1	1	1	1	1	3.7	3.7	3.7	36.161	324	324;362	0.0013699	8.0294	By MS/MS	By MS/MS	By MS/MS	By MS/MS	By MS/MS	By MS/MS	3.7	3.7	3.7	3.7	3.7	3.7
F8W7G9;F8WAX8;P52701	F8W7G9;F8WAX8;P52701	1;1;1	1;1;1	1;1;1	DNA mismatch repair protein Msh6	MSH6	tr|F8W7G9|F8W7G9_HUMAN DNA mismatch repair protein Msh6 OS=Homo sapiens GN=MSH6 PE=1 SV=1;tr|F8WAX8|F8WAX8_HUMAN DNA mismatch repair protein Msh6 OS=Homo sapiens GN=MSH6 PE=1 SV=1;sp|P52701|MSH6_HUMAN DNA mismatch repair protein Msh6 OS=Homo sapiens GN=MSH	3	1	1	1	1	1	1	1	1	1	1	1	1	1	1	1	1	1	1	1	1	1	27.9	27.9	27.9	10.577	104	104;160;1360	0	16.761	By matching	By matching	By matching	By MS/MS	By MS/MS	By MS/MS	27.9	27.9	27.9	27.9	27.9	27.9
G3V113;H0YBP9;Q15819	G3V113;H0YBP9;Q15819	1;1;1	1;1;1	1;1;1	Ubiquitin-conjugating enzyme E2 variant 2	UBE2V2	tr|G3V113|G3V113_HUMAN Ubiquitin-conjugating enzyme E2 variant 2 OS=Homo sapiens GN=UBE2V2 PE=1 SV=1;tr|H0YBP9|H0YBP9_HUMAN Ubiquitin-conjugating enzyme E2 variant 2 (Fragment) OS=Homo sapiens GN=UBE2V2 PE=1 SV=1;sp|Q15819|UB2V2_HUMAN Ubiquitin-conjugating	3	1	1	1	1	1	1	1	1	1	1	1	1	1	1	1	1	1	1	1	1	1	15.2	15.2	15.2	12.017	105	105;109;145	0.0048603	6.6587	By matching	By matching	By matching	By matching	By MS/MS	By matching	15.2	15.2	15.2	15.2	15.2	15.2
G3V3K9;G3V4I1;G3V5F3;J3KNG4;Q8WVM8	G3V3K9;G3V4I1;G3V5F3;J3KNG4;Q8WVM8	1;1;1;1;1	1;1;1;1;1	1;1;1;1;1	Sec1 family domain-containing protein 1	SCFD1	tr|G3V3K9|G3V3K9_HUMAN Sec1 family domain-containing protein 1 OS=Homo sapiens GN=SCFD1 PE=1 SV=1;tr|G3V4I1|G3V4I1_HUMAN Sec1 family domain-containing protein 1 OS=Homo sapiens GN=SCFD1 PE=1 SV=1;tr|G3V5F3|G3V5F3_HUMAN Sec1 family domain-containing protein	5	1	1	1	1	0	0	0	0	1	1	0	0	0	0	1	1	0	0	0	0	1	31.2	31.2	31.2	5.0969	48	48;75;121;163;642	0.0012755	7.0939	By matching					By MS/MS	31.2	0	0	0	0	31.2
G3V3W9;O95433	G3V3W9;O95433	1;1	1;1	1;1	Activator of 90 kDa heat shock protein ATPase homolog 1	AHSA1	tr|G3V3W9|G3V3W9_HUMAN Activator of 90 kDa heat shock protein ATPase homolog 1 OS=Homo sapiens GN=AHSA1 PE=1 SV=1;sp|O95433|AHSA1_HUMAN Activator of 90 kDa heat shock protein ATPase homolog 1 OS=Homo sapiens GN=AHSA1 PE=1 SV=1	2	1	1	1	1	1	1	1	1	1	1	1	1	1	1	1	1	1	1	1	1	1	14	14	14	11.62	100	100;338	0.0013333	7.6006	By MS/MS	By matching	By MS/MS	By MS/MS	By MS/MS	By MS/MS	14	14	14	14	14	14
G3V4F7;P61011	G3V4F7;P61011	1;1	1;1	1;1	Signal recognition particle 54 kDa protein	SRP54	tr|G3V4F7|G3V4F7_HUMAN Signal recognition particle 54 kDa protein OS=Homo sapiens GN=SRP54 PE=1 SV=1;sp|P61011|SRP54_HUMAN Signal recognition particle 54 kDa protein OS=Homo sapiens GN=SRP54 PE=1 SV=1	2	1	1	1	1	1	1	1	1	0	1	1	1	1	1	0	1	1	1	1	1	0	2.5	2.5	2.5	48.67	440	440;504	0.00489	6.6834	By matching	By matching	By MS/MS	By MS/MS	By MS/MS		2.5	2.5	2.5	2.5	2.5	0
G3XAL9;P55011	G3XAL9;P55011	1;1	1;1	1;1	Solute carrier family 12 member 2	SLC12A2	tr|G3XAL9|G3XAL9_HUMAN Solute carrier family 12 (Sodium/potassium/chloride transporters), member 2, isoform CRA_a OS=Homo sapiens GN=SLC12A2 PE=1 SV=1;sp|P55011|S12A2_HUMAN Solute carrier family 12 member 2 OS=Homo sapiens GN=SLC12A2 PE=1 SV=1	2	1	1	1	0	0	0	1	1	1	0	0	0	1	1	1	0	0	0	1	1	1	1.9	1.9	1.9	124.59	1150	1150;1212	0.0013889	8.6949				By MS/MS	By matching	By matching	0	0	0	1.9	1.9	1.9
H7C5F2;H7C5H3;G5E9W7;G5E9V5;P82650	H7C5F2;H7C5H3;G5E9W7;G5E9V5;P82650	1;1;1;1;1	1;1;1;1;1	1;1;1;1;1	28S ribosomal protein S22, mitochondrial	MRPS22	tr|H7C5F2|H7C5F2_HUMAN 28S ribosomal protein S22, mitochondrial (Fragment) OS=Homo sapiens GN=MRPS22 PE=1 SV=1;tr|H7C5H3|H7C5H3_HUMAN 28S ribosomal protein S22, mitochondrial (Fragment) OS=Homo sapiens GN=MRPS22 PE=1 SV=1;tr|G5E9W7|G5E9W7_HUMAN 28S ribosom	5	1	1	1	0	0	1	1	1	1	0	0	1	1	1	1	0	0	1	1	1	1	7.3	7.3	7.3	18.573	165	165;200;319;359;360	0.0048077	6.5868			By matching	By matching	By MS/MS	By MS/MS	0	0	7.3	7.3	7.3	7.3
H0YDD8;P05387	H0YDD8;P05387	1;1	1;1	1;1	60S acidic ribosomal protein P2	RPLP2	tr|H0YDD8|H0YDD8_HUMAN 60S acidic ribosomal protein P2 (Fragment) OS=Homo sapiens GN=RPLP2 PE=1 SV=1;sp|P05387|RLA2_HUMAN 60S acidic ribosomal protein P2 OS=Homo sapiens GN=RPLP2 PE=1 SV=1	2	1	1	1	1	1	1	1	1	1	1	1	1	1	1	1	1	1	1	1	1	1	13	13	13	8.9857	92	92;115	0.001355	7.7769	By MS/MS	By matching	By matching	By MS/MS	By matching	By matching	13	13	13	13	13	13
H0YE03;H7C3G7;Q2TBE0	H0YE03;H7C3G7;Q2TBE0	1;1;1	1;1;1	1;1;1	CWF19-like protein 2	CWF19L2	tr|H0YE03|H0YE03_HUMAN CWF19-like protein 2 (Fragment) OS=Homo sapiens GN=CWF19L2 PE=1 SV=1;tr|H7C3G7|H7C3G7_HUMAN CWF19-like protein 2 (Fragment) OS=Homo sapiens GN=CWF19L2 PE=1 SV=1;sp|Q2TBE0|C19L2_HUMAN CWF19-like protein 2 OS=Homo sapiens GN=CWF19L2 PE	3	1	1	1	1	1	1	1	1	0	1	1	1	1	1	0	1	1	1	1	1	0	1.8	1.8	1.8	63.569	553	553;623;894	0.0071174	6.5047	By MS/MS	By MS/MS	By MS/MS	By matching	By MS/MS		1.8	1.8	1.8	1.8	1.8	0
H0YLE8;P46940	H0YLE8;P46940	1;1	1;1	1;1	Ras GTPase-activating-like protein IQGAP1	IQGAP1	tr|H0YLE8|H0YLE8_HUMAN Ras GTPase-activating-like protein IQGAP1 OS=Homo sapiens GN=IQGAP1 PE=1 SV=1;sp|P46940|IQGA1_HUMAN Ras GTPase-activating-like protein IQGAP1 OS=Homo sapiens GN=IQGAP1 PE=1 SV=1	2	1	1	1	0	0	1	1	1	0	0	0	1	1	1	0	0	0	1	1	1	0	1	1	1	124.79	1085	1085;1657	0.004908	6.6936			By matching	By matching	By MS/MS		0	0	1	1	1	0
H0YLR3;H0YMA0;P09661	H0YLR3;H0YMA0;P09661	1;1;1	1;1;1	1;1;1	U2 small nuclear ribonucleoprotein A	SNRPA1	tr|H0YLR3|H0YLR3_HUMAN U2 small nuclear ribonucleoprotein A (Fragment) OS=Homo sapiens GN=SNRPA1 PE=1 SV=1;tr|H0YMA0|H0YMA0_HUMAN U2 small nuclear ribonucleoprotein A (Fragment) OS=Homo sapiens GN=SNRPA1 PE=1 SV=1;sp|P09661|RU2A_HUMAN U2 small nuclear ri	3	1	1	1	0	0	0	1	1	1	0	0	0	1	1	1	0	0	0	1	1	1	15.7	15.7	15.7	9.4775	89	89;142;255	0.0013569	7.7953				By MS/MS	By MS/MS	By matching	0	0	0	15.7	15.7	15.7
H3BMQ1;H3BPF6;Q99471	H3BMQ1;H3BPF6;Q99471	1;1;1	1;1;1	1;1;1	Prefoldin subunit 5	PFDN5	tr|H3BMQ1|H3BMQ1_HUMAN Prefoldin subunit 5 OS=Homo sapiens GN=PFDN5 PE=1 SV=1;tr|H3BPF6|H3BPF6_HUMAN Prefoldin subunit 5 (Fragment) OS=Homo sapiens GN=PFDN5 PE=1 SV=1;sp|Q99471|PFD5_HUMAN Prefoldin subunit 5 OS=Homo sapiens GN=PFDN5 PE=1 SV=2	3	1	1	1	0	0	0	1	1	1	0	0	0	1	1	1	0	0	0	1	1	1	17.9	17.9	17.9	9.5351	84	84;152;154	0.0025316	6.927				By MS/MS	By MS/MS	By MS/MS	0	0	0	17.9	17.9	17.9
H3BN04;P49914	H3BN04;P49914	1;1	1;1	1;1	5-formyltetrahydrofolate cyclo-ligase	MTHFS	tr|H3BN04|H3BN04_HUMAN 5-formyltetrahydrofolate cyclo-ligase OS=Homo sapiens GN=MTHFS PE=1 SV=1;sp|P49914|MTHFS_HUMAN 5-formyltetrahydrofolate cyclo-ligase OS=Homo sapiens GN=MTHFS PE=1 SV=2	2	1	1	1	1	1	1	0	1	0	1	1	1	0	1	0	1	1	1	0	1	0	22.7	22.7	22.7	4.9367	44	44;203	0.0048426	6.6315	By MS/MS	By MS/MS	By MS/MS		By MS/MS		22.7	22.7	22.7	0	22.7	0
H3BRI0;H3BNX8;P20674	H3BRI0;H3BNX8;P20674	1;1;1	1;1;1	1;1;1	Cytochrome c oxidase subunit 5A, mitochondrial	COX5A	tr|H3BRI0|H3BRI0_HUMAN Cytochrome c oxidase subunit 5A, mitochondrial OS=Homo sapiens GN=COX5A PE=1 SV=1;tr|H3BNX8|H3BNX8_HUMAN Cytochrome c oxidase subunit 5A, mitochondrial OS=Homo sapiens GN=COX5A PE=1 SV=1;sp|P20674|COX5A_HUMAN Cytochrome c oxidase sub	3	1	1	1	0	0	1	0	0	1	0	0	1	0	0	1	0	0	1	0	0	1	19	19	19	9.2603	84	84;153;150	0.0013038	7.363			By matching			By MS/MS	0	0	19	0	0	19
H3BSW3;H3BQF1;H3BQZ9;P07741	H3BSW3;H3BQF1;H3BQZ9;P07741	1;1;1;1	1;1;1;1	1;1;1;1	Adenine phosphoribosyltransferase	APRT	tr|H3BSW3|H3BSW3_HUMAN Adenine phosphoribosyltransferase OS=Homo sapiens GN=APRT PE=1 SV=1;tr|H3BQF1|H3BQF1_HUMAN Adenine phosphoribosyltransferase (Fragment) OS=Homo sapiens GN=APRT PE=1 SV=7;tr|H3BQZ9|H3BQZ9_HUMAN Adenine phosphoribosyltransferase OS=Hom	4	1	1	1	1	0	1	1	1	0	1	0	1	1	1	0	1	0	1	1	1	0	17.5	17.5	17.5	6.9189	63	63;149;153;180	0.0049383	6.7159	By matching		By matching	By MS/MS	By matching		17.5	0	17.5	17.5	17.5	0
H3BS70;Q96DC0;P42126	H3BS70;Q96DC0;P42126	1;1;1	1;1;1	1;1;1	Enoyl-CoA delta isomerase 1, mitochondrial	ECI1;DCI	tr|H3BS70|H3BS70_HUMAN Enoyl-CoA delta isomerase 1, mitochondrial (Fragment) OS=Homo sapiens GN=ECI1 PE=1 SV=1;tr|Q96DC0|Q96DC0_HUMAN DCI protein OS=Homo sapiens GN=DCI PE=1 SV=1;sp|P42126|ECI1_HUMAN Enoyl-CoA delta isomerase 1, mitochondrial OS=Homo sapie	3	1	1	1	1	0	1	1	1	0	1	0	1	1	1	0	1	0	1	1	1	0	5.8	5.8	5.8	24.704	224	224;243;302	0.0013405	7.68	By matching		By matching	By MS/MS	By MS/MS		5.8	0	5.8	5.8	5.8	0
H7BZQ4;Q96P26	H7BZQ4;Q96P26	1;1	1;1	1;1	Cytosolic 5-nucleotidase 1B	NT5C1B	tr|H7BZQ4|H7BZQ4_HUMAN Cytosolic 5-nucleotidase 1B (Fragment) OS=Homo sapiens GN=NT5C1B PE=1 SV=1;sp|Q96P26|5NT1B_HUMAN Cytosolic 5-nucleotidase 1B OS=Homo sapiens GN=NT5C1B PE=2 SV=2	2	1	1	1	0	0	0	0	1	0	0	0	0	0	1	0	0	0	0	0	1	0	3	3	3	29.648	265	265;610	1	-2					By MS/MS		0	0	0	0	3	0
H7C010;Q8IWJ2	H7C010;Q8IWJ2	1;1	1;1	1;1	GRIP and coiled-coil domain-containing protein 2	GCC2	tr|H7C010|H7C010_HUMAN GRIP and coiled-coil domain-containing protein 2 (Fragment) OS=Homo sapiens GN=GCC2 PE=1 SV=1;sp|Q8IWJ2|GCC2_HUMAN GRIP and coiled-coil domain-containing protein 2 OS=Homo sapiens GN=GCC2 PE=1 SV=4	2	1	1	1	1	1	0	0	0	1	1	1	0	0	0	1	1	1	0	0	0	1	9.2	9.2	9.2	9.9524	87	87;1684	0.004884	6.6747	By matching	By matching				By MS/MS	9.2	9.2	0	0	0	9.2
H7C0Q6;Q9C037	H7C0Q6;Q9C037	1;1	1;1	1;1	E3 ubiquitin-protein ligase TRIM4	TRIM4	tr|H7C0Q6|H7C0Q6_HUMAN E3 ubiquitin-protein ligase TRIM4 (Fragment) OS=Homo sapiens GN=TRIM4 PE=1 SV=1;sp|Q9C037|TRIM4_HUMAN E3 ubiquitin-protein ligase TRIM4 OS=Homo sapiens GN=TRIM4 PE=1 SV=2	2	1	1	1	1	1	0	1	1	1	1	1	0	1	1	1	1	1	0	1	1	1	5.4	5.4	5.4	23.413	202	202;500	1	-2	By matching	By matching		By MS/MS	By MS/MS	By matching	5.4	5.4	0	5.4	5.4	5.4
I3L1P8;Q02978	I3L1P8;Q02978	1;1	1;1	1;1	Mitochondrial 2-oxoglutarate/malate carrier protein	SLC25A11	tr|I3L1P8|I3L1P8_HUMAN Mitochondrial 2-oxoglutarate/malate carrier protein (Fragment) OS=Homo sapiens GN=SLC25A11 PE=1 SV=1;sp|Q02978|M2OM_HUMAN Mitochondrial 2-oxoglutarate/malate carrier protein OS=Homo sapiens GN=SLC25A11 PE=1 SV=3	2	1	1	1	1	1	1	1	1	1	1	1	1	1	1	1	1	1	1	1	1	1	5.4	5.4	5.4	32.182	296	296;314	0.0013774	8.2849	By MS/MS	By matching	By MS/MS	By MS/MS	By MS/MS	By MS/MS	5.4	5.4	5.4	5.4	5.4	5.4
I3L3H2;P38919	I3L3H2;P38919	2;2	1;1	1;1	Eukaryotic initiation factor 4A-III;Eukaryotic initiation factor 4A-III, N-terminally processed	EIF4A3	tr|I3L3H2|I3L3H2_HUMAN Eukaryotic initiation factor 4A-III (Fragment) OS=Homo sapiens GN=EIF4A3 PE=1 SV=1;sp|P38919|IF4A3_HUMAN Eukaryotic initiation factor 4A-III OS=Homo sapiens GN=EIF4A3 PE=1 SV=4	2	2	1	1	0	1	1	2	2	1	0	1	1	1	1	1	0	1	1	1	1	1	23.2	10.4	10.4	13.583	125	125;411	0	11.436		By matching	By MS/MS	By MS/MS	By MS/MS	By MS/MS	0	10.4	10.4	23.2	23.2	10.4
J3KN67;P06753;K7EP68;H0YL80;H0YKX5;H0YKP3;H0YNC7;H0YL52;Q6ZN40;P09493	J3KN67;P06753	15;9;4;3;3;3;3;3;3;3	1;1;0;0;0;0;0;0;0;0	1;1;0;0;0;0;0;0;0;0	Tropomyosin alpha-3 chain	TPM3	tr|J3KN67|J3KN67_HUMAN Tropomyosin alpha-3 chain OS=Homo sapiens GN=TPM3 PE=1 SV=1;sp|P06753|TPM3_HUMAN Tropomyosin alpha-3 chain OS=Homo sapiens GN=TPM3 PE=1 SV=2	10	15	1	1	13	14	14	14	13	13	0	0	0	0	0	1	0	0	0	0	0	1	38.9	4.6	4.6	33.222	285	285;285;138;68;142;157;223;265;326;284	0.0014045	10.003	By matching	By matching	By matching	By matching	By matching	By MS/MS	34.4	34.4	34.4	34.4	34.4	35.8
J3KRR0;J3QQM5;Q9BT23	J3KRR0;J3QQM5;Q9BT23	1;1;1	1;1;1	1;1;1	LIM domain-containing protein 2	LIMD2	tr|J3KRR0|J3KRR0_HUMAN LIM domain containing 2, isoform CRA_b OS=Homo sapiens GN=LIMD2 PE=1 SV=1;tr|J3QQM5|J3QQM5_HUMAN LIM domain-containing protein 2 (Fragment) OS=Homo sapiens GN=LIMD2 PE=1 SV=1;sp|Q9BT23|LIMD2_HUMAN LIM domain-containing protein 2 OS=H	3	1	1	1	0	0	0	1	0	1	0	0	0	1	0	1	0	0	0	1	0	1	19.5	19.5	19.5	9.5175	87	87;109;127	0.0013928	9.1207				By MS/MS		By MS/MS	0	0	0	19.5	0	19.5
J3KS15;Q14197	J3KS15;Q14197	1;1	1;1	1;1	Peptidyl-tRNA hydrolase ICT1, mitochondrial	ICT1	tr|J3KS15|J3KS15_HUMAN Peptidyl-tRNA hydrolase ICT1, mitochondrial (Fragment) OS=Homo sapiens GN=ICT1 PE=1 SV=1;sp|Q14197|ICT1_HUMAN Peptidyl-tRNA hydrolase ICT1, mitochondrial OS=Homo sapiens GN=ICT1 PE=1 SV=1	2	1	1	1	0	0	0	1	1	0	0	0	0	1	1	0	0	0	0	1	1	0	6.2	6.2	6.2	21.905	192	192;206	0.0013158	7.4543				By MS/MS	By MS/MS		0	0	0	6.2	6.2	0
J3QRY4;O00231	J3QRY4;O00231	1;1	1;1	1;1	26S proteasome non-ATPase regulatory subunit 11	PSMD11	tr|J3QRY4|J3QRY4_HUMAN 26S proteasome non-ATPase regulatory subunit 11 (Fragment) OS=Homo sapiens GN=PSMD11 PE=1 SV=7;sp|O00231|PSD11_HUMAN 26S proteasome non-ATPase regulatory subunit 11 OS=Homo sapiens GN=PSMD11 PE=1 SV=3	2	1	1	1	0	0	1	1	1	1	0	0	1	1	1	1	0	0	1	1	1	1	5.3	5.3	5.3	21.18	188	188;422	0.0013532	7.7751			By MS/MS	By MS/MS	By MS/MS	By MS/MS	0	0	5.3	5.3	5.3	5.3
K7EJY5;Q6P1N0	K7EJY5;Q6P1N0	1;1	1;1	1;1	Coiled-coil and C2 domain-containing protein 1A	CC2D1A	tr|K7EJY5|K7EJY5_HUMAN Coiled-coil and C2 domain-containing protein 1A (Fragment) OS=Homo sapiens GN=CC2D1A PE=1 SV=1;sp|Q6P1N0|C2D1A_HUMAN Coiled-coil and C2 domain-containing protein 1A OS=Homo sapiens GN=CC2D1A PE=1 SV=1	2	1	1	1	1	1	1	1	1	0	1	1	1	1	1	0	1	1	1	1	1	0	2.9	2.9	2.9	39.079	378	378;951	0.0012987	7.3003	By matching	By matching	By matching	By MS/MS	By MS/MS		2.9	2.9	2.9	2.9	2.9	0
K7EM18;P41567;O60739	K7EM18;P41567;O60739	1;1;1	1;1;1	1;1;1	Eukaryotic translation initiation factor 1;Eukaryotic translation initiation factor 1b	EIF1;EIF1B	tr|K7EM18|K7EM18_HUMAN Eukaryotic translation initiation factor 1 OS=Homo sapiens GN=EIF1 PE=1 SV=1;sp|P41567|EIF1_HUMAN Eukaryotic translation initiation factor 1 OS=Homo sapiens GN=EIF1 PE=1 SV=1;sp|O60739|EIF1B_HUMAN Eukaryotic translation initiation fa	3	1	1	1	0	1	1	1	1	1	0	1	1	1	1	1	0	1	1	1	1	1	13.2	13.2	13.2	13.607	121	121;113;113	0.0013587	7.7991		By MS/MS	By matching	By MS/MS	By MS/MS	By MS/MS	0	13.2	13.2	13.2	13.2	13.2
K7ER00;Q9Y285	K7ER00;Q9Y285	1;1	1;1	1;1	Phenylalanine--tRNA ligase alpha subunit	FARSA	tr|K7ER00|K7ER00_HUMAN Phenylalanine--tRNA ligase alpha subunit OS=Homo sapiens GN=FARSA PE=1 SV=1;sp|Q9Y285|SYFA_HUMAN Phenylalanine--tRNA ligase alpha subunit OS=Homo sapiens GN=FARSA PE=1 SV=3	2	1	1	1	1	1	1	1	1	1	1	1	1	1	1	1	1	1	1	1	1	1	2.6	2.6	2.6	62.395	548	548;508	0.0093897	6.4334	By matching	By matching	By matching	By MS/MS	By MS/MS	By MS/MS	2.6	2.6	2.6	2.6	2.6	2.6
M0QZM1	M0QZM1	9	1	1		HNRNPM	tr|M0QZM1|M0QZM1_HUMAN Heterogeneous nuclear ribonucleoprotein M (Fragment) OS=Homo sapiens GN=HNRNPM PE=1 SV=1	1	9	1	1	2	6	9	9	9	7	0	1	1	1	1	0	0	1	1	1	1	0	26.9	3.7	3.7	39.933	383	383	0.0059737	6.5304	By matching	By matching	By matching	By MS/MS	By MS/MS	By matching	8.1	19.8	26.9	26.9	26.9	20.4
O00170	O00170	1	1	1	AH receptor-interacting protein	AIP	sp|O00170|AIP_HUMAN AH receptor-interacting protein OS=Homo sapiens GN=AIP PE=1 SV=2	1	1	1	1	1	1	1	1	1	1	1	1	1	1	1	1	1	1	1	1	1	1	4.2	4.2	4.2	37.636	330	330	0.0013072	7.3978	By matching	By matching	By matching	By MS/MS	By MS/MS	By MS/MS	4.2	4.2	4.2	4.2	4.2	4.2
O00264;U3KQM0	O00264;U3KQM0	2;1	1;0	1;0	Membrane-associated progesterone receptor component 1	PGRMC1;PGRMC2	sp|O00264|PGRC1_HUMAN Membrane-associated progesterone receptor component 1 OS=Homo sapiens GN=PGRMC1 PE=1 SV=3;tr|U3KQM0|U3KQM0_HUMAN Membrane-associated progesterone receptor component 2 OS=Homo sapiens GN=PGRMC2 PE=1 SV=1	2	2	1	1	2	2	2	2	2	2	1	1	1	1	1	1	1	1	1	1	1	1	11.8	7.2	7.2	21.671	195	195;91	0.001292	7.2495	By matching	By matching	By matching	By MS/MS	By MS/MS	By MS/MS	11.8	11.8	11.8	11.8	11.8	11.8
O00483	O00483	1	1	1	Cytochrome c oxidase subunit NDUFA4	NDUFA4	sp|O00483|NDUA4_HUMAN Cytochrome c oxidase subunit NDUFA4 OS=Homo sapiens GN=NDUFA4 PE=1 SV=1	1	1	1	1	1	1	1	1	1	1	1	1	1	1	1	1	1	1	1	1	1	1	12.3	12.3	12.3	9.3697	81	81	0.0049444	6.7252	By matching	By matching	By matching	By MS/MS	By MS/MS	By MS/MS	12.3	12.3	12.3	12.3	12.3	12.3
O14929	O14929	1	1	1	Histone acetyltransferase type B catalytic subunit	HAT1	sp|O14929|HAT1_HUMAN Histone acetyltransferase type B catalytic subunit OS=Homo sapiens GN=HAT1 PE=1 SV=1	1	1	1	1	0	0	0	1	0	1	0	0	0	1	0	1	0	0	0	1	0	1	3.1	3.1	3.1	49.512	419	419	0.0013624	7.8323				By MS/MS		By MS/MS	0	0	0	3.1	0	3.1
O14949	O14949	1	1	1	Cytochrome b-c1 complex subunit 8	UQCRQ	sp|O14949|QCR8_HUMAN Cytochrome b-c1 complex subunit 8 OS=Homo sapiens GN=UQCRQ PE=1 SV=4	1	1	1	1	1	0	1	1	1	0	1	0	1	1	1	0	1	0	1	1	1	0	15.9	15.9	15.9	9.9062	82	82	0.0048135	6.6012	By matching		By matching	By MS/MS	By matching		15.9	0	15.9	15.9	15.9	0
O15511	O15511	1	1	1	Actin-related protein 2/3 complex subunit 5	ARPC5	sp|O15511|ARPC5_HUMAN Actin-related protein 2/3 complex subunit 5 OS=Homo sapiens GN=ARPC5 PE=1 SV=3	1	1	1	1	0	1	1	1	0	0	0	1	1	1	0	0	0	1	1	1	0	0	7.9	7.9	7.9	16.32	151	151	0.0094118	6.4398		By matching	By matching	By MS/MS			0	7.9	7.9	7.9	0	0
O60783	O60783	1	1	1	28S ribosomal protein S14, mitochondrial	MRPS14	sp|O60783|RT14_HUMAN 28S ribosomal protein S14, mitochondrial OS=Homo sapiens GN=MRPS14 PE=1 SV=1	1	1	1	1	1	1	1	1	1	1	1	1	1	1	1	1	1	1	1	1	1	1	11.7	11.7	11.7	15.139	128	128	0.0037547	6.8514	By matching	By matching	By matching	By MS/MS	By MS/MS	By matching	11.7	11.7	11.7	11.7	11.7	11.7
O60885	O60885	9	1	1	Bromodomain-containing protein 4	BRD4	sp|O60885|BRD4_HUMAN Bromodomain-containing protein 4 OS=Homo sapiens GN=BRD4 PE=1 SV=2	1	9	1	1	7	7	7	8	7	7	0	0	1	0	0	0	0	0	1	0	0	0	5.7	1	1	152.22	1362	1362	1	-2	By matching	By matching	By MS/MS	By matching	By matching	By matching	4	4	5.1	4.7	4	4
O75643	O75643	1	1	1	U5 small nuclear ribonucleoprotein 200 kDa helicase	SNRNP200	sp|O75643|U520_HUMAN U5 small nuclear ribonucleoprotein 200 kDa helicase OS=Homo sapiens GN=SNRNP200 PE=1 SV=2	1	1	1	1	1	1	1	1	1	1	1	1	1	1	1	1	1	1	1	1	1	1	0.5	0.5	0.5	244.5	2136	2136	0.009434	6.4439	By matching	By matching	By matching	By MS/MS	By MS/MS	By MS/MS	0.5	0.5	0.5	0.5	0.5	0.5
O76003	O76003	1	1	1	Glutaredoxin-3	GLRX3	sp|O76003|GLRX3_HUMAN Glutaredoxin-3 OS=Homo sapiens GN=GLRX3 PE=1 SV=2	1	1	1	1	0	1	1	1	1	1	0	1	1	1	1	1	0	1	1	1	1	1	3.9	3.9	3.9	37.432	335	335	0.0059666	6.5219		By matching	By MS/MS	By MS/MS	By matching	By MS/MS	0	3.9	3.9	3.9	3.9	3.9
O94760	O94760	1	1	1	N(G),N(G)-dimethylarginine dimethylaminohydrolase 1	DDAH1	sp|O94760|DDAH1_HUMAN N(G),N(G)-dimethylarginine dimethylaminohydrolase 1 OS=Homo sapiens GN=DDAH1 PE=1 SV=3	1	1	1	1	0	0	0	1	1	1	0	0	0	1	1	1	0	0	0	1	1	1	3.9	3.9	3.9	31.121	285	285	0.0013298	7.5818				By MS/MS	By MS/MS	By MS/MS	0	0	0	3.9	3.9	3.9
X6RI56;O94886	X6RI56;O94886	1;1	1;1	1;1	CSC1-like protein 1	TMEM63A	tr|X6RI56|X6RI56_HUMAN CSC1-like protein 1 (Fragment) OS=Homo sapiens GN=TMEM63A PE=1 SV=1;sp|O94886|CSCL1_HUMAN CSC1-like protein 1 OS=Homo sapiens GN=TMEM63A PE=1 SV=3	2	1	1	1	0	0	0	1	1	1	0	0	0	1	1	1	0	0	0	1	1	1	10.2	10.2	10.2	13.328	118	118;807	0.0049813	6.7745				By MS/MS	By MS/MS	By matching	0	0	0	10.2	10.2	10.2
O95202	O95202	1	1	1	LETM1 and EF-hand domain-containing protein 1, mitochondrial	LETM1	sp|O95202|LETM1_HUMAN LETM1 and EF-hand domain-containing protein 1, mitochondrial OS=Homo sapiens GN=LETM1 PE=1 SV=1	1	1	1	1	1	1	1	1	1	0	1	1	1	1	1	0	1	1	1	1	1	0	1.6	1.6	1.6	83.353	739	739	0.0013141	7.4482	By matching	By matching	By matching	By matching	By MS/MS		1.6	1.6	1.6	1.6	1.6	0
O95295	O95295	1	1	1	SNARE-associated protein Snapin	SNAPIN	sp|O95295|SNAPN_HUMAN SNARE-associated protein Snapin OS=Homo sapiens GN=SNAPIN PE=1 SV=1	1	1	1	1	0	0	0	1	0	0	0	0	0	1	0	0	0	0	0	1	0	0	15.4	15.4	15.4	14.874	136	136	0.0013717	8.074				By MS/MS			0	0	0	15.4	0	0
[truncated: 52 more rows]
[truncated: 34 more columns]
