# Supplementary material for: FER-mediated phosphorylation and PIK3R2 recruitment on IRS4 promotes AKT activation and tumorigenesis in ovarian cancer cells
Source: eLife. 2022 May 12;11:e76183. doi: 10.7554/eLife.76183 (PMC9098222; doi:10.7554/eLife.76183)
Supplement: Supplementary file 13. — Primers used in the construction of related FER and IRS4 mutants. [file elife-76183-supp13.xlsx]

## Sheet: Sheet1
Primer	Sequence
GFP-FER(1-446)-F	TTTCTGATTAGTGGTCGACGGTACCGCGGG
GFP-FER(1-446)-R	CCACTAATCAGAAAGTGCTGAAGAGCCCAGTGC
GFP-FER(447-822)-F	TCAGATCCATGATCTCCATCAGTGAGAAGCCTTTGGC
GFP-FER(447-822)-R	TGATGGAGATCATGGATCTGAGTCCGGACTTGTAC
GFP-FER(447-550)-F	CCTATTTAGTGGTCGACGGTACCGCGG
GFP-FER(447-550)-R	ACCACTAAATAGGATTCAGCAGAACTACACCTGATTTC
GFP-FER(563-822)-F	GATCCATGGTCATATTGGGAGAATTACTGGGCAAGG
GFP-FER-(563-822)-R	CCAATATGACCATGGATCTGAGTCCGGACTTGTACAG
Myc-IRS4-1-200-F	CTCATCCTCGAGTAAGAATTCTGCAGTCGACGGTTACC
Myc-IRS4-1-200-R	TTCTTACTCGAGGATGAGGCGGCTG
IRS4-200-400-Myc-F	GCTTCGATGGAGAGCAAGCGCCGCCGCTG
IRS4-200-400-Myc-R	CTTGCTCTCCATCGAAGCTTGAGCTCGAGATCTGGATCCC
IRS4-1	ATGGCGAGTTGCTCCTTCAC
IRS4-200	GAGAGCAAGCGCCGCCGCTGCG
IRS4-200-F	AGGACCTGCCCGTCGGGGAGGAGAGCAAGCGCCGCCGCTG
IRS4-336-F	CGGCGGCGGAGCCACCCTTCTACAGAGCCCGCTGCCGCAG
human IRS4-Y656F-F	GGAAGATTCAGACTTTTTTTTTGTGTTGACAGAGG
human IRS4-Y656F-R	CCTCTGTCAACACAAAAAAAAAGTCTGAATCTTCC
human IRS4-Y921F-F	GCTGACAGCTCTAGTGACTTCGTCAACATGGACTTCAC
human IRS4-Y921F-R	GTGAAGTCCATGTTGACGAAGTCACTAGAGCTGTCAGC
human IRS4-Y700F-F	GAAGATGAGGATGACCCATTCGTGCCAATGAGGCCAG
human IRS4-Y700F-R	CTGGCCTCATTGGCACGAATGGGTCATCCTCATCTTC
human IRS4-Y717F-F	TCTTGTAAGCTCCAGTGATTTTATGCCAATGGCTCCTC
human IRS4-Y717F-R	GAGGAGCCATTGGCATAAAATCACTGGAGCTTACAAGA
human IRS4-Y743F-F	GAAGATTCAAGAGGGTTCATGATGATGTTTCCCAG
human IRS4-Y743F-R	CTGGGAAACATCATCATGAACCCTCTTGAATCTTC
human IRS4-Y779F-F	GGACAATGACAGTGAGAGTGACTTCATGTTTATGGCTCC
human IRS4-Y779F-R	GGAGCCATAAACATGAAGTCACTCTCACTGTCATTGTCC
human IRS4-Y808F-F	CTCCAAAAGTTGGAGCTCCTTCTTCTCTCTACCAAAC
human IRS4-Y808F-R	GTTTGGTAGAGAGAAGAAGGAGCTCCAACTTTTGGAG
human IRS4-Y828F-F	CAGAATGACAACAGTGAGTTTGTGCCAATGTTACCTGG
human IRS4-Y828F-R	CCAGGTAACATTGGCACAAACTCACTGTTGTCATTCTG
human IRS4-Y847F-F	CTAGACAAAGAAGTCTCCTTTAACTGGGACCCCAAAGATG
human IRS4-Y847F-R	CATCTTTGGGGTCCCAGTTAAAGGAGACTTCTTTGTCTAG
human IRS4-Y899F-F	CTTTTATTACAAAAGGATTTAAAATCAAGCCAAAACCACA
human IRS4-Y899F-R	TGTGGTTTTGGCTTGATTTTAAATCCTTTTGTAATAAAAG
human IRS4-Y959F-F	CAGCCTTTTCTAATTTTGTGAATGTTGAGTTTGGAGTGCC
human IRS4-Y959F-R	GGCACTCCAAACTCAACATTCACAAAATTAGAAAAGGCTG
human IRS4-Y1016F-F	GAGGAAGAGGGTGACTTCATTGAAGTAATTTTC
human IRS4-Y1016F-R	GAAAATTACTTCAATGAAGTCACCCTCTTCCTC
human IRS4-Y1038F-F	GACAGTGCCATTCGCTTTGATGCTGAAACAGGTCG
human IRS4-Y1038F-R	CGACCTGTTTCAGCATCAAAGCGAATGGCACTGTC
human IRS4-Y1046F-F	GAAACAGGTCGAATCTTTGTGGTCGACCCATTTTCTG
human IRS4-Y1046F-R	CAGAAAATGGGTCGACCACAAAGATTCGACCTGTTTC
